# Supplementary material for: Enhanced Efficacy of Simultaneous PD-1 and PD-L1 Immune Checkpoint Blockade in High-Grade Serous Ovarian Cancer
Source: Oxford University Press journal article supplement (doi:10.1158/0008-5472.can-20-1674), 2020-11-06
Supplement: 00085472can201674-sup-243610_2_supp_6692629_qj3dcj.xlsx [file 00085472can201674-sup-243610_2_supp_6692629_qj3dcj.xlsx]

## Sheet: Table S5
Table S5: List of Genes Used to Generate NK Cell Activation Scores
FCGR3A
IL2RA
CD27
CD28
CD69
KLRD1
IL2RB
KLRB1
TNFRSF12A
CD244
KLRK1
NCR1
NCR2
NCR3
LILRA2
IFNAR1
IFNAR2
GZMA
GZMB
PRF1
IFNG
NKG7
