# Supplementary material for: Enhanced Efficacy of Simultaneous PD-1 and PD-L1 Immune Checkpoint Blockade in High-Grade Serous Ovarian Cancer
Source: Oxford University Press journal article supplement (doi:10.1158/0008-5472.can-20-1674), 2020-11-06
Supplement: 00085472can201674-sup-243610_2_supp_6692630_qj3dcj.xlsx [file 00085472can201674-sup-243610_2_supp_6692630_qj3dcj.xlsx]

## Sheet: S1A-C1 IgG vs PD-1
Table S1A: Differential Expression of Cluster 1 CD8 T cells IgG vs. PD-1
	p_val	avg_logFC	pct.1	pct.2	p_val_adj	Gene_ID	logP
RPL27	8.16065e-06	0.211638	1	0.951	0.164829	RPL27	5.08828
CFL1	0.000125171	0.177568	1	0.982	1	CFL1	3.9025
RPS27A	0.000148682	0.112877	1	1	1	RPS27A	3.82774
GZMB	0.000227165	0.43332	0.588	0.39	1	GZMB	3.64366
TSPOAP1-AS1	0.000254216	0.258544	0.188	0.055	1	TSPOAP1-AS1	3.5948
RPS12	0.000325225	0.128319	1	1	1	RPS12	3.48782
RPL18A	0.000462846	0.138118	1	1	1	RPL18A	3.33456
NPIPB5	0.000674145	0.189703	0.124	0.024	1	NPIPB5	3.17125
TMEM248	0.00100482	-0.28177	0.224	0.366	1	TMEM248	2.99791
ITM2C	0.00103978	-0.276143	0.724	0.866	1	ITM2C	2.98306
LAG3	0.00112607	0.23724	0.565	0.366	1	LAG3	2.94843
AK3	0.0011376	0.1957	0.147	0.043	1	AK3	2.94401
ANKRD36	0.00120653	0.237761	0.176	0.061	1	ANKRD36	2.91846
DCAF8	0.00124127	0.168364	0.118	0.024	1	DCAF8	2.90613
JADE1	0.0012445	0.23972	0.224	0.091	1	JADE1	2.90501
UQCC2	0.00126236	0.233694	0.288	0.14	1	UQCC2	2.89882
SERGEF	0.00172274	-0.241598	0.029	0.116	1	SERGEF	2.76378
GOLGA3	0.00188877	0.229119	0.182	0.067	1	GOLGA3	2.72382
DESI2	0.00212797	0.195585	0.182	0.067	1	DESI2	2.67203
RBM3	0.00213916	0.295409	0.482	0.329	1	RBM3	2.66976
TOPBP1	0.00216965	0.253838	0.159	0.055	1	TOPBP1	2.66361
AP1G2	0.00224732	0.219858	0.176	0.067	1	AP1G2	2.64834
YTHDC2	0.00228574	0.202695	0.218	0.091	1	YTHDC2	2.64097
RPL15	0.00229082	0.145812	1	1	1	RPL15	2.64001
PSMD5	0.00229765	0.216927	0.106	0.024	1	PSMD5	2.63872
RNF166	0.00261218	0.227039	0.453	0.28	1	RNF166	2.583
HIST1H1D	0.00265705	0.305107	0.412	0.256	1	HIST1H1D	2.5756
MX1	0.00267288	0.257511	0.265	0.128	1	MX1	2.57302
RPF1	0.00272898	-0.255382	0.106	0.226	1	RPF1	2.564
MRPL13	0.00279837	0.229091	0.306	0.165	1	MRPL13	2.5531
CRTAM	0.00282297	0.358982	0.318	0.171	1	CRTAM	2.54929
CIAPIN1	0.00286502	0.216143	0.176	0.067	1	CIAPIN1	2.54287
EEF1B2	0.00297113	0.166858	0.965	0.909	1	EEF1B2	2.52708
TPT1	0.00305247	0.100226	1	1	1	TPT1	2.51535
PTPN22	0.00321747	0.223788	0.506	0.335	1	PTPN22	2.49249
POLR2B	0.00334521	0.270904	0.471	0.311	1	POLR2B	2.47558
KLF12	0.00344238	-0.272895	0.082	0.189	1	KLF12	2.46314
CHTF8	0.00345223	0.194108	0.124	0.037	1	CHTF8	2.4619
LYPLA2	0.00356789	0.221962	0.271	0.134	1	LYPLA2	2.44759
RPS2	0.00363751	0.103964	1	1	1	RPS2	2.4392
CREBRF	0.00369713	0.2361	0.324	0.177	1	CREBRF	2.43214
CASP3	0.00374946	-0.272096	0.218	0.341	1	CASP3	2.42603
PPP3CA	0.00383479	-0.273476	0.1	0.207	1	PPP3CA	2.41626
CYB5R1	0.0043273	0.173553	0.112	0.03	1	CYB5R1	2.36378
ZNF672	0.00465881	0.20906	0.147	0.055	1	ZNF672	2.33173
C6orf120	0.00503717	0.187586	0.118	0.037	1	C6orf120	2.29781
MTERF4	0.00504627	-0.228538	0.247	0.384	1	MTERF4	2.29703
ING4	0.00509374	-0.222845	0.082	0.189	1	ING4	2.29296
GCLM	0.00532252	-0.25579	0.165	0.28	1	GCLM	2.27388
WAC-AS1	0.00535758	0.257678	0.212	0.104	1	WAC-AS1	2.27103
DYRK1A	0.00541929	-0.243868	0.124	0.238	1	DYRK1A	2.26606
LONP2	0.00560255	0.247213	0.235	0.116	1	LONP2	2.25161
RPL29	0.0056204	0.113114	1	1	1	RPL29	2.25023
DDX6	0.00567652	-0.241353	0.406	0.524	1	DDX6	2.24592
RPL35	0.00567932	0.139007	1	0.988	1	RPL35	2.2457
RANBP6	0.00584323	-0.194033	0.041	0.122	1	RANBP6	2.23335
RPS9	0.00621398	0.11965	1	1	1	RPS9	2.20663
RTCA	0.00621564	0.218079	0.288	0.159	1	RTCA	2.20651
SEC23A	0.00633507	-0.219261	0.082	0.183	1	SEC23A	2.19825
MIA3	0.00633682	0.251828	0.365	0.22	1	MIA3	2.19813
PDLIM2	0.00633879	0.226045	0.453	0.293	1	PDLIM2	2.19799
OASL	0.00642212	-0.183153	0.435	0.573	1	OASL	2.19232
WIPI1	0.00657193	0.176307	0.106	0.03	1	WIPI1	2.18231
PEX16	0.00664571	0.21717	0.235	0.122	1	PEX16	2.17746
FAM78A	0.00671153	0.218578	0.271	0.146	1	FAM78A	2.17318
RPL34	0.00685173	0.107736	1	1	1	RPL34	2.1642
RANBP1	0.00693279	-0.288706	0.288	0.384	1	RANBP1	2.15909
EHBP1	0.00709371	0.151037	0.118	0.037	1	EHBP1	2.14913
DCAF13	0.00735807	-0.260332	0.182	0.293	1	DCAF13	2.13324
RPLP1	0.007586	0.0996065	1	1	1	RPLP1	2.11999
MORC3	0.00760082	0.277363	0.341	0.226	1	MORC3	2.11914
COPRS	0.00775393	0.155644	0.124	0.043	1	COPRS	2.11048
GABARAPL2	0.00777621	-0.253578	0.512	0.598	1	GABARAPL2	2.10923
ZNF106	0.0079662	-0.220875	0.165	0.28	1	ZNF106	2.09875
IGLC2	0.00800192	-0.185944	0.035	0.11	1	IGLC2	2.09681
KLF2	0.00811021	0.342572	0.335	0.207	1	KLF2	2.09097
RPL19	0.00811393	0.084236	1	1	1	RPL19	2.09077
PICALM	0.0081523	0.185504	0.212	0.104	1	PICALM	2.08872
CDR2	0.00847586	0.164006	0.141	0.055	1	CDR2	2.07182
TMEM102	0.00858574	0.183138	0.141	0.055	1	TMEM102	2.06622
TMED9	0.00861189	-0.261847	0.318	0.415	1	TMED9	2.0649
PRPF39	0.00872334	0.155828	0.153	0.061	1	PRPF39	2.05932
SPG11	0.00872496	-0.239753	0.118	0.22	1	SPG11	2.05924
DNAJC16	0.00886279	0.156359	0.112	0.037	1	DNAJC16	2.05243
CAPZA1	0.00891538	-0.285535	0.465	0.543	1	CAPZA1	2.04986
RPA1	0.00899618	-0.159034	0.047	0.128	1	RPA1	2.04594
NSFL1C	0.00927755	-0.203801	0.065	0.152	1	NSFL1C	2.03257
QKI	0.00933892	0.160936	0.176	0.079	1	QKI	2.0297
TGFBR3	0.00939251	0.187643	0.112	0.037	1	TGFBR3	2.02722
VAMP2	0.00978691	-0.192631	0.594	0.707	1	VAMP2	2.00935
PQLC1	0.00981868	-0.203881	0.059	0.14	1	PQLC1	2.00795
BRAT1	0.00990551	0.180837	0.129	0.049	1	BRAT1	2.00412
RPS18	0.00994944	0.112841	1	0.994	1	RPS18	2.0022
PLEK	0.0100348	0.196785	0.406	0.262	1	PLEK	1.99849
EPSTI1	0.0101694	0.27132	0.271	0.152	1	EPSTI1	1.99271
PTPN6	0.0101864	0.25456	0.429	0.287	1	PTPN6	1.99198
TXNRD1	0.0103413	0.202776	0.182	0.085	1	TXNRD1	1.98542
CCDC71L	0.010472	0.191064	0.147	0.061	1	CCDC71L	1.97997
ADI1	0.0105452	0.190555	0.118	0.043	1	ADI1	1.97695
LIMD2	0.0107071	-0.19094	0.788	0.854	1	LIMD2	1.97033
CUL4A	0.0107508	0.148638	0.176	0.079	1	CUL4A	1.96856
SAMD1	0.0111371	-0.200128	0.059	0.14	1	SAMD1	1.95323
PPP1R14B	0.0118388	-0.280333	0.588	0.665	1	PPP1R14B	1.92669
ESF1	0.0120288	0.204965	0.294	0.177	1	ESF1	1.91978
C4orf48	0.0120395	0.200228	0.335	0.195	1	C4orf48	1.91939
G3BP2	0.0120512	0.184215	0.553	0.39	1	G3BP2	1.91897
RAB8B	0.0121508	-0.275115	0.247	0.348	1	RAB8B	1.91539
AC025164.1	0.0122113	0.166393	0.129	0.049	1	AC025164.1	1.91324
ARFGEF1	0.0123092	0.218445	0.259	0.146	1	ARFGEF1	1.90977
RPL27A	0.0124216	0.104187	1	0.988	1	RPL27A	1.90582
CCL5	0.0125213	-0.132325	1	1	1	CCL5	1.90235
ZYX	0.012574	-0.222764	0.129	0.232	1	ZYX	1.90053
TRIP12	0.012637	0.200975	0.312	0.189	1	TRIP12	1.89836
MED4	0.0128199	0.155782	0.359	0.213	1	MED4	1.89212
TMEM33	0.0130253	-0.22331	0.065	0.146	1	TMEM33	1.88521
CNDP2	0.0131871	0.156572	0.235	0.122	1	CNDP2	1.87985
ARHGEF1	0.0134059	-0.234846	0.494	0.622	1	ARHGEF1	1.8727
RPS16	0.0134084	0.0977319	1	1	1	RPS16	1.87262
ATP2B4	0.0134207	0.250864	0.371	0.25	1	ATP2B4	1.87223
HUWE1	0.0135373	0.164623	0.288	0.165	1	HUWE1	1.86847
STX18	0.0135754	0.163072	0.135	0.055	1	STX18	1.86725
RAC2	0.013622	0.126892	0.929	0.823	1	RAC2	1.86576
WAC	0.0136653	0.250825	0.441	0.317	1	WAC	1.86438
NKG7	0.0137497	0.156631	0.971	0.951	1	NKG7	1.86171
HLA-B	0.0139494	-0.088995	1	1	1	HLA-B	1.85544
RPA3	0.0140858	0.249649	0.318	0.201	1	RPA3	1.85122
GALNT6	0.0141156	0.118572	0.118	0.043	1	GALNT6	1.8503
STRBP	0.0141585	-0.212843	0.112	0.207	1	STRBP	1.84898
ABCB8	0.0142072	0.18354	0.106	0.037	1	ABCB8	1.84749
PCYOX1	0.0142199	0.169895	0.153	0.067	1	PCYOX1	1.8471
IARS	0.0142367	0.185679	0.176	0.085	1	IARS	1.84659
FAM98B	0.0142367	-0.185619	0.088	0.177	1	FAM98B	1.84659
XAF1	0.0143458	0.15766	0.424	0.262	1	XAF1	1.84328
ATR	0.014352	0.144211	0.135	0.055	1	ATR	1.84309
CCDC66	0.0144389	-0.287305	0.271	0.372	1	CCDC66	1.84047
CDKN2A	0.0146067	-0.24179	0.135	0.232	1	CDKN2A	1.83545
SLC25A28	0.0146645	-0.215342	0.059	0.134	1	SLC25A28	1.83373
THAP9-AS1	0.0146905	0.132887	0.118	0.043	1	THAP9-AS1	1.83296
DIS3	0.0146933	-0.21843	0.112	0.207	1	DIS3	1.83288
RAB1A	0.0147615	0.173918	0.188	0.091	1	RAB1A	1.83087
STK26	0.0148485	-0.219911	0.076	0.159	1	STK26	1.82832
ARHGAP35	0.0148508	0.177072	0.212	0.11	1	ARHGAP35	1.82825
CNOT9	0.0148587	-0.191109	0.088	0.177	1	CNOT9	1.82802
RNASET2	0.0149063	-0.192986	0.341	0.451	1	RNASET2	1.82663
FAM102A	0.0149542	-0.207524	0.241	0.36	1	FAM102A	1.82524
AMIGO2	0.0149756	-0.157895	0.065	0.146	1	AMIGO2	1.82462
LNPEP	0.0151417	0.194616	0.406	0.274	1	LNPEP	1.81983
ATP6V1G1	0.015335	0.192133	0.818	0.665	1	ATP6V1G1	1.81432
NDUFAF7	0.0155964	0.18252	0.141	0.061	1	NDUFAF7	1.80698
LATS1	0.0156252	0.164512	0.188	0.091	1	LATS1	1.80617
RPUSD3	0.015629	-0.192664	0.082	0.171	1	RPUSD3	1.80607
RABEP1	0.0159462	0.140728	0.294	0.171	1	RABEP1	1.79734
APOBEC3G	0.0163782	-0.201607	0.953	0.939	1	APOBEC3G	1.78573
LUC7L2	0.0163881	0.146712	0.241	0.128	1	LUC7L2	1.78547
ARHGEF6	0.0164862	0.205167	0.206	0.11	1	ARHGEF6	1.78288
PARP8	0.0166644	0.188347	0.394	0.262	1	PARP8	1.77821
USP14	0.016811	0.215349	0.312	0.201	1	USP14	1.77441
HIF1A	0.0169206	0.172005	0.371	0.232	1	HIF1A	1.77158
SH3KBP1	0.017284	-0.283542	0.482	0.537	1	SH3KBP1	1.76236
CHD2	0.0174339	-0.296188	0.276	0.372	1	CHD2	1.75861
CXXC1	0.0174802	0.148555	0.112	0.043	1	CXXC1	1.75745
KPNA2	0.0178066	0.141424	0.194	0.098	1	KPNA2	1.74942
ZMYM5	0.0180734	0.115322	0.206	0.104	1	ZMYM5	1.74296
C16orf54	0.0181786	-0.290275	0.224	0.323	1	C16orf54	1.74044
GON4L	0.0182068	0.151608	0.359	0.226	1	GON4L	1.73977
SLC50A1	0.0182283	0.170063	0.129	0.055	1	SLC50A1	1.73925
MED8	0.01877	0.16679	0.171	0.085	1	MED8	1.72654
SLC25A37	0.0188926	0.132122	0.153	0.067	1	SLC25A37	1.72371
CD38	0.0191126	0.201504	0.235	0.134	1	CD38	1.71868
PIK3R5	0.0191659	0.168553	0.112	0.043	1	PIK3R5	1.71747
MAD2L1BP	0.0191814	0.135968	0.194	0.098	1	MAD2L1BP	1.71712
ZNF675	0.0195966	0.14517	0.141	0.061	1	ZNF675	1.70782
IFI6	0.0196959	0.168644	0.3	0.183	1	IFI6	1.70563
DCAF16	0.019734	0.134549	0.124	0.049	1	DCAF16	1.70478
EBLN3P	0.0199683	-0.203356	0.124	0.22	1	EBLN3P	1.69966
MBD1	0.0199731	0.172826	0.147	0.067	1	MBD1	1.69955
HNRNPU	0.0201223	-0.127757	0.771	0.896	1	HNRNPU	1.69632
XPNPEP1	0.0201446	0.158928	0.165	0.079	1	XPNPEP1	1.69584
DENND4C	0.0202525	0.192695	0.135	0.061	1	DENND4C	1.69352
RWDD1	0.020392	0.194885	0.518	0.402	1	RWDD1	1.69054
MIR155HG	0.0208267	-0.258436	0.088	0.171	1	MIR155HG	1.68138
EIF4E2	0.0211628	0.149054	0.3	0.189	1	EIF4E2	1.67443
KCTD17	0.0212655	-0.143097	0.047	0.116	1	KCTD17	1.67232
AZI2	0.0212739	0.168938	0.188	0.098	1	AZI2	1.67215
RPL14	0.0213272	0.0819635	1	0.994	1	RPL14	1.67107
NSMCE2	0.0213552	0.164357	0.153	0.073	1	NSMCE2	1.6705
NPC1	0.0214023	0.138517	0.112	0.043	1	NPC1	1.66954
CUTC	0.0214131	0.200456	0.176	0.091	1	CUTC	1.66932
DNAJC1	0.021535	0.232073	0.435	0.317	1	DNAJC1	1.66686
ADAP1	0.0216504	0.131438	0.171	0.079	1	ADAP1	1.66453
SP100	0.0217555	0.168923	0.618	0.482	1	SP100	1.66243
ACBD6	0.0218554	0.180039	0.194	0.104	1	ACBD6	1.66044
KDM5A	0.0219933	0.189437	0.471	0.323	1	KDM5A	1.65771
KEAP1	0.0220451	-0.18369	0.053	0.122	1	KEAP1	1.65669
ATP1A1	0.0225707	0.157782	0.388	0.262	1	ATP1A1	1.64645
C2orf68	0.0226759	0.104135	0.112	0.043	1	C2orf68	1.64444
NDUFA4	0.0230466	0.147608	0.806	0.756	1	NDUFA4	1.63739
UTRN	0.0231011	0.207849	0.5	0.396	1	UTRN	1.63637
PLGRKT	0.0232865	0.194925	0.229	0.134	1	PLGRKT	1.6329
NARF	0.0240816	-0.230032	0.176	0.268	1	NARF	1.61831
CHIC2	0.0244787	0.190184	0.241	0.146	1	CHIC2	1.61121
TOPORS	0.0244868	-0.260612	0.147	0.238	1	TOPORS	1.61107
BCL2	0.024529	-0.257711	0.224	0.311	1	BCL2	1.61032
RHOG	0.0246689	0.161846	0.441	0.293	1	RHOG	1.60785
CDK11A	0.0246879	0.149744	0.247	0.14	1	CDK11A	1.60752
PCNX2	0.0247534	0.169238	0.176	0.091	1	PCNX2	1.60636
AL359220.1	0.0248444	-0.292836	0.124	0.207	1	AL359220.1	1.60477
CNOT6L	0.0249366	0.165595	0.494	0.354	1	CNOT6L	1.60316
ESYT2	0.0249511	0.15935	0.106	0.043	1	ESYT2	1.60291
ZNF430	0.0250755	-0.199467	0.206	0.305	1	ZNF430	1.60075
HNRNPF	0.0252346	-0.127964	0.824	0.817	1	HNRNPF	1.598
UBE2F	0.0252802	0.150939	0.171	0.085	1	UBE2F	1.59722
KIAA0040	0.0253284	0.181307	0.235	0.134	1	KIAA0040	1.59639
43899	0.0253657	0.121393	0.206	0.11	1	43899	1.59575
SNAPC1	0.0254366	0.15573	0.106	0.043	1	SNAPC1	1.59454
USP39	0.0258249	-0.170957	0.047	0.11	1	USP39	1.58796
DNAJC3	0.0263025	-0.19227	0.165	0.256	1	DNAJC3	1.58
FKBP5	0.0263279	-0.182344	0.059	0.128	1	FKBP5	1.57958
PDLIM1	0.0263965	-0.156011	0.041	0.104	1	PDLIM1	1.57845
NDUFA12	0.0269147	-0.146288	0.494	0.585	1	NDUFA12	1.57001
KATNA1	0.0270463	0.151819	0.176	0.091	1	KATNA1	1.56789
RASSF3	0.0271148	0.177738	0.165	0.085	1	RASSF3	1.56679
TAF7	0.0271589	-0.219013	0.441	0.518	1	TAF7	1.56609
FBXL5	0.0271645	0.104685	0.159	0.079	1	FBXL5	1.566
OTULINL	0.0273149	0.179827	0.206	0.116	1	OTULINL	1.5636
PTPMT1	0.0274113	0.143243	0.135	0.061	1	PTPMT1	1.56207
POMP	0.0274263	0.131789	0.712	0.567	1	POMP	1.56183
NDUFS1	0.0274387	0.194089	0.206	0.116	1	NDUFS1	1.56164
APOL1	0.0275253	-0.174493	0.076	0.152	1	APOL1	1.56027
PSMB5	0.027581	0.166095	0.241	0.14	1	PSMB5	1.55939
EPB41	0.0276256	0.16153	0.588	0.476	1	EPB41	1.55869
XRRA1	0.027708	-0.142276	0.053	0.122	1	XRRA1	1.55739
CWF19L2	0.0279167	-0.228879	0.171	0.262	1	CWF19L2	1.55414
CARF	0.027959	0.17751	0.147	0.073	1	CARF	1.55348
RMC1	0.0281868	-0.148483	0.047	0.11	1	RMC1	1.54995
M6PR	0.0283276	0.131133	0.376	0.25	1	M6PR	1.54779
TCEA1	0.0283883	-0.218114	0.453	0.543	1	TCEA1	1.54686
AHSA1	0.0285923	-0.190257	0.224	0.317	1	AHSA1	1.54375
IMPAD1	0.0288875	0.155346	0.106	0.043	1	IMPAD1	1.53929
PPP1CB	0.0288904	-0.187877	0.294	0.396	1	PPP1CB	1.53925
DMWD	0.0290801	0.111706	0.153	0.073	1	DMWD	1.5364
C1orf52	0.0291263	0.159614	0.2	0.11	1	C1orf52	1.53572
STMN1	0.029232	0.149498	0.153	0.073	1	STMN1	1.53414
SPTY2D1	0.0292979	0.171017	0.182	0.098	1	SPTY2D1	1.53316
SERPINB6	0.0293847	0.156895	0.153	0.073	1	SERPINB6	1.53188
MCM3AP	0.0294361	-0.136934	0.047	0.11	1	MCM3AP	1.53112
UBR7	0.0294384	0.166243	0.106	0.043	1	UBR7	1.53109
TMEM63A	0.0294384	0.117803	0.106	0.043	1	TMEM63A	1.53109
URI1	0.0294979	0.137734	0.394	0.274	1	URI1	1.53021
RPL12	0.0297436	0.11341	0.994	0.994	1	RPL12	1.52661
TTC5	0.0298455	-0.193218	0.1	0.177	1	TTC5	1.52512
VPS28	0.0299605	0.10884	0.782	0.652	1	VPS28	1.52345
ATG16L1	0.0299627	0.129987	0.135	0.061	1	ATG16L1	1.52342
KIAA2026	0.0301382	-0.250476	0.188	0.268	1	KIAA2026	1.52088
COPS5	0.0303327	0.145257	0.318	0.201	1	COPS5	1.51809
NAXE	0.0310618	0.130998	0.271	0.165	1	NAXE	1.50777
FBXW2	0.0311465	-0.19633	0.094	0.171	1	FBXW2	1.50659
FBXW5	0.0312843	0.171952	0.424	0.305	1	FBXW5	1.50467
MID1IP1	0.0318713	0.119859	0.124	0.055	1	MID1IP1	1.4966
TBX21	0.0319256	0.147044	0.129	0.061	1	TBX21	1.49586
BOD1	0.0319314	0.109252	0.106	0.043	1	BOD1	1.49578
BBX	0.0321018	0.102587	0.441	0.299	1	BBX	1.49347
SBNO1	0.0326831	0.128699	0.359	0.226	1	SBNO1	1.48568
GLIPR2	0.0328028	-0.184137	0.359	0.457	1	GLIPR2	1.48409
FAM118A	0.0328527	0.17876	0.582	0.451	1	FAM118A	1.48343
FKBP3	0.0328544	0.159069	0.306	0.195	1	FKBP3	1.48341
TPP2	0.0329691	0.201112	0.241	0.152	1	TPP2	1.48189
DYNLRB1	0.0331449	-0.146532	0.571	0.683	1	DYNLRB1	1.47958
XPA	0.0332758	-0.210614	0.171	0.256	1	XPA	1.47787
SH2D1A	0.033398	0.256396	0.529	0.427	1	SH2D1A	1.47628
RPS14	0.033655	0.0608266	1	1	1	RPS14	1.47295
NOL9	0.033694	-0.163581	0.082	0.159	1	NOL9	1.47245
SNX10	0.0339568	-0.170423	0.071	0.14	1	SNX10	1.46907
STUB1	0.0339607	-0.158339	0.435	0.524	1	STUB1	1.46902
GPKOW	0.0346825	0.145148	0.129	0.061	1	GPKOW	1.45989
DDX24	0.0347195	-0.202186	0.629	0.683	1	DDX24	1.45943
GNL2	0.034865	0.113896	0.141	0.067	1	GNL2	1.45761
ZNF37A	0.0353457	-0.223663	0.141	0.22	1	ZNF37A	1.45166
ABHD17A	0.0354122	0.125131	0.688	0.524	1	ABHD17A	1.45085
ZFP36	0.0354536	0.150768	0.394	0.268	1	ZFP36	1.45034
TCF12	0.0356457	0.139068	0.129	0.061	1	TCF12	1.44799
PTMS	0.0356599	0.205236	0.453	0.341	1	PTMS	1.44782
ANKRD13D	0.0356934	0.155583	0.435	0.323	1	ANKRD13D	1.44741
SERF2	0.035745	0.0745952	0.988	0.976	1	SERF2	1.44678
NAA60	0.035841	0.158584	0.129	0.061	1	NAA60	1.44562
ACTB	0.0358454	0.101532	1	1	1	ACTB	1.44557
TIMM17B	0.0358619	0.143674	0.276	0.171	1	TIMM17B	1.44537
CCDC167	0.0359248	-0.167426	0.3	0.396	1	CCDC167	1.44461
UBE2B	0.0359663	-0.195248	0.494	0.573	1	UBE2B	1.4441
LINC00861	0.0359812	-0.234795	0.488	0.561	1	LINC00861	1.44392
SRSF3	0.0360215	0.157521	0.747	0.659	1	SRSF3	1.44344
APOBEC3C	0.036024	-0.186441	0.559	0.64	1	APOBEC3C	1.44341
VPS36	0.0362156	0.178685	0.394	0.274	1	VPS36	1.4411
CASD1	0.0362606	0.0954081	0.153	0.073	1	CASD1	1.44056
STAG1	0.036277	-0.229923	0.124	0.201	1	STAG1	1.44037
TMBIM6	0.0363009	-0.109308	0.8	0.799	1	TMBIM6	1.44008
LY9	0.0363923	-0.0936028	0.147	0.25	1	LY9	1.43899
NIN	0.0364372	0.177734	0.406	0.28	1	NIN	1.43846
JAK1	0.0365243	0.132136	0.794	0.695	1	JAK1	1.43742
PDE4D	0.0365305	0.10877	0.241	0.14	1	PDE4D	1.43734
FAM219B	0.0366462	-0.142852	0.076	0.146	1	FAM219B	1.43597
ANXA7	0.0366589	-0.22353	0.282	0.366	1	ANXA7	1.43582
TMEM70	0.0366971	0.129481	0.194	0.11	1	TMEM70	1.43537
FAM107B	0.0368926	0.166382	0.624	0.524	1	FAM107B	1.43306
TBC1D17	0.0370874	-0.146747	0.053	0.116	1	TBC1D17	1.43077
SEC61A1	0.0370908	0.163298	0.182	0.104	1	SEC61A1	1.43073
VPS13B	0.0373022	-0.117661	0.047	0.11	1	VPS13B	1.42827
IKBKE	0.0374368	0.124772	0.165	0.085	1	IKBKE	1.4267
LSM3	0.037628	-0.148323	0.306	0.402	1	LSM3	1.42449
MCM3	0.0376656	0.164388	0.176	0.098	1	MCM3	1.42406
EAF1	0.0377347	-0.137513	0.053	0.116	1	EAF1	1.42326
CRCP	0.0377934	0.158879	0.171	0.091	1	CRCP	1.42258
BRD1	0.0378515	-0.230131	0.112	0.189	1	BRD1	1.42192
SNAPC2	0.0378648	-0.160164	0.059	0.122	1	SNAPC2	1.42176
ACSF3	0.0379476	-0.199783	0.065	0.128	1	ACSF3	1.42082
CD2AP	0.0381284	0.16214	0.2	0.122	1	CD2AP	1.41875
SPAST	0.0381517	-0.212603	0.047	0.104	1	SPAST	1.41849
MSC	0.0382735	0.128706	0.194	0.11	1	MSC	1.4171
RAB9A	0.0383733	0.113644	0.271	0.165	1	RAB9A	1.41597
GSDMD	0.0384609	0.188067	0.494	0.366	1	GSDMD	1.41498
ZCCHC17	0.03852	-0.169553	0.147	0.232	1	ZCCHC17	1.41431
SLC27A2	0.0385364	0.137809	0.118	0.055	1	SLC27A2	1.41413
SGTB	0.0386191	0.161169	0.124	0.061	1	SGTB	1.4132
MPHOSPH6	0.0386831	0.118399	0.188	0.104	1	MPHOSPH6	1.41248
NUP54	0.0387236	-0.171815	0.106	0.183	1	NUP54	1.41202
LSM10	0.0389942	0.183261	0.335	0.244	1	LSM10	1.409
BAK1	0.0390685	0.109051	0.241	0.134	1	BAK1	1.40817
TRMT10C	0.0391122	-0.196778	0.2	0.287	1	TRMT10C	1.40769
DDX52	0.0392986	-0.235216	0.118	0.189	1	DDX52	1.40562
RPL39	0.0394938	0.0897537	0.994	1	1	RPL39	1.40347
GSK3B	0.0395161	0.120054	0.129	0.061	1	GSK3B	1.40323
COMMD4	0.0395633	0.151299	0.247	0.146	1	COMMD4	1.40271
MRPL48	0.0398097	0.0736427	0.182	0.098	1	MRPL48	1.40001
PIH1D1	0.039956	-0.197368	0.159	0.238	1	PIH1D1	1.39842
MANEA-DT	0.0400509	-0.181073	0.065	0.128	1	MANEA-DT	1.39739
GTF2F1	0.0401484	0.146049	0.2	0.116	1	GTF2F1	1.39633
BIN2	0.0401922	0.225507	0.541	0.47	1	BIN2	1.39586
KPNA5	0.0402639	0.199747	0.176	0.104	1	KPNA5	1.39508
CAPG	0.0404203	0.15485	0.241	0.146	1	CAPG	1.3934
C12orf49	0.040545	0.180943	0.165	0.091	1	C12orf49	1.39206
RBM15B	0.0405825	0.14624	0.135	0.067	1	RBM15B	1.39166
DDX60L	0.0406986	0.08054	0.176	0.091	1	DDX60L	1.39042
VRK3	0.0407512	0.146024	0.247	0.146	1	VRK3	1.38986
HEXB	0.0407947	0.128285	0.135	0.067	1	HEXB	1.3894
SDCBP	0.0408922	0.0995106	0.347	0.226	1	SDCBP	1.38836
MOCS2	0.0409902	0.183864	0.141	0.073	1	MOCS2	1.38732
PRDX5	0.0409955	-0.197722	0.518	0.591	1	PRDX5	1.38726
NIP7	0.0413934	-0.203296	0.259	0.341	1	NIP7	1.38307
MARF1	0.0414039	-0.23049	0.053	0.11	1	MARF1	1.38296
MBD5	0.0415108	0.135249	0.318	0.207	1	MBD5	1.38184
COPS7B	0.0416891	0.150873	0.118	0.055	1	COPS7B	1.37998
POLR2J3.1	0.0417572	-0.127508	0.441	0.53	1	POLR2J3.1	1.37927
CCDC97	0.0418381	-0.178831	0.1	0.171	1	CCDC97	1.37843
MAP2K2	0.0422685	0.197438	0.671	0.537	1	MAP2K2	1.37398
CCDC12	0.0422807	0.156604	0.571	0.433	1	CCDC12	1.37386
CTCF	0.0423369	-0.177752	0.282	0.366	1	CTCF	1.37328
CNOT8	0.042611	0.135527	0.153	0.079	1	CNOT8	1.37048
ISY1	0.0433993	0.177439	0.171	0.098	1	ISY1	1.36252
RPS24	0.0436296	0.0853046	1	1	1	RPS24	1.36022
ATP1B3	0.0439168	0.13986	0.424	0.293	1	ATP1B3	1.35737
ARL4C	0.0440261	0.111733	0.859	0.793	1	ARL4C	1.35629
LRRC41	0.0440725	0.119456	0.118	0.055	1	LRRC41	1.35583
COMMD7	0.0442685	0.181615	0.429	0.299	1	COMMD7	1.3539
RDH11	0.0442818	-0.155487	0.165	0.256	1	RDH11	1.35377
EIF2S1	0.0443896	0.144676	0.3	0.201	1	EIF2S1	1.35272
LUZP1	0.0444056	0.16556	0.294	0.189	1	LUZP1	1.35256
AC243960.1	0.0445599	0.186702	0.218	0.134	1	AC243960.1	1.35106
EIF5	0.0445745	-0.238928	0.535	0.555	1	EIF5	1.35091
RCSD1	0.044723	0.129737	0.435	0.287	1	RCSD1	1.34947
PNISR	0.0448286	-0.188559	0.865	0.854	1	PNISR	1.34844
PDHA1	0.044841	0.150259	0.224	0.134	1	PDHA1	1.34832
ZNF43	0.0451249	-0.179011	0.071	0.134	1	ZNF43	1.34558
FOXN2	0.0451253	0.158271	0.159	0.085	1	FOXN2	1.34558
RPL26	0.0451884	0.0788581	1	1	1	RPL26	1.34497
LRCH4	0.0452614	-0.201857	0.135	0.213	1	LRCH4	1.34427
LRIG2	0.0453822	-0.183363	0.053	0.11	1	LRIG2	1.34311
APOL3	0.0455278	0.18093	0.306	0.213	1	APOL3	1.34172
PET100	0.0456901	-0.153257	0.359	0.439	1	PET100	1.34018
KARS	0.0456971	0.161348	0.229	0.14	1	KARS	1.34011
CD7	0.0457251	0.171479	0.594	0.482	1	CD7	1.33985
C6orf226	0.0458084	0.131876	0.118	0.055	1	C6orf226	1.33905
EVI2A	0.0458769	0.158661	0.324	0.226	1	EVI2A	1.33841
MEX3C	0.0460094	-0.200819	0.082	0.146	1	MEX3C	1.33715
NDUFV1	0.0462168	0.152162	0.2	0.116	1	NDUFV1	1.3352
ZNF787	0.0464078	0.143827	0.165	0.091	1	ZNF787	1.33341
WDFY1	0.0466518	0.107261	0.135	0.067	1	WDFY1	1.33113
GPN3	0.0468905	0.0930358	0.135	0.067	1	GPN3	1.32891
RTF1	0.047078	-0.212678	0.371	0.439	1	RTF1	1.32718
FXR1	0.0472426	0.169009	0.371	0.256	1	FXR1	1.32567
TM7SF3	0.0473913	-0.142672	0.082	0.152	1	TM7SF3	1.3243
SENP1	0.0478369	-0.119708	0.047	0.104	1	SENP1	1.32024
CDK2AP2	0.0481223	-0.207765	0.453	0.555	1	CDK2AP2	1.31765
PEX1	0.0481246	0.117665	0.118	0.055	1	PEX1	1.31763
EXOSC3	0.0481587	0.169343	0.224	0.14	1	EXOSC3	1.31733
NRBP1	0.0485527	-0.225968	0.194	0.268	1	NRBP1	1.31379
RALA	0.0486538	-0.190688	0.3	0.384	1	RALA	1.31288
SUCLA2	0.0486786	0.120418	0.194	0.11	1	SUCLA2	1.31266
MRPS23	0.0487185	0.140109	0.294	0.189	1	MRPS23	1.31231
ZFP62	0.0487656	-0.202076	0.082	0.146	1	ZFP62	1.31189
PPP1R10	0.048847	0.144571	0.371	0.268	1	PPP1R10	1.31116
C7orf50	0.0488475	0.170781	0.182	0.11	1	C7orf50	1.31116
ALG13	0.0492074	0.12648	0.265	0.165	1	ALG13	1.30797
SYAP1	0.0492388	0.164912	0.206	0.122	1	SYAP1	1.30769
NSUN2	0.0496916	0.150538	0.129	0.067	1	NSUN2	1.30372
TMED10	0.0504069	0.145936	0.329	0.213	1	TMED10	1.29751
TACC3	0.0504235	0.157581	0.176	0.104	1	TACC3	1.29737
GTPBP1	0.0505081	0.135546	0.124	0.061	1	GTPBP1	1.29664
SCAF4	0.0507181	-0.178607	0.088	0.152	1	SCAF4	1.29484
MOSMO	0.0507742	0.130602	0.124	0.061	1	MOSMO	1.29436
C7orf26	0.0508045	0.135195	0.106	0.049	1	C7orf26	1.2941
PDZD11	0.0508604	0.111061	0.241	0.146	1	PDZD11	1.29362
ZNF160	0.0511852	-0.160944	0.076	0.14	1	ZNF160	1.29086
MDM2	0.0513128	-0.167338	0.106	0.177	1	MDM2	1.28977
DNMT3A	0.0513853	0.142687	0.106	0.049	1	DNMT3A	1.28916
SUDS3	0.0518678	-0.179237	0.118	0.189	1	SUDS3	1.2851
DNASE1	0.0519261	-0.225684	0.124	0.189	1	DNASE1	1.28461
LINC01934	0.0520193	0.157523	0.212	0.134	1	LINC01934	1.28384
CPSF7	0.0521918	-0.116662	0.047	0.104	1	CPSF7	1.2824
ZMYM4	0.0521976	-0.148462	0.076	0.14	1	ZMYM4	1.28235
N4BP1	0.0524451	0.127894	0.382	0.262	1	N4BP1	1.28029
PLEKHF1	0.0528677	-0.18671	0.341	0.415	1	PLEKHF1	1.27681
PSMC1	0.0530037	0.103241	0.388	0.268	1	PSMC1	1.27569
RAB33A	0.0531297	-0.111538	0.118	0.195	1	RAB33A	1.27466
PPIP5K2	0.0534123	0.181377	0.147	0.079	1	PPIP5K2	1.27236
OSBPL8	0.053449	0.163276	0.376	0.268	1	OSBPL8	1.27206
GMPS	0.0537377	0.132793	0.229	0.146	1	GMPS	1.26972
PTTG1IP	0.0540012	0.112788	0.182	0.104	1	PTTG1IP	1.2676
CD70	0.0541201	-0.070797	0.082	0.152	1	CD70	1.26664
ETS1	0.0541253	0.144094	0.659	0.512	1	ETS1	1.2666
FLII	0.0541783	0.12918	0.241	0.152	1	FLII	1.26617
C9orf78	0.0541868	0.09221	0.588	0.451	1	C9orf78	1.26611
SAE1	0.0543735	0.102198	0.106	0.049	1	SAE1	1.26461
ITPKB	0.0545177	0.146754	0.153	0.085	1	ITPKB	1.26346
USO1	0.0545215	0.114567	0.218	0.134	1	USO1	1.26343
GTF2A1	0.0545367	-0.155808	0.076	0.14	1	GTF2A1	1.26331
CPSF2	0.0549515	0.143708	0.218	0.134	1	CPSF2	1.26002
KLF6	0.0551048	-0.143767	0.765	0.811	1	KLF6	1.25881
MTMR14	0.0551557	0.125397	0.165	0.091	1	MTMR14	1.25841
IPO7	0.0552555	0.139735	0.235	0.146	1	IPO7	1.25762
RNPC3	0.0552841	0.125809	0.129	0.067	1	RNPC3	1.2574
UROS	0.0553008	0.157246	0.182	0.11	1	UROS	1.25727
PSMA3-AS1	0.0558558	-0.178001	0.471	0.53	1	PSMA3-AS1	1.25293
MAN2A1	0.0559585	0.144293	0.176	0.104	1	MAN2A1	1.25213
JAKMIP1	0.0559704	0.119975	0.229	0.14	1	JAKMIP1	1.25204
MRPL21	0.0564934	0.135485	0.276	0.183	1	MRPL21	1.248
SUPT16H	0.0565172	-0.2283	0.318	0.39	1	SUPT16H	1.24782
FAM210A	0.0565504	0.124105	0.106	0.049	1	FAM210A	1.24756
CTDNEP1	0.0568625	-0.211317	0.241	0.311	1	CTDNEP1	1.24517
ZNF276	0.0570391	0.128458	0.324	0.22	1	ZNF276	1.24383
THOC2	0.0570499	-0.187702	0.235	0.323	1	THOC2	1.24375
LSM8	0.0571604	0.140243	0.6	0.47	1	LSM8	1.24291
RNF10	0.0571959	0.187652	0.235	0.152	1	RNF10	1.24263
DECR1	0.0574123	-0.200766	0.224	0.305	1	DECR1	1.24099
RASA2	0.0574792	0.176022	0.276	0.177	1	RASA2	1.24049
HMGN2	0.0581037	0.132631	0.6	0.47	1	HMGN2	1.2358
NPM1	0.0581403	0.105837	0.924	0.909	1	NPM1	1.23552
DBF4	0.0581606	0.122888	0.176	0.104	1	DBF4	1.23537
DENND4B	0.058417	0.122097	0.129	0.067	1	DENND4B	1.23346
NAP1L4	0.0588547	0.114962	0.576	0.439	1	NAP1L4	1.23022
SCAMP1-AS1	0.0590022	0.142712	0.129	0.067	1	SCAMP1-AS1	1.22913
BRAP	0.0591723	-0.167548	0.059	0.116	1	BRAP	1.22788
GTSF1	0.0598387	0.0978467	0.112	0.055	1	GTSF1	1.22302
MPHOSPH10	0.0598737	0.134421	0.3	0.201	1	MPHOSPH10	1.22276
SEC22B	0.0601656	-0.214209	0.218	0.293	1	SEC22B	1.22065
ASH2L	0.0601871	-0.150599	0.071	0.128	1	ASH2L	1.2205
KCTD7	0.0602341	-0.162269	0.065	0.122	1	KCTD7	1.22016
ANKRD13A	0.0604938	0.127032	0.2	0.122	1	ANKRD13A	1.21829
C19orf12	0.0605059	0.124232	0.147	0.079	1	C19orf12	1.2182
CFAP97	0.0608851	0.12925	0.247	0.152	1	CFAP97	1.21549
NAA30	0.0609104	-0.137317	0.059	0.116	1	NAA30	1.21531
CINP	0.0609104	-0.154831	0.059	0.116	1	CINP	1.21531
GZMH	0.0610834	0.208321	0.653	0.555	1	GZMH	1.21408
NOB1	0.0610895	-0.111458	0.094	0.165	1	NOB1	1.21403
XRN1	0.0611344	0.142891	0.406	0.299	1	XRN1	1.21371
IRF1	0.0614749	0.097521	0.865	0.75	1	IRF1	1.2113
TTC1	0.061544	-0.200899	0.259	0.335	1	TTC1	1.21081
ANKIB1	0.0616295	0.104785	0.165	0.091	1	ANKIB1	1.21021
SNHG15	0.0617926	-0.173681	0.135	0.207	1	SNHG15	1.20906
ZNF683	0.0619195	-0.27504	0.1	0.165	1	ZNF683	1.20817
LPAR2	0.0621022	0.0816418	0.124	0.061	1	LPAR2	1.20689
SAP30BP	0.0621391	0.109954	0.229	0.14	1	SAP30BP	1.20664
AUTS2	0.0621735	0.119122	0.165	0.091	1	AUTS2	1.20639
ZNF593	0.0624755	0.122598	0.194	0.116	1	ZNF593	1.20429
ATP10D	0.0625269	0.0463496	0.118	0.055	1	ATP10D	1.20393
FAM207A	0.0625614	-0.123892	0.088	0.159	1	FAM207A	1.20369
PDXDC1	0.0627072	-0.229882	0.129	0.195	1	PDXDC1	1.20268
CREM	0.0630119	0.153709	0.188	0.116	1	CREM	1.20058
PLEC	0.0630128	-0.182754	0.159	0.226	1	PLEC	1.20057
ZNF737	0.063054	0.115543	0.124	0.061	1	ZNF737	1.20029
DDX46	0.0636616	-0.178898	0.547	0.604	1	DDX46	1.19612
MBD6	0.063785	0.125306	0.112	0.055	1	MBD6	1.19528
CYSTM1	0.0638058	0.136156	0.206	0.128	1	CYSTM1	1.19514
TESC	0.0640076	0.131799	0.194	0.116	1	TESC	1.19377
GABPB1	0.0642196	0.0806284	0.106	0.049	1	GABPB1	1.19233
SURF4	0.0643834	0.169741	0.429	0.335	1	SURF4	1.19123
GGA2	0.0645357	-0.157012	0.218	0.305	1	GGA2	1.1902
BCAS2	0.0645606	-0.140694	0.176	0.25	1	BCAS2	1.19003
MAEA	0.0650951	0.103459	0.165	0.091	1	MAEA	1.18645
SNF8	0.0653953	0.147522	0.394	0.28	1	SNF8	1.18445
POLG	0.065455	0.107026	0.147	0.079	1	POLG	1.18406
MRPL11	0.065548	0.131054	0.259	0.171	1	MRPL11	1.18344
DHRS4L2	0.065766	0.117924	0.129	0.067	1	DHRS4L2	1.182
MRPS5	0.0659614	-0.166931	0.235	0.311	1	MRPS5	1.18071
SRPK2	0.0659813	0.146589	0.371	0.268	1	SRPK2	1.18058
ARL6IP6	0.0660429	0.105426	0.188	0.11	1	ARL6IP6	1.18017
NFKBID	0.0663621	0.0926368	0.147	0.079	1	NFKBID	1.17808
ABCF2.1	0.0664115	0.119737	0.129	0.067	1	ABCF2.1	1.17776
HLA-DRB1	0.0667282	-0.202564	0.835	0.872	1	HLA-DRB1	1.17569
LUC7L	0.0667825	0.0860388	0.206	0.122	1	LUC7L	1.17534
PHF5A	0.0669455	0.134574	0.159	0.091	1	PHF5A	1.17428
BBIP1	0.0670709	0.135153	0.2	0.122	1	BBIP1	1.17347
ZDHHC2	0.0671588	-0.176498	0.106	0.171	1	ZDHHC2	1.1729
ERGIC3	0.0673352	-0.196685	0.129	0.195	1	ERGIC3	1.17176
ZNF281	0.0673693	-0.222824	0.2	0.268	1	ZNF281	1.17154
TAZ	0.0674809	-0.173091	0.076	0.134	1	TAZ	1.17082
AC020916.1	0.0674809	-0.181774	0.076	0.134	1	AC020916.1	1.17082
SRSF9	0.0675446	0.159125	0.747	0.61	1	SRSF9	1.17041
CBLB	0.0679007	0.185222	0.347	0.256	1	CBLB	1.16813
NDUFV2	0.068122	0.136384	0.541	0.439	1	NDUFV2	1.16671
ATRAID	0.0681631	0.102684	0.459	0.335	1	ATRAID	1.16645
ZNF131	0.0681952	-0.230502	0.224	0.293	1	ZNF131	1.16625
SUMF2	0.0683842	-0.156292	0.165	0.238	1	SUMF2	1.16504
BIRC6	0.0686317	-0.16599	0.241	0.323	1	BIRC6	1.16348
GPRIN3	0.0689214	0.165476	0.482	0.378	1	GPRIN3	1.16165
RPS21	0.0692131	0.0800611	0.965	0.976	1	RPS21	1.15981
STARD3	0.0695546	-0.199939	0.1	0.165	1	STARD3	1.15767
GALNT11	0.0696997	-0.208567	0.176	0.244	1	GALNT11	1.15677
LUC7L3	0.070052	-0.128239	0.718	0.744	1	LUC7L3	1.15458
RBCK1	0.0702683	0.108511	0.441	0.317	1	RBCK1	1.15324
PARVG	0.070444	0.17982	0.335	0.244	1	PARVG	1.15216
SNHG8	0.071006	0.143684	0.318	0.226	1	SNHG8	1.1487
AL357060.1	0.0710766	-0.169862	0.071	0.128	1	AL357060.1	1.14827
TBC1D22A	0.0711537	0.100723	0.176	0.104	1	TBC1D22A	1.1478
PPAN	0.0718299	0.0903991	0.171	0.098	1	PPAN	1.14369
FAAP20	0.0721072	0.165746	0.341	0.238	1	FAAP20	1.14202
LINC01943	0.0721533	-0.224001	0.294	0.372	1	LINC01943	1.14174
UBXN4	0.0721666	0.162614	0.735	0.622	1	UBXN4	1.14166
SGF29	0.0724193	0.101878	0.135	0.073	1	SGF29	1.14015
COA6	0.0724644	-0.134461	0.212	0.293	1	COA6	1.13988
MAN2B2	0.0726207	0.116663	0.118	0.061	1	MAN2B2	1.13894
FAM122A	0.0729225	-0.160769	0.053	0.104	1	FAM122A	1.13714
ELP3	0.073075	0.0803071	0.112	0.055	1	ELP3	1.13623
GRAMD1A	0.0731343	0.117282	0.247	0.165	1	GRAMD1A	1.13588
MRPL41	0.0732796	0.0780518	0.629	0.506	1	MRPL41	1.13502
C4orf3	0.0733601	0.113315	0.729	0.616	1	C4orf3	1.13454
CCAR1	0.0734188	0.145426	0.276	0.189	1	CCAR1	1.13419
RBM7	0.073602	0.162921	0.206	0.128	1	RBM7	1.13311
ITK	0.0737847	-0.21047	0.259	0.329	1	ITK	1.13203
NUBP1	0.0741599	-0.1719	0.088	0.146	1	NUBP1	1.12983
DENND6A	0.074342	-0.118662	0.065	0.122	1	DENND6A	1.12877
FCMR	0.0744115	0.144048	0.265	0.177	1	FCMR	1.12836
BCL11B	0.0744811	-0.14105	0.382	0.457	1	BCL11B	1.12795
MIIP	0.0747508	0.0936487	0.153	0.085	1	MIIP	1.12638
MXD4	0.0748233	0.0959089	0.594	0.47	1	MXD4	1.12596
TMCO1	0.0748717	0.083756	0.529	0.384	1	TMCO1	1.12568
ACTR3	0.0753851	-0.148942	0.694	0.707	1	ACTR3	1.12271
HMGN3	0.0756078	-0.126547	0.318	0.409	1	HMGN3	1.12143
PTAR1	0.0756214	-0.174515	0.124	0.189	1	PTAR1	1.12136
PSPC1	0.0756471	0.0941953	0.182	0.11	1	PSPC1	1.12121
SHMT2	0.075694	-0.131485	0.053	0.104	1	SHMT2	1.12094
RBBP6	0.0759962	-0.205606	0.253	0.329	1	RBBP6	1.11921
DENND1B	0.0760113	0.1168	0.218	0.134	1	DENND1B	1.11912
AC016831.7	0.076245	0.1522	0.171	0.104	1	AC016831.7	1.11779
FAM13B	0.0763557	0.118393	0.235	0.152	1	FAM13B	1.11716
UBE2L6	0.0763958	0.0779681	0.518	0.36	1	UBE2L6	1.11693
SLC25A36	0.0765592	0.132461	0.171	0.104	1	SLC25A36	1.116
NBL1	0.0765798	-0.16983	0.076	0.134	1	NBL1	1.11589
CCDC59	0.0771026	-0.17468	0.218	0.293	1	CCDC59	1.11293
DAZAP2	0.0772275	0.0958396	0.576	0.445	1	DAZAP2	1.11223
TFIP11	0.077316	-0.146292	0.053	0.104	1	TFIP11	1.11173
EIF2B4	0.0774804	0.110522	0.118	0.061	1	EIF2B4	1.11081
RNF34	0.0780029	-0.17312	0.159	0.232	1	RNF34	1.10789
LINC02084	0.0781056	0.13027	0.182	0.11	1	LINC02084	1.10732
BRIX1	0.0781169	0.113447	0.194	0.122	1	BRIX1	1.10725
HBS1L	0.0782035	0.101796	0.206	0.128	1	HBS1L	1.10677
OAT	0.0783701	0.121747	0.124	0.067	1	OAT	1.10585
MCUB	0.0784703	0.181057	0.394	0.305	1	MCUB	1.10529
RPL17	0.0785307	0.132724	0.418	0.311	1	RPL17	1.10496
LSP1	0.0787396	-0.142355	0.676	0.689	1	LSP1	1.10381
DHX16	0.078747	0.168156	0.124	0.067	1	DHX16	1.10377
ALG6	0.0790025	0.114007	0.106	0.055	1	ALG6	1.10236
UBA6	0.079025	0.127943	0.194	0.122	1	UBA6	1.10224
UBR2	0.0791191	0.0876137	0.282	0.183	1	UBR2	1.10172
EXOSC7	0.079267	0.127339	0.176	0.11	1	EXOSC7	1.10091
ZNF143	0.0795841	0.163751	0.147	0.085	1	ZNF143	1.09917
C16orf87	0.0798371	-0.154328	0.082	0.14	1	C16orf87	1.0978
SLC9A9	0.0799336	0.126164	0.147	0.085	1	SLC9A9	1.09727
ZEB2	0.0802897	0.183331	0.276	0.195	1	ZEB2	1.09534
DHFR	0.0803372	0.0515185	0.112	0.055	1	DHFR	1.09508
FBXL12	0.0806004	0.08692	0.118	0.061	1	FBXL12	1.09366
RBPJ	0.0806198	-0.199467	0.265	0.335	1	RBPJ	1.09356
COX19	0.0807013	0.102821	0.224	0.146	1	COX19	1.09312
ELMSAN1	0.0809182	0.181371	0.2	0.128	1	ELMSAN1	1.09195
ISCA1	0.0809293	0.125214	0.218	0.14	1	ISCA1	1.09189
VPS13A	0.0809382	0.138579	0.271	0.183	1	VPS13A	1.09185
SLC2A3	0.0809697	0.12318	0.265	0.177	1	SLC2A3	1.09168
NDRG1	0.0810398	0.126053	0.124	0.067	1	NDRG1	1.0913
ABHD14B	0.0810539	0.121072	0.229	0.146	1	ABHD14B	1.09123
OLA1	0.0813722	0.166718	0.212	0.146	1	OLA1	1.08952
TSNAX	0.081439	0.15505	0.206	0.134	1	TSNAX	1.08917
TTC9C	0.0814611	-0.155459	0.082	0.14	1	TTC9C	1.08905
CDCA4	0.0816778	-0.129161	0.076	0.134	1	CDCA4	1.0879
NUDT3	0.0816778	-0.136663	0.076	0.134	1	NUDT3	1.0879
PAK2	0.0819305	-0.188222	0.482	0.549	1	PAK2	1.08655
FANCF	0.0822526	0.0959796	0.188	0.116	1	FANCF	1.08485
TOB1	0.0827304	0.118578	0.171	0.104	1	TOB1	1.08233
PIK3R1	0.0828245	0.14982	0.565	0.47	1	PIK3R1	1.08184
FASLG	0.0829262	-0.1496	0.324	0.402	1	FASLG	1.08131
HLA-DPB1	0.0831614	-0.132987	0.853	0.848	1	HLA-DPB1	1.08008
ZNHIT1	0.0832163	0.135034	0.476	0.372	1	ZNHIT1	1.07979
DTYMK	0.0834028	0.130596	0.171	0.104	1	DTYMK	1.07882
NPAT	0.0837328	0.156161	0.206	0.134	1	NPAT	1.0771
RCN2	0.083739	0.14291	0.359	0.268	1	RCN2	1.07707
PPFIA1	0.083798	0.140443	0.153	0.091	1	PPFIA1	1.07677
IL27RA	0.084123	-0.149463	0.235	0.317	1	IL27RA	1.07509
FIP1L1	0.0843458	-0.172622	0.2	0.268	1	FIP1L1	1.07394
AKAP11	0.084557	0.154373	0.129	0.073	1	AKAP11	1.07285
SNX3	0.0847918	-0.206231	0.418	0.427	1	SNX3	1.07165
STOML2	0.0849249	0.189055	0.335	0.244	1	STOML2	1.07097
RPL23	0.0849315	-0.0981559	0.853	0.878	1	RPL23	1.07093
SFXN3	0.0852634	-0.147025	0.065	0.116	1	SFXN3	1.06924
LINC02001	0.0854109	-0.10057	0.053	0.104	1	LINC02001	1.06849
NFATC2	0.0855934	-0.170564	0.288	0.36	1	NFATC2	1.06756
DNAJB1	0.0856612	0.126544	0.241	0.159	1	DNAJB1	1.06722
RPL13A	0.0859327	-0.069576	1	1	1	RPL13A	1.06584
RPS28	0.0860359	0.081596	0.994	0.976	1	RPS28	1.06532
BCOR	0.0860673	-0.136542	0.088	0.146	1	BCOR	1.06516
PPIL4	0.0861107	0.0737531	0.288	0.195	1	PPIL4	1.06494
TGFB1	0.0866159	-0.182681	0.412	0.451	1	TGFB1	1.0624
KIAA1109	0.0866781	0.199177	0.229	0.159	1	KIAA1109	1.06209
METTL17	0.0866896	-0.177901	0.1	0.159	1	METTL17	1.06203
KCTD20	0.0868957	-0.141955	0.124	0.189	1	KCTD20	1.061
FYTTD1	0.0874699	0.116647	0.229	0.146	1	FYTTD1	1.05814
ABCB7	0.0875177	-0.122805	0.059	0.11	1	ABCB7	1.0579
STAT1	0.0877161	0.205554	0.394	0.299	1	STAT1	1.05692
PYURF	0.0878811	0.0870732	0.471	0.335	1	PYURF	1.0561
ACTA2	0.0881207	0.125484	0.129	0.073	1	ACTA2	1.05492
LINC00987	0.0881701	0.0637535	0.176	0.104	1	LINC00987	1.05468
ADD3	0.0882175	-0.121996	0.224	0.305	1	ADD3	1.05445
ZADH2	0.0882272	-0.129777	0.082	0.14	1	ZADH2	1.0544
NAE1	0.0882838	-0.15683	0.224	0.299	1	NAE1	1.05412
SFPQ	0.0883103	0.109826	0.653	0.53	1	SFPQ	1.05399
ANKRD12	0.0883291	-0.124602	0.818	0.805	1	ANKRD12	1.0539
METTL26	0.0883598	0.169891	0.482	0.378	1	METTL26	1.05375
GMCL1	0.0884336	-0.141807	0.135	0.201	1	GMCL1	1.05338
SND1	0.0885241	0.126429	0.129	0.073	1	SND1	1.05294
UCP2	0.0885716	0.152136	0.488	0.378	1	UCP2	1.05271
PPM1A	0.0886782	0.162482	0.159	0.098	1	PPM1A	1.05218
YPEL5	0.0890896	0.18721	0.288	0.207	1	YPEL5	1.05017
RPL22	0.0893695	0.0766811	0.947	0.933	1	RPL22	1.04881
KDM6A	0.0894944	0.0935239	0.124	0.067	1	KDM6A	1.0482
EAPP	0.0894996	-0.232837	0.276	0.335	1	EAPP	1.04818
AC004951.1	0.089993	0.110266	0.112	0.061	1	AC004951.1	1.04579
AKT3	0.0901723	-0.129625	0.059	0.11	1	AKT3	1.04493
LCORL	0.0903353	0.107347	0.124	0.067	1	LCORL	1.04414
WBP4	0.0906218	0.105625	0.147	0.085	1	WBP4	1.04277
ITFG1	0.0906856	-0.139855	0.118	0.177	1	ITFG1	1.04246
GFPT1	0.0910714	-0.141696	0.059	0.11	1	GFPT1	1.04062
KIAA1551	0.0911747	0.117934	0.924	0.835	1	KIAA1551	1.04013
DCTN2	0.0913359	-0.152856	0.212	0.274	1	DCTN2	1.03936
COASY	0.0916708	-0.149424	0.065	0.116	1	COASY	1.03777
IDS	0.0918895	-0.191354	0.476	0.506	1	IDS	1.03673
SRGN	0.0921919	-0.0997831	0.941	0.951	1	SRGN	1.03531
OGDH	0.0922214	0.142183	0.129	0.073	1	OGDH	1.03517
ATP6V1F	0.0929391	0.122086	0.565	0.445	1	ATP6V1F	1.0318
RBM5	0.09294	0.0874333	0.365	0.25	1	RBM5	1.0318
CIZ1	0.0934433	-0.164288	0.065	0.116	1	CIZ1	1.02945
FOXK1	0.09347	0.0973145	0.106	0.055	1	FOXK1	1.02933
RAB11FIP1	0.0934723	0.123298	0.153	0.091	1	RAB11FIP1	1.02932
YIF1A	0.0935254	-0.214414	0.206	0.262	1	YIF1A	1.02907
AC008105.3	0.0935498	-0.119175	0.218	0.299	1	AC008105.3	1.02896
HPS1	0.093797	0.0726026	0.141	0.079	1	HPS1	1.02781
ACAT1	0.0938907	-0.154461	0.065	0.116	1	ACAT1	1.02738
PPP2R3C	0.0939272	-0.183353	0.176	0.238	1	PPP2R3C	1.02721
RPL8	0.0939836	0.0846172	1	0.994	1	RPL8	1.02695
KLF3	0.0941633	0.117176	0.147	0.085	1	KLF3	1.02612
MBNL2	0.0944803	-0.138559	0.106	0.165	1	MBNL2	1.02466
CHRAC1	0.0945636	0.0927075	0.147	0.085	1	CHRAC1	1.02428
LYAR	0.0947444	0.0935066	0.659	0.567	1	LYAR	1.02345
MAPRE1	0.0949203	-0.14707	0.218	0.293	1	MAPRE1	1.02264
TMX4	0.0952231	0.175735	0.371	0.28	1	TMX4	1.02126
PVT1	0.0955748	-0.124996	0.112	0.177	1	PVT1	1.01966
PDRG1	0.0956974	-0.123419	0.065	0.116	1	PDRG1	1.0191
ZNF720	0.0958756	-0.141163	0.159	0.226	1	ZNF720	1.01829
NUDT14	0.0961783	0.113572	0.147	0.085	1	NUDT14	1.01692
SYT11	0.0962246	0.102818	0.153	0.091	1	SYT11	1.01671
ALG2	0.0963158	0.096884	0.106	0.055	1	ALG2	1.0163
SMYD2	0.0963241	0.111231	0.112	0.061	1	SMYD2	1.01626
ALDH9A1	0.0965442	-0.19278	0.188	0.244	1	ALDH9A1	1.01527
CDC37	0.0966728	0.115698	0.447	0.323	1	CDC37	1.0147
RACK1	0.0971401	0.0804301	0.994	0.994	1	RACK1	1.0126
TPD52	0.097294	0.0920353	0.124	0.067	1	TPD52	1.01191
TTC37	0.0977627	0.14883	0.212	0.14	1	TTC37	1.00983
LAPTM4A	0.0977696	0.0892431	0.312	0.226	1	LAPTM4A	1.0098
LINC00324	0.0980071	0.129008	0.182	0.116	1	LINC00324	1.00874
ATP5PO	0.0980731	0.0916047	0.582	0.439	1	ATP5PO	1.00845
IER2	0.0981938	0.191249	0.6	0.512	1	IER2	1.00792
CSNK1E	0.0984596	-0.174328	0.065	0.116	1	CSNK1E	1.00674
ZNF217	0.0986547	0.148102	0.312	0.226	1	ZNF217	1.00588
NDUFB4	0.0986886	0.13213	0.541	0.433	1	NDUFB4	1.00573
PHAX	0.0989695	0.117335	0.335	0.25	1	PHAX	1.0045
UBE2M	0.0991503	0.116729	0.471	0.36	1	UBE2M	1.00371
SLC25A5	0.0995343	0.111735	0.671	0.53	1	SLC25A5	1.00203
ICE1	0.0995611	0.164325	0.265	0.183	1	ICE1	1.00191
DYRK4	0.0997231	0.107029	0.106	0.055	1	DYRK4	1.0012
FYCO1	0.0997231	0.0799501	0.106	0.055	1	FYCO1	1.0012
MCL1	0.0997567	0.0796677	0.653	0.543	1	MCL1	1.00106
USP3	0.0998283	0.149543	0.288	0.207	1	USP3	1.00075
CLINT1	0.0998815	0.0726267	0.288	0.195	1	CLINT1	1.00052
FAM3C	0.100075	0.11229	0.188	0.116	1	FAM3C	0.999675
FAM136A	0.100079	-0.168817	0.135	0.195	1	FAM136A	0.999655
HTRA2	0.100099	0.102704	0.112	0.061	1	HTRA2	0.99957
SMAD4	0.100127	0.100605	0.171	0.104	1	SMAD4	0.999448
SLC16A4	0.100218	0.0825766	0.106	0.055	1	SLC16A4	0.999056
PLEKHO2	0.100272	-0.152345	0.082	0.134	1	PLEKHO2	0.998821
TMEM9B	0.100419	0.105829	0.394	0.28	1	TMEM9B	0.998183
MIER1	0.10046	-0.182372	0.4	0.463	1	MIER1	0.998005
IL7R	0.100552	0.292495	0.318	0.244	1	IL7R	0.997609
ZNF426	0.100579	0.0809464	0.112	0.061	1	ZNF426	0.997493
SHPRH	0.100865	0.103775	0.271	0.189	1	SHPRH	0.996262
LCP2	0.101204	0.149594	0.488	0.39	1	LCP2	0.994804
YWHAE	0.101488	0.13505	0.429	0.335	1	YWHAE	0.993583
NDUFB6	0.101512	0.109479	0.312	0.22	1	NDUFB6	0.993482
CTNNBL1	0.101628	0.0903954	0.253	0.165	1	CTNNBL1	0.992987
PTPN4	0.101678	-0.221397	0.312	0.366	1	PTPN4	0.992773
LBH	0.101992	0.0945656	0.547	0.451	1	LBH	0.991434
CAMLG	0.102123	0.118344	0.365	0.274	1	CAMLG	0.990877
ZNF75A	0.102329	0.116427	0.341	0.244	1	ZNF75A	0.990003
VPS4B	0.102333	0.0991583	0.406	0.299	1	VPS4B	0.989983
HLA-C	0.10239	-0.0576511	1	1	1	HLA-C	0.989742
HK1	0.102456	0.125084	0.2	0.128	1	HK1	0.989462
SIRT2	0.102801	0.141519	0.2	0.134	1	SIRT2	0.988004
TEFM	0.102922	0.1058	0.182	0.116	1	TEFM	0.987494
ISG15	0.103133	0.127005	0.682	0.604	1	ISG15	0.986602
TRAPPC1	0.103198	-0.158159	0.612	0.634	1	TRAPPC1	0.98633
GTF2B	0.103967	0.104874	0.335	0.25	1	GTF2B	0.983104
SRSF4	0.104284	-0.206384	0.412	0.451	1	SRSF4	0.981782
UBXN7	0.104551	0.139606	0.141	0.085	1	UBXN7	0.980671
CCNL2	0.104593	-0.144261	0.165	0.232	1	CCNL2	0.980498
SNAP47	0.105053	-0.135147	0.147	0.213	1	SNAP47	0.978591
PLSCR1	0.105066	0.0911301	0.2	0.128	1	PLSCR1	0.978539
STX12	0.105224	0.0647795	0.188	0.116	1	STX12	0.977887
UFSP2	0.105457	0.104531	0.147	0.085	1	UFSP2	0.976924
SYTL3	0.105665	0.13895	0.259	0.183	1	SYTL3	0.976067
C19orf24	0.106043	0.117772	0.406	0.305	1	C19orf24	0.974519
44083	0.106535	-0.181224	0.535	0.561	1	44083	0.97251
PEPD	0.106572	-0.150828	0.129	0.189	1	PEPD	0.972357
CAMK2G	0.106664	0.131414	0.118	0.067	1	CAMK2G	0.971982
CYB5B	0.106771	0.114906	0.282	0.195	1	CYB5B	0.971546
HERPUD2	0.106834	0.143784	0.176	0.116	1	HERPUD2	0.971292
BRD9	0.106997	-0.135878	0.1	0.159	1	BRD9	0.970627
C12orf45	0.107086	-0.140542	0.076	0.128	1	C12orf45	0.970268
YY1AP1	0.107432	-0.134734	0.082	0.134	1	YY1AP1	0.968868
EMC6	0.107476	-0.169319	0.341	0.402	1	EMC6	0.96869
CEP350	0.1075	0.172966	0.4	0.317	1	CEP350	0.96859
TRBC2	0.107709	-0.168815	0.871	0.866	1	TRBC2	0.967748
ANAPC16	0.107794	-0.0862092	0.659	0.677	1	ANAPC16	0.967406
ATG2A	0.108339	-0.147291	0.088	0.14	1	ATG2A	0.965214
SERINC3	0.10834	0.127581	0.312	0.226	1	SERINC3	0.965211
CAMK4	0.108685	-0.162396	0.241	0.311	1	CAMK4	0.96383
RAP2B	0.108704	0.0705674	0.159	0.098	1	RAP2B	0.963754
TMEM123	0.108837	0.179354	0.224	0.152	1	TMEM123	0.963222
CLEC2B	0.108869	0.114349	0.859	0.744	1	CLEC2B	0.963098
VEZT	0.108981	-0.10641	0.076	0.128	1	VEZT	0.96265
SERP1	0.10899	0.10926	0.653	0.537	1	SERP1	0.962612
JUNB	0.109191	0.0953879	0.482	0.378	1	JUNB	0.961815
TRAPPC10	0.109297	0.107946	0.382	0.28	1	TRAPPC10	0.961392
GIMAP5	0.109373	0.128543	0.306	0.22	1	GIMAP5	0.961091
ADK	0.109452	0.0975665	0.147	0.085	1	ADK	0.960776
CCDC88B	0.109563	0.118153	0.235	0.159	1	CCDC88B	0.960335
FBXO6	0.109903	0.0607527	0.147	0.085	1	FBXO6	0.958989
NSMAF	0.109984	0.104946	0.135	0.079	1	NSMAF	0.958669
CREB1	0.110339	-0.127274	0.259	0.341	1	CREB1	0.95727
ARHGEF3	0.110691	-0.132691	0.165	0.226	1	ARHGEF3	0.955886
PSME3	0.111137	0.123306	0.118	0.067	1	PSME3	0.954143
PIK3CD	0.111235	0.0809617	0.282	0.201	1	PIK3CD	0.953758
CRNKL1	0.111304	0.130029	0.159	0.098	1	CRNKL1	0.953489
BECN1	0.111477	0.102025	0.182	0.116	1	BECN1	0.952813
ELAVL1	0.112057	-0.155524	0.153	0.213	1	ELAVL1	0.950562
GOLGA1	0.11214	-0.130159	0.059	0.104	1	GOLGA1	0.950239
SDF4	0.112321	0.144035	0.218	0.152	1	SDF4	0.949539
KLF10	0.112361	-0.128992	0.076	0.128	1	KLF10	0.949384
EIF3B	0.112405	0.0692406	0.365	0.268	1	EIF3B	0.949212
SELENOS	0.112719	-0.128357	0.288	0.36	1	SELENOS	0.948002
ARID4A	0.113777	-0.1763	0.218	0.28	1	ARID4A	0.943946
NFE2L2	0.113808	-0.144258	0.182	0.244	1	NFE2L2	0.943826
CTBP1	0.113953	0.100141	0.159	0.098	1	CTBP1	0.943274
FUOM	0.114039	0.0998716	0.176	0.11	1	FUOM	0.942946
LRRC59	0.114399	0.10639	0.159	0.098	1	LRRC59	0.941576
MSL1	0.114399	-0.115286	0.1	0.159	1	MSL1	0.941576
QDPR	0.114717	0.0826821	0.118	0.067	1	QDPR	0.940374
KMT2D	0.114748	0.098756	0.135	0.079	1	KMT2D	0.940254
TMEM179B	0.115037	0.122527	0.312	0.226	1	TMEM179B	0.939162
ORC3	0.115151	-0.139968	0.059	0.104	1	ORC3	0.938733
HPS3	0.115295	-0.160065	0.118	0.177	1	HPS3	0.938188
GIPC1	0.115321	0.101879	0.176	0.11	1	GIPC1	0.938092
GTF2H3	0.115428	-0.129847	0.059	0.104	1	GTF2H3	0.93769
PRNP	0.115983	-0.1198	0.059	0.104	1	PRNP	0.935606
TTC39C	0.116243	0.136694	0.453	0.348	1	TTC39C	0.934632
GMEB1	0.116279	0.0723222	0.182	0.116	1	GMEB1	0.934498
NDUFS3	0.116385	-0.140295	0.229	0.293	1	NDUFS3	0.934101
MTDH	0.11644	0.0945245	0.7	0.579	1	MTDH	0.933898
TUBA1B	0.116569	0.15422	0.488	0.384	1	TUBA1B	0.933418
SNRPN	0.116703	-0.19768	0.335	0.396	1	SNRPN	0.932918
LEMD3	0.116752	0.0915428	0.124	0.073	1	LEMD3	0.932737
PACS1	0.117008	-0.124805	0.129	0.189	1	PACS1	0.931785
ZRANB2	0.117114	-0.173221	0.406	0.451	1	ZRANB2	0.931392
ANAPC4	0.117329	0.0949806	0.118	0.067	1	ANAPC4	0.930595
IL12RB1	0.117842	0.0610681	0.188	0.116	1	IL12RB1	0.9287
CASP1	0.117866	-0.16023	0.306	0.366	1	CASP1	0.928611
CBLL1	0.118049	0.0994637	0.153	0.091	1	CBLL1	0.927939
NBAS	0.118406	0.0989149	0.141	0.085	1	NBAS	0.926627
AC090152.1	0.118417	0.095515	0.182	0.116	1	AC090152.1	0.926587
SCAMP1	0.118426	-0.125469	0.082	0.134	1	SCAMP1	0.926552
CSNK1A1	0.118686	0.0937825	0.571	0.445	1	CSNK1A1	0.925601
MAPK1	0.119001	0.11653	0.318	0.226	1	MAPK1	0.924449
POU3F1	0.119074	-0.112601	0.059	0.104	1	POU3F1	0.924183
SCAND1	0.119201	-0.163855	0.424	0.482	1	SCAND1	0.923719
CEMIP2	0.119622	0.141666	0.312	0.226	1	CEMIP2	0.922188
ANK3	0.119698	0.0255769	0.212	0.14	1	ANK3	0.921912
VAV1	0.119829	0.117153	0.176	0.116	1	VAV1	0.921438
ME2	0.119858	-0.0967857	0.147	0.22	1	ME2	0.921332
MSANTD4	0.119988	0.124972	0.118	0.067	1	MSANTD4	0.920864
NUDT1	0.120351	-0.132558	0.276	0.341	1	NUDT1	0.919551
LARP7	0.120652	0.109355	0.376	0.299	1	LARP7	0.918465
OXR1	0.120892	0.104484	0.124	0.073	1	OXR1	0.917603
TRAC	0.120989	-0.124243	0.976	0.988	1	TRAC	0.917252
PLA2G16	0.121089	0.117422	0.406	0.317	1	PLA2G16	0.916896
NME6	0.121435	-0.12311	0.082	0.134	1	NME6	0.915656
POP7	0.121494	0.0761798	0.159	0.098	1	POP7	0.915445
UBL3	0.121518	-0.206502	0.2	0.256	1	UBL3	0.91536
ERH	0.121598	0.106804	0.582	0.463	1	ERH	0.915075
TSPYL2	0.121605	0.11746	0.118	0.067	1	TSPYL2	0.915047
TRPM7	0.121775	-0.163236	0.135	0.189	1	TRPM7	0.914443
DHPS	0.122112	0.0768181	0.318	0.226	1	DHPS	0.913243
COX5B	0.122419	0.104213	0.776	0.652	1	COX5B	0.912152
RAB27A	0.122426	0.145863	0.612	0.524	1	RAB27A	0.912126
DDX54	0.122527	0.081699	0.165	0.104	1	DDX54	0.911767
SYTL2	0.122573	0.0747707	0.176	0.11	1	SYTL2	0.911605
KAT6B	0.122832	0.106546	0.141	0.085	1	KAT6B	0.91069
EIF3L	0.123188	0.113816	0.4	0.317	1	EIF3L	0.909433
COPS9	0.123419	0.0529525	0.618	0.47	1	COPS9	0.908617
TMEM203	0.123512	-0.0991431	0.182	0.256	1	TMEM203	0.908292
FOXO3	0.123577	-0.145884	0.065	0.11	1	FOXO3	0.908063
ATP2A3	0.12392	0.0969793	0.194	0.128	1	ATP2A3	0.906858
UBE3C	0.124071	0.105858	0.124	0.073	1	UBE3C	0.906328
SMARCB1	0.124114	0.0926085	0.253	0.171	1	SMARCB1	0.906178
SCAMP4	0.124712	0.0431841	0.112	0.061	1	SCAMP4	0.90409
POGLUT1	0.124847	-0.148385	0.094	0.146	1	POGLUT1	0.903622
COPA	0.12493	0.107862	0.229	0.159	1	COPA	0.903333
GPSM3	0.125102	0.0512661	0.712	0.64	1	GPSM3	0.902734
RPS23	0.125261	0.0633859	1	1	1	RPS23	0.902184
PEX13	0.125415	0.0891283	0.124	0.073	1	PEX13	0.901649
BAZ2A	0.12543	0.0812712	0.271	0.189	1	BAZ2A	0.901598
AKR7A2	0.125477	0.102829	0.247	0.177	1	AKR7A2	0.901437
FAM76A	0.125581	0.131386	0.106	0.061	1	FAM76A	0.901076
UBR3	0.125746	-0.107547	0.059	0.104	1	UBR3	0.900506
SPN	0.125749	-0.171397	0.365	0.421	1	SPN	0.900497
AL662844.4	0.126003	-0.170428	0.071	0.116	1	AL662844.4	0.89962
TMED7	0.126022	0.115908	0.153	0.098	1	TMED7	0.899554
SH3GLB2	0.126289	-0.12835	0.112	0.171	1	SH3GLB2	0.898633
PMPCB	0.126545	0.0881448	0.188	0.122	1	PMPCB	0.897756
HMOX2	0.126721	0.0994197	0.388	0.287	1	HMOX2	0.897151
CNN2	0.127137	0.0793229	0.4	0.305	1	CNN2	0.895727
MRPL18	0.127177	-0.162091	0.229	0.293	1	MRPL18	0.895592
PPP2R5A	0.127238	0.0716413	0.218	0.146	1	PPP2R5A	0.895384
SYS1	0.127371	0.0856331	0.176	0.11	1	SYS1	0.894931
RYR1	0.127386	0.093247	0.141	0.085	1	RYR1	0.894879
PPP1R9B	0.127533	-0.100126	0.059	0.104	1	PPP1R9B	0.894376
NBR1	0.127839	0.109345	0.235	0.171	1	NBR1	0.893336
COA1	0.127937	0.135228	0.553	0.463	1	COA1	0.893003
NACA	0.128076	0.0637725	0.988	0.97	1	NACA	0.892532
EMC2	0.128159	0.0987613	0.171	0.11	1	EMC2	0.892249
KPNA1	0.128247	0.0719328	0.118	0.067	1	KPNA1	0.891951
MED21	0.128694	0.106118	0.129	0.079	1	MED21	0.890442
ZBTB40	0.128751	-0.132817	0.065	0.11	1	ZBTB40	0.890248
ATP5F1B	0.129112	-0.108177	0.482	0.524	1	ATP5F1B	0.889034
MIEF1	0.129381	-0.139483	0.071	0.116	1	MIEF1	0.888128
IKZF1	0.129533	-0.117982	0.759	0.787	1	IKZF1	0.887619
DYNLL1	0.129811	-0.133507	0.788	0.787	1	DYNLL1	0.886689
JMY	0.129951	-0.17084	0.071	0.116	1	JMY	0.88622
GIT2	0.130327	0.109155	0.288	0.213	1	GIT2	0.884967
CCDC142	0.130556	-0.111947	0.059	0.104	1	CCDC142	0.884202
PTGDR	0.13095	0.123652	0.176	0.116	1	PTGDR	0.882893
DICER1	0.131449	-0.145251	0.176	0.238	1	DICER1	0.881244
MON2	0.131527	0.075706	0.188	0.122	1	MON2	0.880987
RAB5C	0.131653	-0.127988	0.276	0.348	1	RAB5C	0.880569
DMAC1	0.131761	0.133241	0.2	0.14	1	DMAC1	0.880214
TMEM245	0.132083	0.11741	0.182	0.122	1	TMEM245	0.879155
PMEPA1	0.132339	-0.209069	0.141	0.189	1	PMEPA1	0.878313
TTC19	0.13254	-0.137993	0.282	0.341	1	TTC19	0.877654
UHRF2	0.132729	-0.0861839	0.076	0.128	1	UHRF2	0.877034
PRF1	0.132963	0.0919149	0.629	0.549	1	PRF1	0.876268
CELF2	0.132987	0.111583	0.535	0.445	1	CELF2	0.87619
DNMT1	0.132988	0.140992	0.412	0.329	1	DNMT1	0.876186
DNAJC9	0.133244	0.0780998	0.2	0.128	1	DNAJC9	0.875354
RNF167	0.133397	0.122782	0.388	0.293	1	RNF167	0.874854
ADSS	0.133416	0.128436	0.288	0.207	1	ADSS	0.874791
CASP8	0.133557	0.117877	0.447	0.341	1	CASP8	0.874332
CD99	0.133777	0.0600711	0.8	0.726	1	CD99	0.873618
CWC25	0.134235	0.0892372	0.247	0.171	1	CWC25	0.872133
ZNHIT6	0.134483	-0.155802	0.112	0.165	1	ZNHIT6	0.871331
DDB2	0.134527	0.104418	0.218	0.146	1	DDB2	0.871189
SUCLG2	0.135021	0.0859988	0.165	0.104	1	SUCLG2	0.869598
CLK3	0.135093	0.0745782	0.194	0.128	1	CLK3	0.869366
R3HCC1L	0.135144	0.0944602	0.124	0.073	1	R3HCC1L	0.869205
TP53TG1	0.135606	-0.113515	0.065	0.11	1	TP53TG1	0.86772
TBL1XR1	0.135691	-0.117596	0.347	0.415	1	TBL1XR1	0.86745
AC005332.5	0.135717	0.0957692	0.124	0.073	1	AC005332.5	0.867367
NCOR1	0.135943	-0.188044	0.612	0.616	1	NCOR1	0.866642
PAIP2	0.136078	0.0760525	0.606	0.482	1	PAIP2	0.866212
CYB561D2	0.136285	0.124727	0.265	0.189	1	CYB561D2	0.865552
PRKAR1A	0.136353	0.0373042	0.341	0.238	1	PRKAR1A	0.865335
C6orf106	0.136405	0.124039	0.106	0.061	1	C6orf106	0.865169
METTL2B	0.136882	0.0894282	0.147	0.091	1	METTL2B	0.863655
IRF7	0.137057	0.0750881	0.229	0.159	1	IRF7	0.863098
PARP14	0.137231	-0.0837118	0.465	0.512	1	PARP14	0.862548
MCMBP	0.137447	0.0755055	0.124	0.073	1	MCMBP	0.861865
RNF126	0.13762	-0.138124	0.141	0.201	1	RNF126	0.861318
SH3GLB1	0.137853	-0.16146	0.424	0.488	1	SH3GLB1	0.860583
PRPS1	0.1379	0.102319	0.176	0.116	1	PRPS1	0.860436
EIF2AK1	0.137902	-0.173577	0.153	0.207	1	EIF2AK1	0.860429
ANGEL2	0.138248	-0.0879654	0.088	0.14	1	ANGEL2	0.85934
SMC3	0.138593	0.0987115	0.535	0.415	1	SMC3	0.858257
TOR3A	0.13861	0.0789232	0.124	0.073	1	TOR3A	0.858206
ZNF92	0.138769	0.145963	0.2	0.14	1	ZNF92	0.857706
SAMD3	0.138786	0.135982	0.588	0.482	1	SAMD3	0.857654
PRDX1	0.13882	-0.113184	0.6	0.598	1	PRDX1	0.857549
KIAA1586	0.138906	0.09794	0.106	0.061	1	KIAA1586	0.85728
PCNA	0.139333	0.0887433	0.171	0.11	1	PCNA	0.855947
MAPRE2	0.139375	0.0936894	0.2	0.134	1	MAPRE2	0.855817
CHCHD2	0.139378	0.0826619	0.935	0.878	1	CHCHD2	0.855804
ID2	0.139407	0.117712	0.447	0.354	1	ID2	0.855716
PSMA2	0.139513	0.108989	0.371	0.293	1	PSMA2	0.855385
APTX	0.139536	0.105388	0.106	0.061	1	APTX	0.855312
CCDC47	0.139556	0.112953	0.176	0.122	1	CCDC47	0.855251
BRD7	0.139585	0.0586559	0.376	0.274	1	BRD7	0.855161
EXOC3	0.13978	-0.11709	0.076	0.122	1	EXOC3	0.854554
NEK7	0.139978	-0.178609	0.206	0.25	1	NEK7	0.853942
AKAP7	0.140369	0.0726447	0.124	0.073	1	AKAP7	0.85273
PSMF1	0.140385	0.085627	0.253	0.183	1	PSMF1	0.85268
PSENEN	0.14039	0.0910516	0.241	0.165	1	PSENEN	0.852663
ARPC3	0.140865	0.0785773	0.965	0.915	1	ARPC3	0.851196
SNTB2	0.14103	0.142046	0.176	0.122	1	SNTB2	0.850689
PRKAG1	0.141203	-0.14073	0.135	0.189	1	PRKAG1	0.850155
PPM1B	0.141232	0.134332	0.188	0.128	1	PPM1B	0.850066
TPM4	0.1413	0.0653362	0.453	0.348	1	TPM4	0.849859
ZNF264	0.141517	-0.145799	0.112	0.165	1	ZNF264	0.849191
GLRX5	0.141717	0.157713	0.347	0.287	1	GLRX5	0.848577
RB1	0.141898	-0.11452	0.082	0.134	1	RB1	0.848024
DCAF5	0.141936	-0.107149	0.106	0.159	1	DCAF5	0.847907
KRTCAP2	0.14231	-0.169467	0.335	0.39	1	KRTCAP2	0.846764
THADA	0.142493	-0.162361	0.1	0.146	1	THADA	0.846207
IRF9	0.142533	0.117361	0.247	0.183	1	IRF9	0.846086
NAT9	0.14274	0.0717445	0.124	0.073	1	NAT9	0.845454
RPL26L1	0.142878	0.0869462	0.171	0.11	1	RPL26L1	0.845034
IMP3	0.143126	0.133153	0.465	0.378	1	IMP3	0.84428
SERINC1	0.143143	-0.162289	0.141	0.195	1	SERINC1	0.844231
RTF2	0.143178	0.095039	0.418	0.317	1	RTF2	0.844123
GTF2A2	0.143454	0.0827597	0.5	0.372	1	GTF2A2	0.843288
PHF19	0.144146	0.0881926	0.188	0.128	1	PHF19	0.841197
TMEM260	0.144221	-0.124297	0.071	0.116	1	TMEM260	0.840973
XRCC6	0.144416	0.125664	0.565	0.457	1	XRCC6	0.840385
BTBD6	0.144473	0.0862118	0.253	0.177	1	BTBD6	0.840212
FKBP4	0.144527	0.0790041	0.153	0.098	1	FKBP4	0.84005
SHOC2	0.144628	0.146949	0.2	0.14	1	SHOC2	0.839747
UBE2W	0.144661	0.11527	0.106	0.061	1	UBE2W	0.839649
CALM3	0.144726	0.0916504	0.576	0.482	1	CALM3	0.839453
TRIM27	0.145216	-0.1257	0.159	0.213	1	TRIM27	0.837987
SORL1	0.145311	-0.138957	0.135	0.189	1	SORL1	0.8377
NDFIP2	0.145462	0.0441011	0.118	0.067	1	NDFIP2	0.837251
RALGAPA1	0.145572	0.0940529	0.276	0.195	1	RALGAPA1	0.836922
SYNGR2	0.145748	-0.160894	0.076	0.122	1	SYNGR2	0.836399
ATP2B1	0.146194	0.117965	0.135	0.085	1	ATP2B1	0.835069
HLA-A	0.146497	-0.0440649	1	1	1	HLA-A	0.83417
TUBA1C	0.146611	0.0969009	0.182	0.122	1	TUBA1C	0.833834
CEP295	0.146619	0.0731668	0.106	0.061	1	CEP295	0.833809
PTPRJ	0.146918	0.10562	0.176	0.116	1	PTPRJ	0.832924
IFNAR2	0.146976	0.0576805	0.159	0.104	1	IFNAR2	0.832755
EBPL	0.147254	0.0928526	0.153	0.098	1	EBPL	0.831932
SNRPG	0.147374	-0.0902912	0.529	0.561	1	SNRPG	0.83158
CDK5RAP2	0.147398	0.139878	0.194	0.134	1	CDK5RAP2	0.831507
FBXO22	0.147686	-0.18163	0.176	0.232	1	FBXO22	0.830661
MYSM1	0.147809	-0.0462311	0.188	0.268	1	MYSM1	0.830299
DNPH1	0.147842	-0.100014	0.371	0.445	1	DNPH1	0.830203
KRR1	0.14787	0.110808	0.329	0.25	1	KRR1	0.830118
MAPK14	0.147935	-0.128954	0.088	0.134	1	MAPK14	0.829929
LIMK1	0.14796	0.105771	0.129	0.079	1	LIMK1	0.829855
HIVEP3	0.14796	0.0712829	0.129	0.079	1	HIVEP3	0.829855
NOL7	0.148127	-0.146892	0.424	0.457	1	NOL7	0.829367
PMS1	0.148188	0.0737216	0.124	0.073	1	PMS1	0.829186
PCBD1	0.148519	0.100043	0.135	0.085	1	PCBD1	0.828219
NCOA2	0.148559	-0.134254	0.082	0.128	1	NCOA2	0.828102
PUF60	0.148596	-0.152043	0.312	0.372	1	PUF60	0.827992
PINX1.1	0.148598	0.0750572	0.106	0.061	1	PINX1.1	0.827988
PSMA7	0.14868	0.0671604	0.947	0.854	1	PSMA7	0.827747
ELOC	0.14873	0.0884995	0.365	0.268	1	ELOC	0.827601
SAMM50	0.148982	0.102591	0.176	0.116	1	SAMM50	0.826865
NDUFA2	0.149008	-0.124542	0.412	0.463	1	NDUFA2	0.826789
TMEM242	0.149159	0.0849633	0.129	0.079	1	TMEM242	0.826351
CUTA	0.149292	-0.146838	0.471	0.494	1	CUTA	0.825963
CLNS1A	0.149332	0.0741334	0.318	0.226	1	CLNS1A	0.825846
SMIM37	0.149356	0.0772186	0.188	0.128	1	SMIM37	0.825778
TPST2	0.1494	0.0646341	0.276	0.189	1	TPST2	0.825649
MKLN1	0.149511	0.0721146	0.194	0.128	1	MKLN1	0.825328
ARPP19	0.149618	-0.121386	0.253	0.323	1	ARPP19	0.825017
BCL2A1	0.149875	-0.0902466	0.059	0.104	1	BCL2A1	0.824271
C1orf131	0.150011	-0.13414	0.182	0.244	1	C1orf131	0.823878
ARMC8	0.150011	0.0758712	0.194	0.128	1	ARMC8	0.823878
IGSF8	0.150039	0.0889187	0.124	0.073	1	IGSF8	0.823795
FAM208B	0.150125	0.0964092	0.218	0.152	1	FAM208B	0.823547
ARL6IP5	0.150198	-0.107668	0.835	0.799	1	ARL6IP5	0.823337
TXNDC17	0.150347	-0.0878094	0.318	0.384	1	TXNDC17	0.822906
KDM3B	0.150365	0.0888093	0.129	0.079	1	KDM3B	0.822854
LAMTOR3	0.150434	-0.106316	0.112	0.165	1	LAMTOR3	0.822653
43896	0.150614	0.0616461	0.224	0.152	1	43896	0.822135
ZDHHC12	0.15066	0.074373	0.276	0.201	1	ZDHHC12	0.822001
RSL1D1	0.150755	0.0707808	0.424	0.329	1	RSL1D1	0.821729
CALHM2	0.15097	0.0943294	0.129	0.079	1	CALHM2	0.821108
PBRM1	0.15101	0.12947	0.288	0.22	1	PBRM1	0.820995
NFATC2IP	0.151118	-0.165089	0.206	0.256	1	NFATC2IP	0.820682
CERS2	0.151361	-0.0960326	0.135	0.195	1	CERS2	0.819987
ENOSF1	0.151463	-0.130248	0.088	0.134	1	ENOSF1	0.819693
SNX18	0.151597	0.0931839	0.241	0.171	1	SNX18	0.81931
ZMAT3	0.151792	-0.101981	0.071	0.116	1	ZMAT3	0.818752
TSEN54	0.152274	0.0684613	0.347	0.25	1	TSEN54	0.817374
SBDS	0.152477	0.0852678	0.312	0.226	1	SBDS	0.816795
PECAM1	0.152642	0.13496	0.229	0.171	1	PECAM1	0.816325
SMAP1	0.152643	0.123337	0.282	0.22	1	SMAP1	0.816323
MACO1	0.152722	0.140348	0.124	0.079	1	MACO1	0.816099
BRD2	0.152745	0.0571269	0.482	0.384	1	BRD2	0.816034
NSF	0.153013	0.0811626	0.182	0.122	1	NSF	0.815271
USP7	0.153058	0.0501369	0.324	0.232	1	USP7	0.815143
LSM6	0.153105	0.0868709	0.494	0.372	1	LSM6	0.815012
TENT2	0.153258	0.091194	0.159	0.104	1	TENT2	0.814578
GIGYF1	0.153412	-0.148031	0.082	0.128	1	GIGYF1	0.814141
FAM50A	0.153678	0.138297	0.4	0.317	1	FAM50A	0.813388
PRRC1	0.153794	0.0681712	0.124	0.073	1	PRRC1	0.813061
CSNK1G2	0.154167	0.103181	0.365	0.287	1	CSNK1G2	0.812007
MRPS21	0.154187	-0.200034	0.347	0.384	1	MRPS21	0.811951
DEGS1	0.154282	0.0846519	0.288	0.207	1	DEGS1	0.811685
ZNF429	0.154427	-0.0919623	0.076	0.122	1	ZNF429	0.811278
GALT	0.154452	-0.121534	0.088	0.134	1	GALT	0.811207
OXSR1	0.154644	0.0781683	0.129	0.079	1	OXSR1	0.810668
CCNY	0.154835	-0.112108	0.124	0.177	1	CCNY	0.81013
LINC00513	0.155034	-0.0996609	0.071	0.116	1	LINC00513	0.809573
ACTR1A	0.155051	0.121376	0.165	0.11	1	ACTR1A	0.809526
C8orf76	0.1551	-0.118672	0.124	0.177	1	C8orf76	0.809387
MLLT3	0.155206	-0.203123	0.288	0.348	1	MLLT3	0.809093
TIGIT	0.155212	0.151685	0.735	0.659	1	TIGIT	0.809076
RAB21	0.155449	-0.186123	0.218	0.262	1	RAB21	0.808411
THOC1	0.155561	0.0608633	0.171	0.11	1	THOC1	0.8081
TPRKB	0.155718	0.113641	0.206	0.146	1	TPRKB	0.807661
GGNBP2	0.155904	0.127259	0.412	0.317	1	GGNBP2	0.807143
EEF1A1	0.156188	0.0475454	1	1	1	EEF1A1	0.806353
PITPNM1	0.156337	0.0576815	0.124	0.073	1	PITPNM1	0.80594
C16orf91	0.156693	-0.148069	0.112	0.159	1	C16orf91	0.804949
CKAP2	0.156855	-0.162797	0.188	0.238	1	CKAP2	0.8045
RNF125	0.156866	0.120568	0.218	0.152	1	RNF125	0.804471
ILF2	0.157067	-0.150169	0.294	0.348	1	ILF2	0.803916
PRKCSH	0.157204	0.0818978	0.171	0.11	1	PRKCSH	0.803535
SAMHD1	0.157392	0.128643	0.471	0.366	1	SAMHD1	0.803017
ACSL5	0.157755	-0.157941	0.118	0.165	1	ACSL5	0.802016
ZDHHC20	0.157833	0.0810112	0.112	0.067	1	ZDHHC20	0.801802
CD69	0.157926	0.0334603	0.388	0.305	1	CD69	0.801546
TERF2IP	0.158047	0.104004	0.671	0.555	1	TERF2IP	0.801213
GOLGB1	0.15835	0.098099	0.453	0.366	1	GOLGB1	0.800382
ITFG2	0.158472	0.0583064	0.235	0.159	1	ITFG2	0.800046
RNF40	0.158711	0.0778987	0.135	0.085	1	RNF40	0.799392
MT-ND6	0.158744	0.118859	0.529	0.457	1	MT-ND6	0.799302
EIF2B5	0.158864	0.122112	0.147	0.098	1	EIF2B5	0.798974
ZNF101	0.158884	-0.159068	0.335	0.384	1	ZNF101	0.798919
TCIRG1	0.158954	0.0883497	0.247	0.177	1	TCIRG1	0.798727
NR2C1	0.159182	0.104086	0.112	0.067	1	NR2C1	0.798105
ERN1	0.159182	0.101415	0.112	0.067	1	ERN1	0.798105
PDCD5	0.159208	0.0919803	0.447	0.341	1	PDCD5	0.798036
CSTB	0.159311	-0.12804	0.629	0.701	1	CSTB	0.797753
EIF1	0.159524	-0.0599215	1	0.994	1	EIF1	0.797174
SRP72	0.15964	-0.163098	0.294	0.341	1	SRP72	0.796858
H2AFY	0.159901	0.157893	0.347	0.274	1	H2AFY	0.796148
TRAF1	0.159907	0.0119563	0.259	0.177	1	TRAF1	0.796132
WDR1	0.160098	0.148801	0.382	0.311	1	WDR1	0.795615
ZBTB43	0.160281	0.0754788	0.129	0.079	1	ZBTB43	0.795118
SAYSD1	0.160307	0.0455304	0.153	0.098	1	SAYSD1	0.795047
MCRIP1	0.160657	-0.12693	0.241	0.305	1	MCRIP1	0.7941
UTP6	0.160746	0.123652	0.206	0.146	1	UTP6	0.793861
GIMAP4	0.161217	0.0931995	0.882	0.884	1	GIMAP4	0.792588
DGKA	0.161383	-0.142102	0.194	0.25	1	DGKA	0.792143
POLDIP2	0.161605	0.0655942	0.106	0.061	1	POLDIP2	0.791545
YEATS4	0.162194	-0.105273	0.082	0.128	1	YEATS4	0.789965
HAVCR2	0.162194	-0.17851	0.082	0.128	1	HAVCR2	0.789965
CDC16	0.162293	0.107293	0.141	0.091	1	CDC16	0.789701
RFC4	0.162323	0.10273	0.118	0.073	1	RFC4	0.78962
MEF2A	0.162433	0.0749176	0.135	0.085	1	MEF2A	0.789327
NOP58	0.162445	-0.156155	0.306	0.378	1	NOP58	0.789292
APH1A	0.162863	-0.133631	0.188	0.244	1	APH1A	0.788178
ZNF33B	0.162942	0.0999273	0.176	0.116	1	ZNF33B	0.787967
PTRH1	0.162991	0.115297	0.118	0.073	1	PTRH1	0.787836
IL4R	0.163479	-0.102386	0.082	0.128	1	IL4R	0.786539
OTUD4	0.163764	0.132063	0.176	0.122	1	OTUD4	0.785782
RPS11	0.163768	0.0653503	0.994	0.976	1	RPS11	0.78577
PNN	0.163902	-0.10697	0.688	0.701	1	PNN	0.785417
COMT	0.163971	-0.126569	0.235	0.293	1	COMT	0.785234
DENND2D	0.163991	0.0957839	0.541	0.433	1	DENND2D	0.785179
TMEM170A	0.164483	0.153761	0.194	0.14	1	TMEM170A	0.783879
ISCU	0.164683	-0.141883	0.5	0.518	1	ISCU	0.783352
CASP2	0.164772	0.0618096	0.129	0.079	1	CASP2	0.783118
TARDBP	0.165066	-0.156804	0.141	0.189	1	TARDBP	0.782343
ST8SIA1	0.165236	0.0910219	0.241	0.177	1	ST8SIA1	0.781896
RELB	0.165304	0.0549283	0.188	0.128	1	RELB	0.781718
HSD17B11	0.165304	0.0424969	0.188	0.128	1	HSD17B11	0.781718
TMEM101	0.165346	-0.1191	0.129	0.177	1	TMEM101	0.781605
PDCL3	0.165965	0.0667352	0.247	0.171	1	PDCL3	0.779984
GBF1	0.166061	0.0853454	0.112	0.067	1	GBF1	0.779732
ZNRD1	0.16619	0.170831	0.418	0.354	1	ZNRD1	0.779395
NIFK-AS1	0.166392	-0.177581	0.135	0.183	1	NIFK-AS1	0.778866
ENO2	0.166411	-0.149685	0.071	0.11	1	ENO2	0.778819
TBC1D1	0.166416	-0.134894	0.153	0.201	1	TBC1D1	0.778804
CNPY3	0.166762	0.074962	0.276	0.201	1	CNPY3	0.777902
METTL18	0.166826	-0.0840905	0.076	0.122	1	METTL18	0.777736
RPP25L	0.166851	0.060502	0.153	0.098	1	RPP25L	0.777671
C1orf123	0.166974	0.0934484	0.153	0.104	1	C1orf123	0.777351
HIKESHI	0.167159	-0.172239	0.224	0.268	1	HIKESHI	0.77687
ICOS	0.16732	0.136019	0.159	0.104	1	ICOS	0.776453
P2RY8	0.167498	0.10645	0.165	0.11	1	P2RY8	0.775992
NRAS	0.167861	0.0947245	0.141	0.091	1	NRAS	0.77505
ANKFY1	0.168137	0.0627955	0.135	0.085	1	ANKFY1	0.774336
SLC25A46	0.168168	0.0756091	0.112	0.067	1	SLC25A46	0.774258
NCBP2-AS2	0.168404	0.0581345	0.182	0.122	1	NCBP2-AS2	0.773648
IFNG-AS1	0.168412	0.0844388	0.118	0.073	1	IFNG-AS1	0.773627
TOX4	0.168507	-0.152231	0.259	0.311	1	TOX4	0.773382
DOHH	0.169228	-0.155654	0.071	0.11	1	DOHH	0.771527
NAA10	0.169379	-0.182983	0.259	0.305	1	NAA10	0.771141
MLH3	0.169425	0.0653042	0.135	0.085	1	MLH3	0.771022
ZNF708	0.169544	-0.183288	0.159	0.207	1	ZNF708	0.770718
JMJD1C	0.169756	0.142779	0.288	0.213	1	JMJD1C	0.770174
DESI1	0.169928	0.112589	0.176	0.122	1	DESI1	0.769735
GPATCH4	0.16997	-0.161191	0.147	0.195	1	GPATCH4	0.769627
TMEM199	0.170253	0.050756	0.106	0.061	1	TMEM199	0.768906
FAHD2A	0.170253	0.0453513	0.106	0.061	1	FAHD2A	0.768906
VGLL4	0.170382	0.100142	0.141	0.091	1	VGLL4	0.768577
INPPL1	0.170479	0.0968366	0.118	0.073	1	INPPL1	0.768328
PELO	0.170756	-0.176734	0.188	0.238	1	PELO	0.767623
EBNA1BP2	0.170873	0.096863	0.171	0.116	1	EBNA1BP2	0.767326
FEZ2	0.171016	0.0850146	0.141	0.091	1	FEZ2	0.766963
43897	0.171362	0.0859557	0.312	0.244	1	43897	0.766087
LFNG	0.171371	-0.125302	0.088	0.134	1	LFNG	0.766063
STX4	0.171593	0.110103	0.265	0.207	1	STX4	0.7655
EIF4G2	0.171683	0.0914872	0.582	0.476	1	EIF4G2	0.765272
RIPK1	0.17201	-0.155653	0.124	0.171	1	RIPK1	0.764447
USP25	0.172398	0.100456	0.194	0.134	1	USP25	0.763469
RBM8A	0.172455	0.100913	0.629	0.53	1	RBM8A	0.763325
AGFG1	0.172589	0.0833168	0.176	0.116	1	AGFG1	0.762988
ROCK1	0.173096	0.131458	0.582	0.482	1	ROCK1	0.761714
DUT	0.173425	0.153119	0.329	0.262	1	DUT	0.760888
ARHGAP4	0.173552	0.118722	0.335	0.262	1	ARHGAP4	0.76057
P4HB	0.173558	-0.109788	0.365	0.427	1	P4HB	0.760555
PPP3CB	0.17415	0.109896	0.135	0.091	1	PPP3CB	0.759076
UGGT1	0.174339	-0.0733122	0.076	0.122	1	UGGT1	0.758605
MGA	0.174375	0.117321	0.206	0.14	1	MGA	0.758515
UGCG	0.174551	0.0924959	0.159	0.104	1	UGCG	0.758078
WDR26	0.174654	-0.111357	0.165	0.22	1	WDR26	0.75782
GALNT1	0.174661	-0.151712	0.218	0.274	1	GALNT1	0.757805
NEMF	0.17537	-0.0927451	0.329	0.372	1	NEMF	0.756045
JAGN1	0.175374	0.0640505	0.294	0.207	1	JAGN1	0.756036
LDHA	0.175686	-0.158169	0.824	0.848	1	LDHA	0.755264
NFYC	0.176085	0.0815038	0.118	0.073	1	NFYC	0.754277
CCDC124	0.176264	0.110112	0.176	0.122	1	CCDC124	0.753836
TBPL1	0.176265	-0.182899	0.171	0.22	1	TBPL1	0.753833
NPEPPS	0.176522	-0.172359	0.159	0.201	1	NPEPPS	0.753202
NDUFC2	0.1767	-0.129168	0.6	0.61	1	NDUFC2	0.752763
MTMR9	0.177007	0.0945014	0.188	0.128	1	MTMR9	0.752009
CSNK1D	0.177095	0.0556013	0.259	0.183	1	CSNK1D	0.751793
ACAA1	0.177188	0.0818005	0.235	0.171	1	ACAA1	0.751566
CALCOCO1	0.177258	-0.124468	0.1	0.146	1	CALCOCO1	0.751393
CCS	0.177274	0.0196309	0.176	0.116	1	CCS	0.751356
ACSS1	0.177341	-0.101961	0.065	0.104	1	ACSS1	0.751192
WDR54	0.177649	0.155719	0.259	0.201	1	WDR54	0.750436
ZC3H7A	0.177706	0.0961098	0.235	0.171	1	ZC3H7A	0.750298
TMC6	0.177961	-0.135357	0.365	0.409	1	TMC6	0.749676
AC016831.5	0.177966	0.123433	0.165	0.116	1	AC016831.5	0.749663
ENY2	0.177982	-0.110856	0.324	0.384	1	ENY2	0.749624
MRPL14	0.178074	0.0634837	0.335	0.244	1	MRPL14	0.7494
NUDC	0.178074	0.117419	0.435	0.372	1	NUDC	0.7494
UHMK1	0.178092	0.118458	0.247	0.183	1	UHMK1	0.749355
TMX2	0.178219	-0.115941	0.147	0.201	1	TMX2	0.749046
VPS26A	0.178294	0.105859	0.218	0.159	1	VPS26A	0.748863
PKN1	0.178478	0.124304	0.394	0.323	1	PKN1	0.748415
RPS4X	0.178658	0.0570295	1	1	1	RPS4X	0.747978
IFT80	0.178939	0.0861247	0.118	0.073	1	IFT80	0.747295
MPG	0.178962	0.0362177	0.382	0.287	1	MPG	0.74724
ETHE1	0.179046	0.0955669	0.159	0.11	1	ETHE1	0.747036
TRIM13	0.17963	-0.102933	0.188	0.25	1	TRIM13	0.745621
TSR2	0.179784	-0.127553	0.118	0.165	1	TSR2	0.745248
FAM96B	0.180249	0.070178	0.576	0.457	1	FAM96B	0.744127
CAPN15	0.181159	-0.107908	0.065	0.104	1	CAPN15	0.741941
NDUFS8	0.181444	0.111603	0.453	0.402	1	NDUFS8	0.741257
NUCB1	0.182002	0.119539	0.259	0.195	1	NUCB1	0.739924
MRPS30	0.182155	0.119887	0.159	0.11	1	MRPS30	0.739559
NDUFB7	0.182682	0.100379	0.547	0.482	1	NDUFB7	0.738305
MYO5A	0.182898	0.138675	0.129	0.085	1	MYO5A	0.737792
RAN	0.183243	0.0584839	0.818	0.701	1	RAN	0.736973
DPH5	0.183284	0.0664339	0.118	0.073	1	DPH5	0.736875
RAB8A	0.183484	-0.131354	0.447	0.488	1	RAB8A	0.736402
HIGD2A	0.183604	0.111963	0.624	0.549	1	HIGD2A	0.736119
RPL9	0.184775	0.0274886	1	1	1	RPL9	0.733357
MRPL28	0.185326	-0.0810999	0.259	0.317	1	MRPL28	0.732064
ABRAXAS2	0.185486	0.0777766	0.118	0.073	1	ABRAXAS2	0.731689
RAPGEF6	0.185486	0.0625631	0.118	0.073	1	RAPGEF6	0.731689
YY1	0.186506	0.131378	0.447	0.39	1	YY1	0.729307
ARHGDIA	0.186891	-0.159504	0.547	0.561	1	ARHGDIA	0.728413
C12orf65	0.187404	-0.186751	0.253	0.299	1	C12orf65	0.72722
CCND2	0.187521	0.0485313	0.524	0.402	1	CCND2	0.72695
SPPL2A	0.187645	0.0812343	0.312	0.238	1	SPPL2A	0.726662
ARFIP2	0.187654	-0.105749	0.071	0.11	1	ARFIP2	0.726643
CSTF3	0.18779	0.0981771	0.129	0.085	1	CSTF3	0.726328
FAM104B	0.18779	0.0901009	0.129	0.085	1	FAM104B	0.726328
MALAT1	0.187796	-0.0480355	1	1	1	MALAT1	0.726314
NDUFAF8	0.18782	-0.130897	0.312	0.348	1	NDUFAF8	0.726257
BAD	0.188253	-0.104165	0.106	0.152	1	BAD	0.725259
KLHL9	0.188493	-0.116181	0.112	0.159	1	KLHL9	0.724704
CXCR4	0.188511	-0.0828169	0.588	0.646	1	CXCR4	0.724663
PRDX6	0.189014	-0.122564	0.424	0.463	1	PRDX6	0.723507
RPL10	0.18932	0.0361169	1	1	1	RPL10	0.722804
TMEM18	0.189564	-0.134676	0.106	0.152	1	TMEM18	0.722244
VASP	0.189592	0.0699841	0.4	0.317	1	VASP	0.72218
AZIN1	0.189723	0.0869526	0.182	0.128	1	AZIN1	0.72188
RAB5IF	0.189974	-0.146857	0.271	0.311	1	RAB5IF	0.721306
GNB5	0.190063	0.079059	0.218	0.152	1	GNB5	0.721101
ZNF32	0.19019	0.0897129	0.194	0.14	1	ZNF32	0.720812
NUTM2B-AS1	0.190219	-0.15012	0.353	0.378	1	NUTM2B-AS1	0.720746
DSTN	0.190278	0.0618945	0.253	0.183	1	DSTN	0.720612
SEC61G	0.190371	0.0864709	0.624	0.512	1	SEC61G	0.7204
RAB11B	0.190447	0.0733901	0.194	0.134	1	RAB11B	0.720225
OCIAD1	0.190516	0.0400173	0.476	0.366	1	OCIAD1	0.720068
ITGA4	0.190676	-0.212369	0.324	0.378	1	ITGA4	0.719703
RSU1	0.190698	0.0799954	0.176	0.122	1	RSU1	0.719653
OST4	0.190811	0.0492322	0.871	0.848	1	OST4	0.719396
CHMP2A	0.190825	-0.101147	0.512	0.549	1	CHMP2A	0.719365
LINC00909	0.190884	-0.11916	0.094	0.14	1	LINC00909	0.71923
PFDN4	0.19141	0.122102	0.224	0.165	1	PFDN4	0.718035
CD37	0.191413	-0.120038	0.7	0.695	1	CD37	0.718029
PSME1	0.191465	0.0717575	0.906	0.823	1	PSME1	0.71791
FBXO28	0.191899	0.0133149	0.112	0.067	1	FBXO28	0.716927
SLC7A6OS	0.191998	0.0671368	0.212	0.152	1	SLC7A6OS	0.716704
SMAD2	0.191998	-0.148453	0.159	0.207	1	SMAD2	0.716704
SLC25A38	0.192542	0.135402	0.176	0.128	1	SLC25A38	0.715474
FDFT1	0.192542	0.067779	0.182	0.122	1	FDFT1	0.715474
FAM76B	0.192679	0.119954	0.147	0.104	1	FAM76B	0.715167
RNF44	0.193026	0.0962333	0.159	0.11	1	RNF44	0.714384
BCCIP	0.193026	-0.107981	0.112	0.159	1	BCCIP	0.714384
MIDN	0.193489	-0.112841	0.306	0.378	1	MIDN	0.713343
DPH3	0.193646	0.0621361	0.159	0.104	1	DPH3	0.712991
TAGLN2	0.193915	0.127546	0.459	0.39	1	TAGLN2	0.712388
CERS5	0.194221	0.0792366	0.129	0.085	1	CERS5	0.711705
DPM1	0.194877	0.100422	0.153	0.104	1	DPM1	0.71024
ZNF678	0.194894	0.111702	0.106	0.067	1	ZNF678	0.710201
EIF3K	0.19503	-0.0944647	0.812	0.799	1	EIF3K	0.709898
XRCC5	0.195678	0.117852	0.659	0.585	1	XRCC5	0.708459
GPATCH2L	0.196017	0.116499	0.324	0.256	1	GPATCH2L	0.707706
HEATR1	0.1964	0.0882658	0.129	0.085	1	HEATR1	0.706859
MIB2	0.196452	-0.127417	0.153	0.201	1	MIB2	0.706744
C12orf10	0.196623	0.0801656	0.212	0.152	1	C12orf10	0.706366
GTF2I	0.196879	0.0726692	0.453	0.366	1	GTF2I	0.7058
COA3	0.196912	0.146577	0.224	0.171	1	COA3	0.705727
CTR9	0.197157	0.109125	0.241	0.177	1	CTR9	0.705189
ZNF33A	0.197172	0.0854949	0.265	0.195	1	ZNF33A	0.705156
LLPH	0.197372	0.056481	0.265	0.189	1	LLPH	0.704714
RIF1	0.197424	0.102506	0.382	0.299	1	RIF1	0.7046
CHI3L2	0.197638	0.120776	0.159	0.11	1	CHI3L2	0.704129
DAXX	0.197677	0.0538628	0.288	0.213	1	DAXX	0.704044
ARFRP1	0.197792	0.10733	0.212	0.152	1	ARFRP1	0.703792
DNAJC24	0.197862	-0.118558	0.088	0.128	1	DNAJC24	0.703637
DNAJC17	0.197949	0.071873	0.124	0.079	1	DNAJC17	0.703447
MRPL3	0.198089	-0.13891	0.153	0.195	1	MRPL3	0.703141
SSR2	0.198411	-0.0500609	0.741	0.774	1	SSR2	0.702435
HOPX	0.198454	0.152809	0.282	0.22	1	HOPX	0.702339
GRK2	0.198555	-0.160889	0.471	0.494	1	GRK2	0.702118
NT5C3B	0.198921	0.115639	0.106	0.067	1	NT5C3B	0.701319
C17orf67	0.198932	0.0274145	0.135	0.085	1	C17orf67	0.701295
FNBP1	0.199149	0.14455	0.571	0.494	1	FNBP1	0.700823
RMND5A	0.199397	-0.0685609	0.071	0.11	1	RMND5A	0.700281
NMRK1	0.199442	0.113777	0.259	0.189	1	NMRK1	0.700184
DCAF15	0.199508	-0.0863342	0.065	0.104	1	DCAF15	0.700039
GRWD1	0.199508	-0.088386	0.065	0.104	1	GRWD1	0.700039
ITGA1	0.19963	-0.0978818	0.518	0.579	1	ITGA1	0.699775
LTB	0.199732	-0.0113833	0.835	0.872	1	LTB	0.699552
PPP2R5C	0.199765	0.130885	0.712	0.665	1	PPP2R5C	0.699481
RPL13	0.199846	0.0408761	1	1	1	RPL13	0.699304
EXOG	0.199927	-0.158469	0.135	0.177	1	EXOG	0.699128
S1PR4	0.200277	0.012812	0.529	0.427	1	S1PR4	0.698369
PCYT1A	0.200298	-0.0964559	0.106	0.152	1	PCYT1A	0.698324
PSMD7	0.200581	0.0745223	0.371	0.299	1	PSMD7	0.697709
DGLUCY	0.200994	0.0649601	0.229	0.171	1	DGLUCY	0.696817
UBL7-AS1	0.201003	-0.138176	0.071	0.11	1	UBL7-AS1	0.696798
GMFG	0.201213	0.11596	0.894	0.823	1	GMFG	0.696344
NBPF19	0.201357	-0.131393	0.082	0.122	1	NBPF19	0.696034
PRPF8	0.201918	-0.189402	0.306	0.335	1	PRPF8	0.694825
CLIC3	0.202043	-0.125277	0.365	0.415	1	CLIC3	0.694557
TNIP3	0.202086	0.0796346	0.335	0.256	1	TNIP3	0.694463
MALT1	0.202143	0.0638776	0.182	0.128	1	MALT1	0.694342
CCDC22	0.202618	-0.0904446	0.071	0.11	1	CCDC22	0.693322
FBRS	0.202622	-0.111444	0.129	0.177	1	FBRS	0.693314
PTTG1	0.202644	0.134392	0.335	0.274	1	PTTG1	0.693266
ATF1	0.203044	0.0940963	0.129	0.085	1	ATF1	0.692409
TTPAL	0.203045	0.0874644	0.129	0.085	1	TTPAL	0.692409
BCLAF1	0.203062	0.113509	0.435	0.354	1	BCLAF1	0.692371
RPLP0	0.203191	0.088155	0.953	0.921	1	RPLP0	0.692096
SMC1A	0.203901	-0.100062	0.341	0.39	1	SMC1A	0.69058
METTL9	0.204001	0.0821476	0.359	0.287	1	METTL9	0.690368
RICTOR	0.204106	0.127611	0.341	0.274	1	RICTOR	0.690144
ARCN1	0.204204	0.0706525	0.271	0.195	1	ARCN1	0.689935
PPIE	0.204242	-0.0996312	0.153	0.201	1	PPIE	0.689855
CLTC	0.204387	0.11036	0.288	0.226	1	CLTC	0.689547
NDUFB1	0.204643	0.0700792	0.371	0.299	1	NDUFB1	0.689002
FGFR1OP2	0.204688	-0.190153	0.406	0.421	1	FGFR1OP2	0.688908
GANAB	0.2049	0.07531	0.147	0.098	1	GANAB	0.688457
GOLPH3	0.2049	0.0654301	0.147	0.098	1	GOLPH3	0.688457
CCNT2	0.205017	0.081016	0.182	0.128	1	CCNT2	0.68821
CDK11B	0.205232	0.113384	0.241	0.183	1	CDK11B	0.687756
TMEM251	0.205345	0.101661	0.135	0.091	1	TMEM251	0.687516
CALCOCO2	0.205977	0.0975313	0.382	0.305	1	CALCOCO2	0.686182
POM121	0.206081	0.0811011	0.135	0.091	1	POM121	0.685961
MAN1A2	0.206109	0.100919	0.276	0.213	1	MAN1A2	0.685902
CBX6	0.206277	-0.117419	0.241	0.293	1	CBX6	0.685549
TUBD1	0.206354	0.0551693	0.124	0.079	1	TUBD1	0.685388
SLC16A7	0.206354	-0.163629	0.229	0.274	1	SLC16A7	0.685387
TSN	0.206364	0.0655602	0.194	0.134	1	TSN	0.685365
NDUFA1	0.206674	-0.0859698	0.541	0.585	1	NDUFA1	0.684714
DENND1C	0.206806	0.0746283	0.129	0.085	1	DENND1C	0.684437
BABAM2	0.207227	0.0751415	0.153	0.104	1	BABAM2	0.683553
SAFB	0.207387	0.071363	0.359	0.274	1	SAFB	0.683218
HCG18	0.207455	-0.153394	0.212	0.262	1	HCG18	0.683076
ZNF701	0.20754	-0.15223	0.1	0.14	1	ZNF701	0.682898
CYTH4	0.207858	-0.108644	0.218	0.28	1	CYTH4	0.682233
ARF6	0.207887	0.0960283	0.676	0.604	1	ARF6	0.682173
ZSCAN16-AS1	0.207931	-0.141794	0.094	0.134	1	ZSCAN16-AS1	0.68208
RPLP2	0.20812	0.0413825	0.994	0.994	1	RPLP2	0.681687
GINM1	0.208299	0.0606124	0.124	0.079	1	GINM1	0.681312
SEC63	0.20848	0.0706409	0.194	0.14	1	SEC63	0.680936
MR1	0.208626	-0.111365	0.135	0.183	1	MR1	0.680631
SVIP	0.208704	0.0984125	0.324	0.25	1	SVIP	0.680469
PCMTD1	0.208814	-0.163086	0.224	0.268	1	PCMTD1	0.68024
CLOCK	0.209081	-0.104476	0.082	0.122	1	CLOCK	0.679685
DIDO1	0.209086	0.0954063	0.276	0.213	1	DIDO1	0.679675
BTG2	0.209093	0.134005	0.406	0.323	1	BTG2	0.67966
ITGAE	0.209112	0.0983865	0.388	0.299	1	ITGAE	0.679622
RPL32	0.209145	0.061356	1	1	1	RPL32	0.679552
RPS29	0.209351	0.0376119	1	0.994	1	RPS29	0.679125
ELMOD2	0.209605	-0.0738859	0.065	0.104	1	ELMOD2	0.678599
ATG3	0.20967	0.0966791	0.235	0.177	1	ATG3	0.678465
EP300	0.209675	-0.184256	0.194	0.238	1	EP300	0.678453
EEF2	0.210004	0.112463	0.794	0.72	1	EEF2	0.677773
ZNF766	0.210012	0.11418	0.2	0.146	1	ZNF766	0.677756
HLTF	0.210048	0.0792295	0.153	0.104	1	HLTF	0.677682
NUMB	0.210563	-0.0968048	0.112	0.159	1	NUMB	0.676618
HNRNPDL	0.210955	0.144446	0.6	0.53	1	HNRNPDL	0.67581
CARS	0.211182	0.0640707	0.182	0.128	1	CARS	0.675342
WIPI2	0.211378	-0.149196	0.2	0.25	1	WIPI2	0.67494
MTMR6	0.211386	0.0709253	0.129	0.085	1	MTMR6	0.674923
TPP1	0.211662	-0.151175	0.2	0.25	1	TPP1	0.674358
PSMG4	0.211772	0.140234	0.188	0.14	1	PSMG4	0.674132
ZBTB37	0.212094	0.0924311	0.147	0.098	1	ZBTB37	0.673471
PRKAR2A	0.212206	0.0579006	0.2	0.146	1	PRKAR2A	0.673242
CSNK1G1	0.212216	0.104045	0.106	0.067	1	CSNK1G1	0.673223
DDIT4	0.212292	0.109146	0.388	0.335	1	DDIT4	0.673066
DALRD3	0.21264	0.113882	0.112	0.073	1	DALRD3	0.672354
FBXL15	0.213057	-0.13057	0.212	0.256	1	FBXL15	0.671504
BTN3A2	0.213085	-0.150019	0.471	0.512	1	BTN3A2	0.671447
PIP4K2A	0.213193	-0.130213	0.406	0.421	1	PIP4K2A	0.671227
C6orf47	0.21336	0.0844084	0.159	0.11	1	C6orf47	0.670886
SLBP	0.213672	-0.0831291	0.2	0.256	1	SLBP	0.670253
RPS15	0.213702	0.0334258	1	1	1	RPS15	0.670192
NORAD	0.213887	0.0688041	0.194	0.14	1	NORAD	0.669816
SYNM	0.213921	0.0770346	0.106	0.067	1	SYNM	0.669746
IL17RA	0.213932	-0.119135	0.094	0.134	1	IL17RA	0.669725
LMAN2	0.213993	-0.0890218	0.482	0.518	1	LMAN2	0.669601
NUDT22	0.214019	0.0898691	0.294	0.226	1	NUDT22	0.669547
CCNG1	0.214092	-0.147569	0.088	0.128	1	CCNG1	0.6694
GRSF1	0.214415	0.101991	0.176	0.128	1	GRSF1	0.668746
RTRAF	0.214443	-0.107134	0.571	0.543	1	RTRAF	0.668689
MRPL47	0.215296	0.0333289	0.347	0.25	1	MRPL47	0.666964
UBL5	0.215303	-0.047702	0.812	0.811	1	UBL5	0.666949
NOC3L	0.215451	-0.143033	0.094	0.134	1	NOC3L	0.666651
TSSC4	0.215513	0.024665	0.335	0.244	1	TSSC4	0.666527
FAM120AOS	0.215603	-0.115875	0.118	0.165	1	FAM120AOS	0.666346
SRRD	0.215637	0.0860378	0.106	0.067	1	SRRD	0.666276
MYADM	0.215785	-0.119013	0.224	0.274	1	MYADM	0.665978
YARS	0.215891	-0.113321	0.171	0.22	1	YARS	0.665766
APOBEC3H	0.215954	-0.140023	0.2	0.256	1	APOBEC3H	0.665638
GGCT	0.216277	-0.122027	0.118	0.159	1	GGCT	0.66499
KLHDC3	0.216299	0.0954711	0.165	0.116	1	KLHDC3	0.664946
WBP2	0.216366	0.0800965	0.271	0.201	1	WBP2	0.664811
LINC00667	0.216427	-0.15943	0.135	0.171	1	LINC00667	0.664688
SUMO2	0.216484	-0.0983113	0.906	0.86	1	SUMO2	0.664575
NIPBL	0.216578	0.0898704	0.435	0.348	1	NIPBL	0.664386
SRSF11	0.216644	-0.112571	0.488	0.47	1	SRSF11	0.664254
MRGBP	0.216978	-0.108562	0.094	0.134	1	MRGBP	0.663583
DNAJC7	0.217315	0.0946444	0.441	0.348	1	DNAJC7	0.662911
LRPAP1	0.217465	0.0739367	0.429	0.341	1	LRPAP1	0.662611
MIA2	0.21768	0.0926151	0.241	0.183	1	MIA2	0.662181
CXorf38	0.218569	-0.103405	0.188	0.238	1	CXorf38	0.660412
COX20	0.218662	0.0558534	0.288	0.22	1	COX20	0.660227
JOSD2	0.218781	0.110328	0.212	0.165	1	JOSD2	0.65999
PPTC7	0.218788	-0.115945	0.088	0.128	1	PPTC7	0.659977
SAMD4B	0.219101	0.0403671	0.165	0.11	1	SAMD4B	0.659355
PHKG2	0.219132	-0.116067	0.129	0.177	1	PHKG2	0.659295
RFTN1	0.219432	-0.131444	0.182	0.232	1	RFTN1	0.6587
ZNF511	0.219777	0.0604405	0.265	0.207	1	ZNF511	0.658017
FAM98A	0.219806	0.107136	0.118	0.079	1	FAM98A	0.657959
IFIH1	0.220137	-0.0752498	0.106	0.152	1	IFIH1	0.657308
WRAP73	0.220217	0.108042	0.147	0.104	1	WRAP73	0.657149
BTN2A1	0.220219	0.109092	0.118	0.079	1	BTN2A1	0.657146
NIPA2	0.220653	-0.149884	0.165	0.213	1	NIPA2	0.65629
ATP9B	0.220766	0.0573078	0.129	0.085	1	ATP9B	0.656067
LDLRAP1	0.220844	0.0847954	0.106	0.067	1	LDLRAP1	0.655914
TRABD	0.221732	0.0693759	0.429	0.329	1	TRABD	0.654171
AKAP5	0.221959	0.0684274	0.129	0.085	1	AKAP5	0.653727
STX7	0.222406	-0.116233	0.1	0.14	1	STX7	0.652854
TUFM	0.222451	-0.0933539	0.424	0.463	1	TUFM	0.652766
PPIA	0.22264	0.0723198	0.882	0.787	1	PPIA	0.652397
C12orf57	0.222649	-0.114801	0.735	0.738	1	C12orf57	0.652379
ZNF639	0.223112	0.0447353	0.124	0.079	1	ZNF639	0.651476
NRDE2	0.223165	-0.0868678	0.094	0.134	1	NRDE2	0.651374
REXO4	0.223165	-0.112459	0.094	0.134	1	REXO4	0.651374
RAB18	0.223233	0.0934473	0.294	0.238	1	RAB18	0.651242
CFLAR	0.223359	0.0757153	0.659	0.585	1	CFLAR	0.650996
SLF2	0.223361	0.0364386	0.159	0.11	1	SLF2	0.650992
PRKRA	0.223556	0.0761854	0.135	0.091	1	PRKRA	0.650614
RASSF7	0.223589	-0.132819	0.124	0.165	1	RASSF7	0.65055
SLAMF6	0.22372	-0.108882	0.153	0.201	1	SLAMF6	0.650296
SSH2	0.223906	0.106639	0.224	0.165	1	SSH2	0.649934
FAM208A	0.224043	0.0913009	0.247	0.183	1	FAM208A	0.649669
USP9X	0.224166	-0.0856387	0.159	0.207	1	USP9X	0.649431
RPL37A	0.224315	0.0716085	0.971	0.963	1	RPL37A	0.649142
BTG1	0.224388	-0.131317	0.906	0.921	1	BTG1	0.649001
PYM1	0.224527	0.0256858	0.188	0.128	1	PYM1	0.648732
KLHDC2	0.224598	-0.149986	0.135	0.177	1	KLHDC2	0.648594
NECAP1	0.22473	-0.148073	0.112	0.152	1	NECAP1	0.648338
ECHDC1	0.224768	0.0771584	0.294	0.226	1	ECHDC1	0.648266
BCL2L1	0.225124	0.0825494	0.135	0.091	1	BCL2L1	0.647578
FBXW11	0.225164	-0.0843836	0.088	0.128	1	FBXW11	0.647502
XPO1	0.225191	0.11485	0.259	0.201	1	XPO1	0.64745
GSTO1	0.225247	-0.141047	0.435	0.476	1	GSTO1	0.647341
CEP120	0.225695	0.0670272	0.106	0.067	1	CEP120	0.646478
EIF3I	0.225944	0.0231134	0.494	0.384	1	EIF3I	0.645998
BANP	0.22597	-0.0896808	0.088	0.128	1	BANP	0.645949
MRPS6	0.226031	-0.106494	0.629	0.652	1	MRPS6	0.645832
LARP4	0.226056	0.0341659	0.153	0.104	1	LARP4	0.645785
CLASRP	0.22614	0.0629565	0.106	0.067	1	CLASRP	0.645622
ABI1	0.226151	0.0927781	0.241	0.189	1	ABI1	0.645601
ARAP2	0.226166	-0.124121	0.476	0.518	1	ARAP2	0.645574
SLC25A6	0.226264	0.10475	0.771	0.726	1	SLC25A6	0.645385
RPS8	0.226274	0.058186	1	0.994	1	RPS8	0.645365
TNFRSF1A	0.226441	-0.157488	0.259	0.293	1	TNFRSF1A	0.645045
EMC10	0.226883	-0.141294	0.159	0.201	1	EMC10	0.644199
SMAD3	0.227011	0.0594052	0.141	0.098	1	SMAD3	0.643954
SEC62	0.227039	-0.109927	0.465	0.518	1	SEC62	0.6439
CYBC1	0.227306	0.106483	0.335	0.274	1	CYBC1	0.643389
UBE2J2	0.22741	0.0854953	0.253	0.189	1	UBE2J2	0.64319
ATP6V1B2	0.227491	0.0691884	0.135	0.091	1	ATP6V1B2	0.643036
SLC38A10	0.227994	0.0792238	0.129	0.085	1	SLC38A10	0.642076
GTF2F2	0.228361	-0.141914	0.153	0.195	1	GTF2F2	0.641379
ZNF350	0.228401	-0.0915163	0.088	0.128	1	ZNF350	0.641302
ZNF107	0.228807	-0.130655	0.112	0.152	1	ZNF107	0.640531
RBL2	0.22883	0.0330559	0.547	0.439	1	RBL2	0.640487
GABARAPL1	0.229099	0.0616685	0.165	0.116	1	GABARAPL1	0.639978
WAS	0.229153	0.0888454	0.459	0.372	1	WAS	0.639875
CD8A	0.229229	-0.084681	0.824	0.793	1	CD8A	0.63973
CD2	0.229333	-0.0640062	0.982	0.988	1	CD2	0.639534
GOLT1B	0.229488	0.101165	0.171	0.128	1	GOLT1B	0.639241
EIF4E3	0.229634	0.0989444	0.112	0.073	1	EIF4E3	0.638964
TWISTNB	0.229728	0.090932	0.141	0.098	1	TWISTNB	0.638786
WDR45B	0.229746	0.042449	0.124	0.079	1	WDR45B	0.638752
GPR171	0.22982	0.0657939	0.635	0.53	1	GPR171	0.638612
ACTR1B	0.229965	0.0784985	0.159	0.11	1	ACTR1B	0.638338
RPN1	0.230508	-0.104199	0.165	0.213	1	RPN1	0.637314
CD74	0.230557	-0.0714481	0.9	0.878	1	CD74	0.637222
RAMMET	0.230975	0.0573611	0.335	0.262	1	RAMMET	0.636436
CWC15	0.231013	0.122004	0.412	0.329	1	CWC15	0.636363
DGUOK	0.231013	-0.115304	0.347	0.396	1	DGUOK	0.636363
EIF4EBP2	0.231052	-0.135344	0.112	0.152	1	EIF4EBP2	0.63629
ESCO1	0.231178	0.0853672	0.412	0.323	1	ESCO1	0.636053
CKS2	0.231391	-0.169124	0.147	0.189	1	CKS2	0.635654
UBE4A	0.231426	0.0449115	0.124	0.079	1	UBE4A	0.635587
GYPC	0.231525	0.0515519	0.718	0.652	1	GYPC	0.635402
SRSF5	0.231612	-0.092611	0.706	0.732	1	SRSF5	0.635238
RAB3GAP2	0.231618	0.0452992	0.176	0.122	1	RAB3GAP2	0.635228
RAB22A	0.231824	0.0887388	0.259	0.195	1	RAB22A	0.634842
SCFD1	0.232129	0.0557809	0.276	0.201	1	SCFD1	0.63427
INTS8	0.232433	0.0699372	0.106	0.067	1	INTS8	0.633702
UIMC1	0.232681	-0.113216	0.106	0.146	1	UIMC1	0.63324
PIGP	0.232794	0.111397	0.182	0.134	1	PIGP	0.633028
VIM	0.232852	-0.0959432	0.971	0.951	1	VIM	0.632921
GLT8D1	0.232881	-0.115547	0.118	0.159	1	GLT8D1	0.632867
CCDC137	0.232906	0.0580063	0.129	0.085	1	CCDC137	0.63282
PAFAH1B1	0.232912	0.0338021	0.459	0.348	1	PAFAH1B1	0.632808
IGBP1	0.232937	-0.134293	0.253	0.305	1	IGBP1	0.632761
PTGER2	0.233256	0.0962586	0.118	0.079	1	PTGER2	0.632168
TRIM4	0.233428	0.105448	0.194	0.146	1	TRIM4	0.631847
DCTN3	0.233899	0.0517286	0.312	0.232	1	DCTN3	0.630972
CD27	0.234012	-0.096053	0.647	0.695	1	CD27	0.630762
SIK3	0.234278	0.054248	0.206	0.146	1	SIK3	0.630269
DEF6	0.234448	0.0964071	0.294	0.226	1	DEF6	0.629953
TRG-AS1	0.234474	0.105196	0.376	0.299	1	TRG-AS1	0.629905
NSD3	0.234673	0.0808757	0.518	0.439	1	NSD3	0.629536
NUDT2	0.235239	-0.0741887	0.082	0.122	1	NUDT2	0.628492
SH3BP1	0.235387	0.0968512	0.218	0.159	1	SH3BP1	0.628217
NFKBIB	0.235622	0.0912734	0.2	0.152	1	NFKBIB	0.627785
BCAP31	0.235696	-0.0896675	0.347	0.402	1	BCAP31	0.627649
ATP6V1C1	0.235804	0.0900179	0.112	0.073	1	ATP6V1C1	0.627449
PSME4	0.235912	-0.170203	0.129	0.165	1	PSME4	0.627251
MRPL15	0.235951	0.0581857	0.159	0.11	1	MRPL15	0.627178
HIST1H4C	0.236091	0.0836418	0.371	0.299	1	HIST1H4C	0.626921
LMO4	0.236165	0.0962591	0.147	0.104	1	LMO4	0.626785
RECQL	0.236929	0.114772	0.282	0.226	1	RECQL	0.625381
CAMTA1	0.237181	0.0526519	0.2	0.14	1	CAMTA1	0.624921
PGAM1	0.237238	0.104015	0.482	0.409	1	PGAM1	0.624816
RBM14	0.237588	-0.151614	0.076	0.11	1	RBM14	0.624175
FMC1	0.237907	0.120266	0.124	0.085	1	FMC1	0.623593
TMEM161B-AS1	0.237925	-0.1247	0.071	0.104	1	TMEM161B-AS1	0.62356
APMAP	0.238138	-0.125751	0.365	0.415	1	APMAP	0.623171
MVB12A	0.238232	0.0548841	0.153	0.104	1	MVB12A	0.622999
PSIP1	0.23846	-0.125293	0.453	0.488	1	PSIP1	0.622585
ATP5F1D	0.238812	0.0737613	0.782	0.695	1	ATP5F1D	0.621943
GABPB2	0.238863	-0.078797	0.118	0.159	1	GABPB2	0.621852
PIGS	0.239319	0.0859462	0.118	0.079	1	PIGS	0.621022
NUP214	0.239618	-0.125083	0.118	0.159	1	NUP214	0.620481
S100A10	0.239952	0.107392	0.794	0.774	1	S100A10	0.619875
GPR174	0.240012	0.0383811	0.494	0.409	1	GPR174	0.619767
COX7C	0.240153	-0.0900492	0.888	0.884	1	COX7C	0.619512
TIMM13	0.240327	0.0498702	0.212	0.159	1	TIMM13	0.619198
TMA16	0.240414	0.0670192	0.135	0.091	1	TMA16	0.61904
LINC00623	0.240653	0.108003	0.341	0.28	1	LINC00623	0.618609
SEC31A	0.240785	0.101916	0.229	0.177	1	SEC31A	0.61837
SEPHS1	0.241239	0.0587619	0.135	0.091	1	SEPHS1	0.617553
ZDHHC5	0.241239	0.0524108	0.135	0.091	1	ZDHHC5	0.617553
TM2D2	0.241257	-0.0841429	0.082	0.122	1	TM2D2	0.617521
S100A11	0.241481	0.103471	0.759	0.665	1	S100A11	0.617117
INPP4B	0.241859	-0.117686	0.247	0.293	1	INPP4B	0.616439
MYH9	0.242251	0.0521499	0.729	0.64	1	MYH9	0.615734
SSR4	0.242254	-0.0783802	0.806	0.829	1	SSR4	0.61573
NDUFS7	0.242264	0.0795751	0.406	0.323	1	NDUFS7	0.615711
GPR82	0.242656	-0.128929	0.118	0.159	1	GPR82	0.615009
MRPL19	0.243112	0.057219	0.2	0.152	1	MRPL19	0.614194
MRPL22	0.243224	0.0964715	0.282	0.22	1	MRPL22	0.613993
KAT8	0.243606	0.109051	0.129	0.091	1	KAT8	0.613312
NSMCE1	0.24414	-0.104951	0.094	0.134	1	NSMCE1	0.61236
STARD3NL	0.244447	0.0553934	0.106	0.067	1	STARD3NL	0.611815
AURKAIP1	0.244466	0.0740601	0.6	0.524	1	AURKAIP1	0.611782
DNAJC2	0.244507	0.0516819	0.241	0.183	1	DNAJC2	0.611709
DMAP1	0.244551	0.0580785	0.194	0.14	1	DMAP1	0.61163
PHF12	0.244557	0.0742983	0.135	0.091	1	PHF12	0.61162
CLPTM1	0.244657	0.0412673	0.129	0.085	1	CLPTM1	0.611443
HLA-DPA1	0.245027	-0.0525518	0.882	0.86	1	HLA-DPA1	0.610785
CEP85L	0.245259	0.0672389	0.194	0.14	1	CEP85L	0.610376
DCLRE1C	0.245296	0.0916527	0.206	0.152	1	DCLRE1C	0.61031
BST2	0.245532	0.101951	0.594	0.506	1	BST2	0.609892
COX4I1	0.245587	0.0699907	0.906	0.854	1	COX4I1	0.609795
MCM6	0.245621	-0.0808829	0.082	0.122	1	MCM6	0.609734
AK6	0.245637	0.0815799	0.147	0.104	1	AK6	0.609707
EIF3M	0.245689	0.068335	0.529	0.427	1	EIF3M	0.609613
LSG1	0.246384	0.0660429	0.118	0.079	1	LSG1	0.608387
GALK2	0.246647	-0.0895429	0.094	0.134	1	GALK2	0.607924
STK38	0.246655	0.12946	0.165	0.122	1	STK38	0.60791
TRIM59	0.246839	-0.104945	0.106	0.146	1	TRIM59	0.607586
MTCH2	0.247053	-0.0907671	0.212	0.25	1	MTCH2	0.60721
MARK3	0.24726	-0.072989	0.218	0.262	1	MARK3	0.606847
LCOR	0.24732	-0.126004	0.171	0.213	1	LCOR	0.606741
BNIP3	0.247572	0.0673727	0.112	0.073	1	BNIP3	0.606299
OGFR	0.248143	0.0697039	0.318	0.25	1	OGFR	0.605298
VPS26C	0.248235	0.105323	0.124	0.085	1	VPS26C	0.605137
YWHAG	0.248235	0.0762773	0.124	0.085	1	YWHAG	0.605137
TOMM70	0.248235	0.0664592	0.124	0.085	1	TOMM70	0.605137
CDC37L1	0.248251	0.0697547	0.159	0.11	1	CDC37L1	0.605109
MAF1	0.248268	0.0680736	0.394	0.311	1	MAF1	0.60508
LAMP1	0.24827	-0.126551	0.194	0.244	1	LAMP1	0.605076
COQ5	0.248494	-0.113577	0.076	0.11	1	COQ5	0.604685
DEDD2	0.248525	0.0752988	0.165	0.116	1	DEDD2	0.60463
SIN3A	0.248815	0.0649283	0.194	0.14	1	SIN3A	0.604124
NF1	0.248815	-0.114732	0.147	0.189	1	NF1	0.604124
DCPS	0.249071	0.0834342	0.118	0.079	1	DCPS	0.603677
MZT2B	0.249072	0.0751875	0.741	0.616	1	MZT2B	0.603675
TBCB	0.249363	-0.0694974	0.341	0.409	1	TBCB	0.603167
SNAP23	0.249399	-0.0849473	0.1	0.14	1	SNAP23	0.603106
CPNE1	0.249496	0.080389	0.353	0.287	1	CPNE1	0.602936
MTF2	0.249767	0.0682365	0.253	0.189	1	MTF2	0.602465
RC3H1	0.249971	0.0740422	0.118	0.079	1	RC3H1	0.60211
NFU1	0.25038	0.0884725	0.135	0.098	1	NFU1	0.6014
RNFT1	0.25044	0.0428639	0.135	0.091	1	RNFT1	0.601296
DAD1	0.250636	0.0645937	0.682	0.585	1	DAD1	0.600957
ZKSCAN1	0.250649	-0.142635	0.247	0.287	1	ZKSCAN1	0.600934
ZNF224	0.250905	0.0758548	0.359	0.28	1	ZNF224	0.60049
RASSF1	0.251074	0.145886	0.218	0.177	1	RASSF1	0.600199
MAD2L1	0.251094	-0.116992	0.071	0.104	1	MAD2L1	0.600164
S100A4	0.251146	0.160211	0.841	0.762	1	S100A4	0.600074
WASHC2C	0.251274	0.0314792	0.112	0.073	1	WASHC2C	0.599853
ARL3	0.251555	0.0433101	0.129	0.085	1	ARL3	0.599367
TMEM138	0.251625	-0.141127	0.106	0.14	1	TMEM138	0.599246
ZNF397	0.251625	-0.15425	0.106	0.14	1	ZNF397	0.599246
C1GALT1C1	0.251714	-0.0803309	0.094	0.134	1	C1GALT1C1	0.599093
APRT	0.251822	-0.0691715	0.771	0.75	1	APRT	0.598906
PILRB	0.252107	0.0832929	0.259	0.201	1	PILRB	0.598416
RPF2	0.252205	0.0446343	0.112	0.073	1	RPF2	0.598246
SERBP1	0.252284	0.122169	0.741	0.646	1	SERBP1	0.598111
PCBP1	0.252372	0.0709095	0.7	0.573	1	PCBP1	0.597958
PDCL	0.252385	-0.135757	0.124	0.165	1	PDCL	0.597937
CDC40	0.252478	-0.160939	0.294	0.329	1	CDC40	0.597776
C15orf61	0.252685	-0.0978933	0.082	0.116	1	C15orf61	0.597421
YAF2	0.252913	0.0888281	0.147	0.104	1	YAF2	0.597029
CNOT6	0.252913	0.0836414	0.147	0.104	1	CNOT6	0.597029
ITGB2	0.253103	-0.106525	0.671	0.695	1	ITGB2	0.596703
RPRD2	0.253274	-0.161333	0.106	0.14	1	RPRD2	0.59641
RNF20	0.253419	-0.0964737	0.094	0.134	1	RNF20	0.596161
RPL23A	0.253453	0.0542057	1	1	1	RPL23A	0.596102
ECH1	0.253682	0.0640069	0.447	0.366	1	ECH1	0.59571
FCHSD2	0.253981	0.0430034	0.106	0.067	1	FCHSD2	0.595199
PYGO2	0.254076	-0.11611	0.076	0.11	1	PYGO2	0.595037
ERGIC2	0.254305	0.112123	0.276	0.22	1	ERGIC2	0.594644
TMEM120B	0.254405	-0.0705138	0.212	0.256	1	TMEM120B	0.594475
SMIM8	0.254506	0.0540199	0.118	0.079	1	SMIM8	0.594303
RPAIN	0.25469	0.0942898	0.312	0.244	1	RPAIN	0.593988
SSSCA1	0.254713	-0.101502	0.159	0.207	1	SSSCA1	0.59395
MAPKAPK5	0.255292	0.0878339	0.124	0.085	1	MAPKAPK5	0.592962
PRKACB	0.255347	0.0335391	0.329	0.25	1	PRKACB	0.592869
MFNG	0.255361	-0.131807	0.212	0.256	1	MFNG	0.592845
BCL7B	0.255414	-0.130846	0.206	0.244	1	BCL7B	0.592755
TPGS1	0.255476	-0.0985839	0.235	0.28	1	TPGS1	0.59265
KBTBD3	0.255495	-0.069878	0.088	0.128	1	KBTBD3	0.592618
CASP7	0.255649	-0.0945559	0.1	0.14	1	CASP7	0.592356
ZNF622	0.255817	-0.121761	0.176	0.22	1	ZNF622	0.592071
TMEM131L	0.255918	-0.0921883	0.071	0.104	1	TMEM131L	0.591899
ANXA6	0.255961	0.0579886	0.459	0.39	1	ANXA6	0.591827
AHCTF1	0.256137	0.0726897	0.176	0.128	1	AHCTF1	0.591527
ADGRE5	0.256239	0.0410386	0.388	0.317	1	ADGRE5	0.591354
CARHSP1	0.256401	0.0708018	0.412	0.335	1	CARHSP1	0.59108
ANXA11	0.25652	-0.138513	0.435	0.47	1	ANXA11	0.590879
ATP6V1E1	0.256568	0.11297	0.247	0.195	1	ATP6V1E1	0.590798
CD47	0.256588	-0.100829	0.582	0.604	1	CD47	0.590763
CXCR3	0.25682	-0.0710345	0.594	0.646	1	CXCR3	0.59037
SLC25A24	0.256923	0.0975758	0.171	0.122	1	SLC25A24	0.590197
DPF2	0.257151	-0.124164	0.206	0.25	1	DPF2	0.589812
CLIP1	0.257762	0.0807027	0.294	0.226	1	CLIP1	0.588781
CLP1	0.257866	-0.0952216	0.071	0.104	1	CLP1	0.588606
LGALS8	0.257983	0.115321	0.235	0.183	1	LGALS8	0.588409
TSPO	0.258289	-0.094471	0.712	0.677	1	TSPO	0.587895
NOP56	0.258374	0.0469354	0.282	0.213	1	NOP56	0.587751
MRPS34	0.258386	-0.124046	0.494	0.5	1	MRPS34	0.587732
43895	0.258651	0.0750528	0.159	0.116	1	43895	0.587286
MYD88	0.258675	0.0620514	0.147	0.104	1	MYD88	0.587245
TMEM141	0.25888	0.0683915	0.212	0.159	1	TMEM141	0.586902
SARAF	0.258923	-0.0863409	0.812	0.848	1	SARAF	0.58683
SRRM1	0.259028	-0.0930493	0.576	0.598	1	SRRM1	0.586654
TADA2B	0.259077	0.109085	0.129	0.091	1	TADA2B	0.586571
H2AFZ	0.259095	-0.0630188	0.759	0.78	1	H2AFZ	0.586542
NELFB	0.259699	0.0492257	0.194	0.14	1	NELFB	0.585529
ERG28	0.25986	-0.132817	0.153	0.189	1	ERG28	0.58526
MRPL36	0.260236	-0.111304	0.294	0.323	1	MRPL36	0.584632
USP16	0.260248	0.0856707	0.4	0.348	1	USP16	0.584613
N4BP2L1	0.26025	0.0811338	0.159	0.116	1	N4BP2L1	0.58461
GNB1	0.26037	-0.0911896	0.253	0.311	1	GNB1	0.584409
CRLS1	0.260676	0.0685331	0.124	0.085	1	CRLS1	0.583899
SNX6	0.26075	-0.0914092	0.447	0.488	1	SNX6	0.583776
ADA	0.260993	-0.075913	0.112	0.159	1	ADA	0.583371
ARIH1	0.261051	0.0713027	0.159	0.116	1	ARIH1	0.583274
SAP30	0.261436	-0.132662	0.1	0.134	1	SAP30	0.582634
SEC23IP	0.261879	0.0583472	0.118	0.079	1	SEC23IP	0.581899
TMEM208	0.261933	0.055285	0.341	0.268	1	TMEM208	0.58181
NFATC3	0.261973	0.0628396	0.3	0.238	1	NFATC3	0.581744
MRPS16	0.262192	0.0454464	0.294	0.232	1	MRPS16	0.58138
LMBRD1	0.262257	0.098128	0.159	0.116	1	LMBRD1	0.581272
MMP25-AS1	0.262286	-0.061318	0.2	0.25	1	MMP25-AS1	0.581225
UPF1	0.262462	0.053472	0.188	0.14	1	UPF1	0.580933
KIAA1191	0.262488	-0.127219	0.088	0.122	1	KIAA1191	0.580891
GNLY	0.262599	0.237596	0.271	0.22	1	GNLY	0.580707
CASP8AP2	0.263171	0.0699036	0.241	0.189	1	CASP8AP2	0.579762
CCZ1	0.263294	-0.0962847	0.188	0.238	1	CCZ1	0.579558
FMNL3	0.263572	0.0496585	0.112	0.073	1	FMNL3	0.579101
PDZD8	0.263818	-0.0725807	0.094	0.134	1	PDZD8	0.578696
SSBP4	0.263898	0.0186051	0.488	0.396	1	SSBP4	0.578564
DDX39A	0.264241	-0.112721	0.271	0.299	1	DDX39A	0.578
EIF4B	0.26428	0.065809	0.506	0.415	1	EIF4B	0.577935
KLC1	0.264338	0.0703506	0.171	0.122	1	KLC1	0.57784
PCID2	0.264455	0.0404218	0.388	0.305	1	PCID2	0.577649
ATP6V0D1	0.264518	0.0953211	0.241	0.189	1	ATP6V0D1	0.577544
TBC1D15	0.264711	-0.149312	0.147	0.183	1	TBC1D15	0.577228
FNTA	0.264775	0.0278887	0.335	0.25	1	FNTA	0.577124
DDX17	0.26525	-0.0794785	0.853	0.835	1	DDX17	0.576345
RAB5B	0.265443	-0.0693972	0.1	0.14	1	RAB5B	0.576029
CAAP1	0.265759	0.0368066	0.106	0.067	1	CAAP1	0.575512
SF3B5	0.265901	0.0377759	0.571	0.47	1	SF3B5	0.57528
LRRFIP2	0.266138	0.0365879	0.124	0.085	1	LRRFIP2	0.574893
TAF11	0.266211	0.0908817	0.153	0.11	1	TAF11	0.574774
PTPRC	0.266641	0.0575096	1	1	1	PTPRC	0.574073
SKA2	0.266711	-0.127905	0.2	0.238	1	SKA2	0.573959
EHBP1L1	0.266761	0.11609	0.188	0.146	1	EHBP1L1	0.573878
MRPS22	0.266841	-0.160523	0.135	0.165	1	MRPS22	0.573748
WASHC4	0.267056	0.0636035	0.124	0.085	1	WASHC4	0.573398
WASF2	0.267516	0.0737884	0.494	0.421	1	WASF2	0.57265
ARHGDIB	0.267808	0.0878501	0.906	0.878	1	ARHGDIB	0.572176
UPF3B	0.2683	0.040211	0.171	0.122	1	UPF3B	0.57138
DHX38	0.268417	0.0954128	0.171	0.128	1	DHX38	0.571189
AP2S1	0.268655	0.0830882	0.512	0.421	1	AP2S1	0.570805
LSM5	0.268743	0.0405779	0.241	0.183	1	LSM5	0.570663
RANBP2	0.268743	-0.0730727	0.188	0.238	1	RANBP2	0.570663
KMT2B	0.268948	0.0786579	0.253	0.195	1	KMT2B	0.570332
SETD5	0.269086	-0.088535	0.194	0.232	1	SETD5	0.570109
LYPLA1	0.270013	-0.133368	0.176	0.213	1	LYPLA1	0.568616
KPNA6	0.270111	0.102862	0.206	0.159	1	KPNA6	0.568457
PPP1CC	0.270246	-0.120054	0.271	0.317	1	PPP1CC	0.568241
ATF7IP2	0.27035	-0.124105	0.082	0.116	1	ATF7IP2	0.568074
DPP8	0.270461	0.0768087	0.235	0.189	1	DPP8	0.567895
UTP11	0.270465	0.04818	0.135	0.091	1	UTP11	0.56789
TMSB10	0.270811	0.0423636	1	1	1	TMSB10	0.567333
CHFR	0.271051	0.108114	0.135	0.098	1	CHFR	0.566949
KDM3A	0.271302	-0.102511	0.082	0.116	1	KDM3A	0.566546
MUM1	0.27164	-0.0632166	0.112	0.152	1	MUM1	0.566007
ISG20	0.271815	0.0958539	0.794	0.707	1	ISG20	0.565726
CDV3	0.272206	0.0857848	0.476	0.421	1	CDV3	0.565102
SAR1B	0.272296	-0.142714	0.218	0.256	1	SAR1B	0.564958
GIMAP6	0.272897	-0.12941	0.353	0.39	1	GIMAP6	0.564001
CCDC115	0.272962	-0.0993211	0.124	0.165	1	CCDC115	0.563897
TXN	0.272973	-0.0994616	0.6	0.616	1	TXN	0.56388
DHDDS	0.27331	0.0422784	0.112	0.073	1	DHDDS	0.563344
ADAT1	0.274174	-0.114353	0.082	0.116	1	ADAT1	0.561974
AP002387.2	0.274386	-0.0815394	0.129	0.171	1	AP002387.2	0.561638
MLLT10	0.274517	0.0852701	0.141	0.104	1	MLLT10	0.561431
DOCK2	0.274629	-0.110135	0.218	0.256	1	DOCK2	0.561253
PDCD7	0.274642	0.0993777	0.247	0.195	1	PDCD7	0.561232
SFT2D1	0.274857	0.0947657	0.347	0.287	1	SFT2D1	0.560893
NKIRAS2	0.275136	0.0574098	0.118	0.079	1	NKIRAS2	0.560453
RGS3	0.275136	0.0546346	0.118	0.079	1	RGS3	0.560453
UBAC1	0.275216	0.0701574	0.129	0.091	1	UBAC1	0.560326
SOS1	0.275433	-0.142627	0.253	0.293	1	SOS1	0.559983
AGA	0.275638	0.0703327	0.147	0.104	1	AGA	0.559662
SASH3	0.275655	0.0748848	0.418	0.341	1	SASH3	0.559634
ASCC3	0.275671	-0.0440746	0.194	0.25	1	ASCC3	0.559608
ACIN1	0.275687	0.0244798	0.312	0.238	1	ACIN1	0.559584
ITCH	0.275818	0.0817575	0.165	0.122	1	ITCH	0.559378
RNF219	0.275935	-0.0660428	0.1	0.14	1	RNF219	0.559193
TFG	0.276196	-0.0728937	0.118	0.159	1	TFG	0.558783
MRNIP	0.276397	-0.109071	0.1	0.134	1	MRNIP	0.558467
RRP7A	0.27676	-0.0974775	0.182	0.226	1	RRP7A	0.557897
THAP1	0.276799	-0.0774484	0.129	0.171	1	THAP1	0.557836
MUT	0.277274	-0.0964681	0.076	0.11	1	MUT	0.557091
GTF2H2	0.277296	0.0711194	0.124	0.085	1	GTF2H2	0.557056
EWSR1	0.27746	0.0764752	0.359	0.287	1	EWSR1	0.5568
IFITM2	0.27773	0.140458	0.565	0.5	1	IFITM2	0.556378
FLAD1	0.277908	-0.0658932	0.071	0.104	1	FLAD1	0.556099
APOBEC3F	0.278171	0.126087	0.106	0.073	1	APOBEC3F	0.555688
NRBF2	0.278185	-0.112451	0.182	0.226	1	NRBF2	0.555666
USP28	0.278192	0.0585806	0.2	0.146	1	USP28	0.555656
DCAF11	0.278271	-0.0754659	0.076	0.11	1	DCAF11	0.555533
PHF11	0.278406	-0.0680543	0.324	0.372	1	PHF11	0.555322
ARFGAP3	0.278504	-0.160882	0.159	0.195	1	ARFGAP3	0.555169
FBXL3	0.278894	0.0994951	0.129	0.091	1	FBXL3	0.554561
STK39	0.278908	0.0928913	0.141	0.104	1	STK39	0.55454
PMM1	0.279096	0.0765402	0.135	0.098	1	PMM1	0.554246
HNRNPUL2	0.279187	-0.106429	0.088	0.122	1	HNRNPUL2	0.554105
DUSP2	0.27966	0.23831	0.471	0.415	1	DUSP2	0.55337
RAB14	0.279678	0.093693	0.359	0.299	1	RAB14	0.553342
PHYKPL	0.279912	0.0374741	0.306	0.238	1	PHYKPL	0.552978
LAPTM5	0.280396	-0.0761232	0.853	0.835	1	LAPTM5	0.552229
TRAPPC2	0.280446	0.0525991	0.218	0.165	1	TRAPPC2	0.552151
APOPT1	0.280568	0.0844299	0.153	0.11	1	APOPT1	0.551962
DAZAP1	0.280632	0.0595547	0.212	0.159	1	DAZAP1	0.551862
GTF2H1	0.280745	-0.109484	0.094	0.128	1	GTF2H1	0.551688
MED7	0.280998	-0.0693203	0.112	0.152	1	MED7	0.551297
ECD	0.281086	0.0506234	0.124	0.085	1	ECD	0.551161
CARD16	0.281795	0.0967799	0.365	0.293	1	CARD16	0.550067
ZFC3H1	0.282228	-0.160139	0.182	0.22	1	ZFC3H1	0.5494
EMG1	0.282229	0.0950779	0.212	0.165	1	EMG1	0.549399
PSMA1	0.28245	-0.117596	0.488	0.512	1	PSMA1	0.549059
NDE1	0.282731	0.0746656	0.206	0.159	1	NDE1	0.548627
RCAN3	0.282819	0.0676156	0.329	0.268	1	RCAN3	0.548492
ASXL2	0.282836	0.0831176	0.188	0.146	1	ASXL2	0.548465
CDC42EP3	0.283015	0.0894028	0.353	0.287	1	CDC42EP3	0.548191
HNRNPUL1	0.283214	-0.164005	0.259	0.28	1	HNRNPUL1	0.547885
GBP1	0.284065	0.0852464	0.347	0.28	1	GBP1	0.546582
DGCR6L	0.284641	0.10895	0.265	0.213	1	DGCR6L	0.545702
NAAA	0.284889	0.0347789	0.153	0.11	1	NAAA	0.545325
APPBP2	0.28491	-0.088666	0.088	0.122	1	APPBP2	0.545292
UQCRH	0.285412	0.0435376	0.694	0.622	1	UQCRH	0.544527
ARHGAP9	0.285493	-0.0697083	0.4	0.445	1	ARHGAP9	0.544405
C19orf53	0.285798	0.0727402	0.729	0.634	1	C19orf53	0.543941
SLC38A2	0.28587	-0.154531	0.182	0.22	1	SLC38A2	0.543831
DAPK3	0.286214	-0.0788276	0.071	0.104	1	DAPK3	0.543309
CALM2	0.286847	-0.102671	0.806	0.75	1	CALM2	0.542349
AC239800.3	0.286931	-0.110727	0.106	0.14	1	AC239800.3	0.542223
LRRFIP1	0.287034	-0.0821933	0.582	0.604	1	LRRFIP1	0.542066
MGAT2	0.287278	-0.0870992	0.159	0.207	1	MGAT2	0.541697
OSBP	0.287302	0.0550927	0.135	0.098	1	OSBP	0.541661
TOB2	0.287464	-0.118189	0.129	0.165	1	TOB2	0.541417
NADSYN1	0.287763	0.0789121	0.135	0.098	1	NADSYN1	0.540965
DEF8	0.287801	-0.0953061	0.088	0.122	1	DEF8	0.540907
KBTBD2	0.288886	-0.0743133	0.076	0.11	1	KBTBD2	0.539274
KLHL36	0.289475	-0.10466	0.153	0.189	1	KLHL36	0.538389
PDHB	0.289571	-0.113884	0.165	0.201	1	PDHB	0.538245
EIF4E	0.289771	0.0797185	0.229	0.177	1	EIF4E	0.537945
TBCE	0.290133	0.0590727	0.153	0.11	1	TBCE	0.537403
SNRPD3	0.290382	-0.0512391	0.494	0.549	1	SNRPD3	0.537031
STAM2	0.290424	0.0430242	0.112	0.073	1	STAM2	0.536967
COPS2	0.290485	-0.116007	0.171	0.207	1	COPS2	0.536876
OSBPL9	0.291687	0.0583439	0.124	0.085	1	OSBPL9	0.535083
RPS25	0.292331	-0.0365304	1	1	1	RPS25	0.534126
GNG2	0.29261	-0.0912495	0.353	0.378	1	GNG2	0.53371
VEGFB	0.292765	0.0557924	0.212	0.165	1	VEGFB	0.533482
TOMM40	0.29289	-0.079704	0.182	0.232	1	TOMM40	0.533296
ZMYM2	0.293122	-0.125275	0.194	0.232	1	ZMYM2	0.532952
NOP10	0.293485	0.0988315	0.629	0.543	1	NOP10	0.532414
MRPS18B	0.293568	-0.139854	0.206	0.238	1	MRPS18B	0.532292
ESR2	0.293643	-0.0931218	0.088	0.122	1	ESR2	0.532181
IFI35	0.293811	-0.103159	0.271	0.311	1	IFI35	0.531932
G6PD	0.293938	0.0672713	0.129	0.091	1	G6PD	0.531745
UBE2G2	0.293995	0.0731418	0.229	0.171	1	UBE2G2	0.53166
ZFP14	0.294075	-0.0929746	0.159	0.201	1	ZFP14	0.531542
VAMP3	0.294624	0.0557435	0.124	0.085	1	VAMP3	0.530732
OCEL1	0.294764	0.0368632	0.176	0.128	1	OCEL1	0.530526
CTSS	0.295669	-0.118726	0.365	0.39	1	CTSS	0.529194
RALGAPB	0.295753	0.0723311	0.106	0.073	1	RALGAPB	0.529072
PFKL	0.296026	-0.0795989	0.106	0.14	1	PFKL	0.52867
UQCRFS1	0.296108	0.11437	0.429	0.378	1	UQCRFS1	0.52855
DDB1	0.29618	0.0387843	0.218	0.165	1	DDB1	0.528445
RPL3	0.296244	0.0363279	0.994	1	1	RPL3	0.52835
PRPF40A	0.296333	-0.0764457	0.459	0.494	1	PRPF40A	0.52822
ACO2	0.296609	0.0738535	0.135	0.098	1	ACO2	0.527815
TDG	0.296865	-0.0982524	0.153	0.195	1	TDG	0.52744
SPG21	0.297157	0.0575746	0.159	0.116	1	SPG21	0.527014
AKAP9	0.297988	-0.0616838	0.559	0.567	1	AKAP9	0.525802
TNRC6A	0.298475	0.0992392	0.212	0.171	1	TNRC6A	0.525093
LARP4B	0.298571	0.0518796	0.124	0.085	1	LARP4B	0.524952
MAU2	0.298571	-0.0934342	0.088	0.122	1	MAU2	0.524952
G3BP1	0.298648	-0.078009	0.265	0.311	1	G3BP1	0.524841
HDAC1	0.298656	-0.0859608	0.329	0.36	1	HDAC1	0.524829
ARL8A	0.298693	0.0913327	0.176	0.134	1	ARL8A	0.524774
IKBIP	0.298694	0.0484675	0.176	0.134	1	IKBIP	0.524774
MED13L	0.299225	-0.107076	0.118	0.152	1	MED13L	0.524002
RUNX3	0.299427	0.0372135	0.576	0.494	1	RUNX3	0.523709
OSER1	0.299564	0.0383075	0.124	0.085	1	OSER1	0.523511
CCNC	0.30023	0.0916489	0.2	0.152	1	CCNC	0.522545
DYNLL2	0.300388	0.0724681	0.135	0.098	1	DYNLL2	0.522318
KIAA0100	0.300953	-0.0810308	0.082	0.116	1	KIAA0100	0.521502
C1orf216	0.301062	0.0527733	0.106	0.073	1	C1orf216	0.521344
TUSC2	0.301126	-0.104738	0.241	0.28	1	TUSC2	0.521252
DDRGK1	0.30118	0.0573998	0.282	0.232	1	DDRGK1	0.521174
SCAMP2	0.301335	-0.0915045	0.318	0.36	1	SCAMP2	0.52095
TLE4	0.301575	0.0844238	0.141	0.104	1	TLE4	0.520605
FRYL	0.301586	0.0172184	0.247	0.183	1	FRYL	0.520588
NME1	0.301694	0.0780273	0.224	0.171	1	NME1	0.520434
SEPHS2	0.301848	0.0579239	0.276	0.213	1	SEPHS2	0.520212
ZBED1	0.302132	0.0631531	0.106	0.073	1	ZBED1	0.519804
EPS15	0.302193	-0.148667	0.259	0.293	1	EPS15	0.519715
PHKB	0.302324	0.0382722	0.247	0.183	1	PHKB	0.519527
PIGBOS1	0.302753	-0.107323	0.129	0.165	1	PIGBOS1	0.518911
TMEM250	0.302782	0.0894081	0.212	0.165	1	TMEM250	0.518871
TAB2	0.302889	0.0716873	0.176	0.134	1	TAB2	0.518716
DEK	0.303146	-0.063743	0.6	0.634	1	DEK	0.518349
EHMT1	0.303272	0.0234562	0.2	0.146	1	EHMT1	0.518167
TSC22D4	0.303335	-0.107727	0.347	0.378	1	TSC22D4	0.518078
C3orf38	0.303526	0.0514552	0.153	0.11	1	C3orf38	0.517804
STAMBP	0.303555	0.0506511	0.124	0.085	1	STAMBP	0.517763
EXOSC8	0.304145	-0.104549	0.176	0.213	1	EXOSC8	0.516919
VPS25	0.30421	0.0389935	0.182	0.134	1	VPS25	0.516826
ZSWIM7	0.304226	-0.160751	0.124	0.152	1	ZSWIM7	0.516803
PLP2	0.304246	-0.0554734	0.547	0.585	1	PLP2	0.516776
ANAPC1	0.304416	-0.0416751	0.071	0.104	1	ANAPC1	0.516532
PPHLN1	0.304574	-0.0507253	0.341	0.384	1	PPHLN1	0.516307
RPL21	0.30471	0.0395505	1	1	1	RPL21	0.516113
CCDC14	0.304977	0.0600439	0.188	0.14	1	CCDC14	0.515733
UBQLN1	0.305312	0.0804861	0.141	0.104	1	UBQLN1	0.515256
RBM48	0.305571	0.0630313	0.129	0.091	1	RBM48	0.514887
HERC1	0.305661	0.0463293	0.241	0.189	1	HERC1	0.514761
PYROXD1	0.305664	0.0123263	0.241	0.183	1	PYROXD1	0.514755
CAT	0.305798	-0.141541	0.118	0.146	1	CAT	0.514566
POGZ	0.305834	0.0619131	0.2	0.152	1	POGZ	0.514514
HENMT1	0.305834	0.0712321	0.2	0.152	1	HENMT1	0.514514
UBR4	0.305834	0.0518536	0.2	0.152	1	UBR4	0.514514
ETNK1	0.306295	0.0557552	0.224	0.171	1	ETNK1	0.51386
SAT1	0.306572	0.0969064	0.341	0.268	1	SAT1	0.513467
NUMA1	0.306712	0.0713256	0.182	0.14	1	NUMA1	0.51327
PSMC6	0.307024	0.0822639	0.329	0.262	1	PSMC6	0.512828
SCAI	0.307177	-0.064448	0.076	0.11	1	SCAI	0.512611
TRAPPC3	0.307549	-0.119068	0.147	0.177	1	TRAPPC3	0.512085
ATP13A3	0.307751	-0.115279	0.082	0.11	1	ATP13A3	0.511801
USP48	0.307778	-0.12308	0.241	0.274	1	USP48	0.511762
HMGN1	0.30809	-0.146037	0.588	0.604	1	HMGN1	0.511322
ZDHHC6	0.308257	0.0763112	0.2	0.152	1	ZDHHC6	0.511088
ZCCHC9	0.308424	0.0297397	0.182	0.134	1	ZCCHC9	0.510852
SLC9A3R1	0.308735	-0.122486	0.394	0.421	1	SLC9A3R1	0.510414
BFAR	0.309126	-0.0537755	0.165	0.207	1	BFAR	0.509864
COX7A2	0.309481	-0.0801097	0.712	0.689	1	COX7A2	0.509366
SFT2D2	0.309601	0.0525858	0.159	0.116	1	SFT2D2	0.509198
ACOT9	0.309607	0.023167	0.124	0.085	1	ACOT9	0.509189
CBX3	0.31014	-0.0873559	0.459	0.494	1	CBX3	0.508443
ERBIN	0.310341	0.0729913	0.318	0.256	1	ERBIN	0.508161
RNASEH2C	0.310646	0.0832647	0.382	0.317	1	RNASEH2C	0.507734
FYN	0.310658	0.0958416	0.7	0.604	1	FYN	0.507717
RNPEPL1	0.311068	0.0292193	0.518	0.421	1	RNPEPL1	0.507145
SETDB2	0.311501	0.0331395	0.129	0.091	1	SETDB2	0.50654
C1GALT1	0.311506	0.0783637	0.2	0.152	1	C1GALT1	0.506533
LBR	0.311602	0.0685535	0.529	0.421	1	LBR	0.5064
MBTPS1	0.311703	0.0618616	0.218	0.165	1	MBTPS1	0.506259
IL32	0.311704	0.0701513	0.971	0.994	1	IL32	0.506257
CDK5RAP3	0.311774	-0.119982	0.135	0.171	1	CDK5RAP3	0.50616
ZDHHC24	0.312697	-0.0782154	0.124	0.159	1	ZDHHC24	0.504877
NUP98	0.312697	-0.085921	0.124	0.159	1	NUP98	0.504877
NOC2L	0.312772	-0.080937	0.159	0.201	1	NOC2L	0.504772
KHDC4	0.313241	-0.0939511	0.129	0.165	1	KHDC4	0.504121
MRPL44	0.313451	0.0376054	0.165	0.122	1	MRPL44	0.50383
CD81	0.313939	0.0348913	0.941	0.866	1	CD81	0.503155
RPS13	0.314152	0.0321669	1	1	1	RPS13	0.502861
DCTN1	0.314494	0.0321343	0.129	0.091	1	DCTN1	0.502387
ORMDL1	0.314687	-0.0731793	0.565	0.591	1	ORMDL1	0.502121
SCAMP3	0.314711	0.0173649	0.124	0.085	1	SCAMP3	0.502087
IMMT	0.314714	0.123034	0.282	0.238	1	IMMT	0.502085
TP53I13	0.31479	-0.0698378	0.106	0.14	1	TP53I13	0.501979
PANK2	0.314995	-0.0933605	0.153	0.189	1	PANK2	0.501697
GATA3	0.315723	0.0817434	0.241	0.195	1	GATA3	0.500694
RPS27	0.316063	0.0384619	1	1	1	RPS27	0.500227
YTHDF2	0.316328	0.0519549	0.312	0.244	1	YTHDF2	0.499863
RPS6KA5	0.316578	0.0377425	0.176	0.134	1	RPS6KA5	0.499519
GBP2	0.31664	0.0907965	0.465	0.396	1	GBP2	0.499434
ARID1A	0.316653	0.0269753	0.265	0.201	1	ARID1A	0.499417
NAA50	0.316717	-0.0803	0.341	0.36	1	NAA50	0.499329
RAB28	0.317088	-0.067664	0.082	0.116	1	RAB28	0.498821
MOB2	0.317211	-0.117916	0.124	0.159	1	MOB2	0.498652
COIL	0.317223	0.0879019	0.206	0.159	1	COIL	0.498635
ETFB	0.317595	0.0704756	0.465	0.39	1	ETFB	0.498127
AC093673.1	0.31767	0.0695385	0.141	0.104	1	AC093673.1	0.498023
DGKE	0.317773	0.0849338	0.118	0.085	1	DGKE	0.497883
SHLD2	0.317787	0.0857086	0.135	0.098	1	SHLD2	0.497864
ORC4	0.31786	0.0722069	0.112	0.079	1	ORC4	0.497764
SKI	0.318262	-0.130504	0.106	0.134	1	SKI	0.497215
NLRC5	0.318268	0.077416	0.371	0.299	1	NLRC5	0.497206
PRMT1	0.318294	-0.0998942	0.341	0.366	1	PRMT1	0.497172
HDDC3	0.318437	-0.11535	0.159	0.189	1	HDDC3	0.496976
TADA3	0.318465	-0.119142	0.282	0.311	1	TADA3	0.496938
CHERP	0.318834	0.0359336	0.124	0.085	1	CHERP	0.496435
TRAF3IP3	0.319011	-0.131692	0.653	0.659	1	TRAF3IP3	0.496194
RLIM	0.319525	0.0281398	0.129	0.091	1	RLIM	0.495495
KIAA1671	0.319743	-0.0520955	0.082	0.116	1	KIAA1671	0.4952
GYG1	0.319746	-0.0946793	0.376	0.409	1	GYG1	0.495195
UBXN1	0.320076	-0.0841169	0.665	0.665	1	UBXN1	0.494747
TRA2A	0.320161	0.0588643	0.229	0.183	1	TRA2A	0.494631
DOCK11	0.320425	-0.0949718	0.141	0.177	1	DOCK11	0.494273
NSL1	0.320435	0.0922916	0.259	0.213	1	NSL1	0.49426
ZNF688	0.320473	0.0507055	0.171	0.128	1	ZNF688	0.494208
MLEC	0.320486	0.0342904	0.276	0.213	1	MLEC	0.494191
SAR1A	0.320497	0.0882287	0.271	0.213	1	SAR1A	0.494177
TIMM17A	0.32064	-0.119657	0.129	0.159	1	TIMM17A	0.493982
SPG7	0.321218	-0.0762589	0.218	0.262	1	SPG7	0.4932
THAP6	0.321363	0.0185693	0.171	0.128	1	THAP6	0.493004
TRAM1	0.322272	0.0733468	0.418	0.335	1	TRAM1	0.491778
GCC2	0.322375	-0.0775471	0.612	0.659	1	GCC2	0.491639
CDK6	0.322498	0.0702491	0.229	0.177	1	CDK6	0.491473
RBM12	0.32251	-0.0821705	0.106	0.14	1	RBM12	0.491457
ZEB1	0.324038	-0.0510622	0.088	0.122	1	ZEB1	0.489404
HELB	0.324388	0.0495732	0.259	0.201	1	HELB	0.488936
STT3B	0.324713	0.0734055	0.335	0.287	1	STT3B	0.4885
PIK3IP1	0.325065	-0.0798304	0.406	0.433	1	PIK3IP1	0.48803
LINC00426	0.325418	0.0734759	0.124	0.091	1	LINC00426	0.487558
ANKRD39	0.325839	0.027155	0.176	0.128	1	ANKRD39	0.486996
HNRNPH1	0.32627	0.0722656	0.576	0.5	1	HNRNPH1	0.486423
ABRACL	0.326491	0.0810066	0.629	0.579	1	ABRACL	0.486128
NDUFS4	0.326758	0.0865336	0.212	0.165	1	NDUFS4	0.485774
CLTB	0.326864	0.0668811	0.365	0.311	1	CLTB	0.485633
GORASP2	0.327032	0.0409608	0.159	0.116	1	GORASP2	0.48541
CNOT11	0.327107	0.0576874	0.176	0.134	1	CNOT11	0.48531
HOXB2	0.327186	0.0139499	0.124	0.085	1	HOXB2	0.485205
UBQLN2	0.327282	0.0478989	0.118	0.085	1	UBQLN2	0.485078
GART	0.327494	0.099486	0.124	0.091	1	GART	0.484796
TUBB4B	0.327585	0.0692137	0.453	0.372	1	TUBB4B	0.484676
GNB2	0.327602	-0.106675	0.288	0.329	1	GNB2	0.484653
UQCC3	0.327744	0.0601269	0.241	0.189	1	UQCC3	0.484465
IL16	0.327783	0.0780074	0.553	0.488	1	IL16	0.484414
AQR	0.327995	0.041107	0.176	0.134	1	AQR	0.484133
DDHD1	0.32825	0.0444531	0.306	0.25	1	DDHD1	0.483795
AKTIP	0.328442	0.073733	0.329	0.262	1	AKTIP	0.483542
ABR	0.328884	0.0828569	0.118	0.085	1	ABR	0.482957
LINC00847	0.328884	-0.120784	0.088	0.116	1	LINC00847	0.482957
AKR1A1	0.328997	0.0934304	0.259	0.207	1	AKR1A1	0.482807
FTL	0.329066	-0.0241465	0.947	0.957	1	FTL	0.482717
TIAL1	0.329192	-0.142301	0.329	0.348	1	TIAL1	0.48255
CDIPT	0.329449	0.051434	0.171	0.128	1	CDIPT	0.482211
INTS11	0.329609	-0.104153	0.188	0.226	1	INTS11	0.482001
PCBP2	0.330088	-0.0658611	0.465	0.512	1	PCBP2	0.48137
LEPROT	0.330222	0.0296351	0.194	0.146	1	LEPROT	0.481194
YDJC	0.330728	0.0335702	0.235	0.183	1	YDJC	0.480529
SNRPD2	0.330783	-0.085904	0.618	0.616	1	SNRPD2	0.480457
AP2M1	0.331256	0.0642165	0.488	0.415	1	AP2M1	0.479836
CYC1	0.331635	0.0331276	0.271	0.213	1	CYC1	0.479339
TRIR	0.331704	-0.0814508	0.847	0.799	1	TRIR	0.47925
HIST3H2A	0.331964	0.0348614	0.106	0.073	1	HIST3H2A	0.478909
NHLRC3	0.332045	0.0552272	0.229	0.177	1	NHLRC3	0.478803
NUTF2	0.332174	-0.116758	0.135	0.165	1	NUTF2	0.478635
43892	0.332315	0.0439551	0.235	0.183	1	43892	0.47845
TPI1	0.33234	0.0938203	0.535	0.488	1	TPI1	0.478417
EFHD2	0.332398	0.0157877	0.388	0.311	1	EFHD2	0.478341
[truncated: 2,872 more rows]

## Sheet: S1B-C1 IgG vs. PD-L1
Table S1B: Differential Expression of Cluster 1 CD8 T cells IgG vs. PD-L1
	p_val	avg_logFC	pct.1	pct.2	p_val_adj	Gene_ID	logP
CFL1	2.01343e-05	0.220934	0.993	0.982	0.406672	CFL1	4.69606
UBXN2B	0.000231461	-0.231867	0.007	0.104	1	UBXN2B	3.63552
ZNF683	0.000364977	-0.37733	0.04	0.165	1	ZNF683	3.43773
NOL9	0.000508911	-0.274415	0.04	0.159	1	NOL9	3.29336
AK3	0.0007428	0.266195	0.153	0.043	1	AK3	3.12913
AIDA	0.00125386	-0.297057	0.107	0.25	1	AIDA	2.90175
ITGA1	0.00127428	-0.343342	0.42	0.579	1	ITGA1	2.89474
ZFP90	0.00130077	-0.232037	0.033	0.134	1	ZFP90	2.8858
TMEM248	0.00131673	-0.24439	0.207	0.366	1	TMEM248	2.8805
WASHC4	0.00153705	0.241589	0.213	0.085	1	WASHC4	2.81331
GALNT6	0.00168726	0.239508	0.147	0.043	1	GALNT6	2.77282
NR2C2AP	0.0017597	0.197582	0.113	0.024	1	NR2C2AP	2.75456
WBP4	0.00182695	0.22723	0.213	0.085	1	WBP4	2.73827
AKAP11	0.00199967	0.248894	0.187	0.073	1	AKAP11	2.69904
PMPCB	0.00221047	0.288478	0.253	0.122	1	PMPCB	2.65552
CUEDC2	0.00260955	-0.265108	0.107	0.232	1	CUEDC2	2.58343
RPL27	0.00294931	0.156356	0.987	0.951	1	RPL27	2.53028
GTF2F2	0.00299555	-0.254195	0.08	0.195	1	GTF2F2	2.52352
CCS	0.00321132	0.189299	0.253	0.116	1	CCS	2.49332
LFNG	0.00334664	-0.219088	0.04	0.134	1	LFNG	2.47539
ATG16L1	0.00359131	0.22153	0.167	0.061	1	ATG16L1	2.44475
RPL31	0.00365019	-0.204246	0.767	0.829	1	RPL31	2.43768
TIPARP	0.00376572	0.241264	0.12	0.037	1	TIPARP	2.42415
NUDT3	0.00393137	-0.189186	0.04	0.134	1	NUDT3	2.40546
ADA2	0.00407345	-0.173037	0.033	0.122	1	ADA2	2.39004
43899	0.00413639	0.217811	0.233	0.11	1	43899	2.38338
NUP214	0.00418115	-0.251703	0.06	0.159	1	NUP214	2.3787
TIGIT	0.00418524	0.239363	0.78	0.659	1	TIGIT	2.37828
NDUFV2	0.00467029	0.240228	0.587	0.439	1	NDUFV2	2.33066
ENDOV	0.00511182	0.188736	0.12	0.037	1	ENDOV	2.29142
ANKRD36	0.00530123	0.227727	0.16	0.061	1	ANKRD36	2.27562
STRBP	0.00575365	-0.23091	0.093	0.207	1	STRBP	2.24006
GZMB	0.00584821	0.427826	0.533	0.39	1	GZMB	2.23298
MED8	0.00667928	0.256608	0.187	0.085	1	MED8	2.17527
PPIP5K2	0.00706157	0.246774	0.18	0.079	1	PPIP5K2	2.1511
ZNF430	0.00710031	-0.218129	0.167	0.305	1	ZNF430	2.14872
WIPI1	0.00718018	0.181679	0.107	0.03	1	WIPI1	2.14386
HERC6	0.00720647	0.165774	0.127	0.043	1	HERC6	2.14228
MMP24OS	0.00744448	-0.254927	0.113	0.226	1	MMP24OS	2.12817
OASL	0.00745945	-0.189248	0.387	0.573	1	OASL	2.12729
DYNLRB1	0.0074951	-0.189763	0.56	0.683	1	DYNLRB1	2.12522
C11orf58	0.00781041	-0.230561	0.587	0.677	1	C11orf58	2.10733
GZMH	0.00785301	0.317127	0.667	0.555	1	GZMH	2.10496
CCAR1	0.00790904	0.334311	0.313	0.189	1	CCAR1	2.10188
FAM136A	0.00810682	-0.247221	0.093	0.195	1	FAM136A	2.09115
TLE4	0.0081394	0.229145	0.207	0.104	1	TLE4	2.08941
MED13L	0.00836377	-0.220316	0.06	0.152	1	MED13L	2.0776
INTS4	0.00837972	-0.200344	0.04	0.122	1	INTS4	2.07677
PDXDC1	0.00840264	-0.268257	0.093	0.195	1	PDXDC1	2.07558
JADE1	0.00856361	0.225325	0.193	0.091	1	JADE1	2.06734
AC093323.1	0.00862229	-0.232896	0.06	0.146	1	AC093323.1	2.06438
ZBTB40	0.00883081	-0.205351	0.033	0.11	1	ZBTB40	2.054
EPC2	0.00893257	-0.201708	0.053	0.14	1	EPC2	2.04902
TOX4	0.0091724	-0.24437	0.193	0.311	1	TOX4	2.03752
HDGFL2	0.00922039	0.177784	0.213	0.104	1	HDGFL2	2.03525
CTCF	0.00944027	-0.189508	0.233	0.366	1	CTCF	2.02502
PQLC1	0.0100602	-0.191805	0.053	0.14	1	PQLC1	1.99739
PYURF	0.0104293	0.229824	0.473	0.335	1	PYURF	1.98174
TTC1	0.0107627	-0.206042	0.207	0.335	1	TTC1	1.96808
ATP2B4	0.0109227	0.335922	0.36	0.25	1	ATP2B4	1.96167
TMEM260	0.0110525	-0.203474	0.04	0.116	1	TMEM260	1.95654
SLC16A7	0.0112314	-0.246028	0.153	0.274	1	SLC16A7	1.94957
POLG	0.0114991	0.200434	0.173	0.079	1	POLG	1.93934
CIR1	0.0115997	-0.210914	0.24	0.366	1	CIR1	1.93555
CHD1	0.0117256	-0.203845	0.147	0.262	1	CHD1	1.93087
PICALM	0.0118009	0.205884	0.207	0.104	1	PICALM	1.92808
DESI2	0.0118342	0.216512	0.153	0.067	1	DESI2	1.92686
HERPUD2	0.0121926	0.216286	0.213	0.116	1	HERPUD2	1.9139
NDUFB7	0.0123444	0.184187	0.627	0.482	1	NDUFB7	1.90853
RPL18A	0.0124396	0.0927995	1	1	1	RPL18A	1.90519
PAF1	0.0126153	-0.197707	0.033	0.104	1	PAF1	1.8991
GALNT1	0.0127614	-0.246384	0.16	0.274	1	GALNT1	1.8941
ZNF800	0.0128215	-0.208148	0.16	0.28	1	ZNF800	1.89206
GABPB1-AS1	0.0128409	-0.236729	0.347	0.476	1	GABPB1-AS1	1.89141
NUP93	0.0129419	-0.190423	0.04	0.116	1	NUP93	1.888
C17orf75	0.0130912	-0.208857	0.047	0.122	1	C17orf75	1.88302
ABCE1	0.0131621	0.231846	0.3	0.189	1	ABCE1	1.88068
NHLRC2	0.013234	-0.18663	0.04	0.116	1	NHLRC2	1.87831
ARL16	0.0134235	-0.200977	0.1	0.201	1	ARL16	1.87214
NARS	0.0135267	-0.238283	0.14	0.244	1	NARS	1.86881
EIF4E3	0.0136403	0.213883	0.16	0.073	1	EIF4E3	1.86518
CREBZF	0.0137917	0.246348	0.387	0.268	1	CREBZF	1.86038
NFIC	0.0138658	-0.202306	0.053	0.134	1	NFIC	1.85805
LINC01934	0.0146355	0.262051	0.233	0.134	1	LINC01934	1.83459
N4BP2L1	0.0146615	0.228696	0.213	0.116	1	N4BP2L1	1.83382
ZMAT5	0.0146739	-0.1972	0.047	0.122	1	ZMAT5	1.83346
GFM1	0.0149897	-0.157107	0.06	0.146	1	GFM1	1.82421
LINC00861	0.015012	-0.221557	0.453	0.561	1	LINC00861	1.82356
CCDC142	0.0153446	-0.161908	0.033	0.104	1	CCDC142	1.81404
IST1	0.0153797	0.239372	0.253	0.146	1	IST1	1.81305
COMMD4	0.0154218	0.217839	0.26	0.146	1	COMMD4	1.81186
OPTN	0.0156965	0.229128	0.687	0.573	1	OPTN	1.8042
ST8SIA1	0.015957	0.21135	0.287	0.177	1	ST8SIA1	1.79705
NCOA1	0.0159736	-0.24403	0.133	0.232	1	NCOA1	1.7966
TOPORS	0.0161356	-0.280394	0.133	0.238	1	TOPORS	1.79222
EDEM1	0.0162984	-0.216756	0.087	0.177	1	EDEM1	1.78785
CXXC1	0.0165725	0.17043	0.113	0.043	1	CXXC1	1.78061
NUDT22	0.0171589	0.22158	0.353	0.226	1	NUDT22	1.76551
CD99	0.0171684	0.11493	0.867	0.726	1	CD99	1.76527
RPL27A	0.0171688	0.102181	0.98	0.988	1	RPL27A	1.76526
SNX14	0.0178486	-0.253058	0.073	0.152	1	SNX14	1.7484
CRTAM	0.0179543	0.253298	0.28	0.171	1	CRTAM	1.74583
ZNF429	0.0182262	-0.172988	0.047	0.122	1	ZNF429	1.7393
FBXO9	0.0190726	-0.228808	0.12	0.22	1	FBXO9	1.71959
RAB8A	0.0191451	-0.236862	0.36	0.488	1	RAB8A	1.71794
SDCBP	0.0192413	0.200618	0.347	0.226	1	SDCBP	1.71577
EIF4G1	0.0192966	-0.195788	0.107	0.201	1	EIF4G1	1.71452
SUMF2	0.0193732	-0.198491	0.133	0.238	1	SUMF2	1.7128
CCAR2	0.0198525	0.182566	0.12	0.049	1	CCAR2	1.70218
EEF1B2	0.0198934	0.174642	0.927	0.909	1	EEF1B2	1.70129
MAP3K13	0.0199908	-0.104549	0.053	0.134	1	MAP3K13	1.69917
RCAN2	0.0201519	0.259904	0.127	0.055	1	RCAN2	1.69568
MYSM1	0.0201663	-0.144982	0.153	0.268	1	MYSM1	1.69537
YY1	0.0201781	0.230861	0.5	0.39	1	YY1	1.69512
ZNF720	0.020246	-0.221218	0.127	0.226	1	ZNF720	1.69366
GDE1	0.0203812	-0.184048	0.073	0.152	1	GDE1	1.69077
SPN	0.0204568	-0.224703	0.3	0.421	1	SPN	1.68916
TNFRSF1A	0.0204754	-0.153908	0.173	0.293	1	TNFRSF1A	1.68877
TRAF1	0.020564	0.196724	0.293	0.177	1	TRAF1	1.68689
ZNF644	0.0206957	0.184492	0.413	0.305	1	ZNF644	1.68412
CD74	0.0209157	-0.153699	0.847	0.878	1	CD74	1.67953
RPP38	0.0213832	-0.193273	0.093	0.183	1	RPP38	1.66993
IP6K2	0.0214998	0.213223	0.28	0.171	1	IP6K2	1.66757
CTNNB1	0.0219928	-0.191768	0.107	0.201	1	CTNNB1	1.65772
LRIG2	0.0220587	-0.169651	0.04	0.11	1	LRIG2	1.65642
HMGN3	0.0222213	-0.195093	0.28	0.409	1	HMGN3	1.65323
GPATCH4	0.0223408	-0.238281	0.107	0.195	1	GPATCH4	1.6509
ASH2L	0.0225692	-0.161421	0.053	0.128	1	ASH2L	1.64648
ITFG1	0.0227231	-0.155951	0.087	0.177	1	ITFG1	1.64353
EIF2B2	0.0227249	0.149887	0.14	0.061	1	EIF2B2	1.6435
MARS	0.02279	-0.20529	0.053	0.122	1	MARS	1.64226
MDM2	0.0231603	-0.210251	0.093	0.177	1	MDM2	1.63526
FAM76A	0.0231832	0.218987	0.133	0.061	1	FAM76A	1.63483
RNF7	0.0233273	0.212467	0.607	0.476	1	RNF7	1.63214
ANKIB1	0.0233571	0.174715	0.18	0.091	1	ANKIB1	1.63158
FUT11	0.0238962	-0.198923	0.06	0.134	1	FUT11	1.62167
MRPL16	0.0240135	-0.161204	0.133	0.232	1	MRPL16	1.61954
NIP7	0.0245003	-0.200988	0.227	0.341	1	NIP7	1.61083
CUTA	0.0250326	-0.179219	0.367	0.494	1	CUTA	1.60149
ZFAND3	0.0251977	0.184893	0.107	0.043	1	ZFAND3	1.59864
C1orf131	0.0252773	-0.159869	0.14	0.244	1	C1orf131	1.59727
CSNK2A1	0.0254597	-0.206279	0.18	0.28	1	CSNK2A1	1.59415
SH2D1A	0.0256047	0.249666	0.527	0.427	1	SH2D1A	1.59168
RWDD1	0.0256686	0.176626	0.507	0.402	1	RWDD1	1.5906
TMEM223	0.0257846	-0.195919	0.16	0.262	1	TMEM223	1.58864
MEAF6	0.0260508	-0.136297	0.3	0.433	1	MEAF6	1.58418
PIP4P1	0.026059	0.172016	0.127	0.055	1	PIP4P1	1.58404
KDSR	0.0261693	0.216348	0.193	0.104	1	KDSR	1.58221
KARS	0.0262227	0.199778	0.233	0.14	1	KARS	1.58132
MRPL14	0.0264883	0.175487	0.373	0.244	1	MRPL14	1.57695
PDXK	0.0273318	-0.158368	0.067	0.146	1	PDXK	1.56333
STT3B	0.0273998	-0.197497	0.173	0.287	1	STT3B	1.56225
DAAM1	0.0276268	-0.188828	0.04	0.104	1	DAAM1	1.55867
HUWE1	0.0277818	0.175786	0.273	0.165	1	HUWE1	1.55624
NTMT1	0.0281572	-0.186865	0.107	0.195	1	NTMT1	1.55041
CREM	0.028369	0.182025	0.207	0.116	1	CREM	1.54716
DCTN3	0.028482	0.143041	0.36	0.232	1	DCTN3	1.54543
STK16	0.0284887	0.180254	0.167	0.085	1	STK16	1.54533
SIRT6	0.0286135	0.124895	0.107	0.043	1	SIRT6	1.54343
SNRPD2	0.0289228	-0.178426	0.54	0.616	1	SNRPD2	1.53876
ZNF12	0.028938	0.186018	0.207	0.116	1	ZNF12	1.53853
SOS1	0.0290499	-0.173995	0.18	0.293	1	SOS1	1.53685
NIPA2	0.0292285	-0.257243	0.127	0.213	1	NIPA2	1.53419
SP110	0.0294125	0.227285	0.46	0.348	1	SP110	1.53147
EPHA1-AS1	0.0295648	0.172003	0.247	0.146	1	EPHA1-AS1	1.52922
ELOB	0.0296291	0.204853	0.787	0.683	1	ELOB	1.52828
ARL6IP1	0.0304079	-0.1705	0.24	0.354	1	ARL6IP1	1.51701
HNRNPDL	0.030408	0.245736	0.613	0.53	1	HNRNPDL	1.51701
CKAP2	0.030487	-0.257151	0.153	0.238	1	CKAP2	1.51589
PSMB8	0.030498	0.141929	0.907	0.793	1	PSMB8	1.51573
ATP6V0D1	0.0310754	0.249434	0.287	0.189	1	ATP6V0D1	1.50758
NBPF19	0.0310755	-0.183199	0.053	0.122	1	NBPF19	1.50758
KIAA1191	0.0310755	-0.19064	0.053	0.122	1	KIAA1191	1.50758
MEX3C	0.0310986	-0.194742	0.073	0.146	1	MEX3C	1.50726
SARS	0.0313978	-0.206329	0.167	0.262	1	SARS	1.5031
ZNF131	0.0315082	-0.185858	0.187	0.293	1	ZNF131	1.50158
TDP2	0.0316364	-0.210056	0.073	0.146	1	TDP2	1.49981
DIAPH1	0.0317257	-0.222199	0.32	0.427	1	DIAPH1	1.49859
NDUFA12	0.031948	-0.149881	0.467	0.585	1	NDUFA12	1.49556
TMX2	0.0322943	-0.150879	0.107	0.201	1	TMX2	1.49087
FBH1	0.0323657	0.128936	0.153	0.073	1	FBH1	1.48991
NPC1	0.0326446	0.133306	0.107	0.043	1	NPC1	1.48619
DGUOK	0.0326451	-0.203064	0.293	0.396	1	DGUOK	1.48618
TMEM263	0.0328696	-0.138399	0.04	0.104	1	TMEM263	1.48321
CELF2	0.0329077	0.229074	0.533	0.445	1	CELF2	1.4827
SLC5A3	0.0330062	0.185061	0.427	0.317	1	SLC5A3	1.4814
DEDD2	0.0332603	0.220101	0.2	0.116	1	DEDD2	1.47807
TP53TG1	0.0336017	-0.161208	0.047	0.11	1	TP53TG1	1.47364
ARL4C	0.0339288	0.147273	0.867	0.793	1	ARL4C	1.46943
XPO4	0.0342712	-0.184382	0.047	0.11	1	XPO4	1.46507
KAT6B	0.0342941	0.21998	0.16	0.085	1	KAT6B	1.46478
SPG7	0.0343682	-0.178451	0.167	0.262	1	SPG7	1.46384
IQSEC1	0.0344811	0.198989	0.16	0.085	1	IQSEC1	1.46242
PSMD13	0.0346913	-0.211979	0.313	0.409	1	PSMD13	1.45978
Z82206.1	0.0347238	-0.207996	0.047	0.11	1	Z82206.1	1.45937
DEF6	0.0349175	0.17216	0.333	0.226	1	DEF6	1.45696
AZI2	0.0349999	0.134456	0.18	0.098	1	AZI2	1.45593
CIC	0.0351816	0.166575	0.113	0.049	1	CIC	1.45368
TUBGCP2	0.0352435	0.191023	0.307	0.195	1	TUBGCP2	1.45292
RAP2B	0.0353615	0.154534	0.18	0.098	1	RAP2B	1.45147
TAF7	0.0354857	-0.195922	0.373	0.518	1	TAF7	1.44995
SUPT20H	0.0354976	-0.196179	0.133	0.22	1	SUPT20H	1.4498
E2F4	0.0360725	0.170893	0.227	0.134	1	E2F4	1.44282
HBS1L	0.0360749	0.207401	0.213	0.128	1	HBS1L	1.44279
RASSF7	0.0362101	-0.184224	0.087	0.165	1	RASSF7	1.44117
KAT5	0.0365224	-0.151942	0.06	0.128	1	KAT5	1.43744
MANEA-DT	0.0365224	-0.18288	0.06	0.128	1	MANEA-DT	1.43744
TADA3	0.036681	-0.211964	0.213	0.311	1	TADA3	1.43556
HMGN1	0.0368308	-0.262308	0.527	0.604	1	HMGN1	1.43379
TSPOAP1-AS1	0.0368754	0.158285	0.12	0.055	1	TSPOAP1-AS1	1.43326
CNBP	0.0369546	-0.154858	0.513	0.622	1	CNBP	1.43233
SERPINB6	0.0371175	0.201236	0.147	0.073	1	SERPINB6	1.43042
ATP2B1	0.0372925	0.198489	0.16	0.085	1	ATP2B1	1.42838
CASP3	0.0375325	-0.186008	0.233	0.341	1	CASP3	1.42559
LSM10	0.0378903	0.19567	0.34	0.244	1	LSM10	1.42147
METTL4	0.0380712	-0.20751	0.073	0.14	1	METTL4	1.4194
ARMC1	0.038175	-0.178602	0.093	0.171	1	ARMC1	1.41822
NDUFC1	0.0384007	-0.210993	0.327	0.427	1	NDUFC1	1.41566
MRPL39	0.0387613	-0.153646	0.093	0.177	1	MRPL39	1.4116
ZMYM2	0.03907	-0.192134	0.14	0.232	1	ZMYM2	1.40816
ZFAND6	0.0391147	-0.156723	0.213	0.323	1	ZFAND6	1.40766
MCM3	0.0391646	0.191384	0.173	0.098	1	MCM3	1.40711
LONP2	0.0399704	0.202396	0.2	0.116	1	LONP2	1.39826
CCL5	0.0402251	-0.113049	1	1	1	CCL5	1.3955
PAK2	0.040359	-0.19936	0.447	0.549	1	PAK2	1.39406
LTB	0.0404281	-0.184113	0.807	0.872	1	LTB	1.39332
YIPF4	0.0406585	-0.218495	0.227	0.323	1	YIPF4	1.39085
RRP8	0.0407673	0.153073	0.18	0.098	1	RRP8	1.38969
PRPF40A	0.0407884	-0.137723	0.393	0.494	1	PRPF40A	1.38946
SMIM12	0.0408991	-0.171291	0.14	0.226	1	SMIM12	1.38829
GIT1	0.0409899	0.135311	0.12	0.055	1	GIT1	1.38732
NEK7	0.0412854	-0.219537	0.167	0.25	1	NEK7	1.3842
SF3A3	0.0418288	0.206986	0.253	0.165	1	SF3A3	1.37852
HLA-DRB1	0.0421758	-0.18889	0.793	0.872	1	HLA-DRB1	1.37494
AMIGO2	0.042302	-0.140324	0.073	0.146	1	AMIGO2	1.37364
ITM2C	0.0423117	-0.144388	0.773	0.866	1	ITM2C	1.37354
RFX7	0.0425321	-0.149003	0.053	0.116	1	RFX7	1.37128
CCDC107	0.0426422	0.190983	0.453	0.348	1	CCDC107	1.37016
OSBP	0.043126	0.154766	0.173	0.098	1	OSBP	1.36526
ATG4B	0.0431823	0.138485	0.18	0.098	1	ATG4B	1.36469
NFE2L2	0.0435444	-0.161672	0.153	0.244	1	NFE2L2	1.36107
HTRA2	0.043589	0.151583	0.127	0.061	1	HTRA2	1.36062
USP10	0.0437844	-0.153042	0.087	0.165	1	USP10	1.35868
MCUB	0.0439421	0.183457	0.42	0.305	1	MCUB	1.35712
SLC30A9	0.0440647	-0.128117	0.047	0.11	1	SLC30A9	1.35591
ERI3	0.0441076	0.144247	0.127	0.061	1	ERI3	1.35549
POLDIP3	0.0442231	0.179859	0.173	0.098	1	POLDIP3	1.35435
LSM5	0.0442629	0.127687	0.287	0.183	1	LSM5	1.35396
HCCS	0.0443633	0.136489	0.147	0.073	1	HCCS	1.35298
ZMAT3	0.044393	-0.15079	0.053	0.116	1	ZMAT3	1.35269
ME2	0.0444955	-0.15702	0.133	0.22	1	ME2	1.35168
TNIP2	0.0445539	-0.188862	0.167	0.256	1	TNIP2	1.35111
C1orf123	0.044606	0.159439	0.18	0.104	1	C1orf123	1.35061
ZNF407	0.0446321	-0.175545	0.08	0.152	1	ZNF407	1.35035
MIER1	0.0446433	-0.2261	0.373	0.463	1	MIER1	1.35024
SIRT2	0.0447223	0.167693	0.22	0.134	1	SIRT2	1.34948
PTPN22	0.0447452	0.124088	0.46	0.335	1	PTPN22	1.34925
CCDC71L	0.0452935	0.123125	0.127	0.061	1	CCDC71L	1.34396
YEATS4	0.0454157	-0.130048	0.06	0.128	1	YEATS4	1.34279
RPE	0.045427	0.141669	0.127	0.061	1	RPE	1.34269
PPP4C	0.045741	-0.18806	0.327	0.427	1	PPP4C	1.33969
BRI3	0.0462173	0.188492	0.4	0.293	1	BRI3	1.3352
STX8	0.0463448	-0.134819	0.187	0.287	1	STX8	1.334
MIS18BP1	0.046466	-0.245486	0.213	0.299	1	MIS18BP1	1.33286
MCPH1	0.0469097	0.159256	0.133	0.067	1	MCPH1	1.32874
TMEM106B	0.0469581	-0.136222	0.12	0.207	1	TMEM106B	1.32829
TNIP1	0.0471008	0.17007	0.26	0.171	1	TNIP1	1.32697
SNHG8	0.0476734	0.240515	0.32	0.226	1	SNHG8	1.32172
AIFM1	0.047743	-0.154408	0.053	0.116	1	AIFM1	1.32109
SERGEF	0.047743	-0.156122	0.053	0.116	1	SERGEF	1.32109
WDR18	0.048216	-0.143597	0.087	0.159	1	WDR18	1.31681
CTSS	0.0482842	-0.184358	0.287	0.39	1	CTSS	1.3162
RPL35	0.0489183	0.0887058	0.98	0.988	1	RPL35	1.31053
CDC14A	0.0489656	0.187323	0.26	0.171	1	CDC14A	1.31011
APOL1	0.0490566	-0.145442	0.08	0.152	1	APOL1	1.3093
COX7A2	0.0492312	-0.128039	0.66	0.689	1	COX7A2	1.30776
TDG	0.0493691	-0.166688	0.113	0.195	1	TDG	1.30654
P4HB	0.0493769	-0.143027	0.313	0.427	1	P4HB	1.30648
C7orf26	0.0500197	0.152657	0.107	0.049	1	C7orf26	1.30086
SMARCA4	0.0503312	0.187612	0.233	0.152	1	SMARCA4	1.29816
TTC39C	0.0504622	0.158978	0.467	0.348	1	TTC39C	1.29703
HNRNPU	0.0506986	-0.127632	0.747	0.896	1	HNRNPU	1.295
ABCD2	0.0510555	0.1775	0.14	0.073	1	ABCD2	1.29196
POU2F2	0.051303	-0.130854	0.053	0.116	1	POU2F2	1.28986
ATP8B2	0.0513487	-0.15603	0.1	0.177	1	ATP8B2	1.28947
DGKA	0.0515991	-0.168618	0.16	0.25	1	DGKA	1.28736
DDI2	0.0516094	-0.126969	0.053	0.116	1	DDI2	1.28727
ZKSCAN1	0.051782	-0.216621	0.2	0.287	1	ZKSCAN1	1.28582
PRDM2	0.051894	0.147513	0.307	0.207	1	PRDM2	1.28488
GPN3	0.051915	0.136789	0.133	0.067	1	GPN3	1.28471
RPL29	0.051921	0.10381	1	1	1	RPL29	1.28466
UBE4A	0.0519455	0.131704	0.153	0.079	1	UBE4A	1.28445
TRMT10C	0.0524493	-0.159099	0.193	0.287	1	TRMT10C	1.28026
STAG1	0.0525318	-0.192735	0.12	0.201	1	STAG1	1.27958
TSC22D3	0.0525332	0.129846	0.127	0.061	1	TSC22D3	1.27957
NDUFA9	0.0525384	-0.191302	0.167	0.262	1	NDUFA9	1.27952
UCHL5	0.0530896	-0.174989	0.087	0.159	1	UCHL5	1.27499
GBP2	0.0531551	0.188046	0.5	0.396	1	GBP2	1.27446
EFHD2	0.0533504	0.155315	0.427	0.311	1	EFHD2	1.27286
STK38	0.053686	0.192861	0.2	0.122	1	STK38	1.27014
ITK	0.0538078	-0.14187	0.233	0.329	1	ITK	1.26916
UQCR10	0.0538497	-0.127988	0.66	0.762	1	UQCR10	1.26882
AC243960.1	0.0538905	0.204601	0.213	0.134	1	AC243960.1	1.26849
SELPLG	0.0548006	0.192804	0.353	0.25	1	SELPLG	1.26122
IKZF5	0.0549494	0.135399	0.107	0.049	1	IKZF5	1.26004
SLC12A9	0.0549818	0.186545	0.113	0.055	1	SLC12A9	1.25978
CHIC2	0.0555016	0.156116	0.227	0.146	1	CHIC2	1.25569
EIF5A	0.0560126	0.134583	0.527	0.396	1	EIF5A	1.25171
RNASET2	0.0563414	-0.158528	0.353	0.451	1	RNASET2	1.24917
GPR65	0.0563905	0.18745	0.3	0.207	1	GPR65	1.24879
ZNF672	0.05665	0.137654	0.113	0.055	1	ZNF672	1.2468
PSMG2	0.0566999	-0.188807	0.293	0.384	1	PSMG2	1.24642
LPIN2	0.0567678	0.197471	0.413	0.335	1	LPIN2	1.2459
ITM2B	0.0568201	0.116269	0.967	0.939	1	ITM2B	1.2455
MX1	0.0568579	0.164258	0.213	0.128	1	MX1	1.24521
MINK1	0.0569035	-0.149506	0.06	0.122	1	MINK1	1.24486
FAM96B	0.0569878	0.204982	0.567	0.457	1	FAM96B	1.24422
CYB561A3	0.0570577	-0.104983	0.053	0.116	1	CYB561A3	1.24369
SINHCAF	0.0571917	0.149025	0.233	0.146	1	SINHCAF	1.24267
FBXO28	0.0573595	0.11817	0.133	0.067	1	FBXO28	1.24139
GPR174	0.0573893	0.179279	0.52	0.409	1	GPR174	1.24117
IL12RB1	0.0574383	0.176768	0.193	0.116	1	IL12RB1	1.2408
HINT2	0.0574384	-0.159578	0.113	0.189	1	HINT2	1.2408
EIF3J	0.0576168	0.164443	0.313	0.213	1	EIF3J	1.23945
RPS15	0.0577298	0.0742498	1	1	1	RPS15	1.2386
DNAJC19	0.0578592	-0.185999	0.227	0.311	1	DNAJC19	1.23763
PPP1R18	0.0578772	0.175522	0.613	0.506	1	PPP1R18	1.23749
TALDO1	0.0579243	-0.148807	0.42	0.5	1	TALDO1	1.23714
SEC61A1	0.0582411	0.188196	0.173	0.104	1	SEC61A1	1.23477
TMC6	0.0582752	-0.187152	0.333	0.409	1	TMC6	1.23452
CHMP2A	0.0584364	-0.150536	0.447	0.549	1	CHMP2A	1.23332
B4GALT1	0.0585142	-0.148361	0.073	0.14	1	B4GALT1	1.23274
CNOT1	0.0585184	-0.212038	0.113	0.183	1	CNOT1	1.23271
N4BP1	0.058521	0.160395	0.367	0.262	1	N4BP1	1.23269
CHMP6	0.0585444	0.131518	0.147	0.079	1	CHMP6	1.23251
PIK3CB	0.058636	-0.138628	0.047	0.104	1	PIK3CB	1.23184
TOPBP1	0.0594068	0.137642	0.113	0.055	1	TOPBP1	1.22616
CDIPT	0.0595872	0.18103	0.207	0.128	1	CDIPT	1.22485
PANK3	0.0597263	-0.125265	0.047	0.104	1	PANK3	1.22383
RPL19	0.0598103	0.0602831	1	1	1	RPL19	1.22322
APPBP2	0.0598696	-0.0981239	0.06	0.122	1	APPBP2	1.22279
CKLF	0.0604328	0.209386	0.713	0.659	1	CKLF	1.21873
PEX1	0.0604689	0.133419	0.113	0.055	1	PEX1	1.21847
OARD1	0.0605258	-0.182319	0.16	0.244	1	OARD1	1.21806
DDX46	0.0606674	-0.169614	0.52	0.604	1	DDX46	1.21704
RAB1A	0.0607175	0.177801	0.16	0.091	1	RAB1A	1.21669
NENF	0.0607448	0.150504	0.307	0.201	1	NENF	1.21649
FRA10AC1	0.0607591	0.160278	0.173	0.098	1	FRA10AC1	1.21639
PIM3	0.0608453	0.134719	0.353	0.256	1	PIM3	1.21577
DHX8	0.0612284	-0.124405	0.06	0.122	1	DHX8	1.21305
DDRGK1	0.0617092	0.199452	0.32	0.232	1	DDRGK1	1.20965
NLRP1	0.0617429	0.138848	0.18	0.104	1	NLRP1	1.20941
RPL6	0.0618657	0.0720483	0.993	0.988	1	RPL6	1.20855
PVT1	0.0618867	-0.118765	0.1	0.177	1	PVT1	1.2084
AMDHD2	0.0619094	0.14499	0.113	0.055	1	AMDHD2	1.20824
TUBA1C	0.0619239	0.158681	0.2	0.122	1	TUBA1C	1.20814
LINC02273	0.0619573	-0.125269	0.047	0.104	1	LINC02273	1.20791
TPGS2	0.0619905	-0.17104	0.133	0.213	1	TPGS2	1.20768
RBBP7	0.06205	-0.148514	0.167	0.25	1	RBBP7	1.20726
CTU1	0.0622198	0.155713	0.173	0.104	1	CTU1	1.20607
ZNF350	0.0622519	-0.1349	0.067	0.128	1	ZNF350	1.20585
MCM6	0.0622642	-0.134961	0.06	0.122	1	MCM6	1.20576
TOMM20	0.0622985	0.173465	0.553	0.482	1	TOMM20	1.20552
PEX16	0.0624716	0.195868	0.193	0.122	1	PEX16	1.20432
MRPS10	0.0625042	-0.202533	0.173	0.256	1	MRPS10	1.20409
UBA7	0.0626447	0.144413	0.127	0.067	1	UBA7	1.20312
PTPRJ	0.0628556	0.153014	0.193	0.116	1	PTPRJ	1.20166
SRGN	0.062901	-0.135168	0.953	0.951	1	SRGN	1.20134
DNAJC1	0.0630188	0.190722	0.413	0.317	1	DNAJC1	1.20053
ATP6V1H	0.0630235	0.17432	0.2	0.122	1	ATP6V1H	1.2005
GATAD1	0.0630876	0.125208	0.147	0.079	1	GATAD1	1.20006
BTG3	0.0637275	-0.15913	0.087	0.152	1	BTG3	1.19567
EIF5A2	0.0637359	0.133359	0.12	0.061	1	EIF5A2	1.19562
PIK3IP1	0.0637412	-0.13554	0.34	0.433	1	PIK3IP1	1.19558
ZDHHC24	0.063764	-0.12339	0.087	0.159	1	ZDHHC24	1.19542
WASHC2C	0.0639081	0.0783703	0.14	0.073	1	WASHC2C	1.19444
NDUFS1	0.064214	0.179809	0.187	0.116	1	NDUFS1	1.19237
VPS26B	0.0642442	0.125139	0.14	0.073	1	VPS26B	1.19217
ZDHHC20	0.0643849	0.14386	0.127	0.067	1	ZDHHC20	1.19122
INIP	0.0646052	-0.146389	0.08	0.146	1	INIP	1.18973
GOT2	0.0646869	-0.153189	0.053	0.11	1	GOT2	1.18918
PPP1R21	0.0650389	-0.100501	0.047	0.104	1	PPP1R21	1.18683
RPS25	0.065149	-0.0727134	1	1	1	RPS25	1.18609
TMEM33	0.0655875	-0.132914	0.08	0.146	1	TMEM33	1.18318
INTS1	0.0658221	-0.101785	0.06	0.122	1	INTS1	1.18163
SDAD1	0.0659292	0.179609	0.24	0.152	1	SDAD1	1.18092
NIN	0.0660634	0.158637	0.387	0.28	1	NIN	1.18004
POP7	0.0661454	0.163082	0.167	0.098	1	POP7	1.1795
SETX	0.0661667	-0.139877	0.327	0.409	1	SETX	1.17936
GLIPR1	0.0661898	-0.208105	0.387	0.463	1	GLIPR1	1.17921
RMC1	0.0662099	-0.130153	0.053	0.11	1	RMC1	1.17908
CLNS1A	0.0664181	0.146693	0.333	0.226	1	CLNS1A	1.17771
SSBP1	0.0664236	-0.127064	0.467	0.579	1	SSBP1	1.17768
IL7R	0.0664689	0.339262	0.327	0.244	1	IL7R	1.17738
SRSF10	0.0665318	-0.134065	0.36	0.445	1	SRSF10	1.17697
VTI1B	0.0669258	-0.1292	0.12	0.201	1	VTI1B	1.17441
MAP2K7	0.0671952	-0.160529	0.14	0.213	1	MAP2K7	1.17266
GNB5	0.0672657	0.144545	0.24	0.152	1	GNB5	1.17221
GOSR2	0.0673042	0.153738	0.187	0.116	1	GOSR2	1.17196
RBBP6	0.0675042	-0.15973	0.227	0.329	1	RBBP6	1.17067
LMAN2	0.0675183	-0.189407	0.44	0.518	1	LMAN2	1.17058
M6PR	0.0677913	0.125963	0.347	0.25	1	M6PR	1.16883
DGAT1	0.0682088	-0.132711	0.067	0.128	1	DGAT1	1.16616
PRPF6	0.0682373	-0.204521	0.167	0.244	1	PRPF6	1.16598
SYMPK	0.0684381	-0.117198	0.08	0.146	1	SYMPK	1.1647
PNO1	0.068599	-0.091563	0.06	0.122	1	PNO1	1.16368
PLA2G16	0.0686052	0.173603	0.4	0.317	1	PLA2G16	1.16364
PURB	0.068609	-0.146049	0.08	0.146	1	PURB	1.16362
CD8B	0.0687405	-0.209059	0.66	0.744	1	CD8B	1.16279
RFK	0.0687456	-0.16417	0.073	0.134	1	RFK	1.16276
MRPS25	0.0688831	0.119204	0.153	0.085	1	MRPS25	1.16189
PTPRC	0.0694298	0.102232	0.993	1	1	PTPRC	1.15845
RBM8A	0.0695354	0.142131	0.64	0.53	1	RBM8A	1.15779
LNPEP	0.0697178	0.194798	0.353	0.274	1	LNPEP	1.15666
TIMM29	0.0698204	-0.148101	0.073	0.134	1	TIMM29	1.15602
ZNF106	0.0698739	-0.17833	0.2	0.28	1	ZNF106	1.15569
SLC25A5	0.0699714	0.186888	0.593	0.53	1	SLC25A5	1.15508
GLTP	0.0700037	-0.143719	0.133	0.213	1	GLTP	1.15488
SDHB	0.0701216	0.168762	0.233	0.152	1	SDHB	1.15415
SDE2	0.0702236	0.140066	0.127	0.067	1	SDE2	1.15352
NAA60	0.0704959	0.138417	0.12	0.061	1	NAA60	1.15184
ZSCAN16-AS1	0.0705445	-0.175094	0.073	0.134	1	ZSCAN16-AS1	1.15154
PSMD7	0.0705503	0.105396	0.407	0.299	1	PSMD7	1.1515
GART	0.0705732	0.140405	0.16	0.091	1	GART	1.15136
LATS1	0.0709118	0.142996	0.16	0.091	1	LATS1	1.14928
RTF1	0.0710593	-0.186804	0.36	0.439	1	RTF1	1.14838
SLC25A24	0.0713343	0.141053	0.2	0.122	1	SLC25A24	1.1467
MUT	0.0713647	-0.136159	0.053	0.11	1	MUT	1.14652
RAC2	0.0716586	0.148943	0.84	0.823	1	RAC2	1.14473
WDR82	0.0718024	0.132414	0.353	0.256	1	WDR82	1.14386
DHX16	0.0721349	0.161555	0.127	0.067	1	DHX16	1.14185
ZNF281	0.0721567	-0.186785	0.187	0.268	1	ZNF281	1.14172
GLRX3	0.0723584	-0.158026	0.133	0.213	1	GLRX3	1.14051
SLC25A28	0.0723819	-0.143574	0.073	0.134	1	SLC25A28	1.14037
NUDT2	0.0726479	-0.0945621	0.06	0.122	1	NUDT2	1.13878
TPST2	0.0726517	0.0925232	0.293	0.189	1	TPST2	1.13875
UBA6	0.0727254	0.128004	0.2	0.122	1	UBA6	1.13831
CARD16	0.0728735	0.172189	0.4	0.293	1	CARD16	1.13743
NR3C1	0.0729715	-0.177322	0.293	0.378	1	NR3C1	1.13685
MRGBP	0.0731277	-0.171537	0.073	0.134	1	MRGBP	1.13592
SFXN1	0.0733718	-0.201934	0.193	0.268	1	SFXN1	1.13447
FIS1	0.0737825	-0.112814	0.347	0.445	1	FIS1	1.13205
SSSCA1	0.0741377	-0.168486	0.133	0.207	1	SSSCA1	1.12996
SNRPA	0.0741762	-0.166631	0.113	0.183	1	SNRPA	1.12974
HELQ	0.0742738	-0.110426	0.053	0.11	1	HELQ	1.12916
AK6	0.0745024	0.138331	0.173	0.104	1	AK6	1.12783
PSTPIP1	0.0747063	0.164239	0.487	0.396	1	PSTPIP1	1.12664
FAM118A	0.075316	0.139071	0.567	0.451	1	FAM118A	1.12311
ACTR6	0.0757012	0.144978	0.213	0.14	1	ACTR6	1.1209
BICD2	0.0757641	0.0962599	0.113	0.055	1	BICD2	1.12054
CHAMP1	0.0757643	0.107255	0.113	0.055	1	CHAMP1	1.12054
IFNGR1	0.0758913	0.148685	0.287	0.195	1	IFNGR1	1.11981
CNOT6L	0.0758937	0.152051	0.44	0.354	1	CNOT6L	1.11979
MT2A	0.0760752	-0.158933	0.5	0.573	1	MT2A	1.11876
MRPL13	0.0764384	0.101771	0.247	0.165	1	MRPL13	1.11669
BORCS6	0.0764793	0.160487	0.187	0.116	1	BORCS6	1.11646
ACTB	0.0764884	0.0795692	1	1	1	ACTB	1.1164
PNN	0.0765166	-0.145959	0.627	0.701	1	PNN	1.11624
VPS13B	0.0768438	-0.102374	0.053	0.11	1	VPS13B	1.11439
IRF1	0.0769833	0.130657	0.833	0.75	1	IRF1	1.1136
DDX39A	0.0770893	-0.163005	0.213	0.299	1	DDX39A	1.11301
DYRK1A	0.0771296	-0.168759	0.16	0.238	1	DYRK1A	1.11278
CIZ1	0.077199	-0.172382	0.06	0.116	1	CIZ1	1.11239
SEL1L	0.0778214	-0.156717	0.113	0.183	1	SEL1L	1.1089
C4orf48	0.0778934	0.141737	0.293	0.195	1	C4orf48	1.1085
RPS4X	0.077947	0.0740712	0.993	1	1	RPS4X	1.1082
DTYMK	0.0779525	0.134983	0.173	0.104	1	DTYMK	1.10817
AL662844.4	0.0780456	-0.165826	0.06	0.116	1	AL662844.4	1.10765
KPNA1	0.0781257	0.119407	0.127	0.067	1	KPNA1	1.10721
PLEKHJ1	0.0781655	0.160121	0.4	0.299	1	PLEKHJ1	1.10698
RPS16	0.0782625	0.0756652	1	1	1	RPS16	1.10645
CCDC57	0.0783045	-0.128044	0.1	0.171	1	CCDC57	1.10621
SERPINB9	0.0786263	-0.150923	0.207	0.299	1	SERPINB9	1.10443
MXD4	0.07868	0.122907	0.593	0.47	1	MXD4	1.10414
USO1	0.0788254	0.138696	0.207	0.134	1	USO1	1.10333
PPIAL4G	0.0788457	-0.154224	0.087	0.152	1	PPIAL4G	1.10322
ERAP2	0.0790776	0.116265	0.353	0.25	1	ERAP2	1.10195
RINL	0.0791222	-0.177251	0.153	0.226	1	RINL	1.1017
GOLGA3	0.0793713	0.122648	0.127	0.067	1	GOLGA3	1.10034
CTDNEP1	0.0794886	-0.213537	0.247	0.311	1	CTDNEP1	1.0997
RPL23	0.0798691	-0.124585	0.84	0.878	1	RPL23	1.09762
GZMA	0.0800689	0.118912	0.98	0.982	1	GZMA	1.09654
RACK1	0.0802847	0.0925888	1	0.994	1	RACK1	1.09537
OGDH	0.0808606	0.13075	0.133	0.073	1	OGDH	1.09226
TRIM56	0.080889	-0.213311	0.313	0.384	1	TRIM56	1.09211
HSP90AB1	0.0810571	-0.148438	0.793	0.835	1	HSP90AB1	1.09121
RPS18	0.0812575	0.0655736	1	0.994	1	RPS18	1.09014
RPLP2	0.0813661	0.0757518	0.993	0.994	1	RPLP2	1.08956
ELOA	0.0820355	-0.149914	0.08	0.14	1	ELOA	1.086
MKRN1	0.0822562	-0.119423	0.127	0.201	1	MKRN1	1.08483
ATP6V1D	0.0828479	-0.173034	0.173	0.25	1	ATP6V1D	1.08172
HECA	0.0829121	-0.159026	0.113	0.177	1	HECA	1.08138
PPM1K	0.0830018	-0.153425	0.247	0.329	1	PPM1K	1.08091
NUCB2	0.0830345	0.211395	0.48	0.396	1	NUCB2	1.08074
CD7	0.0830414	0.118003	0.593	0.482	1	CD7	1.08071
SF1	0.0835793	-0.127714	0.533	0.628	1	SF1	1.0779
RASA3	0.08384	0.131555	0.18	0.11	1	RASA3	1.07655
PPP3R1	0.0839775	-0.164417	0.087	0.146	1	PPP3R1	1.07584
CLPP	0.0841001	-0.142146	0.213	0.299	1	CLPP	1.0752
ROMO1	0.084249	-0.151786	0.193	0.293	1	ROMO1	1.07444
TENT5C	0.0843768	-0.135362	0.053	0.104	1	TENT5C	1.07378
RBM22	0.08477	-0.15787	0.127	0.195	1	RBM22	1.07176
GTF2A1	0.0848791	-0.13618	0.08	0.14	1	GTF2A1	1.0712
ZNF264	0.0849494	-0.113277	0.093	0.165	1	ZNF264	1.07084
LAMTOR2	0.0852676	0.19956	0.387	0.305	1	LAMTOR2	1.06922
PIGT	0.0853163	-0.148757	0.1	0.165	1	PIGT	1.06897
TRABD	0.085803	0.114513	0.453	0.329	1	TRABD	1.0665
OXA1L	0.0860527	-0.119814	0.127	0.201	1	OXA1L	1.06524
MTDH	0.086082	0.125244	0.693	0.579	1	MTDH	1.06509
KIAA2026	0.086281	-0.208143	0.2	0.268	1	KIAA2026	1.06408
KLF12	0.0863159	-0.131478	0.12	0.189	1	KLF12	1.06391
C12orf10	0.0864055	0.187512	0.227	0.152	1	C12orf10	1.06346
BET1	0.0867108	0.124683	0.147	0.085	1	BET1	1.06193
F2R	0.0867267	0.190366	0.46	0.354	1	F2R	1.06185
RAB8B	0.0868084	-0.16331	0.26	0.348	1	RAB8B	1.06144
ASAP1	0.086935	0.190271	0.2	0.134	1	ASAP1	1.06081
GNL2	0.0869618	0.0930299	0.127	0.067	1	GNL2	1.06067
R3HCC1L	0.0872363	0.114403	0.133	0.073	1	R3HCC1L	1.0593
ERP44	0.0872925	0.173892	0.307	0.232	1	ERP44	1.05902
OSTC	0.0874448	-0.140012	0.3	0.396	1	OSTC	1.05827
SYNE3	0.0875243	0.171673	0.107	0.055	1	SYNE3	1.05787
KIAA1671	0.0878669	-0.120092	0.06	0.116	1	KIAA1671	1.05617
MED28	0.088255	-0.153762	0.18	0.262	1	MED28	1.05426
HSH2D	0.0887767	-0.143777	0.067	0.122	1	HSH2D	1.0517
YTHDC2	0.0888668	0.170611	0.153	0.091	1	YTHDC2	1.05126
MRPS6	0.089307	-0.123646	0.54	0.652	1	MRPS6	1.04911
RIPK1	0.089503	-0.170575	0.107	0.171	1	RIPK1	1.04816
SKAP2	0.0897334	-0.124501	0.133	0.207	1	SKAP2	1.04705
PARP8	0.0898584	0.160418	0.34	0.262	1	PARP8	1.04644
SPTY2D1	0.0898751	0.142604	0.16	0.098	1	SPTY2D1	1.04636
NEMF	0.0901476	-0.147165	0.293	0.372	1	NEMF	1.04505
UBASH3A	0.0901508	-0.208866	0.133	0.201	1	UBASH3A	1.04503
ZFYVE27	0.0902326	-0.104948	0.06	0.116	1	ZFYVE27	1.04464
ARL6IP6	0.0902448	0.134538	0.18	0.11	1	ARL6IP6	1.04458
PRRC2C	0.0902652	-0.149947	0.78	0.811	1	PRRC2C	1.04448
CUL1	0.0903832	0.161033	0.247	0.171	1	CUL1	1.04391
ASXL2	0.0904084	0.151495	0.22	0.146	1	ASXL2	1.04379
SNX18	0.09048	-0.127094	0.107	0.171	1	SNX18	1.04345
TSNAX	0.0905375	0.182268	0.2	0.134	1	TSNAX	1.04317
RNF157	0.0909431	0.147113	0.113	0.061	1	RNF157	1.04123
GOLPH3	0.0911021	0.143759	0.16	0.098	1	GOLPH3	1.04047
NMT2	0.0911881	-0.0901204	0.073	0.134	1	NMT2	1.04006
DDX55	0.0914335	0.155458	0.113	0.061	1	DDX55	1.03889
GSTK1	0.0914491	-0.164927	0.627	0.665	1	GSTK1	1.03882
CDV3	0.0916027	0.1309	0.507	0.421	1	CDV3	1.03809
SCAMP1	0.0916369	-0.0936084	0.073	0.134	1	SCAMP1	1.03793
KLHL9	0.0923427	-0.116276	0.093	0.159	1	KLHL9	1.0346
ATR	0.0935833	0.118067	0.107	0.055	1	ATR	1.0288
RPL36A	0.0936123	0.0891277	0.553	0.476	1	RPL36A	1.02867
RECQL	0.0938464	0.133517	0.307	0.226	1	RECQL	1.02758
C12orf57	0.0941749	-0.15298	0.673	0.738	1	C12orf57	1.02606
GARS	0.0944047	-0.122727	0.067	0.122	1	GARS	1.02501
NOP58	0.0946997	-0.203884	0.293	0.378	1	NOP58	1.02365
UBE2G1	0.0947375	-0.143309	0.14	0.213	1	UBE2G1	1.02348
ZNF101	0.0948457	-0.150426	0.287	0.384	1	ZNF101	1.02298
MAU2	0.0948864	-0.132506	0.067	0.122	1	MAU2	1.0228
EIF2D	0.0951177	-0.0835876	0.06	0.116	1	EIF2D	1.02174
GOLGA7	0.0953537	0.159324	0.28	0.207	1	GOLGA7	1.02066
LGALS3	0.0954176	-0.160789	0.407	0.5	1	LGALS3	1.02037
DOCK10	0.0956455	-0.183261	0.213	0.287	1	DOCK10	1.01934
HDAC1	0.0956753	-0.156497	0.287	0.36	1	HDAC1	1.0192
CGGBP1	0.0957357	-0.170463	0.22	0.293	1	CGGBP1	1.01893
SLF2	0.095906	0.165325	0.173	0.11	1	SLF2	1.01815
PHYKPL	0.0960291	0.17562	0.32	0.238	1	PHYKPL	1.0176
ABHD14B	0.0961879	0.16842	0.22	0.146	1	ABHD14B	1.01688
PDLIM1	0.0962051	-0.13252	0.053	0.104	1	PDLIM1	1.0168
NOP56	0.0962341	0.108199	0.313	0.213	1	NOP56	1.01667
ITSN2	0.0962898	-0.112946	0.253	0.341	1	ITSN2	1.01642
MAP1LC3B	0.096512	0.151799	0.573	0.439	1	MAP1LC3B	1.01542
CWC22	0.0965698	-0.153556	0.153	0.22	1	CWC22	1.01516
USP22	0.0969162	-0.124623	0.12	0.189	1	USP22	1.0136
PRKCQ	0.0972439	-0.142494	0.133	0.201	1	PRKCQ	1.01214
FOXK1	0.0972702	0.104761	0.107	0.055	1	FOXK1	1.01202
H2AFX	0.0972702	-0.109037	0.053	0.104	1	H2AFX	1.01202
MRTO4	0.0973242	-0.116221	0.067	0.122	1	MRTO4	1.01178
SDHC	0.0974077	-0.197454	0.26	0.329	1	SDHC	1.01141
SDHD	0.0974574	-0.17781	0.28	0.354	1	SDHD	1.01119
PHF11	0.0974646	-0.130796	0.28	0.372	1	PHF11	1.01115
PHKG2	0.0974901	-0.157175	0.113	0.177	1	PHKG2	1.01104
SEC23A	0.097885	-0.114862	0.113	0.183	1	SEC23A	1.00928
MTRNR2L8	0.0983447	0.0929404	0.107	0.055	1	MTRNR2L8	1.00725
PRNP	0.0983447	-0.113465	0.053	0.104	1	PRNP	1.00725
DNASE1	0.0985121	-0.139689	0.12	0.189	1	DNASE1	1.00651
AHSA1	0.0987372	-0.141297	0.233	0.317	1	AHSA1	1.00552
KLF3	0.0989383	0.127812	0.147	0.085	1	KLF3	1.00464
IL2RG	0.0989697	0.133784	0.687	0.616	1	IL2RG	1.0045
AHNAK	0.0991153	0.175686	0.693	0.622	1	AHNAK	1.00386
RPF1	0.0991613	-0.135603	0.147	0.226	1	RPF1	1.00366
GINM1	0.099502	0.100845	0.14	0.079	1	GINM1	1.00217
ATP2A3	0.0995499	0.180865	0.193	0.128	1	ATP2A3	1.00196
UBL4A	0.0995544	-0.135094	0.1	0.165	1	UBL4A	1.00194
ENO2	0.0995715	-0.151877	0.06	0.11	1	ENO2	1.00187
MNAT1	0.0995715	-0.161055	0.06	0.11	1	MNAT1	1.00187
TRIM8	0.099734	-0.146743	0.127	0.195	1	TRIM8	1.00116
SLC27A3	0.0999742	-0.107803	0.053	0.104	1	SLC27A3	1.00011
FBXO33	0.0999769	0.0805907	0.14	0.079	1	FBXO33	1.0001
COX14	0.100057	-0.173505	0.34	0.427	1	COX14	0.999753
ZFAND1	0.100099	-0.13457	0.06	0.11	1	ZFAND1	0.999572
LMBR1L	0.100212	-0.0961635	0.06	0.116	1	LMBR1L	0.999079
UBE2H	0.100534	0.124875	0.2	0.128	1	UBE2H	0.997686
ERG28	0.101355	-0.130359	0.12	0.189	1	ERG28	0.994153
MMADHC	0.101385	0.14582	0.253	0.183	1	MMADHC	0.994026
SIK3	0.101484	0.146057	0.22	0.146	1	SIK3	0.993602
CEP57	0.101641	0.157958	0.307	0.226	1	CEP57	0.992932
ZNF43	0.102136	-0.144935	0.08	0.134	1	ZNF43	0.99082
P2RY8	0.102237	0.12669	0.173	0.11	1	P2RY8	0.990392
PRPF8	0.102759	-0.206819	0.273	0.335	1	PRPF8	0.98818
EBLN3P	0.103114	-0.151669	0.147	0.22	1	EBLN3P	0.986683
UBR3	0.103298	-0.0987059	0.053	0.104	1	UBR3	0.985909
COMMD3	0.103532	0.189859	0.287	0.22	1	COMMD3	0.984927
RNPS1	0.104013	-0.10446	0.293	0.384	1	RNPS1	0.982914
CRCP	0.1045	0.132401	0.153	0.091	1	CRCP	0.980885
WDR43	0.104639	-0.183315	0.1	0.159	1	WDR43	0.980306
SAMHD1	0.104645	0.117445	0.487	0.366	1	SAMHD1	0.980281
POM121C	0.104939	-0.107289	0.067	0.122	1	POM121C	0.979063
ASCC3	0.104949	-0.0592164	0.16	0.25	1	ASCC3	0.979022
FBXO22	0.104972	-0.18824	0.16	0.232	1	FBXO22	0.978925
SVBP	0.105185	0.0977619	0.207	0.134	1	SVBP	0.978045
GON4L	0.105316	0.132725	0.313	0.226	1	GON4L	0.977507
SND1	0.105391	0.136928	0.127	0.073	1	SND1	0.977198
HSPH1	0.105414	-0.11621	0.087	0.146	1	HSPH1	0.9771
PGGHG	0.105468	-0.112958	0.073	0.128	1	PGGHG	0.97688
ACO2	0.105508	0.114133	0.16	0.098	1	ACO2	0.976716
SAR1A	0.10563	0.138123	0.307	0.213	1	SAR1A	0.976213
NORAD	0.105811	0.159135	0.207	0.14	1	NORAD	0.97547
MKNK2	0.10607	0.168268	0.287	0.207	1	MKNK2	0.974409
SCAMP1-AS1	0.106491	0.130239	0.12	0.067	1	SCAMP1-AS1	0.972689
MRPL44	0.107225	0.115076	0.187	0.122	1	MRPL44	0.969704
CLK4	0.107614	0.19258	0.28	0.207	1	CLK4	0.968133
SLC39A1	0.10775	-0.119589	0.093	0.152	1	SLC39A1	0.967581
ZNF224	0.107863	-0.163808	0.207	0.28	1	ZNF224	0.967127
PCBP1	0.108372	0.147776	0.68	0.573	1	PCBP1	0.965084
IMPA1	0.108447	0.081513	0.107	0.055	1	IMPA1	0.964783
GNLY	0.108828	0.342543	0.293	0.22	1	GNLY	0.96326
CDK2AP2	0.108872	-0.225399	0.46	0.555	1	CDK2AP2	0.963085
ARFRP1	0.109686	0.157522	0.22	0.152	1	ARFRP1	0.959847
FBXL12	0.109975	0.0867497	0.113	0.061	1	FBXL12	0.958708
SYS1	0.110017	0.129461	0.18	0.11	1	SYS1	0.958542
WAC	0.110022	0.144178	0.407	0.317	1	WAC	0.958521
IMMP1L	0.111118	-0.102699	0.06	0.11	1	IMMP1L	0.954216
BRD1	0.11131	-0.188227	0.127	0.189	1	BRD1	0.953467
SENP1	0.111394	-0.0849531	0.053	0.104	1	SENP1	0.953137
LINC00623	0.111424	0.170185	0.36	0.28	1	LINC00623	0.953023
STX11	0.111547	0.110187	0.167	0.104	1	STX11	0.95254
CYBC1	0.111595	0.126806	0.347	0.274	1	CYBC1	0.952353
MSH3	0.111616	0.144843	0.133	0.079	1	MSH3	0.952272
BIN3	0.111616	0.12732	0.133	0.079	1	BIN3	0.952272
NELFCD	0.11177	-0.197045	0.247	0.317	1	NELFCD	0.951676
GPR183	0.112018	0.174694	0.473	0.354	1	GPR183	0.950711
HGSNAT	0.112135	0.15881	0.14	0.085	1	HGSNAT	0.950259
RCC2	0.112271	-0.107135	0.06	0.11	1	RCC2	0.949734
KCNQ1OT1	0.112271	-0.343903	0.06	0.11	1	KCNQ1OT1	0.949734
TRIR	0.112626	-0.116413	0.747	0.799	1	TRIR	0.948363
UBXN4	0.112663	0.14479	0.667	0.622	1	UBXN4	0.94822
HAVCR2	0.112803	-0.155422	0.073	0.128	1	HAVCR2	0.94768
TMEM199	0.11285	0.0997883	0.113	0.061	1	TMEM199	0.947497
ABLIM1	0.11285	-0.12701	0.06	0.11	1	ABLIM1	0.947497
PHC2	0.112972	0.0967335	0.153	0.091	1	PHC2	0.947031
RASGRP1	0.113031	-0.174281	0.407	0.476	1	RASGRP1	0.946804
SCAF4	0.113081	-0.133326	0.093	0.152	1	SCAF4	0.94661
UBR4	0.113081	-0.142961	0.093	0.152	1	UBR4	0.94661
ATM	0.113112	-0.110763	0.647	0.665	1	ATM	0.946492
H2AFZ	0.113426	-0.120277	0.707	0.78	1	H2AFZ	0.945289
CHI3L2	0.113433	-0.15357	0.06	0.11	1	CHI3L2	0.945262
MT1F	0.113641	0.140348	0.273	0.195	1	MT1F	0.944466
CBLB	0.11365	0.200422	0.34	0.256	1	CBLB	0.944432
CHRAC1	0.113687	0.158378	0.14	0.085	1	CHRAC1	0.94429
GOLGA1	0.113797	-0.097084	0.053	0.104	1	GOLGA1	0.943868
RPL34	0.113869	0.0593059	0.987	1	1	RPL34	0.943594
FKBP5	0.113883	-0.0985877	0.073	0.128	1	FKBP5	0.943542
UBAC1	0.114225	0.0927301	0.153	0.091	1	UBAC1	0.942239
HDAC7	0.114225	-0.137659	0.067	0.116	1	HDAC7	0.942238
EMC6	0.114347	-0.146972	0.327	0.402	1	EMC6	0.941776
MSMO1	0.114535	-0.136353	0.1	0.159	1	MSMO1	0.941062
TRGC1	0.114557	0.0840601	0.147	0.085	1	TRGC1	0.940979
LINC002481	0.114809	0.116119	0.133	0.079	1	LINC002481	0.940025
ATP5F1D	0.115135	0.110503	0.76	0.695	1	ATP5F1D	0.938794
HDLBP	0.115252	-0.1613	0.12	0.183	1	HDLBP	0.938351
ZNF787	0.115325	0.13939	0.147	0.091	1	ZNF787	0.938075
MARK2	0.115566	-0.219952	0.173	0.226	1	MARK2	0.937171
RPS12	0.115586	0.0619609	1	1	1	RPS12	0.937093
CD70	0.115823	-0.104489	0.093	0.152	1	CD70	0.936204
TMEM203	0.115824	-0.102883	0.173	0.256	1	TMEM203	0.936201
RNF41	0.116141	0.108506	0.127	0.073	1	RNF41	0.935014
ACADM	0.116508	-0.134174	0.127	0.195	1	ACADM	0.933646
SEC23B	0.116515	0.0981314	0.12	0.067	1	SEC23B	0.93362
MED1	0.116515	-0.125219	0.067	0.116	1	MED1	0.93362
CXorf38	0.11679	-0.132957	0.167	0.238	1	CXorf38	0.932596
C1orf56	0.117003	-0.134145	0.28	0.366	1	C1orf56	0.931802
HBP1	0.117099	0.14412	0.187	0.122	1	HBP1	0.931449
LPGAT1	0.117158	-0.0987049	0.133	0.201	1	LPGAT1	0.931229
AKTIP	0.117208	-0.150886	0.193	0.262	1	AKTIP	0.931044
NSMCE2	0.117262	0.108211	0.127	0.073	1	NSMCE2	0.930843
ITM2A	0.117384	-0.115598	0.613	0.652	1	ITM2A	0.930392
HACD4	0.117714	-0.135452	0.153	0.226	1	HACD4	0.929172
HGS	0.117727	-0.104994	0.073	0.128	1	HGS	0.929126
EIF3J-DT	0.117838	0.105788	0.213	0.14	1	EIF3J-DT	0.928715
XBP1	0.117892	0.166905	0.247	0.177	1	XBP1	0.928517
APOBEC3G	0.118265	-0.111875	0.907	0.939	1	APOBEC3G	0.927145
NUMA1	0.118411	0.134056	0.207	0.14	1	NUMA1	0.926608
DPM3	0.118546	-0.198471	0.113	0.165	1	DPM3	0.926113
TOB2	0.119085	-0.143543	0.107	0.165	1	TOB2	0.924141
LINC00847	0.119427	-0.146479	0.067	0.116	1	LINC00847	0.922899
TRAF3IP3	0.119442	-0.165964	0.687	0.659	1	TRAF3IP3	0.922843
FYTTD1	0.119653	0.182088	0.213	0.146	1	FYTTD1	0.922075
CHMP4A	0.119774	0.119178	0.56	0.451	1	CHMP4A	0.921636
MRPS35	0.119891	-0.125658	0.113	0.171	1	MRPS35	0.921212
GIMAP2	0.1199	-0.191698	0.327	0.415	1	GIMAP2	0.921181
NUDT1	0.120228	-0.147113	0.267	0.341	1	NUDT1	0.919994
CMTM6	0.120242	-0.207692	0.26	0.323	1	CMTM6	0.919943
ABCF1	0.120538	0.167192	0.367	0.287	1	ABCF1	0.918876
MRPL18	0.120607	-0.15465	0.227	0.293	1	MRPL18	0.918627
CCDC82	0.120756	-0.0893086	0.22	0.317	1	CCDC82	0.918091
CEP250	0.120775	-0.11321	0.08	0.134	1	CEP250	0.918022
MRPL19	0.12093	0.0971809	0.22	0.152	1	MRPL19	0.917465
BLOC1S2	0.121078	-0.132929	0.187	0.262	1	BLOC1S2	0.916935
COMTD1	0.121203	-0.118531	0.093	0.152	1	COMTD1	0.916485
USP28	0.121424	0.1453	0.22	0.146	1	USP28	0.915697
MED13	0.121813	0.1404	0.227	0.159	1	MED13	0.914308
NELFE	0.121849	-0.140164	0.113	0.171	1	NELFE	0.914179
VAMP2	0.121957	-0.116142	0.607	0.707	1	VAMP2	0.913795
U2SURP	0.122141	-0.120487	0.367	0.463	1	U2SURP	0.913139
FLI1	0.122174	0.0954039	0.193	0.122	1	FLI1	0.913022
DENND1C	0.122802	0.123314	0.14	0.085	1	DENND1C	0.910793
RNF169	0.122873	-0.103412	0.113	0.177	1	RNF169	0.910543
BRAP	0.122996	-0.130933	0.067	0.116	1	BRAP	0.910109
CES2	0.122996	-0.13774	0.067	0.116	1	CES2	0.910109
HIC1	0.123073	-0.104631	0.06	0.11	1	HIC1	0.909837
CUL5	0.123622	0.112166	0.233	0.165	1	CUL5	0.907905
REPIN1	0.123696	-0.0784316	0.06	0.11	1	REPIN1	0.907643
NAAA	0.123994	0.0759258	0.173	0.11	1	NAAA	0.9066
CPSF3	0.124322	-0.100324	0.06	0.11	1	CPSF3	0.905452
SLC52A2	0.124863	-0.090249	0.107	0.165	1	SLC52A2	0.903566
RHOG	0.125306	0.118145	0.4	0.293	1	RHOG	0.902029
TMEM205	0.125347	-0.150239	0.073	0.122	1	TMEM205	0.901886
THADA	0.12546	-0.153923	0.093	0.146	1	THADA	0.901495
PUS7L	0.125464	0.150064	0.247	0.177	1	PUS7L	0.90148
PAXX	0.125735	0.107182	0.633	0.555	1	PAXX	0.900544
HERPUD1	0.125879	0.111078	0.567	0.439	1	HERPUD1	0.900047
SNW1	0.125963	-0.142179	0.26	0.335	1	SNW1	0.899757
MYO9A	0.125971	0.11284	0.133	0.079	1	MYO9A	0.899728
MIEF1	0.126034	-0.120562	0.067	0.116	1	MIEF1	0.899513
EIF4E2	0.126159	0.139993	0.253	0.189	1	EIF4E2	0.89908
ENTPD4	0.12623	0.109658	0.147	0.091	1	ENTPD4	0.898837
AL133453.1	0.126548	0.0993412	0.193	0.128	1	AL133453.1	0.897746
CRNKL1	0.126777	0.158377	0.153	0.098	1	CRNKL1	0.89696
CYCS	0.126811	-0.147735	0.373	0.463	1	CYCS	0.896845
SMAP2	0.127126	0.161415	0.387	0.305	1	SMAP2	0.895765
GDF11	0.127135	-0.129083	0.073	0.122	1	GDF11	0.895735
ZNF277	0.127265	-0.107857	0.067	0.116	1	ZNF277	0.89529
CHMP2B	0.127277	-0.127655	0.127	0.189	1	CHMP2B	0.89525
TOR1AIP1	0.127314	-0.181616	0.193	0.256	1	TOR1AIP1	0.895125
SURF2	0.127618	-0.14404	0.16	0.226	1	SURF2	0.894087
RPS3	0.127715	0.0434757	1	1	1	RPS3	0.893757
GPR82	0.127791	-0.121169	0.1	0.159	1	GPR82	0.893501
RNF168	0.12833	0.105187	0.293	0.207	1	RNF168	0.891672
TMED9	0.1286	-0.150367	0.347	0.415	1	TMED9	0.890759
RPAP3	0.129077	0.0529144	0.16	0.098	1	RPAP3	0.88915
SCAMP4	0.129093	0.0393249	0.113	0.061	1	SCAMP4	0.889098
CHD8	0.129165	-0.112206	0.18	0.256	1	CHD8	0.888854
OGFR	0.129308	0.112752	0.333	0.25	1	OGFR	0.888375
COQ4	0.129576	0.0845669	0.153	0.091	1	COQ4	0.887477
PPP3CC	0.12985	0.117347	0.147	0.091	1	PPP3CC	0.886556
LAMTOR3	0.130063	-0.118141	0.107	0.165	1	LAMTOR3	0.885847
GBP1	0.130413	0.171221	0.353	0.28	1	GBP1	0.884678
SCAF11	0.130429	0.13774	0.653	0.604	1	SCAF11	0.884626
RAB18	0.130444	-0.164547	0.173	0.238	1	RAB18	0.884577
GMFG	0.130555	0.112578	0.86	0.823	1	GMFG	0.884206
PNKD	0.130728	-0.182986	0.207	0.268	1	PNKD	0.883633
SCAMP3	0.13073	0.0918593	0.14	0.085	1	SCAMP3	0.883625
RPL22	0.131595	0.0805637	0.933	0.933	1	RPL22	0.880762
PRKAR1A	0.131755	0.115047	0.313	0.238	1	PRKAR1A	0.880234
PIGX	0.131891	0.124353	0.12	0.073	1	PIGX	0.879786
YWHAE	0.131904	0.173232	0.407	0.335	1	YWHAE	0.879744
TCF7	0.131935	0.179484	0.373	0.293	1	TCF7	0.87964
PCGF5	0.13206	0.129971	0.247	0.177	1	PCGF5	0.87923
CWC25	0.132241	0.10059	0.247	0.171	1	CWC25	0.878634
INTS6	0.13263	0.102007	0.307	0.232	1	INTS6	0.877358
RBM6	0.13272	-0.0798858	0.247	0.335	1	RBM6	0.877064
SLC9A3R1	0.13277	-0.129966	0.347	0.421	1	SLC9A3R1	0.876901
RPL36	0.132771	0.06545	0.993	0.976	1	RPL36	0.876898
EPN1	0.132819	-0.070357	0.08	0.134	1	EPN1	0.876741
ADD1	0.132852	0.136361	0.373	0.287	1	ADD1	0.876633
UBE2L3	0.13286	0.166125	0.527	0.457	1	UBE2L3	0.876606
SLC2A3	0.133374	0.198134	0.24	0.177	1	SLC2A3	0.87493
JHY	0.133527	0.142271	0.113	0.067	1	JHY	0.87443
MBD5	0.133603	-0.13343	0.14	0.207	1	MBD5	0.874183
PHF14	0.133608	-0.144495	0.22	0.293	1	PHF14	0.874169
STX12	0.13379	0.101677	0.18	0.116	1	STX12	0.873576
GPR171	0.133841	0.148373	0.627	0.53	1	GPR171	0.87341
TMEM245	0.133926	0.133222	0.18	0.122	1	TMEM245	0.873135
RAD51D	0.134003	0.125116	0.107	0.061	1	RAD51D	0.872886
RBM12	0.134086	-0.114356	0.087	0.14	1	RBM12	0.872615
ZC3H4	0.134234	0.138822	0.153	0.098	1	ZC3H4	0.872139
ARHGAP35	0.135157	0.159418	0.167	0.11	1	ARHGAP35	0.869162
BAZ1B	0.13534	0.0911319	0.393	0.305	1	BAZ1B	0.868573
E2F3	0.135471	0.0974884	0.26	0.189	1	E2F3	0.868154
RPA3	0.135675	0.146139	0.267	0.201	1	RPA3	0.8675
RPL26	0.135846	0.0637757	1	1	1	RPL26	0.866953
TROVE2	0.135891	0.210027	0.267	0.213	1	TROVE2	0.866808
EAF1	0.136148	-0.0954938	0.067	0.116	1	EAF1	0.865988
TBPL1	0.136205	-0.176873	0.16	0.22	1	TBPL1	0.865807
CDKN1B	0.136493	-0.123222	0.26	0.348	1	CDKN1B	0.86489
TTC3	0.136616	-0.140841	0.327	0.415	1	TTC3	0.864499
TNPO1	0.136797	-0.135747	0.107	0.165	1	TNPO1	0.863923
YWHAQ	0.136864	-0.112323	0.387	0.47	1	YWHAQ	0.86371
OSBPL8	0.136969	0.215719	0.327	0.268	1	OSBPL8	0.863376
SCO1	0.13708	0.105441	0.153	0.098	1	SCO1	0.863026
COTL1	0.13718	0.0559888	0.873	0.86	1	COTL1	0.862709
ZCCHC8	0.137252	-0.161675	0.107	0.159	1	ZCCHC8	0.862481
CEP164	0.137359	-0.0724742	0.06	0.11	1	CEP164	0.862141
METTL23	0.137371	0.135964	0.447	0.384	1	METTL23	0.862104
GIPC1	0.137373	0.114422	0.173	0.11	1	GIPC1	0.862097
RPL3	0.137486	0.0622098	1	1	1	RPL3	0.861741
HMG20B	0.137842	0.096594	0.207	0.14	1	HMG20B	0.86062
SRP72	0.137867	-0.18074	0.287	0.341	1	SRP72	0.860539
GMCL1	0.138093	-0.0790555	0.14	0.201	1	GMCL1	0.859829
PIGH	0.138257	-0.108018	0.08	0.134	1	PIGH	0.859314
WAPL	0.138257	-0.127643	0.207	0.274	1	WAPL	0.859312
FRMD4B	0.138584	-0.15628	0.08	0.128	1	FRMD4B	0.858288
MAD2L1	0.139147	-0.13639	0.06	0.104	1	MAD2L1	0.856525
CD58	0.139174	-0.104274	0.16	0.232	1	CD58	0.856443
NACA	0.139306	0.0641046	0.993	0.97	1	NACA	0.856029
ZNF652	0.139518	-0.119073	0.167	0.232	1	ZNF652	0.855369
SLC4A7	0.139736	-0.123977	0.26	0.348	1	SLC4A7	0.854692
TERF2	0.13976	-0.054709	0.073	0.128	1	TERF2	0.854619
HMGB2	0.14008	0.145558	0.467	0.378	1	HMGB2	0.853623
CD8A	0.140376	-0.113585	0.767	0.793	1	CD8A	0.852708
ZNF322	0.141093	-0.156994	0.08	0.128	1	ZNF322	0.850496
RPS14	0.141485	0.0499902	1	1	1	RPS14	0.849291
ARID5A	0.141498	0.170371	0.327	0.256	1	ARID5A	0.849251
PPP2CA	0.141677	0.101574	0.333	0.244	1	PPP2CA	0.848702
AP002387.2	0.14171	-0.104558	0.113	0.171	1	AP002387.2	0.848599
GON7	0.142107	-0.0889023	0.067	0.116	1	GON7	0.847385
SRSF8	0.142615	-0.193786	0.213	0.274	1	SRSF8	0.845835
NUTF2	0.142633	-0.154895	0.113	0.165	1	NUTF2	0.84578
ST3GAL2	0.143458	-0.0693821	0.067	0.116	1	ST3GAL2	0.843276
CD2AP	0.143772	0.170769	0.173	0.122	1	CD2AP	0.842327
CSGALNACT2	0.143938	0.132751	0.173	0.116	1	CSGALNACT2	0.841825
CCDC97	0.143938	-0.0873243	0.113	0.171	1	CCDC97	0.841825
YTHDF1	0.144137	-0.090797	0.067	0.116	1	YTHDF1	0.841225
ADPGK	0.144356	-0.118794	0.093	0.146	1	ADPGK	0.840565
UBC	0.144369	0.0966111	0.987	0.976	1	UBC	0.840526
FLOT2	0.144498	-0.0856235	0.08	0.134	1	FLOT2	0.840138
U2AF1L4	0.144498	-0.105074	0.08	0.134	1	U2AF1L4	0.840138
MTCH2	0.144563	-0.109648	0.187	0.25	1	MTCH2	0.839943
KCTD17	0.144819	-0.0700534	0.067	0.116	1	KCTD17	0.839176
CAPN10	0.144967	0.107178	0.113	0.067	1	CAPN10	0.838731
NDUFAB1	0.145272	0.0940035	0.513	0.409	1	NDUFAB1	0.837818
PGP	0.145605	0.199001	0.367	0.299	1	PGP	0.836824
MYBL1	0.145663	0.0924555	0.113	0.067	1	MYBL1	0.836652
CDCA7	0.145866	-0.166812	0.087	0.134	1	CDCA7	0.836045
ARID5B	0.145982	0.166104	0.353	0.274	1	ARID5B	0.8357
BNIP3	0.146221	0.127743	0.12	0.073	1	BNIP3	0.834989
DPH3	0.146298	0.158905	0.16	0.104	1	DPH3	0.834763
ATAD1	0.146326	-0.11334	0.153	0.22	1	ATAD1	0.834678
UBE2J1	0.146361	0.113406	0.113	0.067	1	UBE2J1	0.834575
QDPR	0.146361	0.105918	0.113	0.067	1	QDPR	0.834575
APOBEC3H	0.146392	0.14787	0.333	0.256	1	APOBEC3H	0.834481
PPP6R1	0.146583	-0.137539	0.26	0.329	1	PPP6R1	0.833917
RALGAPB	0.1469	0.127783	0.12	0.073	1	RALGAPB	0.832978
MAP4	0.146911	0.152317	0.42	0.341	1	MAP4	0.832944
RPL39	0.146954	0.0496039	0.98	1	1	RPL39	0.832819
EXOC1	0.147044	-0.119657	0.113	0.171	1	EXOC1	0.832551
TMEM258	0.147496	-0.143281	0.407	0.47	1	TMEM258	0.831219
RBM15B	0.147765	0.11102	0.113	0.067	1	RBM15B	0.830429
CLN5	0.148423	-0.123802	0.06	0.104	1	CLN5	0.828499
SLC25A38	0.148502	0.175118	0.18	0.128	1	SLC25A38	0.828268
GTDC1	0.148789	0.1235	0.107	0.061	1	GTDC1	0.827429
SMC4	0.149138	-0.152266	0.213	0.299	1	SMC4	0.826411
RBM3	0.149473	0.168787	0.38	0.329	1	RBM3	0.825437
PLEKHA5	0.149487	0.094191	0.147	0.091	1	PLEKHA5	0.825397
STMP1	0.149801	-0.133942	0.28	0.341	1	STMP1	0.824484
EIF2S1	0.15005	0.100307	0.273	0.201	1	EIF2S1	0.823765
FLYWCH2	0.15008	-0.149546	0.113	0.165	1	FLYWCH2	0.823677
IRAK1	0.150251	0.115081	0.18	0.122	1	IRAK1	0.823183
UBE2Q2	0.15033	0.134868	0.12	0.073	1	UBE2Q2	0.822956
APMAP	0.150397	-0.171224	0.36	0.415	1	APMAP	0.822762
ZMYND8	0.150475	0.118205	0.16	0.104	1	ZMYND8	0.822535
METRN	0.15062	0.123797	0.187	0.128	1	METRN	0.822118
PIM1	0.150702	-0.148601	0.213	0.28	1	PIM1	0.821881
CLTA	0.150765	-0.111624	0.5	0.555	1	CLTA	0.8217
HLA-E	0.150807	0.0640823	0.98	0.988	1	HLA-E	0.82158
SMARCC2	0.150972	0.143834	0.287	0.22	1	SMARCC2	0.821104
NCOA2	0.150994	0.0942094	0.193	0.128	1	NCOA2	0.821042
TBC1D17	0.151065	-0.0724263	0.067	0.116	1	TBC1D17	0.820837
VIM	0.151139	-0.104073	0.953	0.951	1	VIM	0.820624
PRMT2	0.151161	-0.0934951	0.427	0.5	1	PRMT2	0.820559
LSM2	0.151199	0.179874	0.393	0.323	1	LSM2	0.82045
P2RX5	0.15132	0.0850345	0.113	0.067	1	P2RX5	0.820104
MED17	0.151479	-0.139513	0.08	0.128	1	MED17	0.819648
ZC3HAV1	0.151556	0.112308	0.347	0.268	1	ZC3HAV1	0.819428
UGCG	0.152293	0.135505	0.16	0.104	1	UGCG	0.81732
ZNF622	0.152395	-0.125537	0.16	0.22	1	ZNF622	0.81703
MPST	0.152503	-0.105033	0.1	0.152	1	MPST	0.816721
GLRX	0.152615	-0.10891	0.26	0.335	1	GLRX	0.816402
ELOF1	0.152655	0.132257	0.227	0.159	1	ELOF1	0.81629
ICAM3	0.152703	0.121645	0.707	0.591	1	ICAM3	0.816153
TPT1	0.152762	0.0377157	1	1	1	TPT1	0.815983
SMIM15	0.15294	0.145275	0.293	0.238	1	SMIM15	0.815479
RAPGEF6	0.153117	0.106534	0.12	0.073	1	RAPGEF6	0.814977
UBE2Z	0.153343	0.122442	0.24	0.171	1	UBE2Z	0.814335
MPHOSPH9	0.153795	-0.144452	0.16	0.226	1	MPHOSPH9	0.813058
WTAP	0.153817	-0.140561	0.333	0.415	1	WTAP	0.812996
CKAP5	0.153887	0.0948728	0.153	0.098	1	CKAP5	0.812799
HIPK1	0.154172	-0.137378	0.073	0.116	1	HIPK1	0.811994
PTEN	0.154246	0.132736	0.273	0.207	1	PTEN	0.811786
CASP8	0.154369	0.142557	0.427	0.341	1	CASP8	0.811439
PDCD1	0.15456	-0.151935	0.12	0.177	1	PDCD1	0.810903
MIR155HG	0.154607	-0.203336	0.12	0.171	1	MIR155HG	0.810771
RAB28	0.154622	-0.0770697	0.067	0.116	1	RAB28	0.810728
HIF1A	0.154803	0.128247	0.313	0.232	1	HIF1A	0.810222
SSR1	0.154803	-0.163199	0.233	0.305	1	SSR1	0.810222
UTRN	0.155009	0.155038	0.453	0.396	1	UTRN	0.809644
PIH1D1	0.155103	-0.160683	0.187	0.238	1	PIH1D1	0.80938
FXYD5	0.155521	-0.122991	0.48	0.555	1	FXYD5	0.808211
PSMA3-AS1	0.155744	-0.122147	0.433	0.53	1	PSMA3-AS1	0.807588
TMEM170A	0.156003	0.205304	0.193	0.14	1	TMEM170A	0.806867
NAGK	0.156233	-0.121665	0.1	0.152	1	NAGK	0.806228
USP7	0.156504	0.0563452	0.32	0.232	1	USP7	0.805474
CNN2	0.156627	0.0773948	0.38	0.305	1	CNN2	0.805132
RNF114	0.156714	0.0665984	0.233	0.165	1	RNF114	0.804892
TMEM183A	0.157084	-0.111962	0.087	0.14	1	TMEM183A	0.803869
NBDY	0.157355	0.0990318	0.307	0.238	1	NBDY	0.803119
TAZ	0.15757	-0.133689	0.087	0.134	1	TAZ	0.802525
HNRNPA3	0.15767	-0.0974906	0.727	0.762	1	HNRNPA3	0.80225
ARGLU1	0.157703	-0.109196	0.62	0.689	1	ARGLU1	0.802159
GIMAP6	0.157975	-0.160645	0.327	0.39	1	GIMAP6	0.801412
DGKD	0.158089	0.113762	0.12	0.073	1	DGKD	0.801099
IFT27	0.158164	-0.0789753	0.06	0.104	1	IFT27	0.800893
TMEM127	0.158253	-0.13712	0.067	0.11	1	TMEM127	0.800647
HPS1	0.15826	0.0594552	0.133	0.079	1	HPS1	0.800629
RNMT	0.158447	0.154852	0.313	0.25	1	RNMT	0.800117
SPATA13	0.15915	-0.127007	0.247	0.317	1	SPATA13	0.798194
ATP5F1E	0.159469	-0.0742812	0.967	0.957	1	ATP5F1E	0.797323
NELL2	0.159588	-0.155253	0.087	0.134	1	NELL2	0.796999
RPS9	0.159665	0.0531223	0.993	1	1	RPS9	0.796789
VDAC3	0.159667	0.126879	0.38	0.305	1	VDAC3	0.796786
ZNF451	0.160107	-0.127521	0.153	0.213	1	ZNF451	0.795588
ENY2	0.160513	-0.142146	0.327	0.384	1	ENY2	0.794489
RSPRY1	0.160555	0.121151	0.127	0.079	1	RSPRY1	0.794377
USP36	0.160723	0.142799	0.147	0.098	1	USP36	0.793921
FAM98B	0.161349	-0.108163	0.12	0.177	1	FAM98B	0.792234
SRSF9	0.161528	0.109257	0.713	0.61	1	SRSF9	0.791752
DMWD	0.161714	0.0746758	0.12	0.073	1	DMWD	0.791252
SRSF3	0.161798	0.108491	0.713	0.659	1	SRSF3	0.791028
STK39	0.161956	0.137987	0.153	0.104	1	STK39	0.790602
DNAJC17	0.161973	0.139624	0.127	0.079	1	DNAJC17	0.790558
RCN2	0.162086	0.122909	0.333	0.268	1	RCN2	0.790255
SLC38A10	0.162428	0.110473	0.133	0.085	1	SLC38A10	0.789339
DDX3X	0.162596	0.156577	0.56	0.506	1	DDX3X	0.788891
ERICH1	0.162626	0.129862	0.32	0.256	1	ERICH1	0.788809
PTGES3	0.162708	-0.151095	0.673	0.683	1	PTGES3	0.788592
TYW3	0.16298	0.141916	0.173	0.122	1	TYW3	0.787865
IFNG-AS1	0.163182	0.109978	0.12	0.073	1	IFNG-AS1	0.787327
LUC7L3	0.163311	-0.0908707	0.673	0.744	1	LUC7L3	0.786985
CTDSP2	0.163568	-0.164613	0.127	0.177	1	CTDSP2	0.786302
SATB1	0.164	0.0681484	0.107	0.061	1	SATB1	0.785157
CABIN1	0.164168	-0.112772	0.147	0.207	1	CABIN1	0.784712
LMAN1	0.164405	0.143024	0.333	0.268	1	LMAN1	0.784086
PCYT1A	0.164551	-0.110731	0.1	0.152	1	PCYT1A	0.783701
PRF1	0.164798	0.130546	0.593	0.549	1	PRF1	0.783048
CD48	0.165139	0.0734462	0.867	0.835	1	CD48	0.78215
MAD2L2	0.165361	0.11236	0.147	0.098	1	MAD2L2	0.781568
MLH1	0.165425	0.0856436	0.113	0.067	1	MLH1	0.7814
CD81	0.165721	0.0596016	0.907	0.866	1	CD81	0.780624
TECR	0.165797	-0.120848	0.327	0.39	1	TECR	0.780424
IMPDH1	0.165811	0.105727	0.167	0.11	1	IMPDH1	0.780387
COMMD7	0.165859	0.11624	0.373	0.299	1	COMMD7	0.78026
FKBP8	0.166094	0.113332	0.587	0.506	1	FKBP8	0.779647
SNRPB2	0.166161	-0.0829496	0.36	0.421	1	SNRPB2	0.779472
SMAD2	0.166347	-0.152371	0.153	0.207	1	SMAD2	0.778985
LSM6	0.166368	0.108509	0.467	0.372	1	LSM6	0.778931
NSD3	0.166769	-0.129181	0.353	0.439	1	NSD3	0.777884
KIAA0040	0.166786	0.129656	0.193	0.134	1	KIAA0040	0.777842
VDAC1	0.166838	0.115444	0.447	0.36	1	VDAC1	0.777704
WAC-AS1	0.167176	0.122943	0.153	0.104	1	WAC-AS1	0.776827
RERE	0.167578	-0.102629	0.06	0.104	1	RERE	0.775783
TM9SF2	0.167586	0.0626899	0.213	0.146	1	TM9SF2	0.775761
RAP1GDS1	0.167727	-0.149098	0.113	0.159	1	RAP1GDS1	0.775396
ANAPC4	0.167739	0.085998	0.113	0.067	1	ANAPC4	0.775365
CNPY3	0.167756	0.116404	0.267	0.201	1	CNPY3	0.775322
EML3	0.16847	0.107831	0.127	0.079	1	EML3	0.773476
MAPK1	0.168748	0.133643	0.293	0.226	1	MAPK1	0.772761
ARPC4	0.169155	-0.158865	0.427	0.476	1	ARPC4	0.771715
AQR	0.169176	0.10038	0.193	0.134	1	AQR	0.771661
TNK2	0.169187	-0.0815576	0.06	0.104	1	TNK2	0.771633
UHMK1	0.169721	0.130128	0.247	0.183	1	UHMK1	0.770263
PNPT1	0.169903	-0.128307	0.107	0.159	1	PNPT1	0.769798
SYNC	0.169911	0.104588	0.12	0.073	1	SYNC	0.769778
QKI	0.169941	0.0952301	0.127	0.079	1	QKI	0.769703
RC3H1	0.169941	0.0940562	0.127	0.079	1	RC3H1	0.769703
TXLNG	0.170672	0.0961742	0.12	0.073	1	TXLNG	0.767839
NUP153	0.170783	0.120886	0.147	0.098	1	NUP153	0.767555
RXRB	0.170808	-0.0810623	0.06	0.104	1	RXRB	0.767492
CDC42	0.170955	0.115208	0.787	0.744	1	CDC42	0.767119
NAA20	0.171079	-0.123853	0.187	0.244	1	NAA20	0.766803
BCL2	0.171102	-0.148872	0.247	0.311	1	BCL2	0.766746
USB1	0.171173	-0.0831844	0.1	0.152	1	USB1	0.766566
HIST1H1C	0.171347	-0.145625	0.18	0.244	1	HIST1H1C	0.766123
JMJD1C	0.171554	0.149905	0.28	0.213	1	JMJD1C	0.765599
CRTC3	0.1716	-0.115517	0.113	0.165	1	CRTC3	0.765483
GPN1	0.171622	-0.0825089	0.06	0.104	1	GPN1	0.765426
HPS5	0.171638	0.109449	0.133	0.085	1	HPS5	0.765387
ANKFY1	0.171638	0.0970829	0.133	0.085	1	ANKFY1	0.765387
SOD2	0.171651	0.0750553	0.113	0.067	1	SOD2	0.765353
RIOK3	0.171789	0.137616	0.24	0.177	1	RIOK3	0.765006
ATP8A1	0.172096	0.129986	0.233	0.171	1	ATP8A1	0.76423
QRICH1	0.172838	-0.107614	0.067	0.11	1	QRICH1	0.762361
EPHA1	0.172899	-0.153097	0.1	0.146	1	EPHA1	0.762208
TRMT13	0.173199	-0.0933726	0.107	0.159	1	TRMT13	0.761456
KDM1A	0.173199	-0.121188	0.107	0.159	1	KDM1A	0.761455
PAIP1	0.173602	0.150718	0.173	0.122	1	PAIP1	0.760445
ETHE1	0.173863	0.119507	0.16	0.11	1	ETHE1	0.759792
MAPK14	0.174265	-0.10666	0.087	0.134	1	MAPK14	0.75879
NFKBIA	0.174598	-0.118917	0.307	0.372	1	NFKBIA	0.757961
PRKCSH	0.174896	0.099649	0.167	0.11	1	PRKCSH	0.757219
NUP210	0.174907	-0.121966	0.167	0.232	1	NUP210	0.757193
PREX1	0.175009	-0.166946	0.253	0.311	1	PREX1	0.75694
RNF149	0.17511	0.102188	0.307	0.238	1	RNF149	0.75669
SRP68	0.175383	0.114312	0.2	0.14	1	SRP68	0.756014
ATRX	0.17544	-0.0798271	0.587	0.671	1	ATRX	0.75587
VAPA	0.175766	0.109672	0.513	0.445	1	VAPA	0.755065
TIMM17B	0.17661	0.11069	0.233	0.171	1	TIMM17B	0.752985
SUPT16H	0.177036	-0.161238	0.347	0.39	1	SUPT16H	0.751937
TMEM69	0.177055	-0.14157	0.08	0.122	1	TMEM69	0.751891
ISCU	0.177081	-0.0975866	0.487	0.518	1	ISCU	0.751827
CCM2	0.177148	-0.0969772	0.353	0.439	1	CCM2	0.751665
SLC25A39	0.177309	0.122025	0.187	0.134	1	SLC25A39	0.75127
EXOSC9	0.177309	-0.165822	0.193	0.244	1	EXOSC9	0.75127
POLE4	0.177375	0.15947	0.247	0.189	1	POLE4	0.751109
LCP2	0.177486	0.16145	0.447	0.39	1	LCP2	0.750836
TM7SF3	0.177992	-0.102529	0.1	0.152	1	TM7SF3	0.749599
KPNA2	0.178455	0.0977287	0.147	0.098	1	KPNA2	0.748471
SHKBP1	0.178556	0.12274	0.26	0.201	1	SHKBP1	0.748227
SLC20A1	0.178936	0.132849	0.307	0.238	1	SLC20A1	0.747302
DMTF1	0.179223	-0.100108	0.16	0.22	1	DMTF1	0.746607
FUT8	0.179271	-0.11142	0.067	0.11	1	FUT8	0.74649
FBXL3	0.179284	0.110881	0.14	0.091	1	FBXL3	0.746459
TRAPPC2B	0.179328	-0.117051	0.113	0.171	1	TRAPPC2B	0.746353
LPCAT1	0.179822	-0.0980887	0.147	0.201	1	LPCAT1	0.745157
CLIP4	0.179933	-0.0995638	0.107	0.159	1	CLIP4	0.74489
CNP	0.180502	0.0829705	0.127	0.079	1	CNP	0.743518
ISG20L2	0.180654	0.0388202	0.173	0.116	1	ISG20L2	0.743152
PUM2	0.181045	0.140151	0.207	0.146	1	PUM2	0.742214
MMP25-AS1	0.181201	-0.104394	0.187	0.25	1	MMP25-AS1	0.741839
TAF8	0.181988	0.112447	0.133	0.085	1	TAF8	0.739958
BTN2A1	0.18205	0.0749824	0.127	0.079	1	BTN2A1	0.73981
CEBPG	0.182139	0.147253	0.113	0.073	1	CEBPG	0.739598
CDK4	0.182175	-0.0889376	0.113	0.165	1	CDK4	0.739512
DNAJB2	0.182271	-0.0878216	0.08	0.128	1	DNAJB2	0.739283
PAPOLA	0.182481	0.110136	0.513	0.433	1	PAPOLA	0.738782
CCDC12	0.182498	0.128513	0.52	0.433	1	CCDC12	0.738741
MFSD11	0.182554	-0.0889297	0.067	0.11	1	MFSD11	0.738609
C1orf52	0.18268	0.127329	0.16	0.11	1	C1orf52	0.738309
HPS3	0.183004	-0.149801	0.127	0.177	1	HPS3	0.737539
CBWD5	0.183004	-0.143516	0.127	0.177	1	CBWD5	0.737539
RAD23A	0.183282	0.101679	0.46	0.39	1	RAD23A	0.736879
RPL7	0.183375	0.0953704	0.96	0.921	1	RPL7	0.73666
TOMM22	0.183413	0.136103	0.34	0.28	1	TOMM22	0.73657
EXOSC6	0.183508	-0.129023	0.147	0.201	1	EXOSC6	0.736345
CCDC66	0.183655	-0.161009	0.307	0.372	1	CCDC66	0.735998
MR1	0.183855	-0.0838741	0.127	0.183	1	MR1	0.735524
PPP1R14B	0.184229	-0.111799	0.6	0.665	1	PPP1R14B	0.734642
MAN1A1	0.184503	0.145341	0.107	0.067	1	MAN1A1	0.733997
PTAR1	0.185346	-0.101439	0.133	0.189	1	PTAR1	0.732017
CCDC115	0.185655	0.11516	0.227	0.165	1	CCDC115	0.731294
ATAD2	0.185729	0.0666816	0.167	0.11	1	ATAD2	0.731121
DOCK8	0.185791	0.099742	0.66	0.616	1	DOCK8	0.730975
VPS50	0.185881	-0.0850432	0.067	0.11	1	VPS50	0.730766
CLASP1	0.185921	-0.0380094	0.06	0.104	1	CLASP1	0.730673
GGA1	0.185949	-0.119258	0.233	0.287	1	GGA1	0.730606
HOXB4	0.1863	0.0639734	0.113	0.067	1	HOXB4	0.729788
SAP30BP	0.186575	0.0947562	0.2	0.14	1	SAP30BP	0.729147
SCNM1	0.186575	-0.096238	0.14	0.195	1	SCNM1	0.729147
ZNF138	0.186719	-0.0776509	0.067	0.11	1	ZNF138	0.728811
WBP1L	0.186719	-0.124898	0.067	0.11	1	WBP1L	0.728811
SLC25A53	0.186825	-0.104928	0.073	0.116	1	SLC25A53	0.728565
RPIA	0.186859	-0.0986668	0.107	0.159	1	RPIA	0.728486
MRPL17	0.187157	-0.0814709	0.1	0.152	1	MRPL17	0.727794
FNBP1	0.187397	0.15523	0.593	0.494	1	FNBP1	0.727237
FABP5	0.187478	-0.130446	0.327	0.402	1	FABP5	0.72705
FRG1	0.187701	-0.10937	0.22	0.287	1	FRG1	0.726532
AP1G2	0.187912	0.12116	0.107	0.067	1	AP1G2	0.726045
PPM1B	0.188447	0.0750143	0.187	0.128	1	PPM1B	0.72481
CDKN2A	0.188625	-0.110806	0.173	0.232	1	CDKN2A	0.7244
RPRD1A	0.188772	0.101947	0.107	0.067	1	RPRD1A	0.724063
HSPA14.1	0.189158	-0.105062	0.087	0.134	1	HSPA14.1	0.723174
ZNF814	0.189252	-0.0921501	0.067	0.11	1	ZNF814	0.722959
LAGE3	0.189274	-0.109098	0.167	0.22	1	LAGE3	0.72291
DECR1	0.189317	-0.135384	0.247	0.305	1	DECR1	0.72281
LINC00909	0.189373	-0.109955	0.093	0.14	1	LINC00909	0.722682
TNFAIP8	0.189829	0.107993	0.62	0.555	1	TNFAIP8	0.721637
ZBTB43	0.189936	0.0947166	0.127	0.079	1	ZBTB43	0.721392
C19orf12	0.189936	0.084252	0.127	0.079	1	C19orf12	0.721392
SPCS1	0.190013	0.0542674	0.727	0.652	1	SPCS1	0.721216
COMMD8	0.19002	-0.112413	0.2	0.262	1	COMMD8	0.7212
DNAJB9	0.190046	0.0990506	0.153	0.104	1	DNAJB9	0.721141
PYHIN1	0.190065	-0.0974598	0.467	0.53	1	PYHIN1	0.721097
BECN1	0.190145	0.0739445	0.173	0.116	1	BECN1	0.720916
COIL	0.190395	-0.0864712	0.107	0.159	1	COIL	0.720344
STX7	0.190499	-0.113377	0.093	0.14	1	STX7	0.720106
TAOK3	0.190575	0.133264	0.407	0.348	1	TAOK3	0.719934
KATNBL1	0.190854	0.113127	0.187	0.134	1	KATNBL1	0.7193
RPS27A	0.190911	0.0383909	0.993	1	1	RPS27A	0.719169
PPIL2	0.191108	-0.0972914	0.107	0.159	1	PPIL2	0.71872
RALGAPA2	0.191368	0.114757	0.107	0.067	1	RALGAPA2	0.71813
NPRL2	0.19176	-0.130311	0.073	0.116	1	NPRL2	0.717241
TARDBP	0.19186	-0.133614	0.133	0.189	1	TARDBP	0.717015
TAF15	0.192002	0.106138	0.387	0.293	1	TAF15	0.716693
SLC3A2	0.192079	-0.100571	0.3	0.384	1	SLC3A2	0.716519
FBXO11	0.192234	-0.0799485	0.1	0.152	1	FBXO11	0.716169
TRIP12	0.192241	0.132615	0.247	0.189	1	TRIP12	0.716154
ASXL1	0.192433	-0.11721	0.167	0.226	1	ASXL1	0.71572
ATP5IF1	0.192639	-0.146194	0.633	0.683	1	ATP5IF1	0.715256
DHRS4L2	0.193099	0.058187	0.113	0.067	1	DHRS4L2	0.71422
RAB5A	0.19326	0.115547	0.16	0.11	1	RAB5A	0.713859
CDC42SE2	0.193884	0.133686	0.687	0.677	1	CDC42SE2	0.712458
SCFD1	0.19403	0.124764	0.267	0.201	1	SCFD1	0.712132
SMC2	0.194263	-0.076402	0.073	0.116	1	SMC2	0.711609
ZC3H14	0.194263	-0.100581	0.073	0.116	1	ZC3H14	0.711609
TMEM11	0.194433	0.0398843	0.16	0.104	1	TMEM11	0.71123
TP53I11	0.194563	0.117204	0.147	0.098	1	TP53I11	0.71094
ZFAS1	0.194797	-0.105846	0.453	0.524	1	ZFAS1	0.710417
NUMB	0.194889	-0.142496	0.113	0.159	1	NUMB	0.710212
KIF21A	0.194914	-0.18026	0.18	0.232	1	KIF21A	0.710157
TRIM13	0.195029	-0.0919438	0.187	0.25	1	TRIM13	0.709901
SUB1	0.195072	0.0763696	0.913	0.866	1	SUB1	0.709804
TXN	0.195084	-0.148479	0.513	0.616	1	TXN	0.709778
CASP6	0.195103	-0.0977249	0.073	0.116	1	CASP6	0.709736
TBC1D1	0.195225	-0.103309	0.147	0.201	1	TBC1D1	0.709465
CD53	0.195328	-0.0925576	0.713	0.732	1	CD53	0.709236
GMPR2	0.195351	0.0804786	0.167	0.116	1	GMPR2	0.709185
NAA10	0.195841	0.105474	0.38	0.305	1	NAA10	0.708096
TCIRG1	0.19586	0.127342	0.233	0.177	1	TCIRG1	0.708055
ERO1B	0.196014	-0.145312	0.08	0.122	1	ERO1B	0.707712
PPP1R2	0.196622	0.0301232	0.567	0.47	1	PPP1R2	0.706369
OSGEP	0.197615	-0.0814293	0.107	0.159	1	OSGEP	0.70418
MON1B	0.198352	0.0789358	0.18	0.122	1	MON1B	0.702563
PPAN	0.198368	0.0937298	0.147	0.098	1	PPAN	0.702528
SNRNP25	0.198369	0.0900103	0.133	0.085	1	SNRNP25	0.702525
SLAMF6	0.198483	-0.119896	0.147	0.201	1	SLAMF6	0.702276
DRAM2	0.198495	-0.113829	0.127	0.177	1	DRAM2	0.702251
BRMS1	0.198603	-0.0791114	0.187	0.25	1	BRMS1	0.702013
RALA	0.198607	-0.0927866	0.32	0.384	1	RALA	0.702005
INTS13	0.198756	-0.0956052	0.067	0.11	1	INTS13	0.70168
HIVEP3	0.198767	0.126968	0.12	0.079	1	HIVEP3	0.701656
EIF3B	0.199584	-0.139766	0.213	0.268	1	EIF3B	0.699875
TMEM187	0.199637	-0.0759205	0.067	0.11	1	TMEM187	0.699759
C1orf216	0.199783	0.108887	0.113	0.073	1	C1orf216	0.69944
RGS10	0.19981	-0.154178	0.467	0.494	1	RGS10	0.699383
DNAJB6	0.199857	0.156603	0.507	0.445	1	DNAJB6	0.69928
CAMK2G	0.200211	0.0962928	0.107	0.067	1	CAMK2G	0.698511
TAF1D	0.200435	0.123666	0.48	0.427	1	TAF1D	0.698026
ATP6V1G1	0.200476	0.163691	0.707	0.665	1	ATP6V1G1	0.697938
EIF2A	0.20051	-0.0799942	0.167	0.232	1	EIF2A	0.697865
AKAP9	0.200787	-0.0504178	0.5	0.567	1	AKAP9	0.697265
ARPC3	0.201128	0.0726095	0.927	0.915	1	ARPC3	0.696527
TRAPPC1	0.201313	-0.133235	0.58	0.634	1	TRAPPC1	0.696128
KBTBD2	0.201408	-0.0783182	0.067	0.11	1	KBTBD2	0.695924
NDUFB4	0.20153	0.135461	0.507	0.433	1	NDUFB4	0.695661
TRAT1	0.201596	0.140192	0.46	0.396	1	TRAT1	0.695518
RNF34	0.201764	-0.0892632	0.167	0.232	1	RNF34	0.695157
CFAP298	0.201941	-0.116628	0.16	0.22	1	CFAP298	0.694775
TCERG1	0.202157	-0.0192401	0.113	0.171	1	TCERG1	0.694312
NIFK-AS1	0.202364	-0.141948	0.133	0.183	1	NIFK-AS1	0.693866
CCDC69	0.202393	-0.11692	0.173	0.226	1	CCDC69	0.693805
OXR1	0.202403	0.111268	0.113	0.073	1	OXR1	0.693784
CARD11	0.202654	-0.1296	0.08	0.122	1	CARD11	0.693246
COG4	0.202833	-0.126909	0.087	0.128	1	COG4	0.692862
KDM3B	0.203	0.134225	0.12	0.079	1	KDM3B	0.692504
DDX52	0.203178	-0.149433	0.14	0.189	1	DDX52	0.692124
GHITM	0.203382	0.101816	0.413	0.335	1	GHITM	0.691687
CCT7	0.203484	-0.0883999	0.34	0.409	1	CCT7	0.691469
HNRNPF	0.203648	-0.0687772	0.767	0.817	1	HNRNPF	0.69112
SECISBP2	0.20389	-0.1118	0.213	0.28	1	SECISBP2	0.690605
ABHD2	0.204085	-0.0730781	0.067	0.11	1	ABHD2	0.690189
EIF2B1	0.204104	-0.129941	0.107	0.152	1	EIF2B1	0.690149
TIA1	0.204131	-0.0841053	0.127	0.183	1	TIA1	0.69009
CSNK2B	0.204873	-0.0924164	0.3	0.39	1	CSNK2B	0.688516
NUDT4	0.204925	0.124552	0.173	0.122	1	NUDT4	0.688406
TSPAN17	0.20497	-0.100254	0.087	0.134	1	TSPAN17	0.688311
ING4	0.205233	-0.105026	0.14	0.189	1	ING4	0.687754
SFT2D1	0.205536	0.0954941	0.353	0.287	1	SFT2D1	0.687112
SEC23IP	0.205571	0.123395	0.12	0.079	1	SEC23IP	0.687038
IFITM1	0.205622	0.151883	0.153	0.11	1	IFITM1	0.68693
DESI1	0.205648	0.100597	0.173	0.122	1	DESI1	0.686875
PSMA3	0.205823	-0.10577	0.453	0.494	1	PSMA3	0.686506
LENG1	0.206034	-0.118378	0.16	0.213	1	LENG1	0.686062
TLK1	0.20645	-0.157761	0.22	0.268	1	TLK1	0.685185
APPL1	0.207299	-0.149695	0.18	0.232	1	APPL1	0.683403
STK26	0.207363	-0.133241	0.113	0.159	1	STK26	0.683269
BICRAL	0.207498	0.0912966	0.107	0.067	1	BICRAL	0.682986
SERPINB1	0.207538	0.0815631	0.52	0.427	1	SERPINB1	0.682902
LINC00667	0.207599	-0.133708	0.127	0.171	1	LINC00667	0.682774
CARD19	0.207831	0.104955	0.173	0.122	1	CARD19	0.682289
CCDC47	0.207997	0.193029	0.167	0.122	1	CCDC47	0.681943
CLSTN1	0.20843	-0.101501	0.213	0.268	1	CLSTN1	0.681041
TRIAP1	0.208562	0.127655	0.173	0.122	1	TRIAP1	0.680764
OAS2	0.20866	-0.105322	0.133	0.183	1	OAS2	0.680562
TBC1D2B	0.208847	-0.162899	0.26	0.311	1	TBC1D2B	0.680171
MRPL11	0.209127	0.10986	0.227	0.171	1	MRPL11	0.679589
PTTG1	0.20917	0.170574	0.313	0.274	1	PTTG1	0.679501
SELENOW	0.209332	-0.105312	0.433	0.53	1	SELENOW	0.679164
MAF	0.20954	-0.142922	0.22	0.287	1	MAF	0.678732
43897	0.2099	0.15054	0.293	0.244	1	43897	0.677988
STK17B	0.209944	-0.135952	0.66	0.677	1	STK17B	0.677896
C12orf45	0.210294	-0.129918	0.087	0.128	1	C12orf45	0.677173
ILF2	0.210309	-0.125818	0.28	0.348	1	ILF2	0.677143
ING5	0.210317	-0.103811	0.08	0.122	1	ING5	0.677126
MTRF1L	0.210411	0.117069	0.113	0.073	1	MTRF1L	0.676932
POLR2K	0.210897	0.159861	0.42	0.36	1	POLR2K	0.675931
NAP1L1	0.211454	-0.103668	0.473	0.518	1	NAP1L1	0.674784
MOB1A	0.211596	-0.147735	0.407	0.463	1	MOB1A	0.674493
ARF4	0.2117	0.137649	0.24	0.189	1	ARF4	0.674279
FASTK	0.211709	-0.130099	0.12	0.165	1	FASTK	0.674262
JTB	0.211821	-0.0881613	0.66	0.695	1	JTB	0.67403
MCTS1	0.21192	-0.0769742	0.14	0.195	1	MCTS1	0.673828
ZNF280D	0.212093	0.143919	0.147	0.104	1	ZNF280D	0.673473
BCL2A1	0.212093	0.132365	0.147	0.104	1	BCL2A1	0.673473
NUBP1	0.212093	-0.106451	0.1	0.146	1	NUBP1	0.673473
ZFP62	0.212093	-0.107219	0.1	0.146	1	ZFP62	0.673473
SNRNP200	0.212372	-0.208163	0.313	0.354	1	SNRNP200	0.672902
EBPL	0.212518	0.0657221	0.147	0.098	1	EBPL	0.672605
MRPL41	0.212568	-0.203446	0.453	0.506	1	MRPL41	0.672502
GIMAP8	0.212863	0.0969141	0.207	0.152	1	GIMAP8	0.671899
ATF7IP	0.212907	0.143058	0.407	0.36	1	ATF7IP	0.67181
ACAP2	0.212929	-0.115914	0.253	0.299	1	ACAP2	0.671765
RSRC1	0.213013	-0.0935379	0.2	0.268	1	RSRC1	0.671593
UTP11	0.213505	0.0919037	0.14	0.091	1	UTP11	0.670591
ACBD6	0.213556	0.0947794	0.153	0.104	1	ACBD6	0.670488
FGD5-AS1	0.213556	0.0885786	0.153	0.104	1	FGD5-AS1	0.670488
ITGB2	0.214009	0.11186	0.747	0.695	1	ITGB2	0.669569
ZNF7	0.214031	-0.117598	0.147	0.195	1	ZNF7	0.669524
STAT6	0.214348	0.0822372	0.153	0.104	1	STAT6	0.668881
STAT4	0.215067	0.0422549	0.227	0.165	1	STAT4	0.667426
C8orf59	0.215127	-0.132727	0.26	0.311	1	C8orf59	0.667304
TBRG4	0.2152	0.108027	0.12	0.079	1	TBRG4	0.667157
SRSF1	0.215458	-0.0869411	0.227	0.287	1	SRSF1	0.666636
HNRNPUL2	0.215541	-0.0967729	0.08	0.122	1	HNRNPUL2	0.666471
CD46	0.215558	0.0578521	0.367	0.287	1	CD46	0.666436
SLAMF7	0.215625	-0.147373	0.307	0.372	1	SLAMF7	0.666301
ZCCHC17	0.21565	-0.116205	0.18	0.232	1	ZCCHC17	0.666251
MRE11	0.215738	0.114444	0.127	0.085	1	MRE11	0.666073
DCAF10	0.215875	0.123723	0.113	0.073	1	DCAF10	0.665798
CD300A	0.216092	0.112671	0.12	0.079	1	CD300A	0.665362
LETMD1	0.216136	0.127591	0.14	0.098	1	LETMD1	0.665273
BRD3	0.21642	-0.14381	0.08	0.122	1	BRD3	0.664702
GPR132	0.217255	-0.121962	0.093	0.134	1	GPR132	0.663031
TBC1D5	0.217392	0.0873523	0.147	0.098	1	TBC1D5	0.662756
UBE3C	0.217719	0.101523	0.113	0.073	1	UBE3C	0.662104
MRPS31	0.217728	-0.120563	0.16	0.213	1	MRPS31	0.662085
ACAT2	0.217802	-0.131852	0.1	0.14	1	ACAT2	0.661938
IFRD1	0.217829	0.105513	0.107	0.067	1	IFRD1	0.661885
CCDC152	0.217829	0.113243	0.107	0.067	1	CCDC152	0.661885
TSPYL2	0.217829	0.105164	0.107	0.067	1	TSPYL2	0.661885
GLUD1	0.218247	0.102743	0.2	0.146	1	GLUD1	0.661051
HPRT1	0.218653	0.133284	0.173	0.128	1	HPRT1	0.660244
CIAPIN1	0.218786	0.0779047	0.107	0.067	1	CIAPIN1	0.65998
CREBRF	0.218925	0.0719217	0.24	0.177	1	CREBRF	0.659705
FARSA	0.219147	0.117969	0.133	0.091	1	FARSA	0.659264
CYLD	0.21919	-0.0695618	0.44	0.5	1	CYLD	0.65918
PPM1G	0.219243	-0.133764	0.44	0.488	1	PPM1G	0.659074
ABHD14A	0.219257	-0.113372	0.173	0.226	1	ABHD14A	0.659046
SMNDC1	0.219465	0.15061	0.187	0.134	1	SMNDC1	0.658636
TCTEX1D2	0.219746	0.0649473	0.107	0.067	1	TCTEX1D2	0.658079
AIMP2	0.219746	0.0623674	0.107	0.067	1	AIMP2	0.658079
RPL10	0.22029	0.0353011	1	1	1	RPL10	0.657004
RIPOR2	0.220298	0.135304	0.393	0.329	1	RIPOR2	0.65699
ACTR2	0.220454	-0.116911	0.54	0.61	1	ACTR2	0.656682
PI4KB	0.220506	0.0777933	0.113	0.073	1	PI4KB	0.656579
PAXIP1-AS1	0.220588	0.103326	0.12	0.079	1	PAXIP1-AS1	0.656418
CUL4A	0.220588	0.0916886	0.12	0.079	1	CUL4A	0.656418
PMEPA1	0.220766	-0.12328	0.14	0.189	1	PMEPA1	0.656068
ZEB1	0.220857	-0.0776412	0.08	0.122	1	ZEB1	0.655888
POLR2G	0.221514	-0.128085	0.227	0.287	1	POLR2G	0.6546
SRPK2	0.221641	0.0877836	0.333	0.268	1	SRPK2	0.654351
CYFIP2	0.221721	0.126238	0.32	0.274	1	CYFIP2	0.654192
GRPEL1	0.221796	-0.0683936	0.1	0.146	1	GRPEL1	0.654046
ATP9B	0.221868	0.0963054	0.127	0.085	1	ATP9B	0.653904
NCKAP1L	0.22217	-0.0985493	0.273	0.36	1	NCKAP1L	0.653314
SURF4	0.222608	0.116252	0.393	0.335	1	SURF4	0.65246
TSPAN14	0.222673	0.146456	0.38	0.317	1	TSPAN14	0.652333
GAPVD1	0.222811	0.104051	0.14	0.098	1	GAPVD1	0.652064
PLEK	0.222998	0.150456	0.32	0.262	1	PLEK	0.6517
EVI2B	0.223121	0.0838371	0.533	0.463	1	EVI2B	0.65146
CPOX	0.223643	0.0871265	0.127	0.085	1	CPOX	0.650445
MRPL12	0.223841	0.116574	0.2	0.152	1	MRPL12	0.65006
TNIK	0.223907	-0.0961525	0.12	0.165	1	TNIK	0.649932
CAPZA1	0.224099	-0.163954	0.493	0.543	1	CAPZA1	0.649561
RHEB	0.224172	0.0941818	0.353	0.287	1	RHEB	0.649419
CDC42EP3	0.224453	0.140949	0.333	0.287	1	CDC42EP3	0.648875
ZNF493	0.224558	-0.0995764	0.113	0.165	1	ZNF493	0.648671
GRWD1	0.224593	-0.100543	0.067	0.104	1	GRWD1	0.648605
ITCH	0.224686	0.140203	0.167	0.122	1	ITCH	0.648424
MIS12	0.224925	-0.111051	0.087	0.128	1	MIS12	0.647963
TMEM50A	0.224955	-0.146765	0.607	0.665	1	TMEM50A	0.647904
DDX60L	0.225324	0.0420462	0.14	0.091	1	DDX60L	0.647192
ZNF688	0.225485	0.108699	0.173	0.128	1	ZNF688	0.646883
TBL1X	0.226157	0.107904	0.113	0.073	1	TBL1X	0.64559
KRI1	0.226186	0.0662554	0.14	0.091	1	KRI1	0.645534
NDUFV3	0.226203	-0.054108	0.093	0.14	1	NDUFV3	0.645501
LINC00987	0.226552	-0.118623	0.067	0.104	1	LINC00987	0.644831
CENPX	0.226602	0.0791384	0.273	0.207	1	CENPX	0.644736
SFI1	0.226649	0.162272	0.273	0.213	1	SFI1	0.644647
RAB11FIP1	0.226932	0.12268	0.133	0.091	1	RAB11FIP1	0.644105
CCDC43	0.22758	-0.0998403	0.087	0.128	1	CCDC43	0.642866
TIMM22	0.227681	0.0724605	0.18	0.128	1	TIMM22	0.642674
HMGB1	0.227833	0.0399342	0.973	0.915	1	HMGB1	0.642383
TRBC2	0.227866	-0.0663835	0.84	0.866	1	TRBC2	0.642321
KRT10	0.227871	0.0953327	0.62	0.555	1	KRT10	0.642312
UBE2F	0.228123	0.102198	0.127	0.085	1	UBE2F	0.641832
PTPN7	0.22834	-0.112207	0.633	0.665	1	PTPN7	0.641418
OTUB1	0.228414	0.0785262	0.32	0.25	1	OTUB1	0.641278
ERN1	0.228524	0.0711113	0.107	0.067	1	ERN1	0.641068
BCL7B	0.228841	-0.139112	0.2	0.244	1	BCL7B	0.640466
TRIM26	0.229008	-0.086126	0.08	0.122	1	TRIM26	0.64015
GMEB1	0.229316	0.0536159	0.167	0.116	1	GMEB1	0.639566
ATP1B3	0.229448	0.0934355	0.36	0.293	1	ATP1B3	0.639316
PSMG4	0.230063	-0.0775413	0.093	0.14	1	PSMG4	0.638153
PBX4	0.230454	0.108198	0.133	0.091	1	PBX4	0.637415
PPA1	0.230482	0.102932	0.333	0.28	1	PPA1	0.637362
ST8SIA4	0.23094	0.136781	0.287	0.226	1	ST8SIA4	0.6365
CCDC124	0.230986	0.100759	0.167	0.122	1	CCDC124	0.636415
SEC14L1	0.231156	-0.0892825	0.087	0.128	1	SEC14L1	0.636096
PRDX2	0.231304	0.130588	0.5	0.445	1	PRDX2	0.635818
UPF2	0.231342	0.163151	0.3	0.244	1	UPF2	0.635746
ORMDL2	0.231378	0.177533	0.367	0.311	1	ORMDL2	0.635678
BABAM2	0.231505	-0.0793019	0.067	0.104	1	BABAM2	0.63544
TMEM161B-AS1	0.231505	-0.105162	0.067	0.104	1	TMEM161B-AS1	0.63544
KBTBD3	0.232056	-0.0938647	0.087	0.128	1	KBTBD3	0.634408
LINC00426	0.23223	0.0933825	0.133	0.091	1	LINC00426	0.634082
BUD31	0.232372	0.0950818	0.427	0.378	1	BUD31	0.633817
GRIPAP1	0.232405	-0.0863653	0.16	0.207	1	GRIPAP1	0.633755
BORCS8	0.232505	0.052816	0.107	0.067	1	BORCS8	0.633568
KEAP1	0.232698	-0.0897158	0.08	0.122	1	KEAP1	0.633208
PTMA	0.232712	-0.0512921	1	0.988	1	PTMA	0.633181
TMEM250	0.23274	0.140114	0.213	0.165	1	TMEM250	0.633129
PDS5A	0.232859	0.163191	0.18	0.134	1	PDS5A	0.632907
ALG8	0.232958	-0.0715857	0.087	0.128	1	ALG8	0.632722
PIGBOS1	0.23298	-0.101374	0.12	0.165	1	PIGBOS1	0.632681
NSD1	0.233187	-0.119592	0.407	0.463	1	NSD1	0.632296
RPL15	0.2332	0.0644212	1	1	1	RPL15	0.632272
DUSP23	0.233334	-0.097283	0.14	0.189	1	DUSP23	0.632022
GALK2	0.233606	-0.110095	0.093	0.134	1	GALK2	0.631516
DGCR6L	0.233707	0.097171	0.28	0.213	1	DGCR6L	0.631329
DMAP1	0.233789	-0.133775	0.1	0.14	1	DMAP1	0.631175
S100PBP	0.233846	-0.0915095	0.147	0.195	1	S100PBP	0.631069
PRDX1	0.233975	-0.109583	0.6	0.598	1	PRDX1	0.630831
DBI	0.234018	0.0886634	0.727	0.701	1	DBI	0.630751
LSM1	0.23438	0.100484	0.3	0.238	1	LSM1	0.63008
FBXO44	0.234513	-0.0908514	0.067	0.104	1	FBXO44	0.629833
GLRX5	0.234921	0.0866611	0.347	0.287	1	GLRX5	0.629079
RYR1	0.234961	0.101961	0.127	0.085	1	RYR1	0.629003
PSMD1	0.234997	-0.0896369	0.173	0.226	1	PSMD1	0.628938
RAD1	0.235342	0.06906	0.173	0.122	1	RAD1	0.628301
UBAC2	0.235348	-0.137571	0.2	0.25	1	UBAC2	0.62829
EXOSC7	0.235625	0.106632	0.153	0.11	1	EXOSC7	0.627778
COA6	0.235711	-0.126649	0.247	0.293	1	COA6	0.62762
HAUS6	0.235803	-0.0917113	0.073	0.11	1	HAUS6	0.62745
RAD21	0.235914	0.130769	0.447	0.378	1	RAD21	0.627246
YWHAH	0.236169	0.110828	0.36	0.299	1	YWHAH	0.626778
RPUSD1	0.236376	0.0794365	0.12	0.079	1	RPUSD1	0.626397
LMBRD1	0.236491	0.12143	0.16	0.116	1	LMBRD1	0.626186
MCM5	0.236534	-0.143916	0.067	0.104	1	MCM5	0.626106
SMAD3	0.236601	0.0962804	0.14	0.098	1	SMAD3	0.625984
PARP9	0.237028	0.0733374	0.26	0.195	1	PARP9	0.625201
OS9	0.237125	0.0898222	0.193	0.14	1	OS9	0.625023
LUC7L	0.23737	-0.0810686	0.08	0.122	1	LUC7L	0.624575
ZFR	0.237958	0.121552	0.313	0.25	1	ZFR	0.6235
NDUFS2	0.238039	0.125856	0.373	0.323	1	NDUFS2	0.623352
ST13	0.23807	-0.0782985	0.367	0.421	1	ST13	0.623295
KIN	0.238224	0.116079	0.253	0.195	1	KIN	0.623014
TBC1D10B	0.238284	0.0629778	0.12	0.079	1	TBC1D10B	0.622904
PRPF38B	0.23895	-0.111579	0.607	0.671	1	PRPF38B	0.621693
FTH1	0.239062	-0.0588378	0.933	0.951	1	FTH1	0.621489
POLR2L	0.239426	0.125141	0.52	0.488	1	POLR2L	0.620828
RPS8	0.239603	0.0523644	0.993	0.994	1	RPS8	0.620508
PITPNC1	0.23984	0.0315311	0.407	0.329	1	PITPNC1	0.620079
CYB5B	0.24027	0.115787	0.253	0.195	1	CYB5B	0.619301
TBC1D22A	0.240402	0.0982348	0.147	0.104	1	TBC1D22A	0.619061
VAV1	0.240638	0.107835	0.16	0.116	1	VAV1	0.618635
RBMX	0.24076	-0.067055	0.327	0.384	1	RBMX	0.618415
TBC1D10C	0.240927	-0.0685849	0.647	0.713	1	TBC1D10C	0.618114
AKNA	0.240987	0.0700988	0.593	0.518	1	AKNA	0.618007
OLA1	0.241192	0.114908	0.193	0.146	1	OLA1	0.617637
CCDC88C	0.241615	-0.135186	0.313	0.36	1	CCDC88C	0.616876
LUC7L2	0.241767	0.108878	0.18	0.128	1	LUC7L2	0.616603
KIF20B	0.241927	-0.0979243	0.16	0.201	1	KIF20B	0.616315
DDOST	0.242954	-0.139079	0.273	0.323	1	DDOST	0.614477
CALCOCO1	0.243022	-0.0835695	0.1	0.146	1	CALCOCO1	0.614354
BRIX1	0.243134	0.105542	0.167	0.122	1	BRIX1	0.614154
FTL	0.243328	-0.154473	0.947	0.957	1	FTL	0.613808
ATP5F1A	0.243333	-0.140499	0.407	0.47	1	ATP5F1A	0.613799
ARFGEF1	0.243497	0.120254	0.193	0.146	1	ARFGEF1	0.613507
FRYL	0.243566	0.107334	0.233	0.183	1	FRYL	0.613384
TAF10	0.243625	-0.134504	0.36	0.409	1	TAF10	0.613279
BANF1	0.244299	0.116668	0.427	0.366	1	BANF1	0.612079
BCLAF1	0.244528	-0.0893069	0.3	0.354	1	BCLAF1	0.611671
MRPL46	0.244556	-0.0548077	0.107	0.152	1	MRPL46	0.611622
RPL26L1	0.244731	-0.11148	0.073	0.11	1	RPL26L1	0.611311
CDK6	0.245683	0.104851	0.227	0.177	1	CDK6	0.609624
CNOT7	0.245687	-0.143907	0.207	0.256	1	CNOT7	0.609618
TMEM60	0.245737	-0.110989	0.073	0.11	1	TMEM60	0.609529
IFITM2	0.245823	0.106345	0.58	0.5	1	IFITM2	0.609378
ARHGEF1	0.245979	-0.0835725	0.533	0.622	1	ARHGEF1	0.609102
SSR2	0.246055	-0.0539986	0.693	0.774	1	SSR2	0.608968
ATMIN	0.24668	0.0891475	0.127	0.085	1	ATMIN	0.607866
ELOC	0.246694	0.105794	0.333	0.268	1	ELOC	0.607842
COPS5	0.247057	0.0745054	0.267	0.201	1	COPS5	0.607203
TMEM43	0.247419	-0.122953	0.133	0.183	1	TMEM43	0.606566
PITPNM1	0.247759	0.052408	0.113	0.073	1	PITPNM1	0.605971
DIMT1	0.247902	0.113414	0.107	0.073	1	DIMT1	0.60572
NBL1	0.248038	-0.10861	0.093	0.134	1	NBL1	0.605482
ZNRF2	0.248168	0.109117	0.227	0.171	1	ZNRF2	0.605255
PSMC3	0.248433	-0.101501	0.2	0.262	1	PSMC3	0.604791
CCDC59	0.248515	-0.150556	0.247	0.293	1	CCDC59	0.604647
MT-ND5	0.248907	-0.078269	0.947	0.963	1	MT-ND5	0.603963
NNT	0.24896	-0.108372	0.093	0.134	1	NNT	0.60387
SNRNP35	0.249436	-0.113486	0.24	0.287	1	SNRNP35	0.603041
SELENOT	0.24949	0.0738313	0.493	0.402	1	SELENOT	0.602947
RBM48	0.249585	0.112642	0.133	0.091	1	RBM48	0.602782
PRPF18	0.249585	0.0685731	0.133	0.091	1	PRPF18	0.602782
CUL3	0.249841	-0.126526	0.273	0.323	1	CUL3	0.602337
SHMT2	0.24997	-0.0853166	0.067	0.104	1	SHMT2	0.602113
HPF1	0.250006	0.0646411	0.227	0.171	1	HPF1	0.60205
MAEA	0.250053	0.087402	0.133	0.091	1	MAEA	0.601968
KPNB1	0.250208	0.0699375	0.4	0.317	1	KPNB1	0.601699
NPTN	0.250515	-0.137026	0.087	0.122	1	NPTN	0.601166
PRKAG2	0.250581	-0.115313	0.087	0.128	1	PRKAG2	0.601051
RPS5	0.25072	-0.0373107	0.993	1	1	RPS5	0.600811
COPB1	0.250729	-0.115643	0.293	0.348	1	COPB1	0.600796
ATP13A3	0.250813	-0.072277	0.073	0.11	1	ATP13A3	0.60065
CMTM7	0.251026	-0.105893	0.233	0.287	1	CMTM7	0.600281
HNRNPLL	0.251402	-0.0974937	0.167	0.22	1	HNRNPLL	0.599631
NFATC3	0.251454	0.0485835	0.3	0.238	1	NFATC3	0.599542
MFSD6	0.251837	-0.103306	0.073	0.11	1	MFSD6	0.598881
STAT5B	0.251839	-0.0827388	0.133	0.183	1	STAT5B	0.598877
RIT1	0.252489	-0.0807697	0.087	0.128	1	RIT1	0.597757
CHD9	0.252531	-0.0752194	0.2	0.25	1	CHD9	0.597685
LAT	0.252638	0.105546	0.58	0.537	1	LAT	0.597502
RNF213	0.252787	0.0646208	0.92	0.878	1	RNF213	0.597246
FERMT3	0.253323	-0.175608	0.373	0.427	1	FERMT3	0.596326
SOAT1	0.253946	-0.0959511	0.08	0.116	1	SOAT1	0.595259
CCDC174	0.25414	-0.106727	0.147	0.195	1	CCDC174	0.594927
VSIR	0.254308	-0.0797917	0.16	0.207	1	VSIR	0.59464
SEC11A	0.254484	-0.0937642	0.493	0.524	1	SEC11A	0.594339
PTCD3	0.254506	0.09063	0.24	0.189	1	PTCD3	0.594302
KTN1	0.254599	0.119424	0.547	0.488	1	KTN1	0.594143
RTCA	0.254691	0.0905568	0.213	0.159	1	RTCA	0.593986
FEZ2	0.254773	0.0760941	0.133	0.091	1	FEZ2	0.593846
ELMO1	0.255149	-0.102387	0.1	0.14	1	ELMO1	0.593206
COPS2	0.255459	-0.114762	0.16	0.207	1	COPS2	0.592679
SLU7	0.25607	-0.139413	0.2	0.25	1	SLU7	0.591641
DHX30	0.256081	0.103122	0.207	0.152	1	DHX30	0.591623
SLC7A6OS	0.256125	0.0959311	0.2	0.152	1	SLC7A6OS	0.591549
TMA16	0.256201	0.0820898	0.133	0.091	1	TMA16	0.591418
CCDC91	0.256228	-0.0871324	0.16	0.207	1	CCDC91	0.591373
TRIOBP	0.256424	-0.0949194	0.093	0.134	1	TRIOBP	0.591041
TNFSF10	0.256773	-0.0476711	0.313	0.372	1	TNFSF10	0.59045
ANAPC11	0.256942	0.0554263	0.413	0.341	1	ANAPC11	0.590164
CRYZL1	0.257303	-0.0648666	0.113	0.159	1	CRYZL1	0.589554
MAD2L1BP	0.257463	0.0677626	0.14	0.098	1	MAD2L1BP	0.589285
RANBP1	0.257551	-0.118004	0.34	0.384	1	RANBP1	0.589136
EPM2AIP1	0.257702	-0.129542	0.167	0.213	1	EPM2AIP1	0.588882
WSB2	0.258071	-0.135337	0.133	0.177	1	WSB2	0.58826
PSMB5	0.258183	0.0963053	0.187	0.14	1	PSMB5	0.588072
RPL8	0.258503	0.0560138	0.987	0.994	1	RPL8	0.587534
NDUFV1	0.258618	0.121294	0.16	0.116	1	NDUFV1	0.587341
GABPB2	0.258618	-0.0772817	0.113	0.159	1	GABPB2	0.587341
CISD3	0.258793	0.100748	0.247	0.195	1	CISD3	0.587048
CACUL1	0.258837	-0.108701	0.1	0.14	1	CACUL1	0.586974
TKT	0.259223	-0.106949	0.213	0.274	1	TKT	0.586327
GMFB	0.259578	-0.0991684	0.067	0.104	1	GMFB	0.585732
BCL11B	0.259748	-0.107555	0.407	0.457	1	BCL11B	0.585447
DNAJC8	0.259968	0.0577467	0.613	0.53	1	DNAJC8	0.58508
ASPSCR1	0.26	0.0752444	0.12	0.079	1	ASPSCR1	0.585027
CTBP1	0.260276	0.0772276	0.14	0.098	1	CTBP1	0.584566
CFLAR	0.260384	0.088559	0.64	0.585	1	CFLAR	0.584386
NPLOC4	0.260661	-0.0579582	0.067	0.104	1	NPLOC4	0.583923
AP2A2	0.260661	-0.0647022	0.067	0.104	1	AP2A2	0.583923
FAM122A	0.260661	-0.08418	0.067	0.104	1	FAM122A	0.583923
WDR3	0.260661	-0.0918131	0.067	0.104	1	WDR3	0.583923
CCNK	0.261314	-0.0973747	0.107	0.152	1	CCNK	0.582838
SS18L2	0.261612	-0.0840169	0.473	0.512	1	SS18L2	0.582343
KLF2	0.262162	0.19516	0.253	0.207	1	KLF2	0.58143
IPO5	0.262235	-0.0762395	0.073	0.11	1	IPO5	0.581309
OST4	0.262639	0.0849666	0.88	0.848	1	OST4	0.58064
DEGS1	0.262769	0.0884764	0.267	0.207	1	DEGS1	0.580426
SNRPC	0.262986	0.136175	0.367	0.323	1	SNRPC	0.580067
FCMR	0.263025	0.085913	0.233	0.177	1	FCMR	0.580003
WDR55	0.263064	-0.112359	0.08	0.116	1	WDR55	0.579939
ZCCHC9	0.26308	0.0868425	0.18	0.134	1	ZCCHC9	0.579911
FOXO3	0.263291	-0.0914549	0.073	0.11	1	FOXO3	0.579563
PLCG2	0.263498	-0.0911428	0.1	0.14	1	PLCG2	0.579222
NBAS	0.263743	0.115035	0.12	0.085	1	NBAS	0.57882
KIF22	0.264091	-0.0972626	0.08	0.116	1	KIF22	0.578247
KMT5B	0.264158	0.123886	0.227	0.183	1	KMT5B	0.578137
DDX19A	0.26435	-0.082042	0.073	0.11	1	DDX19A	0.57782
HMCES	0.264469	-0.137227	0.113	0.152	1	HMCES	0.577626
TESC	0.264813	0.0938402	0.16	0.116	1	TESC	0.577061
LEMD3	0.265312	0.117359	0.107	0.073	1	LEMD3	0.576244
KCTD5	0.265312	0.114648	0.107	0.073	1	KCTD5	0.576244
NDUFB1	0.265558	0.0834672	0.367	0.299	1	NDUFB1	0.57584
PTPN18	0.265569	0.075111	0.207	0.152	1	PTPN18	0.575823
IKBKG	0.265774	0.114343	0.12	0.085	1	IKBKG	0.575488
CEP95	0.265972	-0.0747741	0.093	0.134	1	CEP95	0.575165
PHACTR2	0.266502	-0.0814753	0.26	0.323	1	PHACTR2	0.574299
SEMA4D	0.266521	0.106915	0.433	0.354	1	SEMA4D	0.574269
ATAD2B	0.266572	-0.0415692	0.1	0.146	1	ATAD2B	0.574186
PPP4R3A	0.266577	-0.0972149	0.227	0.28	1	PPP4R3A	0.574177
GEMIN7	0.266921	0.0789605	0.14	0.098	1	GEMIN7	0.573617
VEZT	0.267121	-0.0481352	0.087	0.128	1	VEZT	0.573292
SELENOM	0.2673	-0.0896836	0.173	0.226	1	SELENOM	0.573001
EXOC7	0.267447	0.107457	0.273	0.226	1	EXOC7	0.572762
ACTA2	0.267478	0.0964794	0.107	0.073	1	ACTA2	0.572712
IGKC	0.267488	-0.1689	0.447	0.482	1	IGKC	0.572696
CCPG1	0.267503	-0.163066	0.253	0.293	1	CCPG1	0.572671
JAK1	0.267769	0.0802154	0.733	0.695	1	JAK1	0.572241
PPHLN1	0.268199	-0.0731788	0.313	0.384	1	PPHLN1	0.571543
TTC9C	0.268218	-0.0844136	0.1	0.14	1	TTC9C	0.571513
DIS3L2	0.268331	-0.0464021	0.067	0.104	1	DIS3L2	0.571329
ORMDL1	0.268707	0.085767	0.64	0.591	1	ORMDL1	0.570722
MALSU1	0.268925	0.0952233	0.2	0.152	1	MALSU1	0.570369
AKT3	0.269689	-0.0841626	0.073	0.11	1	AKT3	0.569137
MFAP1	0.27007	-0.0460012	0.24	0.293	1	MFAP1	0.568523
ATG2A	0.270121	-0.0920862	0.1	0.14	1	ATG2A	0.568441
ADSS	0.270155	0.192873	0.253	0.207	1	ADSS	0.568387
ERCC6	0.27075	0.133203	0.107	0.073	1	ERCC6	0.567432
DHRS4-AS1	0.27075	0.116509	0.107	0.073	1	DHRS4-AS1	0.567432
TMEM208	0.27093	0.0663545	0.327	0.268	1	TMEM208	0.567143
LCP1	0.270982	-0.0788763	0.793	0.823	1	LCP1	0.56706
GSTP1	0.270984	0.0666839	0.687	0.579	1	GSTP1	0.567057
S1PR4	0.271108	0.0804929	0.5	0.427	1	S1PR4	0.566857
GPI	0.271341	-0.0582587	0.133	0.183	1	GPI	0.566485
NOC2L	0.272027	-0.0733547	0.153	0.201	1	NOC2L	0.565388
KLHDC4	0.272477	0.116362	0.213	0.171	1	KLHDC4	0.56467
POP5	0.272592	-0.114786	0.233	0.287	1	POP5	0.564487
NDUFB2	0.272796	0.105057	0.607	0.598	1	NDUFB2	0.564162
TRIM22	0.27282	0.137875	0.367	0.323	1	TRIM22	0.564124
SETD5	0.272936	-0.0931253	0.187	0.232	1	SETD5	0.563939
RAB4A	0.273207	-0.0843105	0.12	0.165	1	RAB4A	0.563508
HSP90B1	0.273314	-0.132646	0.533	0.567	1	HSP90B1	0.563338
GPAA1	0.273374	-0.0958517	0.087	0.122	1	GPAA1	0.563243
RIOK2	0.273457	0.0600524	0.12	0.079	1	RIOK2	0.563111
IDH3G	0.273509	0.0512871	0.28	0.22	1	IDH3G	0.563028
ARIH2	0.273963	0.121434	0.207	0.165	1	ARIH2	0.562308
PCNX1	0.2742	0.105702	0.24	0.189	1	PCNX1	0.561933
MRPS5	0.274596	-0.0819641	0.253	0.311	1	MRPS5	0.561306
PTPN6	0.274665	0.169874	0.333	0.287	1	PTPN6	0.561197
WDR1	0.274872	0.0755645	0.367	0.311	1	WDR1	0.560869
FAM208A	0.274963	0.0834555	0.247	0.183	1	FAM208A	0.560726
YWHAG	0.275046	0.0992655	0.12	0.085	1	YWHAG	0.560595
HMGN2	0.275367	0.123045	0.513	0.47	1	HMGN2	0.560087
ZNF26	0.275427	-0.12814	0.087	0.122	1	ZNF26	0.559994
GAPDH	0.27566	-0.0675958	0.973	0.982	1	GAPDH	0.559626
MANF	0.275716	0.063973	0.413	0.36	1	MANF	0.559539
MTX2	0.275774	-0.134896	0.093	0.128	1	MTX2	0.559447
ALG13	0.275898	-0.0721774	0.12	0.165	1	ALG13	0.559251
SET	0.276015	-0.117757	0.713	0.732	1	SET	0.559068
DNAJC2	0.276247	0.111743	0.233	0.183	1	DNAJC2	0.558703
PARVG	0.276264	0.10451	0.3	0.244	1	PARVG	0.558675
RIC8A	0.276341	0.119218	0.167	0.128	1	RIC8A	0.558555
PARP12	0.276753	0.111201	0.133	0.098	1	PARP12	0.557908
THOC7	0.276789	0.100093	0.347	0.293	1	THOC7	0.557851
ATF2	0.276992	0.103268	0.147	0.104	1	ATF2	0.557532
RABL6	0.277074	-0.0957942	0.207	0.256	1	RABL6	0.557404
RPL9	0.277586	0.0149897	0.987	1	1	RPL9	0.556603
THAP1	0.277589	-0.0728182	0.127	0.171	1	THAP1	0.556598
CAPZB	0.278031	-0.139127	0.68	0.683	1	CAPZB	0.555907
BSG	0.278057	-0.0808429	0.34	0.396	1	BSG	0.555866
RPS7	0.278689	0.0358455	1	1	1	RPS7	0.554881
YPEL3	0.278797	-0.125825	0.513	0.53	1	YPEL3	0.554713
MAT2B	0.279217	-0.092727	0.167	0.22	1	MAT2B	0.554058
AZIN1	0.279367	0.0784144	0.173	0.128	1	AZIN1	0.553824
CASD1	0.279483	0.028025	0.113	0.073	1	CASD1	0.553645
GTF2E2	0.279515	-0.0781396	0.12	0.165	1	GTF2E2	0.553596
APOL3	0.279696	0.101283	0.267	0.213	1	APOL3	0.553313
SBDS	0.279737	0.0671681	0.287	0.226	1	SBDS	0.55325
HSPB1	0.279779	0.151374	0.14	0.104	1	HSPB1	0.553184
CCZ1	0.279957	-0.0573457	0.187	0.238	1	CCZ1	0.552908
GLT8D1	0.279972	0.0980024	0.207	0.159	1	GLT8D1	0.552886
HSPA1A	0.280003	-0.119475	0.3	0.341	1	HSPA1A	0.552837
ZNF148	0.280044	0.0869218	0.333	0.287	1	ZNF148	0.552773
CIRBP	0.28057	-0.0345188	0.567	0.61	1	CIRBP	0.551959
CLOCK	0.280605	-0.092453	0.087	0.122	1	CLOCK	0.551904
SF3B1	0.280727	-0.0669972	0.567	0.591	1	SF3B1	0.551716
TCOF1	0.280785	-0.0991388	0.147	0.189	1	TCOF1	0.551626
LBH	0.281009	0.0849773	0.5	0.451	1	LBH	0.55128
BRAF	0.281154	-0.0975421	0.127	0.171	1	BRAF	0.551056
SDR39U1	0.281854	0.0950992	0.107	0.073	1	SDR39U1	0.549976
BCCIP	0.283073	-0.0448776	0.113	0.159	1	BCCIP	0.548101
PBDC1	0.283329	0.164344	0.273	0.226	1	PBDC1	0.547708
RAP2A	0.283471	0.106842	0.12	0.085	1	RAP2A	0.547491
COMMD6	0.283528	-0.0947995	0.72	0.744	1	COMMD6	0.547405
LSP1	0.283628	-0.108785	0.68	0.689	1	LSP1	0.547251
MRPL4	0.283711	0.103727	0.253	0.201	1	MRPL4	0.547123
LARP4B	0.283744	0.0623439	0.127	0.085	1	LARP4B	0.547073
C12orf76	0.283767	0.072071	0.147	0.104	1	C12orf76	0.547039
MCRIP1	0.283863	-0.0680964	0.253	0.305	1	MCRIP1	0.546892
CCL4L2	0.283913	-0.198118	0.073	0.11	1	CCL4L2	0.546815
TMEM120B	0.284007	-0.112236	0.213	0.256	1	TMEM120B	0.546671
MRPS36	0.284083	-0.110286	0.26	0.311	1	MRPS36	0.546555
SF3A2	0.284202	-0.131228	0.147	0.189	1	SF3A2	0.546373
UBN1	0.284298	-0.111949	0.24	0.287	1	UBN1	0.546227
ZBTB7A	0.284389	-0.133822	0.393	0.457	1	ZBTB7A	0.546087
ACAA1	0.284454	0.107719	0.22	0.171	1	ACAA1	0.545988
PAG1	0.284569	-0.110158	0.36	0.409	1	PAG1	0.545812
DNAJC21	0.284627	-0.103344	0.287	0.341	1	DNAJC21	0.545724
CHPT1	0.284695	-0.0646773	0.1	0.14	1	CHPT1	0.54562
ENOSF1	0.284778	-0.0475314	0.093	0.134	1	ENOSF1	0.545493
USP48	0.2852	-0.104442	0.227	0.274	1	USP48	0.544851
RIF1	0.285515	0.0726018	0.367	0.299	1	RIF1	0.544372
SREK1	0.285662	-0.0518576	0.207	0.268	1	SREK1	0.544148
ARHGDIB	0.286021	0.0721231	0.94	0.878	1	ARHGDIB	0.543601
KDM2A	0.286606	0.0757015	0.273	0.22	1	KDM2A	0.542715
SLC25A3	0.286689	-0.0689818	0.64	0.646	1	SLC25A3	0.542589
CERK	0.286843	-0.0567975	0.12	0.165	1	CERK	0.542355
GNPDA1	0.286998	0.121499	0.127	0.091	1	GNPDA1	0.54212
HENMT1	0.287167	-0.083773	0.113	0.152	1	HENMT1	0.541865
TSEN15	0.287195	-0.13002	0.127	0.165	1	TSEN15	0.541824
KAT6A	0.287249	-0.0853388	0.253	0.317	1	KAT6A	0.541741
COX6A1	0.287325	0.057158	0.78	0.683	1	COX6A1	0.541627
PABPC4	0.2874	-0.0999729	0.14	0.183	1	PABPC4	0.541513
BCAP29	0.287456	-0.105622	0.16	0.201	1	BCAP29	0.541428
ZNF330	0.287604	-0.0731595	0.107	0.146	1	ZNF330	0.541205
RBL2	0.287835	0.0454802	0.507	0.439	1	RBL2	0.540857
CLPTM1	0.287966	0.0475523	0.127	0.085	1	CLPTM1	0.540659
RELA	0.288084	0.079671	0.2	0.152	1	RELA	0.540481
CSK	0.288266	-0.113	0.493	0.537	1	CSK	0.540207
SEC61G	0.288299	0.0698017	0.58	0.512	1	SEC61G	0.540157
AFG3L2	0.288568	0.0902612	0.127	0.091	1	AFG3L2	0.539752
MTCH1	0.288729	-0.112775	0.247	0.293	1	MTCH1	0.53951
EIF4EBP2	0.289077	-0.103806	0.113	0.152	1	EIF4EBP2	0.538987
IDS	0.289336	-0.0680938	0.467	0.506	1	IDS	0.538598
BAG6	0.289556	-0.0886224	0.107	0.146	1	BAG6	0.538267
ATOX1	0.289683	-0.0894516	0.12	0.159	1	ATOX1	0.538077
MCMBP	0.289808	0.091076	0.107	0.073	1	MCMBP	0.53789
FKBP2	0.289946	0.123089	0.487	0.433	1	FKBP2	0.537683
KCMF1	0.290248	-0.110443	0.147	0.189	1	KCMF1	0.53723
ARHGAP4	0.290446	-0.0604104	0.207	0.262	1	ARHGAP4	0.536935
NUPL2	0.290478	-0.0928064	0.133	0.177	1	NUPL2	0.536887
ERGIC3	0.290649	-0.0799843	0.153	0.195	1	ERGIC3	0.536631
VPS41	0.29067	0.096932	0.127	0.091	1	VPS41	0.536601
POLG2	0.290957	0.0804018	0.107	0.073	1	POLG2	0.536172
UPF1	0.290959	0.108589	0.18	0.14	1	UPF1	0.536168
AP2S1	0.290996	0.0707891	0.493	0.421	1	AP2S1	0.536113
HAUS1	0.291026	-0.097942	0.107	0.146	1	HAUS1	0.536068
LSM3	0.291079	-0.0833529	0.327	0.402	1	LSM3	0.53599
CAPRIN1	0.291244	-0.0602093	0.18	0.232	1	CAPRIN1	0.535743
GALNT11	0.291541	-0.126108	0.2	0.244	1	GALNT11	0.5353
SH3GLB1	0.291837	-0.0998401	0.44	0.488	1	SH3GLB1	0.53486
SYAP1	0.291956	0.0869929	0.167	0.122	1	SYAP1	0.534682
DYNLT3	0.292097	0.124284	0.207	0.165	1	DYNLT3	0.534473
EMP3	0.292136	-0.0965757	0.827	0.811	1	EMP3	0.534415
RNF170	0.292149	0.0289669	0.133	0.091	1	RNF170	0.534396
SMDT1	0.292304	-0.0769117	0.46	0.53	1	SMDT1	0.534166
MTERF4	0.292538	-0.121897	0.36	0.384	1	MTERF4	0.533818
FAM53B	0.293054	-0.0571136	0.167	0.22	1	FAM53B	0.533053
EIF6	0.293106	-0.101132	0.28	0.335	1	EIF6	0.532976
AGFG2	0.293157	0.0907738	0.12	0.085	1	AGFG2	0.5329
UFSP2	0.293302	0.0450206	0.127	0.085	1	UFSP2	0.532685
TMEM222	0.293302	-0.0782655	0.087	0.122	1	TMEM222	0.532685
ZFP36	0.293345	0.0858974	0.327	0.268	1	ZFP36	0.532621
PIK3CG	0.29369	0.111324	0.14	0.104	1	PIK3CG	0.532111
ZBTB25	0.293706	-0.113177	0.187	0.232	1	ZBTB25	0.532088
BTN3A2	0.293771	-0.127592	0.473	0.512	1	BTN3A2	0.531991
TAP1	0.293882	0.0882672	0.68	0.591	1	TAP1	0.531827
WHAMM	0.293994	0.130618	0.133	0.098	1	WHAMM	0.531662
NUDC	0.294013	0.0809794	0.42	0.372	1	NUDC	0.531634
UBXN7	0.294247	0.104798	0.12	0.085	1	UBXN7	0.531288
ZDHHC6	0.294856	-0.0624922	0.113	0.152	1	ZDHHC6	0.53039
RALGDS	0.294912	-0.122467	0.187	0.232	1	RALGDS	0.530307
COASY	0.295076	-0.0897515	0.08	0.116	1	COASY	0.530067
UBE2V2	0.295101	-0.0993677	0.24	0.293	1	UBE2V2	0.53003
DBF4	0.295715	0.134299	0.14	0.104	1	DBF4	0.529127
TMEM181	0.295827	0.116783	0.153	0.116	1	TMEM181	0.528963
TMEM156	0.296186	-0.0693243	0.08	0.116	1	TMEM156	0.528436
INPP5D	0.296299	0.196883	0.293	0.262	1	INPP5D	0.528269
MT-ATP8	0.296352	0.0645107	0.16	0.116	1	MT-ATP8	0.528192
BLCAP	0.296536	-0.125439	0.087	0.122	1	BLCAP	0.527923
NADSYN1	0.296588	0.088547	0.133	0.098	1	NADSYN1	0.527846
MRPS12	0.297125	0.0738642	0.433	0.372	1	MRPS12	0.527061
SOCS1	0.297251	0.159261	0.313	0.262	1	SOCS1	0.526877
NF1	0.297264	-0.105208	0.147	0.189	1	NF1	0.526858
S100A11	0.297418	0.0987156	0.713	0.665	1	S100A11	0.526632
ATP2A2	0.297486	-0.0411496	0.073	0.11	1	ATP2A2	0.526533
EXOC2	0.297619	-0.0730619	0.087	0.122	1	EXOC2	0.52634
KIAA2013	0.297774	-0.079514	0.113	0.152	1	KIAA2013	0.526113
MKNK1	0.297912	0.0714597	0.107	0.073	1	MKNK1	0.525912
FAM219B	0.297952	-0.0722486	0.107	0.146	1	FAM219B	0.525854
LUZP1	0.298124	0.0838225	0.24	0.189	1	LUZP1	0.525602
ATP5PO	0.29848	0.0657468	0.513	0.439	1	ATP5PO	0.525085
EIF5B	0.299001	-0.10148	0.367	0.427	1	EIF5B	0.524328
HTATIP2	0.299167	0.124235	0.24	0.201	1	HTATIP2	0.524087
RGP1	0.29974	0.0759347	0.113	0.079	1	RGP1	0.523256
EMSY	0.299792	0.0959733	0.14	0.104	1	EMSY	0.52318
MT-ND2	0.29992	-0.0638141	1	0.982	1	MT-ND2	0.522994
WDR61	0.299951	-0.0753056	0.107	0.146	1	WDR61	0.52295
C1orf43	0.300104	-0.0784665	0.227	0.28	1	C1orf43	0.522728
THAP5	0.300186	-0.0856306	0.153	0.195	1	THAP5	0.522609
CALR	0.300812	-0.0811908	0.68	0.707	1	CALR	0.521705
SEC61B	0.300848	-0.0519752	0.72	0.768	1	SEC61B	0.521653
ARF5	0.301254	-0.0982531	0.267	0.311	1	ARF5	0.521067
DDX10	0.301298	0.0912699	0.133	0.098	1	DDX10	0.521004
DNAJB14	0.301748	-0.101156	0.313	0.372	1	DNAJB14	0.520355
INPP4A	0.303289	-0.0835491	0.153	0.201	1	INPP4A	0.518143
EI24	0.303407	-0.0586603	0.093	0.134	1	EI24	0.517975
PPP1R35	0.303446	0.0958776	0.38	0.323	1	PPP1R35	0.517919
ABI1	0.303451	0.0830682	0.233	0.189	1	ABI1	0.517912
SLC30A7	0.303495	-0.103688	0.147	0.189	1	SLC30A7	0.517849
ZFAND2B	0.303989	-0.0538075	0.193	0.244	1	ZFAND2B	0.517142
YTHDF2	0.304302	0.092138	0.307	0.244	1	YTHDF2	0.516696
UQCR11	0.304382	0.0792046	0.68	0.677	1	UQCR11	0.516581
BCL7C	0.304536	-0.0861386	0.253	0.317	1	BCL7C	0.516361
MPC1	0.304797	-0.0710701	0.193	0.244	1	MPC1	0.515989
IWS1	0.304855	-0.0802821	0.213	0.262	1	IWS1	0.515907
MTX1	0.304941	0.0959623	0.14	0.104	1	MTX1	0.515785
CCNT2	0.304961	0.112761	0.167	0.128	1	CCNT2	0.515755
DHPS	0.305101	-0.106869	0.18	0.226	1	DHPS	0.515556
PRELID3B	0.305651	-0.0757578	0.113	0.152	1	PRELID3B	0.514774
FMR1	0.305947	-0.0640903	0.12	0.159	1	FMR1	0.514354
SCAF8	0.305977	0.0869153	0.14	0.104	1	SCAF8	0.514311
CHD3	0.307066	-0.0733669	0.247	0.311	1	CHD3	0.512768
MPC2	0.307301	0.073329	0.347	0.287	1	MPC2	0.512435
POLR2J3.1	0.307648	0.122046	0.54	0.53	1	POLR2J3.1	0.511946
PPP2R2D	0.307797	0.0984948	0.213	0.165	1	PPP2R2D	0.511735
SPG11	0.307901	-0.0837402	0.173	0.22	1	SPG11	0.511588
CDK5RAP3	0.307926	-0.0823503	0.127	0.171	1	CDK5RAP3	0.511554
RPS28	0.308116	0.0750859	0.993	0.976	1	RPS28	0.511286
LONP1	0.308552	0.0847643	0.107	0.073	1	LONP1	0.510672
TPI1	0.308853	0.0917022	0.527	0.488	1	TPI1	0.510249
TAOK1	0.309448	0.0958734	0.193	0.152	1	TAOK1	0.509412
COPS3	0.309645	0.0902021	0.18	0.14	1	COPS3	0.509136
SNRPD1	0.309676	-0.0528317	0.347	0.427	1	SNRPD1	0.509092
PPIL3	0.309726	-0.0722334	0.08	0.116	1	PPIL3	0.509022
PPIF	0.30986	-0.0837809	0.12	0.159	1	PPIF	0.508835
RCC1L	0.310873	-0.0479765	0.08	0.116	1	RCC1L	0.507417
VPS8	0.310873	-0.0623176	0.08	0.116	1	VPS8	0.507417
FGFBP2	0.310873	-0.0763373	0.08	0.116	1	FGFBP2	0.507417
LIX1L	0.311021	0.101865	0.207	0.165	1	LIX1L	0.507211
ERH	0.311497	0.100338	0.513	0.463	1	ERH	0.506546
GPSM3	0.311546	0.0752617	0.673	0.64	1	GPSM3	0.506478
WWC3	0.311551	-0.120759	0.073	0.104	1	WWC3	0.50647
FAM49B	0.311792	-0.100398	0.593	0.659	1	FAM49B	0.506135
BIRC2	0.311912	0.0891295	0.213	0.171	1	BIRC2	0.505968
NDUFS6	0.311947	0.0513044	0.587	0.53	1	NDUFS6	0.505918
GNL1	0.311978	-0.108683	0.107	0.14	1	GNL1	0.505876
PIEZO1	0.312052	0.0827754	0.12	0.085	1	PIEZO1	0.505773
PSMC2	0.312207	0.0822144	0.253	0.207	1	PSMC2	0.505557
NARF	0.31224	-0.104361	0.227	0.268	1	NARF	0.505511
RBM17	0.31261	-0.10272	0.24	0.287	1	RBM17	0.504997
PAN3	0.312655	-0.0791107	0.113	0.152	1	PAN3	0.504934
SPPL3	0.312757	-0.107132	0.073	0.104	1	SPPL3	0.504793
PITPNA	0.313018	0.11371	0.133	0.098	1	PITPNA	0.504431
SAFB2	0.31338	0.156619	0.287	0.244	1	SAFB2	0.503929
RPL36AL	0.313758	0.0878028	0.98	0.97	1	RPL36AL	0.503406
ORC3	0.313965	-0.0960049	0.073	0.104	1	ORC3	0.503119
ARL6IP5	0.314003	-0.0689443	0.787	0.799	1	ARL6IP5	0.503066
USP33	0.314208	-0.111804	0.227	0.268	1	USP33	0.502782
FGD3	0.314362	-0.0919866	0.18	0.22	1	FGD3	0.50257
PPA2	0.314465	0.0846622	0.127	0.091	1	PPA2	0.502428
TPP1	0.314641	-0.122131	0.207	0.25	1	TPP1	0.502185
RHBDF2	0.314766	0.0688714	0.113	0.079	1	RHBDF2	0.502012
IL10RA	0.314803	-0.0747616	0.46	0.524	1	IL10RA	0.501961
NSA2	0.315039	-0.0887147	0.447	0.5	1	NSA2	0.501636
RNF6	0.315331	0.0648957	0.2	0.152	1	RNF6	0.501233
ANKH	0.315599	-0.0794325	0.127	0.171	1	ANKH	0.500865
PNPLA2	0.315689	0.0889097	0.153	0.116	1	PNPLA2	0.50074
PRPS1	0.315689	0.0879305	0.153	0.116	1	PRPS1	0.50074
FAM13B	0.315798	0.113215	0.193	0.152	1	FAM13B	0.500591
EZR	0.316046	0.0743166	0.767	0.726	1	EZR	0.50025
RTCB	0.316269	0.0711572	0.247	0.195	1	RTCB	0.499944
DENND1B	0.316389	0.0880663	0.18	0.134	1	DENND1B	0.499778
BIN2	0.316734	0.128587	0.52	0.47	1	BIN2	0.499306
AC005332.5	0.316999	0.0666558	0.107	0.073	1	AC005332.5	0.498942
PNISR	0.317165	-0.0879396	0.813	0.854	1	PNISR	0.498714
SEPHS2	0.317578	0.0886576	0.267	0.213	1	SEPHS2	0.49815
ZNF37A	0.317797	-0.116616	0.18	0.22	1	ZNF37A	0.49785
PLRG1	0.317971	0.0887848	0.2	0.159	1	PLRG1	0.497612
KRIT1	0.31806	-0.0615574	0.147	0.189	1	KRIT1	0.497491
SERBP1	0.318141	0.100113	0.693	0.646	1	SERBP1	0.49738
AATF	0.318159	0.068454	0.347	0.287	1	AATF	0.497356
NDUFB11	0.318212	-0.0972871	0.593	0.616	1	NDUFB11	0.497283
CLEC2B	0.318277	0.0758207	0.78	0.744	1	CLEC2B	0.497194
LAG3	0.318338	0.180222	0.427	0.366	1	LAG3	0.497112
MBP	0.318399	0.0990581	0.7	0.677	1	MBP	0.497028
WDR54	0.318763	0.15334	0.24	0.201	1	WDR54	0.496532
TAGLN2	0.319152	0.154577	0.427	0.39	1	TAGLN2	0.496003
FLOT1	0.319637	0.072317	0.213	0.165	1	FLOT1	0.495343
ADCY7	0.319765	0.0898557	0.153	0.116	1	ADCY7	0.49517
REL	0.32013	0.108753	0.38	0.329	1	REL	0.494674
ANXA11	0.320168	-0.122877	0.427	0.47	1	ANXA11	0.494622
XPO1	0.32017	0.141221	0.247	0.201	1	XPO1	0.49462
DUT	0.320427	-0.0510303	0.207	0.262	1	DUT	0.494271
GGCT	0.320791	-0.0629075	0.12	0.159	1	GGCT	0.493778
SP3	0.321136	-0.0888939	0.187	0.226	1	SP3	0.49331
MBNL1	0.321165	0.0708589	0.72	0.659	1	MBNL1	0.493272
IMP3	0.321474	0.125464	0.42	0.378	1	IMP3	0.492855
WDR11	0.321552	-0.0796813	0.1	0.134	1	WDR11	0.492749
NMT1	0.321822	-0.103704	0.133	0.171	1	NMT1	0.492385
GIGYF1	0.322348	-0.101452	0.093	0.128	1	GIGYF1	0.491675
RHOC	0.322473	-0.133516	0.113	0.146	1	RHOC	0.491507
DNAJB11	0.322575	-0.100804	0.167	0.201	1	DNAJB11	0.49137
BCAS2	0.322843	-0.0848238	0.207	0.25	1	BCAS2	0.491008
YIF1A	0.323089	-0.11745	0.227	0.262	1	YIF1A	0.490677
GRK2	0.323365	-0.122392	0.467	0.494	1	GRK2	0.490307
ERO1A	0.323405	0.0975301	0.24	0.189	1	ERO1A	0.490253
CCND3	0.323485	0.0789481	0.393	0.354	1	CCND3	0.490146
GAB3	0.323598	0.126025	0.187	0.146	1	GAB3	0.489995
RDX	0.323639	0.0772328	0.193	0.146	1	RDX	0.48994
APIP	0.323669	-0.0566139	0.08	0.116	1	APIP	0.489898
GADD45A	0.324359	0.0578239	0.107	0.073	1	GADD45A	0.488974
CHD6	0.324768	-0.145094	0.14	0.177	1	CHD6	0.488427
CGRRF1	0.325125	-0.111819	0.093	0.122	1	CGRRF1	0.487949
CASP2	0.325454	0.0480043	0.113	0.079	1	CASP2	0.487511
C6orf48	0.325473	-0.089875	0.273	0.323	1	C6orf48	0.487485
CITED2	0.325621	-0.102777	0.173	0.213	1	CITED2	0.487287
MCTP2	0.325693	0.0636355	0.127	0.091	1	MCTP2	0.487192
FMNL1	0.326027	0.072139	0.6	0.524	1	FMNL1	0.486747
PLCL2	0.326054	-0.10394	0.08	0.11	1	PLCL2	0.48671
AL139246.5	0.326142	0.0720764	0.133	0.098	1	AL139246.5	0.486594
DYRK2	0.3262	-0.106233	0.313	0.354	1	DYRK2	0.486517
MAP3K7	0.326216	-0.0776063	0.073	0.104	1	MAP3K7	0.486494
TUBA1B	0.326289	0.10572	0.447	0.384	1	TUBA1B	0.486397
MIR4435-2HG	0.327849	0.193749	0.213	0.183	1	MIR4435-2HG	0.484327
TRIM23	0.329327	0.0522125	0.107	0.073	1	TRIM23	0.482373
TEX264	0.329929	-0.138803	0.26	0.299	1	TEX264	0.481579
TATDN3	0.329951	-0.0782058	0.073	0.104	1	TATDN3	0.48155
ARAP2	0.330147	-0.0977454	0.473	0.518	1	ARAP2	0.481293
XRRA1	0.330179	-0.0702865	0.087	0.122	1	XRRA1	0.48125
PRKAR2A	0.330188	0.141523	0.18	0.146	1	PRKAR2A	0.481238
CISH	0.330244	0.0858437	0.273	0.226	1	CISH	0.481165
EIF4EBP1	0.330557	0.0811398	0.207	0.159	1	EIF4EBP1	0.480753
THOC2	0.330601	-0.117579	0.28	0.323	1	THOC2	0.480695
CCDC186	0.330733	-0.0880539	0.247	0.293	1	CCDC186	0.480522
NPEPPS	0.331651	-0.102881	0.167	0.201	1	NPEPPS	0.479319
STK24	0.331969	-0.0657509	0.18	0.232	1	STK24	0.478903
SNUPN	0.33197	0.112161	0.16	0.122	1	SNUPN	0.478901
CENPB	0.332952	-0.079217	0.127	0.165	1	CENPB	0.477619
LIN7C	0.333225	-0.0952466	0.107	0.14	1	LIN7C	0.477263
CD3D	0.333274	-0.0485185	0.98	0.994	1	CD3D	0.477198
SPTBN1	0.333318	0.145298	0.167	0.134	1	SPTBN1	0.477141
LMF2	0.333318	0.0559132	0.173	0.128	1	LMF2	0.477141
ZNF830	0.333459	-0.110844	0.153	0.189	1	ZNF830	0.476957
SECISBP2L	0.333714	-0.0658874	0.073	0.104	1	SECISBP2L	0.476625
STAT3	0.333919	0.142849	0.453	0.421	1	STAT3	0.476359
SZRD1	0.334	0.058409	0.247	0.195	1	SZRD1	0.476253
CTR9	0.334531	0.111687	0.22	0.177	1	CTR9	0.475564
CAPN7	0.334539	-0.0840071	0.08	0.11	1	CAPN7	0.475554
PPP1CA	0.335056	-0.0598005	0.58	0.634	1	PPP1CA	0.474883
EIF2AK2	0.335075	-0.0611262	0.247	0.305	1	EIF2AK2	0.474858
INO80	0.335104	-0.116259	0.113	0.146	1	INO80	0.47482
TRAPPC6B	0.335179	0.154579	0.2	0.165	1	TRAPPC6B	0.474723
DICER1	0.335179	-0.0674682	0.193	0.238	1	DICER1	0.474723
ATG4D	0.335286	0.0493737	0.12	0.085	1	ATG4D	0.474584
MRPL50	0.335424	0.0396251	0.213	0.165	1	MRPL50	0.474406
BIRC3	0.335426	0.111045	0.293	0.238	1	BIRC3	0.474403
DZIP3	0.335464	0.116365	0.233	0.195	1	DZIP3	0.474355
NCBP2-AS2	0.335579	0.0804263	0.16	0.122	1	NCBP2-AS2	0.474205
DDX17	0.335729	-0.0673659	0.847	0.835	1	DDX17	0.474011
MRPL32	0.33657	0.0475627	0.26	0.213	1	MRPL32	0.472924
NGDN	0.336871	-0.0876038	0.073	0.104	1	NGDN	0.472537
SRRM2	0.336901	-0.0596058	0.68	0.689	1	SRRM2	0.472498
SRI	0.33704	0.053671	0.587	0.494	1	SRI	0.472319
TBK1	0.337104	-0.0612089	0.2	0.256	1	TBK1	0.472236
RNASEH1	0.337193	0.0761593	0.12	0.091	1	RNASEH1	0.472121
GATAD2B	0.33724	-0.113122	0.113	0.146	1	GATAD2B	0.472061
PSENEN	0.337259	0.0660548	0.213	0.165	1	PSENEN	0.472036
MRPL33	0.337568	0.0576977	0.347	0.287	1	MRPL33	0.471639
ATP13A1	0.33767	0.0582246	0.12	0.085	1	ATP13A1	0.471508
TGOLN2	0.337677	0.0737759	0.413	0.354	1	TGOLN2	0.471498
G3BP1	0.337855	-0.101023	0.267	0.311	1	G3BP1	0.471269
EID1	0.338091	0.123134	0.633	0.604	1	EID1	0.470967
ZNF600	0.338218	-0.105448	0.08	0.11	1	ZNF600	0.470803
ZHX1	0.338774	-0.0656338	0.073	0.104	1	ZHX1	0.47009
SPAST	0.338774	-0.108445	0.073	0.104	1	SPAST	0.47009
CCT5	0.338899	0.0604644	0.453	0.396	1	CCT5	0.46993
ZC3H18	0.3391	-0.0995141	0.213	0.256	1	ZC3H18	0.469673
MORF4L2	0.339214	-0.0636638	0.12	0.159	1	MORF4L2	0.469526
GLG1	0.339235	-0.101375	0.2	0.244	1	GLG1	0.469499
SLC25A45	0.339705	0.130661	0.153	0.122	1	SLC25A45	0.468898
CLP1	0.340047	-0.0685008	0.073	0.104	1	CLP1	0.468461
44076	0.340237	-0.067573	0.287	0.341	1	44076	0.468218
DAZAP1	0.340257	-0.0432839	0.12	0.159	1	DAZAP1	0.468193
PPP1CB	0.340374	-0.0446426	0.333	0.396	1	PPP1CB	0.468043
PTP4A2	0.340389	-0.0701237	0.707	0.75	1	PTP4A2	0.468024
LAP3	0.340848	-0.132594	0.147	0.183	1	LAP3	0.467439
NELFB	0.340877	-0.0901241	0.107	0.14	1	NELFB	0.467403
CMPK1	0.340931	-0.015951	0.28	0.341	1	CMPK1	0.467333
ZNF24	0.341053	-0.132974	0.307	0.329	1	ZNF24	0.467178
SMARCA5	0.341073	-0.106349	0.373	0.427	1	SMARCA5	0.467153
BATF	0.341088	0.0864666	0.353	0.305	1	BATF	0.467134
SNAPC2	0.341259	-0.100254	0.093	0.122	1	SNAPC2	0.466916
UBE2D1	0.341265	0.0630762	0.12	0.085	1	UBE2D1	0.466908
UQCC3	0.341721	-0.0653414	0.147	0.189	1	UQCC3	0.466328
SSB	0.341844	-0.0965073	0.473	0.524	1	SSB	0.466173
GIMAP1	0.342269	0.0647539	0.76	0.659	1	GIMAP1	0.465632
FBXO42	0.342543	0.0709917	0.113	0.079	1	FBXO42	0.465285
TTC5	0.342853	-0.10878	0.147	0.177	1	TTC5	0.464892
BZW1	0.342858	-0.0326651	0.473	0.524	1	BZW1	0.464885
WIPF1	0.343214	0.0738343	0.707	0.671	1	WIPF1	0.464435
COA5	0.343399	-0.115539	0.12	0.159	1	COA5	0.464201
CPNE3	0.343448	-0.125715	0.227	0.268	1	CPNE3	0.464139
CHORDC1	0.343543	-0.0696366	0.247	0.293	1	CHORDC1	0.464019
NASP	0.343706	0.157335	0.353	0.311	1	NASP	0.463813
ACTN4	0.343932	-0.115997	0.493	0.543	1	ACTN4	0.463528
ATP5PB	0.344087	-0.139999	0.333	0.372	1	ATP5PB	0.463332
AURKAIP1	0.344123	0.103514	0.58	0.524	1	AURKAIP1	0.463287
TBCE	0.344408	-0.0713543	0.08	0.11	1	TBCE	0.462927
ZBTB44	0.344886	0.103503	0.2	0.159	1	ZBTB44	0.462324
DLG1	0.344936	-0.0807813	0.153	0.189	1	DLG1	0.462262
SPSB3	0.345164	-0.142076	0.213	0.25	1	SPSB3	0.461975
ZNF518B	0.345168	-0.07316	0.073	0.104	1	ZNF518B	0.46197
SYNGR2	0.345497	-0.0954562	0.087	0.122	1	SYNGR2	0.461556
EXOC5	0.345635	-0.0555395	0.107	0.146	1	EXOC5	0.461382
EPC1	0.345678	-0.102569	0.36	0.409	1	EPC1	0.461328
ELAVL1	0.345861	-0.100761	0.18	0.213	1	ELAVL1	0.461099
NAE1	0.346386	-0.0463296	0.24	0.299	1	NAE1	0.460439
OSTM1	0.346411	-0.0768334	0.107	0.14	1	OSTM1	0.460409
ZNF326	0.347893	-0.0354923	0.087	0.122	1	ZNF326	0.458554
SPCS3	0.348216	-0.102806	0.347	0.39	1	SPCS3	0.458151
ETNK1	0.348369	0.0967237	0.213	0.171	1	ETNK1	0.457961
PECAM1	0.348408	0.0937925	0.207	0.171	1	PECAM1	0.457912
TPM4	0.348412	0.0918982	0.407	0.348	1	TPM4	0.457906
AP3D1	0.348801	0.0896156	0.18	0.146	1	AP3D1	0.457422
EXOSC8	0.349211	-0.0762326	0.173	0.213	1	EXOSC8	0.456912
HNRNPM	0.349308	0.0682975	0.593	0.518	1	HNRNPM	0.456792
CST7	0.34932	0.0447965	0.933	0.945	1	CST7	0.456777
RPS11	0.349371	0.0436716	0.987	0.976	1	RPS11	0.456713
PIK3C3	0.349411	-0.0740485	0.08	0.11	1	PIK3C3	0.456663
TRPC4AP	0.349737	0.0574274	0.16	0.122	1	TRPC4AP	0.456259
DMAC1	0.349758	-0.0565913	0.107	0.14	1	DMAC1	0.456232
MED30	0.349791	0.0814029	0.193	0.152	1	MED30	0.456191
XCL2	0.350043	-0.231694	0.193	0.232	1	XCL2	0.455879
SRPK1	0.350142	-0.0564767	0.193	0.244	1	SRPK1	0.455756
SUGP2	0.350238	-0.0895144	0.113	0.146	1	SUGP2	0.455637
FN3KRP	0.350277	0.107604	0.113	0.085	1	FN3KRP	0.455588
LMO4	0.350494	0.0852764	0.14	0.104	1	LMO4	0.455319
GUK1	0.350715	0.0615086	0.867	0.793	1	GUK1	0.455046
TTF1	0.350799	-0.0746004	0.14	0.183	1	TTF1	0.454942
CNOT9	0.35136	-0.0797419	0.14	0.177	1	CNOT9	0.454248
GTF3C1	0.351638	-0.0537921	0.073	0.104	1	GTF3C1	0.453904
MTPN	0.35166	-0.0809095	0.287	0.323	1	MTPN	0.453878
MTR	0.351712	0.0527837	0.147	0.11	1	MTR	0.453813
AGO2	0.351866	-0.0796422	0.12	0.159	1	AGO2	0.453623
RPL32	0.352264	0.0361975	1	1	1	RPL32	0.453131
REEP5	0.352423	-0.103229	0.673	0.713	1	REEP5	0.452935
TRBC1	0.352854	-0.137295	0.667	0.713	1	TRBC1	0.452405
TRIM27	0.352934	-0.069385	0.173	0.213	1	TRIM27	0.452306
LARP1	0.353424	0.0780522	0.267	0.226	1	LARP1	0.451704
RPL7L1	0.35356	0.0770891	0.36	0.311	1	RPL7L1	0.451537
HNRNPUL1	0.353849	-0.0529981	0.24	0.28	1	HNRNPUL1	0.451182
HMGA1	0.354147	0.0973797	0.353	0.299	1	HMGA1	0.450817
ABHD13	0.354247	-0.060969	0.073	0.104	1	ABHD13	0.450693
UBE2I	0.354267	-0.0199358	0.58	0.591	1	UBE2I	0.45067
CASP8AP2	0.354456	0.0776237	0.233	0.189	1	CASP8AP2	0.450438
PHF20L1	0.354824	-0.15575	0.293	0.317	1	PHF20L1	0.449987
SFXN3	0.355272	-0.0724762	0.087	0.116	1	SFXN3	0.449438
DSTN	0.355346	0.0780277	0.22	0.183	1	DSTN	0.449349
DBP	0.356174	0.0596149	0.147	0.11	1	DBP	0.448338
ARRDC1	0.356272	0.030286	0.267	0.207	1	ARRDC1	0.448218
LTN1	0.356272	-0.0609156	0.18	0.22	1	LTN1	0.448218
LYSMD2	0.356404	0.077101	0.367	0.317	1	LYSMD2	0.448058
MRPL47	0.356459	0.0770393	0.307	0.25	1	MRPL47	0.447991
SPPL2A	0.35677	0.0332879	0.293	0.238	1	SPPL2A	0.447611
ZNF638	0.35686	-0.0403733	0.32	0.372	1	ZNF638	0.447502
UQCRB	0.356863	0.0531192	0.907	0.89	1	UQCRB	0.447499
HDAC3	0.356966	-0.0634975	0.133	0.171	1	HDAC3	0.447374
ZMYM4	0.357337	-0.0352067	0.1	0.14	1	ZMYM4	0.446922
PAFAH1B1	0.357681	0.0670176	0.407	0.348	1	PAFAH1B1	0.446504
COX7A2L	0.357685	-0.0962896	0.493	0.488	1	COX7A2L	0.4465
TAF1B	0.357745	-0.0913269	0.087	0.116	1	TAF1B	0.446426
ACSS1	0.358184	-0.0556275	0.073	0.104	1	ACSS1	0.445893
MARCKSL1	0.358365	0.0282696	0.12	0.085	1	MARCKSL1	0.445675
S100A4	0.358717	-0.0805436	0.76	0.762	1	S100A4	0.445248
RNASEH2C	0.358849	0.134383	0.36	0.317	1	RNASEH2C	0.445088
DDX42	0.359014	0.0862648	0.233	0.189	1	DDX42	0.444888
ELMOD2	0.359239	0.0972803	0.133	0.104	1	ELMOD2	0.444617
TM9SF3	0.359318	-0.10245	0.273	0.317	1	TM9SF3	0.444521
CALCOCO2	0.35946	0.0591441	0.36	0.305	1	CALCOCO2	0.44435
LRRC8C	0.359543	0.0434866	0.147	0.11	1	LRRC8C	0.444249
EPSTI1	0.359632	0.11681	0.193	0.152	1	EPSTI1	0.444142
SMARCA2	0.359994	-0.0832324	0.247	0.293	1	SMARCA2	0.443705
NSUN5	0.360009	-0.117791	0.14	0.177	1	NSUN5	0.443687
COPE	0.361062	0.103491	0.66	0.64	1	COPE	0.442418
FBXL15	0.361089	-0.0892601	0.213	0.256	1	FBXL15	0.442386
RPS27L	0.361539	-0.123784	0.613	0.646	1	RPS27L	0.441845
MINDY2	0.361573	0.10719	0.133	0.104	1	MINDY2	0.441804
HLA-B	0.362011	-0.0429494	1	1	1	HLA-B	0.441278
MYL6B	0.362134	0.0352558	0.127	0.091	1	MYL6B	0.441131
MRPL35	0.362399	-0.0291865	0.113	0.152	1	MRPL35	0.440813
ENDOG	0.362635	0.0788478	0.16	0.122	1	ENDOG	0.440531
KIF2A	0.362868	-0.118884	0.42	0.439	1	KIF2A	0.440251
TAP2	0.363116	-0.0834275	0.153	0.189	1	TAP2	0.439954
PRH1	0.363545	-0.0753524	0.173	0.22	1	PRH1	0.439442
TAF3	0.363731	-0.130699	0.147	0.183	1	TAF3	0.439219
TMED7	0.364064	0.0805657	0.127	0.098	1	TMED7	0.438823
[truncated: 2,701 more rows]

## Sheet: S1C-C1 IgG vs. Bispecific
Table S1C: Differential Expression of Cluster 1 CD8 T cells IgG vs. Bispecific
	p_val	avg_logFC	pct.1	pct.2	p_val_adj	Gene_ID	logP
GZMB	4.71748e-07	0.649137	0.641	0.39	0.00952836	GZMB	6.32629
RPL29	7.77285e-06	0.186064	1	1	0.156996	RPL29	5.10942
RPL18A	0.000177478	0.162396	1	1	1	RPL18A	3.75086
RPLP1	0.000221203	0.157994	1	1	1	RPLP1	3.65521
MCPH1	0.000276275	0.276269	0.212	0.067	1	MCPH1	3.55866
AK3	0.00028968	0.252139	0.167	0.043	1	AK3	3.53808
UBA6	0.000371841	0.287738	0.288	0.122	1	UBA6	3.42964
RPS12	0.000407571	0.150303	1	1	1	RPS12	3.3898
CXXC1	0.000435016	0.260014	0.16	0.043	1	CXXC1	3.3615
NAA60	0.000440223	0.222119	0.199	0.061	1	NAA60	3.35633
CHSY1	0.000479633	0.206169	0.141	0.03	1	CHSY1	3.31909
NR2C2AP	0.000533051	0.203054	0.128	0.024	1	NR2C2AP	3.27323
PCNX2	0.000627456	0.261299	0.237	0.091	1	PCNX2	3.20242
CELF2	0.00077929	0.270145	0.641	0.445	1	CELF2	3.1083
RPL19	0.000816431	0.131667	1	1	1	RPL19	3.08808
LONP2	0.000834317	0.255035	0.269	0.116	1	LONP2	3.07867
TOPBP1	0.00098721	0.24813	0.173	0.055	1	TOPBP1	3.00559
PTPN22	0.000993152	0.241681	0.545	0.335	1	PTPN22	3.00298
IRF1	0.00122696	0.231362	0.904	0.75	1	IRF1	2.91117
RPS9	0.00141373	0.11382	1	1	1	RPS9	2.84963
UBE2F	0.00148938	0.229988	0.218	0.085	1	UBE2F	2.827
C12orf45	0.0015997	-0.243743	0.032	0.128	1	C12orf45	2.79596
LINC00893	0.00165633	0.174101	0.115	0.024	1	LINC00893	2.78085
JMY	0.00166844	-0.254613	0.026	0.116	1	JMY	2.77769
ACAA1	0.00179891	0.231574	0.333	0.171	1	ACAA1	2.74499
ZNF24	0.00197057	-0.372127	0.212	0.329	1	ZNF24	2.70541
ITM2C	0.00206588	-0.262249	0.788	0.866	1	ITM2C	2.68489
RPL27	0.00206944	0.163482	0.981	0.951	1	RPL27	2.68415
SS18L2	0.00227307	-0.274338	0.397	0.512	1	SS18L2	2.64339
ACTB	0.00231775	0.14296	1	1	1	ACTB	2.63493
PPIP5K2	0.00239039	0.211611	0.199	0.079	1	PPIP5K2	2.62153
ZNF720	0.00241974	-0.269949	0.103	0.226	1	ZNF720	2.61623
SNHG12	0.00251788	0.272219	0.282	0.14	1	SNHG12	2.59896
FBXO32	0.00275387	0.215485	0.128	0.037	1	FBXO32	2.56006
GSK3B	0.00277908	0.228357	0.167	0.061	1	GSK3B	2.5561
DNAJC10	0.00278178	0.219392	0.224	0.098	1	DNAJC10	2.55568
NDUFS1	0.00300963	0.257968	0.25	0.116	1	NDUFS1	2.52149
CRYZL1	0.00305886	-0.23359	0.058	0.159	1	CRYZL1	2.51444
TPT1	0.00307292	0.10677	1	1	1	TPT1	2.51245
RPS27A	0.00307292	0.102708	1	1	1	RPS27A	2.51245
CREB1	0.00320989	-0.294744	0.212	0.341	1	CREB1	2.49351
TPI1	0.00330723	0.274936	0.647	0.488	1	TPI1	2.48054
MRPL19	0.00356131	0.212794	0.288	0.152	1	MRPL19	2.44839
44085	0.00358835	-0.23718	0.064	0.171	1	44085	2.4451
NOL9	0.00360914	-0.230247	0.058	0.159	1	NOL9	2.4426
PSMA3-AS1	0.0036861	-0.262939	0.423	0.53	1	PSMA3-AS1	2.43343
CAPNS1	0.00376703	0.248	0.468	0.305	1	CAPNS1	2.424
FKBP2	0.003814	0.265404	0.596	0.433	1	FKBP2	2.41862
OTUD5	0.00399873	-0.213978	0.071	0.177	1	OTUD5	2.39808
KIFAP3	0.00401593	0.20699	0.122	0.037	1	KIFAP3	2.39621
PNISR	0.00411967	-0.284109	0.827	0.854	1	PNISR	2.38514
SOCS3	0.00412843	0.190493	0.103	0.024	1	SOCS3	2.38422
DENND4C	0.00430818	0.222341	0.16	0.061	1	DENND4C	2.36571
MAP2K2	0.00464	0.274211	0.66	0.537	1	MAP2K2	2.33348
MIB1	0.00468629	0.12994	0.103	0.024	1	MIB1	2.32917
AP2A1	0.00475877	-0.273232	0.051	0.14	1	AP2A1	2.3225
HNRNPR	0.00482821	-0.258361	0.468	0.579	1	HNRNPR	2.31621
BCL3	0.00504458	0.18017	0.122	0.037	1	BCL3	2.29717
RPL15	0.00520383	0.131941	1	1	1	RPL15	2.28368
CFL1	0.00545214	0.145364	0.994	0.982	1	CFL1	2.26343
AC243960.1	0.00564741	0.204102	0.263	0.134	1	AC243960.1	2.24815
LATS1	0.00579016	0.219375	0.205	0.091	1	LATS1	2.23731
ATP1A1	0.00620929	0.166863	0.423	0.262	1	ATP1A1	2.20696
USP22	0.00631665	-0.245446	0.09	0.189	1	USP22	2.19951
TLE4	0.00667813	0.245958	0.212	0.104	1	TLE4	2.17534
MX1	0.00673277	0.307825	0.256	0.128	1	MX1	2.17181
DCTN3	0.00676551	0.209367	0.385	0.232	1	DCTN3	2.1697
WBP11	0.0069948	0.163341	0.327	0.177	1	WBP11	2.15522
PQLC1	0.00702337	-0.203488	0.051	0.14	1	PQLC1	2.15345
RPL32	0.00724547	0.132972	1	1	1	RPL32	2.13993
MRFAP1L1	0.00724706	0.202364	0.288	0.159	1	MRFAP1L1	2.13984
UBE2W	0.00737935	0.205054	0.154	0.061	1	UBE2W	2.13198
OGDH	0.00763777	0.195592	0.173	0.073	1	OGDH	2.11703
TMED2	0.0077257	0.231509	0.391	0.244	1	TMED2	2.11206
LMNB1	0.00777294	-0.242828	0.051	0.134	1	LMNB1	2.10941
TXNDC11	0.0079466	0.167999	0.128	0.043	1	TXNDC11	2.09982
SP100	0.00804935	0.182498	0.654	0.482	1	SP100	2.09424
KPNA5	0.00838468	0.264467	0.205	0.104	1	KPNA5	2.07651
GOLGA3	0.00846172	0.162354	0.167	0.067	1	GOLGA3	2.07254
RBM3	0.00853114	0.232383	0.455	0.329	1	RBM3	2.06899
NAXE	0.00860085	0.210271	0.295	0.165	1	NAXE	2.06546
HNRNPU	0.00877074	-0.156813	0.776	0.896	1	HNRNPU	2.05696
RHOT2	0.00882655	0.225429	0.218	0.11	1	RHOT2	2.05421
NAA30	0.0092802	-0.175385	0.038	0.116	1	NAA30	2.03244
NIPSNAP1	0.00936311	0.1786	0.122	0.043	1	NIPSNAP1	2.02858
ITCH	0.00941142	0.236433	0.231	0.122	1	ITCH	2.02634
RUFY1	0.00948988	0.192978	0.212	0.104	1	RUFY1	2.02274
M6PR	0.00983961	0.178321	0.41	0.25	1	M6PR	2.00702
43896	0.00989352	0.181605	0.282	0.152	1	43896	2.00465
RPLP2	0.00996159	0.106956	0.987	0.994	1	RPLP2	2.00167
SKP1	0.0100205	-0.188598	0.756	0.768	1	SKP1	1.99911
CTDP1	0.0101158	0.157287	0.135	0.049	1	CTDP1	1.995
HAPLN3	0.0102593	0.137079	0.103	0.03	1	HAPLN3	1.98888
RPS18	0.0102975	0.112888	1	0.994	1	RPS18	1.98727
GNAI2	0.0107191	0.20356	0.737	0.628	1	GNAI2	1.96984
SLC27A3	0.0107983	-0.165818	0.032	0.104	1	SLC27A3	1.96665
TIMM50	0.0108109	0.158678	0.122	0.043	1	TIMM50	1.96614
C4orf48	0.0110104	0.181497	0.34	0.195	1	C4orf48	1.9582
RPA3	0.0112829	0.266174	0.333	0.201	1	RPA3	1.94758
GON4L	0.011309	0.157177	0.378	0.226	1	GON4L	1.94658
RPL35	0.0113469	0.123094	0.994	0.988	1	RPL35	1.94512
CC2D1B	0.0113783	0.162984	0.109	0.037	1	CC2D1B	1.94392
AMDHD2	0.0113784	0.165701	0.141	0.055	1	AMDHD2	1.94392
SLC39A4	0.0113947	0.147049	0.103	0.03	1	SLC39A4	1.9433
EEF1B2	0.0114081	0.167323	0.942	0.909	1	EEF1B2	1.94279
AL365361.1	0.0114405	-0.182382	0.045	0.122	1	AL365361.1	1.94156
CCL5	0.0114648	-0.12747	1	1	1	CCL5	1.94063
NIP7	0.0116216	-0.248148	0.237	0.341	1	NIP7	1.93473
CCDC142	0.0116822	-0.165023	0.032	0.104	1	CCDC142	1.93248
ATG2A	0.0117554	-0.200502	0.058	0.14	1	ATG2A	1.92976
TIMM23B	0.0117659	0.134233	0.103	0.03	1	TIMM23B	1.92938
CHTF8	0.0120061	0.158454	0.109	0.037	1	CHTF8	1.9206
APMAP	0.0120172	-0.260799	0.308	0.415	1	APMAP	1.9202
ARL6IP6	0.0121877	0.160976	0.224	0.11	1	ARL6IP6	1.91408
INTS4	0.0125923	-0.188363	0.045	0.122	1	INTS4	1.8999
ZNF276	0.0126814	0.231258	0.346	0.22	1	ZNF276	1.89683
FUNDC1	0.012869	0.169844	0.128	0.049	1	FUNDC1	1.89045
PTPRJ	0.0132807	0.15198	0.231	0.116	1	PTPRJ	1.87678
S1PR4	0.0135081	0.152518	0.59	0.427	1	S1PR4	1.86941
ZNF638	0.0136705	-0.179756	0.25	0.372	1	ZNF638	1.86422
ZNF7	0.0137192	-0.238665	0.103	0.195	1	ZNF7	1.86267
SOS1	0.0139424	-0.235763	0.186	0.293	1	SOS1	1.85566
MIA3	0.0141186	0.216414	0.353	0.22	1	MIA3	1.85021
RPL27A	0.0143724	0.110856	0.994	0.988	1	RPL27A	1.84247
GZMH	0.0147995	0.249572	0.692	0.555	1	GZMH	1.82975
POP7	0.0148509	0.186956	0.192	0.098	1	POP7	1.82825
HPRT1	0.0149596	0.23611	0.224	0.128	1	HPRT1	1.82508
FBH1	0.0149977	0.131889	0.167	0.073	1	FBH1	1.82397
DEF6	0.0151864	0.165791	0.365	0.226	1	DEF6	1.81855
GRK5	0.0153981	0.137337	0.109	0.037	1	GRK5	1.81253
TENT2	0.0154337	0.155339	0.205	0.104	1	TENT2	1.81153
RPS15	0.0154941	0.0972658	1	1	1	RPS15	1.80983
TIPARP	0.0157136	0.196515	0.103	0.037	1	TIPARP	1.80373
PCYT2	0.0159049	0.217158	0.122	0.049	1	PCYT2	1.79847
ADSS	0.0160681	0.215813	0.34	0.207	1	ADSS	1.79404
AC245297.3	0.0163103	0.243848	0.635	0.494	1	AC245297.3	1.78754
CHRAC1	0.0163542	0.175139	0.179	0.085	1	CHRAC1	1.78637
TRAC	0.0165549	-0.199996	0.981	0.988	1	TRAC	1.78107
TSPOAP1-AS1	0.0169372	0.169601	0.135	0.055	1	TSPOAP1-AS1	1.77116
TMEM248	0.0170019	-0.212949	0.263	0.366	1	TMEM248	1.7695
FASLG	0.0170407	-0.217484	0.295	0.402	1	FASLG	1.76851
CYB561A3	0.0170574	-0.159592	0.045	0.116	1	CYB561A3	1.76809
DTX3L	0.0172126	0.177659	0.327	0.195	1	DTX3L	1.76415
SUCLG2	0.017241	0.163245	0.205	0.104	1	SUCLG2	1.76344
DCAF10	0.0172874	0.162512	0.16	0.073	1	DCAF10	1.76227
SRSF1	0.0178539	-0.252127	0.186	0.287	1	SRSF1	1.74827
RALB	0.0184046	0.159273	0.115	0.043	1	RALB	1.73507
MORC3	0.0186361	0.210458	0.353	0.226	1	MORC3	1.72965
MMADHC	0.0188184	0.169871	0.301	0.183	1	MMADHC	1.72542
NUP214	0.0190671	-0.217863	0.077	0.159	1	NUP214	1.71971
EED	0.0190911	-0.286108	0.128	0.213	1	EED	1.71917
TBC1D17	0.0191758	-0.166396	0.045	0.116	1	TBC1D17	1.71725
ORMDL2	0.0192483	0.196691	0.462	0.311	1	ORMDL2	1.71561
UBE2B	0.0192505	-0.204199	0.455	0.573	1	UBE2B	1.71556
RSRP1	0.0194667	-0.167678	0.609	0.689	1	RSRP1	1.71071
SNRNP25	0.0196516	0.140933	0.179	0.085	1	SNRNP25	1.7066
FLII	0.0197925	0.15298	0.263	0.152	1	FLII	1.7035
PIGX	0.0197987	0.169541	0.154	0.073	1	PIGX	1.70336
TCEA1	0.0198164	-0.226245	0.442	0.543	1	TCEA1	1.70298
CDKN2A	0.0199137	-0.21925	0.135	0.232	1	CDKN2A	1.70085
NT5C3A	0.0200055	0.14046	0.224	0.116	1	NT5C3A	1.69885
PDZD8	0.0200218	-0.151922	0.058	0.134	1	PDZD8	1.6985
TTC1	0.0200454	-0.247229	0.237	0.335	1	TTC1	1.69799
CCL4	0.0201725	-0.654633	0.782	0.823	1	CCL4	1.69524
ELL	0.0203925	0.128589	0.103	0.037	1	ELL	1.69053
ANKRD13D	0.0205257	0.143076	0.468	0.323	1	ANKRD13D	1.6877
PET100	0.0206394	-0.231994	0.365	0.439	1	PET100	1.6853
PPP1CC	0.0206991	-0.239964	0.218	0.317	1	PPP1CC	1.68405
NKG7	0.0207164	0.15539	0.968	0.951	1	NKG7	1.68368
RUVBL2	0.0208451	0.128368	0.103	0.037	1	RUVBL2	1.681
TUBA1C	0.0213911	0.126064	0.231	0.122	1	TUBA1C	1.66977
RNPEPL1	0.0213998	0.144414	0.603	0.421	1	RNPEPL1	1.66959
RPS6	0.021463	0.106374	0.994	0.994	1	RPS6	1.66831
DENND6A	0.0218753	-0.169397	0.051	0.122	1	DENND6A	1.66005
RBM7	0.0219719	0.19714	0.231	0.128	1	RBM7	1.65813
ITM2B	0.0220479	0.10943	0.981	0.939	1	ITM2B	1.65663
CUX1	0.022147	0.171162	0.128	0.055	1	CUX1	1.65468
POLK	0.0221947	0.182507	0.25	0.146	1	POLK	1.65375
ZFP90	0.0222602	-0.146605	0.058	0.134	1	ZFP90	1.65247
RPP25L	0.0222884	0.132052	0.192	0.098	1	RPP25L	1.65192
ZDHHC5	0.022388	0.127329	0.186	0.091	1	ZDHHC5	1.64998
EML4	0.0224761	0.146776	0.609	0.427	1	EML4	1.64828
DDIT4	0.0224998	0.149582	0.474	0.335	1	DDIT4	1.64782
DYRK1B	0.0225801	0.135505	0.103	0.037	1	DYRK1B	1.64627
RAD9A	0.0226894	-0.203896	0.083	0.165	1	RAD9A	1.64418
MPHOSPH6	0.0228594	0.155103	0.199	0.104	1	MPHOSPH6	1.64094
ZNF429	0.0228902	-0.174032	0.051	0.122	1	ZNF429	1.64035
PSMB5	0.0229161	0.134459	0.256	0.14	1	PSMB5	1.63986
EBPL	0.0229347	0.116686	0.192	0.098	1	EBPL	1.63951
SPNS3	0.0230159	0.136099	0.122	0.049	1	SPNS3	1.63797
CD3D	0.023017	-0.133327	0.968	0.994	1	CD3D	1.63795
TRMU	0.0231564	0.166912	0.128	0.055	1	TRMU	1.63533
WDR26	0.02332	-0.20403	0.128	0.22	1	WDR26	1.63227
GIPC1	0.0236748	0.159248	0.212	0.11	1	GIPC1	1.62571
HEXA	0.0240642	0.0958659	0.314	0.177	1	HEXA	1.61863
SLC25A12	0.0240918	0.113254	0.103	0.037	1	SLC25A12	1.61813
RAB1A	0.0244315	0.180818	0.179	0.091	1	RAB1A	1.61205
IVNS1ABP	0.024507	0.0331229	0.212	0.11	1	IVNS1ABP	1.61071
SLC41A3	0.0245702	0.103858	0.122	0.049	1	SLC41A3	1.60959
MRPL44	0.0246674	0.167074	0.218	0.122	1	MRPL44	1.60788
APEX1	0.0247262	0.215033	0.321	0.201	1	APEX1	1.60684
EIF2B5	0.0249035	0.156902	0.186	0.098	1	EIF2B5	1.60374
TMEM179B	0.0249432	0.175399	0.353	0.226	1	TMEM179B	1.60305
CLASRP	0.024967	0.128935	0.147	0.067	1	CLASRP	1.60263
BRWD3	0.0251335	0.149341	0.109	0.043	1	BRWD3	1.59975
ESD	0.0253098	0.164829	0.359	0.238	1	ESD	1.59671
GBP2	0.0253185	0.150701	0.551	0.396	1	GBP2	1.59656
ANKRD36	0.0253233	0.165063	0.135	0.061	1	ANKRD36	1.59648
ARGLU1	0.0254883	-0.214073	0.583	0.689	1	ARGLU1	1.59366
RCN2	0.0256509	0.161206	0.397	0.268	1	RCN2	1.5909
TRIM23	0.0256821	0.151641	0.154	0.073	1	TRIM23	1.59037
RPL12	0.0259735	0.119398	1	0.994	1	RPL12	1.58547
CD2AP	0.0259748	0.173168	0.212	0.122	1	CD2AP	1.58545
RPS28	0.0262576	0.10157	0.994	0.976	1	RPS28	1.58074
TMEM63A	0.0263634	0.129534	0.109	0.043	1	TMEM63A	1.579
POU3F1	0.0264826	-0.155927	0.038	0.104	1	POU3F1	1.57704
PARP9	0.0265774	0.143556	0.321	0.195	1	PARP9	1.57549
S100A10	0.0266302	0.185491	0.865	0.774	1	S100A10	1.57463
FASTKD2	0.0270107	0.134819	0.167	0.079	1	FASTKD2	1.56846
COPA	0.0270729	0.16721	0.269	0.159	1	COPA	1.56747
MBD1	0.0274013	0.12574	0.147	0.067	1	MBD1	1.56223
POLE3	0.0275838	-0.17728	0.09	0.171	1	POLE3	1.55935
CSNK1D	0.0276947	0.143322	0.301	0.183	1	CSNK1D	1.5576
YARS2	0.0278958	0.156105	0.135	0.061	1	YARS2	1.55446
LAG3	0.02831	0.243877	0.481	0.366	1	LAG3	1.54806
TTC3	0.0284698	-0.201703	0.308	0.415	1	TTC3	1.54562
ENOSF1	0.0288016	-0.179958	0.064	0.134	1	ENOSF1	1.54058
CDC37	0.0290427	0.171554	0.468	0.323	1	CDC37	1.53696
FOXN2	0.0290714	0.133096	0.173	0.085	1	FOXN2	1.53653
TMEM242	0.0291267	0.155611	0.16	0.079	1	TMEM242	1.53571
SURF4	0.0294489	0.209403	0.462	0.335	1	SURF4	1.53093
HUWE1	0.030014	0.205115	0.263	0.165	1	HUWE1	1.52268
PLEKHM1	0.0301489	0.123326	0.135	0.061	1	PLEKHM1	1.52073
KDM5A	0.0304776	0.200309	0.455	0.323	1	KDM5A	1.51602
TM2D3	0.030642	0.181663	0.218	0.128	1	TM2D3	1.51368
LINC00861	0.0306542	-0.178712	0.468	0.561	1	LINC00861	1.51351
RPS2	0.0308099	0.0840053	1	1	1	RPS2	1.51131
RPS23	0.03081	0.0977456	1	1	1	RPS23	1.51131
BOD1L1	0.0308302	-0.233633	0.513	0.567	1	BOD1L1	1.51102
DGUOK	0.0309392	-0.20316	0.308	0.396	1	DGUOK	1.50949
YWHAG	0.0309555	0.154262	0.167	0.085	1	YWHAG	1.50926
EMC6	0.0312535	-0.231407	0.333	0.402	1	EMC6	1.5051
MTA2	0.0313954	0.1302	0.115	0.049	1	MTA2	1.50313
CAMK2G	0.03142	0.140019	0.141	0.067	1	CAMK2G	1.50279
C12orf43	0.0314256	0.118713	0.135	0.061	1	C12orf43	1.50272
NDUFV2	0.031586	0.152602	0.583	0.439	1	NDUFV2	1.50051
CUL4A	0.0315954	0.11868	0.16	0.079	1	CUL4A	1.50038
HERPUD2	0.0320046	0.208503	0.199	0.116	1	HERPUD2	1.49479
COA6	0.0320456	-0.227687	0.205	0.293	1	COA6	1.49423
DGKA	0.0323227	-0.183351	0.154	0.25	1	DGKA	1.49049
SNX17	0.0323322	0.181132	0.353	0.238	1	SNX17	1.49037
GTF2F1	0.0324316	0.128576	0.205	0.116	1	GTF2F1	1.48903
NUDCD3	0.0324952	0.147641	0.173	0.091	1	NUDCD3	1.48818
ZNF688	0.0326839	0.197956	0.218	0.128	1	ZNF688	1.48567
SUMO4	0.0328309	0.135537	0.173	0.091	1	SUMO4	1.48372
ID3	0.0328754	-0.302047	0.09	0.165	1	ID3	1.48313
SMC4	0.0330887	-0.265747	0.205	0.299	1	SMC4	1.48032
ASXL2	0.0331848	0.189718	0.244	0.146	1	ASXL2	1.47906
ASCC2	0.0333905	-0.207828	0.09	0.165	1	ASCC2	1.47638
RPL21	0.0334299	0.0880857	0.994	1	1	RPL21	1.47586
LBH	0.0334882	0.115198	0.603	0.451	1	LBH	1.47511
RPL34	0.0337325	0.0941694	1	1	1	RPL34	1.47195
CDK5RAP3	0.0338557	-0.154194	0.09	0.171	1	CDK5RAP3	1.47037
OXR1	0.0339519	0.161108	0.147	0.073	1	OXR1	1.46914
ACAD8	0.0341025	0.118591	0.115	0.049	1	ACAD8	1.46721
CCP110	0.0341205	0.140917	0.122	0.055	1	CCP110	1.46698
PDCD6IP	0.0343022	-0.158581	0.192	0.293	1	PDCD6IP	1.46468
RPL28	0.0350185	0.0575397	1	1	1	RPL28	1.4557
LRRC41	0.0353919	0.145205	0.122	0.055	1	LRRC41	1.4511
PLEK	0.0354213	0.124231	0.397	0.262	1	PLEK	1.45074
DCTN1	0.0354443	0.163439	0.173	0.091	1	DCTN1	1.45045
HDDC2	0.0355544	0.181198	0.417	0.299	1	HDDC2	1.44911
RAB29	0.035946	0.207937	0.365	0.238	1	RAB29	1.44435
RPN1	0.0359646	-0.187671	0.128	0.213	1	RPN1	1.44412
C19orf12	0.0361087	0.119178	0.16	0.079	1	C19orf12	1.44239
UTP18	0.036218	0.181681	0.135	0.067	1	UTP18	1.44108
SP110	0.0362412	0.197521	0.487	0.348	1	SP110	1.4408
MALAT1	0.0365082	-0.0758496	1	1	1	MALAT1	1.43761
LUC7L2	0.0366467	0.114862	0.231	0.128	1	LUC7L2	1.43597
TMED9	0.0366691	-0.208679	0.353	0.415	1	TMED9	1.4357
TRIM8	0.0368048	-0.228968	0.115	0.195	1	TRIM8	1.4341
PVT1	0.0368108	-0.116185	0.096	0.177	1	PVT1	1.43403
RANBP1	0.0368126	-0.223609	0.308	0.384	1	RANBP1	1.434
DYNC1LI2	0.0368441	-0.192054	0.16	0.25	1	DYNC1LI2	1.43363
TMEM69	0.0369459	-0.186529	0.058	0.122	1	TMEM69	1.43243
ISOC2	0.0371177	0.153593	0.154	0.079	1	ISOC2	1.43042
MRPL12	0.0372236	0.181217	0.244	0.152	1	MRPL12	1.42918
MBNL2	0.0372875	-0.174089	0.09	0.165	1	MBNL2	1.42844
CUL5	0.0373112	0.102527	0.276	0.165	1	CUL5	1.42816
SERBP1	0.037423	0.174441	0.75	0.646	1	SERBP1	1.42686
GLIPR1	0.0375741	-0.21249	0.397	0.463	1	GLIPR1	1.42511
MRPL13	0.0377179	0.0984826	0.269	0.165	1	MRPL13	1.42345
SSR1	0.0378002	-0.24929	0.212	0.305	1	SSR1	1.42251
H2AFY	0.0378714	0.197405	0.391	0.274	1	H2AFY	1.42169
RPS6KA5	0.0380112	-0.217481	0.064	0.134	1	RPS6KA5	1.42009
STAT1	0.0380366	0.161683	0.417	0.299	1	STAT1	1.4198
DEGS1	0.0383523	0.162231	0.327	0.207	1	DEGS1	1.41621
QKI	0.0384635	0.088998	0.16	0.079	1	QKI	1.41495
MEAF6	0.0389243	-0.232559	0.353	0.433	1	MEAF6	1.40978
TWISTNB	0.0391216	0.102321	0.186	0.098	1	TWISTNB	1.40758
BIRC3	0.0391609	0.167096	0.365	0.238	1	BIRC3	1.40715
NPEPPS	0.0391812	-0.23266	0.128	0.201	1	NPEPPS	1.40692
ISG15	0.0398417	0.235742	0.692	0.604	1	ISG15	1.39966
RBM17	0.0402171	-0.230141	0.205	0.287	1	RBM17	1.39559
CCNT1	0.0404853	-0.188697	0.045	0.104	1	CCNT1	1.3927
MCM6	0.0408455	-0.152622	0.058	0.122	1	MCM6	1.38886
IMPAD1	0.0408611	0.108745	0.103	0.043	1	IMPAD1	1.38869
TYW3	0.040976	0.155903	0.205	0.122	1	TYW3	1.38747
AKAP9	0.041495	-0.189824	0.481	0.567	1	AKAP9	1.382
PUM1	0.0417366	-0.240875	0.186	0.262	1	PUM1	1.37948
EFTUD2	0.0418723	0.0885746	0.122	0.055	1	EFTUD2	1.37807
SUPT16H	0.0427609	-0.22281	0.308	0.39	1	SUPT16H	1.36895
RBBP7	0.0427627	-0.199171	0.167	0.25	1	RBBP7	1.36894
ZNF224	0.0427813	-0.237175	0.205	0.28	1	ZNF224	1.36875
DDX17	0.0427938	-0.141595	0.833	0.835	1	DDX17	1.36862
ZNF430	0.0428217	-0.165051	0.205	0.305	1	ZNF430	1.36834
PBRM1	0.0428902	0.16545	0.327	0.22	1	PBRM1	1.36764
GBP1	0.0430418	0.185458	0.391	0.28	1	GBP1	1.36611
RYK	0.0431259	0.156887	0.135	0.067	1	RYK	1.36526
TRAF1	0.0432886	0.0896067	0.288	0.177	1	TRAF1	1.36363
ATP2B1	0.0433935	0.153916	0.16	0.085	1	ATP2B1	1.36258
LUC7L3	0.0437662	-0.103755	0.699	0.744	1	LUC7L3	1.35886
LMAN1	0.0438485	0.187799	0.385	0.268	1	LMAN1	1.35805
MDM1	0.0438794	0.102681	0.103	0.043	1	MDM1	1.35774
MYADM	0.0440064	-0.186835	0.192	0.274	1	MYADM	1.35648
SDCBP	0.0440207	0.147934	0.34	0.226	1	SDCBP	1.35634
LAPTM4A	0.0441096	0.0909081	0.346	0.226	1	LAPTM4A	1.35547
MYSM1	0.0441158	-0.150921	0.179	0.268	1	MYSM1	1.35541
FAM133B	0.0443773	0.204707	0.449	0.348	1	FAM133B	1.35284
DPF2	0.0446248	-0.19722	0.167	0.25	1	DPF2	1.35042
HMOX2	0.0447627	0.136226	0.417	0.287	1	HMOX2	1.34908
NTHL1	0.0447719	0.142289	0.128	0.061	1	NTHL1	1.34899
TTC39C	0.0450061	0.212403	0.462	0.348	1	TTC39C	1.34673
MSH6	0.0450308	0.146644	0.173	0.091	1	MSH6	1.34649
ZC3H6	0.0452518	-0.252248	0.096	0.165	1	ZC3H6	1.34436
CTSS	0.0453461	-0.225128	0.327	0.39	1	CTSS	1.34346
IFI27L2	0.0454103	-0.208025	0.327	0.409	1	IFI27L2	1.34285
RAB8A	0.0458866	-0.232965	0.417	0.488	1	RAB8A	1.33831
INIP	0.0462599	-0.146249	0.077	0.146	1	INIP	1.33479
C4orf3	0.0465166	0.0995586	0.763	0.616	1	C4orf3	1.33239
HNRNPDL	0.0466906	0.204214	0.686	0.53	1	HNRNPDL	1.33077
DGCR6L	0.0469345	0.172602	0.314	0.213	1	DGCR6L	1.32851
NUTM2B-AS1	0.0476795	-0.224102	0.308	0.378	1	NUTM2B-AS1	1.32167
COPB1	0.047837	-0.173216	0.256	0.348	1	COPB1	1.32024
ITPR2	0.0479518	0.176247	0.218	0.128	1	ITPR2	1.31919
DDX60L	0.0479753	0.0920381	0.173	0.091	1	DDX60L	1.31898
GPR137B	0.0481871	0.101607	0.128	0.061	1	GPR137B	1.31707
MAPKAPK5-AS1	0.048229	0.136404	0.186	0.104	1	MAPKAPK5-AS1	1.31669
AUP1	0.0485094	0.120885	0.269	0.171	1	AUP1	1.31417
GRSF1	0.0486753	0.152735	0.212	0.128	1	GRSF1	1.31269
HOOK3	0.0488238	0.165367	0.244	0.152	1	HOOK3	1.31137
TRIP12	0.0489218	0.143616	0.288	0.189	1	TRIP12	1.3105
WBP4	0.0489707	0.121222	0.16	0.085	1	WBP4	1.31006
CBLB	0.0489846	0.174755	0.378	0.256	1	CBLB	1.30994
SPTY2D1	0.0492036	0.156219	0.173	0.098	1	SPTY2D1	1.308
PTPN1	0.0493833	0.154129	0.301	0.195	1	PTPN1	1.30642
POLR2C	0.0494301	-0.209453	0.205	0.28	1	POLR2C	1.30601
ATM	0.0494657	-0.19248	0.603	0.665	1	ATM	1.3057
RBCK1	0.0495531	0.130895	0.455	0.317	1	RBCK1	1.30493
MAP4K5	0.0495906	0.136936	0.115	0.055	1	MAP4K5	1.3046
GTF2E2	0.0497774	-0.138841	0.09	0.165	1	GTF2E2	1.30297
CALM3	0.0498255	0.123104	0.603	0.482	1	CALM3	1.30255
MZT1	0.0498263	0.139352	0.212	0.122	1	MZT1	1.30254
TMEM187	0.0499168	-0.126706	0.051	0.11	1	TMEM187	1.30175
LRIG2	0.0499168	-0.1678	0.051	0.11	1	LRIG2	1.30175
SP140L	0.0500564	0.119217	0.327	0.213	1	SP140L	1.30054
ZBTB43	0.0502063	0.122352	0.154	0.079	1	ZBTB43	1.29924
CCND3	0.0503523	0.123177	0.474	0.354	1	CCND3	1.29798
RAB11B	0.0504658	0.20116	0.218	0.134	1	RAB11B	1.297
SELENOO	0.0506139	0.116168	0.109	0.049	1	SELENOO	1.29573
RPL7L1	0.0511125	0.150937	0.429	0.311	1	RPL7L1	1.29147
OAZ2	0.0513775	0.181901	0.154	0.085	1	OAZ2	1.28923
NSMCE2	0.0514013	0.135131	0.141	0.073	1	NSMCE2	1.28903
TTC14	0.0517264	-0.182957	0.353	0.445	1	TTC14	1.28629
UBE3C	0.0518082	0.130087	0.141	0.073	1	UBE3C	1.2856
GABPB1	0.0521673	0.096636	0.109	0.049	1	GABPB1	1.2826
CCDC66	0.052228	-0.234194	0.295	0.372	1	CCDC66	1.2821
UBQLN2	0.0526775	0.155666	0.154	0.085	1	UBQLN2	1.27837
DPY30	0.0532218	0.141446	0.41	0.28	1	DPY30	1.27391
RPL8	0.0536258	0.0954056	1	0.994	1	RPL8	1.27063
ITFG1	0.0537419	-0.147404	0.103	0.177	1	ITFG1	1.26969
NDUFC2	0.0538007	-0.141895	0.558	0.61	1	NDUFC2	1.26921
EDRF1	0.0538701	-0.173699	0.064	0.128	1	EDRF1	1.26865
NAE1	0.0539001	-0.134158	0.205	0.299	1	NAE1	1.26841
ABHD17A	0.0540647	0.0813855	0.673	0.524	1	ABHD17A	1.26709
PDRG1	0.0540713	-0.151651	0.058	0.116	1	PDRG1	1.26703
CCS	0.0541884	0.101322	0.199	0.116	1	CCS	1.26609
MRPL35	0.0542737	-0.123889	0.083	0.152	1	MRPL35	1.26541
ST8SIA4	0.0542863	0.181064	0.333	0.226	1	ST8SIA4	1.26531
IRAK1	0.0543208	0.133424	0.205	0.122	1	IRAK1	1.26503
WDR1	0.0543637	0.146657	0.423	0.311	1	WDR1	1.26469
ARL17A	0.0543891	0.141615	0.122	0.061	1	ARL17A	1.26449
FUT11	0.0545196	-0.161826	0.071	0.134	1	FUT11	1.26345
UQCC3	0.0545566	-0.16632	0.115	0.189	1	UQCC3	1.26315
RNASET2	0.0545831	-0.151643	0.353	0.451	1	RNASET2	1.26294
LDLRAD4	0.0546162	-0.196281	0.186	0.268	1	LDLRAD4	1.26268
ZNF791	0.0548066	0.212011	0.327	0.244	1	ZNF791	1.26117
AMD1	0.0551851	-0.197121	0.295	0.36	1	AMD1	1.25818
MRPS35	0.055723	-0.160698	0.103	0.171	1	MRPS35	1.25397
PICALM	0.0557593	0.15443	0.179	0.104	1	PICALM	1.25368
SINHCAF	0.0558222	0.166492	0.224	0.146	1	SINHCAF	1.25319
PNN	0.0560205	-0.152593	0.66	0.701	1	PNN	1.25165
UBE2Q1	0.0561054	0.155278	0.231	0.146	1	UBE2Q1	1.251
ODF2L	0.0563377	0.152713	0.5	0.39	1	ODF2L	1.2492
ANAPC11	0.0564954	0.0949779	0.468	0.341	1	ANAPC11	1.24799
ATP1B3	0.0566626	0.140971	0.417	0.293	1	ATP1B3	1.2467
NSF	0.0566891	0.189432	0.199	0.122	1	NSF	1.2465
ATP6AP2	0.0569599	0.139219	0.487	0.36	1	ATP6AP2	1.24443
RACK1	0.0570074	0.0906458	0.994	0.994	1	RACK1	1.24407
STAG1	0.0572998	-0.237459	0.135	0.201	1	STAG1	1.24185
DENND1C	0.057305	0.149185	0.154	0.085	1	DENND1C	1.24181
VAMP2	0.0580418	-0.132053	0.686	0.707	1	VAMP2	1.23626
EFHD2	0.0583535	0.150281	0.417	0.311	1	EFHD2	1.23393
UHMK1	0.0587573	0.146199	0.282	0.183	1	UHMK1	1.23094
ATP6V0B	0.0591315	0.10862	0.513	0.366	1	ATP6V0B	1.22818
MAPRE1	0.0595493	-0.17935	0.212	0.293	1	MAPRE1	1.22512
LTBP4	0.0599931	0.0936743	0.135	0.067	1	LTBP4	1.2219
RPL22	0.060056	0.0850906	0.974	0.933	1	RPL22	1.22144
EIF2D	0.0605268	-0.138803	0.058	0.116	1	EIF2D	1.21805
COMMD4	0.0607109	0.152734	0.237	0.146	1	COMMD4	1.21673
USP4	0.0607749	0.126033	0.147	0.079	1	USP4	1.21628
SLC25A5	0.0608555	0.146594	0.679	0.53	1	SLC25A5	1.2157
TOMM20	0.0608636	0.122649	0.596	0.482	1	TOMM20	1.21564
HAVCR2	0.060971	-0.154387	0.064	0.128	1	HAVCR2	1.21488
ANKRD36C	0.06113	-0.195536	0.141	0.22	1	ANKRD36C	1.21375
AGL	0.0612061	-0.139878	0.058	0.116	1	AGL	1.21321
JUNB	0.0616856	0.198999	0.5	0.378	1	JUNB	1.20982
RAB11FIP1	0.061734	0.095447	0.167	0.091	1	RAB11FIP1	1.20948
SPATS2L	0.0620758	-0.160506	0.064	0.122	1	SPATS2L	1.20708
CCDC71L	0.062116	0.108275	0.122	0.061	1	CCDC71L	1.2068
GABPB1-AS1	0.0621527	-0.187998	0.404	0.476	1	GABPB1-AS1	1.20654
LY75	0.062181	0.177279	0.109	0.055	1	LY75	1.20634
ZNF43	0.0627657	-0.138206	0.071	0.134	1	ZNF43	1.20228
ZFP62	0.0628518	-0.18583	0.083	0.146	1	ZFP62	1.20168
CASP8	0.0630677	0.147736	0.462	0.341	1	CASP8	1.20019
TBC1D4	0.0630803	0.050397	0.109	0.049	1	TBC1D4	1.20011
SAMD9	0.0632377	0.159197	0.558	0.482	1	SAMD9	1.19902
ITK	0.06329	-0.182531	0.25	0.329	1	ITK	1.19867
DDX42	0.0633236	0.128815	0.282	0.189	1	DDX42	1.19843
TMBIM1	0.0633316	0.146162	0.103	0.049	1	TMBIM1	1.19838
YTHDF2	0.0633552	0.147869	0.359	0.244	1	YTHDF2	1.19822
ZC3HAV1	0.0634942	0.11939	0.372	0.268	1	ZC3HAV1	1.19727
PTPN6	0.063858	0.226325	0.378	0.287	1	PTPN6	1.19478
ELP4	0.063953	0.121557	0.128	0.067	1	ELP4	1.19414
MCL1	0.0641336	0.105464	0.673	0.543	1	MCL1	1.19291
TMEM80	0.0641836	0.133119	0.122	0.061	1	TMEM80	1.19258
ADRM1	0.0641944	-0.160179	0.269	0.354	1	ADRM1	1.1925
SRP72	0.0646943	-0.235578	0.276	0.341	1	SRP72	1.18913
RALA	0.0648836	-0.204975	0.301	0.384	1	RALA	1.18787
SUPT6H	0.0649747	0.144392	0.212	0.128	1	SUPT6H	1.18726
IST1	0.0651059	0.151066	0.231	0.146	1	IST1	1.18638
PRPF31	0.0651999	0.135959	0.301	0.195	1	PRPF31	1.18575
CCDC137	0.0652802	0.0837427	0.16	0.085	1	CCDC137	1.18522
IDS	0.0658362	-0.180981	0.449	0.506	1	IDS	1.18153
ACTR6	0.0658769	0.125482	0.224	0.14	1	ACTR6	1.18127
PSMB7	0.0662739	-0.179327	0.295	0.366	1	PSMB7	1.17866
NAPEPLD	0.0663077	0.114401	0.122	0.061	1	NAPEPLD	1.17844
SERF2	0.0664212	0.0771482	0.981	0.976	1	SERF2	1.17769
XRN1	0.0665911	0.185072	0.41	0.299	1	XRN1	1.17658
HPS1	0.0667633	0.117753	0.147	0.079	1	HPS1	1.17546
APOL6	0.0668768	0.128003	0.404	0.287	1	APOL6	1.17472
LINC01943	0.0669165	-0.214308	0.288	0.372	1	LINC01943	1.17447
GNLY	0.0670306	0.463391	0.308	0.22	1	GNLY	1.17373
UBL5	0.0670958	-0.108	0.821	0.811	1	UBL5	1.1733
ST13	0.06728	-0.169256	0.359	0.421	1	ST13	1.17211
SH2D1A	0.0673853	0.172749	0.532	0.427	1	SH2D1A	1.17144
ITGA5	0.067421	0.115635	0.147	0.079	1	ITGA5	1.1712
SMARCC2	0.0674865	0.158966	0.314	0.22	1	SMARCC2	1.17078
KCTD17	0.0676083	-0.0923135	0.058	0.116	1	KCTD17	1.17
STIM2	0.0678535	0.127585	0.282	0.189	1	STIM2	1.16843
FBXL12	0.0681217	0.097411	0.122	0.061	1	FBXL12	1.16671
43897	0.0682717	0.14217	0.327	0.244	1	43897	1.16576
RPL13	0.0685067	0.0583239	1	1	1	RPL13	1.16427
MLLT10	0.0685579	0.150185	0.173	0.104	1	MLLT10	1.16394
KCTD5	0.0688165	0.128534	0.135	0.073	1	KCTD5	1.16231
ROCK2	0.0690937	-0.169858	0.09	0.152	1	ROCK2	1.16056
SF3B4	0.0691791	-0.177904	0.122	0.189	1	SF3B4	1.16003
AMIGO2	0.0692634	-0.141606	0.083	0.146	1	AMIGO2	1.1595
ANKRD49	0.0694266	0.0973195	0.295	0.195	1	ANKRD49	1.15847
RBBP5	0.0696061	-0.151512	0.051	0.104	1	RBBP5	1.15735
EEF1A1	0.0697082	0.0602087	1	1	1	EEF1A1	1.15672
CASP3	0.0697637	-0.182608	0.256	0.341	1	CASP3	1.15637
CALR	0.0699401	-0.175536	0.66	0.707	1	CALR	1.15527
MRPL39	0.0701566	-0.157365	0.109	0.177	1	MRPL39	1.15393
TFDP2	0.0702786	0.138808	0.128	0.067	1	TFDP2	1.15318
SCAMP1-AS1	0.0702786	0.110354	0.128	0.067	1	SCAMP1-AS1	1.15318
PEX2	0.0704049	0.147534	0.263	0.183	1	PEX2	1.1524
U2SURP	0.0704251	-0.156822	0.397	0.463	1	U2SURP	1.15227
PSMG1	0.0708303	0.0964262	0.103	0.049	1	PSMG1	1.14978
PRKAG2	0.0708341	-0.18216	0.071	0.128	1	PRKAG2	1.14976
MRPL28	0.0708422	-0.127146	0.224	0.317	1	MRPL28	1.14971
KRTCAP2	0.0709108	-0.178496	0.308	0.39	1	KRTCAP2	1.14929
CHD3	0.0712041	-0.156348	0.231	0.311	1	CHD3	1.1475
RPS17	0.071418	0.135505	0.231	0.146	1	RPS17	1.14619
CUTC	0.0717	0.124312	0.16	0.091	1	CUTC	1.14448
STRBP	0.0717297	-0.187796	0.141	0.207	1	STRBP	1.1443
SPATA13	0.0721496	-0.222249	0.244	0.317	1	SPATA13	1.14177
CDK2AP2	0.0722967	-0.197915	0.481	0.555	1	CDK2AP2	1.14088
CNIH4	0.0727383	-0.16451	0.154	0.226	1	CNIH4	1.13824
SPG11	0.0728827	-0.196931	0.147	0.22	1	SPG11	1.13738
SLMAP	0.0729381	0.114646	0.167	0.098	1	SLMAP	1.13705
YTHDC2	0.0730366	0.105325	0.16	0.091	1	YTHDC2	1.13646
SIT1	0.073135	0.159811	0.513	0.415	1	SIT1	1.13587
FBXO22	0.0731628	-0.236542	0.167	0.232	1	FBXO22	1.13571
RPS16	0.0732228	0.0690181	1	1	1	RPS16	1.13535
NDUFB8	0.0733432	-0.147441	0.538	0.585	1	NDUFB8	1.13464
UBXN7	0.0733617	0.200994	0.147	0.085	1	UBXN7	1.13453
NDUFB1	0.0734529	0.118721	0.417	0.299	1	NDUFB1	1.13399
MBD4	0.0734605	0.166603	0.282	0.207	1	MBD4	1.13395
MAP3K7	0.0736973	-0.145028	0.051	0.104	1	MAP3K7	1.13255
MMP25-AS1	0.0737799	-0.144114	0.173	0.25	1	MMP25-AS1	1.13206
ELOB	0.073995	0.130587	0.814	0.683	1	ELOB	1.1308
FBXL15	0.074095	-0.183735	0.186	0.256	1	FBXL15	1.13021
SNHG15	0.0743586	-0.1963	0.141	0.207	1	SNHG15	1.12867
NBEAL1	0.0745969	0.0609529	0.122	0.061	1	NBEAL1	1.12728
KLHL36	0.0746162	-0.147694	0.122	0.189	1	KLHL36	1.12717
CRELD2	0.0750003	-0.172696	0.179	0.25	1	CRELD2	1.12494
AIDA	0.0751536	-0.168569	0.173	0.25	1	AIDA	1.12405
ANXA6	0.0753678	0.118283	0.5	0.39	1	ANXA6	1.12281
RPS24	0.0754797	0.0743985	1	1	1	RPS24	1.12217
RPL6	0.0756784	0.0714732	0.994	0.988	1	RPL6	1.12103
UBXN2B	0.0762449	-0.129257	0.051	0.104	1	UBXN2B	1.11779
ARHGAP17	0.0763691	0.0893976	0.103	0.049	1	ARHGAP17	1.11708
EIF5A2	0.0763755	0.168417	0.115	0.061	1	EIF5A2	1.11705
OGT	0.0766175	0.0852975	0.474	0.329	1	OGT	1.11567
KCMF1	0.0766238	0.133919	0.282	0.189	1	KCMF1	1.11564
ZNF683	0.0768058	-0.177327	0.096	0.165	1	ZNF683	1.11461
PYURF	0.0768449	0.106187	0.468	0.335	1	PYURF	1.11438
ELK4	0.0769742	-0.149487	0.167	0.25	1	ELK4	1.11365
ATF7	0.077052	0.108175	0.109	0.055	1	ATF7	1.11322
IMP3	0.0770795	0.158029	0.5	0.378	1	IMP3	1.11306
NAT9	0.0772372	0.112532	0.135	0.073	1	NAT9	1.11217
CLEC2B	0.0773815	0.129614	0.833	0.744	1	CLEC2B	1.11136
PPP1R10	0.0774595	0.10879	0.365	0.268	1	PPP1R10	1.11093
CXCR4	0.0774621	-0.084246	0.577	0.646	1	CXCR4	1.11091
TUBA1A	0.0775499	0.153264	0.423	0.329	1	TUBA1A	1.11042
GNB5	0.0776479	0.149899	0.237	0.152	1	GNB5	1.10987
SMARCE1	0.0779125	0.137947	0.237	0.159	1	SMARCE1	1.10839
KDM5B	0.077917	0.199033	0.167	0.104	1	KDM5B	1.10837
BECN1	0.0781863	0.13553	0.192	0.116	1	BECN1	1.10687
MYL6	0.0782012	0.0695223	0.994	1	1	MYL6	1.10679
C16orf87	0.0783145	-0.182665	0.083	0.14	1	C16orf87	1.10616
DCAF11	0.0783441	0.17385	0.179	0.11	1	DCAF11	1.10599
RAB9A	0.0784044	0.0905822	0.256	0.165	1	RAB9A	1.10566
MYD88	0.0787612	0.0977603	0.179	0.104	1	MYD88	1.10369
WIPI2	0.0792556	-0.164695	0.173	0.25	1	WIPI2	1.10097
TBPL1	0.0792803	-0.234733	0.154	0.22	1	TBPL1	1.10083
GTF3C2	0.0796457	0.123913	0.109	0.055	1	GTF3C2	1.09884
BTN2A1	0.0800695	0.117706	0.141	0.079	1	BTN2A1	1.09653
GNL1	0.0801989	-0.184178	0.083	0.14	1	GNL1	1.09583
CCDC127	0.0803134	0.0861725	0.128	0.067	1	CCDC127	1.09521
SEC61B	0.0803495	-0.120395	0.776	0.768	1	SEC61B	1.09502
PGGHG	0.0803794	-0.13791	0.071	0.128	1	PGGHG	1.09486
KATNA1	0.0803917	0.102391	0.16	0.091	1	KATNA1	1.09479
PSMA4	0.0804299	0.13094	0.577	0.421	1	PSMA4	1.09458
SENP1	0.0806502	-0.112363	0.051	0.104	1	SENP1	1.09339
HNRNPF	0.0806822	-0.0935777	0.788	0.817	1	HNRNPF	1.09322
ATP2A3	0.0806844	0.119826	0.205	0.128	1	ATP2A3	1.09321
CDK4	0.0807088	-0.14602	0.103	0.165	1	CDK4	1.09308
EPSTI1	0.0809457	0.141214	0.237	0.152	1	EPSTI1	1.09181
RPS19	0.0811074	0.0750434	1	1	1	RPS19	1.09094
SLU7	0.0811527	-0.18371	0.173	0.25	1	SLU7	1.0907
STK38	0.0812285	0.152465	0.192	0.122	1	STK38	1.09029
RAF1	0.0814369	0.104795	0.212	0.134	1	RAF1	1.08918
XIAP	0.0814385	0.107209	0.327	0.226	1	XIAP	1.08917
CLIC3	0.0814965	-0.0853769	0.308	0.415	1	CLIC3	1.08886
ST8SIA1	0.0816111	0.100432	0.263	0.177	1	ST8SIA1	1.08825
ARPC3	0.0821392	0.0930383	0.974	0.915	1	ARPC3	1.08545
TMBIM6	0.0822491	-0.0996343	0.782	0.799	1	TMBIM6	1.08487
AC004585.1	0.0823144	-0.188929	0.103	0.165	1	AC004585.1	1.08452
RAB8B	0.0823322	-0.200133	0.288	0.348	1	RAB8B	1.08443
BCL2	0.0823753	-0.190933	0.231	0.311	1	BCL2	1.0842
IL7R	0.0823757	0.353897	0.314	0.244	1	IL7R	1.0842
C6orf106	0.0827199	0.114864	0.115	0.061	1	C6orf106	1.08239
UBE4B	0.082761	0.104207	0.109	0.055	1	UBE4B	1.08217
ARID1A	0.0828349	0.108273	0.301	0.201	1	ARID1A	1.08179
PSME1	0.0828359	0.0960416	0.904	0.823	1	PSME1	1.08178
VGLL4	0.0829731	0.0831465	0.16	0.091	1	VGLL4	1.08106
HECTD4	0.083214	0.101047	0.109	0.055	1	HECTD4	1.0798
CEBPD	0.0835939	0.126804	0.141	0.079	1	CEBPD	1.07783
ZSWIM8	0.0839862	0.127809	0.135	0.073	1	ZSWIM8	1.07579
TRIP11	0.0840724	0.11848	0.34	0.232	1	TRIP11	1.07535
HARS	0.0844109	0.100701	0.224	0.146	1	HARS	1.0736
TMSB10	0.0845354	0.0699788	1	1	1	TMSB10	1.07296
MRPL34	0.0847045	-0.148809	0.321	0.384	1	MRPL34	1.07209
NUDT2	0.085227	-0.106407	0.064	0.122	1	NUDT2	1.06942
TIMM8B	0.0852517	0.143137	0.327	0.232	1	TIMM8B	1.0693
HIPK3	0.085463	0.0993088	0.192	0.116	1	HIPK3	1.06822
GLUL	0.0855091	0.0962178	0.109	0.055	1	GLUL	1.06799
PYGO2	0.0856175	-0.133749	0.058	0.11	1	PYGO2	1.06744
IFT80	0.0856416	0.0942107	0.135	0.073	1	IFT80	1.06732
BRD9	0.0857366	-0.151555	0.096	0.159	1	BRD9	1.06683
FBXW5	0.0857612	0.152598	0.423	0.305	1	FBXW5	1.06671
RHOA	0.0858711	0.118418	0.801	0.677	1	RHOA	1.06615
PSAP	0.0858827	0.14293	0.256	0.165	1	PSAP	1.06609
SLC25A36	0.0859182	0.120886	0.173	0.104	1	SLC25A36	1.06591
NSD1	0.086034	-0.147231	0.391	0.463	1	NSD1	1.06533
TOR3A	0.0860596	0.092462	0.135	0.073	1	TOR3A	1.0652
THYN1	0.0862111	-0.202388	0.199	0.262	1	THYN1	1.06444
CLSTN1	0.086297	-0.179921	0.199	0.268	1	CLSTN1	1.064
PITPNM1	0.0864792	0.102994	0.135	0.073	1	PITPNM1	1.06309
ATP2B4	0.0867423	0.152786	0.346	0.25	1	ATP2B4	1.06177
OTULINL	0.0868181	0.130752	0.186	0.116	1	OTULINL	1.06139
ARID5A	0.086871	0.126406	0.359	0.256	1	ARID5A	1.06113
FLOT2	0.0871152	-0.121994	0.077	0.134	1	FLOT2	1.05991
DMTF1	0.0871744	-0.184547	0.154	0.22	1	DMTF1	1.05961
RNF13	0.0873795	-0.162779	0.135	0.195	1	RNF13	1.05859
TMEM116	0.0873819	0.0990561	0.109	0.055	1	TMEM116	1.05858
RPL39	0.0879673	0.0725202	1	1	1	RPL39	1.05568
TGFB1	0.087977	-0.220537	0.429	0.451	1	TGFB1	1.05563
C8orf82	0.0880972	0.120602	0.115	0.061	1	C8orf82	1.05504
DNAJC3	0.088273	-0.164855	0.186	0.256	1	DNAJC3	1.05417
RPLP0	0.088611	0.132773	0.962	0.921	1	RPLP0	1.05251
PPP2R5C	0.0890464	0.145507	0.731	0.665	1	PPP2R5C	1.05038
ABHD13	0.089099	0.106913	0.173	0.104	1	ABHD13	1.05013
COX4I1	0.0892853	0.100224	0.91	0.854	1	COX4I1	1.04922
VPS4A	0.0893339	-0.178517	0.109	0.171	1	VPS4A	1.04898
DESI1	0.0896944	0.091691	0.199	0.122	1	DESI1	1.04723
KLF6	0.0897249	-0.134433	0.763	0.811	1	KLF6	1.04709
TMEM8A	0.0897821	0.122036	0.154	0.091	1	TMEM8A	1.04681
CWF19L2	0.0900229	-0.200368	0.199	0.262	1	CWF19L2	1.04565
VEGFB	0.0901546	0.0777875	0.256	0.165	1	VEGFB	1.04501
RPL9	0.0903552	0.0661308	1	1	1	RPL9	1.04405
ALG8	0.0905011	-0.109492	0.071	0.128	1	ALG8	1.04335
SLC25A39	0.0905017	0.114684	0.212	0.134	1	SLC25A39	1.04334
SCAF8	0.0906283	0.0810496	0.173	0.104	1	SCAF8	1.04274
NDUFAF1	0.0908954	-0.14823	0.064	0.116	1	NDUFAF1	1.04146
CFAP20	0.0910306	-0.182206	0.071	0.122	1	CFAP20	1.04081
DHX38	0.0910338	0.14865	0.199	0.128	1	DHX38	1.0408
ZNF518A	0.0914008	0.0954526	0.173	0.104	1	ZNF518A	1.03905
CAST	0.0914194	0.102897	0.59	0.47	1	CAST	1.03896
RNF149	0.0914566	0.0966138	0.34	0.238	1	RNF149	1.03879
C1orf43	0.0915528	-0.136875	0.199	0.28	1	C1orf43	1.03833
CLK4	0.0917404	0.132151	0.301	0.207	1	CLK4	1.03744
NUDC	0.0917616	0.160973	0.462	0.372	1	NUDC	1.03734
NUP98	0.0921742	-0.169048	0.103	0.159	1	NUP98	1.03539
MUT	0.0926914	-0.130531	0.058	0.11	1	MUT	1.03296
ZNF350	0.0927338	-0.12096	0.071	0.128	1	ZNF350	1.03276
HTRA2	0.0927906	0.0872175	0.115	0.061	1	HTRA2	1.0325
BST2	0.0929205	0.141827	0.603	0.506	1	BST2	1.03189
DPM1	0.0929617	0.100772	0.173	0.104	1	DPM1	1.0317
SAT1	0.0931831	0.153095	0.372	0.268	1	SAT1	1.03066
MX2	0.0937501	0.128196	0.173	0.104	1	MX2	1.02803
SNAPC2	0.0937668	-0.153612	0.071	0.122	1	SNAPC2	1.02795
PTEN	0.0939633	0.114864	0.295	0.207	1	PTEN	1.02704
LINC00623	0.093965	0.154619	0.378	0.28	1	LINC00623	1.02703
TPMT	0.0942372	0.099759	0.115	0.061	1	TPMT	1.02578
SFT2D2	0.0949954	0.101864	0.186	0.116	1	SFT2D2	1.0223
SETD2	0.0950116	-0.128889	0.301	0.378	1	SETD2	1.02222
QARS	0.0954033	0.0831492	0.167	0.098	1	QARS	1.02044
UBR1	0.0954972	0.113365	0.192	0.122	1	UBR1	1.02001
TMED10	0.0955698	0.0876363	0.327	0.213	1	TMED10	1.01968
MIIP	0.0956167	0.128391	0.147	0.085	1	MIIP	1.01947
RGS14	0.0956388	0.136866	0.237	0.152	1	RGS14	1.01937
H3F3A	0.0957665	-0.0868659	0.974	0.982	1	H3F3A	1.01879
ATRX	0.095868	-0.165688	0.596	0.671	1	ATRX	1.01833
NDUFS5	0.0963647	-0.126995	0.782	0.756	1	NDUFS5	1.01608
SELENOM	0.0966898	-0.169023	0.16	0.226	1	SELENOM	1.01462
C5orf24	0.0967035	-0.183326	0.147	0.207	1	C5orf24	1.01456
ZC3H18	0.0967497	-0.179489	0.192	0.256	1	ZC3H18	1.01435
TMC8	0.0971333	0.130779	0.378	0.28	1	TMC8	1.01263
ZNF787	0.0972656	0.112571	0.154	0.091	1	ZNF787	1.01204
IFITM2	0.0975686	0.156281	0.609	0.5	1	IFITM2	1.01069
PPP1CB	0.0976374	-0.19106	0.34	0.396	1	PPP1CB	1.01038
IFI6	0.0977503	0.0716483	0.269	0.183	1	IFI6	1.00988
HSH2D	0.0979944	-0.143191	0.071	0.122	1	HSH2D	1.0088
RPL26	0.0980786	0.0721745	1	1	1	RPL26	1.00843
ADD3	0.0982733	-0.200867	0.244	0.305	1	ADD3	1.00756
TIMM13	0.098283	0.0797314	0.237	0.159	1	TIMM13	1.00752
COG4	0.0984464	-0.168904	0.077	0.128	1	COG4	1.0068
MBNL1	0.0986749	-0.128615	0.622	0.659	1	MBNL1	1.00579
CASP8AP2	0.0987191	0.09416	0.276	0.189	1	CASP8AP2	1.0056
RASA3	0.098754	0.147139	0.173	0.11	1	RASA3	1.00545
LSM1	0.0988009	0.109569	0.34	0.238	1	LSM1	1.00524
EAF1	0.0988118	-0.12255	0.064	0.116	1	EAF1	1.00519
TSPAN14	0.0988962	0.0913005	0.429	0.317	1	TSPAN14	1.00482
TOR2A	0.0989833	0.118142	0.128	0.073	1	TOR2A	1.00444
ZMYM5	0.0990064	0.0923863	0.173	0.104	1	ZMYM5	1.00434
RPL26L1	0.0990609	0.112392	0.179	0.11	1	RPL26L1	1.0041
HLA-B	0.0991884	-0.0596454	1	1	1	HLA-B	1.00354
NOP56	0.0993602	0.0953527	0.308	0.213	1	NOP56	1.00279
PAPOLG	0.0994593	0.139461	0.128	0.073	1	PAPOLG	1.00235
MIR155HG	0.0998748	-0.233368	0.115	0.171	1	MIR155HG	1.00054
GCH1	0.0999371	0.146921	0.128	0.073	1	GCH1	1.00027
STIM1	0.100028	0.0774948	0.147	0.085	1	STIM1	0.999876
CBX7	0.100204	0.132602	0.237	0.165	1	CBX7	0.999115
DHDDS	0.100327	0.0688444	0.135	0.073	1	DHDDS	0.998583
HLTF	0.100461	0.0969076	0.173	0.104	1	HLTF	0.998002
CYB561D2	0.100527	0.149785	0.269	0.189	1	CYB561D2	0.997719
AHCTF1	0.100555	0.105268	0.205	0.128	1	AHCTF1	0.997595
ARHGAP35	0.100694	0.121447	0.179	0.11	1	ARHGAP35	0.996996
PDE12	0.100733	0.107785	0.16	0.098	1	PDE12	0.996829
CTDSP2	0.100916	-0.206776	0.122	0.177	1	CTDSP2	0.996038
CREBRF	0.101325	0.153835	0.256	0.177	1	CREBRF	0.994283
ERN1	0.102033	0.106512	0.122	0.067	1	ERN1	0.991257
TMEM120B	0.102098	-0.168249	0.186	0.256	1	TMEM120B	0.990983
SETX	0.102565	-0.161201	0.346	0.409	1	SETX	0.989
MLXIP	0.102717	-0.175779	0.077	0.128	1	MLXIP	0.988356
LSP1	0.102733	-0.150346	0.679	0.689	1	LSP1	0.988289
ANKRD12	0.102773	-0.125999	0.827	0.805	1	ANKRD12	0.988123
GNPDA1	0.102902	0.155312	0.147	0.091	1	GNPDA1	0.987577
N4BP1	0.102983	0.0936055	0.385	0.262	1	N4BP1	0.987236
ABCE1	0.103282	0.109983	0.269	0.189	1	ABCE1	0.985976
HP1BP3	0.104082	-0.157979	0.494	0.567	1	HP1BP3	0.982626
EIF4G3	0.104178	-0.114137	0.109	0.171	1	EIF4G3	0.982222
PQLC3	0.104284	0.0916293	0.263	0.177	1	PQLC3	0.98178
THUMPD2	0.10432	0.100783	0.128	0.073	1	THUMPD2	0.981631
CCDC32	0.104467	0.115284	0.244	0.165	1	CCDC32	0.98102
TBC1D1	0.104616	-0.140505	0.141	0.201	1	TBC1D1	0.980403
HOOK2	0.104875	0.0673154	0.115	0.061	1	HOOK2	0.979326
SNRPB	0.105002	0.0750311	0.699	0.604	1	SNRPB	0.978803
AC092683.1	0.105034	-0.116236	0.192	0.262	1	AC092683.1	0.978671
GNL3	0.105194	-0.162117	0.103	0.159	1	GNL3	0.97801
KHDC4	0.105199	-0.119027	0.103	0.165	1	KHDC4	0.97799
UQCR10	0.105247	-0.0854299	0.705	0.762	1	UQCR10	0.97779
ACAA2	0.105291	0.157289	0.301	0.22	1	ACAA2	0.977608
UFC1	0.105302	0.0977244	0.519	0.402	1	UFC1	0.977564
RPP38	0.105336	-0.168351	0.122	0.183	1	RPP38	0.977422
MRNIP	0.105523	-0.161922	0.083	0.134	1	MRNIP	0.976654
SAMD1	0.10577	-0.17051	0.09	0.14	1	SAMD1	0.975639
KAT6A	0.106773	-0.166668	0.25	0.317	1	KAT6A	0.971538
SEL1L3	0.107123	-0.191598	0.154	0.213	1	SEL1L3	0.970116
REV1	0.107143	0.0680692	0.122	0.067	1	REV1	0.970037
DNAJB11	0.107799	-0.154465	0.141	0.201	1	DNAJB11	0.967386
SUB1	0.107893	0.0813253	0.904	0.866	1	SUB1	0.967007
CAPZA1	0.107924	-0.216465	0.526	0.543	1	CAPZA1	0.966882
NOP53	0.107946	0.086819	0.782	0.713	1	NOP53	0.966792
AL390728.6	0.108436	0.0464164	0.141	0.079	1	AL390728.6	0.964827
ACBD6	0.10888	0.0781481	0.173	0.104	1	ACBD6	0.963052
UQCR11	0.109095	-0.110989	0.615	0.677	1	UQCR11	0.962196
IPO9	0.109145	0.124055	0.192	0.122	1	IPO9	0.961996
FRYL	0.109518	0.0628393	0.276	0.183	1	FRYL	0.960516
PRR5	0.109883	0.0961652	0.128	0.073	1	PRR5	0.959068
CDC40	0.109963	-0.20572	0.276	0.329	1	CDC40	0.958753
CHIC2	0.110128	0.142944	0.212	0.146	1	CHIC2	0.958101
MRPS33	0.110193	0.111125	0.34	0.25	1	MRPS33	0.957845
AGTRAP	0.110413	-0.177552	0.083	0.134	1	AGTRAP	0.956979
THUMPD3	0.11054	-0.121547	0.071	0.122	1	THUMPD3	0.956481
TRAPPC12	0.110662	-0.144205	0.083	0.134	1	TRAPPC12	0.956001
HLA-DPA1	0.11075	-0.089979	0.795	0.86	1	HLA-DPA1	0.955657
CDK5RAP1	0.110817	0.0799046	0.115	0.061	1	CDK5RAP1	0.955395
COPE	0.110974	0.119783	0.724	0.64	1	COPE	0.954779
RNF214	0.111063	0.0978548	0.16	0.098	1	RNF214	0.954432
B3GALT4	0.111209	0.0768058	0.237	0.152	1	B3GALT4	0.953858
SH3GLB1	0.111386	-0.182069	0.417	0.488	1	SH3GLB1	0.953168
GDAP2	0.11144	0.0811476	0.128	0.073	1	GDAP2	0.952957
PINK1	0.111595	0.12993	0.103	0.055	1	PINK1	0.952357
KLF12	0.111661	-0.179095	0.128	0.189	1	KLF12	0.952098
ATP6V1G1	0.111845	0.14012	0.744	0.665	1	ATP6V1G1	0.951385
APBA3	0.111963	0.107076	0.128	0.073	1	APBA3	0.950924
PDCL	0.112035	-0.193849	0.109	0.165	1	PDCL	0.950647
EEA1	0.112306	0.162947	0.147	0.091	1	EEA1	0.949597
CHMP3	0.112312	-0.182484	0.122	0.177	1	CHMP3	0.949574
SPTLC2	0.112469	0.0963061	0.16	0.098	1	SPTLC2	0.948966
PHF20L1	0.112611	-0.186268	0.263	0.317	1	PHF20L1	0.948419
SLC1A5	0.11266	-0.132593	0.071	0.122	1	SLC1A5	0.94823
PPIL3	0.112881	0.111317	0.179	0.116	1	PPIL3	0.947377
SDCCAG8	0.113551	0.137091	0.167	0.104	1	SDCCAG8	0.944809
LYPLA2	0.113554	0.0892927	0.212	0.134	1	LYPLA2	0.944799
DNPH1	0.114501	-0.138855	0.365	0.445	1	DNPH1	0.941192
MINK1	0.114812	-0.128734	0.071	0.122	1	MINK1	0.940012
RPS14	0.114824	0.057528	1	1	1	RPS14	0.939969
MAP2K7	0.114909	-0.148447	0.147	0.213	1	MAP2K7	0.939648
GIMAP4	0.115076	0.0965917	0.923	0.884	1	GIMAP4	0.939013
ARHGEF7	0.115678	0.0997815	0.128	0.073	1	ARHGEF7	0.936749
CHID1	0.115729	0.0941686	0.135	0.079	1	CHID1	0.936557
ZNF143	0.115748	0.078606	0.147	0.085	1	ZNF143	0.936487
SLC25A28	0.115998	-0.149452	0.083	0.134	1	SLC25A28	0.935551
RPSA	0.116502	0.0825336	0.994	0.988	1	RPSA	0.933666
MRM2	0.116757	0.094177	0.128	0.073	1	MRM2	0.932717
BIRC2	0.117139	0.134862	0.244	0.171	1	BIRC2	0.9313
PRH1	0.117183	0.0953609	0.308	0.22	1	PRH1	0.931134
CLIP1	0.117208	0.105461	0.321	0.226	1	CLIP1	0.931042
SPTBN1	0.11722	0.151393	0.199	0.134	1	SPTBN1	0.930997
PTPN7	0.11769	-0.14022	0.641	0.665	1	PTPN7	0.92926
PSMD7	0.117804	0.0530868	0.404	0.299	1	PSMD7	0.928841
NORAD	0.118145	0.10942	0.212	0.14	1	NORAD	0.927583
TROVE2	0.11829	0.156468	0.282	0.213	1	TROVE2	0.927053
HPS3	0.119068	-0.172848	0.122	0.177	1	HPS3	0.924205
PTPN2	0.119082	0.140232	0.269	0.195	1	PTPN2	0.924156
CASK	0.119088	0.128192	0.231	0.159	1	CASK	0.924131
FLNA	0.11918	0.139993	0.558	0.457	1	FLNA	0.923795
TSPAN3	0.119213	-0.116066	0.071	0.122	1	TSPAN3	0.923676
ANKRD13A	0.119299	0.167984	0.179	0.122	1	ANKRD13A	0.923365
TRGC1	0.11932	0.0668229	0.147	0.085	1	TRGC1	0.923288
TRIM13	0.11948	-0.140552	0.179	0.25	1	TRIM13	0.922705
CNOT6	0.119638	-0.0923506	0.058	0.104	1	CNOT6	0.922131
ZNF12	0.119726	0.114392	0.179	0.116	1	ZNF12	0.921811
PIK3CG	0.119877	0.125065	0.16	0.104	1	PIK3CG	0.921264
IKBKB	0.119969	0.114839	0.167	0.104	1	IKBKB	0.920929
NSUN2	0.120004	0.11092	0.115	0.067	1	NSUN2	0.920805
DPM2	0.120224	0.0962195	0.186	0.116	1	DPM2	0.920008
UBN1	0.120292	-0.195833	0.224	0.287	1	UBN1	0.919764
NUS1	0.120309	0.123506	0.109	0.061	1	NUS1	0.919703
PPP1CA	0.120391	0.10405	0.737	0.634	1	PPP1CA	0.919407
AGO3	0.120464	-0.142476	0.128	0.189	1	AGO3	0.919142
DHX36	0.120492	0.110336	0.474	0.366	1	DHX36	0.919041
TAB2	0.120532	0.122033	0.199	0.134	1	TAB2	0.918897
MXD4	0.120735	0.0563875	0.628	0.47	1	MXD4	0.918168
SRSF5	0.120819	-0.125927	0.712	0.732	1	SRSF5	0.917866
NAGK	0.121208	-0.180627	0.103	0.152	1	NAGK	0.916468
MRPL36	0.121267	-0.172345	0.276	0.323	1	MRPL36	0.916259
ACTR1A	0.121399	0.101305	0.173	0.11	1	ACTR1A	0.915786
CCDC167	0.121726	-0.164521	0.327	0.396	1	CCDC167	0.914616
RAC2	0.122018	0.108014	0.833	0.823	1	RAC2	0.913574
RPS10	0.12223	0.0874472	0.891	0.817	1	RPS10	0.912822
FRMD4B	0.122397	-0.145573	0.077	0.128	1	FRMD4B	0.912229
DDX19B	0.122514	0.0875266	0.103	0.055	1	DDX19B	0.911816
ATXN2L	0.122553	-0.130775	0.115	0.177	1	ATXN2L	0.911675
MLH3	0.122707	0.125295	0.141	0.085	1	MLH3	0.911132
ZEB2	0.122788	0.0779454	0.282	0.195	1	ZEB2	0.910845
RABEP2	0.122828	0.0641798	0.103	0.055	1	RABEP2	0.910702
EIF4E3	0.122833	0.0727409	0.128	0.073	1	EIF4E3	0.910684
NCOR1	0.12312	-0.162576	0.583	0.616	1	NCOR1	0.909671
SPSB3	0.12315	-0.218677	0.192	0.25	1	SPSB3	0.909564
TMA7	0.123397	-0.0934056	0.872	0.86	1	TMA7	0.908695
RPL7	0.12353	0.0831636	0.974	0.921	1	RPL7	0.908228
RPL14	0.123558	0.0551372	0.994	0.994	1	RPL14	0.908129
ELP5	0.123727	-0.213808	0.103	0.152	1	ELP5	0.907534
UROS	0.123822	0.0990324	0.173	0.11	1	UROS	0.907204
NEK7	0.123961	-0.168616	0.192	0.25	1	NEK7	0.906716
WASHC4	0.124048	0.102315	0.141	0.085	1	WASHC4	0.906411
ARFGEF1	0.124094	0.0993302	0.218	0.146	1	ARFGEF1	0.906251
ATP6V1F	0.124453	-0.147509	0.372	0.445	1	ATP6V1F	0.904995
MTFR1L	0.124557	0.0937083	0.109	0.061	1	MTFR1L	0.904633
FLYWCH2	0.124883	-0.152008	0.109	0.165	1	FLYWCH2	0.903495
GNG2	0.124944	-0.151652	0.327	0.378	1	GNG2	0.903285
NDUFA12	0.125041	-0.104028	0.532	0.585	1	NDUFA12	0.902948
TFIP11	0.125194	-0.133754	0.058	0.104	1	TFIP11	0.902417
RANBP2	0.125349	-0.131291	0.173	0.238	1	RANBP2	0.901881
EEF2	0.125377	0.0855179	0.821	0.72	1	EEF2	0.901783
TRIM28	0.125658	0.110299	0.231	0.159	1	TRIM28	0.900811
CCDC28A	0.125676	0.0756544	0.128	0.073	1	CCDC28A	0.900749
VMP1	0.125723	0.0310048	0.673	0.53	1	VMP1	0.900586
ATP5F1E	0.126078	-0.0892049	0.987	0.957	1	ATP5F1E	0.89936
TRBC1	0.126159	-0.278166	0.679	0.713	1	TRBC1	0.89908
SLC39A1	0.126287	-0.168348	0.103	0.152	1	SLC39A1	0.89864
SH2D3A	0.126333	0.0846652	0.103	0.055	1	SH2D3A	0.898482
LCMT1	0.126472	0.128451	0.192	0.128	1	LCMT1	0.898007
UBE2M	0.126571	0.13269	0.481	0.36	1	UBE2M	0.897666
RPL10	0.126682	0.0533537	1	1	1	RPL10	0.897284
ITM2A	0.126938	-0.106483	0.628	0.652	1	ITM2A	0.896407
DLGAP1-AS1	0.126986	0.122735	0.212	0.14	1	DLGAP1-AS1	0.896244
ANKRD17	0.127044	-0.141688	0.154	0.22	1	ANKRD17	0.896047
CIRBP	0.128201	-0.10794	0.564	0.61	1	CIRBP	0.892107
LY6E	0.128331	0.0756516	0.705	0.579	1	LY6E	0.891669
AKIRIN2	0.128632	-0.187087	0.173	0.232	1	AKIRIN2	0.890651
IFRD1	0.129029	0.0463743	0.122	0.067	1	IFRD1	0.889313
NDUFAF8	0.129452	-0.151113	0.308	0.348	1	NDUFAF8	0.88789
UBE2G2	0.12949	0.0867418	0.25	0.171	1	UBE2G2	0.887764
RTCA	0.129599	0.106995	0.237	0.159	1	RTCA	0.887397
RASSF5	0.129819	-0.163155	0.295	0.36	1	RASSF5	0.886662
NFYC	0.130195	0.12777	0.122	0.073	1	NFYC	0.885405
METTL2A	0.130365	0.0907859	0.141	0.085	1	METTL2A	0.884838
ORMDL1	0.130737	-0.112622	0.526	0.591	1	ORMDL1	0.8836
MFSD11	0.130806	0.108285	0.173	0.11	1	MFSD11	0.883372
CD151	0.130827	0.0986784	0.109	0.061	1	CD151	0.883303
OGFRL1	0.130827	0.0923201	0.109	0.061	1	OGFRL1	0.883303
EIF4E	0.130834	0.117441	0.25	0.177	1	EIF4E	0.88328
CCNC	0.130846	0.122052	0.224	0.152	1	CCNC	0.88324
NUP93	0.130847	-0.154555	0.071	0.116	1	NUP93	0.883236
TGFBR2	0.130945	-0.219136	0.25	0.299	1	TGFBR2	0.882912
TNRC6A	0.131362	-0.153125	0.115	0.171	1	TNRC6A	0.88153
VPS13C	0.131394	0.0990317	0.494	0.354	1	VPS13C	0.881426
PPIA	0.131552	0.0751714	0.897	0.787	1	PPIA	0.880902
SYAP1	0.13165	0.113772	0.186	0.122	1	SYAP1	0.880578
CLNS1A	0.131758	0.105282	0.321	0.226	1	CLNS1A	0.880224
MAN1B1	0.131828	0.0917252	0.173	0.11	1	MAN1B1	0.879991
CDC25B	0.131887	0.174451	0.218	0.152	1	CDC25B	0.879798
SSH2	0.131983	-0.13953	0.109	0.165	1	SSH2	0.87948
SMAP1	0.132069	0.146125	0.301	0.22	1	SMAP1	0.879199
NRBP1	0.132098	-0.151974	0.212	0.268	1	NRBP1	0.879104
CFAP36	0.13222	0.11141	0.154	0.098	1	CFAP36	0.878704
C6orf226	0.132236	0.0591369	0.103	0.055	1	C6orf226	0.878651
ELOVL1	0.132243	0.162332	0.167	0.11	1	ELOVL1	0.878628
IARS	0.132337	0.101192	0.141	0.085	1	IARS	0.87832
ARIH1	0.132355	0.0545564	0.179	0.116	1	ARIH1	0.878258
PFDN5	0.132451	0.064941	0.929	0.951	1	PFDN5	0.877945
EIF2B2	0.132755	0.105345	0.109	0.061	1	EIF2B2	0.87695
ERAP2	0.132757	0.0699068	0.346	0.25	1	ERAP2	0.876941
RPUSD2	0.132905	0.0761067	0.103	0.055	1	RPUSD2	0.87646
SYNE3	0.132905	0.0465952	0.103	0.055	1	SYNE3	0.87646
SLC4A1AP	0.133029	-0.144132	0.122	0.177	1	SLC4A1AP	0.876055
GFI1	0.133032	-0.112657	0.096	0.152	1	GFI1	0.876043
DTYMK	0.133167	0.182692	0.16	0.104	1	DTYMK	0.875604
SERPINB6	0.133306	0.0882592	0.128	0.073	1	SERPINB6	0.875151
ARHGAP25	0.133381	0.099467	0.423	0.311	1	ARHGAP25	0.874906
TSR1	0.133892	0.144847	0.115	0.067	1	TSR1	0.873244
THADA	0.13395	-0.152878	0.096	0.146	1	THADA	0.873058
DDB1	0.134	0.0938013	0.237	0.165	1	DDB1	0.872896
NDUFS7	0.134314	0.0717938	0.436	0.323	1	NDUFS7	0.87188
DDRGK1	0.134366	0.111479	0.308	0.232	1	DDRGK1	0.871712
LSM4	0.134558	0.0528116	0.34	0.238	1	LSM4	0.871091
NELL2	0.134669	-0.104077	0.083	0.134	1	NELL2	0.870731
TFRC	0.134705	0.084358	0.109	0.061	1	TFRC	0.870617
LINC01934	0.134865	0.124982	0.192	0.134	1	LINC01934	0.870101
MAD2L2	0.134944	0.0984498	0.154	0.098	1	MAD2L2	0.869847
XIST	0.135104	-0.170151	0.526	0.573	1	XIST	0.869333
HMG20B	0.135136	0.10286	0.205	0.14	1	HMG20B	0.869228
SAT2	0.135566	0.0873002	0.327	0.238	1	SAT2	0.867848
SNTB2	0.135649	0.109695	0.186	0.122	1	SNTB2	0.867584
DUSP16	0.135669	-0.115536	0.077	0.128	1	DUSP16	0.867518
OSBPL8	0.13574	0.12059	0.359	0.268	1	OSBPL8	0.867291
RPL3	0.135789	0.0565384	1	1	1	RPL3	0.867136
ST6GALNAC4	0.135792	0.0843663	0.115	0.067	1	ST6GALNAC4	0.867125
METTL2B	0.135938	0.111603	0.147	0.091	1	METTL2B	0.866659
UBE2J2	0.135965	0.112209	0.269	0.189	1	UBE2J2	0.866573
ANKRD11	0.136114	-0.135469	0.538	0.598	1	ANKRD11	0.866096
DENND4B	0.13643	0.0891286	0.115	0.067	1	DENND4B	0.86509
MRPS5	0.136769	-0.159051	0.25	0.311	1	MRPS5	0.864014
RBM5	0.137056	0.0852615	0.353	0.25	1	RBM5	0.863101
UPF2	0.137264	0.152262	0.327	0.244	1	UPF2	0.862442
MGA	0.137478	0.0646996	0.218	0.14	1	MGA	0.861767
RAP2B	0.137712	0.096594	0.154	0.098	1	RAP2B	0.861029
PRKCSH	0.138092	0.0919246	0.173	0.11	1	PRKCSH	0.85983
DHX16	0.138357	0.107096	0.115	0.067	1	DHX16	0.858998
RPS4X	0.138505	0.0733348	1	1	1	RPS4X	0.858536
TNRC6C	0.138952	0.119212	0.244	0.171	1	TNRC6C	0.857136
NUP153	0.139112	0.113001	0.154	0.098	1	NUP153	0.856636
C12orf10	0.139189	0.0922301	0.224	0.152	1	C12orf10	0.856396
SUGP2	0.139294	0.0931601	0.218	0.146	1	SUGP2	0.856069
MAN2B2	0.139341	0.0748887	0.109	0.061	1	MAN2B2	0.855922
MAP4K1	0.139341	0.0989062	0.237	0.159	1	MAP4K1	0.85592
C2orf69	0.139398	0.0664345	0.135	0.079	1	C2orf69	0.855742
KDM7A	0.139571	0.087685	0.179	0.116	1	KDM7A	0.855206
TPR	0.13991	-0.100918	0.551	0.616	1	TPR	0.854151
FAAP20	0.140302	0.0851899	0.333	0.238	1	FAAP20	0.852935
HIST1H1C	0.140316	-0.144894	0.186	0.244	1	HIST1H1C	0.852894
WHAMM	0.140523	0.109946	0.154	0.098	1	WHAMM	0.852253
WDR20	0.140523	0.0860833	0.154	0.098	1	WDR20	0.852253
LSG1	0.140538	0.147208	0.128	0.079	1	LSG1	0.852207
ABCB7	0.140568	-0.0951829	0.064	0.11	1	ABCB7	0.852113
HEXIM1	0.140688	0.0929614	0.109	0.061	1	HEXIM1	0.851744
APOL1	0.140831	-0.148331	0.103	0.152	1	APOL1	0.851303
GCLM	0.14085	-0.140254	0.224	0.28	1	GCLM	0.851243
WAC	0.14116	0.119587	0.417	0.317	1	WAC	0.850289
DNASE1	0.14162	-0.146318	0.135	0.189	1	DNASE1	0.848875
MAP3K8	0.141947	0.130044	0.122	0.073	1	MAP3K8	0.847875
SNHG8	0.141982	0.0848133	0.314	0.226	1	SNHG8	0.847766
DERL1	0.142011	0.0693534	0.308	0.213	1	DERL1	0.847677
CEP78	0.142115	-0.158547	0.109	0.165	1	CEP78	0.847361
ARRB2	0.142134	0.137827	0.365	0.287	1	ARRB2	0.847303
SELPLG	0.142268	0.098741	0.346	0.25	1	SELPLG	0.846894
SRSF2	0.142518	-0.0848359	0.494	0.567	1	SRSF2	0.846132
ANXA7	0.14298	-0.181565	0.308	0.366	1	ANXA7	0.844726
CLOCK	0.143183	-0.135642	0.077	0.122	1	CLOCK	0.844109
BRI3	0.14374	0.104551	0.391	0.293	1	BRI3	0.842423
C1orf131	0.143816	-0.110729	0.173	0.244	1	C1orf131	0.842192
UBAC1	0.144025	0.0680698	0.147	0.091	1	UBAC1	0.841563
SNRNP48	0.144099	0.0756862	0.109	0.061	1	SNRNP48	0.84134
USP20	0.144099	0.0768539	0.109	0.061	1	USP20	0.84134
TRABD	0.14433	0.142751	0.429	0.329	1	TRABD	0.840645
DGKD	0.144521	0.0961775	0.122	0.073	1	DGKD	0.840068
DAXX	0.144733	0.102578	0.295	0.213	1	DAXX	0.839432
CEBPG	0.144846	0.103115	0.122	0.073	1	CEBPG	0.839095
ZBED4	0.144934	0.0796161	0.115	0.067	1	ZBED4	0.83883
TSTD1	0.145011	-0.143065	0.41	0.476	1	TSTD1	0.8386
RPL11	0.145059	0.055561	1	1	1	RPL11	0.838454
GMPR2	0.145324	0.109209	0.173	0.116	1	GMPR2	0.837662
TMEM101	0.14552	-0.147271	0.128	0.177	1	TMEM101	0.837076
IFNG-AS1	0.145822	0.108418	0.122	0.073	1	IFNG-AS1	0.836177
ARHGAP9	0.146247	-0.126983	0.372	0.445	1	ARHGAP9	0.834914
CDC42SE2	0.146419	0.0948303	0.763	0.677	1	CDC42SE2	0.834402
WTAP	0.146606	-0.138301	0.353	0.415	1	WTAP	0.833849
STAG2	0.146767	0.131151	0.436	0.341	1	STAG2	0.833371
UBE4A	0.146803	0.0693813	0.135	0.079	1	UBE4A	0.833264
LDHB	0.147515	0.0937854	0.776	0.689	1	LDHB	0.831163
SIRT2	0.147622	0.126391	0.199	0.134	1	SIRT2	0.830849
UBE2J1	0.147631	0.0860824	0.115	0.067	1	UBE2J1	0.830824
UQCC2	0.147729	0.0377389	0.212	0.14	1	UQCC2	0.830535
ARMC8	0.147841	0.0723325	0.199	0.128	1	ARMC8	0.830206
PI4KB	0.14845	0.0821429	0.122	0.073	1	PI4KB	0.828419
DBNL	0.148529	0.026793	0.327	0.232	1	DBNL	0.82819
DNAJC9	0.148545	0.120222	0.192	0.128	1	DNAJC9	0.828141
EI24	0.148563	-0.0971985	0.083	0.134	1	EI24	0.828089
COX8A	0.148789	-0.0958659	0.667	0.701	1	COX8A	0.827428
OLA1	0.148862	0.106432	0.212	0.146	1	OLA1	0.827217
ANKRD26	0.148993	0.0909984	0.115	0.067	1	ANKRD26	0.826834
CHAMP1	0.149021	0.0445006	0.103	0.055	1	CHAMP1	0.826754
RBM4	0.149173	-0.149374	0.205	0.256	1	RBM4	0.826309
ST3GAL2	0.149196	0.11615	0.173	0.116	1	ST3GAL2	0.826244
OCIAD1	0.149324	0.0734354	0.487	0.366	1	OCIAD1	0.825869
KPNB1	0.149342	0.108044	0.429	0.317	1	KPNB1	0.825818
TBL1XR1	0.149352	-0.144096	0.34	0.415	1	TBL1XR1	0.82579
CPNE1	0.149392	0.144229	0.372	0.287	1	CPNE1	0.825673
ATP6V0D1	0.149403	0.0842685	0.269	0.189	1	ATP6V0D1	0.825641
MAU2	0.149636	-0.143262	0.077	0.122	1	MAU2	0.824965
TMEM126A	0.149936	0.0994	0.256	0.183	1	TMEM126A	0.824094
ORAI1	0.149993	0.109666	0.519	0.421	1	ORAI1	0.823929
CDC34	0.150111	-0.107662	0.096	0.146	1	CDC34	0.823589
CNOT3	0.150134	-0.118388	0.071	0.116	1	CNOT3	0.82352
UBAP2L	0.150169	0.0791991	0.173	0.11	1	UBAP2L	0.823419
XCL2	0.15024	-0.272327	0.173	0.232	1	XCL2	0.823214
BCOR	0.150714	-0.110704	0.096	0.146	1	BCOR	0.821846
TNIP1	0.150728	0.0667456	0.244	0.171	1	TNIP1	0.821806
CHI3L2	0.150814	0.115253	0.167	0.11	1	CHI3L2	0.821559
RAP1GDS1	0.150824	-0.12683	0.109	0.159	1	RAP1GDS1	0.82153
PDCD11	0.151002	0.110967	0.128	0.079	1	PDCD11	0.821018
AAK1	0.151011	-0.115938	0.481	0.543	1	AAK1	0.820991
LCORL	0.151055	0.090137	0.115	0.067	1	LCORL	0.820865
HIF1A	0.151153	0.0870638	0.314	0.232	1	HIF1A	0.820584
APOL3	0.151346	0.101148	0.288	0.213	1	APOL3	0.820028
HSP90AA1	0.151406	-0.0891971	0.929	0.915	1	HSP90AA1	0.819856
IRF9	0.151491	0.140425	0.25	0.183	1	IRF9	0.819613
GORASP2	0.151494	-0.11081	0.071	0.116	1	GORASP2	0.819606
QDPR	0.151747	0.0809483	0.115	0.067	1	QDPR	0.818879
NOP58	0.151749	-0.12588	0.301	0.378	1	NOP58	0.818874
MSH3	0.151982	0.121933	0.128	0.079	1	MSH3	0.818208
PDCD7	0.152429	0.117415	0.269	0.195	1	PDCD7	0.816932
FNIP1	0.152552	-0.151522	0.083	0.128	1	FNIP1	0.816582
HIVEP3	0.152638	0.0859091	0.128	0.079	1	HIVEP3	0.816338
RABGAP1L	0.153077	-0.197184	0.301	0.341	1	RABGAP1L	0.815089
HIST3H2A	0.153476	0.0907204	0.122	0.073	1	HIST3H2A	0.81396
NSMCE4A	0.15379	0.109913	0.218	0.152	1	NSMCE4A	0.813073
WDR54	0.153792	0.125691	0.269	0.201	1	WDR54	0.813067
DOCK10	0.153832	-0.140374	0.237	0.287	1	DOCK10	0.812952
AKAP10	0.153838	0.0665053	0.115	0.067	1	AKAP10	0.812936
HM13	0.154056	0.0832724	0.34	0.25	1	HM13	0.812322
RPF1	0.154116	-0.15006	0.167	0.226	1	RPF1	0.812152
MEA1	0.154239	0.135083	0.256	0.183	1	MEA1	0.811806
RBMXL1	0.154289	0.129351	0.135	0.085	1	RBMXL1	0.811666
YBX1	0.154672	-0.121591	0.788	0.835	1	YBX1	0.810589
SNX10	0.154834	-0.118976	0.09	0.14	1	SNX10	0.810134
CNN2	0.154884	0.101704	0.391	0.305	1	CNN2	0.809993
C17orf75	0.154956	-0.110808	0.077	0.122	1	C17orf75	0.809793
METTL4	0.154958	-0.124692	0.096	0.14	1	METTL4	0.809787
PDS5A	0.155072	0.120232	0.199	0.134	1	PDS5A	0.809467
NSUN5	0.155243	0.0755781	0.25	0.177	1	NSUN5	0.808989
AGFG1	0.155475	0.0877778	0.179	0.116	1	AGFG1	0.808339
HNRNPA3	0.155788	-0.0990255	0.756	0.762	1	HNRNPA3	0.807465
RFLNB	0.155927	0.133284	0.237	0.171	1	RFLNB	0.80708
ZNF593	0.156015	0.117565	0.173	0.116	1	ZNF593	0.806834
REL	0.156406	-0.150695	0.263	0.329	1	REL	0.805747
SDHD	0.156445	-0.167274	0.308	0.354	1	SDHD	0.805639
ZBTB1	0.156625	-0.176502	0.269	0.323	1	ZBTB1	0.805139
CMPK1	0.156853	0.114587	0.449	0.341	1	CMPK1	0.804508
RPS11	0.15692	0.0707974	0.987	0.976	1	RPS11	0.804323
AFTPH	0.157088	-0.128116	0.115	0.165	1	AFTPH	0.803858
PMEPA1	0.15756	-0.147152	0.135	0.189	1	PMEPA1	0.802555
RPA1	0.157804	-0.120502	0.083	0.128	1	RPA1	0.801882
XBP1	0.158211	0.0728303	0.25	0.177	1	XBP1	0.800764
SERGEF	0.15843	-0.111106	0.071	0.116	1	SERGEF	0.800162
ALOX5AP	0.158542	0.138943	0.66	0.567	1	ALOX5AP	0.799857
ING5	0.158695	-0.128991	0.077	0.122	1	ING5	0.799436
MAEA	0.158739	0.0616141	0.147	0.091	1	MAEA	0.799318
ELMO2	0.158802	0.067831	0.115	0.067	1	ELMO2	0.799145
LCK	0.158824	-0.123603	0.827	0.841	1	LCK	0.799083
RPS5	0.159057	0.0735167	0.981	1	1	RPS5	0.798448
PTPN18	0.159188	0.0892322	0.224	0.152	1	PTPN18	0.79809
HSPA5	0.159457	-0.112694	0.481	0.537	1	HSPA5	0.797357
STAU2	0.159613	0.10156	0.167	0.11	1	STAU2	0.796933
PTPRE	0.159839	-0.126179	0.147	0.201	1	PTPRE	0.796318
MCUB	0.159925	0.0834036	0.41	0.305	1	MCUB	0.796084
DEXI	0.160096	-0.15444	0.122	0.171	1	DEXI	0.79562
CSNK2A2	0.160307	0.086453	0.205	0.14	1	CSNK2A2	0.795049
TPGS1	0.160618	-0.0876301	0.218	0.28	1	TPGS1	0.794206
CSNK1G2	0.161174	0.10927	0.372	0.287	1	CSNK1G2	0.792704
RSF1	0.161282	0.118558	0.429	0.348	1	RSF1	0.792413
LCP2	0.161294	0.107308	0.494	0.39	1	LCP2	0.792383
RGP1	0.161363	0.0857098	0.128	0.079	1	RGP1	0.792196
PUM3	0.161537	-0.135891	0.109	0.159	1	PUM3	0.791729
IDH3B	0.161741	0.0295577	0.218	0.146	1	IDH3B	0.791181
CCDC82	0.162072	-0.147594	0.263	0.317	1	CCDC82	0.790293
SART1	0.162314	0.102032	0.192	0.134	1	SART1	0.789643
EIF4ENIF1	0.162462	0.107285	0.103	0.061	1	EIF4ENIF1	0.789248
HNRNPLL	0.162746	-0.124601	0.16	0.22	1	HNRNPLL	0.788489
TRIM25	0.162846	0.0744696	0.122	0.073	1	TRIM25	0.788223
RPS3A	0.162848	0.0554744	1	1	1	RPS3A	0.788219
RDH11	0.163334	-0.118741	0.199	0.256	1	RDH11	0.786923
TRIM44	0.163518	0.111937	0.199	0.14	1	TRIM44	0.786436
TXNRD1	0.163526	0.104156	0.135	0.085	1	TXNRD1	0.786413
BORCS6	0.163666	0.112707	0.173	0.116	1	BORCS6	0.786041
ARPP19	0.16389	-0.118559	0.256	0.323	1	ARPP19	0.785448
PRRC2C	0.163945	-0.149406	0.808	0.811	1	PRRC2C	0.785301
PPP2R2D	0.164245	-0.105705	0.115	0.165	1	PPP2R2D	0.784508
KDM3B	0.164817	0.0922625	0.128	0.079	1	KDM3B	0.782997
IKBKE	0.164879	0.114195	0.135	0.085	1	IKBKE	0.782835
AKR1A1	0.164893	0.127385	0.282	0.207	1	AKR1A1	0.782799
POLR2J	0.16503	-0.182164	0.404	0.421	1	POLR2J	0.782437
CHD2	0.165036	-0.196304	0.321	0.372	1	CHD2	0.782422
SLC35C2	0.165332	-0.133564	0.103	0.152	1	SLC35C2	0.781644
BRD8	0.165361	0.0414412	0.115	0.067	1	BRD8	0.781568
IL27RA	0.165723	-0.13635	0.263	0.317	1	IL27RA	0.780617
TNFRSF25	0.166102	0.0344245	0.115	0.067	1	TNFRSF25	0.779626
TSC22D4	0.166339	-0.121545	0.314	0.378	1	TSC22D4	0.779005
TRAM1	0.166507	0.0731682	0.455	0.335	1	TRAM1	0.778567
OASL	0.166598	-0.0990138	0.494	0.573	1	OASL	0.778331
RSU1	0.166736	-0.107758	0.077	0.122	1	RSU1	0.777971
FLI1	0.166901	0.0880222	0.186	0.122	1	FLI1	0.777542
INPP5D	0.167016	0.0991256	0.353	0.262	1	INPP5D	0.777242
FNBP1	0.167342	0.105141	0.609	0.494	1	FNBP1	0.776394
NFU1	0.16739	0.115016	0.147	0.098	1	NFU1	0.776271
S100A4	0.16765	0.177054	0.859	0.762	1	S100A4	0.775597
AL355816.2	0.167901	0.115855	0.103	0.061	1	AL355816.2	0.774946
TRIR	0.16795	-0.129109	0.814	0.799	1	TRIR	0.774821
SF1	0.167989	-0.102537	0.609	0.628	1	SF1	0.77472
PGP	0.167999	0.136591	0.378	0.299	1	PGP	0.774695
PSMA6	0.168125	0.065659	0.141	0.085	1	PSMA6	0.774367
HSPA4	0.168269	0.0645077	0.333	0.25	1	HSPA4	0.773996
NDFIP2	0.16834	0.0528524	0.115	0.067	1	NDFIP2	0.773812
RBM41	0.168542	-0.0760945	0.071	0.116	1	RBM41	0.773293
EEF1AKMT2	0.168599	0.06915	0.122	0.073	1	EEF1AKMT2	0.773146
ARRDC3	0.169438	0.0812322	0.16	0.104	1	ARRDC3	0.770988
LTBP3	0.16948	0.0994355	0.103	0.061	1	LTBP3	0.770882
ARRDC2	0.169603	-0.106491	0.077	0.122	1	ARRDC2	0.770567
RPL36	0.169691	0.0840144	0.994	0.976	1	RPL36	0.770341
VPS26A	0.169762	0.0984951	0.224	0.159	1	VPS26A	0.770158
ATP11B	0.170259	-0.130908	0.122	0.171	1	ATP11B	0.768891
POLE4	0.170538	0.0882498	0.256	0.189	1	POLE4	0.76818
XRRA1	0.17105	-0.111278	0.077	0.122	1	XRRA1	0.766876
ANKRD39	0.171061	0.0696778	0.192	0.128	1	ANKRD39	0.766849
VNN2	0.171173	-0.162833	0.096	0.14	1	VNN2	0.766566
TPRG1	0.171684	0.141561	0.147	0.098	1	TPRG1	0.765269
CARD16	0.171998	0.116071	0.397	0.293	1	CARD16	0.764477
ARMT1	0.172125	-0.135653	0.064	0.104	1	ARMT1	0.764155
SNX14	0.17219	0.0456423	0.224	0.152	1	SNX14	0.763992
CHMP1A	0.172203	0.0723249	0.244	0.171	1	CHMP1A	0.763959
MAX	0.172903	-0.096116	0.128	0.183	1	MAX	0.762199
PPWD1	0.173035	0.151585	0.192	0.134	1	PPWD1	0.761865
MYH9	0.173368	0.0675891	0.75	0.64	1	MYH9	0.76103
LDLRAP1	0.173369	0.116861	0.109	0.067	1	LDLRAP1	0.761028
KLF2	0.174351	0.100592	0.276	0.207	1	KLF2	0.758576
IER3IP1	0.174357	0.0786691	0.314	0.232	1	IER3IP1	0.758561
CCDC47	0.174581	0.105263	0.173	0.122	1	CCDC47	0.758002
TSPAN31	0.174581	-0.126966	0.122	0.171	1	TSPAN31	0.758002
CPOX	0.174587	0.110249	0.135	0.085	1	CPOX	0.757989
TOMM22	0.174625	0.0976793	0.372	0.28	1	TOMM22	0.757893
RBBP4	0.174743	0.101503	0.301	0.232	1	RBBP4	0.757601
OSGEP	0.17475	-0.112019	0.109	0.159	1	OSGEP	0.757583
WDR48	0.174932	0.104296	0.109	0.067	1	WDR48	0.75713
NOL8	0.175302	-0.184837	0.192	0.244	1	NOL8	0.756212
PAN3	0.175719	-0.0977859	0.103	0.152	1	PAN3	0.755182
MEX3C	0.175762	-0.15401	0.103	0.146	1	MEX3C	0.755075
DPP8	0.175835	0.0955529	0.25	0.189	1	DPP8	0.754894
EPRS	0.176002	-0.176489	0.256	0.311	1	EPRS	0.754483
ZNF587	0.176723	0.104555	0.103	0.061	1	ZNF587	0.752708
DECR1	0.177028	-0.163662	0.256	0.305	1	DECR1	0.751959
PRIM2	0.177512	0.0725439	0.122	0.073	1	PRIM2	0.750773
RALGAPB	0.177973	0.122434	0.115	0.073	1	RALGAPB	0.749647
BTF3	0.178063	0.0728457	0.968	0.915	1	BTF3	0.749426
EIF3H	0.178151	0.121263	0.679	0.549	1	EIF3H	0.749211
SAMSN1	0.178538	0.0730458	0.385	0.287	1	SAMSN1	0.74827
AC016831.5	0.178645	0.0985091	0.167	0.116	1	AC016831.5	0.748009
FKBP5	0.178723	-0.11584	0.083	0.128	1	FKBP5	0.747818
TMBIM4	0.178762	-0.10168	0.583	0.622	1	TMBIM4	0.747726
MED16	0.178854	0.103518	0.141	0.091	1	MED16	0.747501
PARP11	0.178886	0.111895	0.109	0.067	1	PARP11	0.747423
CEBPZ	0.178981	0.154354	0.269	0.207	1	CEBPZ	0.747194
YAF2	0.179062	0.143648	0.154	0.104	1	YAF2	0.746996
DDX52	0.179135	-0.155154	0.141	0.189	1	DDX52	0.746819
NFIC	0.179273	-0.155517	0.09	0.134	1	NFIC	0.746486
LPIN2	0.179304	0.0758106	0.41	0.335	1	LPIN2	0.74641
DDX54	0.179399	0.0914656	0.154	0.104	1	DDX54	0.74618
MED17	0.179455	-0.135785	0.083	0.128	1	MED17	0.746045
TRMT10C	0.179577	-0.115549	0.231	0.287	1	TRMT10C	0.745749
ATF1	0.179598	0.113036	0.135	0.085	1	ATF1	0.7457
ILF2	0.179627	-0.130074	0.288	0.348	1	ILF2	0.745628
SLC33A1	0.179794	0.0496378	0.122	0.073	1	SLC33A1	0.745225
TMEM222	0.179929	-0.0802897	0.077	0.122	1	TMEM222	0.744898
RCHY1	0.17994	0.106649	0.167	0.116	1	RCHY1	0.744871
TSN	0.180955	0.0631837	0.199	0.134	1	TSN	0.74243
R3HDM4	0.180996	-0.147214	0.167	0.213	1	R3HDM4	0.742331
MED29	0.181102	0.0953894	0.173	0.116	1	MED29	0.742077
SNRPG	0.181114	-0.113712	0.564	0.561	1	SNRPG	0.742049
DALRD3	0.181327	0.0563014	0.122	0.073	1	DALRD3	0.741536
LYSMD2	0.181402	0.0673856	0.423	0.317	1	LYSMD2	0.741358
GLIPR2	0.181564	-0.097342	0.397	0.457	1	GLIPR2	0.740971
UQCRH	0.181642	0.017554	0.776	0.622	1	UQCRH	0.740784
DMAP1	0.182198	-0.13927	0.096	0.14	1	DMAP1	0.739457
SNRPD3	0.182368	-0.111684	0.519	0.549	1	SNRPD3	0.739052
DMWD	0.182871	0.0361295	0.122	0.073	1	DMWD	0.737856
MTR	0.18297	0.068238	0.167	0.11	1	MTR	0.737619
ANXA11	0.18306	-0.157433	0.468	0.47	1	ANXA11	0.737407
ATG16L2	0.183352	0.0791566	0.103	0.061	1	ATG16L2	0.736714
UBR3	0.18342	-0.103748	0.064	0.104	1	UBR3	0.736554
EPB41	0.183671	0.0845284	0.583	0.476	1	EPB41	0.73596
EFCAB14	0.183697	0.124233	0.25	0.189	1	EFCAB14	0.735898
POLR2D	0.183728	-0.0759503	0.077	0.122	1	POLR2D	0.735824
BRMS1	0.183743	-0.141281	0.199	0.25	1	BRMS1	0.735788
SHISAL2A	0.18395	0.0663929	0.16	0.104	1	SHISAL2A	0.7353
PITPNA	0.184006	0.0963989	0.147	0.098	1	PITPNA	0.735167
CKS2	0.184018	-0.18416	0.141	0.189	1	CKS2	0.73514
TRAPPC1	0.184175	-0.100502	0.622	0.634	1	TRAPPC1	0.73477
GCN1	0.184194	0.0794501	0.103	0.061	1	GCN1	0.734726
LMBRD1	0.184355	0.100429	0.173	0.116	1	LMBRD1	0.734344
HBP1	0.184788	0.063804	0.179	0.122	1	HBP1	0.733327
PSME2	0.184908	0.119262	0.859	0.799	1	PSME2	0.733045
TMED3	0.185191	-0.10765	0.115	0.165	1	TMED3	0.732379
MALSU1	0.185319	0.110092	0.212	0.152	1	MALSU1	0.732081
APOBEC3G	0.185385	-0.105822	0.949	0.939	1	APOBEC3G	0.731926
POLR2F	0.185675	-0.19356	0.295	0.335	1	POLR2F	0.731246
TMX2	0.18568	-0.0926912	0.147	0.201	1	TMX2	0.731236
KRCC1	0.185757	0.0839176	0.25	0.177	1	KRCC1	0.731056
FUBP3	0.185885	0.107895	0.103	0.061	1	FUBP3	0.730756
EDF1	0.185913	0.0721907	0.853	0.805	1	EDF1	0.730689
SDF4	0.185917	0.0757886	0.212	0.152	1	SDF4	0.730682
MAP4K4	0.185971	0.126519	0.218	0.159	1	MAP4K4	0.730556
ZNF655	0.185982	0.0750073	0.378	0.287	1	ZNF655	0.730528
GBP4	0.186157	0.0350939	0.462	0.354	1	GBP4	0.73012
SLC25A1	0.186196	0.083066	0.135	0.085	1	SLC25A1	0.730029
UBE2S	0.186375	0.0861293	0.41	0.311	1	UBE2S	0.729613
PPP2R5A	0.186425	0.0579863	0.212	0.146	1	PPP2R5A	0.729495
UTP11	0.186465	0.0470684	0.147	0.091	1	UTP11	0.729403
SYS1	0.186522	0.0452624	0.173	0.11	1	SYS1	0.729271
CWC15	0.186707	0.104802	0.41	0.329	1	CWC15	0.728839
CASD1	0.186771	0.0446699	0.122	0.073	1	CASD1	0.72869
STK24	0.18717	-0.122843	0.179	0.232	1	STK24	0.727764
HSPA8	0.187523	0.0649611	0.929	0.909	1	HSPA8	0.726946
RGL2	0.187588	0.0834103	0.103	0.061	1	RGL2	0.726795
CCDC107	0.187605	0.107095	0.442	0.348	1	CCDC107	0.726755
ARID4B	0.187911	-0.168801	0.571	0.598	1	ARID4B	0.726047
SPTAN1	0.187946	-0.142081	0.244	0.287	1	SPTAN1	0.725967
TMEM203	0.188144	-0.11308	0.192	0.256	1	TMEM203	0.72551
CAMK2D	0.188177	0.0641585	0.141	0.091	1	CAMK2D	0.725433
FAS	0.188788	0.0979623	0.263	0.195	1	FAS	0.724026
RPL41	0.188858	0.0579756	1	1	1	RPL41	0.723864
FBXL3	0.188909	0.0923256	0.141	0.091	1	FBXL3	0.723747
MCTS1	0.189065	0.0922089	0.263	0.195	1	MCTS1	0.72339
BRWD1	0.189418	-0.0954401	0.192	0.25	1	BRWD1	0.722578
SECISBP2L	0.189449	0.0680571	0.16	0.104	1	SECISBP2L	0.722508
ARL6IP1	0.189497	-0.101916	0.301	0.354	1	ARL6IP1	0.722398
RSBN1L	0.189514	-0.163695	0.385	0.451	1	RSBN1L	0.722358
APOBEC3C	0.189691	-0.0346293	0.564	0.64	1	APOBEC3C	0.721953
LINC00672	0.190164	0.075327	0.103	0.061	1	LINC00672	0.720872
CDC42SE1	0.190254	0.112251	0.462	0.366	1	CDC42SE1	0.720667
GTPBP8	0.190291	0.177673	0.25	0.177	1	GTPBP8	0.720581
MT-ND4	0.190491	0.0616354	1	1	1	MT-ND4	0.720126
CCNL2	0.190567	0.124309	0.301	0.232	1	CCNL2	0.719952
CHD8	0.190732	-0.124252	0.199	0.256	1	CHD8	0.719577
NUMA1	0.190837	0.0862584	0.199	0.14	1	NUMA1	0.719338
GTDC1	0.191028	0.0995306	0.103	0.061	1	GTDC1	0.718902
VAMP8	0.191244	-0.119507	0.692	0.701	1	VAMP8	0.718411
LAPTM5	0.191287	-0.117266	0.808	0.835	1	LAPTM5	0.718315
UCP2	0.191316	0.0895661	0.487	0.378	1	UCP2	0.718248
ERGIC3	0.191356	-0.143498	0.147	0.195	1	ERGIC3	0.718157
APOBEC3F	0.191421	0.123135	0.115	0.073	1	APOBEC3F	0.71801
SEC61A1	0.191491	0.0833527	0.154	0.104	1	SEC61A1	0.717851
TIMM10B	0.191542	-0.168591	0.109	0.152	1	TIMM10B	0.717736
PPP3CC	0.191857	0.0817634	0.141	0.091	1	PPP3CC	0.717022
KRAS	0.192315	0.101844	0.442	0.36	1	KRAS	0.715987
SF3A3	0.192486	0.0935891	0.231	0.165	1	SF3A3	0.715602
BTN3A2	0.192565	-0.174864	0.5	0.512	1	BTN3A2	0.715424
H2AFZ	0.192896	-0.101335	0.769	0.78	1	H2AFZ	0.714676
HECTD1	0.192898	0.0812528	0.218	0.152	1	HECTD1	0.714673
SKAP2	0.192993	0.129372	0.269	0.207	1	SKAP2	0.714459
VEZT	0.193	-0.0946427	0.083	0.128	1	VEZT	0.714443
CRCP	0.193344	0.0805065	0.141	0.091	1	CRCP	0.71367
IFNAR1	0.193695	0.0650899	0.173	0.116	1	IFNAR1	0.712882
TOB2	0.193695	-0.136793	0.122	0.165	1	TOB2	0.712882
SEC23A	0.193783	-0.165745	0.141	0.183	1	SEC23A	0.712685
MIA2	0.193815	0.0779267	0.256	0.183	1	MIA2	0.712612
TMEM50B	0.194372	0.0852879	0.295	0.213	1	TMEM50B	0.711366
TENT5C	0.19439	-0.103611	0.064	0.104	1	TENT5C	0.711326
PHF20	0.194505	-0.170862	0.256	0.305	1	PHF20	0.71107
CYB5R4	0.194511	0.0368314	0.186	0.122	1	CYB5R4	0.711055
ZNF426	0.194515	0.0541304	0.103	0.061	1	ZNF426	0.711047
TMEM223	0.19466	-0.120988	0.212	0.262	1	TMEM223	0.710724
SKA2	0.194808	-0.152891	0.192	0.238	1	SKA2	0.710393
CGRRF1	0.194874	-0.131407	0.083	0.122	1	CGRRF1	0.710247
EIF5	0.194874	-0.172444	0.577	0.555	1	EIF5	0.710246
TNFRSF1B	0.194918	-0.162023	0.288	0.335	1	TNFRSF1B	0.710149
EIF3F	0.194939	0.061624	0.673	0.591	1	EIF3F	0.7101
HERC1	0.195086	0.0690744	0.256	0.189	1	HERC1	0.709774
GMPS	0.19526	0.0790344	0.205	0.146	1	GMPS	0.709386
CNOT8	0.195269	0.0643604	0.128	0.079	1	CNOT8	0.709368
MLF2	0.195353	0.0382722	0.218	0.152	1	MLF2	0.70918
ITGB1	0.195372	-0.191028	0.385	0.421	1	ITGB1	0.709137
LRIF1	0.196118	0.121961	0.256	0.183	1	LRIF1	0.707482
MAD2L1BP	0.196234	0.0696719	0.147	0.098	1	MAD2L1BP	0.707225
PPP1R14B	0.196496	-0.0678951	0.686	0.665	1	PPP1R14B	0.706646
SMU1	0.196566	0.094981	0.224	0.165	1	SMU1	0.706491
CELF1	0.19675	0.075897	0.353	0.268	1	CELF1	0.706086
LINC02273	0.196989	-0.102115	0.064	0.104	1	LINC02273	0.705558
MLLT3	0.19707	-0.172594	0.301	0.348	1	MLLT3	0.705379
NDEL1	0.19716	0.0521387	0.103	0.061	1	NDEL1	0.70518
WDR61	0.197504	-0.128265	0.103	0.146	1	WDR61	0.704424
FABP5	0.19765	-0.164285	0.359	0.402	1	FABP5	0.704103
ISCA1	0.197841	0.0853211	0.199	0.14	1	ISCA1	0.703683
CPSF7	0.197861	-0.0906134	0.064	0.104	1	CPSF7	0.70364
LENG1	0.197995	0.0914834	0.282	0.213	1	LENG1	0.703347
NDUFB6	0.198115	0.121967	0.282	0.22	1	NDUFB6	0.703083
HNRNPH1	0.198165	0.110555	0.577	0.5	1	HNRNPH1	0.702974
NOP14	0.198483	0.151598	0.205	0.152	1	NOP14	0.702277
UBL3	0.198642	-0.175317	0.212	0.256	1	UBL3	0.701929
TRMT2A	0.198736	-0.0866433	0.064	0.104	1	TRMT2A	0.701724
AKAP11	0.198837	0.0833752	0.115	0.073	1	AKAP11	0.701503
PIK3CD	0.19895	0.0937293	0.263	0.201	1	PIK3CD	0.701256
AL133453.1	0.199196	0.0670288	0.179	0.128	1	AL133453.1	0.700719
CLP1	0.199613	-0.0917094	0.064	0.104	1	CLP1	0.699811
PRCC	0.199674	0.0847957	0.115	0.073	1	PRCC	0.699679
NRBF2	0.199767	-0.137215	0.173	0.226	1	NRBF2	0.699476
OCIAD2	0.199816	-0.0999228	0.526	0.561	1	OCIAD2	0.69937
TMEM87A	0.200071	-0.188178	0.179	0.22	1	TMEM87A	0.698816
MEI1	0.200078	-0.120977	0.077	0.116	1	MEI1	0.6988
MED28	0.200294	-0.140118	0.212	0.262	1	MED28	0.698333
OGFR	0.200349	0.064056	0.333	0.25	1	OGFR	0.698213
BUD31	0.200363	0.0713281	0.468	0.378	1	BUD31	0.698183
IFT27	0.200493	-0.077471	0.064	0.104	1	IFT27	0.6979
ELMOD3	0.200712	-0.157026	0.09	0.128	1	ELMOD3	0.697426
RNH1	0.201141	0.0794655	0.474	0.384	1	RNH1	0.6965
WDR11	0.201224	0.071642	0.199	0.134	1	WDR11	0.69632
FAM98C	0.201623	-0.0970836	0.115	0.165	1	FAM98C	0.69546
HLA-DRB1	0.202009	-0.15461	0.846	0.872	1	HLA-DRB1	0.694629
CUL3	0.202179	-0.1747	0.295	0.323	1	CUL3	0.694264
ABRAXAS2	0.202199	0.097021	0.115	0.073	1	ABRAXAS2	0.69422
AES	0.202239	-0.110483	0.718	0.75	1	AES	0.694136
GOLGA1	0.202263	-0.0800272	0.064	0.104	1	GOLGA1	0.694084
MRPL15	0.202264	0.0698707	0.167	0.11	1	MRPL15	0.694081
B4GALT1	0.202363	-0.108038	0.096	0.14	1	B4GALT1	0.69387
RRP36	0.202448	0.0914424	0.301	0.226	1	RRP36	0.693687
SNF8	0.202562	0.105567	0.365	0.28	1	SNF8	0.693443
RAB10	0.202571	-0.150807	0.256	0.287	1	RAB10	0.693422
POGZ	0.202744	0.0594642	0.224	0.152	1	POGZ	0.693053
ITGA4	0.2029	-0.199829	0.333	0.378	1	ITGA4	0.692718
QRICH1	0.202955	-0.108323	0.071	0.11	1	QRICH1	0.692601
TMEM134	0.203076	-0.118055	0.179	0.232	1	TMEM134	0.692342
CDKAL1	0.203136	0.0772614	0.109	0.067	1	CDKAL1	0.692212
RNF146	0.203136	0.0702544	0.109	0.067	1	RNF146	0.692212
ATP5F1C	0.203848	-0.152577	0.404	0.445	1	ATP5F1C	0.690694
THAP6	0.203871	-0.15195	0.09	0.128	1	THAP6	0.690645
PSMG2	0.20443	-0.147252	0.359	0.384	1	PSMG2	0.689455
RASSF2	0.204665	-0.122878	0.077	0.116	1	RASSF2	0.688957
KLHDC3	0.204665	-0.130432	0.077	0.116	1	KLHDC3	0.688957
TPRG1L	0.204683	-0.0984115	0.071	0.11	1	TPRG1L	0.688919
ARL4C	0.205451	0.0841592	0.853	0.793	1	ARL4C	0.687291
PPCS	0.205484	0.0986755	0.314	0.238	1	PPCS	0.687223
CREBZF	0.205594	0.0877351	0.353	0.268	1	CREBZF	0.686989
SLC25A38	0.205658	-0.0800361	0.083	0.128	1	SLC25A38	0.686855
EIF3E	0.205788	0.0852197	0.654	0.591	1	EIF3E	0.686579
ITGA1	0.206156	-0.158723	0.513	0.579	1	ITGA1	0.685803
STK17A	0.206187	-0.0977475	0.865	0.835	1	STK17A	0.685739
RAP1A	0.206338	-0.137339	0.429	0.47	1	RAP1A	0.68542
TMUB2	0.206449	0.121764	0.173	0.122	1	TMUB2	0.685188
PTP4A2	0.206655	-0.0922776	0.712	0.75	1	PTP4A2	0.684754
CASC3	0.207105	0.0738657	0.141	0.091	1	CASC3	0.683809
RAD51C	0.207509	0.0886968	0.147	0.098	1	RAD51C	0.682963
DESI2	0.207548	0.073476	0.109	0.067	1	DESI2	0.68288
CCDC93	0.207638	-0.0529676	0.064	0.104	1	CCDC93	0.682692
POLM	0.20787	0.0552974	0.135	0.085	1	POLM	0.682209
BAZ2A	0.20799	0.0844333	0.256	0.189	1	BAZ2A	0.681957
NDUFA10	0.208004	0.0538824	0.269	0.189	1	NDUFA10	0.681929
GATAD1	0.208196	0.0993097	0.122	0.079	1	GATAD1	0.681527
ADAM17	0.208277	0.0765297	0.147	0.098	1	ADAM17	0.681359
PSIP1	0.208639	-0.127764	0.449	0.488	1	PSIP1	0.680605
C14orf119	0.208867	0.0777159	0.391	0.305	1	C14orf119	0.68013
ERGIC2	0.208897	0.0987272	0.288	0.22	1	ERGIC2	0.680068
CENPT	0.209047	0.0924914	0.147	0.098	1	CENPT	0.679756
TRMT11	0.209284	0.0912504	0.173	0.122	1	TRMT11	0.679264
DFFA	0.209485	0.0431811	0.135	0.085	1	DFFA	0.678847
POLG	0.20988	0.075139	0.122	0.079	1	POLG	0.67803
SYMPK	0.210232	-0.102644	0.103	0.146	1	SYMPK	0.677301
SCAMP1	0.210331	-0.0943821	0.09	0.134	1	SCAMP1	0.677098
SPPL3	0.210548	0.0715266	0.154	0.104	1	SPPL3	0.676648
BDP1	0.210711	-0.190654	0.321	0.36	1	BDP1	0.676314
THOC6	0.210981	0.0616254	0.147	0.098	1	THOC6	0.675757
RXRB	0.211279	-0.0556374	0.064	0.104	1	RXRB	0.675143
TMEM70	0.211285	0.0689739	0.16	0.11	1	TMEM70	0.675131
ADAT1	0.211471	-0.12648	0.077	0.116	1	ADAT1	0.674749
BIN3	0.211573	0.0713515	0.122	0.079	1	BIN3	0.67454
ADRB2	0.211688	0.105861	0.154	0.104	1	ADRB2	0.674304
LSM8	0.211813	0.0407579	0.609	0.47	1	LSM8	0.674047
GALK1	0.212405	0.0552871	0.16	0.11	1	GALK1	0.672836
FAM200B	0.212411	0.0782883	0.199	0.14	1	FAM200B	0.672823
DCUN1D1	0.212442	0.108465	0.141	0.098	1	DCUN1D1	0.672759
ANAPC4	0.212482	0.0750235	0.109	0.067	1	ANAPC4	0.672678
RNF34	0.212954	-0.142393	0.179	0.232	1	RNF34	0.671714
CCPG1	0.213434	-0.174541	0.25	0.293	1	CCPG1	0.670736
LIAS	0.213588	0.0306454	0.103	0.061	1	LIAS	0.670424
PRKAR1A	0.213855	0.0635445	0.314	0.238	1	PRKAR1A	0.669881
DPH5	0.214294	0.0418785	0.115	0.073	1	DPH5	0.66899
SMARCD2	0.214365	0.0551577	0.154	0.104	1	SMARCD2	0.668846
TMEM199	0.214528	0.034859	0.103	0.061	1	TMEM199	0.668515
SBDS	0.214529	-0.201448	0.186	0.226	1	SBDS	0.668515
TTF1	0.2147	-0.132336	0.135	0.183	1	TTF1	0.668168
TM7SF3	0.214934	-0.126745	0.109	0.152	1	TM7SF3	0.667695
SLC25A53	0.214935	-0.114016	0.077	0.116	1	SLC25A53	0.667692
TLK2	0.214996	0.0739616	0.167	0.116	1	TLK2	0.667569
ARSG	0.215178	0.0787894	0.115	0.073	1	ARSG	0.667203
DCAF13	0.215559	-0.119967	0.244	0.293	1	DCAF13	0.666434
TNRC6B	0.215674	0.0599342	0.532	0.457	1	TNRC6B	0.666203
CD44	0.215682	0.117244	0.821	0.689	1	CD44	0.666186
DUSP4	0.215901	0.135642	0.481	0.39	1	DUSP4	0.665746
VAMP7	0.215959	0.0903686	0.128	0.085	1	VAMP7	0.665629
ZNHIT1	0.216061	0.10187	0.442	0.372	1	ZNHIT1	0.665423
RNF41	0.216064	0.066693	0.115	0.073	1	RNF41	0.665418
MED4	0.216138	0.0603434	0.288	0.213	1	MED4	0.665269
LSM2	0.216139	0.118524	0.41	0.323	1	LSM2	0.665267
CBFB	0.2162	0.131798	0.199	0.146	1	CBFB	0.665145
PCBP2	0.216238	-0.102948	0.468	0.512	1	PCBP2	0.665068
DNAJC5	0.216419	0.0378815	0.103	0.061	1	DNAJC5	0.664705
IER2	0.216604	0.159013	0.603	0.512	1	IER2	0.664333
AIMP1	0.216624	0.0650393	0.346	0.256	1	AIMP1	0.664294
XCL1	0.216798	0.0140616	0.128	0.085	1	XCL1	0.663944
RAB5B	0.216814	-0.0930822	0.096	0.14	1	RAB5B	0.663912
ETHE1	0.216845	0.111546	0.154	0.11	1	ETHE1	0.663851
DNAJB1	0.216936	0.0999749	0.218	0.159	1	DNAJB1	0.663668
UBE2Q2	0.216952	0.103808	0.115	0.073	1	UBE2Q2	0.663635
MRPS10	0.217818	0.0835598	0.333	0.256	1	MRPS10	0.661906
MITD1	0.217845	0.0954081	0.314	0.238	1	MITD1	0.661853
TRIM22	0.217893	0.0803634	0.385	0.323	1	TRIM22	0.661756
SLC30A9	0.217982	-0.0902323	0.071	0.11	1	SLC30A9	0.66158
RPL5	0.218036	0.0531793	1	0.994	1	RPL5	0.661471
CCND2	0.218056	0.0137914	0.532	0.402	1	CCND2	0.661433
ZC3H15	0.218057	-0.110631	0.397	0.451	1	ZC3H15	0.66143
DDX6	0.218377	-0.103209	0.487	0.524	1	DDX6	0.660792
PSMC1	0.218436	0.0448106	0.359	0.268	1	PSMC1	0.660676
ZFYVE28	0.218443	0.0694719	0.308	0.232	1	ZFYVE28	0.660662
FMNL3	0.218738	0.0999973	0.115	0.073	1	FMNL3	0.660076
CMTM7	0.218856	-0.129264	0.244	0.287	1	CMTM7	0.659841
CTDSPL2	0.219011	0.0617571	0.154	0.104	1	CTDSPL2	0.659534
CARD11	0.219124	0.0475924	0.179	0.122	1	CARD11	0.65931
ABCD2	0.219634	0.0582492	0.115	0.073	1	ABCD2	0.6583
SFPQ	0.219679	0.0858028	0.583	0.53	1	SFPQ	0.658212
BANP	0.219787	-0.116458	0.09	0.128	1	BANP	0.657998
XPA	0.219822	-0.115152	0.199	0.256	1	XPA	0.657928
LENG8	0.220078	-0.101409	0.186	0.232	1	LENG8	0.657423
AC013264.1	0.220272	0.0261193	0.109	0.067	1	AC013264.1	0.657041
ATP6V1C1	0.220534	0.0659282	0.115	0.073	1	ATP6V1C1	0.656525
WDR3	0.220583	-0.0824058	0.064	0.104	1	WDR3	0.656428
ITGAE	0.220816	0.0976171	0.378	0.299	1	ITGAE	0.65597
CHST11	0.220859	0.0847341	0.231	0.171	1	CHST11	0.655885
FAM214A	0.220937	0.0144866	0.179	0.128	1	FAM214A	0.655732
HTATIP2	0.220951	0.105887	0.263	0.201	1	HTATIP2	0.655704
CD48	0.220985	0.0410347	0.878	0.835	1	CD48	0.655638
STARD3NL	0.221202	0.0537305	0.109	0.067	1	STARD3NL	0.655211
TMA16	0.221363	0.104654	0.135	0.091	1	TMA16	0.654894
FAM160B1	0.221536	-0.0860938	0.154	0.201	1	FAM160B1	0.654555
GBP5	0.222121	0.0554345	0.494	0.396	1	GBP5	0.65341
TOPORS	0.222468	-0.210535	0.199	0.238	1	TOPORS	0.652733
N4BP2L1	0.222865	0.0814502	0.167	0.116	1	N4BP2L1	0.651957
COASY	0.222878	-0.117011	0.077	0.116	1	COASY	0.651932
MAVS	0.223	-0.101607	0.115	0.159	1	MAVS	0.651695
MPHOSPH8	0.223638	-0.150926	0.59	0.622	1	MPHOSPH8	0.650453
TMED4	0.223666	0.121824	0.385	0.311	1	TMED4	0.6504
LSM5	0.223732	0.0646021	0.25	0.183	1	LSM5	0.650272
SRSF7	0.224121	-0.0927077	0.788	0.823	1	SRSF7	0.649518
NCOA1	0.224335	-0.169584	0.192	0.232	1	NCOA1	0.649102
MIS12	0.225286	-0.133623	0.09	0.128	1	MIS12	0.647267
SIAH2	0.225381	0.0741725	0.173	0.122	1	SIAH2	0.647084
GMFG	0.225904	0.0849217	0.904	0.823	1	GMFG	0.646076
STN1	0.225984	0.054941	0.115	0.073	1	STN1	0.645922
TMEM251	0.226398	0.0651767	0.135	0.091	1	TMEM251	0.645128
HIKESHI	0.22663	-0.126853	0.218	0.268	1	HIKESHI	0.644682
ACTR2	0.226727	-0.116237	0.59	0.61	1	ACTR2	0.644497
BIN2	0.226971	0.0816891	0.564	0.47	1	BIN2	0.64403
COL4A3BP	0.227454	0.0547061	0.231	0.171	1	COL4A3BP	0.643107
GSTK1	0.227538	-0.0845635	0.692	0.665	1	GSTK1	0.642946
BROX	0.227744	-0.12784	0.218	0.256	1	BROX	0.642552
MZT2B	0.227769	0.0704154	0.75	0.616	1	MZT2B	0.642505
ENTR1	0.228024	0.106561	0.16	0.116	1	ENTR1	0.64202
RPL18	0.22837	0.0514018	1	1	1	RPL18	0.641361
PSMB3	0.228455	0.0944207	0.744	0.634	1	PSMB3	0.6412
CYFIP2	0.228541	0.0883009	0.34	0.274	1	CYFIP2	0.641036
PUS7L	0.228953	0.129931	0.231	0.177	1	PUS7L	0.640253
IDH3G	0.228985	0.047362	0.295	0.22	1	IDH3G	0.640193
DNAJC21	0.22917	-0.10387	0.288	0.341	1	DNAJC21	0.639842
BTBD6	0.229407	0.0877222	0.237	0.177	1	BTBD6	0.639393
PTMS	0.229415	0.0715235	0.417	0.341	1	PTMS	0.639379
POLR2L	0.22983	-0.133755	0.436	0.488	1	POLR2L	0.638593
TMED7	0.230317	0.0793006	0.141	0.098	1	TMED7	0.637673
UBE2D2	0.23034	0.0825398	0.583	0.506	1	UBE2D2	0.637632
PSMD14	0.231288	0.0382311	0.263	0.189	1	PSMD14	0.635846
ZCCHC8	0.231328	-0.145001	0.122	0.159	1	ZCCHC8	0.635772
SYNCRIP	0.231462	-0.166098	0.244	0.293	1	SYNCRIP	0.63552
PRMT9	0.231531	0.0536361	0.115	0.073	1	PRMT9	0.635391
EFR3A	0.231824	0.0721938	0.288	0.22	1	EFR3A	0.634842
PYM1	0.231869	0.043995	0.186	0.128	1	PYM1	0.634757
ZNF407	0.232168	-0.0931057	0.109	0.152	1	ZNF407	0.634197
TBK1	0.232759	-0.102463	0.199	0.256	1	TBK1	0.633094
GIT2	0.233148	0.116985	0.269	0.213	1	GIT2	0.632369
EOMES	0.23368	-0.191762	0.462	0.463	1	EOMES	0.631378
PTK2B	0.23382	-0.170307	0.192	0.232	1	PTK2B	0.631118
ATP5PO	0.233841	0.040482	0.571	0.439	1	ATP5PO	0.63108
SYNJ2BP	0.234102	-0.0945361	0.096	0.14	1	SYNJ2BP	0.630595
ELMSAN1	0.234117	0.0423519	0.186	0.128	1	ELMSAN1	0.630566
CYTIP	0.2344	0.0500765	0.583	0.47	1	CYTIP	0.630042
FAM208A	0.234465	0.0566744	0.25	0.183	1	FAM208A	0.629922
U2AF1L4	0.234494	0.0964502	0.179	0.134	1	U2AF1L4	0.629869
TMC6	0.234551	-0.106591	0.372	0.409	1	TMC6	0.629762
SHPRH	0.234739	0.0941283	0.25	0.189	1	SHPRH	0.629414
MED23	0.235018	0.0573452	0.154	0.104	1	MED23	0.628898
RGS3	0.235402	0.0682769	0.122	0.079	1	RGS3	0.628189
RPIA	0.235511	-0.111747	0.115	0.159	1	RPIA	0.627989
CRTAM	0.235552	0.10767	0.231	0.171	1	CRTAM	0.627914
ARHGAP45	0.235651	0.0603175	0.558	0.47	1	ARHGAP45	0.627731
CCAR1	0.23579	0.135394	0.244	0.189	1	CCAR1	0.627474
CWC22	0.235865	-0.0899052	0.167	0.22	1	CWC22	0.627337
USF3	0.235932	-0.0983522	0.083	0.122	1	USF3	0.627214
MYO9B	0.236004	0.0561724	0.276	0.207	1	MYO9B	0.627081
RPL37A	0.236402	0.0777849	0.987	0.963	1	RPL37A	0.626348
PRDX5	0.236701	-0.136772	0.596	0.591	1	PRDX5	0.6258
C1D	0.2374	-0.112362	0.25	0.305	1	C1D	0.624519
NPRL2	0.237624	0.0515276	0.167	0.116	1	NPRL2	0.624109
MAP3K5	0.237628	0.100285	0.109	0.073	1	MAP3K5	0.624102
ECD	0.237664	0.0554757	0.128	0.085	1	ECD	0.624037
CAMK4	0.237684	-0.10101	0.256	0.311	1	CAMK4	0.624
PDIA3	0.237889	0.0689894	0.737	0.604	1	PDIA3	0.623626
C12orf65	0.238008	-0.179334	0.256	0.299	1	C12orf65	0.623408
AP3D1	0.238265	0.111892	0.192	0.146	1	AP3D1	0.62294
CREBBP	0.238296	-0.129788	0.179	0.22	1	CREBBP	0.622884
RBBP6	0.238525	-0.131319	0.288	0.329	1	RBBP6	0.622466
USP3	0.238539	0.100515	0.269	0.207	1	USP3	0.622441
SLFN5	0.238694	0.0880607	0.782	0.707	1	SLFN5	0.622159
RALY	0.238753	0.0783444	0.372	0.287	1	RALY	0.622052
CD8B	0.238879	-0.193852	0.731	0.744	1	CD8B	0.621822
EXOSC7	0.239083	0.0953832	0.154	0.11	1	EXOSC7	0.621451
TMED5	0.239113	0.0730484	0.218	0.165	1	TMED5	0.621397
KAT6B	0.239465	0.0841902	0.128	0.085	1	KAT6B	0.620759
MAF1	0.240065	0.0408749	0.397	0.311	1	MAF1	0.619671
MDFIC	0.240139	-0.155351	0.244	0.28	1	MDFIC	0.619537
CHST12	0.240216	0.102835	0.449	0.378	1	CHST12	0.619397
OS9	0.240591	0.101811	0.192	0.14	1	OS9	0.61872
GLRX	0.240622	0.0725406	0.423	0.335	1	GLRX	0.618665
POLR2B	0.240715	-0.0994016	0.256	0.311	1	POLR2B	0.618497
RAB11A	0.240765	-0.111741	0.244	0.28	1	RAB11A	0.618407
EIF4EBP1	0.24132	0.11015	0.218	0.159	1	EIF4EBP1	0.617407
UBE2D1	0.242184	0.0834889	0.128	0.085	1	UBE2D1	0.615855
MIS18BP1	0.24229	-0.0779085	0.25	0.299	1	MIS18BP1	0.615665
SAYSD1	0.243103	0.0757845	0.141	0.098	1	SAYSD1	0.61421
KPNA6	0.243107	0.048927	0.218	0.159	1	KPNA6	0.614202
GFM1	0.243346	-0.068753	0.103	0.146	1	GFM1	0.613776
NAP1L4	0.243637	0.0283398	0.532	0.439	1	NAP1L4	0.613257
GNB1	0.244012	-0.0930053	0.263	0.311	1	GNB1	0.61259
BCAP31	0.244856	-0.0997484	0.391	0.402	1	BCAP31	0.61109
GMCL1	0.244998	-0.112541	0.16	0.201	1	GMCL1	0.610838
ATAD1	0.245254	-0.11998	0.179	0.22	1	ATAD1	0.610383
PARL	0.245344	0.0377901	0.199	0.14	1	PARL	0.610224
TRIM27	0.245345	-0.12331	0.173	0.213	1	TRIM27	0.610223
G6PD	0.245555	0.0748065	0.135	0.091	1	G6PD	0.609852
ELOA	0.24587	0.0659861	0.192	0.14	1	ELOA	0.609295
NUDT5	0.245997	-0.182829	0.321	0.341	1	NUDT5	0.60907
RHOT1	0.246138	0.11787	0.103	0.067	1	RHOT1	0.608821
OAT	0.246138	0.0796395	0.103	0.067	1	OAT	0.608821
PDCD1	0.246388	-0.194517	0.141	0.177	1	PDCD1	0.60838
TOLLIP	0.246595	0.0619674	0.141	0.098	1	TOLLIP	0.608016
DNAAF2	0.247351	0.0646525	0.135	0.091	1	DNAAF2	0.606686
MRPS2	0.247473	0.0815696	0.141	0.098	1	MRPS2	0.606472
MDH1	0.24755	-0.109633	0.385	0.415	1	MDH1	0.606337
EAPP	0.247575	-0.164433	0.301	0.335	1	EAPP	0.606292
SH3BGRL	0.247643	0.0558697	0.513	0.439	1	SH3BGRL	0.606173
NDRG1	0.248187	0.0826354	0.103	0.067	1	NDRG1	0.605222
SNRNP70	0.248192	0.052303	0.404	0.311	1	SNRNP70	0.605212
PRPF18	0.248253	0.0516664	0.135	0.091	1	PRPF18	0.605106
LSM10	0.248849	0.0530677	0.308	0.244	1	LSM10	0.604064
HMGB2	0.249203	0.0394622	0.481	0.378	1	HMGB2	0.603447
TSHZ1	0.24954	0.0336567	0.128	0.085	1	TSHZ1	0.602859
ACLY	0.249609	0.0776274	0.135	0.091	1	ACLY	0.602739
LINS1	0.250034	0.0709024	0.199	0.146	1	LINS1	0.602
LBR	0.250071	-0.109139	0.378	0.421	1	LBR	0.601937
TUBA1B	0.250236	0.0756308	0.468	0.384	1	TUBA1B	0.601651
NDUFS4	0.25056	0.0909059	0.218	0.165	1	NDUFS4	0.601088
NSL1	0.25056	-0.0685613	0.167	0.213	1	NSL1	0.601088
PPTC7	0.251013	-0.0887362	0.09	0.128	1	PPTC7	0.600303
CD74	0.251784	-0.112235	0.859	0.878	1	CD74	0.598972
ATP5MC1	0.25184	-0.0948609	0.314	0.354	1	ATP5MC1	0.598875
KDM1A	0.252231	-0.129788	0.122	0.159	1	KDM1A	0.598202
FBXL5	0.252308	-0.0175007	0.122	0.079	1	FBXL5	0.598069
DIMT1	0.252406	0.0877339	0.109	0.073	1	DIMT1	0.597901
ACAP1	0.25247	0.0257702	0.885	0.811	1	ACAP1	0.59779
AP1S1	0.252775	0.0743017	0.192	0.14	1	AP1S1	0.597266
B4GALT3	0.25306	0.0421105	0.167	0.116	1	B4GALT3	0.596776
CCNY	0.253455	-0.101515	0.135	0.177	1	CCNY	0.596099
PRPF40A	0.253508	-0.0934171	0.474	0.494	1	PRPF40A	0.596009
CEMIP2	0.253978	0.136802	0.288	0.226	1	CEMIP2	0.595204
MTMR6	0.254217	0.0629354	0.128	0.085	1	MTMR6	0.594795
NCBP2-AS2	0.25441	0.0444456	0.173	0.122	1	NCBP2-AS2	0.594465
TNFRSF1A	0.254527	-0.126418	0.263	0.293	1	TNFRSF1A	0.594266
CHFR	0.25458	0.072658	0.141	0.098	1	CHFR	0.594176
TSPO	0.25466	-0.119408	0.679	0.677	1	TSPO	0.59404
SSRP1	0.254723	0.0249981	0.224	0.165	1	SSRP1	0.593931
ZRANB2	0.25545	-0.168021	0.436	0.451	1	ZRANB2	0.592693
COMMD6	0.255514	0.0821233	0.814	0.744	1	COMMD6	0.592584
TCIRG1	0.255572	0.0626139	0.237	0.177	1	TCIRG1	0.592487
DNTTIP1	0.255679	-0.133992	0.077	0.11	1	DNTTIP1	0.592305
PAXX	0.255681	0.0699087	0.641	0.555	1	PAXX	0.592302
SNRPA1	0.256017	0.126992	0.359	0.287	1	SNRPA1	0.591732
DTD1	0.256026	0.0895999	0.212	0.159	1	DTD1	0.591717
PHYKPL	0.256523	0.0601067	0.308	0.238	1	PHYKPL	0.590873
CCDC12	0.256877	0.0803518	0.558	0.433	1	CCDC12	0.590276
AHSA1	0.256969	-0.0916827	0.263	0.317	1	AHSA1	0.590119
MRPL11	0.257045	0.0614987	0.231	0.171	1	MRPL11	0.58999
KIF3B	0.257151	-0.15261	0.083	0.116	1	KIF3B	0.589812
AC004687.1	0.257338	-0.122222	0.59	0.622	1	AC004687.1	0.589496
DAD1	0.257402	0.0293233	0.705	0.585	1	DAD1	0.589388
DGAT1	0.257519	-0.0811696	0.09	0.128	1	DGAT1	0.58919
IMPDH1	0.25765	0.0901205	0.154	0.11	1	IMPDH1	0.588969
S100A11	0.257705	0.119173	0.769	0.665	1	S100A11	0.588877
C1orf122	0.257906	-0.0933952	0.167	0.213	1	C1orf122	0.588538
OGFOD3	0.258127	0.0584918	0.122	0.079	1	OGFOD3	0.588166
UBXN1	0.258304	-0.120428	0.66	0.665	1	UBXN1	0.587868
SLA2	0.258384	0.0297954	0.346	0.262	1	SLA2	0.587735
SEL1L	0.259025	-0.149387	0.147	0.183	1	SEL1L	0.586658
USP24	0.259093	0.0635719	0.141	0.098	1	USP24	0.586544
HAT1	0.259217	0.0324542	0.237	0.171	1	HAT1	0.586337
ACTG1	0.2594	0.065603	0.994	0.976	1	ACTG1	0.586031
LINC00909	0.259537	-0.123611	0.103	0.14	1	LINC00909	0.585801
RPL39L	0.259666	0.0583402	0.103	0.067	1	RPL39L	0.585585
KCTD20	0.259942	-0.109313	0.147	0.189	1	KCTD20	0.585124
NDUFB3	0.260019	0.0546951	0.603	0.476	1	NDUFB3	0.584995
ZKSCAN1	0.260114	-0.127886	0.25	0.287	1	ZKSCAN1	0.584836
RBM28	0.26018	0.0925499	0.186	0.134	1	RBM28	0.584726
PPM1K	0.260688	-0.118881	0.295	0.329	1	PPM1K	0.583879
IQGAP2	0.260722	-0.14935	0.429	0.47	1	IQGAP2	0.583822
PIEZO1	0.260866	0.0422035	0.128	0.085	1	PIEZO1	0.583582
RSBN1	0.260869	-0.0971246	0.186	0.232	1	RSBN1	0.583577
GZMA	0.260934	0.0704773	0.981	0.982	1	GZMA	0.583469
COX7A2L	0.261292	-0.101427	0.487	0.488	1	COX7A2L	0.582874
MRPL55	0.261767	-0.072494	0.179	0.226	1	MRPL55	0.582086
NAA50	0.26178	-0.106731	0.333	0.36	1	NAA50	0.582064
44081	0.261862	-0.0670411	0.942	0.909	1	44081	0.581928
RIOK3	0.261952	0.0712293	0.244	0.177	1	RIOK3	0.581779
SAP18	0.262048	-0.0636144	0.718	0.695	1	SAP18	0.581619
ANKIB1	0.262053	0.0528419	0.135	0.091	1	ANKIB1	0.581611
MAP3K2	0.262498	-0.150782	0.186	0.22	1	MAP3K2	0.580873
ATXN7L3	0.262721	0.0990628	0.115	0.079	1	ATXN7L3	0.580506
METAP2	0.26294	0.0654644	0.288	0.226	1	METAP2	0.580144
CISD3	0.262996	0.0816308	0.256	0.195	1	CISD3	0.580051
AP3M2	0.263002	0.040107	0.147	0.104	1	AP3M2	0.580041
CEP290	0.263176	-0.145986	0.128	0.171	1	CEP290	0.579753
NDUFB4	0.263208	0.0902376	0.519	0.433	1	NDUFB4	0.579701
SAMHD1	0.263346	0.0575982	0.474	0.366	1	SAMHD1	0.579473
EXOSC8	0.263599	-0.109397	0.173	0.213	1	EXOSC8	0.579056
PCBD1	0.263752	0.0488987	0.128	0.085	1	PCBD1	0.578804
HAX1	0.264031	0.0462722	0.359	0.287	1	HAX1	0.578345
GSPT1	0.264396	0.0876765	0.353	0.287	1	GSPT1	0.577744
TRIOBP	0.264547	-0.106745	0.096	0.134	1	TRIOBP	0.577496
CORO7	0.264711	-0.073296	0.147	0.195	1	CORO7	0.577228
GATAD2A	0.264751	0.0713335	0.231	0.171	1	GATAD2A	0.577163
ARL6IP5	0.264777	-0.0820084	0.827	0.799	1	ARL6IP5	0.57712
MED13L	0.265094	-0.123163	0.115	0.152	1	MED13L	0.5766
PPA2	0.265097	0.115351	0.128	0.091	1	PPA2	0.576595
MBTPS1	0.265099	0.056315	0.224	0.165	1	MBTPS1	0.576592
DERL2	0.265191	-0.0894486	0.269	0.323	1	DERL2	0.576441
MTREX	0.265245	0.0336794	0.179	0.128	1	MTREX	0.576353
ZNRD1	0.265356	0.112739	0.429	0.354	1	ZNRD1	0.576171
PYHIN1	0.265391	-0.101622	0.506	0.53	1	PYHIN1	0.576114
KYAT3	0.265426	-0.0957701	0.103	0.14	1	KYAT3	0.576057
HSPB1	0.265703	0.0558652	0.147	0.104	1	HSPB1	0.575603
ZBTB40	0.265812	-0.130763	0.077	0.11	1	ZBTB40	0.575425
RHOF	0.265848	0.0830047	0.532	0.451	1	RHOF	0.575366
NOC3L	0.266416	-0.12927	0.096	0.134	1	NOC3L	0.574439
ZNF280D	0.266608	0.0532237	0.147	0.104	1	ZNF280D	0.574127
DIP2A	0.266982	-0.0782482	0.167	0.22	1	DIP2A	0.573518
UBE3A	0.266992	-0.195484	0.244	0.268	1	UBE3A	0.573502
AC097376.2	0.267155	0.111864	0.122	0.085	1	AC097376.2	0.573236
CRYBG1	0.26726	-0.104179	0.141	0.183	1	CRYBG1	0.573067
ISY1	0.267354	0.104066	0.135	0.098	1	ISY1	0.572913
TMEM245	0.267632	0.0922932	0.167	0.122	1	TMEM245	0.572461
EXOC1	0.267735	-0.139874	0.135	0.171	1	EXOC1	0.572294
CYTOR	0.268546	0.0857614	0.763	0.659	1	CYTOR	0.570981
NASP	0.268646	-0.10246	0.276	0.311	1	NASP	0.57082
JADE1	0.268671	0.0308663	0.135	0.091	1	JADE1	0.570779
FAM50A	0.268744	0.0674825	0.404	0.317	1	FAM50A	0.570662
AC005332.5	0.268862	0.0839736	0.109	0.073	1	AC005332.5	0.57047
ATP13A3	0.268905	-0.0965316	0.077	0.11	1	ATP13A3	0.570401
CKAP2	0.268937	-0.156094	0.199	0.238	1	CKAP2	0.570349
LAMTOR1	0.268947	0.0915464	0.442	0.366	1	LAMTOR1	0.570334
SENP7	0.268961	-0.10676	0.301	0.348	1	SENP7	0.57031
UBA3	0.269135	0.102499	0.122	0.085	1	UBA3	0.57003
MAN1A1	0.269327	0.0733982	0.103	0.067	1	MAN1A1	0.569719
KDM6A	0.269327	0.0619341	0.103	0.067	1	KDM6A	0.569719
WWC3	0.269335	0.0629568	0.147	0.104	1	WWC3	0.569708
UBE2H	0.269405	0.071273	0.179	0.128	1	UBE2H	0.569595
DTNBP1	0.269405	0.0582003	0.179	0.128	1	DTNBP1	0.569595
UBASH3A	0.269739	-0.183495	0.167	0.201	1	UBASH3A	0.569056
GIMAP7	0.270275	0.0479938	0.994	0.963	1	GIMAP7	0.568194
FAM162A	0.270297	0.0528572	0.276	0.213	1	FAM162A	0.568158
CARHSP1	0.270386	-0.149891	0.301	0.335	1	CARHSP1	0.568015
TRMT1	0.270416	0.0647176	0.103	0.067	1	TRMT1	0.567968
MDM4	0.270517	0.0689503	0.41	0.341	1	MDM4	0.567806
RGL4	0.270751	-0.0927934	0.199	0.238	1	RGL4	0.56743
MTCH1	0.270937	-0.116626	0.256	0.293	1	MTCH1	0.567132
NEAT1	0.270967	0.0966803	0.801	0.78	1	NEAT1	0.567084
GOT2	0.270981	-0.114029	0.077	0.11	1	GOT2	0.567061
SEC16A	0.271128	-0.0838929	0.096	0.134	1	SEC16A	0.566825
AC139887.2	0.271508	0.0676089	0.103	0.067	1	AC139887.2	0.566218
FGFR1OP2	0.27154	-0.151174	0.397	0.421	1	FGFR1OP2	0.566166
GABARAPL1	0.27179	0.0105011	0.167	0.116	1	GABARAPL1	0.565766
NDUFB7	0.271807	0.0263378	0.571	0.482	1	NDUFB7	0.565739
EIF3G	0.272054	0.0760693	0.776	0.726	1	EIF3G	0.565345
PGLS	0.272431	-0.0753937	0.346	0.378	1	PGLS	0.564744
RWDD1	0.272521	0.103053	0.462	0.402	1	RWDD1	0.5646
RABL2B	0.272602	0.0822289	0.103	0.067	1	RABL2B	0.564471
MRPL10	0.27266	0.0746942	0.192	0.14	1	MRPL10	0.564378
POP4	0.272918	0.0378618	0.263	0.201	1	POP4	0.563967
SF3B2	0.272935	0.0777698	0.526	0.421	1	SF3B2	0.56394
CTBP1	0.272964	0.068579	0.141	0.098	1	CTBP1	0.563895
HELQ	0.273068	-0.085221	0.077	0.11	1	HELQ	0.56373
AC093323.1	0.273104	-0.113388	0.109	0.146	1	AC093323.1	0.563672
TUBGCP2	0.273357	0.0788101	0.256	0.195	1	TUBGCP2	0.563269
ABHD14B	0.273474	0.0711579	0.199	0.146	1	ABHD14B	0.563084
JUN	0.273511	0.149213	0.609	0.567	1	JUN	0.563024
RAB27A	0.273792	0.0914637	0.583	0.524	1	RAB27A	0.562579
KPNA3	0.273878	0.112975	0.179	0.134	1	KPNA3	0.562443
USP8	0.27404	-0.164675	0.288	0.329	1	USP8	0.562185
FKBP15	0.274128	0.0894976	0.122	0.085	1	FKBP15	0.562047
PUF60	0.274203	-0.115088	0.333	0.372	1	PUF60	0.561929
AGPAT2	0.274328	0.0475956	0.25	0.183	1	AGPAT2	0.561729
BCL7C	0.274611	-0.0846325	0.276	0.317	1	BCL7C	0.561282
FAM217B	0.274783	-0.0952397	0.09	0.128	1	FAM217B	0.56101
TSTA3	0.274878	0.060492	0.288	0.226	1	TSTA3	0.56086
TADA3	0.275199	-0.124633	0.276	0.311	1	TADA3	0.560353
JOSD2	0.275206	0.110516	0.205	0.165	1	JOSD2	0.560342
TPM4	0.275332	0.0988107	0.429	0.348	1	TPM4	0.560144
KPNA1	0.275352	0.0523351	0.103	0.067	1	KPNA1	0.560112
RAB2B	0.275904	0.0624511	0.103	0.067	1	RAB2B	0.559242
ELP2	0.276032	-0.143809	0.179	0.22	1	ELP2	0.559041
SLBP	0.276049	-0.0883216	0.212	0.256	1	SLBP	0.559013
PPHLN1	0.276129	-0.0886212	0.34	0.384	1	PPHLN1	0.558888
ASAH1	0.276153	0.124467	0.173	0.134	1	ASAH1	0.55885
LINC00476	0.276218	-0.105663	0.077	0.11	1	LINC00476	0.558748
FKBP3	0.276264	0.0633279	0.256	0.195	1	FKBP3	0.558676
SCAF4	0.27644	-0.143345	0.122	0.152	1	SCAF4	0.558399
YEATS4	0.276749	-0.077436	0.09	0.128	1	YEATS4	0.557914
CST7	0.27714	0.0634343	0.962	0.945	1	CST7	0.5573
FIP1L1	0.277458	-0.120639	0.224	0.268	1	FIP1L1	0.556803
SRFBP1	0.278084	0.107377	0.218	0.171	1	SRFBP1	0.555824
DHRS4L2	0.27812	0.0602324	0.103	0.067	1	DHRS4L2	0.555767
DDX19A	0.278332	-0.104451	0.077	0.11	1	DDX19A	0.555436
RBM38	0.2784	-0.158098	0.186	0.226	1	RBM38	0.555331
CYB5R3	0.27842	-0.0926438	0.103	0.14	1	CYB5R3	0.5553
CLPX	0.278434	0.126354	0.154	0.116	1	CLPX	0.555277
GADD45A	0.278436	0.0836851	0.109	0.073	1	GADD45A	0.555275
ZBTB44	0.27903	0.100808	0.205	0.159	1	ZBTB44	0.554348
TMEM181	0.279122	0.072217	0.16	0.116	1	TMEM181	0.554206
SND1	0.279514	0.0593796	0.109	0.073	1	SND1	0.553597
CGAS	0.279839	0.0886704	0.199	0.152	1	CGAS	0.553091
EIF1	0.279846	-0.0600701	1	0.994	1	EIF1	0.553081
CEP135	0.280311	-0.100123	0.103	0.14	1	CEP135	0.55236
LRCH4	0.28042	-0.12642	0.173	0.213	1	LRCH4	0.552191
DUSP18	0.280594	0.0660323	0.109	0.073	1	DUSP18	0.551921
CBR1	0.281011	0.0743528	0.173	0.128	1	CBR1	0.551276
PDLIM1	0.281114	-0.0856532	0.071	0.104	1	PDLIM1	0.551118
RAD23A	0.281155	-0.157015	0.365	0.39	1	RAD23A	0.551054
SLC44A2	0.281264	0.0356343	0.135	0.091	1	SLC44A2	0.550885
PDCD6	0.281539	0.107285	0.603	0.488	1	PDCD6	0.550461
FYN	0.281583	0.0765102	0.712	0.604	1	FYN	0.550394
RPL37	0.282544	0.0760178	0.994	0.988	1	RPL37	0.548914
PDCD4	0.282928	-0.0688823	0.66	0.677	1	PDCD4	0.548324
EIF2AK1	0.283162	-0.17043	0.179	0.207	1	EIF2AK1	0.547965
CYBC1	0.283249	0.121676	0.34	0.274	1	CYBC1	0.547832
PFDN6	0.283262	0.11136	0.282	0.226	1	PFDN6	0.547812
SMIM19	0.283286	0.074431	0.314	0.256	1	SMIM19	0.547775
NOC2L	0.28345	-0.104325	0.16	0.201	1	NOC2L	0.547524
ATMIN	0.283555	0.0138821	0.128	0.085	1	ATMIN	0.547362
RAC1	0.283711	-0.137064	0.583	0.616	1	RAC1	0.547123
CMTR1	0.283714	0.0505803	0.103	0.067	1	CMTR1	0.547119
RCSD1	0.283836	0.0958719	0.359	0.287	1	RCSD1	0.546932
GPATCH2	0.284186	-0.0782689	0.109	0.146	1	GPATCH2	0.546398
NARF	0.284328	-0.151138	0.237	0.268	1	NARF	0.54618
SOCS4	0.284546	0.0639518	0.154	0.11	1	SOCS4	0.545847
GPR18	0.284644	0.0495843	0.224	0.171	1	GPR18	0.545698
ZFP36L2	0.284918	-0.0947167	0.814	0.848	1	ZFP36L2	0.54528
ESCO1	0.28494	-0.0888895	0.282	0.323	1	ESCO1	0.545246
TAF15	0.28506	-0.146429	0.263	0.293	1	TAF15	0.545064
ZNF567	0.285147	0.0435041	0.147	0.104	1	ZNF567	0.544931
BRAP	0.28546	-0.110824	0.083	0.116	1	BRAP	0.544455
HSP90AB1	0.286011	-0.0432218	0.827	0.835	1	HSP90AB1	0.543617
CHTOP	0.286012	-0.0837284	0.212	0.25	1	CHTOP	0.543616
ERCC4	0.286368	0.0599686	0.122	0.085	1	ERCC4	0.543075
MUM1	0.286654	-0.0949414	0.115	0.152	1	MUM1	0.542642
DPH3	0.287048	0.0532775	0.147	0.104	1	DPH3	0.542046
ATP5ME	0.287419	0.0474722	0.564	0.463	1	ATP5ME	0.541484
ECI2	0.287625	-0.123885	0.205	0.25	1	ECI2	0.541173
MAGOH	0.288569	-0.0747548	0.423	0.451	1	MAGOH	0.539751
RASGRP1	0.288698	-0.159567	0.468	0.476	1	RASGRP1	0.539557
RPS20	0.289084	0.0510403	0.981	0.957	1	RPS20	0.538975
TMEM165	0.289107	0.0627289	0.359	0.299	1	TMEM165	0.538941
VTI1A	0.2896	-0.0749652	0.122	0.165	1	VTI1A	0.538202
YWHAH	0.289903	0.0975349	0.365	0.299	1	YWHAH	0.537748
ECHS1	0.289991	0.0852867	0.34	0.268	1	ECHS1	0.537616
MCRIP2	0.290015	-0.0713833	0.071	0.104	1	MCRIP2	0.53758
GAK	0.290118	-0.0855517	0.154	0.195	1	GAK	0.537425
COG2	0.290145	0.0509578	0.154	0.11	1	COG2	0.537384
GHITM	0.290231	0.0705329	0.423	0.335	1	GHITM	0.537257
FBRSL1	0.290526	0.0566895	0.103	0.067	1	FBRSL1	0.536814
TSPYL2	0.290526	0.0456751	0.103	0.067	1	TSPYL2	0.536814
REEP5	0.290581	-0.133336	0.705	0.713	1	REEP5	0.536733
ATP5IF1	0.290665	-0.0875523	0.705	0.683	1	ATP5IF1	0.536607
PPFIA1	0.290778	0.0741587	0.128	0.091	1	PPFIA1	0.536439
TMEM131L	0.291141	-0.0741017	0.071	0.104	1	TMEM131L	0.535897
UNK	0.29122	0.0193851	0.135	0.091	1	UNK	0.535779
PPP1R12C	0.291672	0.0416892	0.103	0.067	1	PPP1R12C	0.535105
TAF1B	0.291872	0.0673328	0.16	0.116	1	TAF1B	0.534808
COPB2	0.291969	-0.139215	0.269	0.305	1	COPB2	0.534663
TRAPPC2	0.291995	0.0431638	0.218	0.165	1	TRAPPC2	0.534624
RPS25	0.292127	0.0442399	1	1	1	RPS25	0.534429
MANEA-DT	0.292228	-0.11303	0.096	0.128	1	MANEA-DT	0.534277
LACTB	0.292246	0.0221846	0.103	0.067	1	LACTB	0.534251
PRMT1	0.292313	0.104921	0.423	0.366	1	PRMT1	0.534152
POLR1D	0.292356	0.0680699	0.487	0.427	1	POLR1D	0.534088
SMARCB1	0.292369	0.0562832	0.231	0.171	1	SMARCB1	0.534069
CDC5L	0.292595	0.0894765	0.276	0.226	1	CDC5L	0.533733
PRKCB	0.292947	-0.0900878	0.333	0.372	1	PRKCB	0.533212
EXOSC3	0.293233	0.0670903	0.186	0.14	1	EXOSC3	0.532787
HNRNPA2B1	0.293713	0.035444	0.949	0.915	1	HNRNPA2B1	0.532077
SGF29	0.293784	0.029278	0.109	0.073	1	SGF29	0.531971
DCTD	0.293973	0.0423741	0.103	0.067	1	DCTD	0.531692
SNHG9	0.294731	0.07611	0.122	0.085	1	SNHG9	0.530575
MTDH	0.294938	0.0654009	0.692	0.579	1	MTDH	0.530269
SLC39A7	0.295203	0.011245	0.141	0.098	1	SLC39A7	0.529879
MBD3	0.295221	0.0404659	0.147	0.104	1	MBD3	0.529853
GSTO1	0.295369	0.0386879	0.564	0.476	1	GSTO1	0.529635
NBEAL2	0.296052	-0.0553482	0.115	0.159	1	NBEAL2	0.528633
DCPS	0.296202	0.052892	0.115	0.079	1	DCPS	0.528411
PJA2	0.296366	-0.116449	0.346	0.384	1	PJA2	0.528171
C7orf50	0.29653	0.0906707	0.147	0.11	1	C7orf50	0.527931
ACTL6A	0.296737	-0.0865196	0.103	0.14	1	ACTL6A	0.527629
SLF2	0.296771	0.0302193	0.154	0.11	1	SLF2	0.527579
C19orf70	0.296919	0.0922041	0.487	0.409	1	C19orf70	0.527362
TNFAIP3	0.297004	0.0568796	0.346	0.274	1	TNFAIP3	0.527237
UBR5	0.297167	0.0781866	0.179	0.134	1	UBR5	0.526999
HCLS1	0.297295	0.0391639	0.609	0.494	1	HCLS1	0.526813
PIK3R1	0.297437	0.0758031	0.558	0.47	1	PIK3R1	0.526605
TRIM59	0.297494	-0.0943346	0.109	0.146	1	TRIM59	0.526521
ADPGK	0.29752	0.054426	0.199	0.146	1	ADPGK	0.526485
BZW1	0.297543	0.0832046	0.615	0.524	1	BZW1	0.526451
RTF2	0.297816	0.0891073	0.372	0.317	1	RTF2	0.526052
USP9X	0.298656	-0.0897758	0.16	0.207	1	USP9X	0.524829
ETNK1	0.29876	0.0410639	0.231	0.171	1	ETNK1	0.524678
COX5B	0.298926	0.0719677	0.756	0.652	1	COX5B	0.524436
LYAR	0.298932	0.0635762	0.622	0.567	1	LYAR	0.524428
RC3H2	0.299325	0.0851263	0.218	0.165	1	RC3H2	0.523857
NELFCD	0.299464	0.0692911	0.397	0.317	1	NELFCD	0.523655
GALK2	0.299579	-0.078896	0.096	0.134	1	GALK2	0.523488
CCDC84	0.29964	0.0733071	0.167	0.122	1	CCDC84	0.5234
MAML2	0.299678	0.115332	0.103	0.073	1	MAML2	0.523346
HELLS	0.300079	-0.0612797	0.077	0.11	1	HELLS	0.522765
TIMMDC1	0.300085	0.0351078	0.199	0.146	1	TIMMDC1	0.522755
RNASEH2B	0.300183	0.0718644	0.359	0.287	1	RNASEH2B	0.522614
SPOP	0.300196	0.11976	0.244	0.189	1	SPOP	0.522595
PHC2	0.30038	0.0185046	0.135	0.091	1	PHC2	0.522328
CIAPIN1	0.30095	0.0345424	0.103	0.067	1	CIAPIN1	0.521506
ADH5	0.301158	0.0784045	0.391	0.311	1	ADH5	0.521206
CDCA7	0.301199	-0.143525	0.103	0.134	1	CDCA7	0.521146
PAK2	0.301361	-0.144951	0.532	0.549	1	PAK2	0.520912
CALCOCO1	0.301374	0.0323345	0.199	0.146	1	CALCOCO1	0.520895
SP1	0.30141	-0.130327	0.096	0.128	1	SP1	0.520842
FAM102A	0.30149	-0.113851	0.333	0.36	1	FAM102A	0.520727
MKRN1	0.3016	-0.0847299	0.16	0.201	1	MKRN1	0.520569
CRBN	0.301817	0.0321711	0.282	0.213	1	CRBN	0.520256
PSMB10	0.301963	0.0298207	0.295	0.226	1	PSMB10	0.520046
FBXW7	0.302069	0.0746362	0.179	0.134	1	FBXW7	0.519893
BAZ1B	0.303071	0.0358432	0.372	0.305	1	BAZ1B	0.518456
ZNF83	0.303216	0.0262176	0.141	0.098	1	ZNF83	0.518248
GLRX5	0.303594	0.0684802	0.359	0.287	1	GLRX5	0.517706
MRPS14	0.303999	0.0706075	0.212	0.165	1	MRPS14	0.517127
ASXL1	0.304205	-0.124212	0.192	0.226	1	ASXL1	0.516834
NOTCH1	0.304226	0.068582	0.128	0.091	1	NOTCH1	0.516804
ZNF766	0.304231	0.0784861	0.192	0.146	1	ZNF766	0.516796
NDUFA3	0.304496	0.062745	0.449	0.384	1	NDUFA3	0.516418
PRPF8	0.304527	-0.165139	0.321	0.335	1	PRPF8	0.516374
FBL	0.304605	-0.0819053	0.186	0.232	1	FBL	0.516263
DENR	0.304701	-0.134928	0.205	0.238	1	DENR	0.516126
ADIPOR1	0.304733	-0.0874737	0.083	0.116	1	ADIPOR1	0.516081
SLAMF6	0.304981	-0.105267	0.16	0.201	1	SLAMF6	0.515727
OAZ1	0.305048	-0.0687034	0.994	0.97	1	OAZ1	0.515632
NEDD9	0.305382	-0.16733	0.192	0.232	1	NEDD9	0.515156
ZNF302	0.305409	0.0705393	0.205	0.152	1	ZNF302	0.515118
KBTBD3	0.305552	-0.100966	0.096	0.128	1	KBTBD3	0.514915
KAT5	0.305552	-0.10292	0.096	0.128	1	KAT5	0.514915
CYC1	0.305572	0.0112336	0.282	0.213	1	CYC1	0.514887
SOD1	0.306797	-0.0529045	0.705	0.713	1	SOD1	0.513149
PHB2	0.306846	-0.0950375	0.327	0.36	1	PHB2	0.513079
PSMB1	0.306891	-0.0724853	0.718	0.713	1	PSMB1	0.513016
SMG6	0.307009	0.0943875	0.231	0.183	1	SMG6	0.512849
RBM26	0.3071	-0.0890686	0.276	0.311	1	RBM26	0.51272
EIF3I	0.307196	0.0384931	0.487	0.384	1	EIF3I	0.512584
ORC4	0.307227	0.0725644	0.115	0.079	1	ORC4	0.512541
KMT2E	0.307258	0.0848747	0.647	0.549	1	KMT2E	0.512497
PRPF4B	0.307483	-0.0598939	0.423	0.47	1	PRPF4B	0.512179
VPS26C	0.307578	0.0560938	0.122	0.085	1	VPS26C	0.512044
ELOVL5	0.307699	0.0768253	0.224	0.177	1	ELOVL5	0.511874
FADD	0.307941	0.0417063	0.179	0.128	1	FADD	0.511533
GTF2A2	0.307972	0.0500142	0.481	0.372	1	GTF2A2	0.511489
DOK2	0.308112	0.0777693	0.487	0.409	1	DOK2	0.511291
TBCA	0.309204	0.0242907	0.609	0.494	1	TBCA	0.509755
LRBA	0.309424	-0.13981	0.205	0.238	1	LRBA	0.509446
IER5	0.30958	-0.0190256	0.25	0.189	1	IER5	0.509227
NOB1	0.309623	-0.0961689	0.128	0.165	1	NOB1	0.509167
NDUFB11	0.309857	-0.112111	0.622	0.616	1	NDUFB11	0.508838
PPP1R7	0.310118	0.0631895	0.423	0.329	1	PPP1R7	0.508473
KDELR2	0.310229	-0.0834545	0.327	0.366	1	KDELR2	0.508318
PRR14L	0.310236	-0.096357	0.083	0.116	1	PRR14L	0.508308
SDAD1	0.31034	-0.0838249	0.115	0.152	1	SDAD1	0.508163
INTS8	0.310422	0.0169754	0.103	0.067	1	INTS8	0.508048
BRD7	0.31044	0.0592255	0.333	0.274	1	BRD7	0.508023
CDK6	0.310666	0.0813617	0.237	0.177	1	CDK6	0.507706
ANXA5	0.311042	-0.179099	0.513	0.518	1	ANXA5	0.507181
TMEM183A	0.311091	0.0141671	0.192	0.14	1	TMEM183A	0.507112
PRR5L	0.311374	-0.135121	0.154	0.189	1	PRR5L	0.506718
TSNAX	0.312034	0.0667807	0.179	0.134	1	TSNAX	0.505799
P2RY10	0.312106	0.0999617	0.321	0.268	1	P2RY10	0.505698
HIGD1A	0.312436	-0.108848	0.128	0.165	1	HIGD1A	0.505239
CITED2	0.312447	0.100011	0.269	0.213	1	CITED2	0.505223
MCRIP1	0.312527	-0.11067	0.269	0.305	1	MCRIP1	0.505113
TXN	0.312532	-0.0993683	0.622	0.616	1	TXN	0.505106
LEPROTL1	0.312623	-0.0478259	0.667	0.671	1	LEPROTL1	0.504979
CYHR1	0.312656	-0.124907	0.173	0.207	1	CYHR1	0.504933
ZAP70	0.312857	0.0816974	0.365	0.299	1	ZAP70	0.504654
NDE1	0.312997	-0.0964155	0.122	0.159	1	NDE1	0.50446
LYRM7	0.313456	0.055497	0.173	0.128	1	LYRM7	0.503823
CDK11A	0.313545	-0.126646	0.109	0.14	1	CDK11A	0.503701
GGNBP2	0.313741	0.0348142	0.404	0.317	1	GGNBP2	0.503428
ZNF644	0.313897	0.0836168	0.359	0.305	1	ZNF644	0.503213
RPA2	0.314223	0.0681117	0.333	0.28	1	RPA2	0.502762
LIMS1	0.314284	-0.0428315	0.256	0.299	1	LIMS1	0.502677
CDK9	0.314494	0.0694926	0.199	0.152	1	CDK9	0.502387
TMEM11	0.314556	0.0115773	0.147	0.104	1	TMEM11	0.502302
NFATC2IP	0.315042	0.0811842	0.327	0.256	1	NFATC2IP	0.501632
MTRNR2L12	0.315043	0.098232	0.686	0.573	1	MTRNR2L12	0.50163
CASP2	0.315104	0.0417556	0.115	0.079	1	CASP2	0.501546
GIMAP2	0.315105	-0.117363	0.365	0.415	1	GIMAP2	0.501545
IWS1	0.315294	-0.175333	0.244	0.262	1	IWS1	0.501285
MGST3	0.31541	-0.112042	0.481	0.488	1	MGST3	0.501125
MOB4	0.315499	0.0688848	0.301	0.238	1	MOB4	0.501002
POLR2J3.1	0.31557	0.0974835	0.603	0.53	1	POLR2J3.1	0.500905
POMP	0.315646	0.0416656	0.654	0.567	1	POMP	0.5008
RNASEH1	0.31565	0.083917	0.122	0.091	1	RNASEH1	0.500794
ARPC2	0.315713	-0.0616715	0.987	0.976	1	ARPC2	0.500707
CUL1	0.316252	-0.0944358	0.135	0.171	1	CUL1	0.499967
PRKD3	0.316346	0.0641359	0.122	0.085	1	PRKD3	0.499837
EXOC7	0.316362	-0.0979329	0.192	0.226	1	EXOC7	0.499816
RNF8	0.316542	-0.0934483	0.103	0.134	1	RNF8	0.499569
KATNBL1	0.316634	0.0796306	0.179	0.134	1	KATNBL1	0.499443
KIAA2013	0.316661	0.0589397	0.205	0.152	1	KIAA2013	0.499405
SNRNP200	0.31672	-0.208059	0.34	0.354	1	SNRNP200	0.499325
MICU2	0.316902	0.0927417	0.256	0.201	1	MICU2	0.499075
CRNKL1	0.317152	0.0708732	0.135	0.098	1	CRNKL1	0.498732
TRAPPC6B	0.317208	-0.127861	0.135	0.165	1	TRAPPC6B	0.498656
SH3GLB2	0.317559	-0.130314	0.141	0.171	1	SH3GLB2	0.498176
TAGAP	0.318089	0.0280706	0.231	0.177	1	TAGAP	0.497452
LSM7	0.318101	-0.123716	0.538	0.537	1	LSM7	0.497434
TRIM52	0.318176	-0.115757	0.167	0.201	1	TRIM52	0.497332
SLC6A6	0.318182	0.0643094	0.218	0.165	1	SLC6A6	0.497325
PPP1R11	0.318645	0.0653885	0.263	0.207	1	PPP1R11	0.496693
MMP24OS	0.318923	-0.0595471	0.179	0.226	1	MMP24OS	0.496314
DIDO1	0.319021	0.0864435	0.276	0.213	1	DIDO1	0.496181
TRAPPC6A	0.31904	-0.118199	0.218	0.25	1	TRAPPC6A	0.496155
TNPO1	0.319065	-0.09903	0.128	0.165	1	TNPO1	0.49612
PUM2	0.31935	0.0545643	0.199	0.146	1	PUM2	0.495733
VOPP1	0.319801	0.0484565	0.276	0.213	1	VOPP1	0.495121
GDI2	0.319836	-0.107299	0.263	0.293	1	GDI2	0.495073
WRAP73	0.319966	0.0723436	0.141	0.104	1	WRAP73	0.494897
SCAND1	0.320115	-0.116815	0.462	0.482	1	SCAND1	0.494694
MT1X	0.320226	-0.0794678	0.263	0.305	1	MT1X	0.494544
XPC	0.320228	0.0693142	0.263	0.207	1	XPC	0.494541
DHX29	0.320547	0.0938297	0.218	0.177	1	DHX29	0.494108
PDPK1	0.32058	-0.0912678	0.09	0.122	1	PDPK1	0.494064
COMMD10	0.320791	0.0587933	0.122	0.085	1	COMMD10	0.493778
AGFG2	0.320791	0.0503256	0.122	0.085	1	AGFG2	0.493778
AKAP17A	0.320885	0.0457599	0.218	0.171	1	AKAP17A	0.49365
CD96	0.320905	0.0367696	0.615	0.537	1	CD96	0.493623
IK	0.320976	-0.107418	0.494	0.506	1	IK	0.493527
EPHA1-AS1	0.321101	0.0641422	0.192	0.146	1	EPHA1-AS1	0.493358
ATIC	0.321254	0.0411932	0.154	0.11	1	ATIC	0.493151
KARS	0.321307	0.0570117	0.186	0.14	1	KARS	0.49308
NUP37	0.321476	0.0492741	0.16	0.116	1	NUP37	0.492851
HLA-A	0.321581	-0.0412339	1	1	1	HLA-A	0.49271
LAMTOR2	0.321622	0.0678093	0.378	0.305	1	LAMTOR2	0.492654
HLA-DQA1	0.32165	-0.143448	0.429	0.457	1	HLA-DQA1	0.492617
MYO9A	0.32196	0.0351844	0.115	0.079	1	MYO9A	0.492198
NUP54	0.322006	-0.151804	0.154	0.183	1	NUP54	0.492136
RTCB	0.322395	0.0410541	0.256	0.195	1	RTCB	0.491611
TMEM161A	0.322536	0.0251991	0.115	0.079	1	TMEM161A	0.491422
CFLAR	0.322723	0.065267	0.647	0.585	1	CFLAR	0.49117
ELMO1	0.322724	-0.110535	0.109	0.14	1	ELMO1	0.491169
COMMD8	0.322789	0.0415646	0.34	0.262	1	COMMD8	0.491082
USP14	0.3228	0.0891216	0.25	0.201	1	USP14	0.491067
NEDD8	0.32285	-0.0939778	0.686	0.677	1	NEDD8	0.490999
AL359220.1	0.323339	-0.158905	0.173	0.207	1	AL359220.1	0.490342
TMEM106B	0.323771	-0.101126	0.173	0.207	1	TMEM106B	0.489762
SLC39A10	0.324207	-0.196738	0.218	0.25	1	SLC39A10	0.489177
JAK1	0.324759	0.0674062	0.801	0.695	1	JAK1	0.488439
WDR46	0.32515	0.013453	0.205	0.146	1	WDR46	0.487917
HOXB2	0.325277	0.0664381	0.122	0.085	1	HOXB2	0.487747
TCF25	0.325364	-0.0732129	0.481	0.506	1	TCF25	0.48763
CDC14A	0.326037	0.0705451	0.218	0.171	1	CDC14A	0.486733
SMAD3	0.326187	0.0345528	0.135	0.098	1	SMAD3	0.486533
PSMB8	0.326286	0.0730341	0.865	0.793	1	PSMB8	0.486401
BRD2	0.326667	0.0945648	0.442	0.384	1	BRD2	0.485894
PGAM1	0.326997	0.100417	0.474	0.409	1	PGAM1	0.485457
SNX27	0.327747	0.0423726	0.115	0.079	1	SNX27	0.484461
BAG5	0.327834	0.0796131	0.237	0.189	1	BAG5	0.484346
RRS1	0.327898	-0.115566	0.109	0.14	1	RRS1	0.484261
HIST1H1E	0.328114	0.0941034	0.212	0.171	1	HIST1H1E	0.483975
ZFYVE27	0.328285	-0.0592835	0.083	0.116	1	ZFYVE27	0.483749
PYCR2	0.328638	0.0400226	0.173	0.128	1	PYCR2	0.483283
SIKE1	0.328753	0.0684099	0.199	0.152	1	SIKE1	0.48313
PABPC1	0.328994	0.0871468	0.705	0.604	1	PABPC1	0.482812
ETF1	0.32902	0.0917235	0.179	0.14	1	ETF1	0.482778
CBX4	0.329171	-0.116019	0.128	0.159	1	CBX4	0.482578
ZBP1	0.329424	-0.140405	0.122	0.152	1	ZBP1	0.482245
SF3B3	0.329794	-0.113755	0.212	0.244	1	SF3B3	0.481757
AKAP8L	0.329979	-0.0782773	0.16	0.195	1	AKAP8L	0.481514
ROCK1	0.330144	0.0626395	0.583	0.482	1	ROCK1	0.481297
PHB	0.330626	0.071555	0.417	0.329	1	PHB	0.480663
SRRM2	0.330946	-0.0878959	0.705	0.689	1	SRRM2	0.480243
[truncated: 2,878 more rows]

## Sheet: S1D-C1 PD-1 vs. Bispecific
Table S1D: Differential Expression of Cluster 1 CD8 T cells PD-1 vs. Bispecific
	p_val	avg_logFC	pct.1	pct.2	p_val_adj	Gene_ID	logP
POLR2B	4.73547e-05	-0.370306	0.256	0.471	0.95647	POLR2B	4.32464
ZNF24	0.000633103	-0.33538	0.212	0.365	1	ZNF24	3.19853
ATP6V1F	0.000822764	-0.269596	0.372	0.565	1	ATP6V1F	3.08472
ZNF224	0.000824082	-0.313029	0.205	0.359	1	ZNF224	3.08403
PPP3CA	0.000833795	0.236487	0.237	0.1	1	PPP3CA	3.07894
CDK11A	0.000995316	-0.27639	0.109	0.247	1	CDK11A	3.00204
NSFL1C	0.00103851	0.252961	0.186	0.065	1	NSFL1C	2.98359
EED	0.00114858	-0.286139	0.128	0.265	1	EED	2.93984
AC245297.3	0.00118257	0.323819	0.635	0.471	1	AC245297.3	2.92717
KEAP1	0.001248	0.255282	0.16	0.053	1	KEAP1	2.90378
ZYX	0.00156655	0.288662	0.263	0.129	1	ZYX	2.80506
RHOG	0.00165546	-0.232768	0.288	0.441	1	RHOG	2.78108
GABARAPL2	0.00212638	0.249648	0.647	0.512	1	GABARAPL2	2.67236
POLR2J3.1	0.00218795	0.224992	0.603	0.441	1	POLR2J3.1	2.65996
RPS6KA5	0.00245292	-0.255223	0.064	0.176	1	RPS6KA5	2.61032
MARF1	0.00253344	0.215324	0.154	0.053	1	MARF1	2.59629
PDLIM2	0.00275458	-0.292293	0.314	0.453	1	PDLIM2	2.55994
DIS3	0.00306141	0.212684	0.244	0.112	1	DIS3	2.51408
CCNL2	0.00320149	0.26857	0.301	0.165	1	CCNL2	2.49465
UQCC3	0.00326763	-0.226447	0.115	0.241	1	UQCC3	2.48577
MCPH1	0.00326958	0.243501	0.212	0.094	1	MCPH1	2.48551
MRPL12	0.00334234	0.257122	0.244	0.124	1	MRPL12	2.47595
FKBP2	0.00418187	0.25786	0.596	0.471	1	FKBP2	2.37863
ZNF638	0.00456815	-0.213323	0.25	0.394	1	ZNF638	2.34026
FXR1	0.00458304	-0.302962	0.237	0.371	1	FXR1	2.33885
SBDS	0.00463937	-0.286716	0.186	0.312	1	SBDS	2.33354
USP20	0.0047409	0.164655	0.109	0.029	1	USP20	2.32414
FZR1	0.0047409	0.164533	0.109	0.029	1	FZR1	2.32414
NSMAF	0.00480621	-0.190665	0.045	0.135	1	NSMAF	2.3182
DCAF11	0.00487831	0.249316	0.179	0.076	1	DCAF11	2.31173
DTX3L	0.00617309	0.205765	0.327	0.182	1	DTX3L	2.2095
RAD9A	0.0062269	-0.203202	0.083	0.188	1	RAD9A	2.20573
SSH2	0.00624514	-0.246169	0.109	0.224	1	SSH2	2.20446
SS18L2	0.00630572	-0.229742	0.397	0.518	1	SS18L2	2.20027
SLC41A3	0.00639357	0.171875	0.122	0.041	1	SLC41A3	2.19426
RPF2	0.00647324	-0.135757	0.032	0.112	1	RPF2	2.18888
RANBP6	0.00659031	0.185065	0.122	0.041	1	RANBP6	2.18109
NT5C3A	0.00660115	0.16573	0.224	0.106	1	NT5C3A	2.18038
RSU1	0.00700132	-0.187753	0.077	0.176	1	RSU1	2.15482
FAM78A	0.00706357	-0.204085	0.147	0.271	1	FAM78A	2.15098
CCNT1	0.00707927	-0.18553	0.045	0.129	1	CCNT1	2.15001
EHBP1	0.00707956	-0.178757	0.038	0.118	1	EHBP1	2.14999
ORMDL2	0.00711522	0.254398	0.462	0.318	1	ORMDL2	2.14781
CNOT6	0.00738808	-0.175992	0.058	0.147	1	CNOT6	2.13147
SNRNP25	0.00767844	0.146372	0.179	0.076	1	SNRNP25	2.11473
PSMD5	0.00777415	-0.192471	0.032	0.106	1	PSMD5	2.10935
MTFR1L	0.00827775	0.162568	0.109	0.035	1	MTFR1L	2.08209
AP1G2	0.00840134	-0.210233	0.083	0.176	1	AP1G2	2.07565
TMEM33	0.00847754	0.2374	0.154	0.065	1	TMEM33	2.07173
HMGN2	0.00903498	-0.184981	0.487	0.6	1	HMGN2	2.04407
XPNPEP1	0.00911247	-0.17237	0.071	0.165	1	XPNPEP1	2.04036
COMMD7	0.00934756	-0.2448	0.288	0.429	1	COMMD7	2.0293
CYB561A3	0.00939717	-0.175624	0.045	0.124	1	CYB561A3	2.027
RBM17	0.0102849	-0.219088	0.205	0.329	1	RBM17	1.9878
MCM3	0.0103328	-0.22256	0.083	0.176	1	MCM3	1.98578
DMAP1	0.0103705	-0.197348	0.096	0.194	1	DMAP1	1.9842
G3BP2	0.0103714	-0.199409	0.404	0.553	1	G3BP2	1.98416
METTL26	0.0108579	-0.244286	0.372	0.482	1	METTL26	1.96426
TRIM23	0.0108635	0.175841	0.154	0.065	1	TRIM23	1.96403
AL365361.1	0.0108833	-0.187916	0.045	0.124	1	AL365361.1	1.96324
SRSF4	0.01104	0.252678	0.545	0.412	1	SRSF4	1.95703
PCYOX1	0.0110419	-0.186299	0.064	0.153	1	PCYOX1	1.95696
DCAF16	0.0111118	-0.163347	0.045	0.124	1	DCAF16	1.95422
RPS29	0.0111134	-0.0852432	0.994	1	1	RPS29	1.95415
AKAP7	0.0111889	-0.126908	0.045	0.124	1	AKAP7	1.95121
MSC	0.0115055	-0.18682	0.096	0.194	1	MSC	1.9391
C9orf78	0.0116944	-0.226665	0.468	0.588	1	C9orf78	1.93202
44085	0.0117437	-0.190266	0.064	0.153	1	44085	1.93019
ANKRD49	0.0117784	0.210903	0.295	0.176	1	ANKRD49	1.92891
COMT	0.0118881	0.168387	0.365	0.235	1	COMT	1.92489
TNRC6A	0.0119159	-0.252365	0.115	0.212	1	TNRC6A	1.92387
NFATC2IP	0.0120818	0.246274	0.327	0.206	1	NFATC2IP	1.91787
SMC3	0.0121029	-0.207257	0.417	0.535	1	SMC3	1.91711
RNF13	0.0121408	-0.23155	0.135	0.241	1	RNF13	1.91575
SLC50A1	0.0122721	-0.190066	0.051	0.129	1	SLC50A1	1.91108
FBXW2	0.0123461	0.184621	0.192	0.094	1	FBXW2	1.90847
SKP1	0.0123881	-0.164104	0.756	0.806	1	SKP1	1.907
URI1	0.0124081	-0.161961	0.25	0.394	1	URI1	1.9063
SLC25A38	0.0124378	-0.215438	0.083	0.176	1	SLC25A38	1.90526
TIMM23B	0.0125794	0.170021	0.103	0.035	1	TIMM23B	1.90034
KLHDC3	0.012614	-0.225903	0.077	0.165	1	KLHDC3	1.89915
CSNK1A1	0.0126864	-0.161695	0.462	0.571	1	CSNK1A1	1.89666
MYO5A	0.012769	-0.222826	0.051	0.129	1	MYO5A	1.89384
RBBP5	0.0130241	-0.181162	0.051	0.129	1	RBBP5	1.88525
AC004951.1	0.0130635	-0.167456	0.038	0.112	1	AC004951.1	1.88394
CALHM2	0.0134592	-0.191972	0.051	0.129	1	CALHM2	1.87098
TSPAN3	0.0135164	-0.179834	0.071	0.159	1	TSPAN3	1.86914
MCM3AP	0.0140909	0.137957	0.122	0.047	1	MCM3AP	1.85106
NFATC2	0.0146679	0.146283	0.442	0.288	1	NFATC2	1.83363
CALCOCO1	0.0147992	0.156802	0.199	0.1	1	CALCOCO1	1.82976
MRPS35	0.0150034	-0.164588	0.103	0.2	1	MRPS35	1.82381
KAT8	0.0150364	-0.174582	0.051	0.129	1	KAT8	1.82286
LINC00672	0.0154174	0.15023	0.103	0.035	1	LINC00672	1.81199
CCND3	0.0154427	0.243554	0.474	0.353	1	CCND3	1.81128
NAA10	0.0156639	0.231788	0.378	0.259	1	NAA10	1.8051
ESCO1	0.0157082	-0.174257	0.282	0.412	1	ESCO1	1.80387
PSAP	0.0159498	0.204986	0.256	0.147	1	PSAP	1.79724
MBD5	0.0160033	-0.204401	0.205	0.318	1	MBD5	1.79579
OGFOD3	0.0161408	0.159992	0.122	0.047	1	OGFOD3	1.79207
CEP78	0.0161703	-0.185411	0.109	0.212	1	CEP78	1.79128
TPP2	0.0162082	-0.215831	0.141	0.241	1	TPP2	1.79026
VPS4A	0.0163469	-0.217173	0.109	0.206	1	VPS4A	1.78656
CD70	0.016376	0.101905	0.173	0.082	1	CD70	1.78579
DNAJC10	0.0165402	0.191159	0.224	0.124	1	DNAJC10	1.78146
RPL23	0.0166719	0.134932	0.897	0.853	1	RPL23	1.77802
GORASP2	0.0167679	-0.151771	0.071	0.159	1	GORASP2	1.77552
LBR	0.0170593	-0.177692	0.378	0.529	1	LBR	1.76804
GSDMD	0.0173314	-0.213866	0.385	0.494	1	GSDMD	1.76117
SBNO1	0.0173912	-0.203041	0.244	0.359	1	SBNO1	1.75967
NFKBID	0.017591	-0.156821	0.064	0.147	1	NFKBID	1.75471
DPP3	0.0178144	0.161859	0.109	0.041	1	DPP3	1.74923
AUP1	0.0183802	0.187935	0.269	0.165	1	AUP1	1.73565
GSTO1	0.0185674	0.179735	0.564	0.435	1	GSTO1	1.73125
GTF3C2	0.0188406	0.166785	0.109	0.041	1	GTF3C2	1.7249
ESD	0.0191199	0.175049	0.359	0.235	1	ESD	1.71852
VPS13A	0.0192178	-0.218848	0.173	0.271	1	VPS13A	1.7163
SELENOO	0.0193729	0.158405	0.109	0.041	1	SELENOO	1.71281
LMNB1	0.0196283	-0.190533	0.051	0.124	1	LMNB1	1.70712
GNAI2	0.0200053	0.204899	0.737	0.665	1	GNAI2	1.69885
DLGAP1-AS1	0.0200996	0.209217	0.212	0.118	1	DLGAP1-AS1	1.69681
ODF2L	0.020196	0.203827	0.5	0.371	1	ODF2L	1.69473
C12orf43	0.020495	0.137399	0.135	0.059	1	C12orf43	1.68835
MAP3K7	0.02052	-0.167176	0.051	0.124	1	MAP3K7	1.68782
SRSF2	0.0205466	-0.185821	0.494	0.606	1	SRSF2	1.68726
CYSTM1	0.0207961	-0.187377	0.115	0.206	1	CYSTM1	1.68202
REL	0.0209937	-0.220229	0.263	0.382	1	REL	1.67791
USP39	0.0213098	0.155838	0.115	0.047	1	USP39	1.67142
FNIP1	0.0214275	-0.170359	0.083	0.165	1	FNIP1	1.66903
SPPL2A	0.0216164	-0.227246	0.205	0.312	1	SPPL2A	1.66522
TRPM7	0.0216939	0.225535	0.224	0.135	1	TRPM7	1.66366
TUBD1	0.0217181	-0.149827	0.051	0.124	1	TUBD1	1.66318
VAMP3	0.0218549	-0.160349	0.051	0.124	1	VAMP3	1.66045
CARHSP1	0.0220352	-0.220692	0.301	0.412	1	CARHSP1	1.65688
C1orf43	0.0221253	-0.157626	0.199	0.324	1	C1orf43	1.65511
ATP6AP2	0.0221675	0.168104	0.487	0.353	1	ATP6AP2	1.65428
THAP6	0.0224049	-0.170519	0.09	0.171	1	THAP6	1.64966
EIF4E2	0.0224168	-0.165489	0.192	0.3	1	EIF4E2	1.64943
ZNF672	0.0229437	-0.165405	0.071	0.147	1	ZNF672	1.63934
ELMO2	0.0232137	0.131946	0.115	0.047	1	ELMO2	1.63425
IPO7	0.023247	-0.15945	0.135	0.235	1	IPO7	1.63363
DHPS	0.0232785	-0.195061	0.224	0.318	1	DHPS	1.63304
DPY30	0.0235527	0.198605	0.41	0.294	1	DPY30	1.62796
CDR2	0.0239085	-0.141984	0.064	0.141	1	CDR2	1.62145
VPS72	0.0239844	0.13871	0.115	0.047	1	VPS72	1.62007
FAM118A	0.0241093	-0.211546	0.474	0.582	1	FAM118A	1.61782
AGTRAP	0.024234	-0.169993	0.083	0.165	1	AGTRAP	1.61557
CSNK2A2	0.0243089	0.151806	0.205	0.112	1	CSNK2A2	1.61423
RAB10	0.0243196	-0.208345	0.256	0.335	1	RAB10	1.61404
RNF149	0.0243381	0.134944	0.34	0.218	1	RNF149	1.61371
ACSF3	0.024403	0.129748	0.141	0.065	1	ACSF3	1.61256
SPSB3	0.0245456	-0.219051	0.192	0.294	1	SPSB3	1.61003
ANKRD36C	0.0247651	-0.161644	0.141	0.247	1	ANKRD36C	1.60616
AP2A1	0.0252338	-0.20324	0.051	0.118	1	AP2A1	1.59802
PAPOLG	0.0252999	0.193526	0.128	0.059	1	PAPOLG	1.59688
PIGX	0.0256826	0.194426	0.154	0.076	1	PIGX	1.59036
CFAP97	0.0257697	-0.156162	0.147	0.247	1	CFAP97	1.58889
CRYZL1	0.0257921	-0.14799	0.058	0.129	1	CRYZL1	1.58851
FAM207A	0.0259512	0.163268	0.173	0.088	1	FAM207A	1.58584
WDR45B	0.0260022	-0.11704	0.051	0.124	1	WDR45B	1.58499
MBD6	0.0261771	-0.149484	0.045	0.112	1	MBD6	1.58208
JADE1	0.0263413	-0.208853	0.135	0.224	1	JADE1	1.57936
TNRC6C	0.0266332	0.145826	0.244	0.141	1	TNRC6C	1.57458
OTUD5	0.0266917	-0.139564	0.071	0.147	1	OTUD5	1.57362
IFI27L2	0.0269071	-0.194972	0.327	0.435	1	IFI27L2	1.57013
SAR1B	0.0270421	0.171512	0.327	0.218	1	SAR1B	1.56796
FAM122A	0.0271074	0.141562	0.122	0.053	1	FAM122A	1.56691
PDZD11	0.0273707	-0.133035	0.141	0.241	1	PDZD11	1.56271
MZT1	0.0277859	0.185517	0.212	0.124	1	MZT1	1.55618
PQLC3	0.0281783	0.161973	0.263	0.159	1	PQLC3	1.55009
GRWD1	0.0281966	0.127729	0.141	0.065	1	GRWD1	1.5498
RPL13A	0.0284577	0.0821333	1	1	1	RPL13A	1.5458
PRPF39	0.0285128	-0.15455	0.077	0.153	1	PRPF39	1.54496
RPS25	0.0289292	0.0807703	1	1	1	RPS25	1.53866
STX7	0.0289364	0.171951	0.186	0.1	1	STX7	1.53856
ALG13	0.0290188	-0.142539	0.154	0.265	1	ALG13	1.53732
WAC-AS1	0.0290453	-0.222526	0.128	0.212	1	WAC-AS1	1.53692
GNL1	0.0291265	-0.191552	0.083	0.159	1	GNL1	1.53571
BCL11B	0.0291413	0.193982	0.506	0.382	1	BCL11B	1.53549
CERS2	0.0293805	0.227949	0.224	0.135	1	CERS2	1.53194
ALG8	0.0294744	-0.149718	0.071	0.147	1	ALG8	1.53055
AGL	0.0304176	-0.137716	0.058	0.129	1	AGL	1.51687
MTERF4	0.0304337	0.176466	0.372	0.247	1	MTERF4	1.51665
WDR59	0.0304661	0.11991	0.122	0.053	1	WDR59	1.51618
C16orf54	0.0305486	0.164298	0.333	0.224	1	C16orf54	1.51501
FAM160B1	0.0305641	-0.137432	0.154	0.247	1	FAM160B1	1.51479
HAPLN3	0.0307021	0.120809	0.103	0.041	1	HAPLN3	1.51283
IER3IP1	0.0307801	0.204002	0.314	0.212	1	IER3IP1	1.51173
FASTKD2	0.0311321	0.150001	0.167	0.088	1	FASTKD2	1.50679
HNRNPR	0.0311654	-0.228182	0.468	0.559	1	HNRNPR	1.50633
PPIE	0.0311899	0.143841	0.25	0.153	1	PPIE	1.50599
IRAK1	0.0312581	0.184191	0.205	0.118	1	IRAK1	1.50504
SPAST	0.031308	0.190886	0.109	0.047	1	SPAST	1.50435
AKT3	0.0315556	0.140067	0.128	0.059	1	AKT3	1.50092
NDUFA4	0.0323015	-0.144516	0.776	0.806	1	NDUFA4	1.49078
EXOC3	0.032425	0.136153	0.154	0.076	1	EXOC3	1.48912
HIST1H1D	0.0324371	-0.220426	0.301	0.412	1	HIST1H1D	1.48896
UBE3A	0.0331523	-0.215245	0.244	0.335	1	UBE3A	1.47949
CELF1	0.0332483	0.208431	0.353	0.247	1	CELF1	1.47823
GNL3	0.0332677	-0.19609	0.103	0.182	1	GNL3	1.47798
NSL1	0.0332913	-0.160853	0.167	0.259	1	NSL1	1.47767
TSR2	0.0334193	0.151938	0.205	0.118	1	TSR2	1.476
C1orf52	0.0335729	-0.176596	0.115	0.2	1	C1orf52	1.47401
DDX24	0.0337188	0.15678	0.712	0.629	1	DDX24	1.47213
RETREG1	0.0341315	0.122601	0.103	0.041	1	RETREG1	1.46685
SRPK2	0.0342283	-0.206059	0.269	0.371	1	SRPK2	1.46561
MLF2	0.034749	0.168276	0.218	0.129	1	MLF2	1.45906
TNFRSF1B	0.0347956	-0.201637	0.288	0.382	1	TNFRSF1B	1.45848
FAM208B	0.0352907	-0.112494	0.122	0.218	1	FAM208B	1.45234
CNOT6L	0.0354043	-0.201954	0.378	0.494	1	CNOT6L	1.45094
PSMA4	0.0357559	0.138964	0.577	0.441	1	PSMA4	1.44665
SRBD1	0.0358502	0.0994232	0.122	0.053	1	SRBD1	1.44551
LAMP1	0.0360282	0.171837	0.301	0.194	1	LAMP1	1.44336
RYR1	0.0364637	-0.165271	0.071	0.141	1	RYR1	1.43814
GTF2E2	0.0364925	-0.142591	0.09	0.171	1	GTF2E2	1.4378
ZNF75A	0.036703	-0.213878	0.25	0.341	1	ZNF75A	1.4353
SNHG12	0.036735	0.140314	0.282	0.176	1	SNHG12	1.43492
KPNA2	0.036794	-0.152879	0.109	0.194	1	KPNA2	1.43422
NDE1	0.0368297	-0.171081	0.122	0.206	1	NDE1	1.4338
PTTG1	0.0368982	-0.216946	0.25	0.335	1	PTTG1	1.43299
TBCA	0.0369555	0.150835	0.609	0.5	1	TBCA	1.43232
ZNF33A	0.0369759	-0.156693	0.167	0.265	1	ZNF33A	1.43208
SNRPB	0.0378017	0.121098	0.699	0.612	1	SNRPB	1.42249
CBLL1	0.0379309	-0.187116	0.083	0.153	1	CBLL1	1.42101
RNF166	0.0379317	-0.16296	0.34	0.453	1	RNF166	1.421
NPM1	0.0380026	-0.125893	0.936	0.924	1	NPM1	1.42019
ID3	0.0382329	-0.436266	0.09	0.165	1	ID3	1.41756
ZC3HAV1	0.0382628	0.160161	0.372	0.271	1	ZC3HAV1	1.41722
ZNF518A	0.0386972	0.133983	0.173	0.094	1	ZNF518A	1.41232
ESF1	0.0388063	-0.190727	0.192	0.294	1	ESF1	1.4111
PRKAR2A	0.038993	-0.140513	0.115	0.2	1	PRKAR2A	1.40901
RNF40	0.0389994	-0.123494	0.064	0.135	1	RNF40	1.40894
INTS4	0.0395133	-0.128769	0.045	0.106	1	INTS4	1.40326
PRMT1	0.0395629	0.204815	0.423	0.341	1	PRMT1	1.40271
BIRC6	0.0396208	0.134775	0.353	0.241	1	BIRC6	1.40208
TSPAN14	0.0398666	0.16503	0.429	0.324	1	TSPAN14	1.39939
MCMBP	0.0398802	-0.121222	0.058	0.124	1	MCMBP	1.39924
ZNF12	0.0400806	0.131253	0.179	0.1	1	ZNF12	1.39707
RABGAP1	0.0401073	-0.129282	0.058	0.124	1	RABGAP1	1.39678
MRPL35	0.0401958	-0.119126	0.083	0.159	1	MRPL35	1.39582
CMPK1	0.0402137	0.13932	0.449	0.318	1	CMPK1	1.39563
LMAN1	0.0402273	0.14247	0.385	0.259	1	LMAN1	1.39548
NSUN5	0.0402419	0.175831	0.25	0.159	1	NSUN5	1.39532
RPL28	0.0405029	0.0610096	1	1	1	RPL28	1.39251
ZNF708	0.0405182	0.204207	0.244	0.159	1	ZNF708	1.39235
MALSU1	0.0406004	0.176015	0.212	0.129	1	MALSU1	1.39147
RNH1	0.0409045	0.14875	0.474	0.376	1	RNH1	1.38823
ACAD8	0.0409599	0.125075	0.115	0.053	1	ACAD8	1.38764
IDH1	0.0415095	0.112821	0.109	0.047	1	IDH1	1.38185
ADAP1	0.0415372	-0.15998	0.096	0.171	1	ADAP1	1.38156
TIMM17B	0.0416837	-0.165073	0.179	0.276	1	TIMM17B	1.38003
PHF11	0.0417453	0.158139	0.442	0.324	1	PHF11	1.37939
ALDH9A1	0.0420615	0.144421	0.282	0.188	1	ALDH9A1	1.37612
CCDC22	0.0421128	0.13217	0.141	0.071	1	CCDC22	1.37559
IST1	0.0421451	0.153154	0.231	0.141	1	IST1	1.37525
CNDP2	0.0423962	-0.11019	0.141	0.235	1	CNDP2	1.37267
BBIP1	0.0426266	-0.138046	0.115	0.2	1	BBIP1	1.37032
ABCF2.1	0.0426828	-0.159948	0.064	0.129	1	ABCF2.1	1.36975
PINX1.1	0.0428	-0.0929171	0.045	0.106	1	PINX1.1	1.36856
AAK1	0.0431459	-0.165462	0.481	0.588	1	AAK1	1.36506
CIAPIN1	0.0431681	-0.1816	0.103	0.176	1	CIAPIN1	1.36484
TPI1	0.0442126	0.181116	0.647	0.535	1	TPI1	1.35445
DYRK1A	0.0442855	0.155458	0.205	0.124	1	DYRK1A	1.35374
ZNF37A	0.0443406	0.187789	0.224	0.141	1	ZNF37A	1.3532
SF3B5	0.0445146	-0.165253	0.481	0.571	1	SF3B5	1.3515
UBR2	0.0445268	-0.0987941	0.179	0.282	1	UBR2	1.35138
TCF12	0.044825	-0.161003	0.064	0.129	1	TCF12	1.34848
HENMT1	0.0448684	-0.17176	0.122	0.2	1	HENMT1	1.34806
EIF4G3	0.0452062	-0.1817	0.109	0.188	1	EIF4G3	1.3448
COG4	0.0452382	-0.126728	0.077	0.147	1	COG4	1.34449
GFI1	0.0453997	-0.126057	0.096	0.176	1	GFI1	1.34295
KIF3B	0.04545	-0.190302	0.083	0.153	1	KIF3B	1.34247
SPPL3	0.0457105	0.138872	0.154	0.082	1	SPPL3	1.33998
LENG1	0.0457184	0.166628	0.282	0.188	1	LENG1	1.33991
CAPNS1	0.0458672	0.165265	0.468	0.353	1	CAPNS1	1.3385
DUSP4	0.045875	0.214089	0.481	0.359	1	DUSP4	1.33842
NUDCD3	0.0460918	0.176964	0.173	0.1	1	NUDCD3	1.33638
RAB5IF	0.046304	0.163644	0.378	0.271	1	RAB5IF	1.33438
ACAA2	0.0465722	0.138742	0.301	0.2	1	ACAA2	1.33187
ZNF217	0.0471275	-0.228437	0.224	0.312	1	ZNF217	1.32673
PSMG2	0.047199	-0.180377	0.359	0.435	1	PSMG2	1.32607
CUX1	0.0474781	0.153469	0.128	0.065	1	CUX1	1.32351
TMEM222	0.047583	-0.117164	0.077	0.147	1	TMEM222	1.32255
FAM214A	0.0477793	0.177845	0.179	0.106	1	FAM214A	1.32076
MRPL3	0.0477968	0.157682	0.237	0.153	1	MRPL3	1.3206
EML4	0.0483914	0.129275	0.609	0.506	1	EML4	1.31523
RPS6	0.0487975	0.0888153	0.994	1	1	RPS6	1.3116
LDHA	0.0488108	0.195798	0.859	0.824	1	LDHA	1.31148
BAK1	0.0491023	-0.116401	0.147	0.241	1	BAK1	1.3089
MOB4	0.0491041	0.145814	0.301	0.2	1	MOB4	1.30888
CCDC115	0.0493087	0.127115	0.212	0.124	1	CCDC115	1.30708
GLIPR1	0.049309	-0.1634	0.397	0.488	1	GLIPR1	1.30707
BCL9L	0.0495376	0.162195	0.263	0.171	1	BCL9L	1.30507
ATP9B	0.0499115	-0.119371	0.064	0.129	1	ATP9B	1.3018
RPS17	0.0505202	0.164169	0.231	0.147	1	RPS17	1.29653
UBE2L6	0.050522	-0.096063	0.397	0.518	1	UBE2L6	1.29652
EIF2D	0.0506296	-0.153072	0.058	0.118	1	EIF2D	1.2956
ATXN2L	0.050648	-0.107909	0.115	0.2	1	ATXN2L	1.29544
KDELR2	0.0507374	-0.195309	0.327	0.424	1	KDELR2	1.29467
APBA3	0.0509427	0.138861	0.128	0.065	1	APBA3	1.29292
PLEKHF1	0.0509751	0.101444	0.449	0.341	1	PLEKHF1	1.29264
CBX7	0.0510881	0.210095	0.237	0.159	1	CBX7	1.29168
PRPS1	0.051271	-0.143309	0.103	0.176	1	PRPS1	1.29013
USF3	0.0513805	-0.143688	0.083	0.153	1	USF3	1.2892
ASCC2	0.0515238	-0.152289	0.09	0.159	1	ASCC2	1.28799
ASXL1	0.0517036	-0.197333	0.192	0.271	1	ASXL1	1.28648
ZNF106	0.0517149	0.10364	0.256	0.165	1	ZNF106	1.28638
CRELD2	0.0518048	-0.161936	0.179	0.265	1	CRELD2	1.28563
KCTD7	0.0523305	0.144061	0.128	0.065	1	KCTD7	1.28125
CCDC97	0.0524901	0.132694	0.173	0.1	1	CCDC97	1.27992
SP110	0.0527207	0.162325	0.487	0.365	1	SP110	1.27802
DNAJC21	0.0528759	-0.137305	0.288	0.4	1	DNAJC21	1.27674
CELF2	0.0529099	0.158562	0.641	0.535	1	CELF2	1.27646
SAMD3	0.0533493	-0.136436	0.474	0.588	1	SAMD3	1.27287
SELENOS	0.0533688	0.143006	0.391	0.288	1	SELENOS	1.27271
NDUFB8	0.0534575	-0.137896	0.538	0.624	1	NDUFB8	1.27199
ARL8A	0.0537559	-0.168061	0.103	0.176	1	ARL8A	1.26957
TRG-AS1	0.053809	-0.235429	0.288	0.376	1	TRG-AS1	1.26915
SCAF8	0.0539537	0.131014	0.173	0.1	1	SCAF8	1.26798
IL12RB1	0.0544467	-0.0881533	0.109	0.188	1	IL12RB1	1.26403
YBX1	0.0545296	-0.167756	0.788	0.824	1	YBX1	1.26337
ZNHIT6	0.0546133	0.155955	0.186	0.112	1	ZNHIT6	1.2627
ARID5A	0.0547809	0.160598	0.359	0.271	1	ARID5A	1.26137
XAF1	0.0548298	-0.176283	0.308	0.424	1	XAF1	1.26098
DCAF5	0.054974	0.173806	0.179	0.106	1	DCAF5	1.25984
RALB	0.0550742	0.170362	0.115	0.059	1	RALB	1.25905
ACAA1	0.0550823	0.149774	0.333	0.235	1	ACAA1	1.25899
SDAD1	0.0552867	-0.127771	0.115	0.2	1	SDAD1	1.25738
UQCC2	0.0553083	-0.195955	0.212	0.288	1	UQCC2	1.25721
ZNF655	0.0553808	0.164199	0.378	0.276	1	ZNF655	1.25664
ING4	0.0553997	0.140043	0.154	0.082	1	ING4	1.25649
R3HDM4	0.0556167	-0.197103	0.167	0.247	1	R3HDM4	1.25479
TRIM52	0.0557344	-0.150679	0.167	0.253	1	TRIM52	1.25388
H3F3A	0.055859	-0.104579	0.974	0.988	1	H3F3A	1.25291
MBD4	0.0562292	0.177263	0.282	0.194	1	MBD4	1.25004
FRMD4B	0.0566816	-0.161337	0.077	0.141	1	FRMD4B	1.24656
AC016831.7	0.0569326	-0.165955	0.103	0.171	1	AC016831.7	1.24464
LNPEP	0.0570196	-0.147731	0.321	0.406	1	LNPEP	1.24398
PINK1	0.0570278	0.136617	0.103	0.047	1	PINK1	1.24391
TFG	0.0571155	0.118297	0.199	0.118	1	TFG	1.24325
CLK4	0.0574019	0.178118	0.301	0.206	1	CLK4	1.24107
ATG3	0.0575642	-0.137433	0.154	0.235	1	ATG3	1.23985
GPR137B	0.0575907	0.103887	0.128	0.065	1	GPR137B	1.23965
AKTIP	0.0577645	-0.158998	0.231	0.329	1	AKTIP	1.23834
PSMB7	0.057854	-0.209529	0.295	0.388	1	PSMB7	1.23767
U2SURP	0.0578564	-0.127342	0.397	0.488	1	U2SURP	1.23765
MAP3K5	0.05802	0.138835	0.109	0.053	1	MAP3K5	1.23642
HSP90AA1	0.0580581	-0.0719474	0.929	0.953	1	HSP90AA1	1.23614
TMED2	0.0586989	0.158752	0.391	0.276	1	TMED2	1.23137
LMAN2	0.0587724	0.100739	0.59	0.482	1	LMAN2	1.23083
USP22	0.0587983	-0.160225	0.09	0.153	1	USP22	1.23064
ITGA5	0.0591479	0.159081	0.147	0.082	1	ITGA5	1.22806
TIMM8B	0.0591817	0.174164	0.327	0.235	1	TIMM8B	1.22781
EIF4A1	0.0594071	-0.104746	0.231	0.318	1	EIF4A1	1.22616
TMEM8A	0.0596206	0.185085	0.154	0.088	1	TMEM8A	1.2246
C17orf67	0.0597386	-0.113917	0.071	0.135	1	C17orf67	1.22374
PSPC1	0.0597883	-0.102184	0.103	0.182	1	PSPC1	1.22338
UBA6	0.0600454	0.159795	0.288	0.194	1	UBA6	1.22152
NPAT	0.0601803	-0.180731	0.135	0.206	1	NPAT	1.22055
DUSP18	0.0603786	0.131192	0.109	0.053	1	DUSP18	1.21912
STOML2	0.0604474	-0.22879	0.269	0.335	1	STOML2	1.21862
MED16	0.060493	0.121067	0.141	0.076	1	MED16	1.21829
MIB1	0.0605021	0.0933316	0.103	0.047	1	MIB1	1.21823
TSTA3	0.0606906	0.142129	0.288	0.194	1	TSTA3	1.21688
RASA3	0.0611457	0.184492	0.173	0.106	1	RASA3	1.21363
LSM1	0.0611665	0.146133	0.34	0.247	1	LSM1	1.21349
ERH	0.0612253	-0.109817	0.506	0.582	1	ERH	1.21307
ESYT2	0.06124	-0.144445	0.051	0.106	1	ESYT2	1.21296
RPUSD3	0.06129	0.124823	0.154	0.082	1	RPUSD3	1.21261
FOXO3	0.0615306	0.168819	0.122	0.065	1	FOXO3	1.21091
KDM5B	0.0615735	0.195476	0.167	0.1	1	KDM5B	1.21061
FAM107B	0.0616984	-0.189933	0.558	0.624	1	FAM107B	1.20973
CDKAL1	0.0617617	0.129086	0.109	0.053	1	CDKAL1	1.20928
TAF7	0.0619559	0.164179	0.519	0.441	1	TAF7	1.20792
KIAA1468	0.0623102	-0.107192	0.058	0.118	1	KIAA1468	1.20544
ARRB2	0.0623781	0.178234	0.365	0.282	1	ARRB2	1.20497
DESI2	0.062494	-0.122109	0.109	0.182	1	DESI2	1.20416
PACS1	0.0631966	0.146681	0.205	0.129	1	PACS1	1.19931
STAG2	0.0632197	0.105189	0.436	0.306	1	STAG2	1.19915
TPM1	0.063249	0.123059	0.135	0.071	1	TPM1	1.19895
CEP295	0.0637062	-0.107866	0.051	0.106	1	CEP295	1.19582
MTF2	0.0637662	-0.148935	0.167	0.253	1	MTF2	1.19541
ARHGEF1	0.0638348	0.145445	0.603	0.494	1	ARHGEF1	1.19494
DENND1B	0.0641134	-0.144794	0.141	0.218	1	DENND1B	1.19305
CYTH4	0.064228	0.104934	0.333	0.218	1	CYTH4	1.19228
SERINC1	0.0646188	0.125025	0.224	0.141	1	SERINC1	1.18964
SNRPA1	0.0646772	0.176467	0.359	0.259	1	SNRPA1	1.18925
COG2	0.0648827	0.089873	0.154	0.082	1	COG2	1.18787
RHOT2	0.0650606	0.158963	0.218	0.141	1	RHOT2	1.18668
RSRP1	0.0652147	-0.129745	0.609	0.712	1	RSRP1	1.18565
MRPL48	0.0652286	-0.125632	0.109	0.182	1	MRPL48	1.18556
GTF2H3	0.065292	0.134482	0.115	0.059	1	GTF2H3	1.18514
NSD1	0.0655026	-0.106421	0.391	0.488	1	NSD1	1.18374
SHOC2	0.0655551	-0.182536	0.128	0.2	1	SHOC2	1.18339
PIH1D1	0.0656977	0.167413	0.237	0.159	1	PIH1D1	1.18245
CRTAM	0.0658232	-0.251312	0.231	0.318	1	CRTAM	1.18162
RNF44	0.0659234	-0.163924	0.096	0.159	1	RNF44	1.18096
WBP11	0.065933	0.114943	0.327	0.229	1	WBP11	1.1809
PGLS	0.0659376	-0.136664	0.346	0.435	1	PGLS	1.18087
KLF3	0.0659627	-0.164167	0.083	0.147	1	KLF3	1.1807
INPP4B	0.0660781	0.194363	0.346	0.247	1	INPP4B	1.17994
ARHGEF6	0.0661499	-0.164336	0.135	0.206	1	ARHGEF6	1.17947
MRFAP1L1	0.0662981	0.150848	0.288	0.2	1	MRFAP1L1	1.1785
PEX16	0.0663222	-0.134342	0.154	0.235	1	PEX16	1.17834
CAPG	0.0664952	-0.147613	0.16	0.241	1	CAPG	1.17721
CAMLG	0.0665745	-0.168683	0.276	0.365	1	CAMLG	1.17669
NDUFV1	0.0666263	-0.17535	0.128	0.2	1	NDUFV1	1.17635
DUSP16	0.0669139	-0.156068	0.077	0.141	1	DUSP16	1.17448
BOD1	0.066997	-0.11278	0.051	0.106	1	BOD1	1.17394
DCAF8	0.0671407	-0.084822	0.058	0.118	1	DCAF8	1.17301
RASSF5	0.0671526	-0.139377	0.295	0.394	1	RASSF5	1.17294
BTG3	0.0672371	0.150237	0.192	0.118	1	BTG3	1.17239
ACAT1	0.067634	0.137602	0.122	0.065	1	ACAT1	1.16984
MRGBP	0.0678791	0.0949459	0.167	0.094	1	MRGBP	1.16826
NME6	0.0679783	0.125618	0.147	0.082	1	NME6	1.16763
TRIM4	0.0680592	-0.166619	0.128	0.194	1	TRIM4	1.16711
PTTG1IP	0.0680611	-0.115948	0.109	0.182	1	PTTG1IP	1.1671
KDM7A	0.0681738	0.138435	0.179	0.106	1	KDM7A	1.16638
JAKMIP1	0.0683622	-0.132159	0.147	0.229	1	JAKMIP1	1.16518
MIEF1	0.0684963	0.154258	0.128	0.071	1	MIEF1	1.16433
TMEM80	0.0686981	0.152625	0.122	0.065	1	TMEM80	1.16306
FAM219B	0.0687186	0.0990446	0.141	0.076	1	FAM219B	1.16293
CDCA4	0.0693877	0.0946422	0.141	0.076	1	CDCA4	1.15872
IQGAP1	0.0695476	-0.136822	0.538	0.641	1	IQGAP1	1.15772
ST8SIA4	0.069601	0.147374	0.333	0.235	1	ST8SIA4	1.15738
MMADHC	0.0697804	0.145734	0.301	0.218	1	MMADHC	1.15627
MRPL19	0.0698427	0.155575	0.288	0.2	1	MRPL19	1.15588
TMEM187	0.0700385	-0.116568	0.051	0.106	1	TMEM187	1.15466
INIP	0.0701978	-0.108869	0.077	0.141	1	INIP	1.15368
TM2D3	0.0703654	0.14474	0.218	0.141	1	TM2D3	1.15264
RLIM	0.0713096	-0.128433	0.071	0.129	1	RLIM	1.14685
ATRAID	0.0713337	-0.120587	0.359	0.459	1	ATRAID	1.14671
SLC25A42	0.0716011	-0.111981	0.051	0.106	1	SLC25A42	1.14508
CAMK2D	0.0717717	0.101295	0.141	0.076	1	CAMK2D	1.14405
CEBPD	0.0721177	0.10517	0.141	0.076	1	CEBPD	1.14196
SAMD4B	0.0725994	-0.13126	0.096	0.165	1	SAMD4B	1.13907
ATRX	0.0726266	-0.165307	0.596	0.671	1	ATRX	1.1389
GNB2	0.0726493	0.166611	0.391	0.288	1	GNB2	1.13877
GLUL	0.0729918	0.0735499	0.109	0.053	1	GLUL	1.13673
RUFY1	0.0731034	0.149201	0.212	0.141	1	RUFY1	1.13606
PLEC	0.0731824	0.177736	0.224	0.159	1	PLEC	1.13559
PRDX1	0.0733168	0.113005	0.705	0.6	1	PRDX1	1.1348
SDHB	0.073482	0.152483	0.199	0.129	1	SDHB	1.13382
GRB2	0.0735278	0.141989	0.494	0.4	1	GRB2	1.13355
SEC62	0.0737761	0.16943	0.551	0.465	1	SEC62	1.13208
PDE12	0.0738064	0.102613	0.16	0.094	1	PDE12	1.13191
DHFR	0.0740393	-0.118514	0.058	0.112	1	DHFR	1.13054
RPL29	0.0741523	0.0729501	1	1	1	RPL29	1.12988
MPHOSPH10	0.0743816	-0.132366	0.212	0.3	1	MPHOSPH10	1.12853
SLC25A6	0.074584	-0.166648	0.737	0.771	1	SLC25A6	1.12735
RAB29	0.0748946	0.175174	0.365	0.259	1	RAB29	1.12555
DOCK10	0.0751291	-0.157071	0.237	0.324	1	DOCK10	1.12419
GPKOW	0.0752758	-0.13799	0.071	0.129	1	GPKOW	1.12334
TIMM17A	0.0755517	0.117567	0.212	0.129	1	TIMM17A	1.12176
AMDHD2	0.0757261	0.144998	0.141	0.082	1	AMDHD2	1.12075
ATP5F1C	0.0758438	-0.196466	0.404	0.482	1	ATP5F1C	1.12008
SUMO4	0.0766552	0.135897	0.173	0.106	1	SUMO4	1.11546
TIMM50	0.0769288	0.113382	0.122	0.065	1	TIMM50	1.11391
RAB22A	0.0769526	-0.157478	0.179	0.259	1	RAB22A	1.11378
NCOA1	0.0769574	-0.182726	0.192	0.265	1	NCOA1	1.11375
POLR2J	0.0770975	-0.196673	0.404	0.465	1	POLR2J	1.11296
THUMPD3	0.0771374	-0.109129	0.071	0.129	1	THUMPD3	1.11274
CBR1	0.0776399	0.116106	0.173	0.106	1	CBR1	1.10991
RNF126	0.0777705	0.131371	0.224	0.141	1	RNF126	1.10919
CD38	0.0780404	-0.213613	0.167	0.235	1	CD38	1.10768
TGFBR3	0.0780414	-0.124905	0.058	0.112	1	TGFBR3	1.10767
DCAF10	0.0781935	0.127642	0.16	0.094	1	DCAF10	1.10683
IK	0.0784903	-0.125045	0.494	0.576	1	IK	1.10518
SYNCRIP	0.0785029	-0.141315	0.244	0.335	1	SYNCRIP	1.10511
MYO9B	0.0785696	0.124721	0.276	0.188	1	MYO9B	1.10475
RIF1	0.079342	-0.17042	0.288	0.382	1	RIF1	1.1005
ARSG	0.0794831	0.105515	0.115	0.059	1	ARSG	1.09972
OTUD4	0.0795453	-0.194107	0.109	0.176	1	OTUD4	1.09939
DNMT1	0.0796548	-0.165344	0.327	0.412	1	DNMT1	1.09879
TMEM102	0.0796829	-0.148516	0.083	0.141	1	TMEM102	1.09864
MEF2A	0.0800815	-0.132179	0.077	0.135	1	MEF2A	1.09647
RB1	0.0804195	0.104731	0.147	0.082	1	RB1	1.09464
NCSTN	0.0805261	-0.120427	0.058	0.112	1	NCSTN	1.09406
GPATCH2	0.0805414	-0.131714	0.109	0.176	1	GPATCH2	1.09398
TAF15	0.0805739	-0.167996	0.263	0.347	1	TAF15	1.09381
RRP7A	0.080726	0.130534	0.269	0.182	1	RRP7A	1.09299
UBAC2	0.0809871	0.142374	0.308	0.224	1	UBAC2	1.09158
CTCF	0.0810103	0.157869	0.372	0.282	1	CTCF	1.09146
PELP1	0.0812145	0.127764	0.109	0.059	1	PELP1	1.09037
ITPKB	0.0816692	-0.12865	0.09	0.153	1	ITPKB	1.08794
CCL4	0.0817696	-0.143657	0.782	0.824	1	CCL4	1.08741
GDI2	0.0818304	-0.133385	0.263	0.347	1	GDI2	1.08709
TMEM230	0.0818515	0.119234	0.519	0.412	1	TMEM230	1.08697
SAFB	0.0819905	-0.125003	0.276	0.359	1	SAFB	1.08624
MAX	0.0819939	-0.0866618	0.128	0.206	1	MAX	1.08622
TLE4	0.0820572	0.161534	0.212	0.141	1	TLE4	1.08588
LY75	0.082077	0.168311	0.109	0.059	1	LY75	1.08578
AC004687.1	0.0821576	-0.191347	0.59	0.653	1	AC004687.1	1.08535
SKAP2	0.0825809	0.148844	0.269	0.188	1	SKAP2	1.08312
MYL6	0.0829333	0.0978276	0.994	0.994	1	MYL6	1.08127
WBP2	0.0832182	-0.152298	0.199	0.271	1	WBP2	1.07978
ESRRA	0.0832436	0.120089	0.186	0.118	1	ESRRA	1.07965
SLC25A39	0.0833156	0.139376	0.212	0.141	1	SLC25A39	1.07927
NIN	0.0836374	-0.167433	0.321	0.406	1	NIN	1.0776
FAM98B	0.0837831	0.0871815	0.154	0.088	1	FAM98B	1.07684
PUM3	0.0840494	-0.191278	0.109	0.171	1	PUM3	1.07547
CHERP	0.0841377	-0.13313	0.071	0.124	1	CHERP	1.07501
TBCE	0.0842335	-0.115848	0.09	0.153	1	TBCE	1.07452
EMG1	0.0843951	-0.131741	0.141	0.212	1	EMG1	1.07368
DDA1	0.0844064	-0.127676	0.122	0.188	1	DDA1	1.07362
DNAAF2	0.0844788	0.124608	0.135	0.076	1	DNAAF2	1.07325
SHMT2	0.0845629	0.107326	0.103	0.053	1	SHMT2	1.07282
MEI1	0.084718	-0.125595	0.077	0.135	1	MEI1	1.07202
LINC00987	0.0853246	-0.142497	0.109	0.176	1	LINC00987	1.06893
SMAD2	0.0857333	0.108497	0.237	0.159	1	SMAD2	1.06685
PARP8	0.0860117	-0.159556	0.308	0.394	1	PARP8	1.06544
GTF2A1	0.0860888	0.121678	0.135	0.076	1	GTF2A1	1.06505
SERPINB9	0.0862571	-0.138337	0.269	0.359	1	SERPINB9	1.0642
NF2	0.0865013	0.134956	0.109	0.059	1	NF2	1.06298
TGFBR2	0.0865276	-0.19467	0.25	0.329	1	TGFBR2	1.06285
SMARCE1	0.0867325	0.0948341	0.237	0.153	1	SMARCE1	1.06182
ARHGAP15	0.0872588	-0.157132	0.327	0.406	1	ARHGAP15	1.05919
CEP350	0.0875744	-0.170378	0.321	0.4	1	CEP350	1.05762
AC020916.1	0.0877236	0.111575	0.135	0.076	1	AC020916.1	1.05688
C2orf69	0.0877236	0.104691	0.135	0.076	1	C2orf69	1.05688
RC3H2	0.0877837	0.125727	0.218	0.141	1	RC3H2	1.05659
FAM13B	0.087818	-0.148039	0.16	0.235	1	FAM13B	1.05642
RABL2B	0.0878301	0.149199	0.103	0.053	1	RABL2B	1.05636
TPRG1L	0.0878854	-0.14017	0.071	0.124	1	TPRG1L	1.05608
PSME3	0.0878918	-0.137429	0.064	0.118	1	PSME3	1.05605
LPAR2	0.0880974	-0.120042	0.071	0.124	1	LPAR2	1.05504
USP25	0.0882536	-0.160531	0.128	0.194	1	USP25	1.05427
FAM98A	0.0887678	-0.129893	0.064	0.118	1	FAM98A	1.05174
ADPGK	0.0891111	0.128034	0.199	0.129	1	ADPGK	1.05007
SRSF1	0.0894665	-0.166619	0.186	0.265	1	SRSF1	1.04834
HNRNPAB	0.0894978	-0.0853307	0.288	0.365	1	HNRNPAB	1.04819
CARF	0.0895382	-0.153848	0.09	0.147	1	CARF	1.04799
ATR	0.0895693	-0.113493	0.077	0.135	1	ATR	1.04784
ZC3H6	0.0896047	-0.121136	0.096	0.159	1	ZC3H6	1.04767
POLR2C	0.0899397	-0.172627	0.205	0.271	1	POLR2C	1.04605
BRI3	0.0900303	0.180563	0.391	0.294	1	BRI3	1.04561
ANKRD17	0.0905681	-0.142907	0.154	0.229	1	ANKRD17	1.04302
ZC3H18	0.0906393	-0.144033	0.192	0.265	1	ZC3H18	1.04268
MRPS18B	0.0907189	0.144586	0.288	0.206	1	MRPS18B	1.0423
PLGRKT	0.0907974	-0.155267	0.16	0.229	1	PLGRKT	1.04193
EMP3	0.0908062	-0.105504	0.846	0.865	1	EMP3	1.04188
POLR2L	0.0909005	-0.166996	0.436	0.5	1	POLR2L	1.04143
CCDC88B	0.0909969	-0.13217	0.16	0.235	1	CCDC88B	1.04097
TMEM42	0.0911144	-0.0845296	0.058	0.112	1	TMEM42	1.04041
DUSP2	0.0915071	-0.336453	0.404	0.471	1	DUSP2	1.03855
AL357060.1	0.0915473	0.10347	0.128	0.071	1	AL357060.1	1.03835
PSMG1	0.0916881	0.108846	0.103	0.053	1	PSMG1	1.03769
NDUFAF7	0.0917351	-0.143977	0.083	0.141	1	NDUFAF7	1.03746
AKIRIN2	0.091833	-0.158825	0.173	0.247	1	AKIRIN2	1.037
PPM1A	0.0919188	-0.14134	0.096	0.159	1	PPM1A	1.0366
NECAP1	0.0920069	0.145717	0.173	0.112	1	NECAP1	1.03618
NSMCE1	0.0926415	0.112608	0.16	0.094	1	NSMCE1	1.03319
RPL17	0.092935	-0.13924	0.327	0.418	1	RPL17	1.03182
PIP4K2A	0.0929805	0.143396	0.462	0.406	1	PIP4K2A	1.03161
DCTN3	0.0931593	0.157638	0.385	0.312	1	DCTN3	1.03077
MAP2K3	0.0933131	0.109816	0.269	0.188	1	MAP2K3	1.03006
GIGYF1	0.0936224	0.137597	0.141	0.082	1	GIGYF1	1.02862
SELPLG	0.09378	0.150708	0.346	0.259	1	SELPLG	1.02789
SH3KBP1	0.0940104	0.16867	0.583	0.482	1	SH3KBP1	1.02682
ARFGAP3	0.0942029	0.144045	0.231	0.159	1	ARFGAP3	1.02594
ATP6V1B2	0.0942104	-0.10055	0.077	0.135	1	ATP6V1B2	1.0259
NBAS	0.0942289	-0.12599	0.083	0.141	1	NBAS	1.02582
MX2	0.0948431	0.0978928	0.173	0.106	1	MX2	1.02299
TRIM8	0.0949727	-0.129541	0.115	0.182	1	TRIM8	1.0224
UBE2Q1	0.0952142	0.14103	0.231	0.159	1	UBE2Q1	1.0213
SGTB	0.0953309	-0.12495	0.071	0.124	1	SGTB	1.02077
RCAN3	0.0954169	-0.123179	0.237	0.329	1	RCAN3	1.02037
IFT57	0.095681	0.0945024	0.103	0.053	1	IFT57	1.01917
WASF2	0.0959876	-0.149676	0.423	0.494	1	WASF2	1.01778
CPSF2	0.0964687	-0.126405	0.147	0.218	1	CPSF2	1.01561
ELK4	0.0966933	-0.0843289	0.167	0.253	1	ELK4	1.0146
STK26	0.0967213	0.104456	0.135	0.076	1	STK26	1.01448
SAP30BP	0.0967475	-0.108918	0.154	0.229	1	SAP30BP	1.01436
NME1	0.0967671	-0.129916	0.147	0.224	1	NME1	1.01427
EXOC7	0.0968894	-0.135882	0.192	0.265	1	EXOC7	1.01372
ASPSCR1	0.0969134	0.114509	0.109	0.059	1	ASPSCR1	1.01362
TTC3	0.0969869	-0.167222	0.308	0.394	1	TTC3	1.01329
SMC4	0.0971346	-0.183034	0.205	0.282	1	SMC4	1.01263
NAPA	0.0971933	-0.0876028	0.103	0.171	1	NAPA	1.01236
GPN3	0.0972631	-0.0931314	0.077	0.135	1	GPN3	1.01205
CKAP5	0.097729	0.0986646	0.103	0.053	1	CKAP5	1.00998
RPS20	0.0977845	0.0636156	0.981	0.988	1	RPS20	1.00973
ADRM1	0.0978102	-0.0951483	0.269	0.359	1	ADRM1	1.00962
ARRDC3	0.0979085	0.0827914	0.16	0.094	1	ARRDC3	1.00918
APEX1	0.0979655	0.168865	0.321	0.241	1	APEX1	1.00893
WDR20	0.0980485	0.117515	0.154	0.094	1	WDR20	1.00856
GZMM	0.0982434	-0.114031	0.763	0.847	1	GZMM	1.0077
MON2	0.0986876	-0.100355	0.122	0.188	1	MON2	1.00574
XIAP	0.0990226	0.153354	0.327	0.253	1	XIAP	1.00427
43899	0.0990536	-0.108903	0.135	0.206	1	43899	1.00413
RSL1D1	0.0991024	-0.150166	0.359	0.424	1	RSL1D1	1.00392
PPAN	0.0991872	-0.0941743	0.103	0.171	1	PPAN	1.00354
RASSF3	0.0995701	-0.134969	0.103	0.165	1	RASSF3	1.00187
PSMA7	0.0998038	-0.0796251	0.949	0.947	1	PSMA7	1.00085
MAPK9	0.0998188	-0.113852	0.083	0.141	1	MAPK9	1.00079
LRPAP1	0.100063	-0.105197	0.353	0.429	1	LRPAP1	0.999725
ELMO1	0.100157	-0.140936	0.109	0.171	1	ELMO1	0.99932
SLC39A1	0.100318	-0.188335	0.103	0.159	1	SLC39A1	0.998619
INTS11	0.100405	0.1178	0.269	0.188	1	INTS11	0.998246
ZDHHC24	0.100601	0.116796	0.192	0.124	1	ZDHHC24	0.997398
SPTBN1	0.100691	0.130063	0.199	0.129	1	SPTBN1	0.997009
UBAP2L	0.100962	0.155004	0.173	0.112	1	UBAP2L	0.995842
TP53TG1	0.100973	0.136529	0.115	0.065	1	TP53TG1	0.995794
ZNF506	0.10114	0.0810333	0.218	0.147	1	ZNF506	0.995077
SLC39A3	0.101232	0.137817	0.154	0.094	1	SLC39A3	0.994681
RPL32	0.101413	0.0716163	1	1	1	RPL32	0.993907
TTC14	0.101441	-0.0962199	0.353	0.453	1	TTC14	0.993787
SYTL2	0.101466	-0.0872224	0.109	0.176	1	SYTL2	0.993682
SLC6A6	0.101505	0.14813	0.218	0.147	1	SLC6A6	0.993512
MIDN	0.101794	0.116215	0.404	0.306	1	MIDN	0.992276
MRPS21	0.101868	0.140051	0.442	0.347	1	MRPS21	0.991964
UNK	0.102185	0.0840986	0.135	0.076	1	UNK	0.990611
EDRF1	0.102279	-0.113143	0.064	0.118	1	EDRF1	0.990213
PLEKHM1	0.102418	0.0937019	0.135	0.076	1	PLEKHM1	0.989623
UBR4	0.102502	-0.11108	0.135	0.2	1	UBR4	0.989266
RBPJ	0.102568	0.149792	0.346	0.265	1	RBPJ	0.988987
PRH1	0.102671	0.123628	0.308	0.229	1	PRH1	0.988552
DNAJB11	0.102821	-0.118467	0.141	0.212	1	DNAJB11	0.98792
ZFAND1	0.102879	-0.118055	0.09	0.147	1	ZFAND1	0.987672
ABTB1	0.103102	-0.130991	0.115	0.182	1	ABTB1	0.986733
RTF1	0.103244	0.170316	0.462	0.371	1	RTF1	0.986135
RAB18	0.103333	-0.164841	0.231	0.294	1	RAB18	0.985762
AC008105.3	0.103488	0.131646	0.301	0.218	1	AC008105.3	0.98511
ZBED1	0.103523	-0.116984	0.058	0.106	1	ZBED1	0.984965
UHRF2	0.103589	0.0689093	0.135	0.076	1	UHRF2	0.984686
RTRAF	0.103634	0.166239	0.647	0.571	1	RTRAF	0.984497
ZNF131	0.103654	0.17427	0.308	0.224	1	ZNF131	0.984412
LAMTOR3	0.104235	0.126864	0.173	0.112	1	LAMTOR3	0.981987
CUL5	0.104498	0.0947314	0.276	0.188	1	CUL5	0.980892
GOLGA4	0.104533	0.12535	0.551	0.459	1	GOLGA4	0.980746
OSBPL9	0.104728	-0.12643	0.071	0.124	1	OSBPL9	0.979937
TENT5C	0.104766	-0.10108	0.064	0.118	1	TENT5C	0.979779
PRKAG1	0.104799	0.102118	0.205	0.135	1	PRKAG1	0.979644
RPLP2	0.104894	0.0655732	0.987	0.994	1	RPLP2	0.979248
BOD1L1	0.104952	-0.151456	0.513	0.559	1	BOD1L1	0.979009
SCFD1	0.105011	-0.0865866	0.199	0.276	1	SCFD1	0.978766
YPEL5	0.105053	-0.155844	0.212	0.288	1	YPEL5	0.978593
MRPL41	0.105054	-0.114191	0.577	0.629	1	MRPL41	0.978587
LIMD2	0.105324	0.0983876	0.846	0.788	1	LIMD2	0.977471
GGA2	0.105438	0.086571	0.314	0.218	1	GGA2	0.977004
ISCA2	0.105593	0.121269	0.218	0.147	1	ISCA2	0.976365
THYN1	0.105715	-0.129619	0.199	0.265	1	THYN1	0.975863
CD3D	0.106033	-0.0692493	0.968	1	1	CD3D	0.974559
GNL2	0.106131	-0.105282	0.083	0.141	1	GNL2	0.974157
DNAJC1	0.106215	-0.13304	0.365	0.435	1	DNAJC1	0.973815
ARGLU1	0.106229	-0.16344	0.583	0.641	1	ARGLU1	0.973756
ZNF7	0.106244	-0.157802	0.103	0.159	1	ZNF7	0.973694
OSGEP	0.106323	-0.127639	0.109	0.171	1	OSGEP	0.973373
SLC16A4	0.106691	-0.107406	0.058	0.106	1	SLC16A4	0.971871
C1orf122	0.10674	-0.133928	0.167	0.235	1	C1orf122	0.971671
SLC35E3	0.107227	-0.143142	0.058	0.106	1	SLC35E3	0.969696
MIER1	0.107228	0.131239	0.487	0.4	1	MIER1	0.96969
ITM2B	0.107418	0.0856845	0.981	0.924	1	ITM2B	0.968921
DPM2	0.107474	0.136083	0.186	0.124	1	DPM2	0.968696
JUN	0.10749	0.20546	0.609	0.535	1	JUN	0.96863
FAM102A	0.107578	0.0936723	0.333	0.241	1	FAM102A	0.968277
KLF10	0.107892	0.088007	0.135	0.076	1	KLF10	0.967009
HP1BP3	0.107914	-0.0940259	0.494	0.6	1	HP1BP3	0.966922
LIMK1	0.108135	-0.125621	0.077	0.129	1	LIMK1	0.966032
TMEM183A	0.108151	0.124248	0.192	0.129	1	TMEM183A	0.965971
HSH2D	0.108186	-0.080992	0.071	0.124	1	HSH2D	0.96583
P2RY10	0.108387	0.162488	0.321	0.259	1	P2RY10	0.965021
TRMT11	0.108444	0.138351	0.173	0.112	1	TRMT11	0.964795
AMD1	0.108639	-0.148487	0.295	0.359	1	AMD1	0.964016
CDCA7	0.108854	-0.140613	0.103	0.165	1	CDCA7	0.963156
B3GALT4	0.108935	0.100712	0.237	0.159	1	B3GALT4	0.962833
CCDC32	0.108943	0.0956732	0.244	0.165	1	CCDC32	0.962802
RGL4	0.109182	-0.123162	0.199	0.265	1	RGL4	0.961848
CAND1	0.109316	0.13232	0.288	0.206	1	CAND1	0.961315
TMEM9B	0.109445	-0.102374	0.295	0.394	1	TMEM9B	0.960806
MED21	0.109604	-0.109001	0.077	0.129	1	MED21	0.960175
HPRT1	0.109926	0.177505	0.224	0.165	1	HPRT1	0.958901
NDEL1	0.110194	0.0534646	0.103	0.053	1	NDEL1	0.957844
SNX27	0.110205	0.104398	0.115	0.065	1	SNX27	0.9578
FUNDC1	0.110323	0.138097	0.128	0.076	1	FUNDC1	0.957335
BCL2A1	0.111036	0.102451	0.109	0.059	1	BCL2A1	0.954538
SIT1	0.111164	0.140548	0.513	0.424	1	SIT1	0.954036
AGPAT2	0.111217	0.105674	0.25	0.176	1	AGPAT2	0.953828
THOC2	0.111312	0.0803364	0.327	0.235	1	THOC2	0.953459
TYW3	0.111344	0.144325	0.205	0.141	1	TYW3	0.953332
GZMB	0.111442	0.215817	0.641	0.588	1	GZMB	0.952951
ARID4A	0.111509	0.111302	0.301	0.218	1	ARID4A	0.952692
RMND5A	0.111523	0.112716	0.122	0.071	1	RMND5A	0.952637
FCMR	0.11166	-0.138107	0.186	0.265	1	FCMR	0.952103
C12orf49	0.111845	-0.169506	0.109	0.165	1	C12orf49	0.951385
CNOT9	0.11193	0.0933163	0.147	0.088	1	CNOT9	0.951055
BFAR	0.111935	0.0882628	0.244	0.165	1	BFAR	0.951035
MYL6B	0.112247	-0.0984864	0.071	0.124	1	MYL6B	0.949824
TMEM69	0.1127	-0.0832741	0.058	0.106	1	TMEM69	0.948075
YWHAE	0.11309	-0.12277	0.353	0.429	1	YWHAE	0.946574
SRSF6	0.113231	-0.147912	0.128	0.194	1	SRSF6	0.946034
TRBC1	0.113233	-0.257057	0.679	0.718	1	TRBC1	0.946028
UBE2S	0.113254	0.138544	0.41	0.335	1	UBE2S	0.945945
RAB11A	0.113346	-0.142015	0.244	0.318	1	RAB11A	0.945596
POLE3	0.113648	-0.14731	0.09	0.147	1	POLE3	0.944438
ST3GAL2	0.113671	0.119974	0.173	0.112	1	ST3GAL2	0.94435
MOSMO	0.114323	-0.108774	0.071	0.124	1	MOSMO	0.941868
ZNF281	0.114733	0.183042	0.269	0.2	1	ZNF281	0.940312
SNU13	0.114764	-0.112412	0.564	0.629	1	SNU13	0.940196
CALR	0.115077	-0.186125	0.66	0.718	1	CALR	0.93901
PRDM1	0.115378	-0.118217	0.167	0.235	1	PRDM1	0.937877
TIMM10B	0.115457	-0.126372	0.109	0.171	1	TIMM10B	0.93758
PDCD6IP	0.115465	-0.102518	0.192	0.271	1	PDCD6IP	0.93755
VRK3	0.115655	-0.145043	0.179	0.247	1	VRK3	0.936837
ZNHIT3	0.115721	-0.209898	0.224	0.282	1	ZNHIT3	0.936589
HMGN3	0.115757	0.126785	0.397	0.318	1	HMGN3	0.936451
RBM38	0.115873	-0.0996063	0.186	0.265	1	RBM38	0.936019
RPF1	0.116026	0.105322	0.167	0.106	1	RPF1	0.935445
MRPS23	0.116077	-0.117032	0.212	0.294	1	MRPS23	0.935254
KIAA1551	0.116269	-0.0961708	0.872	0.924	1	KIAA1551	0.934537
CHD3	0.116702	-0.0887997	0.231	0.312	1	CHD3	0.932923
COPB1	0.11717	-0.0689395	0.256	0.347	1	COPB1	0.931185
PAFAH1B1	0.117313	-0.0940242	0.365	0.459	1	PAFAH1B1	0.930655
MEAF6	0.117537	-0.147486	0.353	0.424	1	MEAF6	0.929826
AKAP5	0.117701	-0.0838675	0.077	0.129	1	AKAP5	0.92922
SIGMAR1	0.117812	-0.0995687	0.058	0.106	1	SIGMAR1	0.92881
RECQL	0.117872	-0.18832	0.224	0.282	1	RECQL	0.928591
YARS	0.117891	0.0826148	0.25	0.171	1	YARS	0.92852
C19orf53	0.118184	-0.110647	0.66	0.729	1	C19orf53	0.92744
FAM104B	0.118222	-0.0964371	0.077	0.129	1	FAM104B	0.927301
ZNF641	0.118973	-0.0888914	0.058	0.106	1	ZNF641	0.924553
DYNLL1	0.119124	0.122142	0.84	0.788	1	DYNLL1	0.923999
CD37	0.119508	0.094165	0.744	0.7	1	CD37	0.922602
ZSWIM8	0.119856	0.120534	0.135	0.082	1	ZSWIM8	0.921342
PIM3	0.11988	0.077388	0.321	0.229	1	PIM3	0.921254
UBR1	0.119973	0.1216	0.192	0.129	1	UBR1	0.920916
KRR1	0.120184	-0.112175	0.244	0.329	1	KRR1	0.920154
HELLS	0.120326	-0.098646	0.077	0.129	1	HELLS	0.919642
SEC23A	0.120337	0.0535162	0.141	0.082	1	SEC23A	0.919601
PILRB	0.120401	-0.169984	0.192	0.259	1	PILRB	0.91937
FAM133B	0.120404	0.134625	0.449	0.359	1	FAM133B	0.91936
PTPN18	0.120709	0.10045	0.224	0.153	1	PTPN18	0.91826
PARVG	0.120713	-0.174454	0.263	0.335	1	PARVG	0.918246
NDUFA10	0.120785	0.0879414	0.269	0.188	1	NDUFA10	0.917988
CSTF3	0.120856	-0.106734	0.077	0.129	1	CSTF3	0.917732
COIL	0.120891	-0.15693	0.147	0.206	1	COIL	0.917605
NR3C1	0.121039	-0.0829161	0.353	0.447	1	NR3C1	0.917075
PARP9	0.121155	0.0616917	0.321	0.235	1	PARP9	0.916659
AP1G1	0.121169	0.107599	0.167	0.106	1	AP1G1	0.91661
AC090152.1	0.121234	-0.10853	0.122	0.182	1	AC090152.1	0.916377
MIGA1	0.12125	0.118871	0.128	0.076	1	MIGA1	0.91632
NPIPB5	0.121277	-0.0872846	0.071	0.124	1	NPIPB5	0.916223
ZFP90	0.12132	-0.0740761	0.058	0.106	1	ZFP90	0.916067
NRAS	0.121522	-0.139045	0.09	0.141	1	NRAS	0.915344
GRAP2	0.12153	0.230427	0.436	0.365	1	GRAP2	0.915317
RABEP1	0.121593	-0.123047	0.224	0.294	1	RABEP1	0.915092
ITCH	0.121858	0.154675	0.231	0.165	1	ITCH	0.914146
XRCC6	0.12216	-0.0946094	0.468	0.565	1	XRCC6	0.913071
CWC25	0.122351	-0.137907	0.173	0.247	1	CWC25	0.912392
ZNF639	0.122375	-0.0633477	0.071	0.124	1	ZNF639	0.912306
MRPS33	0.122458	0.123974	0.34	0.265	1	MRPS33	0.912011
ZNF493	0.122495	0.111289	0.199	0.135	1	ZNF493	0.911882
MAGOH	0.122881	-0.0951466	0.423	0.488	1	MAGOH	0.910516
WTAP	0.123145	-0.107502	0.353	0.435	1	WTAP	0.909585
HBS1L	0.123167	-0.104381	0.141	0.206	1	HBS1L	0.909506
FBH1	0.123246	0.0226449	0.167	0.1	1	FBH1	0.909229
ZNF720	0.123246	-0.128786	0.103	0.159	1	ZNF720	0.909229
POLK	0.12335	0.135285	0.25	0.176	1	POLK	0.908859
WHAMM	0.123854	0.110572	0.154	0.094	1	WHAMM	0.907092
ORAI1	0.123865	0.172642	0.519	0.459	1	ORAI1	0.907052
TPMT	0.124117	0.0843004	0.115	0.065	1	TPMT	0.906167
TPRG1	0.124261	0.16329	0.147	0.094	1	TPRG1	0.905667
BRIX1	0.124264	-0.135025	0.135	0.194	1	BRIX1	0.905654
ZSCAN26	0.124485	0.122438	0.103	0.059	1	ZSCAN26	0.904884
UGGT1	0.124522	0.105787	0.128	0.076	1	UGGT1	0.904753
SHISAL2A	0.124582	0.108345	0.16	0.1	1	SHISAL2A	0.904544
MRPL34	0.124942	-0.140736	0.321	0.388	1	MRPL34	0.90329
VPS13C	0.124947	0.122699	0.494	0.412	1	VPS13C	0.903275
HDDC2	0.124981	0.167148	0.417	0.329	1	HDDC2	0.903157
SCAI	0.125074	0.110888	0.128	0.076	1	SCAI	0.902832
KCMF1	0.125533	0.159529	0.282	0.212	1	KCMF1	0.901242
METTL18	0.125628	0.0983414	0.128	0.076	1	METTL18	0.900912
GBF1	0.125875	-0.105074	0.064	0.112	1	GBF1	0.90006
RAC1	0.125881	-0.129179	0.583	0.641	1	RAC1	0.900039
MHENCR	0.12592	-0.0720695	0.083	0.141	1	MHENCR	0.899907
LAMTOR2	0.125939	0.138417	0.378	0.3	1	LAMTOR2	0.899839
ACIN1	0.126054	-0.174606	0.244	0.312	1	ACIN1	0.899445
SMARCAD1	0.126229	-0.152779	0.109	0.165	1	SMARCAD1	0.898841
MAGT1	0.126318	0.13731	0.147	0.094	1	MAGT1	0.898536
DYNLRB1	0.126544	0.111862	0.628	0.571	1	DYNLRB1	0.897758
RAB3GAP2	0.126558	-0.113938	0.115	0.176	1	RAB3GAP2	0.897711
MSH6	0.126639	0.123167	0.173	0.112	1	MSH6	0.897433
ICOS	0.126689	-0.162186	0.103	0.159	1	ICOS	0.897261
SSR1	0.126842	-0.0932871	0.212	0.288	1	SSR1	0.896736
ARHGAP4	0.127045	-0.122066	0.256	0.335	1	ARHGAP4	0.896042
TRMT2A	0.127058	-0.109509	0.064	0.112	1	TRMT2A	0.895999
DDX6	0.127182	0.138144	0.487	0.406	1	DDX6	0.895574
COPS5	0.127494	-0.117706	0.244	0.318	1	COPS5	0.894512
CGGBP1	0.127633	0.0733466	0.385	0.288	1	CGGBP1	0.894038
RAB35	0.127878	0.12198	0.147	0.094	1	RAB35	0.893205
XCL2	0.128029	-0.232037	0.173	0.235	1	XCL2	0.892693
GATA3	0.128649	-0.126453	0.179	0.241	1	GATA3	0.890592
DNAJC2	0.128857	-0.128207	0.179	0.241	1	DNAJC2	0.889894
MBD3	0.129063	0.0670666	0.147	0.088	1	MBD3	0.889197
TENT4B	0.12916	0.0445205	0.122	0.071	1	TENT4B	0.888872
KPNA4	0.129401	-0.123441	0.224	0.288	1	KPNA4	0.888061
HBP1	0.129427	0.118831	0.179	0.118	1	HBP1	0.887976
B4GALT3	0.129465	0.0957759	0.167	0.106	1	B4GALT3	0.887848
LDLRAD4	0.129522	-0.053896	0.186	0.259	1	LDLRAD4	0.887655
CYB5B	0.129597	-0.127221	0.212	0.282	1	CYB5B	0.887404
AC004585.1	0.1297	-0.137402	0.103	0.159	1	AC004585.1	0.887061
TALDO1	0.129724	0.150378	0.545	0.471	1	TALDO1	0.886979
ZDHHC20	0.130052	-0.0926959	0.064	0.112	1	ZDHHC20	0.885883
TTC9C	0.13008	0.0969676	0.135	0.082	1	TTC9C	0.88579
STX18	0.130187	-0.101716	0.083	0.135	1	STX18	0.885432
EIF4G2	0.130445	-0.136707	0.532	0.582	1	EIF4G2	0.884572
SGMS1	0.131214	0.0577756	0.122	0.071	1	SGMS1	0.882021
LASP1	0.131437	0.129917	0.391	0.329	1	LASP1	0.881282
TOLLIP	0.131837	0.109171	0.141	0.088	1	TOLLIP	0.879963
TRIM22	0.131899	0.187946	0.385	0.353	1	TRIM22	0.87976
PATJ	0.132385	0.10517	0.141	0.088	1	PATJ	0.87816
FAM76B	0.132391	-0.12972	0.096	0.147	1	FAM76B	0.878142
UIMC1	0.132496	0.0722454	0.167	0.106	1	UIMC1	0.877797
ARID4B	0.132657	-0.146608	0.571	0.671	1	ARID4B	0.87727
NDUFA3	0.132757	0.120302	0.449	0.388	1	NDUFA3	0.876942
PHF5A	0.133282	-0.119171	0.103	0.159	1	PHF5A	0.875229
MAP7D3	0.133313	0.131219	0.103	0.059	1	MAP7D3	0.875126
DDX1	0.133456	-0.129229	0.096	0.147	1	DDX1	0.874662
FUNDC2	0.133514	-0.130599	0.179	0.247	1	FUNDC2	0.874473
USP4	0.133727	0.109166	0.147	0.094	1	USP4	0.873782
ARFRP1	0.13375	-0.134994	0.154	0.212	1	ARFRP1	0.873708
ACTR3	0.133973	0.102581	0.756	0.694	1	ACTR3	0.872981
TOP2B	0.134905	0.103501	0.436	0.329	1	TOP2B	0.869971
CYB5R3	0.135363	-0.0991144	0.103	0.159	1	CYB5R3	0.8685
TRMT1	0.135923	0.107122	0.103	0.059	1	TRMT1	0.866707
USO1	0.135943	-0.146278	0.16	0.218	1	USO1	0.866644
NUP50	0.136022	-0.155164	0.218	0.288	1	NUP50	0.866391
IFT27	0.136205	-0.0845979	0.064	0.112	1	IFT27	0.865808
PTEN	0.136306	0.117451	0.295	0.224	1	PTEN	0.865484
RPIA	0.136352	-0.140595	0.115	0.171	1	RPIA	0.865337
WASHC1	0.136581	0.118128	0.103	0.059	1	WASHC1	0.864608
CXCR3	0.137262	0.0906016	0.712	0.594	1	CXCR3	0.86245
KIAA0040	0.137371	-0.108573	0.167	0.235	1	KIAA0040	0.862106
MRPS2	0.137401	0.117411	0.141	0.088	1	MRPS2	0.862009
CREM	0.137609	-0.121919	0.128	0.188	1	CREM	0.861354
KMT2C	0.137914	0.117385	0.269	0.2	1	KMT2C	0.860392
SOS1	0.138167	-0.0931362	0.186	0.253	1	SOS1	0.859595
STUB1	0.138209	0.121091	0.526	0.435	1	STUB1	0.859465
MBNL1	0.138415	-0.105834	0.622	0.694	1	MBNL1	0.858818
A1BG	0.139238	0.159659	0.179	0.124	1	A1BG	0.856242
ADI1	0.139373	-0.121311	0.071	0.118	1	ADI1	0.85582
IRF1	0.139551	0.133841	0.904	0.865	1	IRF1	0.855268
RBM12B	0.139888	-0.170327	0.103	0.153	1	RBM12B	0.854219
CBWD5	0.13993	0.107001	0.212	0.147	1	CBWD5	0.854088
ABHD13	0.140207	0.0677154	0.173	0.112	1	ABHD13	0.85323
TSTD1	0.140275	-0.0917423	0.41	0.5	1	TSTD1	0.853019
TXNDC9	0.140428	0.0774892	0.346	0.259	1	TXNDC9	0.852546
GRK5	0.14045	0.102798	0.109	0.065	1	GRK5	0.852479
DOCK2	0.140528	0.111703	0.282	0.218	1	DOCK2	0.852236
G2E3	0.140615	-0.110214	0.071	0.118	1	G2E3	0.851969
ATM	0.140716	-0.14598	0.603	0.629	1	ATM	0.851657
SLC25A3	0.140927	0.0937186	0.75	0.688	1	SLC25A3	0.851007
DYNC1LI2	0.140963	-0.138623	0.16	0.224	1	DYNC1LI2	0.850896
DDT	0.14104	0.155259	0.442	0.359	1	DDT	0.850657
RPS15	0.141131	0.0638399	1	1	1	RPS15	0.850377
IVNS1ABP	0.141195	0.0298276	0.212	0.135	1	IVNS1ABP	0.850182
POP5	0.14121	-0.106284	0.256	0.341	1	POP5	0.850133
GYPC	0.141591	-0.117105	0.692	0.718	1	GYPC	0.848966
DDX46	0.141704	0.151085	0.622	0.547	1	DDX46	0.848618
LRRC58	0.141764	0.090322	0.154	0.1	1	LRRC58	0.848433
CERS5	0.141795	-0.0814206	0.077	0.129	1	CERS5	0.84834
ISOC2	0.142041	0.130017	0.154	0.1	1	ISOC2	0.847586
ELOA	0.142065	0.0925084	0.192	0.129	1	ELOA	0.847513
MED17	0.142114	-0.0993962	0.083	0.135	1	MED17	0.847363
TTC5	0.142319	0.106406	0.154	0.1	1	TTC5	0.846738
ENTR1	0.142572	0.139218	0.16	0.106	1	ENTR1	0.845965
PEX2	0.14261	0.135505	0.263	0.206	1	PEX2	0.845851
SUB1	0.142922	0.0527276	0.904	0.924	1	SUB1	0.844902
SYTL3	0.142968	-0.0881576	0.179	0.259	1	SYTL3	0.844761
AFTPH	0.143063	-0.118315	0.115	0.171	1	AFTPH	0.844472
IFI35	0.143112	0.136747	0.346	0.271	1	IFI35	0.844325
DNAJC16	0.143229	-0.0748141	0.064	0.112	1	DNAJC16	0.843968
PPP1R9B	0.143303	0.101995	0.103	0.059	1	PPP1R9B	0.843746
TBC1D22A	0.143331	-0.118878	0.122	0.176	1	TBC1D22A	0.843659
KDSR	0.143729	0.120872	0.141	0.088	1	KDSR	0.842454
ZNF675	0.143778	-0.105752	0.09	0.141	1	ZNF675	0.842306
RAB2B	0.143988	0.0977251	0.103	0.059	1	RAB2B	0.841672
CDK11B	0.143994	-0.181925	0.186	0.241	1	CDK11B	0.841654
AZI2	0.144081	-0.134176	0.128	0.188	1	AZI2	0.841394
DCAF13	0.144248	0.140365	0.244	0.182	1	DCAF13	0.840891
MPHOSPH8	0.144351	-0.0991895	0.59	0.659	1	MPHOSPH8	0.840579
NFYB	0.144474	-0.149674	0.179	0.241	1	NFYB	0.84021
CEP135	0.144489	-0.103695	0.103	0.159	1	CEP135	0.840166
CNOT11	0.144535	-0.0840164	0.115	0.176	1	CNOT11	0.840027
NIT2	0.144568	-0.0943875	0.135	0.194	1	NIT2	0.839929
SNX14	0.144721	0.113712	0.224	0.159	1	SNX14	0.839468
TMEM256	0.145059	0.124448	0.25	0.188	1	TMEM256	0.838455
USP34	0.145288	0.0964679	0.378	0.282	1	USP34	0.837771
TMEM106B	0.145303	-0.156806	0.173	0.229	1	TMEM106B	0.837727
SLC39A4	0.145368	0.105253	0.103	0.059	1	SLC39A4	0.837532
SEL1L3	0.145675	-0.115326	0.154	0.218	1	SEL1L3	0.836614
PHAX	0.146197	-0.112795	0.256	0.335	1	PHAX	0.83506
TM2D2	0.146365	0.07379	0.135	0.082	1	TM2D2	0.834562
ZC3H15	0.14642	-0.155523	0.397	0.453	1	ZC3H15	0.834401
ADH5	0.14681	0.162273	0.391	0.318	1	ADH5	0.833246
SH3BGRL	0.146904	0.137984	0.513	0.453	1	SH3BGRL	0.832966
RBBP7	0.14693	-0.103253	0.167	0.235	1	RBBP7	0.832889
C19orf70	0.146956	0.135901	0.487	0.406	1	C19orf70	0.832812
ARHGEF3	0.147051	0.165366	0.224	0.165	1	ARHGEF3	0.832532
EHMT1	0.147111	-0.0798649	0.135	0.2	1	EHMT1	0.832354
AES	0.147172	-0.116102	0.718	0.794	1	AES	0.832174
MACO1	0.1475	-0.128982	0.077	0.124	1	MACO1	0.831208
GABPB1-AS1	0.147678	-0.131649	0.404	0.482	1	GABPB1-AS1	0.830685
RBBP4	0.147734	0.116998	0.301	0.229	1	RBBP4	0.830518
LYPLA2	0.147749	-0.13267	0.212	0.271	1	LYPLA2	0.830474
BCAS2	0.147923	0.103575	0.244	0.176	1	BCAS2	0.829966
PDHA1	0.148245	-0.128124	0.16	0.224	1	PDHA1	0.829021
HIPK3	0.148696	0.0917187	0.192	0.129	1	HIPK3	0.8277
ZNF678	0.148778	-0.124398	0.064	0.106	1	ZNF678	0.827462
MITD1	0.149063	0.0790055	0.314	0.235	1	MITD1	0.82663
AIM2	0.149205	0.114588	0.122	0.076	1	AIM2	0.826215
ME2	0.149902	0.115177	0.212	0.147	1	ME2	0.824192
MCTP2	0.150029	0.0778545	0.128	0.076	1	MCTP2	0.823825
HCCS	0.150275	0.0823952	0.103	0.059	1	HCCS	0.823114
SNX17	0.15131	0.140047	0.353	0.288	1	SNX17	0.820131
WWC3	0.151325	0.119061	0.147	0.094	1	WWC3	0.820089
ARF3	0.151412	-0.128865	0.096	0.147	1	ARF3	0.819839
TNFAIP3	0.151426	0.0655924	0.346	0.265	1	TNFAIP3	0.819801
APOBEC3H	0.151622	0.0486376	0.295	0.2	1	APOBEC3H	0.819237
GBP4	0.151657	0.0928045	0.462	0.359	1	GBP4	0.819138
NIPSNAP1	0.151792	0.118537	0.122	0.076	1	NIPSNAP1	0.81875
GUCD1	0.151792	0.115923	0.122	0.076	1	GUCD1	0.81875
ATG4B	0.151792	0.115618	0.122	0.076	1	ATG4B	0.81875
STX17	0.152002	-0.0952224	0.096	0.147	1	STX17	0.818151
FOXO1	0.152104	0.0919736	0.141	0.088	1	FOXO1	0.81786
SVIP	0.15238	-0.127776	0.263	0.324	1	SVIP	0.817073
SLC25A37	0.152587	-0.070442	0.096	0.153	1	SLC25A37	0.816483
ITGB2-AS1	0.152591	-0.109711	0.077	0.124	1	ITGB2-AS1	0.816472
BZW1	0.152599	0.107326	0.615	0.547	1	BZW1	0.816448
TMCO1	0.153085	-0.114948	0.417	0.529	1	TMCO1	0.815069
SNRPN	0.153205	0.12695	0.417	0.335	1	SNRPN	0.814726
EBAG9	0.153386	-0.110985	0.122	0.182	1	EBAG9	0.814215
ATL3	0.153755	0.113534	0.122	0.076	1	ATL3	0.813171
PSMA3	0.153845	-0.101215	0.506	0.565	1	PSMA3	0.812916
ASF1A	0.15386	-0.0986841	0.231	0.306	1	ASF1A	0.812874
CARS	0.153927	-0.0714937	0.122	0.182	1	CARS	0.812686
MRPL18	0.153935	0.124734	0.308	0.229	1	MRPL18	0.812662
USP14	0.154007	-0.126227	0.25	0.312	1	USP14	0.812459
CDC16	0.154791	-0.0904941	0.09	0.141	1	CDC16	0.810255
ADA	0.154867	0.0771561	0.173	0.112	1	ADA	0.810042
PSMC6	0.154871	-0.121292	0.263	0.329	1	PSMC6	0.810029
DCAF6	0.155004	-0.113876	0.064	0.106	1	DCAF6	0.809657
NAA60	0.155087	0.0635347	0.199	0.129	1	NAA60	0.809424
SELENOF	0.155277	0.0891137	0.545	0.5	1	SELENOF	0.808893
STMP1	0.155497	-0.156195	0.333	0.394	1	STMP1	0.808279
MED8	0.155553	-0.0977385	0.115	0.171	1	MED8	0.808122
LENG8	0.155571	-0.16479	0.186	0.241	1	LENG8	0.808072
CUL1	0.15562	-0.137575	0.135	0.188	1	CUL1	0.807935
CD69	0.155743	-0.139246	0.308	0.388	1	CD69	0.807591
KMT2E	0.156118	0.11377	0.647	0.541	1	KMT2E	0.806546
RSBN1L	0.156283	-0.133962	0.385	0.476	1	RSBN1L	0.806088
RALGAPA1	0.156346	-0.117173	0.212	0.276	1	RALGAPA1	0.805914
GTPBP1	0.156496	-0.103156	0.077	0.124	1	GTPBP1	0.805497
STMN1	0.157491	-0.129967	0.103	0.153	1	STMN1	0.802746
FLAD1	0.157541	0.0785157	0.115	0.071	1	FLAD1	0.802607
PDIA3	0.157608	0.0749821	0.737	0.618	1	PDIA3	0.802421
STIM2	0.157945	0.121714	0.282	0.212	1	STIM2	0.801495
FEM1B	0.158477	-0.11146	0.077	0.124	1	FEM1B	0.800035
ARFIP2	0.158924	0.0794755	0.115	0.071	1	ARFIP2	0.79881
LINC02084	0.159274	-0.123258	0.128	0.182	1	LINC02084	0.797854
LY9	0.159639	0.0573538	0.218	0.147	1	LY9	0.79686
OGT	0.159732	0.136128	0.474	0.394	1	OGT	0.796607
NFX1	0.159808	-0.088227	0.077	0.124	1	NFX1	0.796403
LSM2	0.159908	0.129377	0.41	0.324	1	LSM2	0.796129
CAPN15	0.159982	0.079278	0.109	0.065	1	CAPN15	0.79593
MYO1F	0.160103	-0.109762	0.583	0.688	1	MYO1F	0.795602
CASP7	0.160347	0.0878522	0.154	0.1	1	CASP7	0.79494
TOB1	0.16066	-0.0682839	0.115	0.171	1	TOB1	0.794094
NUBP1	0.160908	0.14243	0.135	0.088	1	NUBP1	0.793422
GOLGB1	0.160911	-0.117937	0.397	0.453	1	GOLGB1	0.793413
MAPK3	0.161016	0.0970902	0.115	0.071	1	MAPK3	0.79313
RAD23A	0.161078	-0.152021	0.365	0.429	1	RAD23A	0.792965
PDCD11	0.161395	0.115496	0.128	0.082	1	PDCD11	0.792111
KIDINS220	0.16173	-0.087642	0.147	0.212	1	KIDINS220	0.791209
EXOSC10	0.161798	0.0960575	0.122	0.076	1	EXOSC10	0.791027
DDX42	0.162159	0.0966849	0.282	0.218	1	DDX42	0.79006
RNF187	0.16218	-0.124401	0.218	0.282	1	RNF187	0.790004
SPRTN	0.162218	-0.1017	0.167	0.229	1	SPRTN	0.789901
PPP2R2B	0.162331	0.1031	0.179	0.124	1	PPP2R2B	0.7896
TMEM116	0.162516	0.0819158	0.109	0.065	1	TMEM116	0.789105
BIRC3	0.162738	0.0152509	0.365	0.271	1	BIRC3	0.788512
CENPT	0.162952	0.103232	0.147	0.094	1	CENPT	0.787941
IDH2	0.163039	0.081729	0.635	0.576	1	IDH2	0.787707
E2F3	0.163427	-0.202526	0.179	0.229	1	E2F3	0.786676
SYT11	0.163513	-0.0988762	0.103	0.153	1	SYT11	0.786448
C7orf26	0.163611	-0.111745	0.064	0.106	1	C7orf26	0.786188
PMPCB	0.163773	-0.080663	0.135	0.188	1	PMPCB	0.785757
PDPK1	0.163861	-0.0762902	0.09	0.141	1	PDPK1	0.785523
NTHL1	0.164066	0.119948	0.128	0.082	1	NTHL1	0.784981
HEXA	0.164328	0.0601142	0.314	0.229	1	HEXA	0.784287
BDP1	0.164929	-0.168644	0.321	0.388	1	BDP1	0.782703
BLMH	0.16499	0.0832877	0.103	0.059	1	BLMH	0.782541
BCDIN3D	0.16499	0.0709835	0.103	0.059	1	BCDIN3D	0.782541
FNTA	0.165057	-0.113656	0.269	0.335	1	FNTA	0.782366
ADIPOR2	0.165241	0.114849	0.122	0.076	1	ADIPOR2	0.781881
ERCC4	0.165241	0.0985998	0.122	0.076	1	ERCC4	0.781881
DDHD1	0.165325	-0.0867299	0.237	0.306	1	DDHD1	0.781661
METTL2A	0.165355	0.0671774	0.141	0.088	1	METTL2A	0.781583
THUMPD1	0.165357	0.144936	0.359	0.282	1	THUMPD1	0.781577
ATAD1	0.16545	-0.154325	0.179	0.229	1	ATAD1	0.781334
ABCB8	0.165818	-0.132022	0.064	0.106	1	ABCB8	0.780369
TMED4	0.166178	0.143851	0.385	0.312	1	TMED4	0.779427
HOOK3	0.16637	0.116105	0.244	0.176	1	HOOK3	0.778926
ZCCHC17	0.166539	0.078775	0.212	0.147	1	ZCCHC17	0.778484
MT-ND4	0.166552	0.0562887	1	1	1	MT-ND4	0.778449
DAZAP1	0.166707	-0.0901337	0.154	0.212	1	DAZAP1	0.778046
CYHR1	0.167084	-0.159408	0.173	0.224	1	CYHR1	0.777065
RNFT1	0.167795	-0.0610618	0.083	0.135	1	RNFT1	0.775221
SLMAP	0.168175	0.0916171	0.167	0.112	1	SLMAP	0.774239
ECHDC1	0.168262	-0.0552593	0.212	0.294	1	ECHDC1	0.774013
ARL14EP	0.168829	-0.118741	0.16	0.218	1	ARL14EP	0.772554
ST13	0.169036	-0.153711	0.359	0.406	1	ST13	0.772022
YIF1A	0.16905	0.128474	0.269	0.206	1	YIF1A	0.771986
LRRC59	0.16905	-0.0728716	0.103	0.159	1	LRRC59	0.771984
PIK3CA	0.169224	0.103478	0.147	0.1	1	PIK3CA	0.771538
BCL2L1	0.169296	-0.137558	0.09	0.135	1	BCL2L1	0.771354
DEXI	0.169852	-0.105577	0.122	0.176	1	DEXI	0.769929
GMEB1	0.170012	-0.117065	0.128	0.182	1	GMEB1	0.76952
ZAP70	0.170152	0.125225	0.365	0.288	1	ZAP70	0.769162
RCOR3	0.170154	0.101075	0.122	0.076	1	RCOR3	0.769157
COMMD10	0.170154	0.095112	0.122	0.076	1	COMMD10	0.769157
ZNF32	0.17026	-0.0961849	0.141	0.194	1	ZNF32	0.768888
NUP58	0.170689	-0.103829	0.071	0.112	1	NUP58	0.767793
NR2C2AP	0.17089	0.0926896	0.128	0.082	1	NR2C2AP	0.767284
COPS9	0.171102	-0.0498839	0.538	0.618	1	COPS9	0.766745
TRIP11	0.171303	0.110212	0.34	0.271	1	TRIP11	0.766234
ITFG2	0.17137	-0.0633581	0.173	0.235	1	ITFG2	0.766065
SLC35E2B	0.171423	-0.121506	0.071	0.112	1	SLC35E2B	0.765931
TSC2	0.171425	0.0757808	0.186	0.124	1	TSC2	0.765927
BBX	0.172	-0.0984266	0.365	0.441	1	BBX	0.764472
SOD1	0.172109	-0.121683	0.705	0.741	1	SOD1	0.764196
NMD3	0.172293	0.10522	0.122	0.076	1	NMD3	0.763732
RRBP1	0.172508	0.0857921	0.135	0.088	1	RRBP1	0.763191
TMEM161A	0.172528	0.0814082	0.115	0.071	1	TMEM161A	0.763142
HOOK2	0.172528	0.0635802	0.115	0.071	1	HOOK2	0.763142
CMTM3	0.172762	-0.0978428	0.301	0.371	1	CMTM3	0.762552
DNAJC17	0.172876	-0.0692225	0.077	0.124	1	DNAJC17	0.762264
EIF4EBP1	0.173124	0.159457	0.218	0.165	1	EIF4EBP1	0.761644
DSTN	0.173475	-0.0961827	0.186	0.253	1	DSTN	0.760763
PEPD	0.17349	0.117654	0.179	0.129	1	PEPD	0.760725
ATP6V0B	0.173612	0.0792577	0.513	0.418	1	ATP6V0B	0.760419
LRIF1	0.174	0.123718	0.256	0.182	1	LRIF1	0.759451
ACTR6	0.17451	0.10986	0.224	0.165	1	ACTR6	0.758179
SOCS4	0.174788	0.129099	0.154	0.106	1	SOCS4	0.757489
DDX18	0.174899	0.0709848	0.5	0.406	1	DDX18	0.757213
BIRC2	0.175162	0.113807	0.244	0.176	1	BIRC2	0.756561
COX8A	0.175271	-0.0673588	0.667	0.735	1	COX8A	0.756291
KXD1	0.175373	-0.154657	0.141	0.194	1	KXD1	0.756038
XBP1	0.175501	0.0728844	0.25	0.176	1	XBP1	0.755722
FLNA	0.175506	0.124796	0.558	0.494	1	FLNA	0.755707
G3BP1	0.175704	0.0446419	0.353	0.265	1	G3BP1	0.755217
TSPOAP1-AS1	0.175723	-0.0889431	0.135	0.188	1	TSPOAP1-AS1	0.755171
COPRS	0.175727	-0.0689822	0.077	0.124	1	COPRS	0.755162
ANKRD11	0.175732	-0.143552	0.538	0.594	1	ANKRD11	0.755148
CDC42	0.175802	0.10011	0.801	0.706	1	CDC42	0.754976
VOPP1	0.175819	0.105139	0.276	0.206	1	VOPP1	0.754935
ZMYM2	0.176049	0.111574	0.25	0.194	1	ZMYM2	0.754366
NOP10	0.176208	-0.149037	0.628	0.629	1	NOP10	0.753974
KCTD5	0.176626	0.0935511	0.135	0.088	1	KCTD5	0.752946
PASK	0.176845	-0.0625471	0.141	0.2	1	PASK	0.752408
RHOA	0.176845	0.0903301	0.801	0.729	1	RHOA	0.752407
SDCCAG8	0.177121	0.150435	0.167	0.118	1	SDCCAG8	0.75173
PRR5	0.177211	0.0897571	0.128	0.082	1	PRR5	0.751509
GCLM	0.177235	0.115537	0.224	0.165	1	GCLM	0.751451
MOCS2	0.177242	-0.134214	0.096	0.141	1	MOCS2	0.751434
ICE1	0.177329	-0.156524	0.212	0.265	1	ICE1	0.751221
APMAP	0.177428	-0.135048	0.308	0.365	1	APMAP	0.750977
VPS28	0.177503	-0.0518067	0.699	0.782	1	VPS28	0.750795
MAP3K4	0.177753	0.0915028	0.115	0.071	1	MAP3K4	0.750183
YARS2	0.178014	0.105067	0.135	0.088	1	YARS2	0.749545
SIVA1	0.178251	-0.0850908	0.429	0.512	1	SIVA1	0.748968
NUDT5	0.178366	-0.126603	0.321	0.371	1	NUDT5	0.748687
RANGAP1	0.178553	-0.0790062	0.083	0.129	1	RANGAP1	0.748233
ANXA5	0.178661	-0.117224	0.513	0.559	1	ANXA5	0.747971
PPP1R14B	0.178716	0.212438	0.686	0.588	1	PPP1R14B	0.747837
COMMD2	0.178721	-0.132687	0.231	0.288	1	COMMD2	0.747824
DMTF1	0.178924	-0.134729	0.154	0.206	1	DMTF1	0.747332
MED7	0.179025	0.0788024	0.167	0.112	1	MED7	0.747086
LINC00513	0.179267	0.0843312	0.115	0.071	1	LINC00513	0.746499
BAD	0.179326	0.128042	0.154	0.106	1	BAD	0.746357
KLF12	0.179356	0.0938004	0.128	0.082	1	KLF12	0.746283
NDUFS5	0.180036	-0.0644837	0.782	0.8	1	NDUFS5	0.744642
MED4	0.180274	-0.0954383	0.288	0.359	1	MED4	0.744067
TAF9	0.180546	0.0925988	0.224	0.165	1	TAF9	0.743413
SLU7	0.180566	-0.147157	0.173	0.229	1	SLU7	0.743365
ZDHHC12	0.180634	-0.0682609	0.199	0.276	1	ZDHHC12	0.743201
THUMPD2	0.180797	0.0802369	0.128	0.082	1	THUMPD2	0.742808
ALG6	0.181106	-0.0800246	0.064	0.106	1	ALG6	0.742067
POLDIP3	0.181106	-0.0945446	0.064	0.106	1	POLDIP3	0.742067
COL4A3BP	0.181225	0.148533	0.231	0.182	1	COL4A3BP	0.741782
NAA38	0.181755	-0.140124	0.288	0.347	1	NAA38	0.740513
GFM1	0.181958	-0.0909038	0.103	0.153	1	GFM1	0.740028
MRPL44	0.18224	0.129469	0.218	0.165	1	MRPL44	0.739357
CCDC28A	0.182247	0.0860011	0.128	0.082	1	CCDC28A	0.73934
SH2D3C	0.182325	0.0716702	0.115	0.071	1	SH2D3C	0.739154
RAB7A	0.182492	-0.134781	0.282	0.341	1	RAB7A	0.738756
TIMM10	0.182501	0.100077	0.141	0.094	1	TIMM10	0.738734
PIK3CG	0.182531	0.104211	0.16	0.112	1	PIK3CG	0.738663
P4HB	0.182539	0.113055	0.436	0.365	1	P4HB	0.738645
MARS	0.182621	-0.104874	0.103	0.153	1	MARS	0.73845
NUCKS1	0.182654	-0.0593082	0.5	0.541	1	NUCKS1	0.738371
UBE2J1	0.183095	0.078646	0.115	0.071	1	UBE2J1	0.737323
SRFBP1	0.183306	0.0757706	0.218	0.153	1	SRFBP1	0.736824
PTAR1	0.183426	0.122556	0.173	0.124	1	PTAR1	0.736539
RNPC3	0.183551	-0.0814425	0.083	0.129	1	RNPC3	0.736242
TMEM60	0.183651	0.0841656	0.135	0.088	1	TMEM60	0.736008
CREB1	0.1837	-0.16747	0.212	0.259	1	CREB1	0.73589
KRT10	0.183884	0.119304	0.596	0.559	1	KRT10	0.735456
MRPL10	0.184044	0.0887236	0.192	0.135	1	MRPL10	0.735079
PDS5A	0.184126	0.129837	0.199	0.147	1	PDS5A	0.734886
ACTR2	0.184151	-0.0761487	0.59	0.647	1	ACTR2	0.734827
ELP4	0.184437	0.0758527	0.128	0.082	1	ELP4	0.734152
SRP14	0.184677	0.0659469	0.949	0.924	1	SRP14	0.733588
EBLN3P	0.184686	0.13186	0.173	0.124	1	EBLN3P	0.733565
TMEM134	0.184868	-0.103012	0.179	0.241	1	TMEM134	0.733139
TBX21	0.184998	-0.0914482	0.083	0.129	1	TBX21	0.732832
HLA-DPB1	0.185109	0.0830622	0.904	0.853	1	HLA-DPB1	0.732571
LYRM7	0.185319	0.114712	0.173	0.124	1	LYRM7	0.73208
CTDNEP1	0.185347	0.0926981	0.314	0.241	1	CTDNEP1	0.732015
SSRP1	0.185598	0.0941547	0.224	0.165	1	SSRP1	0.731427
CCDC127	0.185908	0.0825726	0.128	0.082	1	CCDC127	0.730702
DGKE	0.185929	-0.128595	0.077	0.118	1	DGKE	0.730652
KLF2	0.186512	-0.24198	0.276	0.335	1	KLF2	0.729293
ZNF524	0.186668	0.0770787	0.192	0.129	1	ZNF524	0.728929
VPS25	0.186812	-0.089355	0.128	0.182	1	VPS25	0.728596
ITGB1	0.187187	-0.0451741	0.385	0.459	1	ITGB1	0.727724
RBM15B	0.187191	-0.109143	0.09	0.135	1	RBM15B	0.727716
TNIP3	0.187207	-0.0890482	0.269	0.335	1	TNIP3	0.727678
ZNF800	0.187234	0.135594	0.333	0.282	1	ZNF800	0.727616
SIN3A	0.187747	-0.089431	0.141	0.194	1	SIN3A	0.726426
ASNA1	0.187839	-0.146173	0.179	0.229	1	ASNA1	0.726215
METTL17	0.18787	0.0908331	0.147	0.1	1	METTL17	0.726142
APOL6	0.187928	0.10067	0.404	0.329	1	APOL6	0.726009
TRIM26	0.188206	-0.095007	0.096	0.141	1	TRIM26	0.725365
EVI2A	0.188484	-0.103101	0.263	0.324	1	EVI2A	0.724725
LCK	0.188591	-0.127434	0.827	0.882	1	LCK	0.724478
KIAA2026	0.189271	0.131853	0.237	0.188	1	KIAA2026	0.722916
ACTA2	0.18939	-0.0893794	0.083	0.129	1	ACTA2	0.722643
S1PR4	0.18939	0.139706	0.59	0.529	1	S1PR4	0.722642
AAMP	0.189394	-0.114696	0.147	0.2	1	AAMP	0.722633
LAMTOR5	0.189407	-0.0534218	0.506	0.612	1	LAMTOR5	0.722604
CCL3	0.189882	-0.0480489	0.09	0.141	1	CCL3	0.721516
PTPMT1	0.190063	-0.105817	0.09	0.135	1	PTPMT1	0.721102
REV3L	0.190105	0.117059	0.244	0.182	1	REV3L	0.721006
TMEM170A	0.190176	-0.15065	0.141	0.194	1	TMEM170A	0.720845
CIRBP	0.190198	-0.0540697	0.564	0.659	1	CIRBP	0.720794
LDHB	0.190219	0.0705602	0.776	0.729	1	LDHB	0.720746
POGLUT1	0.190239	0.0925502	0.141	0.094	1	POGLUT1	0.720701
CYB5R1	0.191331	-0.0996335	0.071	0.112	1	CYB5R1	0.718216
UTRN	0.191335	-0.133873	0.462	0.5	1	UTRN	0.718205
CCNQ	0.192013	-0.123973	0.122	0.165	1	CCNQ	0.716669
ECI1	0.192056	0.0888926	0.147	0.1	1	ECI1	0.716572
DEF6	0.192169	0.0693842	0.365	0.294	1	DEF6	0.716316
NDUFB3	0.192326	0.0713773	0.603	0.524	1	NDUFB3	0.715963
PIGC	0.192475	-0.0812269	0.109	0.159	1	PIGC	0.715625
RPLP1	0.192647	0.0583872	1	1	1	RPLP1	0.715237
CABIN1	0.193131	0.104644	0.244	0.188	1	CABIN1	0.714149
CAT	0.193228	0.0996916	0.167	0.118	1	CAT	0.71393
TMEM161B-AS1	0.193331	0.0556619	0.115	0.071	1	TMEM161B-AS1	0.713699
WDFY1	0.193334	-0.0829729	0.09	0.135	1	WDFY1	0.713693
UBE2D2	0.193672	0.140158	0.583	0.588	1	UBE2D2	0.712934
CDK4	0.193682	-0.109823	0.103	0.147	1	CDK4	0.71291
WDR18	0.193849	-0.116136	0.135	0.182	1	WDR18	0.712536
TMEM109	0.194439	0.0667195	0.25	0.188	1	TMEM109	0.711216
ECHS1	0.194794	0.132608	0.34	0.282	1	ECHS1	0.710425
MAPK1	0.195161	-0.109196	0.25	0.318	1	MAPK1	0.709606
SEC31A	0.195168	-0.110278	0.173	0.229	1	SEC31A	0.709592
MTMR14	0.195231	-0.0995692	0.115	0.165	1	MTMR14	0.709451
PUM1	0.195562	-0.119172	0.186	0.247	1	PUM1	0.708716
LSM7	0.19565	-0.146385	0.538	0.565	1	LSM7	0.708521
SF3B4	0.19566	-0.104826	0.122	0.171	1	SF3B4	0.708499
BRD8	0.195751	0.0607874	0.115	0.071	1	BRD8	0.708295
CDC34	0.19603	-0.0968745	0.096	0.141	1	CDC34	0.707678
ACTR1B	0.196562	-0.097894	0.109	0.159	1	ACTR1B	0.7065
DHX30	0.196592	-0.0793158	0.122	0.176	1	DHX30	0.706434
TMEM141	0.196838	-0.0647172	0.154	0.212	1	TMEM141	0.705891
CAP1	0.196844	-0.121659	0.75	0.759	1	CAP1	0.705879
UBE2W	0.196949	0.0897842	0.154	0.106	1	UBE2W	0.705646
AL359220.1	0.196981	0.133931	0.173	0.124	1	AL359220.1	0.705575
BCL3	0.197162	0.0487764	0.122	0.076	1	BCL3	0.705176
ELOC	0.197207	-0.114835	0.301	0.365	1	ELOC	0.705078
TRAPPC12	0.197604	-0.11478	0.083	0.124	1	TRAPPC12	0.704205
SLC3A2	0.198147	-0.037565	0.346	0.412	1	SLC3A2	0.703012
TNKS2	0.198172	-0.0637993	0.199	0.259	1	TNKS2	0.702957
RNPEPL1	0.198254	0.115195	0.603	0.518	1	RNPEPL1	0.702779
EIF2B4	0.198352	-0.0740934	0.077	0.118	1	EIF2B4	0.702563
FLOT2	0.198352	-0.104694	0.077	0.118	1	FLOT2	0.702563
RAB5C	0.198527	0.124361	0.346	0.276	1	RAB5C	0.70218
LINC00667	0.198566	0.130927	0.179	0.135	1	LINC00667	0.702096
RFK	0.198603	-0.0926251	0.115	0.165	1	RFK	0.702014
AUTS2	0.198603	-0.111028	0.115	0.165	1	AUTS2	0.702014
PHF20L1	0.198789	-0.112939	0.263	0.329	1	PHF20L1	0.701609
UTP18	0.198876	0.11447	0.135	0.094	1	UTP18	0.701418
MSMO1	0.198891	0.131175	0.179	0.135	1	MSMO1	0.701386
SEC22B	0.198913	0.103075	0.282	0.218	1	SEC22B	0.701338
NSMCE4A	0.199116	0.112424	0.218	0.165	1	NSMCE4A	0.700894
HCG18	0.199221	0.126403	0.269	0.212	1	HCG18	0.700666
DRG2	0.199424	-0.0902375	0.071	0.112	1	DRG2	0.700223
JAK1	0.199552	-0.0647301	0.801	0.794	1	JAK1	0.699944
TPST2	0.199586	-0.11534	0.212	0.276	1	TPST2	0.69987
HEXDC	0.199621	-0.111945	0.135	0.188	1	HEXDC	0.699793
CASP1	0.199961	0.113666	0.372	0.306	1	CASP1	0.699055
C14orf119	0.200646	0.13733	0.391	0.335	1	C14orf119	0.697569
MSANTD4	0.200747	-0.128449	0.077	0.118	1	MSANTD4	0.69735
CLPTM1	0.201089	-0.0655868	0.083	0.129	1	CLPTM1	0.696612
ZNF274	0.201553	0.114002	0.186	0.141	1	ZNF274	0.69561
C19orf25	0.201682	-0.0988605	0.301	0.371	1	C19orf25	0.695333
NLRP1	0.201921	0.0975974	0.141	0.094	1	NLRP1	0.694818
STAU2	0.202017	0.100462	0.167	0.118	1	STAU2	0.694611
LINC01871	0.202073	0.114318	0.256	0.2	1	LINC01871	0.694492
SCP2	0.20227	-0.0780617	0.372	0.471	1	SCP2	0.694069
LRBA	0.202376	-0.156398	0.205	0.253	1	LRBA	0.69384
INTS10	0.202993	-0.0336836	0.16	0.229	1	INTS10	0.692518
C6orf47	0.203515	-0.0477276	0.109	0.159	1	C6orf47	0.691404
PLEKHO2	0.203772	0.13226	0.122	0.082	1	PLEKHO2	0.690856
RPS27L	0.203845	0.0761763	0.699	0.659	1	RPS27L	0.690699
PAFAH1B3	0.204028	-0.078792	0.122	0.171	1	PAFAH1B3	0.690311
ANKRD10	0.204368	-0.0891777	0.122	0.171	1	ANKRD10	0.689588
PDE4D	0.204498	-0.0201775	0.173	0.241	1	PDE4D	0.689311
LSM3	0.204607	0.122145	0.365	0.306	1	LSM3	0.68908
PHC3	0.204664	0.130826	0.282	0.218	1	PHC3	0.688958
PLSCR1	0.204817	-0.0904492	0.147	0.2	1	PLSCR1	0.688634
TMEM14C	0.204927	-0.0986837	0.109	0.159	1	TMEM14C	0.688401
MYCBP2	0.204964	-0.0808968	0.519	0.582	1	MYCBP2	0.688323
FUT11	0.205236	-0.141081	0.071	0.112	1	FUT11	0.687746
PPIG	0.205392	0.0980621	0.59	0.482	1	PPIG	0.687417
DIAPH2	0.20543	0.0894269	0.103	0.065	1	DIAPH2	0.687335
DYNLT3	0.205556	-0.0870142	0.141	0.194	1	DYNLT3	0.68707
NUP214	0.205601	-0.0927795	0.077	0.118	1	NUP214	0.686974
CXXC1	0.20599	0.111459	0.16	0.112	1	CXXC1	0.686154
ABCE1	0.206272	0.0786918	0.269	0.206	1	ABCE1	0.685561
CMAS	0.206503	-0.108479	0.109	0.153	1	CMAS	0.685074
PLA2G16	0.206645	-0.134692	0.346	0.406	1	PLA2G16	0.684775
HAT1	0.206941	0.062947	0.237	0.176	1	HAT1	0.684153
AHNAK	0.206956	-0.137122	0.635	0.659	1	AHNAK	0.684122
TTC37	0.207191	-0.1323	0.16	0.212	1	TTC37	0.683629
RBMXL1	0.207213	0.124937	0.135	0.094	1	RBMXL1	0.683583
NARF	0.207541	0.0788939	0.237	0.176	1	NARF	0.682895
ELOVL1	0.207569	0.133867	0.167	0.118	1	ELOVL1	0.682837
RPL27	0.207723	-0.0481559	0.981	1	1	RPL27	0.682516
TACC3	0.207753	-0.11521	0.128	0.176	1	TACC3	0.682452
ARHGEF9	0.207799	0.118598	0.122	0.082	1	ARHGEF9	0.682357
LZIC	0.207825	-0.0928698	0.141	0.194	1	LZIC	0.682302
YTHDC2	0.207971	-0.0973694	0.16	0.218	1	YTHDC2	0.681998
GBP2	0.208144	0.0599047	0.551	0.465	1	GBP2	0.681637
EPN1	0.208407	0.10093	0.154	0.106	1	EPN1	0.681089
C1orf174	0.208481	0.123094	0.173	0.124	1	C1orf174	0.680934
MAPRE2	0.208651	-0.0971198	0.147	0.2	1	MAPRE2	0.68058
SHLD2	0.208756	-0.117501	0.09	0.135	1	SHLD2	0.680361
GPR82	0.208974	0.0867609	0.167	0.118	1	GPR82	0.679907
RTCA	0.208974	-0.111084	0.237	0.288	1	RTCA	0.679907
PSMC4	0.209099	0.125486	0.397	0.335	1	PSMC4	0.679647
HLA-C	0.209426	0.0450272	1	1	1	HLA-C	0.67897
WDR11	0.209562	0.103871	0.199	0.147	1	WDR11	0.678687
PDHB	0.20963	0.106259	0.224	0.165	1	PDHB	0.678547
INPPL1	0.209711	-0.0960935	0.077	0.118	1	INPPL1	0.678379
UBE2H	0.209791	0.125592	0.179	0.129	1	UBE2H	0.678212
ELAVL1	0.209945	0.124814	0.205	0.153	1	ELAVL1	0.677894
NCBP3	0.209988	0.0620782	0.359	0.282	1	NCBP3	0.677805
OASL	0.210128	0.0841395	0.494	0.435	1	OASL	0.677517
PTPN11	0.210136	-0.135923	0.16	0.206	1	PTPN11	0.6775
SLC9A9	0.21028	-0.101235	0.103	0.147	1	SLC9A9	0.677202
ZNF688	0.210561	0.147251	0.218	0.171	1	ZNF688	0.676622
CARD8	0.210723	0.0902338	0.282	0.212	1	CARD8	0.676287
ATIC	0.211345	0.121699	0.154	0.106	1	ATIC	0.675008
DPYD	0.211445	0.0635733	0.128	0.082	1	DPYD	0.674802
METTL9	0.21158	-0.0863366	0.295	0.359	1	METTL9	0.674524
PLEKHB2	0.211822	0.074326	0.212	0.153	1	PLEKHB2	0.674029
SART1	0.212089	0.047822	0.192	0.135	1	SART1	0.673482
HSPD1	0.212133	-0.115363	0.417	0.465	1	HSPD1	0.673391
HIST1H1E	0.212346	0.148359	0.212	0.171	1	HIST1H1E	0.672956
ASH2L	0.212365	0.0903403	0.109	0.071	1	ASH2L	0.672917
ENOPH1	0.212649	0.131758	0.135	0.094	1	ENOPH1	0.672336
CAPZA1	0.212845	0.06907	0.526	0.465	1	CAPZA1	0.671936
GALNT6	0.213041	-0.0865627	0.077	0.118	1	GALNT6	0.671536
POLE4	0.213058	0.092172	0.256	0.2	1	POLE4	0.671502
IL4R	0.213071	0.0663084	0.128	0.082	1	IL4R	0.671477
SUPT6H	0.21332	0.0949608	0.212	0.159	1	SUPT6H	0.670969
TRIM69	0.213379	0.113111	0.231	0.176	1	TRIM69	0.670849
PSMB6	0.2139	0.118361	0.577	0.524	1	PSMB6	0.669789
VPS36	0.213933	-0.146067	0.353	0.394	1	VPS36	0.669723
ZFP36	0.214036	-0.0943864	0.321	0.394	1	ZFP36	0.669513
MED30	0.214108	-0.0866561	0.135	0.188	1	MED30	0.669368
PPP1CC	0.214151	-0.11991	0.218	0.271	1	PPP1CC	0.669281
SFXN3	0.214377	0.0847789	0.103	0.065	1	SFXN3	0.668822
POMP	0.214696	-0.0901233	0.654	0.712	1	POMP	0.668175
RIPOR2	0.214952	0.0570177	0.404	0.324	1	RIPOR2	0.667658
44081	0.214984	-0.0698395	0.942	0.941	1	44081	0.667594
ANAPC11	0.215295	0.099812	0.468	0.406	1	ANAPC11	0.666965
ELP3	0.215485	-0.058438	0.071	0.112	1	ELP3	0.666582
EIF2S1	0.215489	-0.104448	0.25	0.3	1	EIF2S1	0.666574
GNPDA1	0.21553	0.127102	0.147	0.106	1	GNPDA1	0.666492
UPF3A	0.21591	-0.129438	0.244	0.3	1	UPF3A	0.665727
GTF2I	0.216026	-0.0946471	0.391	0.453	1	GTF2I	0.665495
RAB33A	0.216103	0.0631682	0.167	0.118	1	RAB33A	0.665339
BLOC1S4	0.216107	-0.125637	0.263	0.324	1	BLOC1S4	0.66533
UFC1	0.216124	0.10015	0.519	0.447	1	UFC1	0.665297
EDF1	0.216207	0.0917922	0.853	0.765	1	EDF1	0.665131
PPP2R3C	0.21622	0.137716	0.224	0.176	1	PPP2R3C	0.665104
SMIM8	0.21641	-0.0675972	0.077	0.118	1	SMIM8	0.664724
EIF3F	0.216585	0.0737317	0.673	0.618	1	EIF3F	0.664371
FXYD5	0.21677	0.113649	0.647	0.576	1	FXYD5	0.664
BRD1	0.217215	0.0835851	0.16	0.112	1	BRD1	0.66311
SASH3	0.217219	-0.145744	0.359	0.418	1	SASH3	0.663102
PPP1R21	0.217258	-0.0639815	0.077	0.118	1	PPP1R21	0.663025
BAG5	0.217315	0.0584886	0.237	0.176	1	BAG5	0.66291
DBP	0.21736	0.113087	0.128	0.088	1	DBP	0.66282
FBRS	0.217388	0.0852493	0.179	0.129	1	FBRS	0.662764
EIF4EBP2	0.217584	0.0963599	0.16	0.112	1	EIF4EBP2	0.662373
TEFM	0.217637	-0.0970468	0.135	0.182	1	TEFM	0.662267
MTREX	0.2177	0.0534782	0.179	0.124	1	MTREX	0.662142
ZNF264	0.217954	0.0767992	0.16	0.112	1	ZNF264	0.661635
PGGHG	0.218104	-0.0744251	0.071	0.112	1	PGGHG	0.661336
TRAPPC6B	0.218412	-0.139094	0.135	0.176	1	TRAPPC6B	0.660724
SMIM37	0.219016	-0.0968547	0.141	0.188	1	SMIM37	0.659525
PRPF31	0.219266	0.119648	0.301	0.247	1	PRPF31	0.659029
RNF219	0.219391	0.0523413	0.147	0.1	1	RNF219	0.658781
CDC42EP3	0.219676	-0.125725	0.301	0.353	1	CDC42EP3	0.658217
RAPGEF6	0.219816	-0.0991847	0.077	0.118	1	RAPGEF6	0.657941
DDX19B	0.219878	0.0764974	0.103	0.065	1	DDX19B	0.657819
43896	0.220036	0.119959	0.282	0.224	1	43896	0.657507
GPALPP1	0.220105	-0.0635877	0.103	0.147	1	GPALPP1	0.65737
PAIP2	0.220667	-0.0222147	0.538	0.606	1	PAIP2	0.656263
DNAJA1	0.220667	-0.0915156	0.538	0.606	1	DNAJA1	0.656263
AL355816.2	0.220804	0.0753575	0.103	0.065	1	AL355816.2	0.655993
IL2RG	0.22092	-0.0707842	0.635	0.659	1	IL2RG	0.655765
MAD2L2	0.221242	0.115386	0.154	0.112	1	MAD2L2	0.655132
CHMP1A	0.22134	0.0728356	0.244	0.182	1	CHMP1A	0.654939
MRPL22	0.221487	-0.0756436	0.224	0.282	1	MRPL22	0.654652
GALNT11	0.22159	0.133983	0.224	0.176	1	GALNT11	0.654451
SEC63	0.221821	-0.0564182	0.141	0.194	1	SEC63	0.653998
GFER	0.221931	-0.0732363	0.115	0.165	1	GFER	0.653783
CWC27	0.22196	0.092597	0.224	0.171	1	CWC27	0.653725
SPTLC2	0.222027	0.101175	0.16	0.118	1	SPTLC2	0.653595
PRMT9	0.222075	0.0258113	0.115	0.071	1	PRMT9	0.6535
PHF19	0.222096	-0.0977203	0.141	0.188	1	PHF19	0.653459
RPS6KA3	0.222367	0.106371	0.282	0.224	1	RPS6KA3	0.65293
UGCG	0.22277	-0.104924	0.115	0.159	1	UGCG	0.652143
NCOA2	0.222773	0.105142	0.122	0.082	1	NCOA2	0.652138
RGS14	0.222788	0.109933	0.237	0.182	1	RGS14	0.652107
[truncated: 3,589 more rows]

## Sheet: S1E-C1 PD-L1 vs. Bispecific
Table S1E: Differential Expression of Cluster 1 CD8 T cells PD-L1 vs. Bispecific
[truncated: 4,874 more rows]

[truncated: 5 more sheets: S1F-C13 IgG vs. PD-1, S1G-C13 IgG vs. PD-L1, S1H-C13 IgG vs. Bispecific, S1I-C13 PD-1 vs. Bispecific, S1J-C14 PD-L1 vs. Bispecific]
