# Supplementary material for: Enhanced Efficacy of Simultaneous PD-1 and PD-L1 Immune Checkpoint Blockade in High-Grade Serous Ovarian Cancer
Source: Oxford University Press journal article supplement (doi:10.1158/0008-5472.can-20-1674), 2020-11-06
Supplement: 00085472can201674-sup-243610_2_supp_6692631_qj3dcj.xlsx [file 00085472can201674-sup-243610_2_supp_6692631_qj3dcj.xlsx]

## Sheet: S2A-C4 PD-1 vs. IgG
Table S2A: Differential Expression Analysis CD4 Tregs cluster 4 anti-PD-1 vs. IgG
	p_val	avg_logFC	pct.1	pct.2	p_val_adj	Gene_ID	logP
WDR55	0.000116613	0.214713	0.21	0.07	1	WDR55	3.93325
DLG1	0.00024768	0.230039	0.312	0.139	1	DLG1	3.60611
IRF9	0.000336559	0.268705	0.406	0.225	1	IRF9	3.47294
LAMP1	0.000742142	0.24258	0.464	0.289	1	LAMP1	3.12951
AURKAIP1	0.000943582	0.240081	0.761	0.668	1	AURKAIP1	3.02522
MYBL1	0.000976837	-0.157952	0.036	0.15	1	MYBL1	3.01018
ELP2	0.00117844	0.259338	0.319	0.182	1	ELP2	2.92869
MLF2	0.0012416	-0.218562	0.188	0.348	1	MLF2	2.90602
SHLD1	0.00147506	0.18619	0.181	0.07	1	SHLD1	2.83119
MIR29B2CHG	0.00151573	0.148987	0.152	0.048	1	MIR29B2CHG	2.81938
ZBTB1	0.00170727	-0.210445	0.254	0.422	1	ZBTB1	2.7677
TMEM181	0.00178826	-0.188828	0.08	0.203	1	TMEM181	2.74757
NFS1	0.00188117	0.129946	0.13	0.037	1	NFS1	2.72557
ZNF408	0.00188254	-0.133923	0.029	0.128	1	ZNF408	2.72525
CCND2	0.00199156	-0.183058	0.551	0.69	1	CCND2	2.70081
PACS1	0.00201971	0.237674	0.399	0.246	1	PACS1	2.69471
RSAD1	0.00206005	0.148861	0.167	0.059	1	RSAD1	2.68612
OSGIN2	0.00208453	-0.135117	0.022	0.112	1	OSGIN2	2.68099
FANCA	0.00208453	-0.136039	0.022	0.112	1	FANCA	2.68099
SMARCAD1	0.00218616	0.183463	0.203	0.086	1	SMARCAD1	2.66032
RAB4A	0.00220076	0.232926	0.326	0.193	1	RAB4A	2.65743
FBXO8	0.00223786	-0.156682	0.043	0.15	1	FBXO8	2.65017
AC078883.3	0.00261316	-0.16521	0.036	0.134	1	AC078883.3	2.58283
SDR39U1	0.00288301	-0.125818	0.051	0.16	1	SDR39U1	2.54015
MBOAT1	0.00295823	0.0954523	0.109	0.027	1	MBOAT1	2.52897
PIGS	0.0030672	0.182572	0.167	0.064	1	PIGS	2.51326
ZDHHC3	0.00315307	-0.174609	0.094	0.219	1	ZDHHC3	2.50127
PDP1	0.00317047	0.232716	0.174	0.07	1	PDP1	2.49888
IBTK	0.00327572	0.19275	0.326	0.187	1	IBTK	2.48469
ISG15	0.00342537	0.32774	0.783	0.674	1	ISG15	2.46529
SMC1A	0.00345797	0.174838	0.457	0.316	1	SMC1A	2.46118
GBP4	0.00358732	0.203702	0.587	0.439	1	GBP4	2.44523
CUEDC2	0.00365648	-0.222048	0.174	0.31	1	CUEDC2	2.43694
PREX1	0.00370597	-0.222839	0.312	0.46	1	PREX1	2.4311
C5orf24	0.00373038	0.166197	0.283	0.144	1	C5orf24	2.42825
ARL6IP6	0.0039932	-0.157206	0.109	0.235	1	ARL6IP6	2.39868
ZDHHC5	0.00401744	0.15794	0.217	0.102	1	ZDHHC5	2.39605
SPTBN1	0.00416451	0.281649	0.449	0.321	1	SPTBN1	2.38044
RAB2A	0.00417277	0.227912	0.536	0.406	1	RAB2A	2.37958
ZNF43	0.00446764	0.209806	0.159	0.064	1	ZNF43	2.34992
NUP37	0.00486749	-0.146751	0.072	0.182	1	NUP37	2.3127
COPS4	0.00487572	-0.188933	0.13	0.257	1	COPS4	2.31196
IDI1	0.00491103	0.157041	0.514	0.358	1	IDI1	2.30883
GORASP2	0.00500272	0.187778	0.232	0.118	1	GORASP2	2.30079
PCNT	0.00512086	-0.143716	0.065	0.171	1	PCNT	2.29066
TP53TG1	0.00513604	0.149369	0.254	0.134	1	TP53TG1	2.28937
PDIA4	0.00530845	0.167504	0.246	0.123	1	PDIA4	2.27503
SPAG7	0.00541364	0.188003	0.442	0.305	1	SPAG7	2.26651
PIGM	0.00543624	-0.101518	0.036	0.128	1	PIGM	2.2647
CD55	0.00547624	-0.231426	0.239	0.369	1	CD55	2.26152
TMEM30A	0.00548046	0.189077	0.268	0.15	1	TMEM30A	2.26118
DNAJB6	0.00548411	0.192818	0.63	0.535	1	DNAJB6	2.26089
RAB11FIP1	0.00553642	-0.245232	0.449	0.572	1	RAB11FIP1	2.25677
DAXX	0.00581184	0.222678	0.319	0.198	1	DAXX	2.23569
DGKZ	0.00593782	0.209015	0.58	0.46	1	DGKZ	2.22637
SLC26A4-AS1	0.00607135	-0.129562	0.029	0.112	1	SLC26A4-AS1	2.21672
TNFSF10	0.00635309	0.189776	0.42	0.273	1	TNFSF10	2.19701
PRAF2	0.00653588	-0.128411	0.043	0.134	1	PRAF2	2.1847
PLEKHO2	0.00672352	-0.130975	0.043	0.134	1	PLEKHO2	2.1724
MT-CO1	0.00688919	-0.0904878	0.993	1	1	MT-CO1	2.16183
SAFB	0.00700829	0.233733	0.457	0.348	1	SAFB	2.15439
TP53I13	0.00731951	-0.159217	0.101	0.209	1	TP53I13	2.13552
YTHDF3	0.00758563	-0.132458	0.051	0.144	1	YTHDF3	2.12001
UBE2W	0.00761811	0.169715	0.254	0.139	1	UBE2W	2.11815
ZMYM2	0.00794523	0.175121	0.304	0.176	1	ZMYM2	2.09989
PPP6C	0.00819344	-0.170259	0.13	0.251	1	PPP6C	2.08653
UPP1	0.00821444	-0.217032	0.58	0.695	1	UPP1	2.08542
CYTOR	0.00842088	0.230828	0.797	0.69	1	CYTOR	2.07464
SLC39A8	0.00844544	-0.149892	0.058	0.15	1	SLC39A8	2.07338
USP8	0.00852238	0.259427	0.493	0.369	1	USP8	2.06944
NUDCD3	0.00854677	0.18338	0.188	0.091	1	NUDCD3	2.0682
C17orf75	0.00857085	0.123792	0.13	0.048	1	C17orf75	2.06698
TMX4	0.00857165	0.194927	0.486	0.353	1	TMX4	2.06694
CRK	0.00862871	0.164464	0.21	0.107	1	CRK	2.06405
HERPUD2	0.00868391	-0.15547	0.094	0.203	1	HERPUD2	2.06128
RPL18	0.00875342	-0.0606257	1	0.995	1	RPL18	2.05782
USP36	0.0087815	0.146516	0.167	0.075	1	USP36	2.05643
DPYSL2	0.00885712	-0.0971836	0.101	0.219	1	DPYSL2	2.05271
VDAC2	0.00898623	-0.150145	0.529	0.658	1	VDAC2	2.04642
P4HTM	0.00928213	0.163957	0.21	0.107	1	P4HTM	2.03235
ZNF33A	0.0093131	-0.214964	0.174	0.294	1	ZNF33A	2.03091
CIC	0.00932599	0.143259	0.152	0.064	1	CIC	2.03031
LYSMD2	0.00958699	-0.156262	0.283	0.428	1	LYSMD2	2.01832
GABPB1-AS1	0.0098926	-0.233444	0.428	0.529	1	GABPB1-AS1	2.00469
NEMF	0.00991492	-0.182812	0.355	0.497	1	NEMF	2.00371
MLYCD	0.00995001	-0.0992575	0.036	0.118	1	MLYCD	2.00218
ZNF592	0.0101012	-0.125486	0.058	0.15	1	ZNF592	1.99563
PRPF19	0.0101653	-0.135839	0.058	0.15	1	PRPF19	1.99288
CBLL1	0.0102281	-0.187114	0.159	0.273	1	CBLL1	1.9902
SNRPE	0.0102713	0.195404	0.58	0.444	1	SNRPE	1.98837
CUL5	0.0102904	0.157036	0.29	0.171	1	CUL5	1.98757
ITK	0.0105338	0.199487	0.471	0.332	1	ITK	1.97741
BORCS8	0.0105967	-0.156711	0.094	0.198	1	BORCS8	1.97483
GPALPP1	0.0106279	0.187079	0.232	0.128	1	GPALPP1	1.97355
SNF8	0.0106556	0.154375	0.536	0.385	1	SNF8	1.97242
PTP4A2	0.0106669	0.163797	0.819	0.781	1	PTP4A2	1.97196
PDK2	0.0107804	0.108889	0.152	0.064	1	PDK2	1.96737
UBFD1	0.010797	0.115617	0.109	0.037	1	UBFD1	1.9667
IKZF3	0.010799	0.194074	0.536	0.444	1	IKZF3	1.96662
ATP6AP1	0.0108772	0.148977	0.268	0.155	1	ATP6AP1	1.96348
LETM1	0.0109922	0.16541	0.196	0.102	1	LETM1	1.95892
GOLGA5	0.0111118	0.113911	0.145	0.059	1	GOLGA5	1.95422
HARS	0.0114829	-0.176417	0.21	0.332	1	HARS	1.93995
SLC1A5	0.0115131	-0.141519	0.065	0.155	1	SLC1A5	1.93881
MALSU1	0.0115697	-0.109549	0.181	0.31	1	MALSU1	1.93668
COX17	0.0115717	0.196949	0.572	0.492	1	COX17	1.9366
XAB2	0.0116729	0.13023	0.181	0.086	1	XAB2	1.93282
ZC3H10	0.0118651	0.0935226	0.101	0.032	1	ZC3H10	1.92573
LIMS1	0.0120144	0.173767	0.623	0.503	1	LIMS1	1.9203
RHOF	0.0120305	0.158282	0.543	0.422	1	RHOF	1.91972
NDUFA8	0.0122246	0.164607	0.348	0.225	1	NDUFA8	1.91277
CCNY	0.0123163	-0.156239	0.145	0.262	1	CCNY	1.90952
INO80D	0.0124929	-0.13808	0.138	0.257	1	INO80D	1.90334
NDUFS3	0.0125483	0.159969	0.399	0.267	1	NDUFS3	1.90141
LFNG	0.0128411	-0.248165	0.268	0.396	1	LFNG	1.8914
XPO6	0.0132911	0.191565	0.196	0.107	1	XPO6	1.87644
BAG1	0.0135126	0.157761	0.457	0.326	1	BAG1	1.86926
BCKDHB	0.0139415	0.161458	0.123	0.048	1	BCKDHB	1.85569
KIAA1328	0.0143408	0.102388	0.123	0.048	1	KIAA1328	1.84343
LRPPRC	0.0147001	0.140333	0.21	0.112	1	LRPPRC	1.83268
SPPL2A	0.0147762	0.201214	0.37	0.267	1	SPPL2A	1.83044
SLC35C2	0.0149898	0.161094	0.275	0.171	1	SLC35C2	1.8242
ABRAXAS2	0.0152372	0.164574	0.174	0.086	1	ABRAXAS2	1.81709
BTBD10	0.0153125	0.147394	0.152	0.07	1	BTBD10	1.81495
NMT2	0.0153125	0.144513	0.152	0.07	1	NMT2	1.81495
MORN3	0.0153224	0.0944692	0.116	0.043	1	MORN3	1.81467
TCTEX1D2	0.0153511	0.136213	0.167	0.08	1	TCTEX1D2	1.81386
MGA	0.0153525	0.149938	0.246	0.144	1	MGA	1.81382
ARPC5	0.0154457	0.140347	0.841	0.749	1	ARPC5	1.81119
RABL2B	0.0154646	-0.113375	0.043	0.123	1	RABL2B	1.81066
SACS	0.0154647	-0.196441	0.159	0.267	1	SACS	1.81066
EHD4	0.0156802	0.132717	0.225	0.123	1	EHD4	1.80465
TRBC1	0.0158263	-0.179888	0.623	0.781	1	TRBC1	1.80062
PIK3C3	0.0158433	0.171839	0.254	0.155	1	PIK3C3	1.80015
CYSLTR1	0.01597	-0.162133	0.08	0.171	1	CYSLTR1	1.7967
SPOUT1	0.0160782	-0.106996	0.058	0.144	1	SPOUT1	1.79376
AC093010.2	0.0162363	0.128679	0.159	0.075	1	AC093010.2	1.78951
RNF114	0.0163392	-0.093879	0.174	0.305	1	RNF114	1.78677
ABR	0.0164153	-0.14639	0.065	0.15	1	ABR	1.78475
MCM5	0.0165356	0.106205	0.145	0.064	1	MCM5	1.78158
MPND	0.0167251	-0.128403	0.051	0.128	1	MPND	1.77663
DEK	0.0167776	0.143951	0.804	0.722	1	DEK	1.77527
PPP1R21	0.016851	-0.0975975	0.051	0.134	1	PPP1R21	1.77338
PSMB10	0.0168593	-0.0814817	0.159	0.278	1	PSMB10	1.77316
MRPS16	0.0169063	0.162474	0.413	0.299	1	MRPS16	1.77195
ACVR1	0.0170071	-0.129213	0.065	0.15	1	ACVR1	1.76937
CSTB	0.0171731	0.210848	0.826	0.77	1	CSTB	1.76515
DALRD3	0.0171829	0.156278	0.21	0.118	1	DALRD3	1.7649
LIN7C	0.0172062	0.133783	0.232	0.128	1	LIN7C	1.76431
MVP	0.0172172	-0.159702	0.399	0.529	1	MVP	1.76404
GMFB	0.017227	-0.123248	0.101	0.198	1	GMFB	1.76379
RIC8B	0.0173463	-0.116062	0.043	0.118	1	RIC8B	1.76079
ELMO1	0.0173894	0.16598	0.246	0.144	1	ELMO1	1.75972
SUMO1	0.0174296	0.121694	0.79	0.69	1	SUMO1	1.75871
SMIM8	0.0176736	0.159266	0.196	0.107	1	SMIM8	1.75267
CBWD5	0.017765	0.105013	0.167	0.08	1	CBWD5	1.75043
RFX7	0.017937	-0.124651	0.051	0.128	1	RFX7	1.74625
PIGN	0.0180758	0.107678	0.101	0.037	1	PIGN	1.7429
TRPV2	0.0181383	0.128401	0.239	0.134	1	TRPV2	1.7414
LRRC8A	0.0181408	-0.13228	0.065	0.15	1	LRRC8A	1.74134
SELENOT	0.0182978	-0.139816	0.449	0.604	1	SELENOT	1.7376
ECHDC1	0.0184354	0.131164	0.355	0.235	1	ECHDC1	1.73435
PTAR1	0.0189814	-0.147571	0.087	0.182	1	PTAR1	1.72167
GMPR2	0.0190643	0.167543	0.304	0.203	1	GMPR2	1.71978
SPTLC1	0.0190701	-0.127059	0.109	0.214	1	SPTLC1	1.71965
SDF4	0.0192326	-0.165985	0.232	0.353	1	SDF4	1.71596
CAMTA1	0.0193203	-0.135477	0.152	0.267	1	CAMTA1	1.71399
RPS13	0.0193622	-0.100498	0.993	1	1	RPS13	1.71305
COX6C	0.0193862	0.171336	0.862	0.877	1	COX6C	1.71251
PRPF38A	0.0194923	-0.161453	0.217	0.321	1	PRPF38A	1.71014
PHLDA3	0.0195857	-0.119705	0.036	0.107	1	PHLDA3	1.70806
FAM129B	0.0199255	-0.108265	0.043	0.118	1	FAM129B	1.70059
H2AFX	0.0201485	-0.142724	0.094	0.182	1	H2AFX	1.69576
TRMU	0.0208564	0.109493	0.123	0.053	1	TRMU	1.68076
HNRNPAB	0.021085	0.199821	0.37	0.278	1	HNRNPAB	1.67603
PIP5K1C	0.0211114	-0.106264	0.051	0.128	1	PIP5K1C	1.67548
LSG1	0.0212942	-0.14969	0.065	0.144	1	LSG1	1.67174
PTPN7	0.0214562	-0.194994	0.63	0.695	1	PTPN7	1.66845
CHRAC1	0.0215275	0.10702	0.196	0.102	1	CHRAC1	1.66701
EXOC3	0.021799	-0.164256	0.08	0.166	1	EXOC3	1.66156
MARCKSL1	0.0218765	-0.165595	0.087	0.171	1	MARCKSL1	1.66002
MPRIP	0.0218828	0.163758	0.428	0.305	1	MPRIP	1.6599
RGP1	0.0219664	0.16562	0.254	0.16	1	RGP1	1.65824
IFFO2	0.0221149	0.0932519	0.101	0.037	1	IFFO2	1.65532
EPSTI1	0.0222781	0.169149	0.529	0.422	1	EPSTI1	1.65212
CEP97	0.0224305	-0.144463	0.065	0.144	1	CEP97	1.64916
ARF4	0.02266	-0.128735	0.283	0.428	1	ARF4	1.64474
GPCPD1	0.0227689	0.123593	0.152	0.075	1	GPCPD1	1.64266
PYROXD1	0.0228111	0.12496	0.268	0.16	1	PYROXD1	1.64185
PDCD5	0.0231855	0.149442	0.601	0.471	1	PDCD5	1.63478
MRPL22	0.0232017	0.167328	0.355	0.257	1	MRPL22	1.63448
LTV1	0.0232912	0.128116	0.203	0.112	1	LTV1	1.63281
SUSD6	0.0233346	0.136247	0.217	0.123	1	SUSD6	1.632
DCTN3	0.0234021	-0.191546	0.435	0.513	1	DCTN3	1.63074
GRB2	0.0234863	-0.12165	0.442	0.583	1	GRB2	1.62919
UBL5	0.0235213	-0.161506	0.783	0.861	1	UBL5	1.62854
PECR	0.0235621	0.141436	0.159	0.08	1	PECR	1.62779
DGCR8	0.0238822	-0.123462	0.08	0.166	1	DGCR8	1.62193
PFDN2	0.0239595	-0.136546	0.507	0.652	1	PFDN2	1.62052
BST2	0.0241413	0.163833	0.681	0.567	1	BST2	1.61724
TMEM156	0.0242555	0.131722	0.217	0.123	1	TMEM156	1.61519
ATP6V0A1	0.0242981	0.123083	0.145	0.07	1	ATP6V0A1	1.61443
RNF157	0.0243971	-0.1133	0.036	0.102	1	RNF157	1.61266
SYT11	0.0246184	0.125896	0.181	0.096	1	SYT11	1.60874
NIFK-AS1	0.024668	0.121937	0.203	0.112	1	NIFK-AS1	1.60787
BTG2	0.0249092	0.108934	0.674	0.578	1	BTG2	1.60364
CDC42SE1	0.025079	-0.126517	0.558	0.642	1	CDC42SE1	1.60069
RELA	0.0251788	-0.110192	0.188	0.31	1	RELA	1.59897
OSGEP	0.0252735	0.118711	0.181	0.096	1	OSGEP	1.59734
ABI1	0.025442	-0.151026	0.254	0.374	1	ABI1	1.59445
RGS1	0.0254591	0.208876	0.471	0.348	1	RGS1	1.59416
APEX1	0.0254642	-0.131327	0.246	0.385	1	APEX1	1.59407
SELENOS	0.0256223	-0.146301	0.261	0.38	1	SELENOS	1.59138
CCR6	0.025639	-0.191951	0.159	0.257	1	CCR6	1.5911
ZNF397	0.0256401	0.134677	0.225	0.134	1	ZNF397	1.59108
PPIA	0.0256914	0.152707	0.949	0.909	1	PPIA	1.59021
ZNF335	0.0260319	0.103739	0.123	0.053	1	ZNF335	1.58449
AFF4	0.0260356	0.185005	0.261	0.176	1	AFF4	1.58443
SUMF2	0.0262669	-0.187856	0.196	0.294	1	SUMF2	1.58059
TXLNG	0.0263	0.148477	0.188	0.107	1	TXLNG	1.58004
PPP2R1B	0.0263089	0.117781	0.138	0.064	1	PPP2R1B	1.5799
TMEM245	0.0263356	0.143315	0.239	0.144	1	TMEM245	1.57946
WDR6	0.0265042	-0.140469	0.101	0.187	1	WDR6	1.57669
NAGA	0.0265378	0.104182	0.123	0.053	1	NAGA	1.57614
EIF3E	0.0265866	-0.125444	0.841	0.904	1	EIF3E	1.57534
NME6	0.026635	0.117348	0.203	0.112	1	NME6	1.57455
RNASEL	0.0267244	-0.118067	0.051	0.123	1	RNASEL	1.57309
WBP1L	0.0270146	-0.100664	0.036	0.102	1	WBP1L	1.5684
BCAS4	0.0270232	0.091066	0.13	0.059	1	BCAS4	1.56826
CREB3	0.0270864	0.113654	0.174	0.091	1	CREB3	1.56725
SLC16A1-AS1	0.0272906	-0.162743	0.174	0.278	1	SLC16A1-AS1	1.56399
EVI2B	0.0274278	0.137268	0.572	0.433	1	EVI2B	1.56181
ITGA5	0.0276037	0.100546	0.138	0.064	1	ITGA5	1.55903
TOR2A	0.0278349	-0.130494	0.065	0.139	1	TOR2A	1.55541
MED16	0.0279612	0.12481	0.283	0.176	1	MED16	1.55344
TUBD1	0.0280516	0.114014	0.167	0.086	1	TUBD1	1.55204
CYBA	0.0282376	0.104377	0.993	1	1	CYBA	1.54917
RPL3	0.0282805	-0.102229	1	1	1	RPL3	1.54851
AHCYL1	0.0283064	-0.145629	0.196	0.299	1	AHCYL1	1.54811
CTDP1	0.0283731	-0.12969	0.087	0.171	1	CTDP1	1.54709
CHM	0.0284536	-0.0923373	0.087	0.176	1	CHM	1.54586
TMEM9B	0.0285422	-0.141115	0.312	0.433	1	TMEM9B	1.54451
MAD2L1	0.0286157	-0.122886	0.065	0.144	1	MAD2L1	1.5434
CMTM6	0.02882	0.147934	0.819	0.765	1	CMTM6	1.54031
CTR9	0.0295069	0.119974	0.319	0.209	1	CTR9	1.53008
SEC11A	0.02981	0.162946	0.71	0.626	1	SEC11A	1.52564
TBCC	0.030038	0.122319	0.449	0.342	1	TBCC	1.52233
CNOT10	0.0301595	-0.111262	0.087	0.171	1	CNOT10	1.52058
FXYD1	0.0303268	0.121989	0.145	0.07	1	FXYD1	1.51817
TNK2	0.0306775	0.132877	0.138	0.07	1	TNK2	1.51318
AGTRAP	0.0314799	-0.159669	0.152	0.251	1	AGTRAP	1.50197
ATP6V1F	0.0317455	0.120362	0.659	0.578	1	ATP6V1F	1.49832
SHARPIN	0.0322964	0.168222	0.246	0.16	1	SHARPIN	1.49085
VPS26C	0.0323597	-0.129165	0.109	0.198	1	VPS26C	1.49
ISOC1	0.0324069	0.185112	0.145	0.075	1	ISOC1	1.48936
CLTB	0.032532	-0.153944	0.399	0.524	1	CLTB	1.48769
HLA-B	0.0327244	0.0883356	0.993	1	1	HLA-B	1.48513
ETF1	0.0327308	0.13819	0.225	0.139	1	ETF1	1.48504
CTNNA1	0.0328158	-0.136235	0.101	0.187	1	CTNNA1	1.48392
ARF6	0.0329926	0.139141	0.667	0.535	1	ARF6	1.48158
GNL3L	0.0330669	-0.105424	0.043	0.107	1	GNL3L	1.48061
ELP4	0.0330729	-0.131004	0.058	0.128	1	ELP4	1.48053
JUND	0.0331344	-0.162276	0.862	0.904	1	JUND	1.47972
JUN	0.0333533	0.121086	0.471	0.348	1	JUN	1.47686
TSPAN32	0.0335499	-0.155765	0.051	0.118	1	TSPAN32	1.47431
SRRD	0.0340662	-0.111518	0.094	0.176	1	SRRD	1.46768
COA3	0.034087	0.130185	0.362	0.262	1	COA3	1.46741
SLC41A1	0.0341263	-0.118017	0.043	0.107	1	SLC41A1	1.46691
CBR1	0.0341944	-0.143868	0.152	0.246	1	CBR1	1.46605
TRIM21	0.0344817	-0.137518	0.109	0.187	1	TRIM21	1.46241
NPEPL1	0.0347758	-0.105395	0.043	0.107	1	NPEPL1	1.45872
INTS12	0.0347767	-0.117759	0.051	0.118	1	INTS12	1.45871
SMURF2	0.0349946	-0.118957	0.043	0.107	1	SMURF2	1.456
SDHB	0.0350732	-0.154901	0.203	0.299	1	SDHB	1.45502
DOK2	0.0351189	0.139041	0.732	0.69	1	DOK2	1.45446
IL18R1	0.0351428	-0.134927	0.174	0.278	1	IL18R1	1.45416
MARK4	0.0352993	0.105846	0.101	0.043	1	MARK4	1.45223
C19orf24	0.0353568	-0.120871	0.377	0.492	1	C19orf24	1.45153
TIAM1	0.03544	0.158008	0.174	0.096	1	TIAM1	1.45051
DDB2	0.035482	-0.129085	0.29	0.406	1	DDB2	1.44999
LINC00243	0.0355388	0.107054	0.101	0.043	1	LINC00243	1.4493
ZNF568	0.0356695	0.117054	0.109	0.048	1	ZNF568	1.4477
RPUSD4	0.0357796	0.0955158	0.101	0.043	1	RPUSD4	1.44636
WAC-AS1	0.0361842	0.145714	0.29	0.198	1	WAC-AS1	1.44148
SDE2	0.0362393	-0.121954	0.058	0.128	1	SDE2	1.44082
MT-ND4L	0.0363327	-0.150624	0.435	0.551	1	MT-ND4L	1.4397
EXOC7	0.0364816	-0.135535	0.188	0.289	1	EXOC7	1.43793
MRPL11	0.0364967	0.16974	0.384	0.294	1	MRPL11	1.43775
KCTD18	0.0365106	0.0773434	0.101	0.043	1	KCTD18	1.43758
TBCD	0.0366599	0.0937007	0.188	0.102	1	TBCD	1.43581
INPP5D	0.0366635	-0.130276	0.254	0.38	1	INPP5D	1.43577
PHKB	0.0369154	0.160833	0.391	0.294	1	PHKB	1.43279
FBXO31	0.0372542	0.156074	0.101	0.043	1	FBXO31	1.42883
ZNF587	0.0372542	0.0885009	0.101	0.043	1	ZNF587	1.42883
SELENOF	0.0375881	0.155766	0.609	0.503	1	SELENOF	1.42495
PPHLN1	0.0376092	-0.157418	0.478	0.567	1	PPHLN1	1.42471
LNPK	0.0377134	-0.0899279	0.043	0.107	1	LNPK	1.4235
SLAIN1	0.037757	0.0838082	0.101	0.043	1	SLAIN1	1.423
ATM	0.0378028	0.105141	0.659	0.535	1	ATM	1.42248
RPL35A	0.0380848	-0.0897583	1	1	1	RPL35A	1.41925
VAMP4	0.038124	-0.140113	0.196	0.294	1	VAMP4	1.4188
ANAPC1	0.0383466	0.109516	0.138	0.07	1	ANAPC1	1.41627
TAB2	0.0384597	-0.173226	0.283	0.385	1	TAB2	1.41499
UBAP2L	0.0385624	-0.118534	0.109	0.198	1	UBAP2L	1.41384
LAMTOR1	0.038645	0.179085	0.536	0.455	1	LAMTOR1	1.41291
ACAA2	0.0391732	-0.0622874	0.304	0.417	1	ACAA2	1.40701
KIAA1468	0.0393567	-0.109612	0.08	0.155	1	KIAA1468	1.40498
ALKBH4	0.03961	0.101933	0.123	0.059	1	ALKBH4	1.40219
KIF5B	0.0396858	-0.132138	0.464	0.578	1	KIF5B	1.40136
SLC9A3R1	0.0398318	0.113783	0.522	0.422	1	SLC9A3R1	1.39977
MYH9	0.0398525	0.101728	0.812	0.706	1	MYH9	1.39954
DGCR2	0.0398686	-0.0946036	0.043	0.107	1	DGCR2	1.39937
ZMYM5	0.0400025	0.126124	0.246	0.155	1	ZMYM5	1.39791
FAM3A	0.0400743	-0.0451148	0.051	0.118	1	FAM3A	1.39713
MID1IP1	0.0400743	-0.0881953	0.051	0.118	1	MID1IP1	1.39713
NLRC3	0.0405444	-0.123242	0.181	0.283	1	NLRC3	1.39207
TMA7	0.0409731	0.118906	0.949	0.92	1	TMA7	1.3875
LY9	0.0410121	0.0915784	0.138	0.07	1	LY9	1.38709
NDUFS2	0.0410617	0.170582	0.478	0.385	1	NDUFS2	1.38656
SELENOK	0.0410691	-0.145758	0.522	0.652	1	SELENOK	1.38648
FBXO38	0.0411684	0.0679276	0.101	0.043	1	FBXO38	1.38544
DYRK2	0.0412758	-0.171796	0.312	0.422	1	DYRK2	1.3843
KXD1	0.0413231	-0.12765	0.159	0.262	1	KXD1	1.38381
STAT1	0.0413902	0.221295	0.594	0.519	1	STAT1	1.3831
NDUFC2	0.0416239	-0.142813	0.696	0.775	1	NDUFC2	1.38066
S1PR4	0.0419533	-0.131478	0.884	0.936	1	S1PR4	1.37723
UROD	0.0422634	-0.0887711	0.065	0.139	1	UROD	1.37404
HAUS6	0.0423405	0.107579	0.159	0.086	1	HAUS6	1.37324
AK9	0.042385	0.0809593	0.116	0.053	1	AK9	1.37279
VPS13A	0.0424418	0.176423	0.29	0.198	1	VPS13A	1.37221
BABAM1	0.0426213	-0.155122	0.232	0.321	1	BABAM1	1.37037
CASC4	0.0429186	0.174119	0.275	0.187	1	CASC4	1.36735
SURF6	0.0429703	-0.0765504	0.051	0.118	1	SURF6	1.36683
S1PR1	0.0431001	0.0839447	0.268	0.171	1	S1PR1	1.36552
CAPZA1	0.0432396	-0.119125	0.558	0.695	1	CAPZA1	1.36412
FDX1	0.0433646	0.135417	0.435	0.326	1	FDX1	1.36286
ZNF800	0.0435021	0.127547	0.355	0.262	1	ZNF800	1.36149
PLEKHO1	0.0435864	-0.144638	0.348	0.465	1	PLEKHO1	1.36065
PFN1	0.0438607	-0.11307	0.986	0.995	1	PFN1	1.35792
RPUSD2	0.0440357	0.0777145	0.109	0.048	1	RPUSD2	1.3562
GRIPAP1	0.0441062	-0.103824	0.188	0.278	1	GRIPAP1	1.3555
LDHA	0.0441892	0.0907958	0.92	0.882	1	LDHA	1.35468
BLMH	0.0445746	-0.0950278	0.072	0.144	1	BLMH	1.35091
WDR13	0.0445746	-0.102552	0.072	0.144	1	WDR13	1.35091
SRSF4	0.044962	-0.133992	0.551	0.668	1	SRSF4	1.34715
HIGD1A	0.0451344	0.155329	0.297	0.214	1	HIGD1A	1.34549
TTI1	0.0452566	-0.0836088	0.051	0.118	1	TTI1	1.34432
MIA3	0.0454982	-0.181529	0.275	0.38	1	MIA3	1.34201
PDE12	0.0457478	-0.0889223	0.109	0.198	1	PDE12	1.33963
POMC	0.0460088	0.0556402	0.109	0.048	1	POMC	1.33716
IVD	0.0460131	0.0772655	0.181	0.102	1	IVD	1.33712
CA11	0.0461222	-0.106185	0.043	0.102	1	CA11	1.33609
ALG13	0.0464144	0.138606	0.304	0.209	1	ALG13	1.33335
TMED5	0.0468923	-0.127492	0.196	0.299	1	TMED5	1.3289
CEBPZ	0.046965	-0.164766	0.217	0.31	1	CEBPZ	1.32823
TRIM33	0.0469813	0.094446	0.304	0.203	1	TRIM33	1.32808
TUBA1B	0.0470228	0.177407	0.587	0.481	1	TUBA1B	1.32769
RBM17	0.047041	0.163129	0.442	0.358	1	RBM17	1.32752
NENF	0.0474397	0.140331	0.246	0.166	1	NENF	1.32386
RUBCN	0.047483	0.0824841	0.145	0.075	1	RUBCN	1.32346
CENPC	0.047602	0.160848	0.391	0.289	1	CENPC	1.32237
MORF4L1	0.0480735	0.124855	0.841	0.754	1	MORF4L1	1.31809
EPC1	0.0482335	0.157963	0.551	0.487	1	EPC1	1.31665
TCP11L2	0.0484237	-0.0721994	0.109	0.203	1	TCP11L2	1.31494
AP2S1	0.0489332	-0.1357	0.478	0.594	1	AP2S1	1.3104
TNFSF12	0.0491429	-0.118464	0.471	0.556	1	TNFSF12	1.30854
CUL3	0.0491472	0.168615	0.464	0.38	1	CUL3	1.3085
AP2B1	0.0494727	0.122472	0.391	0.294	1	AP2B1	1.30563
IL16	0.0494938	-0.133513	0.449	0.545	1	IL16	1.30545
MRPL37	0.0498008	-0.112286	0.08	0.15	1	MRPL37	1.30276
ASMTL	0.0499054	0.111085	0.167	0.096	1	ASMTL	1.30185
COMMD5	0.0500591	-0.131268	0.159	0.246	1	COMMD5	1.30052
TMSB10	0.0501493	-0.0783836	1	1	1	TMSB10	1.29974
EIF2B4	0.0503199	0.0865404	0.145	0.075	1	EIF2B4	1.29826
IREB2	0.0504824	0.0801551	0.254	0.16	1	IREB2	1.29686
NANS	0.0507096	-0.0895428	0.174	0.267	1	NANS	1.29491
BRCC3	0.0507141	-0.132471	0.058	0.118	1	BRCC3	1.29487
RPRD1A	0.0507141	-0.140423	0.058	0.118	1	RPRD1A	1.29487
GTF3C6	0.0508919	-0.136668	0.63	0.722	1	GTF3C6	1.29335
RRS1	0.0512138	-0.114807	0.138	0.225	1	RRS1	1.29061
GPX7	0.0512845	0.107407	0.152	0.086	1	GPX7	1.29001
FTH1	0.0514937	-0.116929	0.993	1	1	FTH1	1.28825
HACD4	0.0516545	-0.11631	0.188	0.294	1	HACD4	1.28689
ESCO1	0.0521781	0.151781	0.362	0.262	1	ESCO1	1.28251
HIF1AN	0.0522456	-0.129095	0.087	0.155	1	HIF1AN	1.28195
RNF146	0.0522747	0.0608014	0.116	0.053	1	RNF146	1.28171
RAB9A	0.0523989	-0.0976416	0.167	0.262	1	RAB9A	1.28068
CHCHD3	0.0524547	0.123648	0.196	0.123	1	CHCHD3	1.28022
ACP5	0.052552	-0.151731	0.254	0.358	1	ACP5	1.27941
HSH2D	0.0528681	0.102095	0.174	0.102	1	HSH2D	1.27681
SKP1	0.0529945	0.112999	0.949	0.941	1	SKP1	1.27577
CHRNB1	0.0532816	-0.07934	0.051	0.112	1	CHRNB1	1.27342
PURA	0.0533039	0.155562	0.514	0.417	1	PURA	1.27324
CDK7	0.0533305	-0.083408	0.043	0.102	1	CDK7	1.27302
EIF3G	0.0534986	-0.102414	0.804	0.856	1	EIF3G	1.27166
PAAF1	0.0535227	0.0642796	0.167	0.091	1	PAAF1	1.27146
DNAJA3	0.0536157	-0.101994	0.08	0.15	1	DNAJA3	1.27071
INPP5F	0.0536502	-0.0852242	0.043	0.102	1	INPP5F	1.27043
AC108463.3	0.0538916	0.13182	0.145	0.08	1	AC108463.3	1.26848
WDR61	0.0539932	0.108199	0.239	0.15	1	WDR61	1.26766
RFTN1	0.0540186	0.142263	0.341	0.251	1	RFTN1	1.26746
BAG5	0.0541224	-0.124421	0.188	0.283	1	BAG5	1.26662
TFAM	0.0542048	-0.163518	0.239	0.326	1	TFAM	1.26596
DYNLL2	0.0542317	-0.122703	0.094	0.166	1	DYNLL2	1.26575
POU2F2	0.0542427	-0.275562	0.464	0.54	1	POU2F2	1.26566
B4GALT3	0.0543054	-0.116622	0.21	0.305	1	B4GALT3	1.26516
ZBTB14	0.0544165	-0.10475	0.072	0.139	1	ZBTB14	1.26427
GNL1	0.0545635	0.141959	0.196	0.118	1	GNL1	1.2631
HELB	0.0546003	0.128292	0.362	0.267	1	HELB	1.26281
GRK5	0.0547257	0.13733	0.145	0.08	1	GRK5	1.26181
KLHL9	0.0547968	0.0826205	0.13	0.07	1	KLHL9	1.26125
SUPV3L1	0.0548123	-0.089356	0.051	0.112	1	SUPV3L1	1.26112
DCAF5	0.0549489	0.13938	0.181	0.112	1	DCAF5	1.26004
ACAT1	0.055053	-0.108138	0.109	0.187	1	ACAT1	1.25922
CRYZL1	0.0552445	-0.120177	0.094	0.166	1	CRYZL1	1.25771
NT5C2	0.0552469	-0.10689	0.072	0.139	1	NT5C2	1.25769
KCMF1	0.0553641	-0.0913618	0.261	0.38	1	KCMF1	1.25677
SLC22A18	0.055391	0.11706	0.13	0.07	1	SLC22A18	1.25656
LIPA	0.055391	-0.0758951	0.058	0.123	1	LIPA	1.25656
NSA2	0.0553935	0.198473	0.674	0.674	1	NSA2	1.25654
HSP90AA1	0.055403	0.143191	0.993	0.968	1	HSP90AA1	1.25647
ATXN7L3B	0.0558177	0.154498	0.362	0.278	1	ATXN7L3B	1.25323
RBM25	0.0561597	-0.152282	0.623	0.679	1	RBM25	1.25058
MRPS14	0.0561728	-0.141195	0.152	0.235	1	MRPS14	1.25047
NDUFA11	0.0561876	-0.0843867	0.681	0.775	1	NDUFA11	1.25036
GDAP2	0.0562659	-0.0187017	0.043	0.102	1	GDAP2	1.24975
RAB3IP	0.0564427	0.112115	0.174	0.102	1	RAB3IP	1.24839
FXN	0.0565658	-0.118375	0.08	0.15	1	FXN	1.24745
MAP3K12	0.0566002	-0.0830701	0.043	0.102	1	MAP3K12	1.24718
HIST1H2AC	0.0567671	0.118645	0.116	0.059	1	HIST1H2AC	1.2459
SASH3	0.056879	0.148415	0.319	0.23	1	SASH3	1.24505
HERPUD1	0.0569594	0.158128	0.674	0.578	1	HERPUD1	1.24443
RNASEH2B	0.0570982	0.178262	0.457	0.385	1	RNASEH2B	1.24338
SNX27	0.0572344	0.108759	0.174	0.102	1	SNX27	1.24234
EIF3F	0.0572927	-0.120782	0.855	0.861	1	EIF3F	1.2419
RCOR3	0.0573884	-0.129769	0.065	0.128	1	RCOR3	1.24118
SNHG8	0.0576725	-0.150353	0.384	0.476	1	SNHG8	1.23903
PRPF8	0.0577189	0.181968	0.442	0.364	1	PRPF8	1.23868
YTHDF2	0.0577612	-0.161686	0.362	0.46	1	YTHDF2	1.23836
GRINA	0.0578215	-0.0860809	0.058	0.123	1	GRINA	1.23791
MIDN	0.0578659	-0.0992102	0.254	0.385	1	MIDN	1.23758
PRKDC	0.0578972	-0.187264	0.355	0.428	1	PRKDC	1.23734
SLC25A12	0.0586032	0.0984302	0.123	0.064	1	SLC25A12	1.23208
RANBP9	0.058706	0.140896	0.217	0.139	1	RANBP9	1.23132
POLK	0.0587176	0.0891503	0.29	0.203	1	POLK	1.23123
NIPA2	0.0587484	0.0950811	0.239	0.15	1	NIPA2	1.231
SMARCD1	0.0588688	0.125701	0.203	0.128	1	SMARCD1	1.23011
HNRNPUL2	0.0589849	0.125052	0.167	0.096	1	HNRNPUL2	1.22926
RAB37	0.0590213	-0.114179	0.13	0.219	1	RAB37	1.22899
MTMR12	0.0590752	0.101577	0.116	0.059	1	MTMR12	1.22859
PHB2	0.0591573	0.133121	0.587	0.492	1	PHB2	1.22799
RFXAP	0.0592508	0.0932578	0.123	0.064	1	RFXAP	1.22731
BAG6	0.0592632	0.0912389	0.167	0.096	1	BAG6	1.22721
GMPPA	0.0593345	-0.0788297	0.043	0.102	1	GMPPA	1.22669
DDX55	0.0593851	0.106962	0.13	0.07	1	DDX55	1.22632
BTF3	0.0593975	-0.0842655	0.971	1	1	BTF3	1.22623
2020-03-06	0.0594547	0.116748	0.348	0.251	1	2020-03-06	1.22581
SLC4A7	0.0595169	0.153773	0.333	0.251	1	SLC4A7	1.22536
CDKN2AIPNL	0.0595584	-0.0929234	0.072	0.139	1	CDKN2AIPNL	1.22506
BUD31	0.0597213	-0.140012	0.42	0.497	1	BUD31	1.22387
POLR3K	0.0598254	-0.119965	0.283	0.374	1	POLR3K	1.22311
GTF2A1	0.0598786	0.132215	0.203	0.128	1	GTF2A1	1.22273
GNA15	0.0599295	-0.122252	0.101	0.176	1	GNA15	1.22236
EDF1	0.0600075	-0.127908	0.833	0.877	1	EDF1	1.22179
FYB1	0.0604419	0.227116	0.783	0.775	1	FYB1	1.21866
NUDT18	0.0605845	0.0973459	0.101	0.048	1	NUDT18	1.21764
POLRMT	0.0607547	0.0952912	0.138	0.075	1	POLRMT	1.21642
AC025164.1	0.0607953	0.14827	0.217	0.144	1	AC025164.1	1.21613
SARS	0.0608699	0.15593	0.37	0.283	1	SARS	1.2156
GPR132	0.0610995	-0.13713	0.123	0.198	1	GPR132	1.21396
SFSWAP	0.0611738	0.130629	0.341	0.251	1	SFSWAP	1.21343
RDH14	0.0614324	-0.112308	0.152	0.235	1	RDH14	1.2116
TRMT13	0.0615336	0.121962	0.283	0.193	1	TRMT13	1.21089
DLST	0.0615368	0.0919654	0.159	0.091	1	DLST	1.21086
SLC25A39	0.0618762	-0.116829	0.188	0.278	1	SLC25A39	1.20848
ETAA1	0.0621567	0.0910393	0.116	0.059	1	ETAA1	1.20651
DDX52	0.0624307	0.114755	0.261	0.176	1	DDX52	1.2046
SFT2D2	0.0624394	0.131064	0.217	0.139	1	SFT2D2	1.20454
LY6E	0.0624725	0.202684	0.696	0.599	1	LY6E	1.20431
LPAR2	0.0625071	0.115669	0.188	0.118	1	LPAR2	1.20407
USP42	0.0625784	0.113101	0.123	0.064	1	USP42	1.20358
PPP3CC	0.0626332	-0.108432	0.101	0.176	1	PPP3CC	1.2032
EHBP1	0.0628295	0.0846609	0.101	0.048	1	EHBP1	1.20184
SETD4	0.0628295	0.0727206	0.101	0.048	1	SETD4	1.20184
STK11	0.0628377	-0.101468	0.152	0.23	1	STK11	1.20178
SRM	0.0628502	-0.121546	0.297	0.396	1	SRM	1.20169
KBTBD4	0.0628592	0.0989452	0.116	0.059	1	KBTBD4	1.20163
NUPL2	0.0629813	-0.108793	0.167	0.262	1	NUPL2	1.20079
CHMP2B	0.0629831	0.0980825	0.384	0.278	1	CHMP2B	1.20078
COA5	0.0630277	0.114347	0.239	0.16	1	COA5	1.20047
FAM160B1	0.0633182	0.156014	0.268	0.193	1	FAM160B1	1.19847
CYB561D2	0.063372	0.123842	0.348	0.251	1	CYB561D2	1.1981
MRPL43	0.0633893	0.0995117	0.442	0.332	1	MRPL43	1.19798
FAM49B	0.0634408	0.161351	0.725	0.62	1	FAM49B	1.19763
C11orf68	0.06348	0.0996215	0.181	0.107	1	C11orf68	1.19736
TPMT	0.0637707	-0.0982124	0.109	0.187	1	TPMT	1.19538
ARID5A	0.0639096	0.115913	0.587	0.497	1	ARID5A	1.19443
SMAD7	0.0641044	-0.118039	0.051	0.107	1	SMAD7	1.19311
SLC27A5	0.064284	0.101235	0.116	0.059	1	SLC27A5	1.1919
ADAT1	0.0643133	-0.108374	0.087	0.155	1	ADAT1	1.1917
NUP50	0.0644419	0.152246	0.413	0.316	1	NUP50	1.19083
LSM7	0.0646007	0.134096	0.652	0.561	1	LSM7	1.18976
PUS7L	0.0648904	-0.111441	0.203	0.299	1	PUS7L	1.18782
SUPT16H	0.065065	-0.102279	0.377	0.481	1	SUPT16H	1.18665
SYNRG	0.0650673	-0.129162	0.478	0.572	1	SYNRG	1.18664
FAF2	0.0657547	-0.121172	0.181	0.262	1	FAF2	1.18207
NME7	0.0658084	-0.0912675	0.058	0.118	1	NME7	1.18172
XAF1	0.065812	0.141356	0.442	0.342	1	XAF1	1.1817
EIF4EBP2	0.06604	0.101133	0.275	0.187	1	EIF4EBP2	1.18019
CBLB	0.0661127	0.15226	0.21	0.139	1	CBLB	1.17971
NR1H2	0.0663245	0.120135	0.326	0.241	1	NR1H2	1.17833
NFATC1	0.0665102	-0.0895082	0.058	0.118	1	NFATC1	1.17711
TSR2	0.0666885	0.104939	0.268	0.182	1	TSR2	1.17595
TNRC18	0.0668414	0.0754397	0.116	0.059	1	TNRC18	1.17495
HINT1	0.0669375	-0.09631	0.986	0.984	1	HINT1	1.17433
IL17RA	0.0670556	0.100518	0.239	0.16	1	IL17RA	1.17357
ETV7	0.0672181	-0.130276	0.283	0.374	1	ETV7	1.17251
SERPINB1	0.0672559	0.157076	0.63	0.567	1	SERPINB1	1.17227
UCKL1	0.0674054	-0.10341	0.08	0.144	1	UCKL1	1.17131
PHRF1	0.0674623	0.121909	0.174	0.107	1	PHRF1	1.17094
MTDH	0.067521	0.148087	0.725	0.695	1	MTDH	1.17056
ELOVL1	0.0677468	0.113209	0.21	0.139	1	ELOVL1	1.16911
EDEM3	0.0677639	-0.0679168	0.094	0.166	1	EDEM3	1.169
CXorf38	0.0680135	-0.0950926	0.188	0.294	1	CXorf38	1.1674
ZNF566	0.0680915	0.0890397	0.13	0.07	1	ZNF566	1.16691
THOC1	0.0680949	0.113744	0.239	0.16	1	THOC1	1.16689
SLC25A11	0.0681798	-0.167016	0.283	0.364	1	SLC25A11	1.16634
SPN	0.0685606	0.118013	0.645	0.556	1	SPN	1.16393
AGMAT	0.0687909	0.081203	0.109	0.053	1	AGMAT	1.16247
PDE3B	0.069111	-0.0914066	0.464	0.583	1	PDE3B	1.16045
RAB28	0.0692165	-0.114748	0.065	0.123	1	RAB28	1.15979
RGCC	0.0692654	0.15475	0.594	0.508	1	RGCC	1.15948
SQSTM1	0.0693153	0.151999	0.63	0.567	1	SQSTM1	1.15917
ARL3	0.0695238	0.129561	0.145	0.086	1	ARL3	1.15787
PDE7A	0.0695653	-0.167954	0.239	0.321	1	PDE7A	1.15761
EIF3A	0.0697689	-0.0974449	0.696	0.824	1	EIF3A	1.15634
SON	0.0699481	0.169957	0.848	0.813	1	SON	1.15522
PTGER2	0.070104	-0.152159	0.326	0.417	1	PTGER2	1.15426
CRNKL1	0.0705596	-0.127457	0.116	0.187	1	CRNKL1	1.15144
SYF2	0.0706519	-0.0691088	0.587	0.663	1	SYF2	1.15088
RALGDS	0.0710206	-0.132946	0.275	0.38	1	RALGDS	1.14862
STMP1	0.0710259	-0.12252	0.312	0.406	1	STMP1	1.14858
GTF2H2C	0.0711873	0.0686612	0.109	0.053	1	GTF2H2C	1.1476
SPPL2B	0.0711873	0.0678783	0.109	0.053	1	SPPL2B	1.1476
SDHAF2	0.0713676	-0.114386	0.225	0.31	1	SDHAF2	1.1465
GPATCH8	0.0714865	0.134741	0.442	0.358	1	GPATCH8	1.14578
COX7A2	0.0718385	0.0991957	0.862	0.781	1	COX7A2	1.14364
FUCA2	0.0719988	0.126013	0.174	0.112	1	FUCA2	1.14267
XPO4	0.0722078	0.0690532	0.116	0.059	1	XPO4	1.14142
IP6K1	0.0722352	-0.143277	0.145	0.214	1	IP6K1	1.14125
ATMIN	0.0724442	-0.115264	0.123	0.198	1	ATMIN	1.14
ZNF431	0.0726791	-0.103818	0.159	0.246	1	ZNF431	1.13859
THAP7	0.072848	-0.0904926	0.13	0.214	1	THAP7	1.13758
TOP1	0.0728777	0.148044	0.652	0.599	1	TOP1	1.13741
LAT	0.0729822	-0.0962553	0.63	0.749	1	LAT	1.13678
FBXL4	0.0732022	-0.0893238	0.051	0.107	1	FBXL4	1.13548
DNAJC7	0.0733326	0.136501	0.609	0.529	1	DNAJC7	1.1347
SNX2	0.0733548	0.116139	0.362	0.283	1	SNX2	1.13457
AC068491.3	0.073439	-0.0950737	0.072	0.134	1	AC068491.3	1.13407
PPP1R15B	0.0734863	0.117071	0.167	0.102	1	PPP1R15B	1.13379
COX8A	0.0737483	-0.108503	0.812	0.872	1	COX8A	1.13225
DAZAP2	0.0739231	0.139271	0.674	0.615	1	DAZAP2	1.13122
C17orf67	0.0739913	-0.137724	0.08	0.139	1	C17orf67	1.13082
TM2D3	0.0741222	0.138159	0.225	0.15	1	TM2D3	1.13005
WDR18	0.0743316	0.163144	0.239	0.16	1	WDR18	1.12883
HNRNPA1P48	0.0744104	-0.0859527	0.051	0.107	1	HNRNPA1P48	1.12837
TRAP1	0.0744104	-0.0903783	0.051	0.107	1	TRAP1	1.12837
NCK1	0.0744926	-0.107259	0.355	0.465	1	NCK1	1.12789
PNKP	0.0745506	0.142425	0.326	0.241	1	PNKP	1.12755
CALM3	0.0745742	0.149547	0.775	0.754	1	CALM3	1.12741
CORO1B	0.0746155	-0.054532	0.754	0.872	1	CORO1B	1.12717
MTAP	0.0748333	0.120381	0.21	0.144	1	MTAP	1.12591
RRAGA	0.0749057	0.11033	0.341	0.246	1	RRAGA	1.12549
STX18	0.0751407	-0.102917	0.087	0.155	1	STX18	1.12412
SDHAF3	0.0752605	-0.117202	0.167	0.246	1	SDHAF3	1.12343
RNF13	0.0752907	0.142832	0.312	0.225	1	RNF13	1.12326
RANBP6	0.0753401	0.102006	0.181	0.112	1	RANBP6	1.12297
NDUFS8	0.0754227	0.171214	0.623	0.54	1	NDUFS8	1.1225
CYTIP	0.0756971	0.0978907	0.775	0.743	1	CYTIP	1.12092
BRMS1	0.075815	-0.15538	0.217	0.305	1	BRMS1	1.12024
UBAC1	0.0758766	-0.110069	0.123	0.198	1	UBAC1	1.11989
NOL7	0.0759362	0.153235	0.725	0.636	1	NOL7	1.11955
AGA	0.0761106	-0.109102	0.087	0.15	1	AGA	1.11856
DOCK2	0.0761237	-0.112357	0.333	0.428	1	DOCK2	1.11848
FBXW11	0.0761813	-0.123364	0.123	0.198	1	FBXW11	1.11815
TRPC4AP	0.0762045	-0.0916946	0.116	0.193	1	TRPC4AP	1.11802
FBXO25	0.0762072	-0.0603218	0.058	0.118	1	FBXO25	1.118
CD2AP	0.0764406	0.0832048	0.232	0.155	1	CD2AP	1.11668
DDRGK1	0.0765937	0.100333	0.435	0.342	1	DDRGK1	1.11581
PEPD	0.0767969	-0.125532	0.225	0.321	1	PEPD	1.11466
TLK2	0.07695	-0.125227	0.094	0.16	1	TLK2	1.11379
SAMD9	0.077364	0.17753	0.688	0.599	1	SAMD9	1.11146
TAOK1	0.0782843	0.126215	0.261	0.193	1	TAOK1	1.10633
PSMD5	0.0787897	0.0644362	0.109	0.053	1	PSMD5	1.10353
DELE1	0.0788963	0.116847	0.138	0.08	1	DELE1	1.10294
FAM129A	0.0790654	-0.153573	0.529	0.61	1	FAM129A	1.10201
ZFP91	0.0797099	0.100216	0.188	0.118	1	ZFP91	1.09849
SLC25A33	0.0797256	-0.08872	0.058	0.112	1	SLC25A33	1.0984
CPTP	0.0798588	0.116202	0.138	0.08	1	CPTP	1.09768
ABCA7	0.0802314	-0.0725169	0.058	0.118	1	ABCA7	1.09566
ETS1	0.0803795	0.134285	0.848	0.834	1	ETS1	1.09485
MYADM	0.0804393	0.103258	0.145	0.086	1	MYADM	1.09453
CHP1	0.0804908	0.0824572	0.181	0.112	1	CHP1	1.09425
RANBP1	0.0805314	0.168417	0.522	0.449	1	RANBP1	1.09403
MEAF6	0.0811286	0.144743	0.464	0.364	1	MEAF6	1.09083
RBM28	0.0811925	0.160616	0.203	0.139	1	RBM28	1.09048
GNG8	0.0812226	0.159927	0.138	0.08	1	GNG8	1.09032
SMC5	0.0813025	-0.153062	0.268	0.358	1	SMC5	1.0899
YWHAE	0.0814643	0.123729	0.609	0.513	1	YWHAE	1.08903
EHMT1	0.0815757	0.0884697	0.297	0.209	1	EHMT1	1.08844
THOC7	0.0816399	0.151292	0.5	0.444	1	THOC7	1.0881
FLI1	0.0816691	0.10671	0.246	0.171	1	FLI1	1.08794
EEF1A1	0.0821517	-0.0584064	1	1	1	EEF1A1	1.08538
TAF7	0.0823409	0.140235	0.471	0.364	1	TAF7	1.08438
WDR75	0.0824185	-0.0710652	0.072	0.134	1	WDR75	1.08398
TOMM22	0.0826235	0.111876	0.493	0.401	1	TOMM22	1.0829
URI1	0.0826349	0.152839	0.587	0.471	1	URI1	1.08284
TRAPPC6B	0.0827579	-0.112837	0.145	0.219	1	TRAPPC6B	1.08219
PLCL2	0.0828123	0.104914	0.21	0.134	1	PLCL2	1.08191
SETDB2	0.0829372	0.120231	0.181	0.118	1	SETDB2	1.08125
SH2D1A	0.0829946	0.112941	0.348	0.262	1	SH2D1A	1.08095
MTMR1	0.0831031	-0.0888457	0.058	0.112	1	MTMR1	1.08038
PCM1	0.0832303	0.155824	0.609	0.513	1	PCM1	1.07972
RAB5B	0.0832676	0.0772399	0.196	0.123	1	RAB5B	1.07952
ZNF562	0.0833264	0.102095	0.145	0.086	1	ZNF562	1.07922
TMED4	0.0835115	-0.129972	0.399	0.487	1	TMED4	1.07825
LAGE3	0.0835668	-0.103091	0.188	0.273	1	LAGE3	1.07797
RPS6KA3	0.0839983	0.112008	0.319	0.246	1	RPS6KA3	1.07573
CAB39	0.0845255	0.184992	0.413	0.358	1	CAB39	1.07301
ARL6IP1	0.0846571	-0.114744	0.37	0.46	1	ARL6IP1	1.07234
MIS18BP1	0.0847773	0.120868	0.471	0.385	1	MIS18BP1	1.07172
AAGAB	0.084801	-0.0974286	0.087	0.15	1	AAGAB	1.0716
NDUFB3	0.0848043	0.115348	0.645	0.561	1	NDUFB3	1.07158
NCOA6	0.0848161	0.094727	0.138	0.08	1	NCOA6	1.07152
RPAP2	0.0848766	0.100427	0.341	0.241	1	RPAP2	1.07121
SH3GLB2	0.0857346	0.118253	0.203	0.134	1	SH3GLB2	1.06684
VCP	0.0858643	0.0683319	0.703	0.578	1	VCP	1.06619
FHL3	0.0861409	0.0835934	0.174	0.107	1	FHL3	1.06479
NUDT14	0.0862498	-0.0756288	0.08	0.144	1	NUDT14	1.06424
FBH1	0.0862847	-0.117793	0.21	0.299	1	FBH1	1.06407
JAGN1	0.0863159	0.120379	0.333	0.251	1	JAGN1	1.06391
ARFIP2	0.0863245	-0.106525	0.087	0.15	1	ARFIP2	1.06387
APH1A	0.0863729	-0.115384	0.239	0.326	1	APH1A	1.06362
TM2D2	0.0863856	0.14783	0.217	0.155	1	TM2D2	1.06356
PRKRIP1	0.0865091	0.0981003	0.174	0.107	1	PRKRIP1	1.06294
KATNBL1	0.0866987	-0.155903	0.181	0.251	1	KATNBL1	1.06199
DCXR	0.086774	0.104846	0.319	0.23	1	DCXR	1.06161
SLC30A9	0.0868216	-0.0530545	0.072	0.134	1	SLC30A9	1.06137
PCED1B	0.0869681	-0.142854	0.348	0.428	1	PCED1B	1.06064
FAM122A	0.0869859	0.0736444	0.268	0.182	1	FAM122A	1.06055
CASP8	0.0870272	0.144339	0.638	0.599	1	CASP8	1.06035
ANAPC10	0.0871035	0.117502	0.145	0.086	1	ANAPC10	1.05996
ELOF1	0.0871085	-0.0819946	0.159	0.246	1	ELOF1	1.05994
AKR1B1	0.0871935	0.103807	0.254	0.182	1	AKR1B1	1.05952
ATP6V1B2	0.0873168	-0.102863	0.123	0.198	1	ATP6V1B2	1.0589
SNRNP40	0.0873995	-0.0984784	0.239	0.337	1	SNRNP40	1.05849
SMIM19	0.08742	-0.060685	0.312	0.406	1	SMIM19	1.05839
EXOG	0.0874866	0.105786	0.246	0.166	1	EXOG	1.05806
EIF1B	0.087636	-0.120716	0.514	0.626	1	EIF1B	1.05732
FLAD1	0.0876422	-0.0752913	0.072	0.134	1	FLAD1	1.05729
NUCB1	0.0879233	0.111584	0.5	0.412	1	NUCB1	1.0559
SETDB1	0.0880893	0.111762	0.101	0.053	1	SETDB1	1.05508
PCBP2	0.0881248	-0.132418	0.572	0.674	1	PCBP2	1.0549
UBN1	0.0883637	0.223425	0.333	0.267	1	UBN1	1.05373
FBXL15	0.088657	0.153643	0.399	0.332	1	FBXL15	1.05229
MT2A	0.0887623	0.129124	0.514	0.417	1	MT2A	1.05177
JMJD1C	0.088825	-0.124182	0.268	0.353	1	JMJD1C	1.05146
SLBP	0.0888754	-0.066352	0.283	0.39	1	SLBP	1.05122
SYAP1	0.0888777	0.0889657	0.377	0.278	1	SYAP1	1.05121
PRPF40A	0.0891632	-0.125761	0.457	0.556	1	PRPF40A	1.04981
PIP4K2B	0.0894514	0.0342802	0.109	0.053	1	PIP4K2B	1.04841
GTF3A	0.0894601	0.120144	0.833	0.781	1	GTF3A	1.04837
LYSMD3	0.0895313	-0.108424	0.08	0.139	1	LYSMD3	1.04803
APOPT1	0.0895946	0.171855	0.232	0.16	1	APOPT1	1.04772
UFC1	0.0897555	-0.138464	0.659	0.706	1	UFC1	1.04694
KLF6	0.0898988	0.140575	0.645	0.599	1	KLF6	1.04625
IGLC2	0.0899222	0.11735	0.116	0.064	1	IGLC2	1.04613
ZNF544	0.0901587	0.0966828	0.13	0.075	1	ZNF544	1.04499
TAF12	0.0902901	-0.0793421	0.225	0.316	1	TAF12	1.04436
ARHGAP5	0.0905148	0.153705	0.297	0.225	1	ARHGAP5	1.04328
WWP1	0.0905176	0.120973	0.384	0.31	1	WWP1	1.04327
ZNF282	0.0905709	0.0883159	0.101	0.053	1	ZNF282	1.04301
GPATCH2L	0.0906513	-0.0959293	0.268	0.358	1	GPATCH2L	1.04263
DAP	0.0907646	0.0324875	0.152	0.086	1	DAP	1.04208
PIGBOS1	0.0908711	-0.10869	0.21	0.294	1	PIGBOS1	1.04157
CHURC1	0.0909511	0.118823	0.667	0.583	1	CHURC1	1.04119
HMGXB3	0.0914115	0.0825941	0.174	0.107	1	HMGXB3	1.039
RNGTT	0.0915363	0.0946685	0.167	0.102	1	RNGTT	1.03841
ZSWIM8	0.0916052	0.0886568	0.109	0.059	1	ZSWIM8	1.03808
TXNRD2	0.0916052	-0.0809442	0.051	0.102	1	TXNRD2	1.03808
COX6B1	0.0920533	-0.130521	0.804	0.861	1	COX6B1	1.03596
WBP4	0.0920714	0.107055	0.225	0.15	1	WBP4	1.03588
DENND4C	0.0920897	-0.12273	0.116	0.182	1	DENND4C	1.03579
ABCD4	0.0921877	0.097239	0.217	0.144	1	ABCD4	1.03533
WDFY2	0.0923266	0.0885368	0.167	0.102	1	WDFY2	1.03467
DUSP23	0.0923436	0.124933	0.239	0.171	1	DUSP23	1.03459
CD164	0.0924896	0.122589	0.638	0.588	1	CD164	1.03391
UBC	0.0929933	0.0998492	1	0.984	1	UBC	1.03155
METTL5	0.0931432	-0.061326	0.29	0.406	1	METTL5	1.03085
CYB5R1	0.0932711	-0.0744426	0.065	0.123	1	CYB5R1	1.03025
PPFIA1	0.0933224	-0.0967374	0.116	0.187	1	PPFIA1	1.03001
CLASP2	0.0937227	-0.0732273	0.065	0.123	1	CLASP2	1.02816
UTRN	0.0940811	0.108959	0.471	0.374	1	UTRN	1.0265
CLK3	0.0942467	0.107936	0.196	0.128	1	CLK3	1.02573
PRPSAP2	0.0943635	-0.0939106	0.087	0.144	1	PRPSAP2	1.0252
KYAT3	0.0946516	0.102612	0.217	0.144	1	KYAT3	1.02387
PMF1	0.0947581	0.065006	0.543	0.46	1	PMF1	1.02338
TRIM73	0.0947679	0.108823	0.21	0.144	1	TRIM73	1.02334
UXS1	0.0948671	0.146621	0.514	0.471	1	UXS1	1.02288
STX7	0.0955659	0.116358	0.217	0.15	1	STX7	1.0197
AC137932.3	0.0955779	0.0799931	0.109	0.059	1	AC137932.3	1.01964
NKRF	0.0957029	0.0776834	0.101	0.053	1	NKRF	1.01907
CD320	0.095779	0.124795	0.493	0.406	1	CD320	1.01873
VPS4B	0.0957984	0.124955	0.464	0.38	1	VPS4B	1.01864
MEX3C	0.0960412	-0.124654	0.159	0.23	1	MEX3C	1.01754
ZNF644	0.0962103	0.094739	0.362	0.278	1	ZNF644	1.01678
PDCL	0.0963223	0.116532	0.326	0.251	1	PDCL	1.01627
SPTSSA	0.0963543	-0.0658489	0.087	0.15	1	SPTSSA	1.01613
NUP210	0.0965432	0.135856	0.333	0.262	1	NUP210	1.01528
HIF1A	0.0965908	0.149823	0.261	0.198	1	HIF1A	1.01506
MKNK1	0.0969366	-0.085366	0.101	0.166	1	MKNK1	1.01351
DCUN1D5	0.097072	0.104934	0.232	0.16	1	DCUN1D5	1.01291
SGPP2	0.0971028	0.0760622	0.109	0.059	1	SGPP2	1.01277
TAF1	0.097263	0.0996383	0.145	0.086	1	TAF1	1.01205
FBXO42	0.0972871	0.0799656	0.101	0.053	1	FBXO42	1.01194
CASP4	0.0973916	0.135681	0.601	0.529	1	CASP4	1.01148
CCDC127	0.0973988	0.0616306	0.13	0.075	1	CCDC127	1.01145
STAG1	0.0975197	-0.124347	0.181	0.246	1	STAG1	1.01091
CASP3	0.0978888	-0.109615	0.239	0.326	1	CASP3	1.00927
COA1	0.0980377	0.0647705	0.377	0.294	1	COA1	1.00861
MORC3	0.0980387	0.12025	0.58	0.492	1	MORC3	1.0086
PRRC2B	0.0981741	0.0949805	0.333	0.251	1	PRRC2B	1.008
ARL4C	0.0982187	-0.0918756	0.978	0.973	1	ARL4C	1.00781
MTF1	0.0986471	-0.0804756	0.051	0.102	1	MTF1	1.00592
STAMBP	0.0987338	-0.0783129	0.094	0.16	1	STAMBP	1.00553
PRDX6	0.0988329	0.0965424	0.529	0.449	1	PRDX6	1.0051
AC008124.1	0.0988759	0.0850235	0.138	0.08	1	AC008124.1	1.00491
RAB33A	0.0989528	-0.111878	0.232	0.31	1	RAB33A	1.00457
FAM102A	0.0990081	0.124757	0.413	0.332	1	FAM102A	1.00433
NDFIP1	0.0991158	0.0943673	0.696	0.62	1	NDFIP1	1.00386
TTC19	0.0992201	0.12561	0.362	0.294	1	TTC19	1.0034
IRF2	0.0993914	0.0967627	0.478	0.406	1	IRF2	1.00265
HAUS8	0.0994318	0.079788	0.101	0.053	1	HAUS8	1.00247
DPYD	0.0995057	-0.0845149	0.138	0.214	1	DPYD	1.00215
RELL2	0.0997539	-0.0854624	0.087	0.15	1	RELL2	1.00107
ATG4C	0.0998672	0.0826202	0.116	0.064	1	ATG4C	1.00058
IFT57	0.0999466	0.104966	0.188	0.123	1	IFT57	1.00023
TMUB2	0.100177	-0.107824	0.109	0.176	1	TMUB2	0.999233
TINF2	0.100224	-0.139152	0.254	0.337	1	TINF2	0.999028
DPP8	0.100254	0.0960936	0.261	0.182	1	DPP8	0.998896
SLF2	0.100271	0.124331	0.232	0.16	1	SLF2	0.998823
DGKH	0.100397	-0.152847	0.225	0.299	1	DGKH	0.99828
PET100	0.100572	0.116102	0.435	0.39	1	PET100	0.997524
ZNF280D	0.100594	0.108596	0.254	0.176	1	ZNF280D	0.997428
KLHL24	0.100615	0.0929007	0.239	0.166	1	KLHL24	0.997338
ANXA7	0.100621	0.0666038	0.601	0.481	1	ANXA7	0.99731
STAM2	0.100709	0.105717	0.13	0.075	1	STAM2	0.996931
MAN2A1	0.10074	-0.121472	0.116	0.176	1	MAN2A1	0.996797
B3GNT2	0.100767	0.104341	0.181	0.118	1	B3GNT2	0.99668
EIF2S1	0.100833	0.124844	0.348	0.267	1	EIF2S1	0.996396
CDC5L	0.100834	-0.157193	0.304	0.39	1	CDC5L	0.996391
TOMM40	0.100891	-0.11402	0.145	0.214	1	TOMM40	0.996147
C9orf85	0.10097	0.0918553	0.181	0.118	1	C9orf85	0.995807
MRPL48	0.101005	0.112589	0.174	0.112	1	MRPL48	0.995655
WDR82	0.10124	-0.143597	0.377	0.444	1	WDR82	0.994647
OTUD4	0.101386	-0.102452	0.094	0.155	1	OTUD4	0.994024
ARHGAP30	0.101644	0.196774	0.681	0.652	1	ARHGAP30	0.99292
ANAPC4	0.101667	-0.0746231	0.094	0.16	1	ANAPC4	0.99282
ZUP1	0.102243	-0.0940259	0.094	0.155	1	ZUP1	0.990366
TMEM147	0.102298	0.108984	0.42	0.348	1	TMEM147	0.990133
ARMC8	0.102361	-0.0702448	0.13	0.209	1	ARMC8	0.989865
SYTL1	0.102433	-0.114546	0.384	0.497	1	SYTL1	0.989561
MAD2L2	0.102774	0.114173	0.152	0.096	1	MAD2L2	0.988117
ARL17A	0.102861	0.0690396	0.109	0.059	1	ARL17A	0.987749
DLG3	0.102861	-0.0654088	0.051	0.102	1	DLG3	0.987749
ANXA2	0.103149	-0.0962839	0.732	0.765	1	ANXA2	0.986535
TMEM258	0.103388	-0.105608	0.529	0.631	1	TMEM258	0.985529
GEMIN5	0.103398	0.084957	0.109	0.059	1	GEMIN5	0.985489
RPSA	0.103428	-0.0668412	0.993	1	1	RPSA	0.985363
BCL3	0.103614	0.0619036	0.145	0.086	1	BCL3	0.984583
ABCE1	0.10403	0.115222	0.37	0.283	1	ABCE1	0.982839
MT-ND2	0.104444	-0.0682399	0.986	1	1	MT-ND2	0.981117
LTB	0.104699	-0.148215	1	1	1	LTB	0.980057
RHNO1	0.10485	-0.1126	0.094	0.155	1	RHNO1	0.97943
VDAC3	0.105077	0.124354	0.464	0.374	1	VDAC3	0.978492
TRAT1	0.105244	0.117947	0.312	0.235	1	TRAT1	0.977802
SLC38A2	0.105409	0.0600732	0.319	0.23	1	SLC38A2	0.977123
MAVS	0.105512	0.094312	0.196	0.128	1	MAVS	0.976697
CDK13	0.105809	0.137909	0.514	0.417	1	CDK13	0.975477
MTMR14	0.105845	0.0751204	0.203	0.134	1	MTMR14	0.975328
KLHL42	0.106091	0.0844631	0.13	0.075	1	KLHL42	0.97432
ANKRD13C	0.106126	0.112484	0.138	0.086	1	ANKRD13C	0.97418
MRPL4	0.106264	-0.0951963	0.261	0.342	1	MRPL4	0.973616
RNF111	0.106434	0.0748527	0.145	0.086	1	RNF111	0.972918
BCAT2	0.106664	0.0750972	0.101	0.053	1	BCAT2	0.971983
CTSZ	0.107137	0.100166	0.449	0.364	1	CTSZ	0.970061
CYBC1	0.107141	0.127094	0.457	0.364	1	CYBC1	0.970042
ABI2	0.107349	0.0857019	0.246	0.171	1	ABI2	0.969203
ZNF143	0.107605	0.110893	0.21	0.144	1	ZNF143	0.968169
GRSF1	0.107634	-0.115689	0.203	0.278	1	GRSF1	0.968052
HCFC1	0.107971	0.0867985	0.196	0.128	1	HCFC1	0.966692
RAP2A	0.10806	0.0978012	0.181	0.118	1	RAP2A	0.966335
SKAP1	0.108177	-0.0900623	0.645	0.738	1	SKAP1	0.965866
MRPS25	0.10819	-0.0798399	0.138	0.214	1	MRPS25	0.965815
EIF1	0.108194	-0.0663459	1	1	1	EIF1	0.965796
SLC30A6	0.108329	0.0613754	0.109	0.059	1	SLC30A6	0.965257
RBX1	0.108355	0.0608134	0.841	0.77	1	RBX1	0.965151
GPR82	0.108722	-0.127413	0.225	0.31	1	GPR82	0.963684
PRELID1	0.108785	0.101117	0.848	0.834	1	PRELID1	0.963431
HEXIM1	0.108801	0.0894678	0.196	0.128	1	HEXIM1	0.963367
CDC73	0.108871	0.112512	0.283	0.209	1	CDC73	0.963088
GNAI3	0.108901	0.0988306	0.442	0.364	1	GNAI3	0.962966
PHF11	0.109304	0.189365	0.471	0.422	1	PHF11	0.961364
TOMM70	0.109312	-0.0899001	0.094	0.155	1	TOMM70	0.96133
IFNGR1	0.109427	-0.0962687	0.116	0.182	1	IFNGR1	0.960877
NUP188	0.109442	0.112856	0.13	0.08	1	NUP188	0.960817
TXNIP	0.109449	-0.0938486	0.884	0.963	1	TXNIP	0.960789
C6orf47	0.109592	0.0552069	0.188	0.123	1	C6orf47	0.96022
AXIN1	0.109657	0.0621278	0.138	0.08	1	AXIN1	0.959965
RPN2	0.109801	-0.147742	0.428	0.481	1	RPN2	0.959395
DCAF12	0.109986	0.104697	0.123	0.075	1	DCAF12	0.958661
TFB1M	0.110177	0.090839	0.159	0.102	1	TFB1M	0.95791
PSTPIP1	0.110298	-0.0822328	0.304	0.401	1	PSTPIP1	0.957433
DHRS4L2	0.110435	0.0889911	0.174	0.112	1	DHRS4L2	0.956892
KLHL36	0.110455	-0.0985166	0.21	0.294	1	KLHL36	0.956816
TARSL2	0.110579	0.0573447	0.109	0.059	1	TARSL2	0.956327
ABCF3	0.110579	0.0562551	0.109	0.059	1	ABCF3	0.956327
DUT	0.110812	-0.128012	0.268	0.353	1	DUT	0.955413
CDC42	0.110976	-0.114807	0.79	0.84	1	CDC42	0.954769
TMEM129	0.111147	-0.0598055	0.051	0.102	1	TMEM129	0.954101
DCTN2	0.111393	-0.123349	0.362	0.449	1	DCTN2	0.95314
TMEM170A	0.111447	-0.0748957	0.13	0.198	1	TMEM170A	0.952932
RBMXL1	0.111532	0.103236	0.152	0.096	1	RBMXL1	0.9526
GABARAPL2	0.111725	0.0868483	0.739	0.69	1	GABARAPL2	0.951851
PRPF18	0.111774	0.0870068	0.174	0.112	1	PRPF18	0.951661
MRPL34	0.111858	-0.11324	0.507	0.594	1	MRPL34	0.951332
DSTN	0.112103	-0.0989979	0.304	0.412	1	DSTN	0.950384
STX5	0.112222	-0.0861659	0.101	0.166	1	STX5	0.94992
WDR83OS	0.112234	0.104147	0.645	0.556	1	WDR83OS	0.949876
UBE2S	0.112318	0.0819486	0.333	0.235	1	UBE2S	0.949551
STMN1	0.112386	0.107279	0.188	0.123	1	STMN1	0.949286
LUC7L	0.112386	-0.106078	0.116	0.176	1	LUC7L	0.949286
METTL21A	0.112505	0.102786	0.13	0.08	1	METTL21A	0.94883
DEDD	0.112604	0.0722276	0.116	0.064	1	DEDD	0.948448
ZNF84	0.112604	-0.0973831	0.058	0.107	1	ZNF84	0.948448
RPL36	0.112726	0.0646669	1	1	1	RPL36	0.947977
WSB2	0.112753	0.1073	0.181	0.123	1	WSB2	0.947872
SEC14L1	0.112835	-0.10258	0.341	0.439	1	SEC14L1	0.947556
MX1	0.11346	0.175771	0.384	0.326	1	MX1	0.945156
HMG20A	0.113704	0.0494622	0.101	0.053	1	HMG20A	0.944225
TCAIM	0.11372	-0.0904807	0.058	0.107	1	TCAIM	0.944162
ELOVL5	0.113735	-0.123338	0.268	0.358	1	ELOVL5	0.944106
NAT9	0.113925	0.110841	0.116	0.07	1	NAT9	0.943382
AATF	0.113972	0.0930094	0.449	0.385	1	AATF	0.943202
LST1	0.11409	0.166114	0.406	0.321	1	LST1	0.942752
RAC1	0.114415	-0.0460198	0.732	0.84	1	RAC1	0.941519
SC5D	0.114442	0.0644974	0.152	0.091	1	SC5D	0.941413
BRAF	0.114465	0.104966	0.254	0.182	1	BRAF	0.941327
TMEM41B	0.114578	-0.0980232	0.116	0.182	1	TMEM41B	0.9409
ZNF91	0.114657	0.0744898	0.341	0.251	1	ZNF91	0.940599
STN1	0.114688	-0.0791064	0.275	0.358	1	STN1	0.940481
GFOD2	0.114758	-0.102033	0.08	0.134	1	GFOD2	0.940219
TIPIN	0.114846	-0.0711609	0.058	0.107	1	TIPIN	0.939885
TRAPPC4	0.11512	-0.076176	0.399	0.487	1	TRAPPC4	0.93885
PSMC6	0.115135	-0.100926	0.362	0.487	1	PSMC6	0.938792
CNPPD1	0.1152	0.0894081	0.225	0.155	1	CNPPD1	0.938547
LSM1	0.115388	-0.0575035	0.377	0.471	1	LSM1	0.937838
IMP4	0.115404	0.0760532	0.225	0.155	1	IMP4	0.93778
ERCC6	0.11552	0.0427408	0.101	0.053	1	ERCC6	0.937344
RPL26	0.115599	-0.0524118	1	1	1	RPL26	0.937048
GDE1	0.11574	-0.0851318	0.123	0.187	1	GDE1	0.936515
AP5M1	0.115776	-0.0669894	0.13	0.203	1	AP5M1	0.936381
PPP1R16B	0.115923	-0.112922	0.152	0.219	1	PPP1R16B	0.935831
STAU2	0.116124	0.120433	0.181	0.128	1	STAU2	0.935076
C12orf57	0.116321	-0.106064	0.877	0.898	1	C12orf57	0.934343
ITPKB	0.116327	-0.105322	0.152	0.219	1	ITPKB	0.934318
MLKL	0.116384	-0.119106	0.188	0.257	1	MLKL	0.934109
CASK	0.116563	0.105608	0.514	0.428	1	CASK	0.933438
PIM1	0.116663	-0.115992	0.739	0.807	1	PIM1	0.933065
AKT2	0.116676	0.119591	0.196	0.139	1	AKT2	0.933018
PLRG1	0.116738	0.0951204	0.261	0.187	1	PLRG1	0.932789
SLC35E3	0.116937	0.017239	0.196	0.128	1	SLC35E3	0.932048
PRPF39	0.117301	-0.0972353	0.08	0.134	1	PRPF39	0.930699
RAB18	0.117439	0.129052	0.355	0.289	1	RAB18	0.930188
NDUFA9	0.117656	0.205671	0.37	0.326	1	NDUFA9	0.929385
SMARCA2	0.117658	0.0830152	0.435	0.358	1	SMARCA2	0.929379
TMEM106C	0.117692	0.0860101	0.188	0.123	1	TMEM106C	0.929254
TMEM127	0.117698	-0.0868	0.058	0.107	1	TMEM127	0.929233
PDPK1	0.11772	0.0883244	0.174	0.112	1	PDPK1	0.929149
PGRMC2	0.117956	0.125234	0.225	0.166	1	PGRMC2	0.928279
RBMS1	0.117993	0.100573	0.203	0.139	1	RBMS1	0.928146
XPC	0.118203	0.0900536	0.391	0.294	1	XPC	0.92737
RASSF5	0.118337	0.111246	0.587	0.524	1	RASSF5	0.926881
ZBTB17	0.118581	0.100415	0.123	0.075	1	ZBTB17	0.925986
MAGOHB	0.118733	-0.0792311	0.109	0.171	1	MAGOHB	0.925427
NTAN1	0.118829	0.138018	0.384	0.321	1	NTAN1	0.925076
ZNF22	0.118837	0.105287	0.246	0.182	1	ZNF22	0.925047
MPST	0.118896	-0.125546	0.217	0.283	1	MPST	0.924832
GCLM	0.119041	-0.0859039	0.13	0.198	1	GCLM	0.924302
PDRG1	0.119188	0.0910369	0.145	0.091	1	PDRG1	0.923767
INTS10	0.11952	0.126277	0.283	0.219	1	INTS10	0.922559
GRK2	0.119868	0.111547	0.507	0.412	1	GRK2	0.921297
PTPN1	0.120003	-0.0902996	0.275	0.348	1	PTPN1	0.920809
U2AF1L4	0.120169	-0.0973835	0.145	0.214	1	U2AF1L4	0.920208
CMC1	0.120567	0.108002	0.348	0.283	1	CMC1	0.918771
CD2	0.120639	0.0892859	0.957	0.952	1	CD2	0.918513
SERINC5	0.120715	0.103608	0.174	0.118	1	SERINC5	0.918238
NUMA1	0.120716	-0.117509	0.319	0.406	1	NUMA1	0.918234
ARFRP1	0.120777	-0.0805237	0.159	0.23	1	ARFRP1	0.918014
GADD45B	0.121188	-0.0496902	0.312	0.401	1	GADD45B	0.916541
CCR7	0.121362	0.132261	0.507	0.428	1	CCR7	0.915918
POGK	0.121461	-0.0368295	0.08	0.134	1	POGK	0.915562
PLEKHA2	0.121513	-0.0233239	0.123	0.193	1	PLEKHA2	0.915378
PGS1	0.121527	-0.0709702	0.109	0.171	1	PGS1	0.915328
RNF5	0.121734	-0.129019	0.174	0.241	1	RNF5	0.914588
GALM	0.121861	0.132657	0.312	0.241	1	GALM	0.914137
GUK1	0.122203	0.0901309	0.906	0.898	1	GUK1	0.912919
MGAT4A	0.122213	0.0851622	0.167	0.107	1	MGAT4A	0.912884
LSR	0.12233	-0.147589	0.145	0.203	1	LSR	0.912468
AIP	0.122371	0.129925	0.652	0.631	1	AIP	0.91232
IGFLR1	0.122388	0.0898463	0.138	0.086	1	IGFLR1	0.912262
FYTTD1	0.122414	-0.100263	0.232	0.299	1	FYTTD1	0.91217
EIF2D	0.122443	-0.0939285	0.094	0.15	1	EIF2D	0.912067
ARIH1	0.122658	-0.113897	0.138	0.198	1	ARIH1	0.911303
SNAPC2	0.122706	0.127538	0.174	0.123	1	SNAPC2	0.911135
PSMF1	0.123	-0.118509	0.275	0.342	1	PSMF1	0.910095
MFSD12	0.123105	-0.0674145	0.094	0.155	1	MFSD12	0.909724
ATP2B1	0.123137	0.142197	0.355	0.289	1	ATP2B1	0.909612
TNPO1	0.123173	0.0763834	0.275	0.203	1	TNPO1	0.909486
HMGB2	0.12326	-0.10606	0.551	0.631	1	HMGB2	0.90918
SMIM7	0.123272	0.0898781	0.464	0.358	1	SMIM7	0.909135
TNPO3	0.12331	0.121829	0.196	0.139	1	TNPO3	0.909002
KAT2B	0.12343	0.0979655	0.261	0.193	1	KAT2B	0.90858
MPHOSPH10	0.123544	0.119716	0.348	0.267	1	MPHOSPH10	0.908179
RERE	0.123584	-0.0796913	0.116	0.182	1	RERE	0.908037
CAPRIN2	0.123623	-0.028718	0.051	0.102	1	CAPRIN2	0.907901
HMCES	0.123689	-0.105999	0.254	0.332	1	HMCES	0.90767
DCUN1D1	0.123879	-0.118746	0.13	0.198	1	DCUN1D1	0.907004
USP34	0.12419	0.116304	0.471	0.385	1	USP34	0.905914
ITPR2	0.124276	0.144122	0.312	0.246	1	ITPR2	0.905613
POLE3	0.1245	-0.132521	0.174	0.235	1	POLE3	0.904829
PPIL1	0.12455	0.0815357	0.138	0.086	1	PPIL1	0.904655
TRAF7	0.124605	-0.116132	0.087	0.139	1	TRAF7	0.904464
GATAD1	0.124742	0.0893043	0.268	0.198	1	GATAD1	0.903989
BICD1	0.124769	-0.0720114	0.058	0.107	1	BICD1	0.903895
UBE2D1	0.125182	-0.0571627	0.094	0.16	1	UBE2D1	0.90246
CD52	0.125297	-0.0846117	0.986	1	1	CD52	0.902058
ZNF576	0.125436	0.083735	0.13	0.08	1	ZNF576	0.901577
NBN	0.125607	0.0993051	0.268	0.193	1	NBN	0.900986
FAM200B	0.12566	-0.139567	0.181	0.246	1	FAM200B	0.900804
OLA1	0.125811	0.103042	0.442	0.364	1	OLA1	0.900282
DUSP11	0.125909	-0.117237	0.225	0.294	1	DUSP11	0.899942
AEN	0.125944	-0.0361372	0.065	0.118	1	AEN	0.899822
CCT2	0.125988	0.119984	0.406	0.326	1	CCT2	0.899672
ATP2A3	0.126371	0.108367	0.225	0.166	1	ATP2A3	0.898352
PDCD10	0.126432	0.124995	0.536	0.46	1	PDCD10	0.898144
DNTTIP2	0.126842	0.114115	0.428	0.358	1	DNTTIP2	0.896735
RAB6A	0.127099	0.0988201	0.312	0.241	1	RAB6A	0.895857
WDR7	0.127108	0.0957072	0.123	0.075	1	WDR7	0.895828
PRR5	0.127124	-0.0633196	0.072	0.128	1	PRR5	0.895772
FGFR1OP2	0.127143	0.146626	0.594	0.567	1	FGFR1OP2	0.895708
GNAQ	0.127268	0.133913	0.181	0.118	1	GNAQ	0.895282
CSNK1A1	0.127342	0.0955176	0.659	0.636	1	CSNK1A1	0.89503
ZNHIT6	0.127386	0.102105	0.21	0.15	1	ZNHIT6	0.894879
HPS3	0.127461	-0.101647	0.109	0.166	1	HPS3	0.894623
NIPSNAP2	0.128131	0.080949	0.152	0.096	1	NIPSNAP2	0.892344
ZMAT5	0.128183	0.120307	0.167	0.112	1	ZMAT5	0.892171
ZC3H15	0.128341	-0.106603	0.522	0.594	1	ZC3H15	0.891634
CD53	0.128472	-0.109215	0.826	0.861	1	CD53	0.891192
SLMAP	0.128507	-0.112972	0.145	0.203	1	SLMAP	0.891075
SF3B6	0.128748	0.114755	0.696	0.652	1	SF3B6	0.89026
RABEP2	0.129044	-0.0609908	0.058	0.107	1	RABEP2	0.889262
TNKS2	0.129265	-0.107261	0.217	0.289	1	TNKS2	0.888518
ANKH	0.129347	-0.0815328	0.232	0.31	1	ANKH	0.888245
POLDIP2	0.129441	0.0943574	0.174	0.118	1	POLDIP2	0.887928
BLZF1	0.129526	0.0698003	0.138	0.086	1	BLZF1	0.887644
PRPS1	0.129833	0.105141	0.239	0.171	1	PRPS1	0.886615
GSTK1	0.129979	0.0851801	0.826	0.765	1	GSTK1	0.886126
LRPAP1	0.130001	0.116487	0.536	0.465	1	LRPAP1	0.886052
CNOT7	0.13007	-0.144782	0.348	0.406	1	CNOT7	0.885824
SUPT20H	0.130138	-0.103169	0.203	0.283	1	SUPT20H	0.885595
ASTE1	0.130159	0.112028	0.101	0.059	1	ASTE1	0.885527
TXNL4A	0.130645	-0.069374	0.413	0.481	1	TXNL4A	0.883906
FAM104B	0.130649	-0.0584554	0.065	0.118	1	FAM104B	0.883893
EIF2AK2	0.130877	0.202429	0.406	0.326	1	EIF2AK2	0.883136
BROX	0.130897	-0.101986	0.217	0.294	1	BROX	0.883069
MAD2L1BP	0.131357	0.0882015	0.268	0.193	1	MAD2L1BP	0.881547
POP7	0.131398	0.0856578	0.29	0.214	1	POP7	0.88141
PYM1	0.131924	0.120003	0.239	0.176	1	PYM1	0.879677
ADGRE1	0.131991	0.128149	0.159	0.102	1	ADGRE1	0.879456
EIF3D	0.132563	-0.14109	0.667	0.727	1	EIF3D	0.877579
MED11	0.132718	0.116236	0.312	0.235	1	MED11	0.877069
IFI16	0.132816	0.126786	0.754	0.642	1	IFI16	0.876749
GXYLT1	0.133066	0.0834789	0.109	0.064	1	GXYLT1	0.875934
TSSC4	0.133095	-0.0564187	0.362	0.444	1	TSSC4	0.875838
NAE1	0.133104	-0.118479	0.275	0.358	1	NAE1	0.875808
RAD1	0.133723	0.0561374	0.181	0.118	1	RAD1	0.873795
CCT7	0.134144	0.157443	0.543	0.471	1	CCT7	0.872427
PITPNM1	0.134267	0.0986267	0.123	0.075	1	PITPNM1	0.87203
SOS1	0.13428	0.102388	0.297	0.235	1	SOS1	0.87199
ADD1	0.134542	0.121062	0.486	0.444	1	ADD1	0.871142
JOSD2	0.134682	-0.0585293	0.225	0.289	1	JOSD2	0.870691
UPF3B	0.134892	0.075163	0.203	0.139	1	UPF3B	0.870015
ITCH	0.134892	-0.107858	0.13	0.193	1	ITCH	0.870015
NDUFAF8	0.134896	0.0898974	0.37	0.299	1	NDUFAF8	0.870002
CD151	0.134953	-0.0882431	0.065	0.112	1	CD151	0.869817
OAS2	0.135693	0.101404	0.29	0.214	1	OAS2	0.867443
TAF1D	0.135793	0.0864208	0.572	0.497	1	TAF1D	0.867124
ACLY	0.135932	0.115186	0.181	0.123	1	ACLY	0.866679
KANSL3	0.136105	0.0566565	0.123	0.075	1	KANSL3	0.866127
SEL1L	0.136226	-0.0915814	0.145	0.209	1	SEL1L	0.865739
MAP4K4	0.13647	0.0899138	0.333	0.251	1	MAP4K4	0.864964
KPNB1	0.136477	-0.151251	0.471	0.54	1	KPNB1	0.864941
USP11	0.136483	0.0784538	0.116	0.07	1	USP11	0.864921
EIPR1	0.13656	-0.085982	0.109	0.166	1	EIPR1	0.864675
MT-CO3	0.13656	-0.046089	1	1	1	MT-CO3	0.864675
ZZEF1	0.136582	-0.0894472	0.087	0.139	1	ZZEF1	0.864606
DENND2D	0.137386	0.0619931	0.529	0.428	1	DENND2D	0.862059
NGLY1	0.137483	0.0989143	0.217	0.16	1	NGLY1	0.861752
ANXA11	0.137615	0.11945	0.638	0.588	1	ANXA11	0.861335
MRPL32	0.13771	-0.106158	0.304	0.374	1	MRPL32	0.861036
TNFRSF1B	0.137838	-0.119329	0.783	0.802	1	TNFRSF1B	0.860631
TRMT10B	0.137935	-0.0613904	0.058	0.107	1	TRMT10B	0.860326
CCDC47	0.137989	0.101838	0.29	0.225	1	CCDC47	0.860156
OSTM1	0.138061	0.114576	0.29	0.23	1	OSTM1	0.859929
MIGA1	0.138211	-0.0747768	0.094	0.15	1	MIGA1	0.859457
ELMSAN1	0.138443	0.0966917	0.196	0.139	1	ELMSAN1	0.85873
PSMD14	0.138593	0.147839	0.413	0.353	1	PSMD14	0.858258
KBTBD2	0.138682	-0.0835824	0.08	0.134	1	KBTBD2	0.857979
SYNE2	0.139005	0.0984971	0.964	0.893	1	SYNE2	0.856968
TRAF5	0.139083	0.114885	0.362	0.289	1	TRAF5	0.856725
LAMP2	0.139388	-0.100037	0.275	0.348	1	LAMP2	0.855774
NASP	0.139438	-0.0527814	0.384	0.465	1	NASP	0.855619
LINC01588	0.139599	0.0852804	0.101	0.059	1	LINC01588	0.855119
RAB39B	0.139599	0.0830354	0.101	0.059	1	RAB39B	0.855119
PDCD7	0.139636	-0.089126	0.261	0.342	1	PDCD7	0.855001
MIF	0.139787	-0.0763895	0.384	0.487	1	MIF	0.854533
PMVK	0.139901	0.0971125	0.319	0.251	1	PMVK	0.854179
RBMX2	0.140265	0.110467	0.261	0.193	1	RBMX2	0.853051
DEF6	0.140292	-0.0945665	0.406	0.476	1	DEF6	0.852968
SCAMP1	0.140293	0.0801299	0.101	0.059	1	SCAMP1	0.852965
LPIN2	0.140404	0.105899	0.435	0.353	1	LPIN2	0.852619
TEFM	0.140556	0.0851695	0.196	0.134	1	TEFM	0.85215
PTP4A1	0.140564	-0.121675	0.116	0.171	1	PTP4A1	0.852127
CAPG	0.14075	-0.0664151	0.152	0.225	1	CAPG	0.851551
NAAA	0.140773	-0.123141	0.217	0.283	1	NAAA	0.851481
SMIM27	0.141134	-0.117374	0.08	0.128	1	SMIM27	0.85037
IRS2	0.14131	-0.0895189	0.058	0.102	1	IRS2	0.849828
PSMB8	0.141348	0.0838777	0.928	0.85	1	PSMB8	0.84971
EFTUD2	0.141495	-0.103471	0.094	0.144	1	EFTUD2	0.849259
CDK11A	0.141598	0.0942687	0.254	0.182	1	CDK11A	0.848944
ZSCAN16	0.141645	0.0709074	0.116	0.07	1	ZSCAN16	0.848799
MED10	0.141753	-0.0862347	0.384	0.481	1	MED10	0.848468
ANAPC5	0.141785	0.145971	0.558	0.497	1	ANAPC5	0.84837
SLC33A1	0.141917	-0.081191	0.065	0.112	1	SLC33A1	0.847965
MT-CYB	0.14264	-0.0572927	1	1	1	MT-CYB	0.845759
ARMC10	0.142755	0.127603	0.196	0.144	1	ARMC10	0.84541
DHDDS	0.143203	-0.100181	0.094	0.144	1	DHDDS	0.844049
TRNAU1AP	0.143499	0.0868891	0.261	0.187	1	TRNAU1AP	0.843151
DNAJC3	0.143507	0.091764	0.304	0.241	1	DNAJC3	0.843126
LAYN	0.143572	0.127982	0.239	0.171	1	LAYN	0.842929
EBAG9	0.143663	-0.0992711	0.145	0.214	1	EBAG9	0.842656
GOLGA8A	0.143732	-0.126708	0.138	0.198	1	GOLGA8A	0.842447
TGDS	0.14382	0.0781083	0.13	0.08	1	TGDS	0.842181
ERGIC1	0.144	-0.0688238	0.101	0.16	1	ERGIC1	0.841639
SNRK	0.14435	-0.130524	0.203	0.267	1	SNRK	0.840583
TGS1	0.144404	-0.0711255	0.217	0.289	1	TGS1	0.840419
NDUFB10	0.14448	-0.104105	0.688	0.727	1	NDUFB10	0.840191
MAPK1	0.144481	0.113553	0.283	0.225	1	MAPK1	0.840189
PPP1R18	0.144629	-0.0791507	0.63	0.738	1	PPP1R18	0.839746
PLEKHF2	0.144767	0.0639236	0.138	0.086	1	PLEKHF2	0.839329
TRPT1	0.145173	-0.0762976	0.065	0.112	1	TRPT1	0.838116
PGRMC1	0.145238	0.0887398	0.232	0.166	1	PGRMC1	0.83792
SERPINB9	0.14524	-0.0162223	0.275	0.364	1	SERPINB9	0.837913
PGAP1	0.145703	0.0732102	0.13	0.08	1	PGAP1	0.836531
SIKE1	0.145717	0.0843504	0.232	0.166	1	SIKE1	0.836491
POC1B	0.14583	-0.0731979	0.065	0.112	1	POC1B	0.836152
DPP4	0.14594	0.0737254	0.101	0.059	1	DPP4	0.835826
F5	0.14617	-0.108186	0.181	0.257	1	F5	0.835143
ARHGAP25	0.146581	-0.120771	0.341	0.417	1	ARHGAP25	0.833922
GIMAP2	0.146624	0.0885675	0.413	0.321	1	GIMAP2	0.833795
GNA13	0.1468	0.104047	0.203	0.144	1	GNA13	0.833274
MSH3	0.146816	-0.0860454	0.13	0.193	1	MSH3	0.833227
FTSJ3	0.146838	-0.0745108	0.123	0.182	1	FTSJ3	0.833162
MCM7	0.146955	0.0864374	0.116	0.07	1	MCM7	0.832816
MRPS26	0.146974	-0.093094	0.217	0.294	1	MRPS26	0.83276
CLEC2B	0.147236	0.175243	0.507	0.444	1	CLEC2B	0.831986
RPS5	0.147251	-0.0574723	1	1	1	RPS5	0.831942
TMEM208	0.147297	-0.0954275	0.399	0.481	1	TMEM208	0.831805
C15orf53	0.147333	-0.14071	0.203	0.257	1	C15orf53	0.8317
ABCF2.1	0.147629	0.0667637	0.116	0.07	1	ABCF2.1	0.830827
PPP1R12C	0.147689	0.0511803	0.145	0.091	1	PPP1R12C	0.830651
TRAFD1	0.147833	0.125176	0.109	0.064	1	TRAFD1	0.830228
CELF2	0.14785	-0.104037	0.58	0.631	1	CELF2	0.830179
NECAP2	0.14785	-0.0689211	0.551	0.652	1	NECAP2	0.830178
COMMD2	0.147888	-0.0924963	0.232	0.299	1	COMMD2	0.830067
SLFN12L	0.147948	0.133175	0.348	0.283	1	SLFN12L	0.82989
TALDO1	0.148085	-0.0546199	0.645	0.706	1	TALDO1	0.82949
ZNF821	0.148102	0.0919112	0.101	0.059	1	ZNF821	0.829439
ANKRD28	0.148102	0.0779784	0.101	0.059	1	ANKRD28	0.829439
PLIN2	0.148219	-0.102288	0.304	0.39	1	PLIN2	0.829097
FBXL8	0.148306	0.0735144	0.116	0.07	1	FBXL8	0.828841
KDM6A	0.148354	0.0823601	0.174	0.118	1	KDM6A	0.828702
APOL1	0.148354	0.0794357	0.174	0.118	1	APOL1	0.828702
GALK1	0.148826	0.0932518	0.145	0.096	1	GALK1	0.827322
TDP1	0.148985	0.0849588	0.116	0.07	1	TDP1	0.826857
CSNK1G1	0.149204	0.0868634	0.13	0.086	1	CSNK1G1	0.826221
SMC3	0.149537	-0.160829	0.601	0.62	1	SMC3	0.825252
CFAP36	0.149549	-0.12055	0.152	0.203	1	CFAP36	0.825216
TOX	0.149691	0.107294	0.232	0.171	1	TOX	0.824803
ASB8	0.149804	-0.0589525	0.203	0.273	1	ASB8	0.824478
GNPTAB	0.149999	-0.133579	0.391	0.46	1	GNPTAB	0.823911
CDK11B	0.150009	0.107285	0.21	0.155	1	CDK11B	0.823882
USP33	0.150013	0.106888	0.304	0.23	1	USP33	0.823872
NSUN2	0.150034	0.074018	0.145	0.096	1	NSUN2	0.82381
MALT1	0.150094	-0.109466	0.239	0.31	1	MALT1	0.823636
PIGL	0.150294	-0.0806398	0.058	0.102	1	PIGL	0.823059
NCOR2	0.150458	0.0932218	0.181	0.128	1	NCOR2	0.822584
RFLNB	0.150612	-0.119604	0.261	0.337	1	RFLNB	0.822139
PPP1R7	0.150622	0.0518799	0.551	0.455	1	PPP1R7	0.82211
CDK5RAP2	0.150808	-0.0892193	0.145	0.209	1	CDK5RAP2	0.821576
HACD2	0.150845	0.0849201	0.123	0.075	1	HACD2	0.82147
ZDHHC24	0.150883	0.105385	0.312	0.251	1	ZDHHC24	0.82136
LRRC59	0.15158	0.0914346	0.254	0.193	1	LRRC59	0.819358
DIP2A	0.151719	-0.145486	0.319	0.39	1	DIP2A	0.81896
ZCCHC7	0.152016	-0.0760506	0.13	0.193	1	ZCCHC7	0.818111
TSC22D3	0.152179	-0.150761	0.239	0.305	1	TSC22D3	0.817644
TRIM56	0.15218	0.121856	0.391	0.326	1	TRIM56	0.817644
RSBN1L	0.152183	-0.0965185	0.471	0.561	1	RSBN1L	0.817633
RRP1	0.15225	-0.0827908	0.08	0.128	1	RRP1	0.817444
ZNF605	0.152428	-0.0921034	0.058	0.102	1	ZNF605	0.816936
BFSP2	0.152499	0.0720514	0.101	0.059	1	BFSP2	0.816732
IQGAP1	0.152704	-0.0574465	0.536	0.642	1	IQGAP1	0.816148
MX2	0.153063	0.0952572	0.261	0.193	1	MX2	0.815129
KIAA1109	0.15312	0.0694795	0.37	0.294	1	KIAA1109	0.814967
SMG5	0.153242	0.0458326	0.101	0.059	1	SMG5	0.814623
RPL24	0.153346	-0.0432376	1	1	1	RPL24	0.814328
MICU1	0.153508	-0.106361	0.116	0.171	1	MICU1	0.813869
VRK3	0.153862	0.0845812	0.217	0.155	1	VRK3	0.812868
KANSL1-AS1	0.153987	0.0557512	0.101	0.059	1	KANSL1-AS1	0.812516
ESYT1	0.154027	-0.115184	0.283	0.337	1	ESYT1	0.812404
NDUFA1	0.15403	-0.117134	0.623	0.684	1	NDUFA1	0.812396
CPNE2	0.154224	0.089236	0.109	0.064	1	CPNE2	0.811849
MRPS10	0.154346	0.0793688	0.341	0.267	1	MRPS10	0.811503
PARG	0.154503	0.0632978	0.116	0.07	1	PARG	0.811062
NVL	0.154585	-0.0814346	0.058	0.102	1	NVL	0.810834
LXN	0.154782	-0.0826007	0.101	0.155	1	LXN	0.810279
NDUFA13	0.15497	-0.095618	0.464	0.54	1	NDUFA13	0.809753
ITGA4	0.155126	0.111449	0.667	0.604	1	ITGA4	0.809314
JMY	0.155157	0.0964332	0.188	0.134	1	JMY	0.809228
RNMT	0.155384	-0.132642	0.333	0.412	1	RNMT	0.808593
IL2RG	0.155391	-0.0693127	0.804	0.861	1	IL2RG	0.808573
NDUFC1	0.155895	0.124899	0.551	0.476	1	NDUFC1	0.807167
SNRPF	0.15595	0.128107	0.587	0.529	1	SNRPF	0.807015
SRSF8	0.156005	-0.100547	0.333	0.406	1	SRSF8	0.806861
GBA2	0.156068	0.0516158	0.13	0.08	1	GBA2	0.806686
ADAM19	0.156183	-0.105035	0.145	0.203	1	ADAM19	0.806367
LINC01184	0.156247	0.053557	0.123	0.075	1	LINC01184	0.806188
COG1	0.156247	0.0525426	0.123	0.075	1	COG1	0.806188
ACSS1	0.156315	-0.0936144	0.116	0.171	1	ACSS1	0.805998
GLB1	0.156653	-0.0750792	0.174	0.241	1	GLB1	0.805061
SMNDC1	0.156718	0.102593	0.29	0.214	1	SMNDC1	0.804882
NFKBIE	0.156748	-0.0915376	0.08	0.128	1	NFKBIE	0.804798
AC009403.1	0.156748	0.0485901	0.138	0.086	1	AC009403.1	0.804797
PSMA7	0.156766	0.0634315	0.964	0.92	1	PSMA7	0.804749
PCF11	0.15685	-0.111128	0.283	0.348	1	PCF11	0.804516
ADRM1	0.156983	0.144989	0.493	0.449	1	ADRM1	0.804147
HTT	0.157115	-0.0892111	0.138	0.198	1	HTT	0.803783
TMOD3	0.157264	0.0999874	0.543	0.465	1	TMOD3	0.80337
SMIM12	0.157453	-0.0789114	0.21	0.289	1	SMIM12	0.80285
FCRL3	0.157551	0.0464939	0.275	0.198	1	FCRL3	0.802578
IL32	0.15769	-0.066671	1	1	1	IL32	0.802196
MUT	0.157726	0.0941986	0.138	0.091	1	MUT	0.802098
SLC30A5	0.157987	-0.0815242	0.109	0.166	1	SLC30A5	0.801377
ANKRD44	0.158255	0.0975752	0.493	0.422	1	ANKRD44	0.800643
AC005921.2	0.158703	0.0835041	0.145	0.096	1	AC005921.2	0.799414
GTF2H3	0.158707	-0.0747494	0.08	0.128	1	GTF2H3	0.799405
NINJ1	0.15884	-0.0677216	0.21	0.278	1	NINJ1	0.799041
CMPK1	0.158939	-0.078011	0.486	0.567	1	CMPK1	0.79877
UBQLN2	0.159341	0.12602	0.21	0.155	1	UBQLN2	0.797672
RETREG1	0.159476	0.0949637	0.174	0.123	1	RETREG1	0.797304
KRTCAP2	0.159482	0.0933662	0.442	0.358	1	KRTCAP2	0.797287
RPL13A	0.159631	-0.0613404	1	1	1	RPL13A	0.796883
BRIX1	0.159638	-0.14041	0.174	0.225	1	BRIX1	0.796865
METTL2B	0.159669	0.0867166	0.138	0.091	1	METTL2B	0.79678
PLCL1	0.159869	-0.0673259	0.123	0.182	1	PLCL1	0.796236
AHSA1	0.159881	0.121886	0.377	0.321	1	AHSA1	0.796203
R3HDM2	0.160003	0.0805427	0.261	0.187	1	R3HDM2	0.795873
CNOT2	0.160342	-0.0675105	0.283	0.374	1	CNOT2	0.794952
H2AFY	0.160638	0.0929189	0.572	0.529	1	H2AFY	0.794152
DDX60L	0.16064	0.0824335	0.217	0.155	1	DDX60L	0.794145
CEP128	0.160684	-0.0543294	0.08	0.128	1	CEP128	0.794028
DPP7	0.160716	-0.0617095	0.601	0.69	1	DPP7	0.79394
IL6R	0.160755	0.0881292	0.159	0.107	1	IL6R	0.793837
TUBGCP2	0.16076	0.152559	0.304	0.251	1	TUBGCP2	0.793822
2020-09-01	0.160761	-0.127989	0.514	0.567	1	2020-09-01	0.793821
M6PR	0.161091	0.122196	0.572	0.508	1	M6PR	0.792929
TRIP11	0.161107	-0.0653732	0.304	0.417	1	TRIP11	0.792885
ASB16-AS1	0.161194	-0.0606394	0.058	0.102	1	ASB16-AS1	0.79265
PDZD8	0.161247	0.0391529	0.152	0.096	1	PDZD8	0.792509
BCL10	0.161321	-0.106276	0.138	0.193	1	BCL10	0.79231
LSM10	0.16133	-0.0885376	0.413	0.503	1	LSM10	0.792286
AC245060.5	0.161591	0.0781321	0.101	0.059	1	AC245060.5	0.791582
SIT1	0.16161	-0.14461	0.652	0.668	1	SIT1	0.791532
KLHL7	0.161618	0.0535627	0.116	0.07	1	KLHL7	0.79151
GLUD1	0.161875	0.058457	0.275	0.198	1	GLUD1	0.79082
NSD3	0.161945	-0.0865912	0.79	0.84	1	NSD3	0.790633
STOM	0.161981	0.075406	0.159	0.107	1	STOM	0.790536
SLC35A3	0.162235	-0.0460214	0.094	0.15	1	SLC35A3	0.789856
VAPA	0.162479	-0.065919	0.493	0.604	1	VAPA	0.789203
AP1G1	0.162652	0.0945714	0.196	0.139	1	AP1G1	0.788742
MMGT1	0.162706	-0.0918141	0.065	0.107	1	MMGT1	0.788596
PQBP1	0.162836	-0.0886077	0.275	0.348	1	PQBP1	0.788249
EMC4	0.163351	0.19939	0.304	0.241	1	EMC4	0.786877
DDX24	0.163571	0.139006	0.841	0.818	1	DDX24	0.786294
MRPL14	0.163715	-0.111546	0.37	0.422	1	MRPL14	0.78591
ARPC2	0.164108	0.061216	0.993	0.989	1	ARPC2	0.784869
PREP	0.1642	-0.0640536	0.058	0.102	1	PREP	0.784628
DDA1	0.164239	-0.0923517	0.217	0.278	1	DDA1	0.784525
ARGLU1	0.164263	0.109823	0.725	0.679	1	ARGLU1	0.784461
BCL7C	0.164284	0.0803305	0.428	0.348	1	BCL7C	0.784405
CCDC130	0.164393	0.0954388	0.239	0.182	1	CCDC130	0.784117
XIAP	0.164408	0.142809	0.333	0.273	1	XIAP	0.784077
AKAP10	0.165027	-0.0881507	0.101	0.155	1	AKAP10	0.782444
ZNRF1	0.165385	0.12585	0.246	0.187	1	ZNRF1	0.781505
GOLGB1	0.165532	-0.144148	0.5	0.535	1	GOLGB1	0.781119
PSMA1	0.166256	-0.086817	0.645	0.711	1	PSMA1	0.779222
NIPSNAP1	0.166271	0.0620488	0.174	0.118	1	NIPSNAP1	0.779183
CTC1	0.166277	0.0954848	0.138	0.091	1	CTC1	0.779168
PRIM1	0.166481	-0.0577228	0.058	0.102	1	PRIM1	0.778635
PAXX	0.16669	0.128287	0.507	0.471	1	PAXX	0.778089
PIAS2	0.166726	-0.0819092	0.08	0.128	1	PIAS2	0.777996
GBA	0.166763	0.0835276	0.123	0.08	1	GBA	0.777899
POLR2C	0.166769	-0.0785976	0.239	0.316	1	POLR2C	0.777885
GID8	0.166818	-0.0785048	0.167	0.23	1	GID8	0.777756
IL10RA	0.167086	0.0928597	0.826	0.802	1	IL10RA	0.77706
CARHSP1	0.167104	0.0978506	0.478	0.433	1	CARHSP1	0.777014
PPP4R3A	0.167131	-0.0652764	0.341	0.417	1	PPP4R3A	0.776943
CEP104	0.167473	-0.0829461	0.072	0.118	1	CEP104	0.776055
MRPL10	0.167741	-0.130035	0.116	0.166	1	MRPL10	0.775361
CCDC117	0.167876	0.0546577	0.101	0.059	1	CCDC117	0.775011
UQCRC2	0.167988	-0.103624	0.435	0.503	1	UQCRC2	0.774723
DDX46	0.168232	-0.0748701	0.616	0.69	1	DDX46	0.774091
DNAJB11	0.168471	0.0734209	0.239	0.171	1	DNAJB11	0.773475
R3HDM4	0.168536	0.0671872	0.428	0.342	1	R3HDM4	0.773309
FOXO1	0.168536	0.0738112	0.384	0.299	1	FOXO1	0.773307
KDM5B	0.168638	-0.103556	0.239	0.31	1	KDM5B	0.773044
UMPS	0.168778	-0.0617889	0.08	0.128	1	UMPS	0.772684
MTO1	0.168801	0.0816169	0.152	0.102	1	MTO1	0.772625
TFRC	0.168883	0.0842974	0.217	0.16	1	TFRC	0.772414
AAMP	0.168888	0.0875067	0.196	0.139	1	AAMP	0.772401
CCSER2	0.169172	-0.0846974	0.333	0.412	1	CCSER2	0.771672
CCT3	0.169246	-0.112202	0.594	0.679	1	CCT3	0.77148
LMF2	0.169395	0.108784	0.268	0.209	1	LMF2	0.7711
C1orf56	0.169905	-0.0739366	0.377	0.455	1	C1orf56	0.769794
TAF10	0.169962	-0.10032	0.601	0.647	1	TAF10	0.769647
SP100	0.170221	0.164722	0.696	0.695	1	SP100	0.768986
MRPS18C	0.170304	0.113077	0.457	0.38	1	MRPS18C	0.768775
PUM1	0.170443	-0.097076	0.246	0.316	1	PUM1	0.76842
DNMT1	0.170691	-0.0947458	0.384	0.46	1	DNMT1	0.767789
APLP2	0.170987	0.0879567	0.29	0.225	1	APLP2	0.767037
GTPBP4	0.171355	-0.116164	0.283	0.364	1	GTPBP4	0.766103
FOXK1	0.171407	0.0688372	0.152	0.102	1	FOXK1	0.76597
TPT1	0.171656	-0.0420306	1	1	1	TPT1	0.765341
RAB35	0.171683	-0.116207	0.145	0.198	1	RAB35	0.765274
PIK3C2A	0.171739	-0.0530064	0.087	0.139	1	PIK3C2A	0.765131
NMD3	0.17177	-0.0537221	0.094	0.15	1	NMD3	0.765052
RAB1A	0.171829	-0.0588992	0.181	0.251	1	RAB1A	0.764905
MIR3142HG	0.171968	-0.134889	0.217	0.278	1	MIR3142HG	0.764553
EIF4G2	0.172165	0.103924	0.645	0.62	1	EIF4G2	0.764054
NLRC5	0.172181	-0.0817996	0.188	0.257	1	NLRC5	0.764015
AP1M1	0.172196	-0.0975308	0.13	0.182	1	AP1M1	0.763977
C14orf119	0.17231	-0.0757944	0.341	0.433	1	C14orf119	0.76369
USP3	0.172396	0.0996599	0.37	0.305	1	USP3	0.763472
GSK3B	0.172458	0.0940126	0.21	0.155	1	GSK3B	0.763316
PPM1A	0.172622	-0.0703521	0.145	0.209	1	PPM1A	0.762904
TLE3	0.17306	-0.134417	0.138	0.187	1	TLE3	0.761803
CTSH	0.173133	-0.0891092	0.138	0.198	1	CTSH	0.76162
COX7A2L	0.173219	-0.0863442	0.601	0.658	1	COX7A2L	0.761405
SLC35A1	0.173306	0.0888032	0.116	0.075	1	SLC35A1	0.761188
TMEM106B	0.173428	-0.113169	0.203	0.257	1	TMEM106B	0.76088
SS18L2	0.173885	-0.106193	0.442	0.508	1	SS18L2	0.759738
DDHD1	0.174347	0.142166	0.551	0.529	1	DDHD1	0.758585
SLC7A6OS	0.174722	-0.0879445	0.261	0.326	1	SLC7A6OS	0.757653
LYST	0.17511	0.0973164	0.413	0.342	1	LYST	0.756688
DGKE	0.175235	0.114542	0.297	0.246	1	DGKE	0.756379
RIC8A	0.175302	0.0950097	0.196	0.139	1	RIC8A	0.756213
SQOR	0.175526	0.093999	0.428	0.369	1	SQOR	0.755659
IWS1	0.175536	0.11661	0.312	0.246	1	IWS1	0.755635
GABPB1	0.175719	0.153955	0.21	0.16	1	GABPB1	0.755181
SEC11C	0.175726	-0.112744	0.507	0.578	1	SEC11C	0.755165
RBPJ	0.17583	-0.105192	0.304	0.385	1	RBPJ	0.754908
GPATCH4	0.17586	0.0984702	0.21	0.155	1	GPATCH4	0.754832
KIF1BP	0.175871	0.100619	0.138	0.091	1	KIF1BP	0.754806
POLR3A	0.17591	0.103862	0.109	0.07	1	POLR3A	0.754709
DYNC1I2	0.176132	-0.0668369	0.261	0.326	1	DYNC1I2	0.754161
SRP9	0.176393	-0.0831037	0.732	0.797	1	SRP9	0.753518
HTRA2	0.177083	0.0716347	0.196	0.139	1	HTRA2	0.751824
CMTM8	0.177172	0.0612413	0.145	0.096	1	CMTM8	0.751606
SLC25A45	0.177195	0.0900729	0.268	0.203	1	SLC25A45	0.751549
KIF1C	0.177685	-0.0818021	0.08	0.123	1	KIF1C	0.750349
POLG	0.177855	-0.0130301	0.065	0.112	1	POLG	0.749933
AGPS	0.178152	-0.0767037	0.13	0.182	1	AGPS	0.74921
SET	0.178341	0.0765926	0.87	0.861	1	SET	0.748748
CMTR2	0.178345	0.0423092	0.188	0.128	1	CMTR2	0.74874
ZNF512	0.178394	-0.0578085	0.072	0.118	1	ZNF512	0.748619
BET1	0.178394	-0.0614061	0.072	0.118	1	BET1	0.748619
ZFP14	0.17841	0.134676	0.217	0.166	1	ZFP14	0.748582
ZNF830	0.17841	-0.0793864	0.239	0.31	1	ZNF830	0.74858
NIT1	0.178604	-0.0623925	0.08	0.128	1	NIT1	0.748109
C8orf59	0.178749	-0.0961831	0.399	0.476	1	C8orf59	0.747757
ICMT	0.179053	-0.0444578	0.058	0.102	1	ICMT	0.747018
SCAMP4	0.179322	-0.0652898	0.08	0.128	1	SCAMP4	0.746368
DDX20	0.17937	0.0879571	0.145	0.102	1	DDX20	0.74625
YWHAZ	0.179442	-0.0798528	0.833	0.909	1	YWHAZ	0.746076
OAZ1	0.17946	0.0463051	0.986	1	1	OAZ1	0.746031
TMEM18	0.179495	0.103619	0.188	0.134	1	TMEM18	0.745948
NUDC	0.179501	-0.117581	0.457	0.535	1	NUDC	0.745933
MYC	0.179778	-0.0849093	0.13	0.187	1	MYC	0.745263
TIMP1	0.180021	0.143498	0.601	0.578	1	TIMP1	0.744677
B3GAT3	0.180957	0.143907	0.333	0.278	1	B3GAT3	0.742425
TUBA1A	0.181133	-0.0578044	0.341	0.428	1	TUBA1A	0.742003
CNBP	0.181256	-0.0856067	0.725	0.775	1	CNBP	0.741708
RIOK3	0.18141	-0.047866	0.29	0.369	1	RIOK3	0.741338
E2F6	0.181714	0.128969	0.116	0.075	1	E2F6	0.740612
CYTH1	0.181773	-0.152293	0.341	0.396	1	CYTH1	0.74047
SETD6	0.181895	0.0371431	0.109	0.064	1	SETD6	0.740179
HP1BP3	0.182106	-0.0683889	0.594	0.642	1	HP1BP3	0.739675
DPH7	0.182135	0.0528069	0.152	0.102	1	DPH7	0.739606
FOXO3	0.18215	0.099308	0.123	0.08	1	FOXO3	0.73957
MFSD5	0.18215	0.0744006	0.123	0.08	1	MFSD5	0.73957
DNAJC13	0.182336	0.108893	0.159	0.112	1	DNAJC13	0.739127
DHRS7	0.182607	-0.110594	0.442	0.508	1	DHRS7	0.738482
HCCS	0.182943	-0.0536387	0.08	0.128	1	HCCS	0.737685
GFI1	0.183068	0.138217	0.109	0.07	1	GFI1	0.737388
RBM38	0.183273	-0.0849656	0.326	0.412	1	RBM38	0.736901
WDR60	0.183275	0.110467	0.116	0.075	1	WDR60	0.736897
PHKG2	0.183348	0.0711622	0.167	0.112	1	PHKG2	0.736724
EIF2AK1	0.183367	-0.0986694	0.261	0.332	1	EIF2AK1	0.736679
USO1	0.183551	-0.0756991	0.21	0.283	1	USO1	0.736244
FBXO11	0.18397	-0.0732848	0.087	0.134	1	FBXO11	0.735253
UBALD1	0.184046	-0.06731	0.065	0.107	1	UBALD1	0.735074
ABCG1	0.184046	-0.0809359	0.065	0.107	1	ABCG1	0.735074
ORMDL1	0.184444	0.0933552	0.616	0.572	1	ORMDL1	0.734135
ZMYND8	0.184478	0.038229	0.239	0.166	1	ZMYND8	0.734056
AP3M1	0.1846	0.0557809	0.159	0.107	1	AP3M1	0.733769
CNOT8	0.184879	-0.103493	0.13	0.182	1	CNOT8	0.733113
SAR1B	0.185827	-0.0662024	0.261	0.337	1	SAR1B	0.730892
MRPL51	0.185956	0.0505675	0.739	0.62	1	MRPL51	0.73059
PLD3	0.186272	0.0640944	0.145	0.096	1	PLD3	0.729853
RFX5	0.186359	0.0987794	0.159	0.112	1	RFX5	0.72965
DGAT1	0.186461	-0.0709019	0.152	0.214	1	DGAT1	0.729412
ALG8	0.186565	-0.0664506	0.116	0.171	1	ALG8	0.729171
QARS	0.186927	-0.0821403	0.217	0.278	1	QARS	0.728329
INSIG2	0.186986	-0.0184661	0.087	0.139	1	INSIG2	0.728192
ZNF121	0.186988	-0.0591964	0.08	0.128	1	ZNF121	0.728186
TFCP2	0.187326	-0.0811843	0.101	0.15	1	TFCP2	0.727401
MFSD8	0.187332	0.0478856	0.152	0.102	1	MFSD8	0.727388
KLHL2	0.187562	0.0802931	0.21	0.155	1	KLHL2	0.726855
IZUMO4	0.187702	0.0704066	0.145	0.096	1	IZUMO4	0.726532
CCDC88C	0.187747	-0.0899052	0.312	0.38	1	CCDC88C	0.726427
SENP6	0.187927	0.129455	0.355	0.289	1	SENP6	0.726011
G3BP1	0.188152	0.141606	0.551	0.535	1	G3BP1	0.725492
PSMB5	0.188309	-0.106224	0.312	0.358	1	PSMB5	0.72513
LARP1	0.18884	0.124811	0.326	0.267	1	LARP1	0.723907
YWHAG	0.189066	0.166759	0.167	0.123	1	YWHAG	0.723386
ATP5ME	0.189194	-0.067798	0.529	0.594	1	ATP5ME	0.723092
POLR2A	0.189269	-0.048031	0.174	0.235	1	POLR2A	0.722921
FBXW5	0.189432	0.0787579	0.529	0.455	1	FBXW5	0.722547
PPAN	0.189691	-0.070443	0.065	0.107	1	PPAN	0.721953
NMT1	0.189736	-0.103046	0.203	0.257	1	NMT1	0.72185
FAM19A2	0.189794	0.0601427	0.152	0.102	1	FAM19A2	0.721717
ARFGAP2	0.189842	0.0781139	0.326	0.267	1	ARFGAP2	0.721608
OAS1	0.19007	0.16772	0.297	0.241	1	OAS1	0.721086
TBCB	0.190398	0.11294	0.514	0.481	1	TBCB	0.720338
TAF13	0.190422	0.070787	0.116	0.075	1	TAF13	0.720284
DUSP12	0.190532	0.0830073	0.196	0.144	1	DUSP12	0.720033
ELMOD2	0.190619	-0.0551327	0.072	0.118	1	ELMOD2	0.719835
ZBP1	0.191155	0.103546	0.188	0.139	1	ZBP1	0.718613
ECHS1	0.191179	0.0787562	0.377	0.31	1	ECHS1	0.718559
GGNBP2	0.191371	0.0756372	0.464	0.385	1	GGNBP2	0.718124
ING3	0.191473	-0.0947007	0.101	0.15	1	ING3	0.717894
ME2	0.191504	-0.0442624	0.21	0.289	1	ME2	0.717823
PRELID3B	0.191526	-0.064929	0.181	0.257	1	PRELID3B	0.717771
LYRM2	0.191628	0.114209	0.268	0.214	1	LYRM2	0.71754
TTF2	0.191948	-0.100477	0.109	0.16	1	TTF2	0.716817
NDUFA4	0.192023	0.0967861	0.949	0.888	1	NDUFA4	0.716646
MBD4	0.192468	0.098206	0.341	0.267	1	MBD4	0.715642
ZNF652	0.192552	-0.0668821	0.123	0.176	1	ZNF652	0.715453
ARHGEF2	0.192685	0.10757	0.297	0.241	1	ARHGEF2	0.715152
UBXN1	0.192735	-0.0579651	0.826	0.818	1	UBXN1	0.71504
SEPHS2	0.193018	0.0956819	0.42	0.358	1	SEPHS2	0.714401
UBR1	0.193028	-0.0834685	0.152	0.209	1	UBR1	0.714379
GNB5	0.193029	-0.0359708	0.203	0.278	1	GNB5	0.714377
DBI	0.193077	-0.085314	0.797	0.834	1	DBI	0.714269
INO80C	0.193079	-0.0492779	0.109	0.166	1	INO80C	0.714265
ATP5PF	0.193093	-0.0893165	0.783	0.791	1	ATP5PF	0.714234
CGGBP1	0.193185	-0.110243	0.261	0.321	1	CGGBP1	0.714026
RNF167	0.19343	-0.112593	0.319	0.38	1	RNF167	0.713475
EMC3	0.193728	0.12092	0.355	0.294	1	EMC3	0.712809
ARFGAP3	0.193817	-0.0555707	0.196	0.267	1	ARFGAP3	0.712607
BRWD1	0.193975	-0.113781	0.29	0.342	1	BRWD1	0.712254
NHLRC3	0.194097	0.102817	0.261	0.203	1	NHLRC3	0.711981
MCUB	0.194166	-0.108111	0.5	0.556	1	MCUB	0.711826
THEM4	0.194336	-0.0771626	0.341	0.412	1	THEM4	0.711448
WDR1	0.194412	-0.167252	0.42	0.455	1	WDR1	0.711276
ELOC	0.195261	0.105977	0.493	0.428	1	ELOC	0.709385
RNF103	0.195463	-0.0552015	0.065	0.107	1	RNF103	0.708935
APOL2	0.195471	0.0906339	0.283	0.219	1	APOL2	0.708917
AKAP8	0.19553	0.0603583	0.138	0.091	1	AKAP8	0.708787
PLP2	0.195722	0.101131	0.667	0.599	1	PLP2	0.70836
NCL	0.196012	0.0505525	0.913	0.882	1	NCL	0.707717
CNDP2	0.196118	-0.0643447	0.159	0.225	1	CNDP2	0.707482
ZSCAN32	0.19612	0.0678162	0.116	0.075	1	ZSCAN32	0.707477
HEXB	0.196675	-0.0735021	0.152	0.209	1	HEXB	0.706251
CERS5	0.196675	-0.0910981	0.152	0.209	1	CERS5	0.706251
NOA1	0.196798	-0.0475324	0.167	0.23	1	NOA1	0.70598
COMT	0.19681	0.0926385	0.413	0.332	1	COMT	0.705953
LRRC14	0.196957	0.063512	0.123	0.08	1	LRRC14	0.705628
ARPC3	0.197096	0.071147	0.993	0.979	1	ARPC3	0.705323
SLC35E2B	0.197173	0.0671448	0.109	0.07	1	SLC35E2B	0.705153
CWC15	0.197236	-0.121786	0.406	0.471	1	CWC15	0.705014
CCT6A	0.197263	0.0762045	0.609	0.508	1	CCT6A	0.704954
NT5DC1	0.197874	0.104992	0.29	0.225	1	NT5DC1	0.703612
HLA-DMA	0.197912	-0.109492	0.348	0.433	1	HLA-DMA	0.703527
RSRC2	0.198254	0.10211	0.565	0.524	1	RSRC2	0.702777
PSMB3	0.198398	0.114079	0.783	0.775	1	PSMB3	0.702463
UBA3	0.198576	0.081673	0.21	0.155	1	UBA3	0.702073
GOLGA8B	0.198598	0.0705421	0.362	0.294	1	GOLGA8B	0.702025
MAST3	0.198601	0.0504141	0.116	0.075	1	MAST3	0.702019
ORAI2	0.198636	-0.0548355	0.138	0.193	1	ORAI2	0.701942
GABPA	0.198818	-0.0593197	0.065	0.107	1	GABPA	0.701543
SLC25A37	0.198818	-0.0799715	0.065	0.107	1	SLC25A37	0.701543
DNASE2	0.198825	0.0542716	0.217	0.16	1	DNASE2	0.701528
ASNSD1	0.198851	-0.0898816	0.181	0.241	1	ASNSD1	0.701472
CHIC2	0.198878	0.0848888	0.283	0.225	1	CHIC2	0.701413
IP6K2	0.198898	0.100372	0.275	0.219	1	IP6K2	0.701369
VASP	0.199059	-0.121479	0.464	0.529	1	VASP	0.701018
CMAS	0.19909	-0.08366	0.203	0.262	1	CMAS	0.70095
LAIR1	0.199128	0.112873	0.174	0.128	1	LAIR1	0.700868
REXO1	0.199149	0.0570989	0.152	0.102	1	REXO1	0.700822
MRPL46	0.199157	-0.0730764	0.167	0.225	1	MRPL46	0.700804
SMG1	0.19965	0.079011	0.464	0.385	1	SMG1	0.69973
NKG7	0.199742	0.0426656	0.109	0.07	1	NKG7	0.69953
ARRDC2	0.199761	-0.0621193	0.167	0.23	1	ARRDC2	0.699489
GRAMD1A	0.199776	0.0893639	0.384	0.321	1	GRAMD1A	0.699457
CYB5A	0.19984	-0.0908482	0.232	0.294	1	CYB5A	0.699319
MRPS12	0.199884	-0.0858204	0.435	0.513	1	MRPS12	0.699222
NAA35	0.200184	-0.0478931	0.072	0.118	1	NAA35	0.698571
DRG2	0.200198	-0.0712013	0.087	0.134	1	DRG2	0.698539
TRPS1	0.200732	0.14188	0.217	0.171	1	TRPS1	0.697384
SERTAD1	0.200732	0.0859515	0.225	0.166	1	SERTAD1	0.697384
HNRNPH1	0.200786	-0.0668847	0.514	0.604	1	HNRNPH1	0.697267
SRPRA	0.201059	0.114593	0.413	0.337	1	SRPRA	0.696677
CLIC3	0.201119	-0.0856254	0.072	0.112	1	CLIC3	0.696546
GATC	0.201173	-0.0803621	0.08	0.123	1	GATC	0.69643
PLEC	0.201218	0.0140638	0.297	0.225	1	PLEC	0.696333
TGOLN2	0.201295	-0.0369885	0.464	0.594	1	TGOLN2	0.696168
CHD6	0.201402	0.0891759	0.21	0.155	1	CHD6	0.695936
CKLF	0.201972	0.115817	0.804	0.77	1	CKLF	0.694709
TP53	0.202132	-0.0716207	0.101	0.15	1	TP53	0.694365
2020-03-09	0.202374	0.122135	0.268	0.219	1	2020-03-09	0.693846
MDM2	0.202375	-0.0682814	0.203	0.278	1	MDM2	0.693844
NUBP1	0.202577	0.064715	0.225	0.166	1	NUBP1	0.69341
SRPK2	0.202819	0.0791104	0.493	0.385	1	SRPK2	0.692892
GMFG	0.202957	0.0847667	0.957	0.973	1	GMFG	0.692596
MRPL2	0.203195	0.117396	0.217	0.171	1	MRPL2	0.692088
SUMO4	0.203568	0.0749565	0.203	0.15	1	SUMO4	0.691291
C1orf216	0.203578	-0.0592882	0.094	0.144	1	C1orf216	0.691269
AC093323.1	0.203608	-0.0684438	0.072	0.112	1	AC093323.1	0.691205
ALOX5AP	0.203639	0.136976	0.565	0.508	1	ALOX5AP	0.691138
IMMP1L	0.203643	0.0797665	0.138	0.096	1	IMMP1L	0.691131
REL	0.203658	-0.0852583	0.297	0.358	1	REL	0.691099
RRBP1	0.203702	-0.0674544	0.217	0.283	1	RRBP1	0.691005
ZNF274	0.20372	0.07532	0.167	0.118	1	ZNF274	0.690966
FBXL3	0.204127	0.10795	0.246	0.193	1	FBXL3	0.6901
ATP6V0A2	0.204443	-0.0710022	0.072	0.112	1	ATP6V0A2	0.689429
STIM1	0.204845	-0.0792393	0.13	0.182	1	STIM1	0.688575
RABEP1	0.204918	0.043634	0.261	0.198	1	RABEP1	0.688419
SNX18	0.204955	0.0635376	0.109	0.07	1	SNX18	0.688342
NONO	0.205004	0.119488	0.449	0.38	1	NONO	0.688238
SHMT2	0.205223	0.0759343	0.399	0.348	1	SHMT2	0.687774
NUBP2	0.205273	-0.0933368	0.217	0.273	1	NUBP2	0.687668
TAOK3	0.205324	0.112889	0.529	0.449	1	TAOK3	0.68756
SNX5	0.205526	0.13967	0.464	0.412	1	SNX5	0.687134
YIPF1	0.205671	0.0667754	0.101	0.064	1	YIPF1	0.686828
ACSL4	0.206079	-0.123084	0.181	0.235	1	ACSL4	0.685966
COMMD10	0.206124	-0.0680028	0.116	0.166	1	COMMD10	0.685872
ZCCHC8	0.206143	-0.0748729	0.109	0.155	1	ZCCHC8	0.685831
CBFB	0.206164	-0.0728831	0.254	0.326	1	CBFB	0.685787
ATP5MF	0.206169	-0.0914549	0.623	0.674	1	ATP5MF	0.685776
FAM214A	0.206177	-0.0952602	0.152	0.198	1	FAM214A	0.685759
RPS6KA5	0.206181	-0.035672	0.333	0.406	1	RPS6KA5	0.685752
STARD7	0.206297	-0.0505924	0.181	0.246	1	STARD7	0.685506
STOML2	0.206427	-0.0940338	0.333	0.406	1	STOML2	0.685233
UBE2A	0.206651	-0.0786253	0.254	0.316	1	UBE2A	0.684762
UQCRQ	0.206669	-0.103056	0.413	0.46	1	UQCRQ	0.684725
DBP	0.206855	0.0798259	0.319	0.246	1	DBP	0.684335
ATP5F1D	0.206868	-0.0783227	0.783	0.856	1	ATP5F1D	0.684306
GBP5	0.20708	-0.109773	0.565	0.626	1	GBP5	0.683862
PITPNC1	0.207126	0.0997997	0.217	0.166	1	PITPNC1	0.683766
PRKRA	0.207231	-0.0727871	0.123	0.176	1	PRKRA	0.683546
CASC3	0.20733	0.0808434	0.152	0.107	1	CASC3	0.683338
TSC22D2	0.207495	0.0590877	0.101	0.064	1	TSC22D2	0.682992
DCP1B	0.207584	-0.0486482	0.072	0.118	1	DCP1B	0.682806
HEXA	0.208285	-0.0720812	0.261	0.326	1	HEXA	0.681342
NTPCR	0.208412	0.0722551	0.101	0.064	1	NTPCR	0.681077
SRA1	0.208563	-0.0797271	0.304	0.374	1	SRA1	0.680763
DOPEY2	0.208751	0.0451617	0.116	0.075	1	DOPEY2	0.680372
ADPGK	0.209367	-0.0808597	0.203	0.262	1	ADPGK	0.679092
R3HDM1	0.209503	0.0684969	0.254	0.187	1	R3HDM1	0.678809
ZNF226	0.209512	0.105301	0.225	0.171	1	ZNF226	0.678791
TSPAN14	0.21015	-0.0665047	0.377	0.481	1	TSPAN14	0.677471
TMEM42	0.2104	-0.0508755	0.101	0.155	1	TMEM42	0.676954
CIR1	0.210477	-0.100052	0.406	0.465	1	CIR1	0.676795
TMPO	0.210522	-0.126795	0.428	0.476	1	TMPO	0.676702
RITA1	0.210848	-0.0593084	0.08	0.123	1	RITA1	0.67603
TRAPPC12	0.210883	0.0807357	0.174	0.128	1	TRAPPC12	0.675959
TIMM44	0.21116	-0.0866693	0.065	0.102	1	TIMM44	0.675388
CORO7	0.211241	0.0941864	0.283	0.225	1	CORO7	0.675221
FAM192A	0.211385	0.204234	0.254	0.209	1	FAM192A	0.674926
CDR2	0.211416	-0.097212	0.188	0.246	1	CDR2	0.674863
MTREX	0.21171	-0.0852422	0.138	0.193	1	MTREX	0.674258
CNTRL	0.211757	-0.101051	0.442	0.487	1	CNTRL	0.674162
GPM6B	0.211881	0.0534202	0.159	0.112	1	GPM6B	0.673907
BTG3	0.211898	-0.0716161	0.239	0.31	1	BTG3	0.673872
WDR59	0.211899	-0.0765819	0.087	0.128	1	WDR59	0.673871
TMEM160	0.212231	0.100843	0.565	0.503	1	TMEM160	0.67319
KAT6A	0.212462	0.0526197	0.478	0.401	1	KAT6A	0.672718
RPS18	0.212663	-0.0457617	1	1	1	RPS18	0.672307
CCDC12	0.212694	-0.0635997	0.507	0.545	1	CCDC12	0.672244
ICE1	0.212915	-0.0429156	0.203	0.278	1	ICE1	0.671794
TRIP12	0.212941	0.117754	0.377	0.342	1	TRIP12	0.67174
SH3BP1	0.21297	-0.0690735	0.21	0.278	1	SH3BP1	0.671682
NSL1	0.212998	-0.0464094	0.217	0.278	1	NSL1	0.671624
ATG3	0.213158	-0.0828331	0.261	0.321	1	ATG3	0.671298
DDX54	0.213361	0.100918	0.239	0.193	1	DDX54	0.670885
SNUPN	0.213788	-0.0856006	0.072	0.112	1	SNUPN	0.670017
UBE2G1	0.213814	0.0960871	0.239	0.176	1	UBE2G1	0.669963
PSMD9	0.213836	0.0884235	0.138	0.096	1	PSMD9	0.66992
SBNO2	0.213894	-0.0433038	0.225	0.299	1	SBNO2	0.669801
MPV17	0.214086	-0.0973918	0.116	0.16	1	MPV17	0.669412
ASCC3	0.214258	-0.102859	0.254	0.316	1	ASCC3	0.669063
MRPL28	0.214763	-0.117305	0.384	0.444	1	MRPL28	0.668041
SPCS3	0.214778	-0.113593	0.529	0.572	1	SPCS3	0.66801
CACUL1	0.214813	-0.096122	0.116	0.16	1	CACUL1	0.667939
CELF1	0.2149	-0.0692522	0.232	0.299	1	CELF1	0.667763
MCM3AP	0.214978	0.0467448	0.13	0.086	1	MCM3AP	0.667607
FGD5-AS1	0.21521	0.114347	0.239	0.193	1	FGD5-AS1	0.667137
DDX42	0.215267	0.113375	0.29	0.235	1	DDX42	0.667022
ZNF675	0.215272	0.0654524	0.167	0.118	1	ZNF675	0.667013
GADD45GIP1	0.215327	0.0867026	0.703	0.62	1	GADD45GIP1	0.666901
PAFAH1B3	0.215346	0.0738856	0.196	0.144	1	PAFAH1B3	0.666862
SF3B4	0.215451	0.0906506	0.217	0.166	1	SF3B4	0.666652
MBTPS1	0.215536	0.104242	0.268	0.214	1	MBTPS1	0.66648
RNASEH1	0.215617	0.074637	0.159	0.112	1	RNASEH1	0.666317
NT5C3B	0.215655	0.0748936	0.152	0.107	1	NT5C3B	0.666241
PATL2	0.215865	0.108978	0.225	0.171	1	PATL2	0.665819
PTPN22	0.215997	-0.101325	0.384	0.444	1	PTPN22	0.665553
THOC2	0.216329	-0.118239	0.348	0.406	1	THOC2	0.664885
HNRNPU	0.216368	0.0369686	0.833	0.807	1	HNRNPU	0.664807
PDLIM2	0.216458	-0.117228	0.413	0.476	1	PDLIM2	0.664627
SMC6	0.216911	-0.0835411	0.246	0.305	1	SMC6	0.663719
NUP214	0.217134	0.0761984	0.188	0.139	1	NUP214	0.663272
RPL21	0.217302	-0.047691	1	1	1	RPL21	0.662937
POLR2L	0.217318	0.0891412	0.558	0.487	1	POLR2L	0.662904
SF1	0.217436	-0.0746437	0.674	0.711	1	SF1	0.662668
HRAS	0.217825	-0.110046	0.152	0.203	1	HRAS	0.661892
TRMO	0.218028	-0.0971675	0.123	0.166	1	TRMO	0.661488
PCMTD1	0.218124	-0.122124	0.406	0.444	1	PCMTD1	0.661296
RANBP3	0.218285	-0.0592259	0.116	0.166	1	RANBP3	0.660977
METTL15	0.218381	0.0490899	0.116	0.075	1	METTL15	0.660785
KCNAB2	0.218603	-0.0473329	0.254	0.332	1	KCNAB2	0.660344
CYTH4	0.218809	-0.136364	0.246	0.299	1	CYTH4	0.659936
GSPT1	0.219474	0.0730435	0.616	0.545	1	GSPT1	0.658617
TXNRD1	0.220138	-0.128722	0.246	0.294	1	TXNRD1	0.657304
BIN2	0.220165	0.0764636	0.754	0.684	1	BIN2	0.657251
UBP1	0.220166	0.0606403	0.116	0.075	1	UBP1	0.65725
IL2RB	0.220202	0.0712326	0.529	0.465	1	IL2RB	0.657179
ZDHHC13	0.220259	-0.0718472	0.065	0.102	1	ZDHHC13	0.657067
STMN3	0.220483	0.0453537	0.174	0.123	1	STMN3	0.656625
MDM4	0.220624	-0.0420737	0.355	0.439	1	MDM4	0.656347
RUVBL1	0.220638	-0.0861218	0.254	0.321	1	RUVBL1	0.656319
AFTPH	0.220692	0.0721793	0.217	0.166	1	AFTPH	0.656213
CRIPT	0.221046	0.0580558	0.225	0.171	1	CRIPT	0.655518
NLRP1	0.221299	-0.09957	0.268	0.326	1	NLRP1	0.655021
PGP	0.221408	0.0486761	0.42	0.348	1	PGP	0.654806
TRIM27	0.221457	-0.0605158	0.181	0.235	1	TRIM27	0.65471
BATF	0.221559	0.0991809	0.609	0.61	1	BATF	0.654511
GALT	0.221614	-0.0622734	0.152	0.209	1	GALT	0.654403
WDR11	0.221646	0.116376	0.225	0.176	1	WDR11	0.654341
TMEM141	0.221713	0.104787	0.217	0.171	1	TMEM141	0.654208
CCDC93	0.221923	0.0770528	0.138	0.096	1	CCDC93	0.653798
ANXA4	0.222027	-0.0682873	0.159	0.219	1	ANXA4	0.653594
VPS51	0.222104	-0.117733	0.493	0.556	1	VPS51	0.653443
U2SURP	0.222227	-0.111086	0.449	0.519	1	U2SURP	0.653203
HIPK2	0.222517	0.0453877	0.101	0.064	1	HIPK2	0.652637
CARF	0.223042	0.0424953	0.109	0.07	1	CARF	0.651613
SEMA3G	0.223437	-0.0716581	0.072	0.112	1	SEMA3G	0.650844
SMIM10L1	0.223439	-0.0308744	0.239	0.31	1	SMIM10L1	0.650842
SOCS2	0.223462	-0.0480244	0.319	0.401	1	SOCS2	0.650797
C22orf46	0.223481	0.0491672	0.101	0.064	1	C22orf46	0.65076
THAP5	0.223603	0.0980688	0.225	0.176	1	THAP5	0.650523
PHLDB3	0.223855	0.0382405	0.123	0.08	1	PHLDB3	0.650033
NSUN5	0.223986	-0.0360059	0.181	0.251	1	NSUN5	0.649778
COP1	0.224492	-0.0723688	0.094	0.139	1	COP1	0.648799
MAPKAP1	0.224735	-0.0677253	0.109	0.155	1	MAPKAP1	0.648329
ARHGAP18	0.224736	-0.0581798	0.101	0.15	1	ARHGAP18	0.648327
REX1BD	0.224783	-0.0748002	0.63	0.684	1	REX1BD	0.648236
FBXO33	0.225187	-0.103094	0.116	0.16	1	FBXO33	0.647457
TOB1	0.225196	-0.0983647	0.225	0.283	1	TOB1	0.64744
CLN8	0.225404	-0.0893863	0.101	0.144	1	CLN8	0.647039
NFU1	0.22546	0.043768	0.188	0.134	1	NFU1	0.646931
SLC3A2	0.22549	0.0940971	0.522	0.46	1	SLC3A2	0.646874
TMEM165	0.22563	-0.0435814	0.348	0.422	1	TMEM165	0.646604
SFT2D1	0.225777	-0.0932545	0.493	0.54	1	SFT2D1	0.646321
IKBIP	0.225907	0.0719099	0.246	0.187	1	IKBIP	0.646071
NABP2	0.225986	-0.0278621	0.08	0.123	1	NABP2	0.645919
P2RX4	0.226048	0.100942	0.138	0.096	1	P2RX4	0.6458
MFSD11	0.226232	0.110573	0.225	0.176	1	MFSD11	0.645447
CAND1	0.226295	0.0701029	0.377	0.305	1	CAND1	0.645325
UBXN6	0.226423	-0.0701425	0.116	0.166	1	UBXN6	0.645079
PRPF3	0.226505	0.0411259	0.123	0.08	1	PRPF3	0.644922
SIRPG	0.226594	0.0713983	0.152	0.107	1	SIRPG	0.644751
SPOCK2	0.226759	-0.11601	0.891	0.898	1	SPOCK2	0.644435
SBDS	0.22679	0.138603	0.391	0.321	1	SBDS	0.644375
ALKBH3	0.226793	-0.081268	0.065	0.102	1	ALKBH3	0.644371
HDAC3	0.22686	0.0490425	0.29	0.219	1	HDAC3	0.644242
RABGAP1L	0.22687	0.150758	0.543	0.513	1	RABGAP1L	0.644222
CTLA4	0.226966	0.168168	0.384	0.316	1	CTLA4	0.64404
PRF1	0.227127	0.108588	0.283	0.23	1	PRF1	0.64373
GPR155	0.227131	0.134109	0.37	0.305	1	GPR155	0.643723
TMEM131	0.227182	0.0966618	0.123	0.086	1	TMEM131	0.643627
AMN1	0.227367	0.0485409	0.101	0.064	1	AMN1	0.643273
TRNT1	0.227372	-0.0898034	0.159	0.209	1	TRNT1	0.643263
MYL12A	0.227485	-0.0470473	0.993	0.989	1	MYL12A	0.643047
POLD2	0.227737	0.0568973	0.109	0.07	1	POLD2	0.642566
BBX	0.227869	0.142058	0.391	0.342	1	BBX	0.642316
SDF2	0.228293	-0.0896676	0.319	0.39	1	SDF2	0.641507
2020-09-06	0.228344	-0.0426438	0.906	0.957	1	2020-09-06	0.641411
TIMM23B	0.228346	0.0524987	0.101	0.064	1	TIMM23B	0.641407
SSBP2	0.228346	0.0468315	0.101	0.064	1	SSBP2	0.641407
CBR4	0.228389	-0.0767976	0.087	0.128	1	CBR4	0.641325
RYBP	0.228574	0.0930753	0.268	0.214	1	RYBP	0.640972
TMEM204	0.22876	-0.109462	0.181	0.23	1	TMEM204	0.64062
EXOSC9	0.228806	0.0704385	0.246	0.193	1	EXOSC9	0.640532
KHNYN	0.22883	-0.0581758	0.072	0.112	1	KHNYN	0.640487
SSR2	0.229168	-0.0716549	0.79	0.813	1	SSR2	0.639846
ILK	0.229308	0.0583104	0.37	0.31	1	ILK	0.63958
MCUR1	0.229466	-0.0505666	0.101	0.15	1	MCUR1	0.639282
PRR13	0.229587	-0.0127096	0.623	0.668	1	PRR13	0.639052
TOR1A	0.229654	-0.0873306	0.167	0.214	1	TOR1A	0.638926
PEX13	0.229791	0.0670769	0.152	0.107	1	PEX13	0.638666
ANXA6	0.230391	-0.12811	0.435	0.481	1	ANXA6	0.637535
DPM1	0.230438	0.076294	0.203	0.155	1	DPM1	0.637446
EIF2B5	0.230504	-0.0895826	0.123	0.171	1	EIF2B5	0.637322
TRIM28	0.230628	-0.0243299	0.181	0.251	1	TRIM28	0.637087
G3BP2	0.230778	-0.11967	0.587	0.615	1	G3BP2	0.636805
SRSF6	0.231139	-0.06965	0.145	0.198	1	SRSF6	0.636126
MRPS11	0.231466	0.101532	0.319	0.273	1	MRPS11	0.635512
NDUFS7	0.231562	0.072262	0.565	0.503	1	NDUFS7	0.635332
TXNDC9	0.231823	-0.10026	0.326	0.374	1	TXNDC9	0.634843
LINC02001	0.232486	0.0731284	0.123	0.086	1	LINC02001	0.633603
CASD1	0.232617	0.0617789	0.159	0.112	1	CASD1	0.633359
NME3	0.232647	-0.0195593	0.486	0.583	1	NME3	0.633303
COMMD9	0.232837	-0.0320589	0.116	0.171	1	COMMD9	0.632949
RIDA	0.232952	-0.0898431	0.072	0.107	1	RIDA	0.632734
MZT2A	0.23301	-0.0789528	0.609	0.695	1	MZT2A	0.632626
PSME1	0.233175	0.103484	0.877	0.856	1	PSME1	0.632317
TMEM8A	0.233335	0.0883425	0.246	0.193	1	TMEM8A	0.632021
HIRIP3	0.233412	0.0488338	0.159	0.112	1	HIRIP3	0.631878
SERTAD3	0.233426	-0.069054	0.101	0.144	1	SERTAD3	0.63185
DNAJC24	0.233509	-0.0755292	0.087	0.128	1	DNAJC24	0.631696
MCM3	0.234141	0.0393953	0.225	0.166	1	MCM3	0.630522
LEMD2	0.234315	0.0821084	0.116	0.08	1	LEMD2	0.6302
PIKFYVE	0.234461	0.0713599	0.138	0.096	1	PIKFYVE	0.629929
NFKB2	0.234819	0.0925553	0.319	0.257	1	NFKB2	0.629267
ARMCX6	0.234949	0.0257734	0.152	0.102	1	ARMCX6	0.629027
CHMP6	0.235066	-0.0677425	0.138	0.187	1	CHMP6	0.628811
PPIF	0.235072	0.0842423	0.152	0.112	1	PPIF	0.628798
RNF166	0.235086	0.0696119	0.435	0.364	1	RNF166	0.628773
DCAF8	0.235135	0.0886691	0.167	0.123	1	DCAF8	0.628682
THUMPD3-AS1	0.235153	-0.0681878	0.442	0.508	1	THUMPD3-AS1	0.62865
DPP3	0.235314	0.0614028	0.138	0.096	1	DPP3	0.628352
AGO1	0.23561	0.0357859	0.13	0.086	1	AGO1	0.627807
SSR1	0.235718	-0.0746092	0.326	0.39	1	SSR1	0.627608
CAPN1	0.235732	0.0979771	0.297	0.241	1	CAPN1	0.627581
RANGRF	0.235882	-0.0698417	0.123	0.166	1	RANGRF	0.627305
SP110	0.236138	-0.0700458	0.587	0.642	1	SP110	0.626833
RPUSD3	0.236291	0.163243	0.275	0.235	1	RPUSD3	0.626553
MTM1	0.236365	0.0326549	0.109	0.07	1	MTM1	0.626416
DTWD1	0.236691	-0.0834073	0.101	0.144	1	DTWD1	0.625817
CCDC6	0.236838	-0.0462942	0.094	0.139	1	CCDC6	0.625549
MOGS	0.236973	-0.0859121	0.08	0.118	1	MOGS	0.625301
SF3A1	0.237196	-0.108611	0.246	0.31	1	SF3A1	0.624893
BISPR	0.237235	0.0742695	0.13	0.091	1	BISPR	0.624822
TMEM159	0.237338	-0.0621506	0.065	0.102	1	TMEM159	0.624632
IFI27L2	0.237584	-0.0510681	0.406	0.492	1	IFI27L2	0.624182
PDCL3	0.237768	-0.0428238	0.283	0.353	1	PDCL3	0.623846
TWF2	0.237814	-0.0554203	0.536	0.615	1	TWF2	0.623763
CPSF3	0.238049	-0.0561274	0.123	0.171	1	CPSF3	0.623333
GTPBP1	0.238314	0.0410626	0.109	0.07	1	GTPBP1	0.622851
DDX60	0.238571	0.102203	0.232	0.182	1	DDX60	0.622382
NOP53	0.238654	-0.0626191	0.899	0.963	1	NOP53	0.622231
SPCS1	0.238679	0.0997171	0.819	0.733	1	SPCS1	0.622185
GPN1	0.238717	0.0695407	0.196	0.144	1	GPN1	0.622117
CDC37	0.238778	-0.0586702	0.514	0.588	1	CDC37	0.622006
TMEM243	0.238896	-0.0511896	0.486	0.545	1	TMEM243	0.621791
UBASH3B	0.238956	0.0985595	0.116	0.08	1	UBASH3B	0.621682
NOB1	0.238974	-0.0707748	0.217	0.283	1	NOB1	0.62165
CLPX	0.23902	-0.0892396	0.167	0.219	1	CLPX	0.621566
KDM7A	0.239043	-0.0717948	0.116	0.16	1	KDM7A	0.621524
CD70	0.239056	-0.166849	0.159	0.209	1	CD70	0.6215
PLEKHF1	0.239085	0.134395	0.362	0.316	1	PLEKHF1	0.621447
DNAJC4	0.239527	-0.0534252	0.13	0.182	1	DNAJC4	0.620646
HIVEP2	0.23983	0.0886324	0.167	0.123	1	HIVEP2	0.620096
FOPNL	0.23983	0.0687703	0.167	0.123	1	FOPNL	0.620096
NCF1	0.239865	-0.115741	0.304	0.364	1	NCF1	0.620034
RASSF2	0.239892	0.0773847	0.116	0.08	1	RASSF2	0.619984
LINC00623	0.240014	0.0608961	0.225	0.166	1	LINC00623	0.619764
PUF60	0.240057	-0.0637214	0.348	0.439	1	PUF60	0.619686
EXOSC8	0.240071	0.0998522	0.319	0.267	1	EXOSC8	0.619661
ALG6	0.240329	0.0375959	0.101	0.064	1	ALG6	0.619194
PFKL	0.240462	0.0975602	0.326	0.273	1	PFKL	0.618953
KIDINS220	0.240975	-0.0737328	0.181	0.235	1	KIDINS220	0.618028
TCF12	0.24098	-0.0585845	0.08	0.123	1	TCF12	0.61802
PSMA3	0.241016	0.114734	0.638	0.567	1	PSMA3	0.617954
SSH1	0.241018	0.0293376	0.123	0.08	1	SSH1	0.617951
FKBP5	0.24141	0.148478	0.167	0.123	1	FKBP5	0.617245
HECA	0.241415	0.0794409	0.268	0.203	1	HECA	0.617236
C4orf48	0.241519	-0.169294	0.536	0.599	1	C4orf48	0.617049
SERINC1	0.241628	-0.120897	0.225	0.283	1	SERINC1	0.616852
PRDX4	0.24174	0.0737595	0.261	0.209	1	PRDX4	0.616652
GOLGA7	0.241949	-0.0745885	0.261	0.332	1	GOLGA7	0.616275
PPP1R11	0.24213	0.0979294	0.261	0.214	1	PPP1R11	0.615951
SMAP1	0.242229	0.063054	0.42	0.337	1	SMAP1	0.615774
ZNF26	0.242483	-0.0821235	0.101	0.144	1	ZNF26	0.615319
DBNL	0.242585	-0.046966	0.413	0.513	1	DBNL	0.615136
PPP2CA	0.242658	-0.0447408	0.268	0.332	1	PPP2CA	0.615005
GATA3	0.242752	0.102418	0.42	0.364	1	GATA3	0.614837
CKAP2	0.242837	0.0910044	0.174	0.128	1	CKAP2	0.614685
SMC2	0.2429	-0.0662228	0.101	0.144	1	SMC2	0.614572
STRADA	0.2429	0.0598617	0.152	0.107	1	STRADA	0.614572
DNPH1	0.243199	0.115648	0.58	0.572	1	DNPH1	0.614039
RNF219	0.243267	-0.0879843	0.13	0.176	1	RNF219	0.613916
DCPS	0.24337	-0.0440117	0.174	0.235	1	DCPS	0.613733
UBE2M	0.243703	-0.0875386	0.435	0.535	1	UBE2M	0.613139
MAP2K3	0.244114	-0.0148719	0.275	0.358	1	MAP2K3	0.612407
RPL4	0.244234	-0.0553706	0.971	0.989	1	RPL4	0.612193
CASP6	0.244311	-0.0512102	0.167	0.225	1	CASP6	0.612058
ERP44	0.244612	-0.0700347	0.297	0.374	1	ERP44	0.611522
UTP18	0.24473	-0.0816373	0.181	0.23	1	UTP18	0.611313
DPF2	0.244733	0.0827615	0.261	0.214	1	DPF2	0.611308
AGO2	0.244778	-0.0897202	0.254	0.299	1	AGO2	0.611227
TUT4	0.244802	-0.102403	0.435	0.487	1	TUT4	0.611185
CDKN1B	0.244893	-0.115799	0.522	0.54	1	CDKN1B	0.611025
RIOK1	0.245138	-0.0689165	0.152	0.209	1	RIOK1	0.610589
TTC31	0.245288	-0.0788719	0.072	0.107	1	TTC31	0.610323
CAST	0.245332	-0.0740838	0.754	0.775	1	CAST	0.610247
NFKBIB	0.245391	-0.0633742	0.138	0.187	1	NFKBIB	0.610142
DAP3	0.245573	-0.0594468	0.348	0.406	1	DAP3	0.60982
RPL9	0.245933	-0.0388067	1	1	1	RPL9	0.609183
USF3	0.246127	-0.0611928	0.109	0.155	1	USF3	0.608841
CALU	0.246193	0.0869383	0.167	0.123	1	CALU	0.608725
RAB30	0.246258	0.0478064	0.152	0.107	1	RAB30	0.60861
THAP3	0.246575	0.077882	0.152	0.112	1	THAP3	0.60805
SUPT6H	0.246648	0.0905153	0.268	0.225	1	SUPT6H	0.607922
SMU1	0.24722	-0.0623231	0.21	0.273	1	SMU1	0.606916
WDR37	0.247493	0.0398333	0.138	0.096	1	WDR37	0.606438
TXNDC17	0.247521	0.100443	0.449	0.401	1	TXNDC17	0.606388
EDEM2	0.247552	0.0797696	0.145	0.107	1	EDEM2	0.606333
SAT2	0.247625	0.102334	0.355	0.299	1	SAT2	0.606206
SRI	0.247728	-0.0721268	0.558	0.647	1	SRI	0.606026
EIF3J-DT	0.247973	-0.11466	0.145	0.193	1	EIF3J-DT	0.605596
C9orf78	0.248249	0.0469247	0.594	0.497	1	C9orf78	0.605112
FAM117A	0.248269	0.10373	0.283	0.23	1	FAM117A	0.605078
DCK	0.248533	-0.101238	0.449	0.519	1	DCK	0.604616
TMEM87B	0.248636	0.0385082	0.167	0.118	1	TMEM87B	0.604436
AKIRIN1	0.248656	-0.0608871	0.312	0.374	1	AKIRIN1	0.604401
RRP36	0.248891	-0.019734	0.312	0.385	1	RRP36	0.603991
CEP290	0.24903	0.110777	0.181	0.139	1	CEP290	0.603749
AES	0.249106	-0.0717291	0.978	0.984	1	AES	0.603616
TMEM120B	0.249195	0.10729	0.217	0.171	1	TMEM120B	0.603461
MINPP1	0.249232	-0.0602424	0.065	0.102	1	MINPP1	0.603396
GOSR1	0.249664	-0.0734741	0.203	0.262	1	GOSR1	0.602645
BIN1	0.249676	-0.099756	0.442	0.471	1	BIN1	0.602623
BPTF	0.249815	-0.0668187	0.514	0.599	1	BPTF	0.602382
BUD23	0.249989	-0.043591	0.283	0.337	1	BUD23	0.60208
KMT2A	0.250065	0.1154	0.652	0.615	1	KMT2A	0.601948
DNTTIP1	0.25026	-0.0547673	0.087	0.128	1	DNTTIP1	0.601609
ATP2A2	0.250296	0.104062	0.203	0.16	1	ATP2A2	0.601546
HS3ST3B1	0.250423	-0.0429613	0.159	0.219	1	HS3ST3B1	0.601326
HSDL2	0.251137	-0.0833702	0.167	0.214	1	HSDL2	0.60009
ZEB1	0.251208	-0.0894392	0.21	0.267	1	ZEB1	0.599966
ARID4A	0.251214	0.101444	0.42	0.342	1	ARID4A	0.599956
ZFAND1	0.251276	-0.0641227	0.203	0.267	1	ZFAND1	0.599849
RNF207	0.251355	-0.0830427	0.101	0.144	1	RNF207	0.599712
GTF2H2	0.251624	0.0597248	0.13	0.091	1	GTF2H2	0.599248
BCOR	0.251722	0.0886231	0.138	0.102	1	BCOR	0.59908
CHD8	0.251814	0.116637	0.312	0.262	1	CHD8	0.598921
TSEN54	0.251856	0.0705331	0.167	0.123	1	TSEN54	0.598848
APOL6	0.252146	-0.0845726	0.326	0.38	1	APOL6	0.598348
MBD3	0.25227	-0.0464948	0.065	0.102	1	MBD3	0.598135
ZNF383	0.252296	-0.0435059	0.072	0.112	1	ZNF383	0.59809
ENTPD4	0.252367	-0.0844129	0.174	0.219	1	ENTPD4	0.597967
MFGE8	0.252731	0.0753388	0.159	0.118	1	MFGE8	0.597342
FUT7	0.252731	0.0650829	0.159	0.118	1	FUT7	0.597342
EVL	0.252804	-0.0716227	0.884	0.909	1	EVL	0.597216
TFDP1	0.252941	-0.0506643	0.116	0.166	1	TFDP1	0.596982
DGCR6L	0.25313	0.1426	0.29	0.241	1	DGCR6L	0.596657
TMEM167B	0.253319	-0.0892322	0.13	0.171	1	TMEM167B	0.596332
TENT4B	0.253319	0.0578765	0.181	0.134	1	TENT4B	0.596332
BRD1	0.253738	-0.0797222	0.167	0.219	1	BRD1	0.595615
ACAP2	0.253842	0.101079	0.435	0.385	1	ACAP2	0.595437
CD47	0.254235	0.0731534	0.768	0.754	1	CD47	0.594765
HTATSF1	0.254246	-0.0504693	0.355	0.406	1	HTATSF1	0.594746
PBX4	0.254311	-0.0715621	0.116	0.16	1	PBX4	0.594636
RAE1	0.254363	-0.0588385	0.101	0.144	1	RAE1	0.594546
SCLT1	0.254388	0.057994	0.13	0.091	1	SCLT1	0.594503
PAPOLA	0.254527	0.0617741	0.638	0.572	1	PAPOLA	0.594266
GSTO1	0.254573	0.10918	0.638	0.62	1	GSTO1	0.594187
TIAL1	0.254577	0.0513719	0.449	0.396	1	TIAL1	0.594181
RMND5B	0.254746	-0.0416596	0.123	0.166	1	RMND5B	0.593892
NUP98	0.254796	-0.0702192	0.159	0.209	1	NUP98	0.593807
TBC1D15	0.254818	0.100031	0.384	0.342	1	TBC1D15	0.593769
NAGK	0.254829	0.100003	0.312	0.267	1	NAGK	0.593751
FKBP3	0.254844	0.0551363	0.377	0.299	1	FKBP3	0.593726
RNF213	0.25488	0.0547507	0.906	0.861	1	RNF213	0.593664
SRP72	0.255108	-0.0483918	0.312	0.396	1	SRP72	0.593275
RFK	0.255145	-0.10765	0.196	0.241	1	RFK	0.593213
CSF1	0.255176	-0.0732241	0.109	0.15	1	CSF1	0.59316
PCSK7	0.255217	0.0637975	0.761	0.652	1	PCSK7	0.593091
RPS27	0.255291	-0.0466194	1	1	1	RPS27	0.592965
FYCO1	0.255532	-0.0648159	0.08	0.118	1	FYCO1	0.592554
PAIP1	0.255851	-0.0832787	0.225	0.278	1	PAIP1	0.592013
FAM219B	0.255868	-0.085101	0.152	0.198	1	FAM219B	0.591984
UBL4A	0.255889	-0.0563175	0.145	0.198	1	UBL4A	0.591948
MAGT1	0.255927	0.0655122	0.232	0.176	1	MAGT1	0.591884
STX4	0.256029	-0.0796292	0.225	0.289	1	STX4	0.591711
HNRNPA2B1	0.256285	0.0701595	0.964	0.979	1	HNRNPA2B1	0.591277
RPS6	0.25629	-0.033047	1	1	1	RPS6	0.591268
MAP7D1	0.256521	0.0921847	0.333	0.283	1	MAP7D1	0.590876
KLF10	0.256637	-0.0697421	0.087	0.128	1	KLF10	0.59068
MRPS33	0.257529	0.0514283	0.37	0.305	1	MRPS33	0.589173
SGTB	0.257563	0.0676658	0.239	0.187	1	SGTB	0.589116
PRKACB	0.257651	0.0846706	0.312	0.267	1	PRKACB	0.588968
MRPL13	0.257703	-0.0936301	0.297	0.348	1	MRPL13	0.588881
RBM18	0.257973	-0.0624772	0.094	0.134	1	RBM18	0.588426
IQGAP2	0.258027	-0.0653552	0.638	0.69	1	IQGAP2	0.588336
USF2	0.2581	0.143214	0.529	0.513	1	USF2	0.588212
CBX4	0.258447	0.0901349	0.181	0.139	1	CBX4	0.587629
RAB29	0.258496	-0.0946448	0.413	0.471	1	RAB29	0.587546
JTB	0.258514	0.0565399	0.775	0.759	1	JTB	0.587515
FCMR	0.258533	-0.0838819	0.543	0.615	1	FCMR	0.587484
APBA3	0.258875	-0.0670355	0.094	0.134	1	APBA3	0.58691
TERF2	0.259139	0.0491169	0.152	0.107	1	TERF2	0.586467
SMUG1	0.259157	0.0609373	0.116	0.08	1	SMUG1	0.586438
ITGAL	0.259168	0.0498247	0.558	0.492	1	ITGAL	0.586419
CUTA	0.259577	-0.0703651	0.594	0.663	1	CUTA	0.585734
TTPAL	0.259622	0.0631526	0.174	0.128	1	TTPAL	0.585659
AEBP2	0.260011	0.0831324	0.196	0.15	1	AEBP2	0.585009
RNF38	0.260106	0.0443423	0.138	0.096	1	RNF38	0.58485
RMC1	0.260147	0.0492455	0.116	0.08	1	RMC1	0.584781
MTMR4	0.260306	0.072938	0.159	0.118	1	MTMR4	0.584515
DHX16	0.260702	0.0405306	0.145	0.102	1	DHX16	0.583856
KDM5A	0.260959	0.0906777	0.435	0.358	1	KDM5A	0.583427
TPD52	0.261292	-0.0716649	0.08	0.118	1	TPD52	0.582874
MAPK14	0.261468	0.062427	0.196	0.144	1	MAPK14	0.582581
TMC6	0.26177	-0.0346763	0.471	0.545	1	TMC6	0.58208
SETD3	0.261863	0.0513008	0.13	0.091	1	SETD3	0.581926
NSMCE2	0.261937	0.0708404	0.152	0.112	1	NSMCE2	0.581804
GNAI2	0.262026	0.0325981	0.819	0.775	1	GNAI2	0.581655
HMG20B	0.262118	-0.0342116	0.123	0.176	1	HMG20B	0.581503
DERL2	0.262141	-0.0412358	0.268	0.348	1	DERL2	0.581465
ATXN3	0.262181	-0.0836987	0.181	0.23	1	ATXN3	0.581398
ATXN2L	0.262549	0.0656563	0.246	0.193	1	ATXN2L	0.580789
REPIN1	0.26258	-0.0482249	0.065	0.102	1	REPIN1	0.580738
VEGFB	0.263036	-0.0575942	0.138	0.187	1	VEGFB	0.579984
SOD2	0.263044	0.0220701	0.275	0.348	1	SOD2	0.579972
BTBD7	0.263159	0.0510937	0.225	0.176	1	BTBD7	0.579781
LRRC32	0.263231	-0.0799265	0.08	0.118	1	LRRC32	0.579662
PSMA5	0.263267	0.0839446	0.761	0.684	1	PSMA5	0.579603
RPP38	0.263508	-0.0916005	0.145	0.187	1	RPP38	0.579206
VDAC1	0.263526	-0.0544496	0.42	0.492	1	VDAC1	0.579177
ATXN7L1	0.263734	0.0538506	0.174	0.128	1	ATXN7L1	0.578834
PXN	0.263823	0.0456269	0.196	0.144	1	PXN	0.578687
RNH1	0.264086	0.105308	0.514	0.439	1	RNH1	0.578255
APOBEC3G	0.264122	-0.0224602	0.572	0.631	1	APOBEC3G	0.578196
LDB1	0.264205	0.0540007	0.123	0.086	1	LDB1	0.578059
NELFE	0.264332	0.0626233	0.239	0.187	1	NELFE	0.577851
C6orf48	0.264409	-0.103901	0.442	0.503	1	C6orf48	0.577724
MSL1	0.264465	-0.0406598	0.116	0.166	1	MSL1	0.577632
CDKN2D	0.264531	-0.102068	0.326	0.406	1	CDKN2D	0.577524
ADPRHL2	0.264554	-0.0988914	0.13	0.171	1	ADPRHL2	0.577486
GCNT4	0.26456	0.107475	0.152	0.112	1	GCNT4	0.577476
DENND6A	0.264883	0.08683	0.188	0.144	1	DENND6A	0.576947
DCTD	0.265002	-0.044575	0.087	0.128	1	DCTD	0.576751
PGAM5	0.26515	-0.0695468	0.072	0.107	1	PGAM5	0.576508
ZBTB7A	0.265192	-0.0913354	0.37	0.433	1	ZBTB7A	0.57644
TSC1	0.265248	-0.0597066	0.094	0.134	1	TSC1	0.576347
UBE2Q2	0.265346	0.0278001	0.232	0.176	1	UBE2Q2	0.576188
CHD9	0.265377	-0.0840861	0.21	0.262	1	CHD9	0.576136
TET2	0.265443	0.082963	0.159	0.118	1	TET2	0.576028
XRCC1	0.265519	0.0734979	0.109	0.075	1	XRCC1	0.575904
LRCH1	0.266159	-0.0615711	0.08	0.118	1	LRCH1	0.574858
PMPCA	0.266237	0.10881	0.174	0.134	1	PMPCA	0.574732
PRKAA1	0.266289	0.0569742	0.254	0.198	1	PRKAA1	0.574648
ATP8B2	0.266399	-0.0965664	0.283	0.348	1	ATP8B2	0.574467
GLMN	0.26656	0.0907001	0.167	0.128	1	GLMN	0.574205
FAM78A	0.266996	-0.0782233	0.188	0.246	1	FAM78A	0.573495
CIRBP	0.267088	0.0950218	0.826	0.781	1	CIRBP	0.573345
EMSY	0.267089	0.0452216	0.13	0.091	1	EMSY	0.573344
OXLD1	0.267092	0.0383226	0.275	0.214	1	OXLD1	0.57334
ARHGAP9	0.267119	-0.10828	0.326	0.374	1	ARHGAP9	0.573295
MBNL2	0.267155	-0.0272845	0.072	0.112	1	MBNL2	0.573237
WWP2	0.267177	-0.0286021	0.08	0.123	1	WWP2	0.573201
IDH3A	0.267568	-0.0769835	0.087	0.123	1	IDH3A	0.572566
PIK3R1	0.267794	0.11378	0.594	0.551	1	PIK3R1	0.572199
FTL	0.267977	-0.0855755	1	1	1	FTL	0.571903
TRIM14	0.268024	0.107242	0.377	0.337	1	TRIM14	0.571826
GRAP2	0.268096	0.0918025	0.232	0.187	1	GRAP2	0.57171
APC	0.268108	0.0955721	0.181	0.139	1	APC	0.571691
RC3H1	0.268728	-0.0729856	0.123	0.166	1	RC3H1	0.570688
EAPP	0.269118	0.0751096	0.5	0.433	1	EAPP	0.570057
DKC1	0.269134	0.100131	0.188	0.139	1	DKC1	0.570031
UBE2I	0.269191	-0.0799589	0.623	0.674	1	UBE2I	0.56994
COPS8	0.269566	-0.0648797	0.123	0.166	1	COPS8	0.569335
RPL23	0.269787	0.0590322	0.986	0.995	1	RPL23	0.56898
ARPC1B	0.269842	-0.0848458	0.804	0.866	1	ARPC1B	0.56889
CLP1	0.269969	-0.0439848	0.065	0.102	1	CLP1	0.568686
UBE4B	0.270098	0.0601588	0.123	0.086	1	UBE4B	0.568478
ZNF445	0.270197	-0.027073	0.072	0.112	1	ZNF445	0.568319
METTL16	0.270203	0.0696393	0.196	0.15	1	METTL16	0.56831
PSMB8-AS1	0.27031	-0.0369497	0.391	0.455	1	PSMB8-AS1	0.568138
ERCC6L2	0.270915	0.117022	0.159	0.123	1	ERCC6L2	0.567167
XIST	0.271093	0.0710962	0.862	0.845	1	XIST	0.566882
LPXN	0.271519	-0.0551878	0.283	0.337	1	LPXN	0.5662
RPS6KB2	0.271531	-0.0520385	0.232	0.289	1	RPS6KB2	0.56618
ZBTB8OS	0.271564	-0.0759622	0.268	0.332	1	ZBTB8OS	0.566128
MZT1	0.271566	-0.0719781	0.239	0.305	1	MZT1	0.566124
RPL11	0.271605	-0.0301051	1	1	1	RPL11	0.566062
COX18	0.271705	0.115796	0.101	0.07	1	COX18	0.565902
EEF1E1	0.271839	0.0669514	0.268	0.209	1	EEF1E1	0.565688
CYB561A3	0.272205	0.0857627	0.181	0.139	1	CYB561A3	0.565103
MRPS2	0.272205	0.0776769	0.181	0.139	1	MRPS2	0.565103
STK24	0.27227	0.104661	0.406	0.348	1	STK24	0.565
GON7	0.272938	-0.055524	0.123	0.166	1	GON7	0.563936
DOK1	0.272938	-0.0816641	0.123	0.166	1	DOK1	0.563936
ZNFX1	0.272948	-0.0833308	0.145	0.193	1	ZNFX1	0.56392
COX19	0.273022	-0.0659889	0.188	0.241	1	COX19	0.563803
PDCD11	0.273079	-0.0526737	0.08	0.118	1	PDCD11	0.563712
RPS15	0.27317	-0.0351003	1	1	1	RPS15	0.563566
TBC1D23	0.273264	0.0511533	0.116	0.08	1	TBC1D23	0.563418
C16orf87	0.273383	-0.0995044	0.196	0.235	1	C16orf87	0.563228
TGIF2	0.273397	-0.0586509	0.072	0.107	1	TGIF2	0.563206
ST13	0.273938	0.107715	0.594	0.54	1	ST13	0.562348
IK	0.273975	0.0593056	0.717	0.631	1	IK	0.562289
MYD88	0.274327	-0.0324109	0.167	0.219	1	MYD88	0.561732
ANKRD11	0.274422	0.090166	0.783	0.727	1	ANKRD11	0.561582
AK3	0.274432	0.0591031	0.203	0.155	1	AK3	0.561565
WDR45	0.274531	-0.0993985	0.21	0.257	1	WDR45	0.561408
TPP1	0.274672	-0.102448	0.355	0.406	1	TPP1	0.561185
ZFP36L2	0.274911	-0.153645	0.819	0.802	1	ZFP36L2	0.560808
CCNG2	0.274938	0.0498041	0.203	0.15	1	CCNG2	0.560765
SAMD9L	0.275248	0.117097	0.464	0.406	1	SAMD9L	0.560277
NAGPA	0.275306	0.0472817	0.13	0.091	1	NAGPA	0.560184
CFP	0.275333	-0.0427523	0.065	0.102	1	CFP	0.560142
SLAMF1	0.275408	0.0671611	0.348	0.278	1	SLAMF1	0.560023
GPBP1	0.275482	0.0545715	0.638	0.61	1	GPBP1	0.559908
ZNF148	0.275597	0.0766363	0.362	0.299	1	ZNF148	0.559725
EIF4E2	0.275701	0.0728868	0.341	0.289	1	EIF4E2	0.559562
USP47	0.27574	0.0741216	0.341	0.278	1	USP47	0.559501
ZC3H18	0.275763	0.11195	0.355	0.321	1	ZC3H18	0.559463
DMAC2	0.276071	-0.0591763	0.109	0.15	1	DMAC2	0.55898
NDUFB5	0.276172	0.0830888	0.63	0.551	1	NDUFB5	0.558821
ERG28	0.276245	0.0794104	0.203	0.16	1	ERG28	0.558706
SMPD4	0.276415	-0.0270033	0.065	0.102	1	SMPD4	0.558439
HADH	0.276534	-0.0550037	0.072	0.107	1	HADH	0.558251
SLC12A7	0.276534	-0.0570284	0.072	0.107	1	SLC12A7	0.558251
TAF9	0.27668	0.0549661	0.304	0.251	1	TAF9	0.558023
DUSP10	0.277093	0.0590952	0.109	0.075	1	DUSP10	0.557374
MAX	0.277183	0.0854417	0.355	0.289	1	MAX	0.557233
TXK	0.277218	0.152073	0.297	0.262	1	TXK	0.557179
VPS25	0.277418	0.0546906	0.196	0.15	1	VPS25	0.556866
USP15	0.277477	-0.0743249	0.761	0.759	1	USP15	0.556773
MRPL33	0.277553	-0.0287331	0.435	0.487	1	MRPL33	0.556654
EED	0.277763	-0.0675291	0.188	0.246	1	EED	0.556326
RCN2	0.277866	0.0859414	0.457	0.406	1	RCN2	0.556164
TBRG4	0.27805	-0.0673507	0.123	0.166	1	TBRG4	0.555877
CRKL	0.278162	0.0579326	0.109	0.075	1	CRKL	0.555702
SEC24C	0.278162	0.0576555	0.109	0.075	1	SEC24C	0.555702
ATP5MC1	0.27831	0.0477641	0.442	0.396	1	ATP5MC1	0.555472
PRKAR2A	0.27842	-0.0654494	0.203	0.262	1	PRKAR2A	0.555299
GLG1	0.27861	0.0148144	0.522	0.439	1	GLG1	0.555004
RPL31	0.278914	-0.0741154	0.964	0.925	1	RPL31	0.554529
MBOAT7	0.279107	0.0543533	0.123	0.086	1	MBOAT7	0.55423
FAM168B	0.279107	-0.0557542	0.08	0.118	1	FAM168B	0.55423
UIMC1	0.279208	0.0332855	0.203	0.155	1	UIMC1	0.554073
[truncated: 3,772 more rows]

## Sheet: S2B-C4 PD-L1 vs. IgG
Table S2B: Differential Expression Analysis CD4 Tregs cluster 4 anti-PD-L1 vs. IgG
	p_val	avg_logFC	pct.1	pct.2	p_val_adj	Gene_ID	logP
GPR137	0.000139986	0.195986	0.13	0.021	1	GPR137	3.85392
SDR39U1	0.00031117	-0.202881	0.026	0.16	1	SDR39U1	3.507
APEX1	0.000435203	-0.267628	0.191	0.385	1	APEX1	3.36131
PHF23	0.00076754	-0.227523	0.087	0.246	1	PHF23	3.1149
RGS19	0.000855465	-0.228873	0.287	0.487	1	RGS19	3.0678
CCSER2	0.00103903	-0.23493	0.226	0.412	1	CCSER2	2.98337
CCT4	0.00143887	-0.202003	0.383	0.604	1	CCT4	2.84198
AURKAIP1	0.00148991	0.227067	0.739	0.668	1	AURKAIP1	2.82684
RNF219	0.00172023	-0.20921	0.052	0.176	1	RNF219	2.76441
CHST7	0.00200874	-0.171428	0.087	0.23	1	CHST7	2.69708
ZNF791	0.00211422	-0.282456	0.209	0.374	1	ZNF791	2.67485
RPL27	0.00213321	-0.136334	0.983	1	1	RPL27	2.67097
ABCF2.1	0.00229541	0.186553	0.183	0.07	1	ABCF2.1	2.63914
PELP1	0.00240607	0.170955	0.148	0.048	1	PELP1	2.61869
SHLD1	0.00243122	0.165057	0.183	0.07	1	SHLD1	2.61418
NEMF	0.00256297	-0.252587	0.33	0.497	1	NEMF	2.59126
LITAF	0.00282623	-0.237576	0.339	0.529	1	LITAF	2.54879
SOD1	0.00294616	0.180187	0.93	0.92	1	SOD1	2.53074
ANXA7	0.0030934	0.238129	0.626	0.481	1	ANXA7	2.50956
TP53I13	0.00314494	-0.175603	0.078	0.209	1	TP53I13	2.50239
GPBP1	0.00335024	0.199163	0.713	0.61	1	GPBP1	2.47492
STAG2	0.00337953	-0.211315	0.287	0.487	1	STAG2	2.47114
NUDT21	0.00356039	-0.177114	0.139	0.305	1	NUDT21	2.4485
UPP1	0.00359692	-0.253191	0.513	0.695	1	UPP1	2.44407
MT-CO3	0.00364324	-0.0891644	1	1	1	MT-CO3	2.43851
PPA1	0.00367536	-0.21283	0.365	0.556	1	PPA1	2.4347
YWHAG	0.00369675	0.213649	0.243	0.123	1	YWHAG	2.43218
NCK1	0.0038029	-0.209892	0.27	0.465	1	NCK1	2.41988
GPBP1L1	0.00381818	-0.165708	0.165	0.326	1	GPBP1L1	2.41814
TFAM	0.00386753	-0.23568	0.174	0.326	1	TFAM	2.41257
PSMB3	0.00389834	0.177851	0.843	0.775	1	PSMB3	2.40912
ISG15	0.00389874	0.220778	0.748	0.674	1	ISG15	2.40908
RELL2	0.00416533	-0.161207	0.043	0.15	1	RELL2	2.38035
PPP6C	0.00422056	-0.188544	0.113	0.251	1	PPP6C	2.37463
STX4	0.00440319	-0.190912	0.139	0.289	1	STX4	2.35623
AGAP2	0.00443383	0.180533	0.235	0.112	1	AGAP2	2.35322
PPP1R11	0.00446208	0.212154	0.339	0.214	1	PPP1R11	2.35046
TRIM59	0.00451507	0.237833	0.261	0.139	1	TRIM59	2.34534
RRP8	0.0045248	-0.149022	0.043	0.15	1	RRP8	2.3444
TTI1	0.00471855	-0.148068	0.026	0.118	1	TTI1	2.32619
NLRP1	0.00483774	-0.195446	0.165	0.326	1	NLRP1	2.31536
CCND2	0.00490279	-0.178981	0.539	0.69	1	CCND2	2.30956
WHAMM	0.0049768	-0.206048	0.078	0.193	1	WHAMM	2.30305
ASAH1	0.00513514	-0.195822	0.13	0.273	1	ASAH1	2.28945
BCL7C	0.00569135	0.177007	0.513	0.348	1	BCL7C	2.24478
TPMT	0.0058923	-0.15617	0.07	0.187	1	TPMT	2.22972
MRPL50	0.00595051	0.247487	0.374	0.246	1	MRPL50	2.22545
ANAPC4	0.00626769	-0.148648	0.052	0.16	1	ANAPC4	2.20289
WDR55	0.00626967	0.170991	0.165	0.07	1	WDR55	2.20276
PECR	0.00629068	0.208142	0.183	0.08	1	PECR	2.2013
SGTB	0.00634315	0.243526	0.313	0.187	1	SGTB	2.19769
UBAP2L	0.00644842	-0.161863	0.078	0.198	1	UBAP2L	2.19055
SEMA3G	0.00647383	-0.16703	0.026	0.112	1	SEMA3G	2.18884
OAS1	0.00677277	0.214822	0.374	0.241	1	OAS1	2.16923
SF3A3	0.00678858	-0.189622	0.183	0.332	1	SF3A3	2.16822
RPS5	0.00705056	-0.129527	1	1	1	RPS5	2.15178
SUGP2	0.00762122	-0.138886	0.104	0.225	1	SUGP2	2.11798
ZNF143	0.00805601	0.182035	0.261	0.144	1	ZNF143	2.09388
WIPF2	0.00811254	-0.195947	0.078	0.187	1	WIPF2	2.09084
PPP6R3	0.00868502	0.181278	0.304	0.182	1	PPP6R3	2.06123
C11orf68	0.00933426	-0.130648	0.026	0.107	1	C11orf68	2.02992
TXLNG	0.00950974	0.205734	0.209	0.107	1	TXLNG	2.02183
PRKCA	0.00959498	0.190251	0.183	0.086	1	PRKCA	2.01796
NINJ1	0.00971383	-0.177262	0.139	0.278	1	NINJ1	2.01261
RFC1	0.00976634	0.175873	0.548	0.401	1	RFC1	2.01027
CGRRF1	0.0101396	-0.160787	0.061	0.16	1	CGRRF1	1.99398
ZNF200	0.0101928	-0.127336	0.035	0.123	1	ZNF200	1.99171
COQ6	0.0102249	0.17455	0.104	0.032	1	COQ6	1.99034
AC025159.1	0.0103228	0.118708	0.104	0.032	1	AC025159.1	1.9862
ASXL2	0.0104062	-0.196095	0.165	0.299	1	ASXL2	1.98271
MBD6	0.0106736	0.10512	0.113	0.037	1	MBD6	1.97169
SPTSSA	0.0108243	-0.126521	0.052	0.15	1	SPTSSA	1.9656
HMCES	0.0109961	-0.177175	0.191	0.332	1	HMCES	1.95876
CYBC1	0.0111077	0.241626	0.478	0.364	1	CYBC1	1.95437
NXT2	0.0111616	-0.12519	0.026	0.107	1	NXT2	1.95227
SMARCAD1	0.0112354	0.177541	0.183	0.086	1	SMARCAD1	1.94941
ANKFY1	0.0113388	-0.136758	0.087	0.203	1	ANKFY1	1.94543
MRPL3	0.011434	-0.181663	0.2	0.342	1	MRPL3	1.9418
CLASP1	0.0115423	-0.147966	0.035	0.118	1	CLASP1	1.93771
CEP97	0.0115838	-0.15366	0.052	0.144	1	CEP97	1.93615
PPP3CB	0.011609	0.181954	0.261	0.15	1	PPP3CB	1.9352
KCNK6	0.0116718	-0.198059	0.104	0.219	1	KCNK6	1.93286
MVP	0.0118163	-0.123768	0.357	0.529	1	MVP	1.92752
INF2	0.0119362	-0.135026	0.07	0.176	1	INF2	1.92313
DDX60L	0.0119863	0.215695	0.27	0.155	1	DDX60L	1.92132
P2RX5	0.0120086	-0.137546	0.035	0.118	1	P2RX5	1.92051
CRK	0.0124485	0.188329	0.209	0.107	1	CRK	1.90488
PHKB	0.0124867	0.229551	0.426	0.294	1	PHKB	1.90355
KANSL1	0.013032	-0.165819	0.374	0.572	1	KANSL1	1.88499
PDCD5	0.0131852	0.139558	0.626	0.471	1	PDCD5	1.87991
XAF1	0.0136151	0.251631	0.461	0.342	1	XAF1	1.86598
MPC2	0.0136288	-0.125425	0.322	0.535	1	MPC2	1.86554
SLC25A1	0.0136336	-0.17507	0.087	0.187	1	SLC25A1	1.86539
WDR33	0.0137284	-0.157281	0.27	0.428	1	WDR33	1.86238
IER3IP1	0.0137334	-0.173243	0.2	0.353	1	IER3IP1	1.86222
SCAMP3	0.0139041	-0.148502	0.061	0.155	1	SCAMP3	1.85686
CNOT10	0.0139293	-0.131707	0.07	0.171	1	CNOT10	1.85607
EXOG	0.0142848	0.166561	0.287	0.166	1	EXOG	1.84512
SGMS1	0.0142864	-0.163887	0.078	0.182	1	SGMS1	1.84508
STAM2	0.0143593	0.132516	0.165	0.075	1	STAM2	1.84287
TRMU	0.0145954	0.144185	0.13	0.053	1	TRMU	1.83578
RILPL2	0.0147097	-0.137236	0.4	0.561	1	RILPL2	1.8324
SRM	0.0147638	-0.153983	0.252	0.396	1	SRM	1.8308
CLSTN3	0.0151357	-0.140213	0.043	0.128	1	CLSTN3	1.82
PRKAG1	0.0154036	0.185206	0.27	0.166	1	PRKAG1	1.81238
QDPR	0.0154716	-0.143741	0.061	0.155	1	QDPR	1.81047
TWF2	0.0155321	-0.188306	0.478	0.615	1	TWF2	1.80877
RAP1GDS1	0.0160438	-0.119978	0.226	0.369	1	RAP1GDS1	1.79469
EIF3D	0.0163673	-0.217518	0.591	0.727	1	EIF3D	1.78602
HEXA	0.0163853	-0.156832	0.2	0.326	1	HEXA	1.78555
DHFR	0.0164301	0.131547	0.139	0.059	1	DHFR	1.78436
TMEM33	0.0165371	-0.159107	0.139	0.257	1	TMEM33	1.78154
CTSB	0.0166134	0.171007	0.417	0.31	1	CTSB	1.77954
TOE1	0.0166663	-0.126672	0.035	0.112	1	TOE1	1.77816
NIT2	0.0167576	-0.147848	0.13	0.251	1	NIT2	1.77579
SLC25A33	0.0167958	-0.116702	0.035	0.112	1	SLC25A33	1.7748
TRMO	0.0168731	-0.132532	0.07	0.166	1	TRMO	1.7728
CD38	0.0169378	0.178185	0.243	0.139	1	CD38	1.77114
MT-ND4L	0.0169976	-0.205428	0.426	0.551	1	MT-ND4L	1.76961
SETDB2	0.0170531	0.174716	0.217	0.118	1	SETDB2	1.7682
CNPY4	0.0170555	0.123208	0.139	0.059	1	CNPY4	1.76813
TMC6	0.0170821	-0.103623	0.348	0.545	1	TMC6	1.76746
RNF11	0.0171264	-0.114278	0.043	0.128	1	RNF11	1.76634
TMEM263	0.0172096	-0.151856	0.087	0.193	1	TMEM263	1.76423
PDLIM2	0.0172196	-0.193111	0.339	0.476	1	PDLIM2	1.76398
FANCA	0.0173226	-0.121683	0.035	0.112	1	FANCA	1.76139
DAD1	0.017989	0.172583	0.783	0.684	1	DAD1	1.74499
FAM129A	0.0180911	-0.190286	0.47	0.61	1	FAM129A	1.74254
ZNF561	0.0183693	0.116517	0.139	0.059	1	ZNF561	1.73591
ANKRD11	0.0184266	-0.196175	0.565	0.727	1	ANKRD11	1.73455
PHC3	0.018547	-0.19833	0.191	0.305	1	PHC3	1.73173
EEF1A1	0.0185475	-0.0817737	1	1	1	EEF1A1	1.73171
HINT3	0.0187104	0.109663	0.113	0.043	1	HINT3	1.72792
LYAR	0.0187229	-0.145147	0.174	0.316	1	LYAR	1.72763
CITED4	0.0188188	0.127214	0.313	0.198	1	CITED4	1.72541
MIR29B2CHG	0.0188364	0.127307	0.122	0.048	1	MIR29B2CHG	1.725
ACOT9	0.0192721	-0.161411	0.122	0.235	1	ACOT9	1.71507
FRG1	0.0193904	0.203115	0.435	0.316	1	FRG1	1.71241
EIF3F	0.0197027	-0.163705	0.774	0.861	1	EIF3F	1.70547
NISCH	0.0198216	0.123915	0.113	0.043	1	NISCH	1.70286
USO1	0.0198244	-0.159355	0.157	0.283	1	USO1	1.7028
MARK4	0.0199849	0.10928	0.113	0.043	1	MARK4	1.6993
CCDC28A	0.0201159	0.157605	0.304	0.193	1	CCDC28A	1.69646
NDUFA8	0.0201219	0.164223	0.339	0.225	1	NDUFA8	1.69633
FBXO38	0.0201494	0.112838	0.113	0.043	1	FBXO38	1.69574
SRP9	0.0201887	-0.205104	0.713	0.797	1	SRP9	1.69489
STAT5B	0.0202296	-0.0785851	0.2	0.342	1	STAT5B	1.69401
PLAA	0.020403	-0.145793	0.052	0.134	1	PLAA	1.69031
MRPL54	0.0205107	0.16541	0.617	0.519	1	MRPL54	1.68802
KIN	0.0206675	-0.20653	0.157	0.262	1	KIN	1.68471
ARHGAP27	0.0208261	-0.13038	0.052	0.134	1	ARHGAP27	1.68139
FAM49B	0.0208572	0.191923	0.73	0.62	1	FAM49B	1.68074
ZBTB14	0.0208672	-0.111023	0.052	0.139	1	ZBTB14	1.68054
SPAG7	0.0210218	0.14389	0.426	0.305	1	SPAG7	1.67733
C2orf74	0.0214539	-0.128181	0.061	0.15	1	C2orf74	1.66849
PPP4R2	0.021757	-0.165955	0.278	0.417	1	PPP4R2	1.6624
TIAM1	0.0217919	0.152649	0.183	0.096	1	TIAM1	1.6617
SFT2D2	0.0219311	0.14652	0.243	0.139	1	SFT2D2	1.65894
PRMT1	0.0219397	0.178414	0.478	0.374	1	PRMT1	1.65877
ERCC4	0.0220136	-0.120266	0.061	0.15	1	ERCC4	1.65731
LRRC8A	0.0220136	-0.120977	0.061	0.15	1	LRRC8A	1.65731
EDF1	0.0221122	-0.16561	0.861	0.877	1	EDF1	1.65537
CLASP2	0.022185	-0.1099	0.043	0.123	1	CLASP2	1.65394
MYBL1	0.0225859	-0.125439	0.061	0.15	1	MYBL1	1.64616
PTPA	0.0226615	-0.109829	0.043	0.123	1	PTPA	1.64471
LTA	0.0227873	-0.204543	0.078	0.171	1	LTA	1.64231
KHSRP	0.0227937	0.198297	0.217	0.128	1	KHSRP	1.64218
RPL4	0.0232263	-0.0991486	0.974	0.989	1	RPL4	1.63402
RASA2	0.0232532	-0.120053	0.191	0.316	1	RASA2	1.63352
RBM14	0.0233705	-0.128037	0.052	0.134	1	RBM14	1.63133
KBTBD2	0.0233705	-0.133325	0.052	0.134	1	KBTBD2	1.63133
RTN3	0.0233914	-0.144497	0.217	0.358	1	RTN3	1.63094
UBQLN2	0.0234173	0.143476	0.261	0.155	1	UBQLN2	1.63046
TINF2	0.0234716	-0.205795	0.217	0.337	1	TINF2	1.62946
RBM18	0.0235283	-0.128365	0.052	0.134	1	RBM18	1.62841
ZNF84	0.0235651	-0.129638	0.035	0.107	1	ZNF84	1.62773
RPL38	0.0237256	0.12056	0.991	0.995	1	RPL38	1.62478
KIAA1586	0.0241685	-0.112832	0.052	0.134	1	KIAA1586	1.61675
PSMB9	0.0241841	0.118044	0.939	0.861	1	PSMB9	1.61647
CMTM6	0.0242513	0.200751	0.817	0.765	1	CMTM6	1.61526
SMAD7	0.0242861	-0.136305	0.035	0.107	1	SMAD7	1.61464
ATP6V1F	0.0244108	0.105385	0.67	0.578	1	ATP6V1F	1.61242
TIPIN	0.0248393	-0.117367	0.035	0.107	1	TIPIN	1.60486
SMYD3	0.02499	-0.117432	0.052	0.134	1	SMYD3	1.60223
RPS8	0.0255013	-0.0924382	1	1	1	RPS8	1.59344
TBCC	0.0256329	0.150113	0.435	0.342	1	TBCC	1.5912
LDHB	0.0257181	-0.116048	0.93	0.968	1	LDHB	1.58976
UBE3C	0.0260076	-0.098799	0.052	0.134	1	UBE3C	1.5849
GPR108	0.0260919	-0.160179	0.183	0.299	1	GPR108	1.58349
MPST	0.0261203	-0.181352	0.174	0.283	1	MPST	1.58302
NECAP1	0.0263854	-0.15294	0.096	0.187	1	NECAP1	1.57864
CERS4	0.0264318	0.127328	0.148	0.07	1	CERS4	1.57787
PRF1	0.0264473	0.177036	0.339	0.23	1	PRF1	1.57762
MT-CO1	0.0264544	-0.0754022	1	1	1	MT-CO1	1.5775
CLPTM1	0.0266507	0.123018	0.2	0.107	1	CLPTM1	1.57429
NHP2	0.0267325	-0.161571	0.278	0.406	1	NHP2	1.57296
EBAG9	0.0267694	-0.16008	0.113	0.214	1	EBAG9	1.57236
GPATCH2	0.026804	-0.125345	0.113	0.219	1	GPATCH2	1.5718
UHMK1	0.0268693	-0.126977	0.226	0.348	1	UHMK1	1.57074
ANXA2	0.0270547	-0.209781	0.713	0.765	1	ANXA2	1.56776
STMP1	0.0270717	-0.138665	0.261	0.406	1	STMP1	1.56748
PHLDA3	0.0271627	-0.106506	0.035	0.107	1	PHLDA3	1.56603
PREX1	0.0274335	-0.18063	0.322	0.46	1	PREX1	1.56172
CLPP	0.0275187	0.102958	0.513	0.396	1	CLPP	1.56037
LDLRAD4	0.0277421	0.226233	0.252	0.166	1	LDLRAD4	1.55686
STX6	0.0278213	0.164114	0.165	0.086	1	STX6	1.55562
RNF168	0.0278328	-0.195169	0.235	0.358	1	RNF168	1.55544
TNFAIP8	0.027838	0.17614	0.687	0.567	1	TNFAIP8	1.55536
CHURC1	0.0280604	0.164724	0.67	0.583	1	CHURC1	1.55191
TMCO4	0.0283318	0.169837	0.113	0.048	1	TMCO4	1.54773
PPP1CB	0.0284058	-0.148757	0.374	0.535	1	PPP1CB	1.54659
GTF2H2	0.0285398	0.126056	0.174	0.091	1	GTF2H2	1.54455
PRDM8	0.0285453	0.0967891	0.13	0.059	1	PRDM8	1.54447
NECAB3	0.0286029	-0.084876	0.035	0.107	1	NECAB3	1.54359
LY96	0.0287091	0.230002	0.33	0.23	1	LY96	1.54198
CMC1	0.0289826	0.182057	0.374	0.283	1	CMC1	1.53786
PDP1	0.0290208	0.113066	0.148	0.07	1	PDP1	1.53729
TAOK1	0.0290247	0.150376	0.287	0.193	1	TAOK1	1.53723
PET100	0.029278	0.1698	0.47	0.39	1	PET100	1.53346
ECI2	0.0294047	-0.13715	0.113	0.214	1	ECI2	1.53158
ZFAND1	0.0294347	-0.171649	0.165	0.267	1	ZFAND1	1.53114
DIDO1	0.0294652	-0.117305	0.165	0.278	1	DIDO1	1.53069
LCP2	0.0294877	-0.167135	0.409	0.54	1	LCP2	1.53036
FAM160B1	0.0296416	0.1702	0.287	0.193	1	FAM160B1	1.5281
RAB5IF	0.0297377	-0.129255	0.243	0.39	1	RAB5IF	1.52669
ZNF821	0.0297823	0.120622	0.13	0.059	1	ZNF821	1.52604
WDR82	0.0298334	-0.199104	0.33	0.444	1	WDR82	1.5253
MAGT1	0.0301147	-0.128776	0.087	0.176	1	MAGT1	1.52122
RPL26L1	0.0303774	0.157449	0.27	0.176	1	RPL26L1	1.51745
ITCH	0.0304644	-0.14362	0.096	0.193	1	ITCH	1.51621
XRN1	0.0305068	0.249159	0.496	0.433	1	XRN1	1.5156
EMP3	0.0309868	-0.133773	0.93	0.952	1	EMP3	1.50882
ATF6B	0.031067	-0.14607	0.226	0.353	1	ATF6B	1.5077
UBXN6	0.0310712	-0.132917	0.078	0.166	1	UBXN6	1.50764
GNB1	0.0312478	0.191287	0.504	0.422	1	GNB1	1.50518
MPND	0.031308	-0.121528	0.052	0.128	1	MPND	1.50434
IFFO1	0.0317053	-0.117587	0.035	0.102	1	IFFO1	1.49887
CUEDC2	0.031768	-0.162294	0.191	0.31	1	CUEDC2	1.49801
TIMM17A	0.0317944	-0.158543	0.157	0.262	1	TIMM17A	1.49765
TRAPPC1	0.0324558	0.170728	0.748	0.642	1	TRAPPC1	1.48871
OASL	0.032546	0.103902	0.157	0.075	1	OASL	1.4875
FLOT1	0.0325883	-0.162603	0.148	0.257	1	FLOT1	1.48694
ZC3H15	0.0327633	-0.185606	0.47	0.594	1	ZC3H15	1.48461
GCLM	0.0329151	-0.131481	0.104	0.198	1	GCLM	1.4826
POLR2A	0.0330669	-0.132259	0.13	0.235	1	POLR2A	1.48061
TBL2	0.0330852	0.10424	0.122	0.053	1	TBL2	1.48037
GRAMD1A	0.0332862	-0.108116	0.191	0.321	1	GRAMD1A	1.47774
USP47	0.0333473	0.192415	0.383	0.278	1	USP47	1.47694
SNX2	0.0336893	0.195757	0.374	0.283	1	SNX2	1.47251
B2M	0.0338004	0.048946	1	1	1	B2M	1.47108
GTF2B	0.033887	0.161325	0.478	0.364	1	GTF2B	1.46997
RIC8B	0.034045	-0.0949823	0.043	0.118	1	RIC8B	1.46795
SYNCRIP	0.0340594	-0.138626	0.261	0.396	1	SYNCRIP	1.46776
KLF10	0.0340782	-0.111578	0.052	0.128	1	KLF10	1.46752
IFIT3	0.0344852	0.133313	0.113	0.048	1	IFIT3	1.46237
PIP5K1C	0.0345224	-0.109125	0.052	0.128	1	PIP5K1C	1.4619
XRRA1	0.0346544	0.164986	0.157	0.08	1	XRRA1	1.46024
RAB18	0.0347976	0.17335	0.4	0.289	1	RAB18	1.45845
UBC	0.0348384	0.110523	1	0.984	1	UBC	1.45794
KLHDC3	0.0348703	-0.12564	0.104	0.198	1	KLHDC3	1.45754
PTBP2	0.0348801	-0.104243	0.035	0.102	1	PTBP2	1.45742
PSME4	0.034938	0.163546	0.217	0.134	1	PSME4	1.4567
RGS1	0.0350917	0.177681	0.461	0.348	1	RGS1	1.4548
WDR83	0.0351352	-0.0978646	0.035	0.102	1	WDR83	1.45426
TIMM22	0.035237	0.146531	0.209	0.128	1	TIMM22	1.453
GOLGB1	0.0352645	-0.193061	0.426	0.535	1	GOLGB1	1.45266
TMEM50A	0.0352757	0.133961	0.809	0.749	1	TMEM50A	1.45252
GXYLT1	0.0354581	0.147846	0.13	0.064	1	GXYLT1	1.45028
MFSD12	0.0355864	-0.0967109	0.07	0.155	1	MFSD12	1.44872
NDUFA4	0.0356653	0.132303	0.957	0.888	1	NDUFA4	1.44775
RAB5A	0.0358291	0.180753	0.287	0.198	1	RAB5A	1.44576
PPIL4	0.0359051	-0.166485	0.2	0.321	1	PPIL4	1.44484
MARCKSL1	0.0366125	-0.16695	0.087	0.171	1	MARCKSL1	1.43637
GLIPR1	0.0367969	0.210542	0.391	0.294	1	GLIPR1	1.43419
LIMD2	0.0369038	-0.123815	0.852	0.93	1	LIMD2	1.43293
ANAPC1	0.0369198	0.162087	0.139	0.07	1	ANAPC1	1.43274
COX7A2	0.0371315	0.138718	0.87	0.781	1	COX7A2	1.43026
RFX7	0.0372931	-0.107486	0.052	0.128	1	RFX7	1.42837
MRPL39	0.0373901	-0.11489	0.087	0.176	1	MRPL39	1.42724
MOAP1	0.037467	-0.128938	0.13	0.23	1	MOAP1	1.42635
DGUOK	0.0375593	0.201384	0.548	0.476	1	DGUOK	1.42528
MAP3K14	0.0376972	-0.117928	0.043	0.112	1	MAP3K14	1.42369
ANAPC10	0.037735	0.116071	0.165	0.086	1	ANAPC10	1.42326
HGS	0.0378906	-0.129425	0.104	0.198	1	HGS	1.42147
FLNA	0.0379468	-0.15981	0.6	0.722	1	FLNA	1.42083
ZRSR2	0.0381317	0.177712	0.217	0.134	1	ZRSR2	1.41871
HAX1	0.0381746	0.175402	0.626	0.497	1	HAX1	1.41823
NT5C2	0.0382392	-0.0885485	0.061	0.139	1	NT5C2	1.41749
UBQLN1	0.0384139	-0.141692	0.165	0.273	1	UBQLN1	1.41551
CD81	0.0386708	-0.164664	0.478	0.599	1	CD81	1.41262
FLI1	0.0387645	0.207339	0.252	0.171	1	FLI1	1.41157
NDUFS2	0.0388703	0.161887	0.478	0.385	1	NDUFS2	1.41038
DGAT1	0.0388821	-0.0963097	0.113	0.214	1	DGAT1	1.41025
BRIX1	0.0390825	-0.163078	0.13	0.225	1	BRIX1	1.40802
DNAJC21	0.0391565	0.187288	0.487	0.401	1	DNAJC21	1.4072
PANK3	0.0392653	-0.106049	0.043	0.112	1	PANK3	1.40599
LYRM4	0.0392773	0.151199	0.296	0.198	1	LYRM4	1.40586
CSTF3	0.039295	-0.104154	0.078	0.16	1	CSTF3	1.40566
KIF1C	0.0393888	-0.125451	0.052	0.123	1	KIF1C	1.40463
CTDP1	0.0397612	-0.131595	0.087	0.171	1	CTDP1	1.40054
TMEM248	0.0398288	-0.14785	0.278	0.406	1	TMEM248	1.3998
ZNF92	0.0399834	-0.10239	0.183	0.289	1	ZNF92	1.39812
EXOC5	0.0400222	-0.0954743	0.104	0.203	1	EXOC5	1.3977
UBE2G2	0.0400803	-0.194782	0.183	0.294	1	UBE2G2	1.39707
ICAM2	0.0402679	-0.18383	0.313	0.439	1	ICAM2	1.39504
TSC22D2	0.040268	0.142864	0.13	0.064	1	TSC22D2	1.39504
HIST1H1E	0.040288	-0.119883	0.122	0.219	1	HIST1H1E	1.39482
HOXB2	0.0404485	-0.112363	0.174	0.283	1	HOXB2	1.3931
TRAFD1	0.0405358	0.137092	0.13	0.064	1	TRAFD1	1.39216
SDHAF2	0.0405907	-0.109293	0.191	0.31	1	SDHAF2	1.39157
CIR1	0.0408141	-0.140914	0.33	0.465	1	CIR1	1.38919
HADHB	0.0410597	0.144918	0.47	0.353	1	HADHB	1.38658
GMCL1	0.0412936	-0.132841	0.174	0.278	1	GMCL1	1.38412
COASY	0.0421346	-0.0684704	0.061	0.139	1	COASY	1.37536
AP1G1	0.0425691	0.143574	0.226	0.139	1	AP1G1	1.37091
HECTD1	0.0431768	0.162935	0.365	0.262	1	HECTD1	1.36475
LEO1	0.0431928	-0.0907176	0.139	0.246	1	LEO1	1.36459
BLVRB	0.0433543	-0.115309	0.052	0.123	1	BLVRB	1.36297
PAXX	0.0434342	0.175844	0.557	0.471	1	PAXX	1.36217
LSM5	0.0434624	-0.186819	0.287	0.396	1	LSM5	1.36189
SF3B3	0.0435107	-0.167152	0.174	0.278	1	SF3B3	1.3614
SYTL1	0.0437397	-0.160948	0.374	0.497	1	SYTL1	1.35912
FOXK1	0.0439582	0.126035	0.183	0.102	1	FOXK1	1.35696
BICDL1	0.0440211	-0.173077	0.2	0.299	1	BICDL1	1.35634
MRPS31	0.0440359	-0.091221	0.183	0.294	1	MRPS31	1.35619
RNASEH1	0.0441942	0.140166	0.191	0.112	1	RNASEH1	1.35464
PSMG3	0.0443719	0.139745	0.243	0.16	1	PSMG3	1.35289
RHOG	0.0443955	0.121577	0.67	0.594	1	RHOG	1.35266
MRPL37	0.0444325	-0.107126	0.07	0.15	1	MRPL37	1.3523
SH3KBP1	0.0444382	-0.155364	0.452	0.578	1	SH3KBP1	1.35224
PCNX1	0.0444686	0.145029	0.243	0.155	1	PCNX1	1.35195
ALG2	0.0444697	-0.0801992	0.061	0.139	1	ALG2	1.35194
CDKN2AIPNL	0.0444697	-0.0904506	0.061	0.139	1	CDKN2AIPNL	1.35194
H2AFX	0.0447794	-0.117529	0.096	0.182	1	H2AFX	1.34892
FAM114A2	0.044883	0.140022	0.183	0.107	1	FAM114A2	1.34792
ZNF830	0.0449777	-0.120012	0.191	0.31	1	ZNF830	1.347
LSM10	0.0451556	-0.107401	0.365	0.503	1	LSM10	1.34529
LSG1	0.0452809	-0.115838	0.07	0.144	1	LSG1	1.34408
RPL31	0.0457651	-0.132479	0.896	0.925	1	RPL31	1.33947
NRDC	0.0461746	-0.102433	0.304	0.428	1	NRDC	1.3356
ZNF622	0.0462574	-0.147079	0.148	0.246	1	ZNF622	1.33482
TTC31	0.0465106	-0.115298	0.043	0.107	1	TTC31	1.33245
GBP1	0.0465963	0.295912	0.478	0.385	1	GBP1	1.33165
RIOK2	0.0466248	0.18887	0.226	0.144	1	RIOK2	1.33138
MTDH	0.0469098	0.1523	0.774	0.695	1	MTDH	1.32874
GRSF1	0.0470336	0.128772	0.374	0.278	1	GRSF1	1.32759
AC078883.3	0.047261	-0.114828	0.061	0.134	1	AC078883.3	1.3255
UBE2F	0.0473756	-0.140772	0.157	0.257	1	UBE2F	1.32445
ZNF26	0.0474229	-0.127783	0.07	0.144	1	ZNF26	1.32401
CPNE2	0.04743	0.128727	0.13	0.064	1	CPNE2	1.32395
GGA3	0.0474557	0.119154	0.122	0.059	1	GGA3	1.32371
PRKCB	0.0475403	-0.154639	0.365	0.492	1	PRKCB	1.32294
CDC123	0.0478423	-0.123261	0.252	0.396	1	CDC123	1.32019
MYO9B	0.0479569	-0.13478	0.148	0.246	1	MYO9B	1.31915
IDS	0.0482314	-0.16575	0.426	0.551	1	IDS	1.31667
RHOF	0.0482764	0.0972228	0.522	0.422	1	RHOF	1.31626
ITGB2-AS1	0.0483978	-0.117385	0.096	0.182	1	ITGB2-AS1	1.31517
PPP1R3F	0.0484028	-0.0851616	0.07	0.15	1	PPP1R3F	1.31513
MIS12	0.0488567	0.114746	0.139	0.07	1	MIS12	1.31108
HPS4	0.0488567	-0.102855	0.052	0.123	1	HPS4	1.31108
STK38	0.0491075	-0.138801	0.322	0.439	1	STK38	1.30885
CPTP	0.0492788	0.141018	0.148	0.08	1	CPTP	1.30734
CYSLTR1	0.0495614	-0.129062	0.087	0.171	1	CYSLTR1	1.30486
TBRG4	0.0497109	-0.128737	0.087	0.166	1	TBRG4	1.30355
ARPP19	0.0497292	-0.131919	0.322	0.433	1	ARPP19	1.30339
PPP1R16B	0.0497752	-0.133609	0.13	0.219	1	PPP1R16B	1.30299
SMUG1	0.0498684	0.127569	0.148	0.08	1	SMUG1	1.30217
TP53	0.0498747	-0.147111	0.078	0.15	1	TP53	1.30212
NDUFS3	0.0499825	0.154471	0.374	0.267	1	NDUFS3	1.30118
PAFAH1B2	0.0502783	-0.151571	0.165	0.251	1	PAFAH1B2	1.29862
SLC4A7	0.0506204	0.174865	0.339	0.251	1	SLC4A7	1.29567
TUBA1B	0.0512682	0.19447	0.565	0.481	1	TUBA1B	1.29015
MAPK1IP1L	0.0516383	-0.155972	0.27	0.38	1	MAPK1IP1L	1.28703
KIAA1468	0.0520028	-0.108115	0.078	0.155	1	KIAA1468	1.28397
UBA52	0.0520604	-0.0812166	1	1	1	UBA52	1.28349
LAS1L	0.0522863	0.150594	0.148	0.08	1	LAS1L	1.28161
STARD10	0.0522863	-0.100437	0.061	0.134	1	STARD10	1.28161
ABI3	0.0523067	-0.109733	0.052	0.118	1	ABI3	1.28144
BTF3	0.052307	-0.0883498	0.991	1	1	BTF3	1.28144
JUNB	0.0523209	-0.0891379	0.635	0.749	1	JUNB	1.28132
HSDL2	0.0523669	-0.137911	0.122	0.214	1	HSDL2	1.28094
NFKBIE	0.0526805	-0.132517	0.061	0.128	1	NFKBIE	1.27835
HNRNPA1	0.0526991	0.119562	0.948	0.941	1	HNRNPA1	1.2782
RC3H1	0.0526999	-0.121543	0.087	0.166	1	RC3H1	1.27819
DDX42	0.0527617	0.142906	0.322	0.235	1	DDX42	1.27768
ARL6IP4	0.0527949	0.107334	0.87	0.818	1	ARL6IP4	1.27741
ZNF563	0.0529098	0.116164	0.113	0.053	1	ZNF563	1.27646
RIDA	0.0531213	-0.11281	0.043	0.107	1	RIDA	1.27473
IWS1	0.053144	0.187007	0.33	0.246	1	IWS1	1.27455
SH3GL1	0.0532765	-0.0670483	0.052	0.123	1	SH3GL1	1.27346
ACYP2	0.0532967	-0.108171	0.052	0.118	1	ACYP2	1.2733
MRPL24	0.053313	-0.110711	0.061	0.128	1	MRPL24	1.27317
RNF216	0.0535431	0.174664	0.27	0.193	1	RNF216	1.2713
WDR3	0.0536301	-0.10588	0.052	0.118	1	WDR3	1.27059
FEM1C	0.0536531	0.108546	0.104	0.048	1	FEM1C	1.27041
GIMAP4	0.0537288	0.117048	0.843	0.759	1	GIMAP4	1.26979
PKNOX1	0.0539344	-0.080118	0.052	0.123	1	PKNOX1	1.26813
NFKBID	0.0541776	0.122821	0.122	0.059	1	NFKBID	1.26618
SETD4	0.0544209	0.102323	0.104	0.048	1	SETD4	1.26423
CASC4	0.0544645	-0.0991089	0.096	0.187	1	CASC4	1.26389
HIF1AN	0.0546167	-0.114537	0.078	0.155	1	HIF1AN	1.26267
CD55	0.0546253	-0.11926	0.27	0.369	1	CD55	1.26261
NDRG1	0.0547779	-0.113405	0.304	0.444	1	NDRG1	1.26139
B3GALT6	0.054832	0.108048	0.157	0.086	1	B3GALT6	1.26097
USP36	0.0551338	0.138307	0.139	0.075	1	USP36	1.25858
PSMA2	0.0551573	0.166557	0.522	0.417	1	PSMA2	1.2584
ZNF217	0.0551676	-0.127115	0.139	0.23	1	ZNF217	1.25832
VASP	0.0551737	-0.174054	0.409	0.529	1	VASP	1.25827
LUCAT1	0.0551977	0.112023	0.104	0.048	1	LUCAT1	1.25808
FEN1	0.0551977	0.110155	0.104	0.048	1	FEN1	1.25808
ITPR2	0.055293	0.156897	0.33	0.246	1	ITPR2	1.25733
SNHG9	0.0553236	-0.10894	0.052	0.118	1	SNHG9	1.25709
ORAOV1	0.0554923	0.105202	0.113	0.053	1	ORAOV1	1.25577
TTC19	0.0556357	0.19677	0.374	0.294	1	TTC19	1.25465
PSMC5	0.05594	0.0989906	0.73	0.61	1	PSMC5	1.25228
DIMT1	0.0560002	-0.120942	0.113	0.203	1	DIMT1	1.25181
RPL7	0.0560376	-0.0835863	1	1	1	RPL7	1.25152
LRCH3	0.0561513	-0.140682	0.122	0.209	1	LRCH3	1.25064
ATMIN	0.056687	-0.124552	0.113	0.198	1	ATMIN	1.24652
CCT8	0.056843	0.17405	0.635	0.599	1	CCT8	1.24532
PIM3	0.0568606	-0.11002	0.357	0.465	1	PIM3	1.24519
FBXO42	0.0570146	0.115099	0.113	0.053	1	FBXO42	1.24401
SRGAP2	0.0570843	0.117663	0.148	0.08	1	SRGAP2	1.24348
NCF4	0.057458	0.115702	0.626	0.497	1	NCF4	1.24065
OGFR	0.0575767	-0.150618	0.191	0.289	1	OGFR	1.23975
KARS	0.0577817	-0.156821	0.183	0.278	1	KARS	1.23821
SLC12A9	0.0578949	0.132488	0.191	0.118	1	SLC12A9	1.23736
RAB29	0.0581492	-0.123392	0.348	0.471	1	RAB29	1.23546
AC027644.3	0.058179	0.0888267	0.113	0.053	1	AC027644.3	1.23523
RALGDS	0.0581872	-0.11363	0.252	0.38	1	RALGDS	1.23517
CSF2RB	0.0582715	-0.111816	0.078	0.155	1	CSF2RB	1.23454
GOLGA2	0.0584687	-0.0643554	0.07	0.144	1	GOLGA2	1.23308
GABPA	0.0585796	-0.0833294	0.043	0.107	1	GABPA	1.23225
SRRD	0.0586291	-0.100191	0.096	0.176	1	SRRD	1.23189
GHITM	0.0586341	-0.111719	0.504	0.615	1	GHITM	1.23185
SERPINB9	0.0588774	-0.113291	0.252	0.364	1	SERPINB9	1.23005
ZNF207	0.0589414	-0.162301	0.426	0.567	1	ZNF207	1.22958
RNF145	0.0589425	0.193361	0.339	0.262	1	RNF145	1.22957
SAMSN1	0.059112	-0.138182	0.452	0.578	1	SAMSN1	1.22832
MAP4K4	0.0596856	0.151371	0.339	0.251	1	MAP4K4	1.22413
AC127521.1	0.059753	0.11147	0.13	0.07	1	AC127521.1	1.22364
MDH1	0.0597879	0.138008	0.678	0.529	1	MDH1	1.22339
CALR	0.0598784	-0.106473	0.704	0.824	1	CALR	1.22273
PRR5	0.0599927	-0.0975326	0.061	0.128	1	PRR5	1.2219
CEP120	0.0599927	-0.115914	0.061	0.128	1	CEP120	1.2219
SIGIRR	0.0601274	-0.155619	0.461	0.599	1	SIGIRR	1.22093
HEMK1	0.0603037	-0.0898375	0.052	0.118	1	HEMK1	1.21966
ELF2	0.0606609	0.189368	0.313	0.241	1	ELF2	1.21709
UQCC2	0.060714	-0.101487	0.235	0.364	1	UQCC2	1.21671
BAG6	0.0607574	0.144283	0.165	0.096	1	BAG6	1.2164
AHCYL1	0.0607676	-0.149514	0.2	0.299	1	AHCYL1	1.21633
CSNK2A1	0.060841	-0.14906	0.235	0.332	1	CSNK2A1	1.2158
DGCR6L	0.0609707	0.162196	0.33	0.241	1	DGCR6L	1.21488
ERAP2	0.0609801	0.0750319	0.409	0.294	1	ERAP2	1.21481
YPEL2	0.0611292	-0.131738	0.226	0.332	1	YPEL2	1.21375
AC133644.2	0.0614944	0.200526	0.652	0.572	1	AC133644.2	1.21116
NBEAL2	0.061634	-0.115271	0.122	0.209	1	NBEAL2	1.21018
ATAD2	0.0617821	0.147201	0.183	0.112	1	ATAD2	1.20914
SNRNP48	0.061793	-0.095484	0.052	0.118	1	SNRNP48	1.20906
VRK3	0.0619677	0.113324	0.243	0.155	1	VRK3	1.20783
RPL10A	0.0623323	-0.0799971	0.991	1	1	RPL10A	1.20529
HDDC3	0.062484	-0.107038	0.104	0.187	1	HDDC3	1.20423
NSMCE2	0.0627317	0.147367	0.183	0.112	1	NSMCE2	1.20251
HLA-B	0.0629063	0.072012	1	1	1	HLA-B	1.20131
INTS11	0.0629755	-0.124599	0.165	0.262	1	INTS11	1.20083
AC017002.3	0.0631293	0.113025	0.209	0.128	1	AC017002.3	1.19977
IL2RG	0.063137	-0.0974384	0.783	0.861	1	IL2RG	1.19972
PSMA1	0.0633234	-0.128152	0.591	0.711	1	PSMA1	1.19844
BRWD1	0.0633836	-0.119044	0.235	0.342	1	BRWD1	1.19802
BBX	0.0633873	0.180125	0.417	0.342	1	BBX	1.198
FBXO8	0.0634259	-0.108234	0.078	0.15	1	FBXO8	1.19773
EIF4B	0.0635403	-0.169995	0.643	0.738	1	EIF4B	1.19695
PAG1	0.0636315	-0.152175	0.417	0.529	1	PAG1	1.19633
SNAP23	0.0637728	-0.088688	0.122	0.214	1	SNAP23	1.19536
SUMO4	0.0638585	0.108365	0.235	0.15	1	SUMO4	1.19478
COMMD5	0.0639241	-0.132529	0.157	0.246	1	COMMD5	1.19434
DHRS4L2	0.0640165	0.151439	0.183	0.112	1	DHRS4L2	1.19371
NMT2	0.0642781	0.127276	0.13	0.07	1	NMT2	1.19194
FERMT3	0.0648373	0.166587	0.539	0.492	1	FERMT3	1.18817
HSP90B1	0.0648855	-0.198026	0.513	0.626	1	HSP90B1	1.18785
STK24	0.0649692	0.156208	0.443	0.348	1	STK24	1.18729
FAM126B	0.0652494	-0.117993	0.07	0.139	1	FAM126B	1.18542
CUX1	0.0652556	-0.0949214	0.052	0.118	1	CUX1	1.18538
RBM5	0.0659454	0.164905	0.374	0.283	1	RBM5	1.18082
HMG20B	0.0660311	0.176918	0.252	0.176	1	HMG20B	1.18025
MTPN	0.066795	0.144888	0.496	0.412	1	MTPN	1.17526
C1orf123	0.0668023	0.137843	0.235	0.15	1	C1orf123	1.17521
CAAP1	0.06689	-0.0850513	0.078	0.155	1	CAAP1	1.17464
AGMAT	0.067335	0.0478636	0.113	0.053	1	AGMAT	1.17176
CDK7	0.0674478	-0.0921437	0.043	0.102	1	CDK7	1.17103
ANXA2R	0.0676359	0.135694	0.33	0.251	1	ANXA2R	1.16982
NOA1	0.0679404	-0.0917383	0.139	0.23	1	NOA1	1.16787
SAC3D1	0.0681273	-0.0914421	0.061	0.128	1	SAC3D1	1.16668
WEE1	0.0682232	0.0871074	0.113	0.053	1	WEE1	1.16607
CCDC186	0.0685777	0.0949273	0.435	0.337	1	CCDC186	1.16382
AP2S1	0.0686354	-0.121875	0.478	0.594	1	AP2S1	1.16345
CYFIP2	0.0687518	-0.122576	0.365	0.487	1	CYFIP2	1.16272
MAPKAPK3	0.068779	-0.136723	0.243	0.348	1	MAPKAPK3	1.16254
PAFAH1B1	0.0688874	0.161365	0.461	0.385	1	PAFAH1B1	1.16186
RNF113A	0.0691016	-0.139861	0.191	0.283	1	RNF113A	1.16051
NELFA	0.069406	-0.076293	0.096	0.176	1	NELFA	1.1586
SUPT5H	0.069432	-0.174462	0.148	0.225	1	SUPT5H	1.15844
ZNF836	0.0700917	-0.0879425	0.043	0.102	1	ZNF836	1.15433
NEPRO	0.0703354	-0.0870452	0.13	0.219	1	NEPRO	1.15283
CELF2	0.0703424	-0.148981	0.496	0.631	1	CELF2	1.15278
GANAB	0.0704142	0.13652	0.217	0.144	1	GANAB	1.15234
COMMD2	0.0704793	-0.0990728	0.191	0.299	1	COMMD2	1.15194
MFHAS1	0.0714379	-0.0967116	0.165	0.257	1	MFHAS1	1.14607
HLA-DQA1	0.0720028	-0.105903	0.278	0.385	1	HLA-DQA1	1.14265
SLC25A12	0.0722097	0.1043	0.122	0.064	1	SLC25A12	1.1414
ANKRD28	0.0723594	0.128859	0.113	0.059	1	ANKRD28	1.14051
DBNL	0.0728544	-0.109559	0.383	0.513	1	DBNL	1.13754
PGAP1	0.0729037	0.093088	0.148	0.08	1	PGAP1	1.13725
PLIN2	0.0731	-0.110569	0.278	0.39	1	PLIN2	1.13608
ABR	0.0731556	-0.105071	0.078	0.15	1	ABR	1.13575
RPS13	0.0734596	-0.0804141	1	1	1	RPS13	1.13395
RAD23A	0.0736377	0.187612	0.53	0.471	1	RAD23A	1.1329
ADGRE5	0.073673	-0.0873039	0.13	0.214	1	ADGRE5	1.13269
CARHSP1	0.0739762	0.138185	0.487	0.433	1	CARHSP1	1.13091
NPC1	0.0741138	0.105968	0.191	0.118	1	NPC1	1.1301
C19orf12	0.0744938	-0.120741	0.183	0.273	1	C19orf12	1.12788
ITGAL	0.0745057	-0.20091	0.409	0.492	1	ITGAL	1.12781
NDUFA2	0.0745106	-0.167965	0.478	0.578	1	NDUFA2	1.12778
PDPK1	0.0745437	0.133461	0.183	0.112	1	PDPK1	1.12759
PQBP1	0.0746637	-0.116767	0.243	0.348	1	PQBP1	1.12689
ZNF701	0.074715	-0.106527	0.096	0.171	1	ZNF701	1.12659
MAP1LC3B	0.0747746	-0.122948	0.513	0.647	1	MAP1LC3B	1.12625
DGLUCY	0.0748755	0.129517	0.339	0.246	1	DGLUCY	1.12566
NUP98	0.0749291	-0.0972292	0.122	0.209	1	NUP98	1.12535
SLC9A9	0.0751522	-0.0757511	0.052	0.112	1	SLC9A9	1.12406
SETD1B	0.0753759	0.133391	0.191	0.118	1	SETD1B	1.12277
RAB28	0.075414	-0.10974	0.061	0.123	1	RAB28	1.12255
CS	0.0758445	-0.0957888	0.061	0.123	1	CS	1.12008
TERF2IP	0.0759534	0.180059	0.748	0.69	1	TERF2IP	1.11945
RAB2A	0.0759751	0.165278	0.478	0.406	1	RAB2A	1.11933
ABCB8	0.0760477	-0.132245	0.07	0.134	1	ABCB8	1.11891
AP3M2	0.0762107	-0.105569	0.243	0.342	1	AP3M2	1.11798
ZNF230	0.0762803	0.0927985	0.122	0.064	1	ZNF230	1.11759
ZNF766	0.0763047	-0.134579	0.174	0.262	1	ZNF766	1.11745
SLC35E2B	0.0763898	0.0936484	0.13	0.07	1	SLC35E2B	1.11696
RNPC3	0.0764226	-0.0987244	0.07	0.139	1	RNPC3	1.11678
NEU1	0.076585	0.112355	0.183	0.112	1	NEU1	1.11586
PSMD12	0.0767913	0.128498	0.452	0.364	1	PSMD12	1.11469
CCNL2	0.0771701	0.109872	0.322	0.241	1	CCNL2	1.11255
SIPA1	0.0773671	0.120312	0.452	0.374	1	SIPA1	1.11144
ZNF592	0.0774549	-0.0865909	0.078	0.15	1	ZNF592	1.11095
TPK1	0.07756	0.120021	0.113	0.059	1	TPK1	1.11036
ENSA	0.0780347	-0.158287	0.4	0.471	1	ENSA	1.10771
ARNTL	0.0780915	-0.0631117	0.087	0.166	1	ARNTL	1.1074
ZRANB2	0.0780939	-0.0860762	0.4	0.535	1	ZRANB2	1.10738
PKN2	0.0782286	-0.0850881	0.113	0.198	1	PKN2	1.10663
CCNT1	0.07835	-0.0995957	0.052	0.112	1	CCNT1	1.10596
IFNAR1	0.0784041	-0.114056	0.183	0.267	1	IFNAR1	1.10566
XBP1	0.0784864	-0.117082	0.157	0.251	1	XBP1	1.10521
EIF2S1	0.0785167	0.145882	0.348	0.267	1	EIF2S1	1.10504
PLEKHB2	0.0786312	-0.127439	0.217	0.305	1	PLEKHB2	1.10441
HLA-E	0.0787348	0.0820085	0.983	0.995	1	HLA-E	1.10383
MX1	0.0788651	0.211427	0.4	0.326	1	MX1	1.10312
CAPRIN2	0.0790301	-0.0574486	0.043	0.102	1	CAPRIN2	1.10221
ZBTB8OS	0.0790514	0.151788	0.409	0.332	1	ZBTB8OS	1.10209
SMAD3	0.0791306	-0.123648	0.113	0.193	1	SMAD3	1.10166
CHMP3	0.0791826	-0.102845	0.165	0.262	1	CHMP3	1.10137
NUP62	0.0792232	-0.115018	0.139	0.219	1	NUP62	1.10115
DESI1	0.0793372	0.162865	0.278	0.209	1	DESI1	1.10052
RFX3	0.0795251	0.119686	0.113	0.059	1	RFX3	1.0995
TRAPPC6B	0.0795637	-0.119481	0.139	0.219	1	TRAPPC6B	1.09929
MRPL32	0.0797727	-0.125355	0.278	0.374	1	MRPL32	1.09815
MEA1	0.0800925	0.143028	0.261	0.182	1	MEA1	1.09641
SH2D2A	0.0801099	0.191027	0.548	0.476	1	SH2D2A	1.09631
CKAP2	0.0801988	0.120207	0.209	0.128	1	CKAP2	1.09583
UBE2J1	0.0802482	-0.131267	0.139	0.219	1	UBE2J1	1.09556
DNAJC8	0.0804662	-0.103553	0.626	0.727	1	DNAJC8	1.09439
RAMMET	0.0805013	0.141679	0.391	0.332	1	RAMMET	1.0942
GRPEL1	0.0805954	0.119096	0.287	0.203	1	GRPEL1	1.09369
PGP	0.0806002	0.170914	0.426	0.348	1	PGP	1.09366
ACAA1	0.0806712	-0.132157	0.33	0.433	1	ACAA1	1.09328
PPDPF	0.080989	-0.136777	0.774	0.802	1	PPDPF	1.09157
ZCCHC10	0.0811373	-0.105582	0.113	0.193	1	ZCCHC10	1.09078
LAIR1	0.0814411	0.115013	0.2	0.128	1	LAIR1	1.08916
LPAR2	0.0815067	0.14494	0.183	0.118	1	LPAR2	1.08881
MAD2L1	0.0816652	-0.114405	0.078	0.144	1	MAD2L1	1.08796
PACS1	0.0818308	0.0928869	0.339	0.246	1	PACS1	1.08708
PPM1B	0.0818329	0.117633	0.252	0.176	1	PPM1B	1.08707
NIFK	0.0819554	-0.121684	0.27	0.385	1	NIFK	1.08642
WDR75	0.0820326	-0.0939169	0.07	0.134	1	WDR75	1.08601
NKIRAS2	0.0821487	0.107576	0.157	0.091	1	NKIRAS2	1.0854
EEF1D	0.0822606	0.0817962	1	0.995	1	EEF1D	1.08481
MCM5	0.0824885	0.090704	0.122	0.064	1	MCM5	1.08361
NIPA2	0.0825751	0.11382	0.226	0.15	1	NIPA2	1.08315
TMED7	0.082576	0.125016	0.2	0.128	1	TMED7	1.08315
DDX41	0.0826234	-0.0787909	0.052	0.112	1	DDX41	1.0829
MON2	0.0826234	-0.0963295	0.052	0.112	1	MON2	1.0829
DCTN2	0.0831377	-0.103974	0.313	0.449	1	DCTN2	1.0802
CARD11	0.0833788	0.155023	0.2	0.134	1	CARD11	1.07894
KHNYN	0.0835983	-0.0299326	0.052	0.112	1	KHNYN	1.0778
FAM43A	0.0835983	-0.0929047	0.052	0.112	1	FAM43A	1.0778
ARPC2	0.0839488	0.0573634	0.983	0.989	1	ARPC2	1.07599
FLII	0.0840288	-0.0944967	0.2	0.289	1	FLII	1.07557
MAP4K1	0.0840509	-0.161941	0.157	0.235	1	MAP4K1	1.07546
PAF1	0.0840892	-0.0451938	0.052	0.112	1	PAF1	1.07526
ZNF581	0.0841089	0.135638	0.2	0.128	1	ZNF581	1.07516
SSB	0.0844975	0.125977	0.626	0.535	1	SSB	1.07316
SMIM15	0.0846498	-0.117968	0.209	0.299	1	SMIM15	1.07237
RBM8A	0.0850616	0.110709	0.704	0.62	1	RBM8A	1.07027
MTIF2	0.0852737	-0.0663962	0.104	0.187	1	MTIF2	1.06918
VPS29	0.0854875	-0.152268	0.383	0.481	1	VPS29	1.0681
MFSD8	0.0855491	0.135801	0.165	0.102	1	MFSD8	1.06778
RHBDD2	0.08562	-0.131733	0.096	0.166	1	RHBDD2	1.06742
PILRB	0.0856206	-0.0889549	0.07	0.134	1	PILRB	1.06742
GUSB	0.0856395	0.127073	0.313	0.225	1	GUSB	1.06733
SMG6	0.0856676	-0.133875	0.174	0.251	1	SMG6	1.06718
AC023157.3	0.0857442	0.126955	0.104	0.053	1	AC023157.3	1.0668
NDUFB7	0.085916	0.11037	0.687	0.663	1	NDUFB7	1.06593
MT-CO2	0.0860371	-0.0475859	1	1	1	MT-CO2	1.06531
PSMG4	0.0860448	-0.110163	0.113	0.193	1	PSMG4	1.06528
MPHOSPH10	0.0861504	0.140593	0.357	0.267	1	MPHOSPH10	1.06474
MAGEH1	0.0863497	0.210834	0.27	0.193	1	MAGEH1	1.06374
MPV17	0.086528	-0.129308	0.096	0.16	1	MPV17	1.06284
RNH1	0.086732	0.149758	0.557	0.439	1	RNH1	1.06182
VAMP4	0.0867699	-0.102605	0.2	0.294	1	VAMP4	1.06163
SAFB	0.086779	0.155736	0.417	0.348	1	SAFB	1.06159
INTS8	0.0868945	-0.110847	0.13	0.214	1	INTS8	1.06101
MED21	0.0869352	-0.0825142	0.113	0.198	1	MED21	1.0608
RASSF1	0.0870359	-0.0948555	0.122	0.203	1	RASSF1	1.0603
BTN2A1	0.0870838	-0.0757463	0.052	0.112	1	BTN2A1	1.06006
DYNLRB1	0.0873747	-0.146383	0.67	0.759	1	DYNLRB1	1.05861
DCTN3	0.0874036	-0.134116	0.409	0.513	1	DCTN3	1.05847
AMIGO2	0.0874044	0.107906	0.104	0.053	1	AMIGO2	1.05847
LBR	0.0874168	0.122786	0.591	0.508	1	LBR	1.0584
ARL4A	0.0874615	-0.0907863	0.07	0.134	1	ARL4A	1.05818
MALAT1	0.0875361	0.0581994	1	1	1	MALAT1	1.05781
SUPT4H1	0.0875378	-0.0470015	0.348	0.487	1	SUPT4H1	1.0578
TRPC4AP	0.0876021	-0.0760652	0.113	0.193	1	TRPC4AP	1.05749
NLRC3	0.0877085	0.164096	0.357	0.283	1	NLRC3	1.05696
RBMX	0.0879382	0.117047	0.635	0.524	1	RBMX	1.05582
SEMA4D	0.088005	-0.118797	0.235	0.326	1	SEMA4D	1.05549
BORCS5	0.0880454	0.113599	0.243	0.166	1	BORCS5	1.05529
VPS36	0.0882087	-0.10612	0.278	0.401	1	VPS36	1.05449
TMED9	0.0883363	0.140106	0.487	0.412	1	TMED9	1.05386
CEP164	0.0883892	-0.0727558	0.113	0.193	1	CEP164	1.0536
PCGF5	0.0883919	-0.12501	0.191	0.289	1	PCGF5	1.05359
LEPROTL1	0.0884233	0.115475	0.826	0.765	1	LEPROTL1	1.05343
DHX29	0.0885236	-0.116767	0.217	0.305	1	DHX29	1.05294
SLC38A10	0.0885471	0.123801	0.217	0.15	1	SLC38A10	1.05283
PINK1	0.0886578	-0.0915132	0.078	0.144	1	PINK1	1.05228
PRPF39	0.0888631	-0.086487	0.07	0.134	1	PRPF39	1.05128
PNISR	0.088866	0.117124	0.887	0.898	1	PNISR	1.05126
SELENOF	0.0890893	0.126795	0.565	0.503	1	SELENOF	1.05017
LYRM1	0.0891114	-0.0972847	0.087	0.155	1	LYRM1	1.05007
DMAP1	0.0893159	-0.0772892	0.122	0.209	1	DMAP1	1.04907
RYR1	0.0894187	0.0882645	0.113	0.059	1	RYR1	1.04857
BTN3A3	0.0894411	-0.0770514	0.13	0.209	1	BTN3A3	1.04846
SCAF4	0.0899909	-0.0927957	0.087	0.155	1	SCAF4	1.0458
ELOB	0.0901564	0.101005	0.878	0.829	1	ELOB	1.045
ERCC6L2	0.0907116	-0.0665531	0.061	0.123	1	ERCC6L2	1.04234
TPM4	0.0908188	0.202432	0.687	0.663	1	TPM4	1.04182
SPTY2D1	0.0908567	-0.110264	0.113	0.187	1	SPTY2D1	1.04164
PPP6R1	0.0909155	0.172088	0.296	0.225	1	PPP6R1	1.04136
PML	0.0911892	-0.0618674	0.113	0.193	1	PML	1.04006
ANKRD36B	0.0912693	0.139127	0.165	0.102	1	ANKRD36B	1.03968
LSP1	0.0914055	-0.0931787	0.774	0.818	1	LSP1	1.03903
ZMAT5	0.0915289	0.0989038	0.183	0.112	1	ZMAT5	1.03844
TAF1	0.0917205	0.107943	0.148	0.086	1	TAF1	1.03753
BABAM1	0.0918858	-0.123816	0.235	0.321	1	BABAM1	1.03675
SRSF9	0.0919508	0.0935479	0.783	0.775	1	SRSF9	1.03644
BLCAP	0.0920502	0.107383	0.191	0.123	1	BLCAP	1.03598
LINC01727	0.0920593	-0.0740887	0.078	0.15	1	LINC01727	1.03593
MT-CYB	0.0922908	-0.056608	1	1	1	MT-CYB	1.03484
ALAS1	0.0925304	0.0936172	0.157	0.091	1	ALAS1	1.03372
MTO1	0.092632	0.109874	0.165	0.102	1	MTO1	1.03324
SACS	0.092663	-0.149881	0.183	0.267	1	SACS	1.03309
ZFP36L2	0.0927938	-0.0953372	0.73	0.802	1	ZFP36L2	1.03248
ATF7IP2	0.0928991	-0.144482	0.104	0.176	1	ATF7IP2	1.03199
BORCS8	0.0933211	-0.11442	0.122	0.198	1	BORCS8	1.03002
LIMK2	0.0933832	0.125099	0.13	0.075	1	LIMK2	1.02973
ATG3	0.0934044	-0.100913	0.217	0.321	1	ATG3	1.02963
NSFL1C	0.0934149	0.179299	0.261	0.198	1	NSFL1C	1.02958
CREBL2	0.0935033	-0.0817513	0.078	0.144	1	CREBL2	1.02917
SMCHD1	0.0939164	0.0973088	0.852	0.759	1	SMCHD1	1.02726
TMED4	0.0939766	-0.15316	0.391	0.487	1	TMED4	1.02698
DEGS1	0.0940011	-0.113952	0.252	0.364	1	DEGS1	1.02687
PBRM1	0.0941521	-0.121406	0.235	0.326	1	PBRM1	1.02617
ZNF174	0.0943059	0.0782805	0.104	0.053	1	ZNF174	1.02546
FBXO25	0.0944247	-0.108086	0.061	0.118	1	FBXO25	1.02491
U2SURP	0.094596	-0.129293	0.417	0.519	1	U2SURP	1.02413
EPB41L4A-AS1	0.0946576	-0.0957969	0.252	0.342	1	EPB41L4A-AS1	1.02384
DEDD2	0.0947295	-0.0908466	0.183	0.273	1	DEDD2	1.02351
RPL6	0.094812	-0.0593284	1	1	1	RPL6	1.02314
NEDD1	0.0948483	0.132246	0.217	0.15	1	NEDD1	1.02297
RFNG	0.0948739	-0.107373	0.07	0.128	1	RFNG	1.02285
FAM168B	0.0949489	-0.10357	0.061	0.118	1	FAM168B	1.02251
COQ5	0.0954043	0.129287	0.157	0.096	1	COQ5	1.02043
SNAP47	0.0956446	-0.14243	0.252	0.342	1	SNAP47	1.01934
USP12	0.0957015	-0.0894504	0.104	0.176	1	USP12	1.01908
ZUP1	0.0958788	-0.09164	0.087	0.155	1	ZUP1	1.01828
URI1	0.0960043	-0.100274	0.365	0.471	1	URI1	1.01771
TAGAP	0.0963649	0.126871	0.278	0.198	1	TAGAP	1.01608
PRKCH	0.0965445	-0.110572	0.443	0.535	1	PRKCH	1.01527
SLC44A2	0.0967553	-0.0912386	0.139	0.219	1	SLC44A2	1.01433
WNK1	0.0968826	-0.116871	0.374	0.481	1	WNK1	1.01375
ZFAND6	0.09712	-0.090796	0.287	0.401	1	ZFAND6	1.01269
TXN2	0.0973749	-0.122698	0.27	0.358	1	TXN2	1.01155
WDR59	0.0974127	-0.097375	0.07	0.128	1	WDR59	1.01138
NAPA	0.0975797	-0.0579425	0.078	0.144	1	NAPA	1.01064
THOC2	0.0976267	-0.157409	0.304	0.406	1	THOC2	1.01043
CLINT1	0.0977156	-0.134776	0.33	0.444	1	CLINT1	1.01004
B4GALT7	0.0978166	-0.0805145	0.052	0.107	1	B4GALT7	1.00959
COX7A2L	0.0980632	-0.118003	0.548	0.658	1	COX7A2L	1.00849
VRK1	0.0981309	-0.0117551	0.122	0.209	1	VRK1	1.00819
ATP5PF	0.0982502	-0.107087	0.687	0.791	1	ATP5PF	1.00767
CTBS	0.0982509	-0.14012	0.174	0.251	1	CTBS	1.00766
BICD1	0.0983832	-0.0964996	0.052	0.107	1	BICD1	1.00708
GIMAP7	0.0985255	0.211546	0.835	0.749	1	GIMAP7	1.00645
DNASE2	0.0985659	0.102811	0.235	0.16	1	DNASE2	1.00627
AC068491.3	0.0986753	-0.0780622	0.07	0.134	1	AC068491.3	1.00579
EIF1B	0.0987008	-0.130983	0.496	0.626	1	EIF1B	1.00568
APOL3	0.0987433	0.150355	0.391	0.316	1	APOL3	1.00549
CD52	0.098766	-0.0810435	0.983	1	1	CD52	1.00539
CCDC25	0.0988454	-0.138947	0.191	0.262	1	CCDC25	1.00504
DIP2B	0.0989525	-0.0916112	0.052	0.107	1	DIP2B	1.00457
DLD	0.099191	-0.105509	0.104	0.171	1	DLD	1.00353
POLB	0.0992271	-0.0977079	0.061	0.118	1	POLB	1.00337
NUP214	0.0993492	-0.118277	0.078	0.139	1	NUP214	1.00284
GON4L	0.0994118	-0.0596545	0.287	0.385	1	GON4L	1.00256
COPS9	0.0994446	-0.0915293	0.452	0.588	1	COPS9	1.00242
PPP4R3A	0.099548	-0.103999	0.33	0.417	1	PPP4R3A	1.00197
RPS6KB1	0.0995701	0.164794	0.209	0.144	1	RPS6KB1	1.00187
EIF2AK2	0.0996604	0.175198	0.417	0.326	1	EIF2AK2	1.00148
MLF2	0.100004	-0.11781	0.261	0.348	1	MLF2	0.999983
DHX8	0.100068	-0.101952	0.096	0.166	1	DHX8	0.999706
NDUFAF1	0.10032	-0.101706	0.061	0.118	1	NDUFAF1	0.998611
CISD1	0.100347	0.174603	0.278	0.209	1	CISD1	0.998496
HIVEP3	0.100371	-0.0770059	0.104	0.176	1	HIVEP3	0.998391
PPP1R3E	0.100676	-0.0914665	0.052	0.107	1	PPP1R3E	0.997074
RRS1	0.100777	-0.120859	0.148	0.225	1	RRS1	0.996637
DLG1	0.101117	0.111568	0.209	0.139	1	DLG1	0.995175
AC100810.1	0.101259	0.0966307	0.148	0.086	1	AC100810.1	0.994567
BLMH	0.101545	-0.0707065	0.078	0.144	1	BLMH	0.993342
RSL1D1	0.101564	-0.103508	0.417	0.529	1	RSL1D1	0.993262
SF3A2	0.101634	-0.121299	0.113	0.182	1	SF3A2	0.992959
KLHL9	0.10164	0.11615	0.122	0.07	1	KLHL9	0.992934
ARFGAP3	0.101772	-0.0888247	0.174	0.267	1	ARFGAP3	0.992371
MOB2	0.101912	-0.109894	0.217	0.316	1	MOB2	0.991775
LY6E	0.101956	0.133104	0.678	0.599	1	LY6E	0.991587
MIR3142HG	0.101998	-0.131675	0.191	0.278	1	MIR3142HG	0.991408
ERCC6	0.102268	0.0759803	0.104	0.053	1	ERCC6	0.990258
RCC2	0.103011	-0.0785337	0.052	0.107	1	RCC2	0.987115
GNPDA2	0.103095	0.0959682	0.13	0.075	1	GNPDA2	0.986761
LSM7	0.103281	0.137233	0.609	0.561	1	LSM7	0.985981
ZNF3	0.103333	-0.0544339	0.061	0.123	1	ZNF3	0.98576
KMT2C	0.103411	-0.11498	0.2	0.289	1	KMT2C	0.985434
AL359220.1	0.103502	0.125393	0.183	0.118	1	AL359220.1	0.985052
EPSTI1	0.103688	0.144254	0.496	0.422	1	EPSTI1	0.984271
MSL3	0.10378	0.156037	0.348	0.267	1	MSL3	0.983886
KDM5B	0.104272	-0.136223	0.226	0.31	1	KDM5B	0.981832
SP4	0.104372	-0.0963246	0.139	0.219	1	SP4	0.981416
EPHA1-AS1	0.10443	-0.0679716	0.07	0.134	1	EPHA1-AS1	0.981175
FAF2	0.104576	-0.0942248	0.174	0.262	1	FAF2	0.980567
TOMM22	0.104705	0.0957726	0.478	0.401	1	TOMM22	0.980032
NRAS	0.104823	0.0646388	0.104	0.053	1	NRAS	0.979542
SSR4	0.104866	0.0880754	0.904	0.866	1	SSR4	0.979363
CTCF	0.105019	0.157566	0.461	0.396	1	CTCF	0.978733
CLK3	0.105281	0.0774382	0.2	0.128	1	CLK3	0.977649
FTO	0.105359	0.104831	0.13	0.075	1	FTO	0.977328
RPAP2	0.105376	0.110041	0.339	0.241	1	RPAP2	0.977259
RPRD1B	0.105389	0.0516522	0.122	0.064	1	RPRD1B	0.977204
PDIA4	0.105456	0.122954	0.191	0.123	1	PDIA4	0.976928
SLC25A28	0.10578	0.0662813	0.183	0.112	1	SLC25A28	0.975596
PCBD1	0.106037	-0.0768596	0.113	0.187	1	PCBD1	0.974544
MGST2	0.106142	0.143787	0.383	0.316	1	MGST2	0.974112
ZNF254	0.106506	0.101549	0.13	0.075	1	ZNF254	0.972627
PSMD10	0.106595	-0.0800408	0.052	0.107	1	PSMD10	0.972265
MTR	0.106757	-0.0779392	0.096	0.166	1	MTR	0.971604
RABGAP1L	0.10718	-0.0935387	0.391	0.513	1	RABGAP1L	0.969887
LENG1	0.107295	0.104658	0.27	0.193	1	LENG1	0.969421
ZNF302	0.107491	-0.0757698	0.2	0.283	1	ZNF302	0.96863
CHMP7	0.107578	-0.0764156	0.313	0.422	1	CHMP7	0.968278
AC004951.1	0.107662	-0.0839865	0.061	0.118	1	AC004951.1	0.967937
CXCR3	0.107836	-0.135591	0.47	0.572	1	CXCR3	0.967238
SMARCD2	0.108021	-0.131912	0.139	0.209	1	SMARCD2	0.966493
LRBA	0.108022	-0.0879329	0.27	0.374	1	LRBA	0.966487
SLC1A5	0.108066	-0.0655798	0.087	0.155	1	SLC1A5	0.966311
TMEM14C	0.108596	-0.08341	0.27	0.39	1	TMEM14C	0.964188
KIAA1191	0.108674	0.114978	0.139	0.086	1	KIAA1191	0.963875
ASCC3	0.108797	-0.140268	0.235	0.316	1	ASCC3	0.963384
CCDC84	0.10883	0.113991	0.2	0.134	1	CCDC84	0.96325
LYRM2	0.108977	0.122326	0.287	0.214	1	LYRM2	0.962666
SLC3A2	0.10906	0.138709	0.504	0.46	1	SLC3A2	0.962334
RPA3	0.109314	0.161286	0.426	0.364	1	RPA3	0.961324
ZMPSTE24	0.109415	-0.0724649	0.061	0.118	1	ZMPSTE24	0.960922
SCRN2	0.109416	0.0642107	0.104	0.053	1	SCRN2	0.960919
SLAMF1	0.109574	0.0999204	0.365	0.278	1	SLAMF1	0.960292
PELI1	0.109597	0.0943146	0.139	0.08	1	PELI1	0.960202
FKBP8	0.109605	-0.152542	0.513	0.604	1	FKBP8	0.960168
BAX	0.109662	0.144698	0.757	0.738	1	BAX	0.959946
TXK	0.110086	0.184824	0.339	0.262	1	TXK	0.958266
IER3	0.110276	-0.0774086	0.052	0.107	1	IER3	0.957519
GBP4	0.110378	0.215825	0.496	0.439	1	GBP4	0.957119
SMARCD1	0.110388	0.131201	0.191	0.128	1	SMARCD1	0.957079
TRIP11	0.110816	-0.0819495	0.313	0.417	1	TRIP11	0.955398
RAPGEF6	0.110899	-0.0734252	0.052	0.107	1	RAPGEF6	0.955072
SCYL2	0.111142	0.105128	0.122	0.07	1	SCYL2	0.954122
UBA2	0.111497	0.0957618	0.452	0.364	1	UBA2	0.952738
RABGAP1	0.111627	0.122095	0.174	0.112	1	RABGAP1	0.952232
CNP	0.111727	0.087768	0.191	0.123	1	CNP	0.951843
MANF	0.111995	-0.125003	0.278	0.374	1	MANF	0.950803
HNRNPDL	0.11223	-0.0709938	0.635	0.717	1	HNRNPDL	0.94989
ZNF444	0.112377	0.101273	0.122	0.07	1	ZNF444	0.949321
SPCS3	0.112403	-0.154339	0.478	0.572	1	SPCS3	0.949223
UBE2D1	0.112515	0.134325	0.217	0.16	1	UBE2D1	0.948788
RFTN1	0.112778	0.192573	0.322	0.251	1	RFTN1	0.947775
SRGN	0.112783	0.101471	0.983	0.936	1	SRGN	0.947755
TTC17	0.112817	-0.117398	0.174	0.257	1	TTC17	0.947624
SSU72	0.112886	0.0949299	0.696	0.642	1	SSU72	0.947359
SDF2	0.112889	0.145833	0.435	0.39	1	SDF2	0.947349
GLOD4	0.113005	-0.129075	0.296	0.385	1	GLOD4	0.946901
AES	0.113107	-0.103642	0.965	0.984	1	AES	0.946509
EZH2	0.113369	-0.101794	0.061	0.112	1	EZH2	0.945504
RNF5	0.113418	-0.119362	0.165	0.241	1	RNF5	0.94532
HEXB	0.113523	-0.0721147	0.13	0.209	1	HEXB	0.944918
SNF8	0.113587	0.120751	0.461	0.385	1	SNF8	0.94467
EBNA1BP2	0.113987	-0.0687194	0.13	0.209	1	EBNA1BP2	0.943146
MED19	0.114041	-0.0775384	0.139	0.219	1	MED19	0.942938
DYRK1A	0.114173	-0.0982003	0.122	0.193	1	DYRK1A	0.942436
ECHDC1	0.114217	0.151069	0.296	0.235	1	ECHDC1	0.942269
CIAO1	0.114676	0.132309	0.261	0.193	1	CIAO1	0.940528
VTI1B	0.114678	-0.142426	0.217	0.299	1	VTI1B	0.94052
AL133453.1	0.114879	-0.0763049	0.191	0.289	1	AL133453.1	0.939758
DNAJC15	0.115251	0.0960324	0.487	0.417	1	DNAJC15	0.938354
FIS1	0.115369	-0.119028	0.478	0.583	1	FIS1	0.937912
ABTB1	0.115461	-0.113106	0.191	0.278	1	ABTB1	0.937564
PCMTD1	0.115648	-0.11064	0.33	0.444	1	PCMTD1	0.936861
KATNBL1	0.115759	-0.0830945	0.165	0.251	1	KATNBL1	0.936446
IFT27	0.116038	-0.0761869	0.061	0.118	1	IFT27	0.935401
INO80D	0.116551	-0.0342278	0.165	0.257	1	INO80D	0.933485
CNOT7	0.116623	-0.149274	0.313	0.406	1	CNOT7	0.933217
ADAM17	0.116737	0.113557	0.139	0.086	1	ADAM17	0.932792
MESD	0.116843	0.103802	0.574	0.497	1	MESD	0.932399
MPI	0.11701	-0.0918347	0.078	0.139	1	MPI	0.931776
PGS1	0.117125	-0.0984442	0.104	0.171	1	PGS1	0.931351
SREK1IP1	0.117228	-0.0887506	0.2	0.289	1	SREK1IP1	0.930968
SAMD4B	0.117562	-0.0859238	0.087	0.15	1	SAMD4B	0.929732
HINT1	0.117654	-0.0726068	0.974	0.984	1	HINT1	0.929394
C20orf27	0.117736	-0.0940536	0.061	0.112	1	C20orf27	0.929091
CCDC88C	0.117984	0.0774905	0.47	0.38	1	CCDC88C	0.928177
RPL10	0.118293	-0.0568524	1	1	1	RPL10	0.927041
ERI1	0.118353	0.134676	0.191	0.128	1	ERI1	0.926821
ZNF431	0.118452	-0.105994	0.165	0.246	1	ZNF431	0.926459
MEF2D	0.118561	-0.0932773	0.122	0.193	1	MEF2D	0.926058
RPS17	0.118707	-0.116262	0.157	0.241	1	RPS17	0.925525
CMPK1	0.119035	-0.134114	0.461	0.567	1	CMPK1	0.924324
NFATC2	0.119339	-0.0951071	0.13	0.198	1	NFATC2	0.923216
FCHSD2	0.119367	0.0942683	0.122	0.07	1	FCHSD2	0.923115
PIM1	0.119637	-0.066553	0.661	0.807	1	PIM1	0.922135
ADAM10	0.119909	-0.073226	0.261	0.358	1	ADAM10	0.92115
YTHDF1	0.120076	-0.080249	0.096	0.16	1	YTHDF1	0.920545
FOXN2	0.120259	-0.08437	0.104	0.171	1	FOXN2	0.919882
CCAR1	0.120832	-0.0691901	0.235	0.337	1	CCAR1	0.917817
SNAPC1	0.120889	-0.117316	0.07	0.123	1	SNAPC1	0.917615
RNF41	0.120891	-0.0773826	0.104	0.176	1	RNF41	0.917607
TPP1	0.120906	-0.144062	0.322	0.406	1	TPP1	0.917551
NAA15	0.120995	-0.094741	0.13	0.203	1	NAA15	0.917232
PLEKHA1	0.121159	0.143773	0.296	0.225	1	PLEKHA1	0.916645
MRPS18B	0.121218	-0.0833199	0.2	0.289	1	MRPS18B	0.916432
RNF146	0.121233	0.0542658	0.104	0.053	1	RNF146	0.916381
PLEKHO1	0.121246	-0.121672	0.374	0.465	1	PLEKHO1	0.916332
PPIA	0.121256	0.0738029	0.93	0.909	1	PPIA	0.916298
COPZ1	0.121261	0.170955	0.435	0.39	1	COPZ1	0.916278
ZNF408	0.121551	-0.0728099	0.07	0.128	1	ZNF408	0.915242
RAN	0.121601	-0.0990215	0.852	0.856	1	RAN	0.915063
SUPT20H	0.121719	-0.107215	0.191	0.283	1	SUPT20H	0.91464
EIF2S2	0.121792	-0.118816	0.53	0.615	1	EIF2S2	0.914382
MT-ND6	0.1222	-0.109546	0.774	0.877	1	MT-ND6	0.912928
EIF5A	0.122216	-0.0903108	0.557	0.658	1	EIF5A	0.912873
FARS2	0.122232	-0.0733852	0.078	0.139	1	FARS2	0.912816
EID2	0.122615	-0.0632145	0.087	0.15	1	EID2	0.911456
DCUN1D5	0.122706	0.0704566	0.235	0.16	1	DCUN1D5	0.911133
ETNK1	0.123368	-0.149695	0.226	0.289	1	ETNK1	0.908798
NSMCE4A	0.123385	0.0923376	0.322	0.246	1	NSMCE4A	0.908737
ZNF121	0.124016	-0.073652	0.07	0.128	1	ZNF121	0.906524
S1PR4	0.124024	-0.0757056	0.87	0.936	1	S1PR4	0.906494
CTSZ	0.124325	-0.106547	0.27	0.364	1	CTSZ	0.90544
CKLF	0.124439	0.147019	0.809	0.77	1	CKLF	0.905045
C3orf38	0.12454	-0.109638	0.104	0.171	1	C3orf38	0.904691
ZBTB24	0.124701	0.202138	0.409	0.358	1	ZBTB24	0.904129
GABPB1-AS1	0.124808	-0.153589	0.452	0.529	1	GABPB1-AS1	0.903757
ATP5MC2	0.124811	-0.0937028	0.87	0.882	1	ATP5MC2	0.903748
BRD7	0.125269	0.132191	0.461	0.417	1	BRD7	0.902157
RAB6A	0.125353	-0.106019	0.165	0.241	1	RAB6A	0.901865
ZNF326	0.125629	-0.0795731	0.104	0.171	1	ZNF326	0.900912
CEP44	0.125889	0.0983206	0.139	0.086	1	CEP44	0.900011
UCHL3	0.125895	0.120645	0.209	0.144	1	UCHL3	0.899991
OPTN	0.12595	0.131463	0.817	0.765	1	OPTN	0.899802
MT-ND5	0.125995	-0.121049	0.991	1	1	MT-ND5	0.899646
LNPK	0.126015	-0.0326452	0.052	0.107	1	LNPK	0.899578
WWC3	0.126226	-0.0825619	0.07	0.123	1	WWC3	0.898851
LGALS9	0.126363	-0.040214	0.139	0.219	1	LGALS9	0.898382
ATP6V0A2	0.126863	-0.0852145	0.061	0.112	1	ATP6V0A2	0.896664
ZNF394	0.127016	-0.0845214	0.235	0.321	1	ZNF394	0.896141
JAKMIP1	0.127244	-0.0671839	0.209	0.299	1	JAKMIP1	0.895361
AP2A2	0.127263	0.107044	0.157	0.102	1	AP2A2	0.895299
CEP68	0.127275	-0.0599944	0.104	0.171	1	CEP68	0.895256
PRPS1	0.127488	0.104594	0.243	0.171	1	PRPS1	0.894532
DNAJB9	0.127731	-0.0850494	0.148	0.23	1	DNAJB9	0.893704
MAN1A2	0.127756	0.0684801	0.417	0.337	1	MAN1A2	0.893618
NDUFA3	0.127804	0.10496	0.487	0.417	1	NDUFA3	0.893456
HIST1H2AC	0.127869	0.0912824	0.104	0.059	1	HIST1H2AC	0.893234
PSMB8-AS1	0.128293	0.137578	0.522	0.455	1	PSMB8-AS1	0.891797
CSKMT	0.128302	0.100945	0.148	0.091	1	CSKMT	0.891767
MRM2	0.128417	0.142632	0.183	0.128	1	MRM2	0.891378
PMM2	0.128683	0.0732498	0.113	0.064	1	PMM2	0.890479
YIPF6	0.128785	-0.0984745	0.122	0.193	1	YIPF6	0.890136
GRWD1	0.128924	0.0820697	0.148	0.091	1	GRWD1	0.889667
RPSA	0.129217	-0.06163	1	1	1	RPSA	0.888679
ZRANB1	0.129399	-0.0659813	0.052	0.102	1	ZRANB1	0.888069
ZDHHC13	0.129399	-0.073673	0.052	0.102	1	ZDHHC13	0.888069
PYROXD1	0.129403	0.124169	0.226	0.16	1	PYROXD1	0.888057
ARF1	0.129585	0.121123	0.687	0.695	1	ARF1	0.887445
NANS	0.129603	-0.106369	0.191	0.267	1	NANS	0.887386
COX17	0.129719	-0.0121099	0.357	0.492	1	COX17	0.886997
IDH3A	0.129777	-0.101881	0.07	0.123	1	IDH3A	0.886804
YME1L1	0.130002	0.153461	0.322	0.267	1	YME1L1	0.886049
ST8SIA4	0.130176	-0.0740751	0.157	0.241	1	ST8SIA4	0.88547
CAB39	0.130344	0.153482	0.409	0.358	1	CAB39	0.884908
TUT4	0.130388	-0.124235	0.383	0.487	1	TUT4	0.884762
UTP23	0.130589	0.0947843	0.2	0.134	1	UTP23	0.884095
RBM15B	0.130671	0.106177	0.165	0.107	1	RBM15B	0.883822
ATP5MPL	0.131102	0.130223	0.643	0.615	1	ATP5MPL	0.882392
RPS11	0.131285	-0.068518	0.991	1	1	RPS11	0.881784
BDP1	0.131348	-0.117403	0.287	0.385	1	BDP1	0.881575
SC5D	0.131435	0.112108	0.148	0.091	1	SC5D	0.881289
SLC38A2	0.131686	-0.176223	0.165	0.23	1	SLC38A2	0.880462
DCUN1D1	0.132073	-0.119131	0.13	0.198	1	DCUN1D1	0.879187
SAFB2	0.132336	0.092089	0.383	0.316	1	SAFB2	0.878323
HMGXB3	0.132459	0.0947488	0.165	0.107	1	HMGXB3	0.877918
ZCCHC8	0.132519	-0.0913688	0.096	0.155	1	ZCCHC8	0.877723
DAP3	0.13255	-0.0977123	0.322	0.406	1	DAP3	0.877621
GRIPAP1	0.133104	-0.111334	0.2	0.278	1	GRIPAP1	0.875809
PPP3R1	0.133219	-0.0469798	0.078	0.139	1	PPP3R1	0.875432
CXorf38	0.133236	-0.113752	0.217	0.294	1	CXorf38	0.875378
CARS	0.133518	0.10314	0.261	0.198	1	CARS	0.874459
C19orf70	0.133551	-0.124154	0.417	0.524	1	C19orf70	0.874352
POLD2	0.133652	0.0779495	0.122	0.07	1	POLD2	0.874024
H3F3B	0.133729	0.0863107	1	0.973	1	H3F3B	0.873773
HS3ST3B1	0.134445	-0.0853097	0.139	0.219	1	HS3ST3B1	0.871454
TOP3A	0.134498	-0.0750297	0.052	0.102	1	TOP3A	0.871284
SLMAP	0.134559	-0.0801237	0.13	0.203	1	SLMAP	0.871087
CA11	0.134868	-0.0670891	0.052	0.102	1	CA11	0.870091
GATA3	0.134869	0.113427	0.443	0.364	1	GATA3	0.870087
MGAT4A	0.134873	0.0929591	0.165	0.107	1	MGAT4A	0.870076
ACTR10	0.134954	0.103786	0.313	0.241	1	ACTR10	0.869816
NAA35	0.13501	-0.042513	0.061	0.118	1	NAA35	0.869636
ATP5PO	0.135046	-0.0983346	0.6	0.738	1	ATP5PO	0.869519
RPL18	0.135143	-0.0361823	1	0.995	1	RPL18	0.869207
CLP1	0.135239	-0.0719971	0.052	0.102	1	CLP1	0.868898
CHMP5	0.135473	0.140067	0.426	0.374	1	CHMP5	0.868148
PAM	0.135753	-0.0820587	0.07	0.123	1	PAM	0.867251
KLHL36	0.135876	-0.0938105	0.2	0.294	1	KLHL36	0.866858
GNPTAB	0.136184	-0.102247	0.365	0.46	1	GNPTAB	0.865875
HNRNPA2B1	0.136381	0.0623786	0.948	0.979	1	HNRNPA2B1	0.865245
ARF4	0.136442	-0.0945894	0.322	0.428	1	ARF4	0.865051
EPN1	0.136527	0.126967	0.226	0.166	1	EPN1	0.86478
SDHAF1	0.136601	-0.0615868	0.157	0.241	1	SDHAF1	0.864545
STAM	0.13662	0.0747337	0.452	0.38	1	STAM	0.864487
CTNNA1	0.136664	-0.0651104	0.113	0.187	1	CTNNA1	0.864346
CFP	0.13673	-0.0755984	0.052	0.102	1	CFP	0.864135
TBC1D20	0.136737	-0.100724	0.087	0.144	1	TBC1D20	0.864115
NIF3L1	0.136975	0.0810113	0.104	0.059	1	NIF3L1	0.863358
DDX51	0.137245	-0.0627818	0.061	0.112	1	DDX51	0.862505
CHRNB1	0.137245	-0.068627	0.061	0.112	1	CHRNB1	0.862505
BLOC1S6	0.13755	-0.131864	0.2	0.278	1	BLOC1S6	0.86154
C1RL	0.1376	0.0984354	0.139	0.086	1	C1RL	0.861383
HAUS2	0.137756	0.0831372	0.104	0.059	1	HAUS2	0.86089
METTL18	0.137862	-0.0682901	0.096	0.16	1	METTL18	0.860555
GLS	0.137952	0.104095	0.47	0.385	1	GLS	0.860271
NUTM2B-AS1	0.13807	-0.124884	0.304	0.401	1	NUTM2B-AS1	0.859901
SMIM7	0.138078	0.154339	0.435	0.358	1	SMIM7	0.859874
POLR1C	0.138234	-0.0809604	0.052	0.102	1	POLR1C	0.859384
NDUFA6	0.138463	0.155717	0.487	0.439	1	NDUFA6	0.858667
SLC7A6	0.138468	0.0884281	0.174	0.112	1	SLC7A6	0.85865
SAYSD1	0.138469	0.138115	0.226	0.171	1	SAYSD1	0.858648
SUCLA2	0.138526	0.105623	0.235	0.171	1	SUCLA2	0.858468
CAMK2G	0.138886	0.118654	0.191	0.134	1	CAMK2G	0.857341
GTF2F1	0.138915	0.145154	0.261	0.198	1	GTF2F1	0.857251
SP140L	0.139066	-0.145912	0.278	0.364	1	SP140L	0.856778
MKNK2	0.139102	-0.109478	0.391	0.513	1	MKNK2	0.856667
SCFD1	0.139158	0.0930333	0.391	0.305	1	SCFD1	0.856493
PTPN2	0.139322	0.147008	0.365	0.305	1	PTPN2	0.855981
STK11	0.139324	-0.0482454	0.148	0.23	1	STK11	0.855974
SCAMP1	0.139328	0.0947277	0.104	0.059	1	SCAMP1	0.855962
SLC30A6	0.139328	0.0765036	0.104	0.059	1	SLC30A6	0.855962
ANP32A	0.139342	-0.0768775	0.53	0.615	1	ANP32A	0.855918
C11orf49	0.139869	-0.0679425	0.104	0.171	1	C11orf49	0.854278
RAD23B	0.140022	-0.124491	0.217	0.299	1	RAD23B	0.853803
PLEKHJ1	0.140088	-0.104093	0.243	0.326	1	PLEKHJ1	0.853601
JMJD6	0.140318	0.119259	0.235	0.166	1	JMJD6	0.852887
CD82	0.140344	0.132703	0.287	0.214	1	CD82	0.852807
EVA1B	0.140594	-0.165938	0.322	0.401	1	EVA1B	0.852034
SLC25A6	0.140669	-0.120834	0.904	0.952	1	SLC25A6	0.851802
C6orf47	0.140761	0.0686545	0.183	0.123	1	C6orf47	0.851516
TBPL1	0.140808	-0.0834839	0.122	0.193	1	TBPL1	0.851374
PPTC7	0.140847	-0.0859062	0.061	0.112	1	PPTC7	0.851253
GALM	0.141196	0.127684	0.296	0.241	1	GALM	0.850177
FAM107B	0.141201	-0.117934	0.73	0.802	1	FAM107B	0.850162
TNKS	0.141281	-0.0718852	0.052	0.102	1	TNKS	0.849917
TCHP	0.141316	0.129967	0.209	0.15	1	TCHP	0.849808
MRPL1	0.141416	-0.0918044	0.174	0.246	1	MRPL1	0.849501
DPP4	0.141712	0.0769823	0.104	0.059	1	DPP4	0.848594
CBWD5	0.141721	0.0953921	0.13	0.08	1	CBWD5	0.848567
MRPL22	0.142067	0.150114	0.313	0.257	1	MRPL22	0.847507
RIT1	0.142159	-0.0613473	0.087	0.144	1	RIT1	0.847226
TACC1	0.142629	0.104845	0.435	0.38	1	TACC1	0.845791
AAMDC	0.14268	0.118911	0.139	0.091	1	AAMDC	0.845636
ABCE1	0.142869	0.0990623	0.365	0.283	1	ABCE1	0.845061
CLIC3	0.143043	-0.0532701	0.061	0.112	1	CLIC3	0.844534
PNRC2	0.143194	-0.0704033	0.322	0.433	1	PNRC2	0.844076
LZIC	0.143205	-0.0973709	0.104	0.166	1	LZIC	0.844041
CLEC2B	0.143217	0.16852	0.496	0.444	1	CLEC2B	0.844007
CD7	0.143427	0.0815792	0.835	0.77	1	CD7	0.84337
SRPRB	0.143481	0.142076	0.2	0.139	1	SRPRB	0.843206
SH3BGRL3	0.143491	-0.0721073	1	1	1	SH3BGRL3	0.843174
RHOC	0.143554	0.136197	0.296	0.225	1	RHOC	0.842985
MT2A	0.14377	0.154631	0.513	0.417	1	MT2A	0.842332
THOC5	0.143781	-0.0734804	0.061	0.112	1	THOC5	0.8423
SNW1	0.143888	-0.108006	0.417	0.497	1	SNW1	0.841975
ANKRD13D	0.144	-0.120531	0.313	0.406	1	ANKRD13D	0.841637
ARL4C	0.144037	-0.0781276	0.939	0.973	1	ARL4C	0.841527
CCDC7	0.144049	-0.0727799	0.07	0.123	1	CCDC7	0.841489
PEX19	0.144159	-0.0834856	0.096	0.155	1	PEX19	0.841157
POLR2C	0.14416	-0.108928	0.235	0.316	1	POLR2C	0.841156
APOL2	0.144306	0.117298	0.287	0.219	1	APOL2	0.840716
CMTR2	0.14437	0.0929637	0.191	0.128	1	CMTR2	0.840522
GGNBP2	0.144422	0.130765	0.443	0.385	1	GGNBP2	0.840367
HMGCL	0.144758	-0.0719346	0.07	0.123	1	HMGCL	0.839358
GMDS	0.144939	0.0776882	0.104	0.059	1	GMDS	0.838815
H6PD	0.144939	0.0775842	0.104	0.059	1	H6PD	0.838815
ELMO1	0.145098	0.165356	0.2	0.144	1	ELMO1	0.838338
PUS7L	0.145147	-0.0706351	0.209	0.299	1	PUS7L	0.838193
HERC6	0.145187	0.138899	0.157	0.107	1	HERC6	0.838072
DPM1	0.145226	0.106018	0.217	0.155	1	DPM1	0.837955
BICD2	0.145265	-0.0575674	0.061	0.112	1	BICD2	0.837839
ZFYVE28	0.145281	-0.0703998	0.139	0.214	1	ZFYVE28	0.837791
TIGAR	0.145348	0.114635	0.174	0.118	1	TIGAR	0.83759
NOSIP	0.145624	-0.07479	0.27	0.385	1	NOSIP	0.836768
CCDC18	0.145638	0.0934393	0.122	0.075	1	CCDC18	0.836726
GIGYF2	0.145821	-0.102451	0.226	0.305	1	GIGYF2	0.83618
NUP160	0.145901	-0.0675884	0.104	0.171	1	NUP160	0.835941
CBL	0.145901	-0.0701393	0.104	0.171	1	CBL	0.835941
PSMA3	0.145988	0.115233	0.635	0.567	1	PSMA3	0.835682
MYL6B	0.146025	-0.0851056	0.174	0.251	1	MYL6B	0.835574
DPYD	0.146112	-0.0582038	0.139	0.214	1	DPYD	0.835313
LRR1	0.146141	0.107701	0.113	0.07	1	LRR1	0.835228
SFT2D3	0.146385	-0.114619	0.07	0.118	1	SFT2D3	0.834503
MRPS25	0.14639	-0.0675858	0.139	0.214	1	MRPS25	0.834487
CCNB1IP1	0.146492	-0.0726538	0.087	0.15	1	CCNB1IP1	0.834185
PDCL	0.146543	-0.0798001	0.174	0.251	1	PDCL	0.834035
SRSF10	0.147013	-0.121964	0.461	0.529	1	SRSF10	0.832646
UTS2	0.147137	0.138326	0.122	0.075	1	UTS2	0.832278
AMZ2	0.147148	0.12859	0.157	0.107	1	AMZ2	0.832245
KIAA1109	0.147331	-0.139532	0.217	0.294	1	KIAA1109	0.831707
ZPR1	0.147377	-0.0781602	0.139	0.209	1	ZPR1	0.83157
NFRKB	0.147528	-0.0578871	0.052	0.102	1	NFRKB	0.831127
TMEM168	0.147619	-0.0691545	0.07	0.123	1	TMEM168	0.830859
MAPKAPK2	0.147771	-0.157275	0.165	0.225	1	MAPKAPK2	0.83041
PEPD	0.148122	-0.138471	0.235	0.321	1	PEPD	0.82938
SINHCAF	0.148207	-0.075388	0.209	0.294	1	SINHCAF	0.82913
POP7	0.148289	0.0957637	0.287	0.214	1	POP7	0.82889
MRPS12	0.148475	-0.0884913	0.409	0.513	1	MRPS12	0.828346
NDUFB6	0.148532	-0.0824654	0.278	0.369	1	NDUFB6	0.828179
TMEM80	0.148577	-0.0975647	0.07	0.118	1	TMEM80	0.828047
HMGN3	0.148831	-0.0782913	0.313	0.422	1	HMGN3	0.827308
TAF10	0.149198	-0.0874228	0.557	0.647	1	TAF10	0.826237
RANGAP1	0.149206	0.0861549	0.191	0.128	1	RANGAP1	0.826214
GALNT11	0.149417	0.0682459	0.165	0.107	1	GALNT11	0.825601
MOB4	0.149421	-0.127265	0.226	0.316	1	MOB4	0.825588
RTCB	0.149443	0.177915	0.365	0.316	1	RTCB	0.825525
NDUFC1	0.149492	0.123119	0.539	0.476	1	NDUFC1	0.825381
ROCK1	0.149538	0.14171	0.661	0.62	1	ROCK1	0.825249
CSNK1A1	0.149574	0.0948663	0.661	0.636	1	CSNK1A1	0.825144
TCTEX1D2	0.149683	0.097209	0.13	0.08	1	TCTEX1D2	0.824828
CASP1	0.149746	0.134131	0.504	0.46	1	CASP1	0.824645
RNASEL	0.149792	-0.0755419	0.07	0.123	1	RNASEL	0.82451
LONP2	0.149939	0.132049	0.296	0.241	1	LONP2	0.824086
PFN1	0.150489	-0.0690117	1	0.995	1	PFN1	0.822496
FDPS	0.150649	-0.122507	0.365	0.449	1	FDPS	0.822034
PTPN9	0.150729	-0.0508606	0.052	0.102	1	PTPN9	0.821803
F8A1	0.150729	-0.0517198	0.052	0.102	1	F8A1	0.821803
ZC3H14	0.150742	-0.0854958	0.113	0.176	1	ZC3H14	0.821766
PTP4A1	0.151305	-0.12317	0.113	0.171	1	PTP4A1	0.820146
RMND1	0.151492	-0.0404438	0.078	0.134	1	RMND1	0.81961
EMC3	0.151597	0.119119	0.357	0.294	1	EMC3	0.819311
WDR7	0.151705	0.0867576	0.122	0.075	1	WDR7	0.819001
ANGPT2	0.151705	0.0726437	0.122	0.075	1	ANGPT2	0.819001
CMAS	0.151849	-0.122787	0.2	0.262	1	CMAS	0.818588
CRIP1	0.151882	-0.136229	0.235	0.305	1	CRIP1	0.818493
MAF	0.151928	0.159631	0.67	0.604	1	MAF	0.818362
MFN1	0.151991	-0.0728306	0.07	0.123	1	MFN1	0.818183
PDHB	0.152074	0.096252	0.357	0.283	1	PDHB	0.817944
MAPKAPK5-AS1	0.152288	-0.122515	0.27	0.332	1	MAPKAPK5-AS1	0.817335
MAP3K4	0.15229	0.0696452	0.191	0.128	1	MAP3K4	0.817329
TARSL2	0.152405	0.0741697	0.104	0.059	1	TARSL2	0.817
EIF3L	0.153503	-0.149009	0.6	0.626	1	EIF3L	0.813884
TRIM21	0.153577	-0.0805038	0.122	0.187	1	TRIM21	0.813674
NEAT1	0.153782	-0.12504	0.965	0.968	1	NEAT1	0.813093
CREB3	0.153929	0.119848	0.139	0.091	1	CREB3	0.812679
SARS	0.154162	0.147444	0.339	0.283	1	SARS	0.812022
SLC30A5	0.154193	-0.090839	0.104	0.166	1	SLC30A5	0.811934
ISCA1	0.154438	0.128442	0.348	0.283	1	ISCA1	0.811245
ARID5B	0.154554	0.148526	0.739	0.722	1	ARID5B	0.810919
RPS18	0.154574	-0.0639843	0.991	1	1	RPS18	0.810862
BZW2	0.154678	-0.0457684	0.104	0.171	1	BZW2	0.81057
OGT	0.154685	0.127225	0.452	0.369	1	OGT	0.810551
DNAJB1	0.155227	-0.0864556	0.148	0.219	1	DNAJB1	0.809033
EIF5	0.155318	0.0904302	0.67	0.615	1	EIF5	0.808778
CYB5R1	0.155709	-0.0521785	0.07	0.123	1	CYB5R1	0.807687
FOXK2	0.15577	-0.0776402	0.078	0.134	1	FOXK2	0.807517
TAF9B	0.155816	0.0602018	0.104	0.059	1	TAF9B	0.807388
LINS1	0.155993	0.102075	0.304	0.235	1	LINS1	0.806895
PJA2	0.15619	-0.103011	0.417	0.497	1	PJA2	0.806348
KLHL6	0.156278	-0.0552494	0.096	0.16	1	KLHL6	0.806101
PSMB10	0.156292	0.12235	0.339	0.278	1	PSMB10	0.806063
TSEN15	0.156363	0.0993932	0.183	0.128	1	TSEN15	0.805866
PLEKHM1	0.156447	0.0802721	0.13	0.08	1	PLEKHM1	0.805631
ARPC3	0.156549	0.074409	0.991	0.979	1	ARPC3	0.805351
ZNF350	0.156716	0.0638345	0.139	0.086	1	ZNF350	0.804886
ZDHHC5	0.156958	0.0770999	0.157	0.102	1	ZDHHC5	0.804217
ZDBF2	0.157004	0.127363	0.183	0.128	1	ZDBF2	0.804089
KPNA3	0.157081	-0.107364	0.139	0.203	1	KPNA3	0.803875
ZNF148	0.157143	-0.0693029	0.226	0.299	1	ZNF148	0.803704
MRPL11	0.157334	0.122221	0.348	0.294	1	MRPL11	0.803178
NNT	0.157961	-0.0846506	0.13	0.193	1	NNT	0.801449
EI24	0.15856	-0.0566679	0.104	0.171	1	EI24	0.799805
ZNF146	0.15883	-0.0749522	0.13	0.198	1	ZNF146	0.799068
KNOP1	0.159747	0.105498	0.209	0.15	1	KNOP1	0.796568
TMEM250	0.160058	0.0654852	0.243	0.176	1	TMEM250	0.795723
PLGRKT	0.160084	-0.0943287	0.226	0.316	1	PLGRKT	0.795653
KAT6A	0.160116	-0.156423	0.322	0.401	1	KAT6A	0.795565
TCEAL4	0.160338	-0.0429434	0.226	0.316	1	TCEAL4	0.794963
CHMP6	0.161022	-0.0787017	0.122	0.187	1	CHMP6	0.793114
MTREX	0.161045	-0.114442	0.13	0.193	1	MTREX	0.793052
BTG1	0.161163	0.0835896	0.983	0.979	1	BTG1	0.792735
USP24	0.161611	0.0745037	0.165	0.107	1	USP24	0.791529
KDSR	0.16174	0.122449	0.313	0.251	1	KDSR	0.791181
CLNS1A	0.161876	0.140435	0.574	0.497	1	CLNS1A	0.790817
SDHA	0.161916	-0.104916	0.374	0.481	1	SDHA	0.79071
ABI1	0.162422	-0.116379	0.313	0.374	1	ABI1	0.789356
RAP2A	0.16294	0.0917788	0.174	0.118	1	RAP2A	0.787973
PDCD11	0.163047	-0.0853668	0.07	0.118	1	PDCD11	0.787687
AC104532.2	0.163287	0.118077	0.148	0.096	1	AC104532.2	0.787047
TSPAN32	0.163837	-0.127038	0.07	0.118	1	TSPAN32	0.785588
GATAD2A	0.16394	0.186709	0.278	0.23	1	GATAD2A	0.785315
SOCS1	0.164	-0.0397084	0.539	0.652	1	SOCS1	0.785156
PERP	0.164004	-0.0493078	0.061	0.112	1	PERP	0.785145
SLA2	0.164204	-0.0685181	0.122	0.187	1	SLA2	0.784617
PITPNM1	0.164413	0.0722972	0.122	0.075	1	PITPNM1	0.784064
WDR13	0.164782	-0.0589687	0.087	0.144	1	WDR13	0.78309
SCO1	0.164806	-0.0625213	0.13	0.193	1	SCO1	0.783026
NTMT1	0.164896	0.125338	0.287	0.23	1	NTMT1	0.782791
HNRNPH2	0.165248	-0.108293	0.243	0.316	1	HNRNPH2	0.781864
CEP57	0.165285	-0.100333	0.261	0.337	1	CEP57	0.781768
ZNF655	0.165288	-0.110247	0.252	0.337	1	ZNF655	0.781759
PPP1R21	0.165352	-0.0566537	0.078	0.134	1	PPP1R21	0.781592
OSGIN2	0.165644	-0.0492239	0.061	0.112	1	OSGIN2	0.780823
MED15	0.166361	0.0847108	0.296	0.23	1	MED15	0.778948
LBH	0.166681	-0.108183	0.591	0.674	1	LBH	0.778114
BLVRA	0.166862	0.0905752	0.183	0.128	1	BLVRA	0.777643
MED6	0.166986	0.148025	0.252	0.193	1	MED6	0.77732
ZNRD1	0.167123	-0.0807738	0.365	0.46	1	ZNRD1	0.776963
GTF3A	0.167165	0.102511	0.817	0.781	1	GTF3A	0.776854
IL4R	0.16733	-0.0857037	0.235	0.31	1	IL4R	0.776427
SRI	0.167366	-0.0751204	0.53	0.647	1	SRI	0.776332
UBE2L3	0.167554	0.0932894	0.643	0.535	1	UBE2L3	0.775845
PHPT1	0.167668	0.11465	0.617	0.567	1	PHPT1	0.77555
SPTAN1	0.167782	0.0883247	0.504	0.428	1	SPTAN1	0.775253
PHYKPL	0.167803	-0.0804689	0.252	0.326	1	PHYKPL	0.775199
DGCR2	0.167831	-0.0693729	0.061	0.107	1	DGCR2	0.775129
PPP1R10	0.168468	0.0861322	0.487	0.439	1	PPP1R10	0.773483
WDR26	0.168594	-0.0935343	0.165	0.23	1	WDR26	0.773158
GEMIN7	0.168962	-0.0298001	0.061	0.112	1	GEMIN7	0.772211
SPG21	0.168963	-0.100019	0.148	0.214	1	SPG21	0.772209
PSMD3	0.169287	-0.0857917	0.235	0.305	1	PSMD3	0.771377
COX20	0.169368	0.10846	0.357	0.278	1	COX20	0.771168
BFAR	0.169553	-0.113961	0.2	0.273	1	BFAR	0.770694
UBA6	0.169695	-0.0629723	0.183	0.251	1	UBA6	0.77033
SECISBP2	0.169884	-0.143313	0.261	0.337	1	SECISBP2	0.769848
ASCC1	0.169938	0.099013	0.113	0.07	1	ASCC1	0.76971
GLIPR2	0.170017	0.152753	0.296	0.241	1	GLIPR2	0.769508
YWHAB	0.170066	0.0356672	0.991	0.989	1	YWHAB	0.769381
44075	0.170145	-0.137631	0.478	0.567	1	44075	0.769181
SLC35F6	0.170219	0.0760038	0.122	0.075	1	SLC35F6	0.768993
ANKH	0.170509	-0.0594227	0.235	0.31	1	ANKH	0.768252
ZNF524	0.170539	-0.122114	0.2	0.278	1	ZNF524	0.768175
TRABD	0.170594	-0.121801	0.461	0.551	1	TRABD	0.768036
SLC25A3	0.170682	0.0814293	0.913	0.888	1	SLC25A3	0.767812
OSTM1	0.170934	0.114422	0.287	0.23	1	OSTM1	0.767171
SCAF8	0.171147	-0.0790904	0.087	0.139	1	SCAF8	0.766631
UNC13D	0.171344	-0.0985826	0.2	0.267	1	UNC13D	0.766132
CDK11B	0.171499	0.104107	0.209	0.155	1	CDK11B	0.765738
ENOPH1	0.171566	-0.0777679	0.139	0.209	1	ENOPH1	0.765569
MIER1	0.171572	0.0600848	0.496	0.422	1	MIER1	0.765554
ACAA2	0.1716	-0.0482599	0.313	0.417	1	ACAA2	0.765482
DENND4B	0.171603	-0.0580376	0.096	0.15	1	DENND4B	0.765474
NDEL1	0.172097	-0.0707178	0.061	0.107	1	NDEL1	0.764228
RPL26	0.172189	-0.04499	1	1	1	RPL26	0.763995
CDK5RAP3	0.172306	0.100428	0.183	0.128	1	CDK5RAP3	0.7637
METTL26	0.172584	-0.0966508	0.383	0.46	1	METTL26	0.762999
SECISBP2L	0.172654	0.101902	0.165	0.112	1	SECISBP2L	0.762823
PTGES2	0.172676	-0.0662832	0.165	0.241	1	PTGES2	0.762767
PMVK	0.172684	0.139373	0.304	0.251	1	PMVK	0.762748
SMARCA2	0.172685	-0.0597146	0.261	0.358	1	SMARCA2	0.762746
44076	0.172717	0.130701	0.478	0.406	1	44076	0.762665
EIF4A1	0.172825	0.0993902	0.4	0.353	1	EIF4A1	0.762393
PRDX2	0.173036	-0.0804857	0.817	0.856	1	PRDX2	0.761863
PTPRC	0.173043	0.0587588	1	1	1	PTPRC	0.761845
AHCY	0.17313	0.0612247	0.13	0.08	1	AHCY	0.761627
CERS5	0.173415	-0.105352	0.148	0.209	1	CERS5	0.760913
DVL3	0.173436	0.0936367	0.113	0.07	1	DVL3	0.760861
ZNF318	0.173543	-0.0753614	0.07	0.118	1	ZNF318	0.760593
CCDC97	0.173628	-0.0869946	0.078	0.128	1	CCDC97	0.760381
RNMT	0.173808	-0.114906	0.322	0.412	1	RNMT	0.75993
ADH5	0.173877	-0.105555	0.417	0.519	1	ADH5	0.759758
TUSC2	0.173893	-0.0763033	0.174	0.246	1	TUSC2	0.759719
SESN3	0.173981	0.177148	0.391	0.321	1	SESN3	0.759498
GORASP2	0.174096	0.0770153	0.174	0.118	1	GORASP2	0.75921
HPGD	0.174315	0.163448	0.243	0.182	1	HPGD	0.758666
SMARCC2	0.174361	-0.0524543	0.243	0.332	1	SMARCC2	0.758549
VCL	0.174371	-0.0751118	0.07	0.118	1	VCL	0.758526
KEAP1	0.174381	-0.0819759	0.113	0.171	1	KEAP1	0.758501
POLR2B	0.174397	0.180313	0.391	0.337	1	POLR2B	0.758461
KLHL42	0.174459	0.0802317	0.122	0.075	1	KLHL42	0.758308
RAD17	0.174584	-0.0581075	0.078	0.134	1	RAD17	0.757996
TECPR1	0.17468	-0.0329438	0.183	0.257	1	TECPR1	0.757757
MT-ND2	0.174762	-0.0638155	0.991	1	1	MT-ND2	0.757554
FASTKD5	0.174786	0.0640842	0.13	0.08	1	FASTKD5	0.757493
MAD2L2	0.175017	0.0841729	0.148	0.096	1	MAD2L2	0.756919
GRAP2	0.175175	0.133751	0.243	0.187	1	GRAP2	0.756528
NDUFAF4	0.175202	-0.0763269	0.07	0.118	1	NDUFAF4	0.756462
RAP1A	0.175335	-0.050105	0.617	0.733	1	RAP1A	0.756131
RNF213	0.175518	0.1064	0.87	0.861	1	RNF213	0.755679
THAP11	0.175565	-0.0787778	0.243	0.316	1	THAP11	0.755561
GNL1	0.175774	0.132811	0.165	0.118	1	GNL1	0.755044
NSRP1	0.175908	0.159796	0.391	0.337	1	NSRP1	0.754713
TMEM63A	0.175951	0.0895393	0.478	0.449	1	TMEM63A	0.754609
GDI1	0.175963	-0.0427092	0.122	0.193	1	GDI1	0.754578
MXD4	0.176177	-0.111792	0.487	0.556	1	MXD4	0.75405
LATS1	0.176309	-0.0540549	0.096	0.155	1	LATS1	0.753725
JAGN1	0.176323	0.129374	0.322	0.251	1	JAGN1	0.753691
SPEN	0.176369	-0.0487624	0.27	0.369	1	SPEN	0.753577
PPP1CA	0.176405	0.115743	0.774	0.775	1	PPP1CA	0.753489
TBC1D4	0.176405	0.158285	0.557	0.487	1	TBC1D4	0.753489
LYSMD3	0.176488	-0.0892809	0.087	0.139	1	LYSMD3	0.753284
LYPLA2	0.176492	0.127798	0.27	0.225	1	LYPLA2	0.753276
TLE3	0.176726	-0.0703734	0.122	0.187	1	TLE3	0.752699
RNF170	0.176726	-0.072805	0.122	0.187	1	RNF170	0.752699
MLYCD	0.176872	-0.0665429	0.07	0.118	1	MLYCD	0.752341
GYG1	0.176945	0.0803488	0.209	0.15	1	GYG1	0.752163
KDM7A	0.176973	-0.0939853	0.104	0.16	1	KDM7A	0.752094
CD44	0.17719	0.122304	0.826	0.834	1	CD44	0.751561
NDUFAF3	0.177226	0.103606	0.478	0.417	1	NDUFAF3	0.751472
MAP7D3	0.177261	-0.103823	0.087	0.139	1	MAP7D3	0.751386
NUP58	0.177623	-0.0809498	0.078	0.128	1	NUP58	0.750501
GMIP	0.177816	0.137314	0.243	0.193	1	GMIP	0.75003
POLR2G	0.178224	0.0760967	0.348	0.289	1	POLR2G	0.749033
ILKAP	0.178727	-0.112427	0.113	0.166	1	ILKAP	0.74781
TRRAP	0.178809	-0.113275	0.122	0.176	1	TRRAP	0.747612
TUBA1A	0.179052	0.1908	0.452	0.428	1	TUBA1A	0.74702
HSPB1	0.179108	-0.112722	0.2	0.267	1	HSPB1	0.746884
HLA-A	0.179113	0.0662782	1	1	1	HLA-A	0.746873
GZMK	0.179435	0.0455665	0.191	0.128	1	GZMK	0.746093
SEC16A	0.179451	0.0946342	0.2	0.139	1	SEC16A	0.746054
F5	0.179715	-0.0761659	0.183	0.257	1	F5	0.745415
USP42	0.179879	0.115016	0.104	0.064	1	USP42	0.745019
LAP3	0.180001	0.0636218	0.348	0.273	1	LAP3	0.744726
43895	0.180007	-0.0692784	0.113	0.171	1	43895	0.744711
TTC9C	0.180124	0.0967834	0.226	0.171	1	TTC9C	0.744429
FBH1	0.180168	-0.0863744	0.226	0.299	1	FBH1	0.744323
YWHAE	0.180337	0.105998	0.557	0.513	1	YWHAE	0.743914
COX5A	0.180339	-0.0723267	0.67	0.727	1	COX5A	0.743909
AIDA	0.180534	-0.113346	0.252	0.316	1	AIDA	0.743441
ERG28	0.180644	0.113771	0.209	0.16	1	ERG28	0.743176
SNX17	0.180714	-0.127797	0.322	0.406	1	SNX17	0.743009
HLA-DPA1	0.181032	-0.144873	0.739	0.861	1	HLA-DPA1	0.742244
NENF	0.181128	0.135438	0.217	0.166	1	NENF	0.742014
CYB561A3	0.181164	-0.073708	0.087	0.139	1	CYB561A3	0.741927
TFIP11	0.1812	-0.0632323	0.113	0.176	1	TFIP11	0.741842
PTEN	0.181311	-0.100145	0.33	0.428	1	PTEN	0.741577
OSBPL11	0.181503	0.0913201	0.113	0.07	1	OSBPL11	0.741117
ARID4A	0.181657	0.0881382	0.443	0.342	1	ARID4A	0.740749
METTL4	0.181733	0.104822	0.226	0.171	1	METTL4	0.740566
RASSF7	0.181943	-0.0849747	0.148	0.214	1	RASSF7	0.740064
C6orf203	0.181991	0.099101	0.209	0.155	1	C6orf203	0.73995
RGP1	0.182304	0.135136	0.209	0.16	1	RGP1	0.739204
TP53INP1	0.182634	-0.053879	0.13	0.198	1	TP53INP1	0.738417
NCOR1	0.182698	-0.0972089	0.609	0.727	1	NCOR1	0.738267
VPS13C	0.182719	0.128214	0.548	0.492	1	VPS13C	0.738216
ELP5	0.182831	-0.0607639	0.104	0.16	1	ELP5	0.73795
TMEM167A	0.182851	-0.0888812	0.365	0.465	1	TMEM167A	0.737903
TADA3	0.183099	0.154302	0.478	0.406	1	TADA3	0.737315
CXCR6	0.183316	0.2348	0.322	0.278	1	CXCR6	0.736799
HPS5	0.18333	-0.0777441	0.078	0.128	1	HPS5	0.736765
PPP1R12C	0.183331	0.0881518	0.139	0.091	1	PPP1R12C	0.736765
MVD	0.183537	-0.0656679	0.087	0.139	1	MVD	0.736277
VPS25	0.183582	-0.067861	0.096	0.15	1	VPS25	0.73617
SELENOK	0.183692	-0.0674349	0.496	0.652	1	SELENOK	0.73591
VDAC2	0.183998	-0.0707227	0.574	0.658	1	VDAC2	0.735186
R3HDM2	0.184441	0.0530125	0.261	0.187	1	R3HDM2	0.734142
MAP3K11	0.184553	0.0804133	0.165	0.112	1	MAP3K11	0.73388
ST3GAL2	0.184994	-0.0370006	0.122	0.187	1	ST3GAL2	0.732842
EMD	0.185039	0.0800129	0.183	0.128	1	EMD	0.732737
DNAJC4	0.185101	-0.0739692	0.122	0.182	1	DNAJC4	0.73259
IDH3G	0.185349	0.0940011	0.391	0.342	1	IDH3G	0.732009
MYO5A	0.185358	0.136025	0.209	0.15	1	MYO5A	0.731988
MCRS1	0.185358	-0.0733583	0.13	0.198	1	MCRS1	0.731988
C8orf82	0.185396	0.10265	0.13	0.086	1	C8orf82	0.7319
TSPAN14	0.185578	-0.0599331	0.357	0.481	1	TSPAN14	0.731474
ZMYM2	0.185635	0.0728469	0.243	0.176	1	ZMYM2	0.73134
ABCF1	0.185679	-0.073317	0.27	0.38	1	ABCF1	0.731237
TIMM29	0.185814	-0.0719427	0.104	0.16	1	TIMM29	0.730922
PCSK7	0.185888	0.125714	0.722	0.652	1	PCSK7	0.73075
PXMP4	0.186103	0.0802199	0.113	0.07	1	PXMP4	0.730246
SLC26A4-AS1	0.186143	-0.0963842	0.07	0.112	1	SLC26A4-AS1	0.730153
MAP4K5	0.186293	-0.0633718	0.061	0.107	1	MAP4K5	0.729805
AUP1	0.187059	-0.108621	0.27	0.342	1	AUP1	0.728021
SLC25A46	0.187208	-0.0609363	0.061	0.107	1	SLC25A46	0.727676
ERLEC1	0.187283	-0.0433506	0.148	0.219	1	ERLEC1	0.727501
WDR11	0.187296	-0.0723524	0.122	0.176	1	WDR11	0.727471
RNF126	0.187336	-0.0962141	0.322	0.39	1	RNF126	0.727378
RPL9	0.187375	-0.0607034	1	1	1	RPL9	0.727289
CMTM3	0.187635	-0.10253	0.452	0.535	1	CMTM3	0.726686
RNF169	0.187656	0.0785781	0.243	0.187	1	RNF169	0.726637
REEP3	0.187813	0.0532058	0.2	0.139	1	REEP3	0.726275
FBXO6	0.187917	0.101873	0.122	0.08	1	FBXO6	0.726034
PWP1	0.187962	-0.0726953	0.174	0.246	1	PWP1	0.725931
ANKRD27	0.188126	-0.0615677	0.061	0.107	1	ANKRD27	0.725551
RELA	0.188435	-0.0582227	0.226	0.31	1	RELA	0.724839
YBEY	0.188459	-0.0897917	0.139	0.193	1	YBEY	0.724784
PGM2L1	0.188872	-0.0482123	0.148	0.214	1	PGM2L1	0.723833
AKAP9	0.189155	0.0695098	0.652	0.599	1	AKAP9	0.723181
ATP1A1	0.189843	0.0707632	0.409	0.342	1	ATP1A1	0.721606
CEP128	0.190019	-0.0615088	0.078	0.128	1	CEP128	0.721204
FAM193A	0.190665	-0.0414179	0.07	0.118	1	FAM193A	0.719729
PNKP	0.190852	0.137594	0.296	0.241	1	PNKP	0.719303
IFRD1	0.190867	-0.0571172	0.078	0.128	1	IFRD1	0.719269
FBXL4	0.190902	-0.046259	0.061	0.107	1	FBXL4	0.719191
TCOF1	0.190916	-0.0832635	0.113	0.171	1	TCOF1	0.719157
MAT2B	0.191085	0.131026	0.348	0.289	1	MAT2B	0.718774
NBAS	0.191376	-0.0786662	0.096	0.15	1	NBAS	0.718111
GMPS	0.191725	-0.0873404	0.174	0.241	1	GMPS	0.717322
CPQ	0.191737	0.0679779	0.113	0.07	1	CPQ	0.717294
USP33	0.191811	0.0855208	0.304	0.23	1	USP33	0.717127
MRPS10	0.192061	0.105835	0.339	0.267	1	MRPS10	0.716561
ATP5MC1	0.192101	0.0817662	0.443	0.396	1	ATP5MC1	0.716469
TLK1	0.19219	-0.105117	0.478	0.583	1	TLK1	0.716269
ATRAID	0.192299	-0.0853602	0.391	0.503	1	ATRAID	0.716022
ALG8	0.192407	-0.0422575	0.113	0.171	1	ALG8	0.715779
IL6ST	0.192568	0.117627	0.235	0.176	1	IL6ST	0.715415
DENR	0.192581	-0.0715448	0.226	0.316	1	DENR	0.715387
LPXN	0.192619	-0.0937113	0.261	0.337	1	LPXN	0.7153
RBM39	0.193211	0.0873306	0.852	0.743	1	RBM39	0.713968
COX15	0.193212	0.081477	0.13	0.086	1	COX15	0.713965
TRA2B	0.193359	-0.0520041	0.313	0.422	1	TRA2B	0.713635
CTNNBL1	0.193362	-0.112378	0.209	0.273	1	CTNNBL1	0.713628
ZBTB37	0.193389	0.0696748	0.104	0.064	1	ZBTB37	0.713568
ABI2	0.193623	0.0700951	0.235	0.171	1	ABI2	0.713044
BACH1	0.193633	0.103323	0.226	0.171	1	BACH1	0.71302
CUL1	0.193669	-0.0591072	0.2	0.278	1	CUL1	0.712941
TMEM116	0.193762	-0.0792228	0.096	0.15	1	TMEM116	0.712732
PLRG1	0.19381	0.0902988	0.243	0.187	1	PLRG1	0.712625
IFITM2	0.193822	-0.0805264	0.496	0.615	1	IFITM2	0.712598
ZBED1	0.194065	0.0641106	0.209	0.15	1	ZBED1	0.712054
TNFAIP3	0.194201	-0.0943	0.148	0.209	1	TNFAIP3	0.711749
LPCAT4	0.194462	0.100451	0.191	0.139	1	LPCAT4	0.711164
IER5	0.194472	-0.111063	0.348	0.428	1	IER5	0.711142
GALNT2	0.1946	0.0718142	0.113	0.07	1	GALNT2	0.710856
ATP6V1E1	0.194915	0.100436	0.365	0.305	1	ATP6V1E1	0.710154
DDHD1	0.1951	0.199066	0.557	0.529	1	DDHD1	0.709742
SPCS1	0.195148	0.0920077	0.774	0.733	1	SPCS1	0.709637
POLDIP2	0.195451	0.099522	0.165	0.118	1	POLDIP2	0.708961
LSR	0.19546	-0.110969	0.148	0.203	1	LSR	0.708942
RBM22	0.195482	-0.0744677	0.2	0.273	1	RBM22	0.708893
SUPT7L	0.195594	-0.0419471	0.061	0.107	1	SUPT7L	0.708645
LAMTOR1	0.195727	0.102222	0.513	0.455	1	LAMTOR1	0.708349
C1orf43	0.195828	-0.104148	0.409	0.481	1	C1orf43	0.708125
CENPM	0.196017	-0.0792143	0.078	0.128	1	CENPM	0.707707
PRPF8	0.196064	-0.0727198	0.278	0.364	1	PRPF8	0.707603
MINDY2	0.196197	-0.0482748	0.183	0.251	1	MINDY2	0.707308
RFXAP	0.196378	0.0638116	0.104	0.064	1	RFXAP	0.706906
CD48	0.196487	-0.081076	0.817	0.888	1	CD48	0.706666
SP2	0.196542	-0.0478444	0.061	0.107	1	SP2	0.706544
BTG3	0.196999	-0.0838412	0.235	0.31	1	BTG3	0.705536
ENOSF1	0.197494	-0.0362488	0.061	0.107	1	ENOSF1	0.704445
TAF12	0.197629	-0.080048	0.243	0.316	1	TAF12	0.70415
TOLLIP	0.197756	-0.0563477	0.078	0.128	1	TOLLIP	0.703871
FUOM	0.197836	0.116086	0.148	0.102	1	FUOM	0.703695
SNAPIN	0.198258	0.0844137	0.217	0.16	1	SNAPIN	0.702768
NFX1	0.198301	0.0967395	0.174	0.123	1	NFX1	0.702675
BTF3L4	0.198499	-0.108837	0.217	0.283	1	BTF3L4	0.702241
MAN1A1	0.19863	0.0149564	0.078	0.128	1	MAN1A1	0.701956
PAXBP1	0.198652	-0.065983	0.165	0.23	1	PAXBP1	0.701908
ZFX	0.198699	-0.0873576	0.261	0.353	1	ZFX	0.701805
LRCH1	0.198763	-0.0514508	0.07	0.118	1	LRCH1	0.701664
FBXO21	0.198837	-0.0344911	0.113	0.171	1	FBXO21	0.701502
AGPAT2	0.199221	0.0805268	0.183	0.128	1	AGPAT2	0.700666
RFLNB	0.199353	-0.104169	0.27	0.337	1	RFLNB	0.700376
DAXX	0.199545	0.107264	0.252	0.198	1	DAXX	0.69996
MAP2K2	0.1996	-0.0778163	0.47	0.594	1	MAP2K2	0.69984
ZNF576	0.199754	0.0832457	0.122	0.08	1	ZNF576	0.699506
GNB5	0.199856	-0.103678	0.209	0.278	1	GNB5	0.699283
CFDP1	0.200013	-0.0498705	0.287	0.364	1	CFDP1	0.698942
SLC35B1	0.200237	0.0982369	0.209	0.16	1	SLC35B1	0.698455
FAM208A	0.200494	-0.046418	0.2	0.273	1	FAM208A	0.6979
PSMD8	0.20055	0.0904099	0.817	0.791	1	PSMD8	0.697778
ZNF688	0.200555	-0.101369	0.226	0.283	1	ZNF688	0.697766
MRPL20	0.200594	-0.0576151	0.548	0.658	1	MRPL20	0.697681
TCP11L2	0.200952	-0.0521227	0.139	0.203	1	TCP11L2	0.696907
IQGAP1	0.201086	-0.119567	0.574	0.642	1	IQGAP1	0.696618
CCR6	0.201107	-0.0768576	0.191	0.257	1	CCR6	0.696574
HMGB2	0.201366	0.115925	0.687	0.631	1	HMGB2	0.696013
FMR1	0.201521	0.118563	0.217	0.166	1	FMR1	0.69568
AGL	0.202065	-0.0660858	0.104	0.16	1	AGL	0.69451
VTA1	0.202067	0.095433	0.148	0.102	1	VTA1	0.694505
IFITM1	0.202098	-0.0997715	0.122	0.176	1	IFITM1	0.694438
EMILIN2	0.202153	-0.0584798	0.078	0.128	1	EMILIN2	0.694321
GTPBP1	0.202389	0.0704451	0.113	0.07	1	GTPBP1	0.693813
COA6	0.202395	0.0857951	0.33	0.262	1	COA6	0.6938
AL031846.2	0.202561	0.0894106	0.122	0.08	1	AL031846.2	0.693445
ARL8A	0.202577	0.0865863	0.226	0.171	1	ARL8A	0.693409
OGFOD1	0.202694	-0.0547008	0.096	0.15	1	OGFOD1	0.693159
DGCR8	0.202694	-0.0793642	0.113	0.166	1	DGCR8	0.693158
GNG5	0.202909	0.0996185	0.678	0.733	1	GNG5	0.692699
ADPRHL2	0.203004	-0.112581	0.122	0.171	1	ADPRHL2	0.692494
MRGBP	0.20347	-0.0399874	0.113	0.171	1	MRGBP	0.691499
VPS37A	0.203503	-0.0826322	0.07	0.112	1	VPS37A	0.69143
NUP88	0.203521	0.0915761	0.157	0.112	1	NUP88	0.691391
FUCA2	0.203521	0.0902932	0.157	0.112	1	FUCA2	0.691391
KHDRBS1	0.203821	0.0989197	0.635	0.572	1	KHDRBS1	0.690751
CORO1A	0.204493	-0.0500004	0.983	0.984	1	CORO1A	0.689322
ZFYVE19	0.204516	0.0621677	0.104	0.064	1	ZFYVE19	0.689273
TMEM181	0.204553	-0.0584606	0.139	0.203	1	TMEM181	0.689194
NKTR	0.204564	0.0966089	0.661	0.647	1	NKTR	0.689171
DPH7	0.204637	0.0741511	0.148	0.102	1	DPH7	0.689015
RMND5A	0.205104	-0.0695396	0.096	0.144	1	RMND5A	0.688026
FYB1	0.205167	0.0838445	0.783	0.775	1	FYB1	0.687892
ZNF37A	0.205198	0.0753599	0.304	0.246	1	ZNF37A	0.687827
TEX264	0.205218	-0.0920012	0.4	0.492	1	TEX264	0.687784
PPP2R1A	0.205229	-0.0346822	0.165	0.241	1	PPP2R1A	0.687761
PGM2	0.205499	0.0710786	0.148	0.102	1	PGM2	0.68719
ZCCHC9	0.20553	-0.0500206	0.165	0.235	1	ZCCHC9	0.687124
MMD	0.20555	0.0803927	0.104	0.064	1	MMD	0.687083
ATP5MD	0.205726	-0.104439	0.522	0.599	1	ATP5MD	0.68671
TBC1D2B	0.205791	-0.0683	0.148	0.214	1	TBC1D2B	0.686573
MLH3	0.206204	0.0837531	0.174	0.123	1	MLH3	0.685704
UTP18	0.206223	0.118972	0.278	0.23	1	UTP18	0.685663
BRD1	0.20635	-0.0836221	0.157	0.219	1	BRD1	0.685395
FLOT2	0.206456	-0.076561	0.183	0.246	1	FLOT2	0.685173
ZNF43	0.206588	0.0772494	0.104	0.064	1	ZNF43	0.684895
ELOA	0.206916	0.0642163	0.2	0.144	1	ELOA	0.684206
FMNL1	0.207058	-0.0476208	0.548	0.658	1	FMNL1	0.683908
MFSD14B	0.207231	0.0997418	0.148	0.102	1	MFSD14B	0.683545
RUNX1	0.207339	0.143043	0.261	0.203	1	RUNX1	0.683319
STARD7	0.207463	-0.0710391	0.183	0.246	1	STARD7	0.68306
LCOR	0.207592	-0.100747	0.157	0.203	1	LCOR	0.68279
STARD4	0.207702	0.062327	0.13	0.086	1	STARD4	0.68256
YY1AP1	0.208101	0.0647487	0.148	0.102	1	YY1AP1	0.681726
MRPS34	0.208239	-0.089215	0.539	0.647	1	MRPS34	0.681437
SLC16A1	0.208337	0.0884487	0.165	0.118	1	SLC16A1	0.681234
MIEN1	0.208411	-0.107747	0.357	0.433	1	MIEN1	0.68108
CBFA2T2	0.208427	-0.0602582	0.078	0.128	1	CBFA2T2	0.681046
TRIM13	0.208825	0.100688	0.226	0.176	1	TRIM13	0.680217
SULF2	0.208974	0.0727523	0.148	0.102	1	SULF2	0.679909
ESCO1	0.209126	0.0758613	0.322	0.262	1	ESCO1	0.679593
TIMMDC1	0.209161	0.103245	0.235	0.182	1	TIMMDC1	0.679519
ZNF33B	0.2092	-0.0990397	0.13	0.182	1	ZNF33B	0.679439
CAPN15	0.209214	-0.0135949	0.087	0.144	1	CAPN15	0.67941
FOXO3	0.209222	0.110297	0.122	0.08	1	FOXO3	0.679392
ST3GAL5	0.209234	-0.10233	0.122	0.171	1	ST3GAL5	0.679367
PCYT1A	0.209311	-0.02034	0.183	0.262	1	PCYT1A	0.679208
TENT2	0.209535	-0.0586033	0.122	0.182	1	TENT2	0.678744
CPA5	0.209949	-0.0674602	0.13	0.187	1	CPA5	0.677886
RNF103	0.210178	-0.033945	0.061	0.107	1	RNF103	0.677414
IPO9	0.210287	-0.0578377	0.087	0.139	1	IPO9	0.677187
ASNA1	0.210295	-0.118843	0.217	0.289	1	ASNA1	0.677172
MAFG	0.210727	0.0733894	0.148	0.102	1	MAFG	0.676281
ATG2A	0.21082	-0.0761359	0.104	0.155	1	ATG2A	0.676089
RAB3GAP2	0.210846	0.128949	0.252	0.203	1	RAB3GAP2	0.676034
KCTD7	0.211155	0.0854228	0.122	0.08	1	KCTD7	0.675399
ZNF675	0.211235	0.106432	0.165	0.118	1	ZNF675	0.675233
ZNF264	0.211386	-0.0621095	0.13	0.193	1	ZNF264	0.674923
SPTBN1	0.211454	0.089189	0.374	0.321	1	SPTBN1	0.674785
TARS	0.211734	0.0742924	0.278	0.209	1	TARS	0.67421
RPA2	0.211943	-0.114692	0.296	0.374	1	RPA2	0.673781
CDC25B	0.212068	-0.107023	0.339	0.401	1	CDC25B	0.673524
METRNL	0.212186	0.102068	0.139	0.096	1	METRNL	0.673283
ENDOG	0.212297	-0.0832966	0.078	0.123	1	ENDOG	0.673056
TAGLN2	0.212937	0.125421	0.73	0.631	1	TAGLN2	0.671749
G2E3	0.213466	-0.0640348	0.061	0.102	1	G2E3	0.67067
CDK19	0.213466	-0.0818402	0.061	0.102	1	CDK19	0.67067
SHMT2	0.213517	0.142021	0.383	0.348	1	SHMT2	0.670569
CTBP1	0.213795	-0.0543171	0.148	0.209	1	CTBP1	0.670003
DUSP28	0.21382	-0.031776	0.087	0.139	1	DUSP28	0.669951
BCL2L12	0.214077	-0.0807461	0.07	0.112	1	BCL2L12	0.66943
XAB2	0.214283	0.0708563	0.13	0.086	1	XAB2	0.669012
BBIP1	0.214442	-0.0523131	0.13	0.193	1	BBIP1	0.668691
IARS	0.214533	-0.0609519	0.148	0.209	1	IARS	0.668506
HINT2	0.214842	-0.0682333	0.174	0.241	1	HINT2	0.66788
ABCD2	0.215058	0.0838986	0.122	0.08	1	ABCD2	0.667445
CLIC1	0.215092	0.0769127	0.991	0.968	1	CLIC1	0.667375
IQCB1	0.215104	-0.0549153	0.078	0.123	1	IQCB1	0.667352
RWDD1	0.21519	-0.100812	0.513	0.61	1	RWDD1	0.667177
BHLHE40	0.21521	0.101562	0.2	0.15	1	BHLHE40	0.667137
IDI1	0.215223	0.0639207	0.409	0.358	1	IDI1	0.667111
RBL2	0.215337	-0.0772945	0.391	0.46	1	RBL2	0.666881
DPF2	0.215367	0.0906437	0.261	0.214	1	DPF2	0.666822
ITGAM	0.215769	-0.0327198	0.078	0.128	1	ITGAM	0.66601
ELP2	0.215801	0.111267	0.226	0.182	1	ELP2	0.665946
TMEM102	0.216041	-0.0666011	0.07	0.112	1	TMEM102	0.665463
SPATS2L	0.216049	0.12557	0.33	0.283	1	SPATS2L	0.665448
PGPEP1	0.216077	0.0546222	0.165	0.112	1	PGPEP1	0.665392
NCDN	0.216101	0.0722788	0.104	0.064	1	NCDN	0.665343
CAPG	0.216264	-0.102536	0.165	0.225	1	CAPG	0.665016
SAMD3	0.216379	-0.123274	0.157	0.219	1	SAMD3	0.664786
PSMD1	0.216947	0.105842	0.296	0.251	1	PSMD1	0.663647
SSR1	0.217612	-0.077808	0.313	0.39	1	SSR1	0.662318
CCPG1	0.217728	-0.129501	0.252	0.316	1	CCPG1	0.662086
AKAP13	0.218077	-0.115052	0.574	0.658	1	AKAP13	0.661389
SSBP4	0.21836	-0.128036	0.426	0.492	1	SSBP4	0.660827
FGFR1OP2	0.218483	0.114627	0.565	0.567	1	FGFR1OP2	0.660582
HSPA1A	0.218592	0.123567	0.687	0.711	1	HSPA1A	0.660365
CDKN2AIP	0.218664	-0.0326682	0.139	0.203	1	CDKN2AIP	0.660222
UPF2	0.218942	-0.0205646	0.217	0.305	1	UPF2	0.659671
MT1F	0.218975	-0.0544118	0.122	0.182	1	MT1F	0.659605
PPP2R5E	0.219099	0.131737	0.33	0.262	1	PPP2R5E	0.65936
GZMM	0.219222	-0.125615	0.27	0.348	1	GZMM	0.659117
TKT	0.21924	0.100968	0.583	0.503	1	TKT	0.65908
CREB1	0.219592	0.142494	0.365	0.321	1	CREB1	0.658383
TNFSF12	0.219637	-0.0963653	0.461	0.556	1	TNFSF12	0.658295
MSH6	0.219697	0.0860336	0.157	0.112	1	MSH6	0.658177
EXOC7	0.219916	-0.0712277	0.209	0.289	1	EXOC7	0.657742
SYTL3	0.220025	0.103736	0.217	0.171	1	SYTL3	0.657528
RFFL	0.220186	-0.0631175	0.148	0.203	1	RFFL	0.657211
IRF3	0.220274	0.128776	0.513	0.471	1	IRF3	0.657037
MSMO1	0.220479	-0.0889865	0.113	0.166	1	MSMO1	0.656634
UBE2A	0.220527	-0.0454978	0.226	0.316	1	UBE2A	0.656538
LYSMD2	0.220548	-0.0797538	0.339	0.428	1	LYSMD2	0.656497
MRPL14	0.220548	-0.0823129	0.348	0.422	1	MRPL14	0.656497
CNIH1	0.220748	-0.100536	0.33	0.401	1	CNIH1	0.656103
IKBIP	0.220985	0.0984398	0.243	0.187	1	IKBIP	0.655637
ETV7	0.221024	-0.0983072	0.304	0.374	1	ETV7	0.65556
NFIC	0.221313	-0.0587904	0.113	0.166	1	NFIC	0.654993
ERN1	0.221387	0.0894474	0.139	0.096	1	ERN1	0.654848
MRPS5	0.221427	-0.0359001	0.235	0.316	1	MRPS5	0.65477
KLHDC2	0.221558	0.0834524	0.313	0.251	1	KLHDC2	0.654513
C1orf216	0.221559	-0.0665361	0.096	0.144	1	C1orf216	0.654511
CEP192	0.221567	0.11609	0.148	0.107	1	CEP192	0.654495
BRAP	0.221756	-0.0663287	0.078	0.123	1	BRAP	0.654124
FUBP3	0.221793	-0.0688862	0.061	0.102	1	FUBP3	0.654052
CEBPZ	0.221819	-0.0713689	0.235	0.31	1	CEBPZ	0.654001
TNFSF10	0.221872	0.0796978	0.339	0.273	1	TNFSF10	0.653898
METTL2A	0.221878	-0.0406772	0.104	0.16	1	METTL2A	0.653887
MRPL52	0.221913	0.0692986	0.443	0.369	1	MRPL52	0.653817
CNOT6L	0.222242	-0.0629992	0.409	0.503	1	CNOT6L	0.653174
PSMA7	0.222363	0.105372	0.93	0.92	1	PSMA7	0.652937
APOOL	0.222616	0.0499694	0.104	0.064	1	APOOL	0.652444
NEK1	0.22285	-0.081864	0.061	0.102	1	NEK1	0.651988
IL17RA	0.223263	0.0968831	0.209	0.16	1	IL17RA	0.651184
TAF2	0.22344	0.0870605	0.113	0.075	1	TAF2	0.650839
MMP24OS	0.223487	-0.0692348	0.183	0.251	1	MMP24OS	0.650748
ITK	0.22386	0.0567408	0.409	0.332	1	ITK	0.650024
CDCA4	0.22391	-0.057449	0.061	0.102	1	CDCA4	0.649926
CNOT3	0.22391	-0.0645188	0.061	0.102	1	CNOT3	0.649926
COPB1	0.22396	-0.0693294	0.287	0.364	1	COPB1	0.64983
POGLUT1	0.224019	0.103151	0.165	0.123	1	POGLUT1	0.649716
ACOT8	0.224029	-0.0640148	0.07	0.112	1	ACOT8	0.649696
BICRAL	0.224425	0.0745047	0.165	0.118	1	BICRAL	0.648929
SPOCK2	0.224487	-0.058035	0.878	0.898	1	SPOCK2	0.64881
TNIP2	0.224514	-0.0768691	0.296	0.374	1	TNIP2	0.648757
CCDC71L	0.224544	0.0304741	0.226	0.166	1	CCDC71L	0.648699
CDK5RAP2	0.225065	-0.0609921	0.148	0.209	1	CDK5RAP2	0.647692
PLPP5	0.225135	0.0733826	0.148	0.102	1	PLPP5	0.647556
TAP1	0.225168	0.105513	0.626	0.561	1	TAP1	0.647494
ITM2A	0.225229	-0.0363387	0.417	0.519	1	ITM2A	0.647377
PPP1R7	0.225529	0.0612188	0.496	0.455	1	PPP1R7	0.646797
YWHAH	0.225569	-0.0880274	0.452	0.535	1	YWHAH	0.64672
PRCC	0.225623	-0.0654587	0.078	0.123	1	PRCC	0.646616
PPP1R18	0.225796	-0.0668266	0.609	0.738	1	PPP1R18	0.646283
NUFIP2	0.226039	-0.0825445	0.27	0.337	1	NUFIP2	0.645817
MAP3K12	0.226042	-0.0594403	0.061	0.102	1	MAP3K12	0.64581
SMIM29	0.226169	-0.0514282	0.104	0.155	1	SMIM29	0.645568
ARAP1	0.226329	0.0830817	0.157	0.112	1	ARAP1	0.645259
NFKBIZ	0.226448	-0.0838659	0.235	0.305	1	NFKBIZ	0.645031
PARP15	0.226552	-0.0278549	0.113	0.171	1	PARP15	0.644833
ZNHIT6	0.226777	-0.0273702	0.096	0.15	1	ZNHIT6	0.644402
TRIM26	0.226947	-0.0623229	0.096	0.144	1	TRIM26	0.644076
RDH13	0.227078	-0.0819776	0.07	0.112	1	RDH13	0.643825
ERCC1	0.227208	-0.0651497	0.13	0.187	1	ERCC1	0.643577
EMG1	0.227208	-0.0812461	0.13	0.187	1	EMG1	0.643577
CHD2	0.227419	-0.0332778	0.296	0.396	1	CHD2	0.643173
ACAP2	0.227419	-0.0817342	0.313	0.385	1	ACAP2	0.643173
ESYT1	0.227651	-0.0923536	0.278	0.337	1	ESYT1	0.64273
TPM3	0.228552	0.0540009	0.939	0.898	1	TPM3	0.641015
COX18	0.228553	0.102651	0.104	0.07	1	COX18	0.641012
FAM177A1	0.228706	-0.0722457	0.313	0.39	1	FAM177A1	0.640723
44081	0.228777	-0.0465122	0.904	0.909	1	44081	0.640587
TFDP1	0.228922	-0.0465707	0.113	0.166	1	TFDP1	0.640312
OSBPL2	0.229267	-0.0596464	0.061	0.102	1	OSBPL2	0.639658
WDR83OS	0.229893	0.0562153	0.626	0.556	1	WDR83OS	0.638474
ITGB1BP1	0.230092	-0.0791936	0.383	0.46	1	ITGB1BP1	0.638099
ZDHHC17	0.230156	-0.0613957	0.07	0.112	1	ZDHHC17	0.637977
GAK	0.230327	0.116416	0.27	0.214	1	GAK	0.637655
RABL2B	0.230524	-0.0776846	0.078	0.123	1	RABL2B	0.637283
MRPS36	0.230712	0.0591941	0.4	0.326	1	MRPS36	0.636929
C1D	0.230712	-0.099561	0.296	0.39	1	C1D	0.636929
C8orf59	0.230739	-0.0630249	0.374	0.476	1	C8orf59	0.636878
AHNAK	0.23079	-0.0993396	0.452	0.529	1	AHNAK	0.636782
GPM6B	0.23083	0.0835553	0.157	0.112	1	GPM6B	0.636708
MINOS1	0.231836	-0.063631	0.487	0.572	1	MINOS1	0.634819
EID1	0.231841	0.117294	0.722	0.807	1	EID1	0.634809
DCP1A	0.231931	0.0944259	0.174	0.128	1	DCP1A	0.634641
PDCD4	0.232278	-0.056557	0.435	0.529	1	PDCD4	0.633992
LNPEP	0.232445	0.0566115	0.426	0.342	1	LNPEP	0.633679
TRIM41	0.232525	-0.0502031	0.061	0.102	1	TRIM41	0.633531
ANTXR2	0.232806	-0.0825739	0.174	0.241	1	ANTXR2	0.633006
GBP2	0.23286	-0.0780208	0.557	0.642	1	GBP2	0.632904
GDI2	0.232934	0.0907961	0.487	0.46	1	GDI2	0.632768
DUSP23	0.232976	-0.075329	0.122	0.171	1	DUSP23	0.632688
SELENOT	0.233272	-0.0434715	0.487	0.604	1	SELENOT	0.632137
DHX38	0.233462	-0.0548681	0.139	0.203	1	DHX38	0.631784
SUCO	0.233475	-0.0644689	0.087	0.134	1	SUCO	0.63176
SBNO1	0.23362	-0.099116	0.357	0.428	1	SBNO1	0.63149
DHPS	0.233623	-0.0972229	0.304	0.374	1	DHPS	0.631485
CDK11A	0.233634	0.105653	0.235	0.182	1	CDK11A	0.631464
PSMB7	0.233741	-0.0924921	0.435	0.519	1	PSMB7	0.631265
FAHD1	0.234018	-0.0202059	0.096	0.15	1	FAHD1	0.630751
SAR1A	0.234068	-0.0993569	0.183	0.241	1	SAR1A	0.630657
DTYMK	0.234214	-0.0397478	0.113	0.171	1	DTYMK	0.630387
WDFY2	0.234491	0.0635236	0.148	0.102	1	WDFY2	0.629875
BISPR	0.2345	0.0985012	0.13	0.091	1	BISPR	0.629858
UBA7	0.2345	-0.0559675	0.078	0.123	1	UBA7	0.629858
RDH14	0.234843	-0.0761555	0.174	0.235	1	RDH14	0.629222
BCDIN3D	0.235121	0.0754068	0.113	0.075	1	BCDIN3D	0.628709
EIF4H	0.235127	0.104582	0.426	0.385	1	EIF4H	0.628698
TNFAIP8L2	0.235217	-0.083358	0.235	0.299	1	TNFAIP8L2	0.628531
AMFR	0.235353	0.052035	0.122	0.08	1	AMFR	0.62828
KIAA0586	0.235378	-0.0659033	0.13	0.187	1	KIAA0586	0.628233
CNN2	0.235819	-0.0206845	0.348	0.465	1	CNN2	0.627422
HLA-DMB	0.235945	-0.0686208	0.139	0.193	1	HLA-DMB	0.62719
GALT	0.235961	-0.0679069	0.148	0.209	1	GALT	0.627159
TPI1	0.236161	0.110008	0.713	0.727	1	TPI1	0.626792
BCL7B	0.236245	-0.0375627	0.148	0.219	1	BCL7B	0.626637
C17orf67	0.236315	-0.0998914	0.096	0.139	1	C17orf67	0.626508
C3AR1	0.236328	0.0869409	0.104	0.07	1	C3AR1	0.626485
ENTR1	0.236361	-0.0588229	0.087	0.134	1	ENTR1	0.626424
POLD3	0.236394	0.0569431	0.148	0.102	1	POLD3	0.626363
BIN3	0.237256	-0.0907745	0.122	0.171	1	BIN3	0.624784
DENND4C	0.237295	-0.0938772	0.13	0.182	1	DENND4C	0.624712
POLR3GL	0.237941	0.115489	0.409	0.38	1	POLR3GL	0.623531
UBA5	0.238374	0.0983109	0.2	0.15	1	UBA5	0.622741
BAZ1B	0.238437	0.0779352	0.426	0.374	1	BAZ1B	0.622625
ARHGEF7	0.23851	-0.0703024	0.07	0.112	1	ARHGEF7	0.622493
ORC2	0.238523	-0.0584381	0.078	0.123	1	ORC2	0.62247
USE1	0.238624	0.113814	0.313	0.267	1	USE1	0.622287
SIRT2	0.238646	-0.0651002	0.104	0.155	1	SIRT2	0.622246
ZFAND3	0.238683	-0.0759167	0.104	0.15	1	ZFAND3	0.622179
MTMR9	0.239273	-0.0370981	0.087	0.134	1	MTMR9	0.621107
TRIM22	0.23945	-0.0649538	0.513	0.588	1	TRIM22	0.620785
NDFIP2	0.239946	-0.0690811	0.2	0.262	1	NDFIP2	0.619886
MED29	0.240001	-0.0649646	0.139	0.198	1	MED29	0.619786
PARP9	0.240109	-0.115255	0.313	0.38	1	PARP9	0.619592
FUT8	0.240173	0.0995489	0.217	0.176	1	FUT8	0.619476
MRPS9	0.240568	0.0715659	0.226	0.171	1	MRPS9	0.618761
OLFM2	0.240719	-0.103832	0.122	0.171	1	OLFM2	0.61849
KLC1	0.240743	-0.0812665	0.148	0.209	1	KLC1	0.618446
CD226	0.240829	0.0568176	0.409	0.348	1	CD226	0.618291
CNPY2	0.241241	-0.0347342	0.391	0.492	1	CNPY2	0.617548
DNAJB6	0.241455	0.0922932	0.548	0.535	1	DNAJB6	0.617165
BPGM	0.241702	-0.0717911	0.139	0.193	1	BPGM	0.61672
C9orf78	0.241738	0.0917193	0.557	0.497	1	C9orf78	0.616654
EIF1	0.241814	-0.0333298	1	1	1	EIF1	0.616519
ADNP	0.242005	-0.0896429	0.191	0.246	1	ADNP	0.616175
C12orf49	0.242063	-0.0693395	0.13	0.187	1	C12orf49	0.616071
FARSA	0.242299	-0.0560431	0.104	0.155	1	FARSA	0.615649
GSTO1	0.2426	0.108849	0.661	0.62	1	GSTO1	0.615109
TRAF3IP2	0.242767	0.0721881	0.122	0.08	1	TRAF3IP2	0.614811
ARL1	0.242865	0.101699	0.27	0.219	1	ARL1	0.614635
CDC40	0.242999	0.0719175	0.452	0.396	1	CDC40	0.614395
SETD5	0.24304	-0.089055	0.183	0.241	1	SETD5	0.614322
NUDT5	0.243202	0.0781865	0.47	0.412	1	NUDT5	0.614033
DGKZ	0.243208	0.102491	0.504	0.46	1	DGKZ	0.614021
VCPIP1	0.243624	0.119725	0.278	0.225	1	VCPIP1	0.61328
SUB1	0.243701	-0.0641155	0.957	0.947	1	SUB1	0.613144
MANEA-DT	0.243839	-0.029455	0.07	0.112	1	MANEA-DT	0.612896
DGKD	0.243884	0.0875119	0.113	0.075	1	DGKD	0.612817
DAAM1	0.244074	-0.0321846	0.13	0.182	1	DAAM1	0.612478
PDE4A	0.244096	0.100634	0.122	0.086	1	PDE4A	0.61244
TIAL1	0.244224	0.0464533	0.452	0.396	1	TIAL1	0.612211
AMD1	0.244434	0.0452525	0.383	0.31	1	AMD1	0.611839
SAMD9L	0.244595	0.121193	0.443	0.406	1	SAMD9L	0.611552
CEACAM1	0.244608	0.0863875	0.339	0.278	1	CEACAM1	0.611529
BCOR	0.24475	-0.0316402	0.061	0.102	1	BCOR	0.611277
LTB	0.244829	-0.0753569	1	1	1	LTB	0.611138
MIIP	0.244992	0.0854048	0.252	0.203	1	MIIP	0.610849
NUDT16L1	0.2451	-0.0723803	0.217	0.289	1	NUDT16L1	0.610656
CDKN2D	0.245572	-0.0775794	0.313	0.406	1	CDKN2D	0.609821
C12orf45	0.245578	-0.051715	0.096	0.144	1	C12orf45	0.60981
HCCS	0.245632	-0.0710893	0.087	0.128	1	HCCS	0.609716
VTI1A	0.246413	0.0919962	0.174	0.123	1	VTI1A	0.608337
NDUFB5	0.246431	0.106862	0.591	0.551	1	NDUFB5	0.608304
ATP5MC3	0.246631	-0.05787	0.704	0.733	1	ATP5MC3	0.607952
METTL2B	0.246715	0.0737232	0.13	0.091	1	METTL2B	0.607804
EHMT1	0.247539	0.054942	0.27	0.209	1	EHMT1	0.606356
SRPK2	0.247544	0.0793717	0.461	0.385	1	SRPK2	0.606347
ZNF22	0.247592	0.0686122	0.235	0.182	1	ZNF22	0.606263
GTF2E2	0.247605	0.0673053	0.2	0.15	1	GTF2E2	0.606241
PIEZO1	0.247634	-0.0469585	0.148	0.209	1	PIEZO1	0.606189
PIGBOS1	0.247801	-0.0867147	0.235	0.294	1	PIGBOS1	0.605897
GOPC	0.247964	0.0807719	0.296	0.241	1	GOPC	0.605612
ALKBH7	0.24808	0.0888362	0.513	0.471	1	ALKBH7	0.605408
TMEM159	0.248161	-0.0457727	0.061	0.102	1	TMEM159	0.605267
GSTP1	0.249048	-0.114493	0.47	0.551	1	GSTP1	0.603717
TSC1	0.24916	-0.0267197	0.087	0.134	1	TSC1	0.603521
LINC02001	0.249429	0.0912284	0.122	0.086	1	LINC02001	0.603053
TFDP2	0.249475	0.0794054	0.113	0.075	1	TFDP2	0.602972
RAB33A	0.249663	-0.0679188	0.243	0.31	1	RAB33A	0.602645
CCNT2	0.2498	0.100195	0.183	0.139	1	CCNT2	0.602407
MT-ND1	0.249819	-0.0222237	1	1	1	MT-ND1	0.602374
LINC00847	0.250073	-0.0589482	0.113	0.16	1	LINC00847	0.601934
CSAD	0.250117	-0.0543717	0.13	0.182	1	CSAD	0.601856
SLC33A1	0.250343	-0.0464837	0.07	0.112	1	SLC33A1	0.601464
COX8A	0.250466	-0.0779119	0.878	0.872	1	COX8A	0.601252
EIF4E2	0.250755	0.0635767	0.339	0.289	1	EIF4E2	0.60075
CEP63	0.25102	0.0228343	0.148	0.102	1	CEP63	0.600292
INPP5F	0.251605	-0.01599	0.061	0.102	1	INPP5F	0.599281
CENPT	0.251744	0.0823161	0.148	0.107	1	CENPT	0.59904
GOT2	0.25178	0.0904315	0.157	0.118	1	GOT2	0.598978
EIF2D	0.251882	0.062535	0.2	0.15	1	EIF2D	0.598802
RNF139	0.252227	0.0824463	0.2	0.155	1	RNF139	0.598208
AC092683.1	0.25233	0.0633801	0.322	0.257	1	AC092683.1	0.59803
JAK3	0.252369	-0.0909811	0.313	0.401	1	JAK3	0.597963
ZNFX1	0.252508	-0.114228	0.148	0.193	1	ZNFX1	0.597724
C11orf54	0.25276	-0.0449964	0.061	0.102	1	C11orf54	0.597291
SELPLG	0.252863	-0.0975935	0.47	0.54	1	SELPLG	0.597114
ADAM12	0.252988	-0.0517217	0.078	0.123	1	ADAM12	0.596901
SRPRA	0.253071	0.102126	0.391	0.337	1	SRPRA	0.596758
ZNF236	0.253353	-0.0862505	0.07	0.107	1	ZNF236	0.596274
PAXIP1-AS2	0.253353	-0.0962955	0.07	0.107	1	PAXIP1-AS2	0.596274
FBXO45	0.253358	-0.0461747	0.139	0.198	1	FBXO45	0.596265
SELENOS	0.253383	-0.0804304	0.313	0.38	1	SELENOS	0.596223
LUZP1	0.253451	-0.0526984	0.348	0.412	1	LUZP1	0.596106
TRIM28	0.253626	0.0761639	0.296	0.251	1	TRIM28	0.595806
RPS15	0.25375	-0.0324966	1	1	1	RPS15	0.595594
RNF220	0.254013	0.0704135	0.113	0.075	1	RNF220	0.595145
C12orf43	0.254013	0.0657762	0.113	0.075	1	C12orf43	0.595145
NUTM2A-AS1	0.254044	0.075315	0.13	0.091	1	NUTM2A-AS1	0.595092
LIN7C	0.254169	0.0401622	0.183	0.128	1	LIN7C	0.594877
PCNX2	0.254714	0.0840713	0.148	0.107	1	PCNX2	0.593947
PNMA1	0.254781	-0.0820653	0.078	0.118	1	PNMA1	0.593834
CTSW	0.254781	-0.0868873	0.078	0.118	1	CTSW	0.593834
PTPN1	0.254895	-0.0352069	0.278	0.348	1	PTPN1	0.593638
SP100	0.255136	0.0931377	0.704	0.695	1	SP100	0.593229
METTL15	0.255156	0.0771561	0.113	0.075	1	METTL15	0.593194
RPL32	0.255164	-0.033289	1	1	1	RPL32	0.593181
UBE2H	0.255178	0.110054	0.304	0.267	1	UBE2H	0.593157
TXNDC9	0.255225	-0.0639486	0.296	0.374	1	TXNDC9	0.593076
VBP1	0.255225	-0.0795996	0.304	0.369	1	VBP1	0.593076
SKAP1	0.255279	-0.0683761	0.652	0.738	1	SKAP1	0.592985
PSEN1	0.25538	0.0649916	0.183	0.134	1	PSEN1	0.592812
SNRPD1	0.255719	0.126457	0.504	0.455	1	SNRPD1	0.592237
ZNF428	0.255731	-0.0846389	0.243	0.299	1	ZNF428	0.592216
GPN1	0.25583	0.0571167	0.2	0.144	1	GPN1	0.592048
RLIM	0.255855	-0.0403833	0.07	0.112	1	RLIM	0.592005
GPX7	0.255936	0.0866978	0.122	0.086	1	GPX7	0.591869
NKG7	0.255983	0.306016	0.104	0.07	1	NKG7	0.591789
CD84	0.256048	-0.0374801	0.226	0.299	1	CD84	0.591678
COTL1	0.256199	0.0693414	0.765	0.749	1	COTL1	0.591423
CEP85L	0.256275	0.0697655	0.261	0.214	1	CEP85L	0.591293
ITPA	0.25631	-0.0752471	0.261	0.332	1	ITPA	0.591234
SIN3A	0.257097	0.0677882	0.226	0.176	1	SIN3A	0.589902
RPL18A	0.257153	-0.0503142	0.991	1	1	RPL18A	0.589809
CHFR	0.25723	0.0718254	0.13	0.091	1	CHFR	0.589678
CKS2	0.257258	-0.0962603	0.183	0.23	1	CKS2	0.589632
ETV6	0.257506	0.0507961	0.174	0.123	1	ETV6	0.589213
MRPL49	0.257544	-0.063681	0.104	0.15	1	MRPL49	0.589148
FDX1	0.257574	0.107471	0.374	0.326	1	FDX1	0.589098
SNRNP200	0.257921	0.101875	0.409	0.364	1	SNRNP200	0.588513
MDH2	0.258022	0.0923022	0.53	0.513	1	MDH2	0.588344
PRKCQ	0.25809	0.138503	0.27	0.23	1	PRKCQ	0.588228
FAM50A	0.258113	-0.0406614	0.348	0.444	1	FAM50A	0.58819
NDUFS6	0.258162	0.0339254	0.757	0.674	1	NDUFS6	0.588108
TCP1	0.258523	-0.0761592	0.278	0.353	1	TCP1	0.587501
TCF7	0.259017	-0.111231	0.339	0.401	1	TCF7	0.586672
SH3BP2	0.259533	-0.0921948	0.148	0.198	1	SH3BP2	0.585807
CSTB	0.259745	0.066193	0.774	0.77	1	CSTB	0.585453
THAP2	0.259771	-0.0276989	0.061	0.102	1	THAP2	0.58541
NDUFAB1	0.25982	0.0800951	0.626	0.578	1	NDUFAB1	0.585328
TRIM69	0.25993	-0.101201	0.33	0.39	1	TRIM69	0.585144
CCND3	0.260044	-0.0781505	0.435	0.497	1	CCND3	0.584954
SLC2A1	0.260239	-0.0445892	0.096	0.144	1	SLC2A1	0.584628
FTH1	0.260587	0.0406165	1	1	1	FTH1	0.584047
PPP2CA	0.260615	0.120905	0.365	0.332	1	PPP2CA	0.584
MRPL28	0.260764	-0.063528	0.357	0.444	1	MRPL28	0.583752
SOCS2	0.260768	-0.0812338	0.33	0.401	1	SOCS2	0.583746
HMGB1	0.260863	-0.0630725	0.948	0.973	1	HMGB1	0.583587
ZNF507	0.260926	0.0585815	0.113	0.075	1	ZNF507	0.583483
FAM160B2	0.260952	-0.0211608	0.061	0.102	1	FAM160B2	0.58344
NOL9	0.261166	0.0889231	0.191	0.144	1	NOL9	0.583083
CUL2	0.261306	0.0967025	0.243	0.198	1	CUL2	0.58285
EEF1E1	0.261307	0.124231	0.27	0.209	1	EEF1E1	0.58285
DPP7	0.261407	-0.0458326	0.591	0.69	1	DPP7	0.582683
DHX15	0.261578	0.091246	0.252	0.209	1	DHX15	0.5824
NFE2L2	0.261713	0.0860097	0.47	0.428	1	NFE2L2	0.582175
API5	0.261852	-0.0856541	0.191	0.251	1	API5	0.581945
DHRS7B	0.262092	0.0571042	0.139	0.096	1	DHRS7B	0.581545
MED17	0.262156	-0.0553484	0.113	0.166	1	MED17	0.581439
LASP1	0.262683	-0.0803789	0.252	0.321	1	LASP1	0.580569
ZNF75A	0.262762	-0.0856673	0.191	0.246	1	ZNF75A	0.580437
ADD1	0.262876	-0.0171248	0.339	0.444	1	ADD1	0.580249
PSMD11	0.263131	0.0915	0.47	0.412	1	PSMD11	0.579827
TXNL1	0.26314	0.130032	0.487	0.428	1	TXNL1	0.579813
THAP7	0.26326	0.116572	0.261	0.214	1	THAP7	0.579615
OLA1	0.263527	-0.0631711	0.27	0.364	1	OLA1	0.579174
GMPR2	0.263647	0.0654754	0.252	0.203	1	GMPR2	0.578978
ATP5F1C	0.263801	0.106299	0.617	0.604	1	ATP5F1C	0.578724
INTS10	0.263841	0.0971479	0.261	0.219	1	INTS10	0.578658
APPBP2	0.263928	-0.0545207	0.165	0.23	1	APPBP2	0.578515
SUMO1	0.264075	0.0370653	0.722	0.69	1	SUMO1	0.578273
ALKBH5	0.264213	-0.0553716	0.191	0.251	1	ALKBH5	0.578046
DKC1	0.264316	0.0699068	0.191	0.139	1	DKC1	0.577876
SAP30	0.264582	-0.0740091	0.078	0.118	1	SAP30	0.577439
NDUFA11	0.26459	-0.0679833	0.704	0.775	1	NDUFA11	0.577427
WASHC4	0.264622	0.0927758	0.261	0.219	1	WASHC4	0.577374
HLA-C	0.264634	0.0668139	1	1	1	HLA-C	0.577354
NDUFB11	0.265043	-0.0735306	0.748	0.802	1	NDUFB11	0.576684
PTGER2	0.26529	-0.0954122	0.365	0.417	1	PTGER2	0.576279
ORC3	0.265568	-0.0466268	0.087	0.134	1	ORC3	0.575824
PHF20	0.265637	0.072297	0.348	0.305	1	PHF20	0.575711
ALDH16A1	0.26581	0.0690305	0.148	0.107	1	ALDH16A1	0.575429
OCIAD1	0.266164	-0.106005	0.435	0.492	1	OCIAD1	0.574851
CYHR1	0.266342	0.111682	0.2	0.16	1	CYHR1	0.57456
WDR74	0.266528	-0.0639703	0.148	0.203	1	WDR74	0.574257
DUSP10	0.266786	0.0587755	0.113	0.075	1	DUSP10	0.573838
RYK	0.266795	-0.0579666	0.078	0.118	1	RYK	0.573822
TRAV4	0.266836	0.124764	0.104	0.07	1	TRAV4	0.573756
COPS7A	0.266836	0.0522335	0.104	0.07	1	COPS7A	0.573756
LIMS1	0.266898	0.064505	0.557	0.503	1	LIMS1	0.573654
PDXK	0.266915	-0.0600429	0.165	0.219	1	PDXK	0.573628
BLZF1	0.26704	0.0607568	0.122	0.086	1	BLZF1	0.573423
DEAF1	0.26723	0.070842	0.235	0.187	1	DEAF1	0.573115
PATL2	0.267352	0.124475	0.217	0.171	1	PATL2	0.572917
NMD3	0.267353	-0.0673341	0.104	0.15	1	NMD3	0.572914
THOC7	0.267868	-0.0313739	0.348	0.444	1	THOC7	0.572079
AGPS	0.267956	-0.0680205	0.13	0.182	1	AGPS	0.571937
INPP5K	0.267974	-0.0854215	0.113	0.16	1	INPP5K	0.571907
GYPC	0.26808	0.0373168	0.887	0.845	1	GYPC	0.571736
ARHGAP12	0.268348	-0.0715394	0.104	0.15	1	ARHGAP12	0.571301
MSH3	0.268384	-0.0631383	0.139	0.193	1	MSH3	0.571243
SCOC	0.268846	0.0958425	0.157	0.118	1	SCOC	0.570496
ZFPM1	0.268893	-0.0734401	0.096	0.139	1	ZFPM1	0.57042
APBB1IP	0.269263	-0.0418015	0.757	0.775	1	APBB1IP	0.569824
MHENCR	0.269368	-0.0674988	0.13	0.176	1	MHENCR	0.569654
PPM1K	0.269533	-0.0671913	0.304	0.39	1	PPM1K	0.569389
CHST11	0.269592	-0.0575058	0.209	0.283	1	CHST11	0.569293
FRYL	0.26964	-0.0413281	0.209	0.273	1	FRYL	0.569216
RHOT2	0.26965	0.0752062	0.226	0.176	1	RHOT2	0.569199
RPL36A	0.269853	-0.103114	0.565	0.594	1	RPL36A	0.568872
RPRD1A	0.270139	-0.0808126	0.078	0.118	1	RPRD1A	0.568413
TMOD3	0.270145	0.0821901	0.47	0.465	1	TMOD3	0.568403
PEBP1	0.2706	0.0728913	0.687	0.711	1	PEBP1	0.567672
MARK3	0.270626	-0.0711531	0.235	0.299	1	MARK3	0.567631
RIN3	0.270647	-0.0917877	0.104	0.144	1	RIN3	0.567597
ACSL5	0.270962	-0.0559556	0.096	0.139	1	ACSL5	0.567091
ARHGEF6	0.271047	-0.049768	0.174	0.241	1	ARHGEF6	0.566955
CD3D	0.271081	0.0734715	1	1	1	CD3D	0.566902
NSL1	0.271195	-0.0313888	0.2	0.278	1	NSL1	0.566718
B3GNT2	0.271348	0.0953585	0.157	0.118	1	B3GNT2	0.566474
MTMR14	0.27144	0.0906178	0.174	0.134	1	MTMR14	0.566326
MFSD11	0.271532	0.0951805	0.217	0.176	1	MFSD11	0.566178
FURIN	0.271745	-0.114015	0.148	0.198	1	FURIN	0.565839
TLNRD1	0.271816	-0.10294	0.174	0.225	1	TLNRD1	0.565724
DNAJC2	0.272211	-0.0275431	0.157	0.219	1	DNAJC2	0.565095
EIF2AK4	0.272222	0.0526394	0.2	0.15	1	EIF2AK4	0.565077
PCF11	0.272308	-0.0750019	0.296	0.348	1	PCF11	0.56494
TSPO	0.272549	0.0651778	0.817	0.797	1	TSPO	0.564555
NOP14	0.272678	0.0679182	0.157	0.112	1	NOP14	0.56435
UBE2J2	0.272715	-0.0425455	0.261	0.348	1	UBE2J2	0.564291
DEK	0.272928	0.0415185	0.704	0.722	1	DEK	0.563952
TFG	0.273035	0.162565	0.235	0.209	1	TFG	0.563781
UXT	0.273157	0.0919043	0.704	0.69	1	UXT	0.563587
PRNP	0.27332	-0.0769558	0.2	0.257	1	PRNP	0.563329
THUMPD1	0.273447	0.0850967	0.357	0.299	1	THUMPD1	0.563127
HSCB	0.273497	-0.063533	0.07	0.107	1	HSCB	0.563047
NBN	0.273521	0.039195	0.252	0.193	1	NBN	0.56301
MTRF1L	0.273842	-0.0588389	0.087	0.128	1	MTRF1L	0.5625
ATR	0.274089	-0.0447597	0.07	0.107	1	ATR	0.562109
NDUFS7	0.27465	0.0790709	0.574	0.503	1	NDUFS7	0.561221
POC5	0.274928	-0.0424261	0.087	0.128	1	POC5	0.560781
H2AFV	0.275024	0.0385363	0.757	0.674	1	H2AFV	0.560629
INTS5	0.27514	0.0441721	0.113	0.075	1	INTS5	0.560446
CTU1	0.275277	-0.0538791	0.113	0.16	1	CTU1	0.560229
IL1R1	0.275383	-0.0814939	0.104	0.15	1	IL1R1	0.560063
LCK	0.275445	0.0583803	0.922	0.93	1	LCK	0.559966
GGA2	0.275878	0.0360096	0.183	0.134	1	GGA2	0.559283
RARA	0.27589	-0.0677858	0.104	0.15	1	RARA	0.559264
SEC13	0.27615	-0.0466216	0.139	0.198	1	SEC13	0.558855
CCDC32	0.276335	-0.0651254	0.217	0.289	1	CCDC32	0.558564
HNRNPAB	0.276582	0.120629	0.313	0.278	1	HNRNPAB	0.558176
BABAM2	0.276788	-0.0831994	0.139	0.187	1	BABAM2	0.557853
FAM129B	0.276911	-0.0568098	0.078	0.118	1	FAM129B	0.557659
CCNY	0.277022	-0.071525	0.2	0.262	1	CCNY	0.557485
ZNF544	0.27756	0.0316762	0.113	0.075	1	ZNF544	0.556644
AHR	0.277654	-0.056263	0.07	0.107	1	AHR	0.556495
SDAD1	0.27787	-0.0738926	0.191	0.251	1	SDAD1	0.556158
ADI1	0.278078	0.05033	0.33	0.267	1	ADI1	0.555834
ELAC2	0.278167	0.0445305	0.113	0.075	1	ELAC2	0.555695
PDCD7	0.278263	0.113619	0.374	0.342	1	PDCD7	0.555545
SVIP	0.278319	0.0878223	0.374	0.326	1	SVIP	0.555458
FN3KRP	0.278352	-0.0355999	0.087	0.134	1	FN3KRP	0.555406
ACYP1	0.278436	-0.0524828	0.104	0.15	1	ACYP1	0.555274
B3GNTL1	0.278472	0.0933843	0.122	0.086	1	B3GNTL1	0.555218
FASTK	0.278732	-0.0506288	0.113	0.16	1	FASTK	0.554814
UBE2G1	0.279119	0.0777492	0.226	0.176	1	UBE2G1	0.554211
PIP4K2A	0.279338	0.0937001	0.4	0.348	1	PIP4K2A	0.553871
WDR54	0.279406	-0.047502	0.209	0.278	1	WDR54	0.553765
LRRC58	0.279555	-0.0241268	0.157	0.219	1	LRRC58	0.553533
HSP90AB1	0.27974	-0.0378086	0.8	0.872	1	HSP90AB1	0.553245
MOB1A	0.280119	0.104153	0.522	0.524	1	MOB1A	0.552658
MICU1	0.280206	-0.0686269	0.122	0.171	1	MICU1	0.552523
KIF2A	0.280386	-0.150182	0.522	0.588	1	KIF2A	0.552243
SMC3	0.280428	-0.146238	0.609	0.62	1	SMC3	0.552178
NAGLU	0.280525	0.0564054	0.104	0.07	1	NAGLU	0.552028
SETX	0.280694	-0.112247	0.417	0.481	1	SETX	0.551767
ANKRD13A	0.281157	-0.0171059	0.139	0.203	1	ANKRD13A	0.55105
RUBCN	0.281216	0.0374856	0.113	0.075	1	RUBCN	0.55096
RAB11FIP4	0.281252	-0.0619945	0.07	0.107	1	RAB11FIP4	0.550905
MAP1LC3A	0.281252	-0.0640758	0.07	0.107	1	MAP1LC3A	0.550905
OARD1	0.281455	-0.0647818	0.209	0.273	1	OARD1	0.55059
MAIP1	0.28149	-0.055647	0.078	0.118	1	MAIP1	0.550537
INPP1	0.281512	-0.0507297	0.104	0.15	1	INPP1	0.550502
TSPOAP1-AS1	0.281512	-0.0576429	0.104	0.15	1	TSPOAP1-AS1	0.550502
GDE1	0.282149	-0.0338072	0.13	0.187	1	GDE1	0.549521
EXOSC6	0.282172	-0.0576003	0.183	0.241	1	EXOSC6	0.549487
MRPL13	0.282356	0.0675406	0.409	0.348	1	MRPL13	0.549204
PARVG	0.282526	0.018597	0.278	0.369	1	PARVG	0.548942
AKAP8	0.282583	0.11023	0.13	0.091	1	AKAP8	0.548854
TC2N	0.283259	-0.0766617	0.191	0.241	1	TC2N	0.547816
LARS	0.283301	0.111628	0.339	0.299	1	LARS	0.547752
MYL12B	0.283379	0.072409	1	0.979	1	MYL12B	0.547632
JMY	0.283554	0.0742552	0.174	0.134	1	JMY	0.547363
RASA1	0.283605	0.05723	0.148	0.107	1	RASA1	0.547286
MRPL4	0.283837	-0.0775515	0.278	0.342	1	MRPL4	0.546932
ZBTB44	0.283846	-0.0464467	0.139	0.193	1	ZBTB44	0.546918
DIS3L2	0.283924	0.0704197	0.174	0.128	1	DIS3L2	0.546798
SRP14	0.283987	0.0573434	0.983	0.979	1	SRP14	0.546701
TSTD1	0.284012	-0.0709504	0.643	0.684	1	TSTD1	0.546663
DNAJC13	0.284035	0.050365	0.157	0.112	1	DNAJC13	0.546628
RPL35A	0.284295	-0.048599	1	1	1	RPL35A	0.546231
PFDN1	0.284495	0.0961388	0.313	0.262	1	PFDN1	0.545925
IFI6	0.284645	0.141792	0.365	0.348	1	IFI6	0.545696
EPRS	0.284758	0.140421	0.365	0.332	1	EPRS	0.545524
ARRDC3	0.284958	-0.0592837	0.078	0.118	1	ARRDC3	0.54522
JADE2	0.285184	0.135779	0.209	0.166	1	JADE2	0.544875
GRN	0.285728	-0.0643421	0.113	0.16	1	GRN	0.544047
ZFP90	0.28575	-0.0488202	0.096	0.139	1	ZFP90	0.544013
SPART	0.28575	-0.0513314	0.096	0.139	1	SPART	0.544013
STOML2	0.285842	-0.0664537	0.348	0.406	1	STOML2	0.543874
MCTS1	0.286082	0.10031	0.296	0.251	1	MCTS1	0.543509
TMEM126B	0.286089	0.0714522	0.339	0.294	1	TMEM126B	0.543498
TCAIM	0.286097	-0.0509149	0.07	0.107	1	TCAIM	0.543487
KLHL5	0.28667	0.0791018	0.122	0.086	1	KLHL5	0.542618
SURF1	0.286837	0.075596	0.339	0.294	1	SURF1	0.542365
SERBP1	0.286919	0.0790629	0.878	0.84	1	SERBP1	0.542241
PRMT2	0.287172	0.0814573	0.73	0.679	1	PRMT2	0.541858
QKI	0.287179	0.119952	0.27	0.219	1	QKI	0.541847
FOXP1	0.287253	0.156602	0.487	0.476	1	FOXP1	0.541736
LRRC32	0.287285	-0.0661756	0.078	0.118	1	LRRC32	0.541687
RNF8	0.287341	-0.0844217	0.139	0.182	1	RNF8	0.541602
POGK	0.28752	0.0495646	0.183	0.134	1	POGK	0.541332
STT3B	0.287647	0.165215	0.391	0.358	1	STT3B	0.54114
STX17	0.287734	0.0708904	0.157	0.118	1	STX17	0.541009
PRPF19	0.287734	-0.0588774	0.104	0.15	1	PRPF19	0.541009
SNHG7	0.287961	-0.0779358	0.278	0.332	1	SNHG7	0.540666
DCAF8	0.288003	0.0944198	0.165	0.123	1	DCAF8	0.540603
DCAF6	0.288244	0.0872024	0.157	0.112	1	DCAF6	0.54024
GSS	0.288293	-0.0670075	0.13	0.176	1	GSS	0.540166
HERPUD1	0.288498	-0.0505395	0.53	0.578	1	HERPUD1	0.539857
FBXO3	0.288518	0.0732994	0.252	0.198	1	FBXO3	0.539826
CSE1L	0.28854	-0.0474773	0.07	0.107	1	CSE1L	0.539794
IRS2	0.288626	-0.0897632	0.07	0.102	1	IRS2	0.539664
OXNAD1	0.289074	-0.11131	0.313	0.369	1	OXNAD1	0.538991
KLHL7	0.289481	0.0528671	0.104	0.07	1	KLHL7	0.53838
COQ9	0.289626	-0.057659	0.078	0.118	1	COQ9	0.538163
STARD3	0.289752	0.0645895	0.209	0.166	1	STARD3	0.537973
STRADA	0.289767	-0.0460254	0.07	0.107	1	STRADA	0.537951
GLG1	0.290041	0.047688	0.487	0.439	1	GLG1	0.53754
TSPYL1	0.290226	0.127654	0.296	0.262	1	TSPYL1	0.537264
LAGE3	0.290229	-0.0411024	0.217	0.273	1	LAGE3	0.537259
NUP188	0.290382	0.0897937	0.113	0.08	1	NUP188	0.53703
NGLY1	0.290384	0.101067	0.2	0.16	1	NGLY1	0.537028
BSDC1	0.290406	0.0865197	0.243	0.198	1	BSDC1	0.536995
[truncated: 3,624 more rows]

## Sheet: S2C-C4 Bispecific vs. IgG
Table S2C: Differential Expression Analysis CD4 Tregs cluster 4 Bispecific vs. IgG
	p_val	avg_logFC	pct.1	pct.2	p_val_adj	Gene_ID	logP
HLA-B	6.14034e-06	0.146594	1	1	0.124023	HLA-B	5.21181
ISG15	8.87802e-06	0.449055	0.812	0.674	0.179318	ISG15	5.05168
RPL18	7.30521e-05	-0.133345	1	0.995	1	RPL18	4.13637
TNFSF10	9.07509e-05	0.229995	0.504	0.273	1	TNFSF10	4.04215
HLA-A	0.000118287	0.140981	1	1	1	HLA-A	3.92706
RPS13	0.000135332	-0.150398	1	1	1	RPS13	3.8686
EPSTI1	0.000230854	0.231599	0.617	0.422	1	EPSTI1	3.63666
B2M	0.0004288	0.10558	1	1	1	B2M	3.36775
PDCD5	0.000546439	0.242983	0.639	0.471	1	PDCD5	3.26246
ZC3H15	0.000800301	-0.288803	0.444	0.594	1	ZC3H15	3.09675
PELI1	0.000824778	0.206457	0.211	0.08	1	PELI1	3.08366
WDR55	0.000847834	0.19735	0.188	0.07	1	WDR55	3.07169
RPL9	0.000872842	-0.122827	1	1	1	RPL9	3.05906
UNC93B1	0.000970285	0.160894	0.12	0.027	1	UNC93B1	3.0131
SKP1	0.000994204	0.191879	0.94	0.941	1	SKP1	3.00252
RPL13A	0.00102622	-0.10319	1	1	1	RPL13A	2.98876
OAS1	0.00116962	0.215811	0.398	0.241	1	OAS1	2.93196
GPR137	0.00138462	0.147015	0.105	0.021	1	GPR137	2.85867
CMTM6	0.00229616	0.307421	0.835	0.765	1	CMTM6	2.639
ASXL2	0.00253305	-0.208676	0.15	0.299	1	ASXL2	2.59636
TP53I13	0.00257026	-0.160018	0.083	0.209	1	TP53I13	2.59002
RPL22	0.00260335	-0.142174	1	1	1	RPL22	2.58447
ZNF22	0.002723	0.186269	0.323	0.182	1	ZNF22	2.56495
SDHAF1	0.00281354	-0.170436	0.105	0.241	1	SDHAF1	2.55075
ZFP36L2	0.00292862	-0.293015	0.759	0.802	1	ZFP36L2	2.53334
LY6E	0.00301215	0.297307	0.737	0.599	1	LY6E	2.52112
MTIF2	0.0032064	-0.19917	0.075	0.187	1	MTIF2	2.49398
RPS18	0.00344187	-0.134454	1	1	1	RPS18	2.46321
STX6	0.00350251	0.170825	0.195	0.086	1	STX6	2.45562
TSR1	0.00350328	-0.135212	0.03	0.123	1	TSR1	2.45553
BRWD1	0.00357376	-0.217037	0.203	0.342	1	BRWD1	2.44687
ETF1	0.00371696	0.156359	0.271	0.139	1	ETF1	2.42981
PAFAH1B1	0.00375884	0.183333	0.541	0.385	1	PAFAH1B1	2.42495
UBB	0.00377953	0.173815	0.955	0.947	1	UBB	2.42256
HARS	0.00379583	-0.159872	0.18	0.332	1	HARS	2.42069
ATP6V1F	0.00385858	0.175	0.707	0.578	1	ATP6V1F	2.41357
YARS	0.00387439	0.202051	0.331	0.187	1	YARS	2.4118
NDUFA11	0.00397149	-0.158157	0.602	0.775	1	NDUFA11	2.40105
MAPKAPK5-AS1	0.00411809	-0.208751	0.195	0.332	1	MAPKAPK5-AS1	2.3853
DIRC2	0.0041346	0.120222	0.113	0.032	1	DIRC2	2.38357
RAB29	0.00419887	-0.183597	0.308	0.471	1	RAB29	2.37687
PAFAH1B3	0.00420411	0.137087	0.278	0.144	1	PAFAH1B3	2.37633
NIPA2	0.00423358	0.171841	0.286	0.15	1	NIPA2	2.37329
ZBTB1	0.00426472	-0.210826	0.278	0.422	1	ZBTB1	2.37011
PSMB9	0.00427216	0.185992	0.902	0.861	1	PSMB9	2.36935
GABPB1-AS1	0.00433744	-0.268144	0.406	0.529	1	GABPB1-AS1	2.36277
RPS3	0.00438251	-0.0817347	1	1	1	RPS3	2.35828
SPPL2A	0.00440931	0.206298	0.414	0.267	1	SPPL2A	2.35563
TCP11L2	0.00446569	-0.176246	0.09	0.203	1	TCP11L2	2.35011
MRPS10	0.00459753	0.179686	0.429	0.267	1	MRPS10	2.33748
MRPL48	0.00484781	0.181133	0.226	0.112	1	MRPL48	2.31445
CCDC12	0.0048669	-0.176091	0.421	0.545	1	CCDC12	2.31275
PRKCA	0.0049846	0.117545	0.195	0.086	1	PRKCA	2.30237
ELMO1	0.00500097	0.175935	0.271	0.144	1	ELMO1	2.30095
COX7A2	0.00524114	0.164155	0.91	0.781	1	COX7A2	2.28057
BST2	0.00527757	0.244969	0.669	0.567	1	BST2	2.27757
PDE7A	0.00539021	-0.218258	0.18	0.321	1	PDE7A	2.26839
PTPN6	0.00585053	0.200068	0.368	0.23	1	PTPN6	2.2328
PIGS	0.00603943	0.142008	0.158	0.064	1	PIGS	2.219
ABLIM1	0.00613154	-0.205302	0.143	0.267	1	ABLIM1	2.21243
PTPN2	0.00619094	0.154227	0.436	0.305	1	PTPN2	2.20824
CYTOR	0.00675638	0.276806	0.782	0.69	1	CYTOR	2.17029
PMVK	0.00681783	0.206068	0.376	0.251	1	PMVK	2.16635
RPUSD3	0.00687568	-0.144805	0.113	0.235	1	RPUSD3	2.16268
ACTR3C	0.00727483	0.111135	0.105	0.032	1	ACTR3C	2.13818
RPL7	0.00729415	-0.116708	1	1	1	RPL7	2.13703
PSMD1	0.00777005	0.193502	0.376	0.251	1	PSMD1	2.10958
SUGP2	0.00781767	-0.176308	0.113	0.225	1	SUGP2	2.10692
C1QBP	0.0081293	-0.160807	0.496	0.642	1	C1QBP	2.08995
HACD2	0.0081654	0.120298	0.173	0.075	1	HACD2	2.08802
TFG	0.00825944	0.222419	0.316	0.209	1	TFG	2.08305
MED19	0.00826568	-0.162383	0.105	0.219	1	MED19	2.08272
NMT2	0.0083282	0.123081	0.165	0.07	1	NMT2	2.07945
RPS27	0.00836103	-0.104698	1	1	1	RPS27	2.07774
HMGB2	0.0084034	-0.219929	0.519	0.631	1	HMGB2	2.07554
ITPA	0.00848593	-0.160093	0.195	0.332	1	ITPA	2.0713
SUMO2	0.008513	0.14309	0.985	0.973	1	SUMO2	2.06992
SNUPN	0.00872525	0.136217	0.226	0.112	1	SNUPN	2.05922
TMEM189	0.00875272	0.123517	0.12	0.043	1	TMEM189	2.05786
MYC	0.00893989	-0.166935	0.083	0.187	1	MYC	2.04867
XAB2	0.00895806	0.127034	0.188	0.086	1	XAB2	2.04779
ZNF576	0.00944243	0.126953	0.18	0.08	1	ZNF576	2.02492
WDR70	0.0096237	-0.0841855	0.038	0.123	1	WDR70	2.01666
MARCKSL1	0.00966458	-0.198303	0.075	0.171	1	MARCKSL1	2.01482
POMGNT1	0.00989007	0.141878	0.143	0.059	1	POMGNT1	2.0048
INF2	0.0100252	-0.142997	0.075	0.176	1	INF2	1.99891
LY96	0.0100644	0.208059	0.346	0.23	1	LY96	1.99721
FBXO33	0.0101782	-0.17992	0.068	0.16	1	FBXO33	1.99233
DDX56	0.010257	0.152059	0.241	0.128	1	DDX56	1.98898
NENF	0.0102916	0.174682	0.278	0.166	1	NENF	1.98752
LDHB	0.0104296	-0.127144	0.932	0.968	1	LDHB	1.98173
ADAM19	0.0105514	-0.150676	0.098	0.203	1	ADAM19	1.97669
OAZ1	0.0106191	0.108133	0.985	1	1	OAZ1	1.97391
FAM3C	0.0106281	0.113018	0.113	0.037	1	FAM3C	1.97355
CORO2A	0.0106806	0.131999	0.143	0.059	1	CORO2A	1.97141
ARF5	0.0107067	-0.163143	0.271	0.417	1	ARF5	1.97034
MAGEH1	0.0108689	0.272767	0.308	0.193	1	MAGEH1	1.96381
RPL13	0.011057	-0.0879741	1	1	1	RPL13	1.95636
TCAF2	0.0110929	0.159503	0.18	0.091	1	TCAF2	1.95496
HLA-C	0.0115512	0.0972918	1	1	1	HLA-C	1.93737
ABCD4	0.0115777	0.149902	0.256	0.144	1	ABCD4	1.93638
NDUFA4	0.0115868	0.14779	0.955	0.888	1	NDUFA4	1.93604
HLA-F	0.0116679	0.196754	0.962	0.882	1	HLA-F	1.93301
NUDCD3	0.0117454	0.136228	0.188	0.091	1	NUDCD3	1.93013
CTR9	0.0119837	0.152439	0.338	0.209	1	CTR9	1.92141
KTI12	0.0120233	-0.153358	0.068	0.16	1	KTI12	1.91998
LYSMD3	0.0120382	-0.143258	0.053	0.139	1	LYSMD3	1.91944
MAT2B	0.0122289	0.173227	0.414	0.289	1	MAT2B	1.91261
ELOC	0.0122917	0.17526	0.564	0.428	1	ELOC	1.91039
CELF2	0.0124353	-0.189248	0.511	0.631	1	CELF2	1.90534
UPP1	0.0124835	-0.225812	0.586	0.695	1	UPP1	1.90366
PARG	0.0126359	0.125316	0.158	0.07	1	PARG	1.89839
ZNF121	0.0129077	-0.124232	0.045	0.128	1	ZNF121	1.88915
SEC11A	0.01294	0.162682	0.722	0.626	1	SEC11A	1.88807
MYBL1	0.0132388	-0.101197	0.06	0.15	1	MYBL1	1.87815
NFAT5	0.0134433	0.160322	0.391	0.257	1	NFAT5	1.87149
EIF1B	0.0134538	-0.187346	0.519	0.626	1	EIF1B	1.87115
RAB4A	0.0135903	0.22495	0.293	0.193	1	RAB4A	1.86677
BCOR	0.0136271	-0.104883	0.03	0.102	1	BCOR	1.8656
44083	0.0136309	-0.196775	0.571	0.706	1	44083	1.86548
RPS3A	0.0136591	-0.0964329	1	1	1	RPS3A	1.86458
RFLNB	0.0138382	-0.183001	0.211	0.337	1	RFLNB	1.85892
DESI1	0.0138709	0.146693	0.331	0.209	1	DESI1	1.8579
TRAPPC1	0.0139772	0.162871	0.744	0.642	1	TRAPPC1	1.85458
MYO1C	0.0139898	0.091392	0.15	0.064	1	MYO1C	1.85419
APEX1	0.0139978	-0.141474	0.248	0.385	1	APEX1	1.85394
STAT1	0.0140362	0.318833	0.609	0.519	1	STAT1	1.85275
IP6K2	0.0141928	0.206606	0.331	0.219	1	IP6K2	1.84793
THOC5	0.0145775	-0.142323	0.038	0.112	1	THOC5	1.83632
RNGTT	0.0146252	0.121647	0.203	0.102	1	RNGTT	1.8349
LDHA	0.0146682	0.143624	0.917	0.882	1	LDHA	1.83362
OSGEP	0.0150054	0.14576	0.188	0.096	1	OSGEP	1.82375
C11orf68	0.01521	0.151045	0.203	0.107	1	C11orf68	1.81787
PYROXD1	0.0152153	0.147984	0.278	0.16	1	PYROXD1	1.81772
SF3B2	0.0152899	0.180214	0.602	0.497	1	SF3B2	1.81559
RAB33A	0.0154553	-0.178	0.195	0.31	1	RAB33A	1.81092
MZB1	0.0157385	0.119313	0.113	0.043	1	MZB1	1.80304
RALGDS	0.0157946	-0.164193	0.233	0.38	1	RALGDS	1.80149
SLC4A7	0.0158788	0.151058	0.376	0.251	1	SLC4A7	1.79918
MT-ND2	0.0159921	-0.118461	0.985	1	1	MT-ND2	1.7961
LSM7	0.0162203	0.159265	0.654	0.561	1	LSM7	1.78994
FAHD1	0.0162376	-0.101934	0.06	0.15	1	FAHD1	1.78948
CEP95	0.0162668	-0.145483	0.045	0.123	1	CEP95	1.7887
NCBP2-AS2	0.0163197	-0.15528	0.135	0.241	1	NCBP2-AS2	1.78729
SLC25A33	0.0163366	-0.105609	0.038	0.112	1	SLC25A33	1.78684
OGFOD2	0.0164275	0.100016	0.105	0.037	1	OGFOD2	1.78443
GNPTG	0.0166618	0.138897	0.18	0.091	1	GNPTG	1.77828
ARHGEF9	0.0167222	-0.123422	0.053	0.134	1	ARHGEF9	1.77671
DCUN1D5	0.0167233	0.121946	0.278	0.16	1	DCUN1D5	1.77668
MYL12B	0.0168435	0.099015	0.977	0.979	1	MYL12B	1.77357
AGO2	0.0168548	-0.192152	0.195	0.299	1	AGO2	1.77328
BLZF1	0.017018	0.141887	0.173	0.086	1	BLZF1	1.76909
SOS1	0.0170345	0.13603	0.353	0.235	1	SOS1	1.76867
FAM129A	0.0172601	-0.163927	0.474	0.61	1	FAM129A	1.76296
EXOSC1	0.0173314	0.160424	0.459	0.332	1	EXOSC1	1.76117
ARID1B	0.0173365	-0.184159	0.421	0.588	1	ARID1B	1.76104
ATP6V0A1	0.0175978	0.151965	0.15	0.07	1	ATP6V0A1	1.75454
TBC1D22A	0.0176092	0.178591	0.211	0.118	1	TBC1D22A	1.75426
REC8	0.0176285	0.159022	0.135	0.059	1	REC8	1.75379
CHMP2A	0.0177667	0.173043	0.759	0.615	1	CHMP2A	1.75039
SELENOW	0.0177823	-0.175995	0.481	0.62	1	SELENOW	1.75001
IKBKE	0.0180662	0.203984	0.391	0.289	1	IKBKE	1.74313
CAPG	0.0181735	0.187305	0.331	0.225	1	CAPG	1.74056
ZNF644	0.0182815	0.1529	0.406	0.278	1	ZNF644	1.73799
SSR2	0.0182869	-0.155257	0.752	0.813	1	SSR2	1.73786
CHMP5	0.018343	0.191281	0.489	0.374	1	CHMP5	1.73653
SLC2A1	0.0183799	-0.113161	0.06	0.144	1	SLC2A1	1.73566
ASTE1	0.0185908	0.124398	0.135	0.059	1	ASTE1	1.7307
GPATCH2	0.0192837	-0.14555	0.12	0.219	1	GPATCH2	1.71481
MT-CO1	0.0193244	-0.0665719	1	1	1	MT-CO1	1.71389
MED25	0.0193746	0.114097	0.165	0.08	1	MED25	1.71277
NDUFB7	0.0196068	0.133646	0.707	0.663	1	NDUFB7	1.70759
IRF9	0.0198191	0.172162	0.338	0.225	1	IRF9	1.70292
SOD1	0.0199091	0.144876	0.932	0.92	1	SOD1	1.70095
CCM2	0.0200685	-0.156693	0.617	0.727	1	CCM2	1.69748
NIPSNAP2	0.0200879	0.146936	0.188	0.096	1	NIPSNAP2	1.69706
NNT	0.0201019	-0.131551	0.098	0.193	1	NNT	1.69676
PUF60	0.0201473	-0.165214	0.308	0.439	1	PUF60	1.69578
TTC21B	0.0202809	-0.130669	0.038	0.107	1	TTC21B	1.69291
LARP7	0.0204378	-0.168057	0.263	0.396	1	LARP7	1.68957
METTL5	0.0205113	-0.118348	0.271	0.406	1	METTL5	1.68801
WDR75	0.0206106	-0.104495	0.053	0.134	1	WDR75	1.68591
TMEM11	0.0206831	0.126871	0.248	0.144	1	TMEM11	1.68438
PTGER2	0.0206905	-0.203572	0.293	0.417	1	PTGER2	1.68423
TLR1	0.0209248	0.098983	0.128	0.053	1	TLR1	1.67934
RPL7A	0.021036	-0.0767502	1	1	1	RPL7A	1.67704
YIPF1	0.0211501	0.101119	0.143	0.064	1	YIPF1	1.67469
ABCA7	0.0215824	-0.122844	0.045	0.118	1	ABCA7	1.6659
ANKRD39	0.0216359	0.168794	0.248	0.15	1	ANKRD39	1.66482
ERCC6	0.021786	0.0833624	0.128	0.053	1	ERCC6	1.66182
KDM5C	0.0218528	-0.118772	0.075	0.16	1	KDM5C	1.66049
SPTBN1	0.0218898	0.186449	0.429	0.321	1	SPTBN1	1.65976
ZNRF1	0.0220023	0.190121	0.293	0.187	1	ZNRF1	1.65753
DDX60L	0.0220044	0.182144	0.263	0.155	1	DDX60L	1.65749
NUBP1	0.0220617	0.143914	0.271	0.166	1	NUBP1	1.65636
CEACAM1	0.0224146	0.170122	0.398	0.278	1	CEACAM1	1.64947
CSGALNACT2	0.0224663	0.122359	0.248	0.15	1	CSGALNACT2	1.64847
JUN	0.0225327	0.221218	0.466	0.348	1	JUN	1.64719
CERS4	0.0226828	0.120016	0.15	0.07	1	CERS4	1.6443
SLC20A2	0.0226864	-0.0676679	0.06	0.144	1	SLC20A2	1.64423
GXYLT1	0.0228833	0.142311	0.135	0.064	1	GXYLT1	1.64048
SHMT2	0.0229728	0.201695	0.436	0.348	1	SHMT2	1.63879
TRMU	0.0231693	0.141087	0.12	0.053	1	TRMU	1.63509
COX20	0.0233835	0.166453	0.398	0.278	1	COX20	1.63109
USE1	0.0234585	0.165822	0.376	0.267	1	USE1	1.6297
FBXW11	0.023647	-0.159642	0.105	0.198	1	FBXW11	1.62622
ARL5A	0.0237172	0.128568	0.195	0.107	1	ARL5A	1.62494
BBIP1	0.0238291	-0.123548	0.098	0.193	1	BBIP1	1.62289
GSS	0.0238457	-0.136297	0.09	0.176	1	GSS	1.62259
HAUS6	0.0240168	0.121762	0.173	0.086	1	HAUS6	1.61949
IFI6	0.0240678	0.369113	0.429	0.348	1	IFI6	1.61856
UQCR11	0.0240769	0.152993	0.812	0.695	1	UQCR11	1.6184
TTC3	0.0241324	-0.177006	0.376	0.513	1	TTC3	1.6174
SS18L2	0.0241737	-0.178186	0.398	0.508	1	SS18L2	1.61666
NDUFS2	0.0241782	0.161096	0.496	0.385	1	NDUFS2	1.61658
TTI1	0.0242836	-0.111662	0.045	0.118	1	TTI1	1.61469
GALK1	0.0243712	0.13921	0.18	0.096	1	GALK1	1.61312
ZNF408	0.0244268	-0.105098	0.053	0.128	1	ZNF408	1.61213
TTF2	0.0244339	-0.157147	0.075	0.16	1	TTF2	1.61201
FYN	0.0245101	-0.176818	0.624	0.722	1	FYN	1.61065
RPS14	0.0245841	-0.0701393	1	1	1	RPS14	1.60935
RTN3	0.0247205	-0.114433	0.233	0.358	1	RTN3	1.60694
PICALM	0.0248284	0.170607	0.338	0.23	1	PICALM	1.60505
UBA52	0.0248591	-0.103705	0.992	1	1	UBA52	1.60451
PSME2	0.0251336	0.198864	0.835	0.877	1	PSME2	1.59975
MATR3.1	0.0251398	0.0843091	0.15	0.07	1	MATR3.1	1.59964
MLH1	0.0251558	0.125112	0.113	0.048	1	MLH1	1.59936
NANS	0.0251925	0.175416	0.383	0.267	1	NANS	1.59873
MPND	0.0251947	-0.104683	0.053	0.128	1	MPND	1.59869
TYMP	0.0254432	0.226521	0.481	0.396	1	TYMP	1.59443
CBFB	0.0255388	-0.130854	0.203	0.326	1	CBFB	1.5928
RPS6	0.0255786	-0.0970841	1	1	1	RPS6	1.59212
RPL35A	0.0258223	-0.0958887	1	1	1	RPL35A	1.588
HNRNPAB	0.02586	0.179269	0.376	0.278	1	HNRNPAB	1.58737
RRAS	0.0259585	0.143038	0.15	0.075	1	RRAS	1.58572
CCDC186	0.0260572	0.120203	0.459	0.337	1	CCDC186	1.58407
REXO4	0.0260713	0.184403	0.233	0.15	1	REXO4	1.58384
SURF6	0.0260749	-0.0918894	0.045	0.118	1	SURF6	1.58378
B4GALT3	0.0262344	-0.14304	0.195	0.305	1	B4GALT3	1.58113
ZNF274	0.0262558	0.113362	0.211	0.118	1	ZNF274	1.58077
IL12RB1	0.0264328	0.139269	0.293	0.187	1	IL12RB1	1.57786
WDR7	0.0268922	0.113531	0.15	0.075	1	WDR7	1.57037
SIRT1	0.0271953	-0.138723	0.053	0.123	1	SIRT1	1.56551
TSPOAP1-AS1	0.0274004	-0.102693	0.068	0.15	1	TSPOAP1-AS1	1.56224
SERPINB9	0.0274749	-0.123615	0.241	0.364	1	SERPINB9	1.56106
CD96	0.0275887	-0.178813	0.278	0.39	1	CD96	1.55927
CBX7	0.027651	-0.100486	0.12	0.225	1	CBX7	1.55829
ITGB2-AS1	0.0277831	-0.14529	0.098	0.182	1	ITGB2-AS1	1.55622
VPS37A	0.0279745	0.110987	0.203	0.112	1	VPS37A	1.55324
CD226	0.0282829	-0.186269	0.226	0.348	1	CD226	1.54848
MIR4435-2HG	0.0283075	0.177865	0.549	0.444	1	MIR4435-2HG	1.5481
TRIM22	0.0283076	-0.144135	0.489	0.588	1	TRIM22	1.5481
ARPC5	0.0284806	0.161492	0.82	0.749	1	ARPC5	1.54545
VPS50	0.0285165	0.124338	0.158	0.08	1	VPS50	1.5449
KCTD18	0.0285287	0.0875349	0.105	0.043	1	KCTD18	1.54472
SSB	0.0287061	0.15445	0.647	0.535	1	SSB	1.54203
PILRB	0.0288287	-0.110998	0.06	0.134	1	PILRB	1.54018
PELP1	0.0288663	0.117877	0.113	0.048	1	PELP1	1.53961
NUMA1	0.0291685	-0.179788	0.323	0.406	1	NUMA1	1.53509
CYB5B	0.0291724	-0.119502	0.233	0.358	1	CYB5B	1.53503
TUBA1B	0.0292664	0.174427	0.632	0.481	1	TUBA1B	1.53363
RAB10	0.0293235	0.209053	0.496	0.396	1	RAB10	1.53278
STAT3	0.0296571	0.141192	0.632	0.503	1	STAT3	1.52787
SLC39A8	0.0299736	-0.100816	0.068	0.15	1	SLC39A8	1.52326
FBXO44	0.0299786	0.0884538	0.105	0.043	1	FBXO44	1.52319
IKBIP	0.0302696	0.114701	0.301	0.187	1	IKBIP	1.51899
ARFGEF1	0.0303992	0.186298	0.376	0.262	1	ARFGEF1	1.51714
MRPL20	0.0307305	-0.139739	0.556	0.658	1	MRPL20	1.51243
AL139246.5	0.0309442	-0.131106	0.053	0.123	1	AL139246.5	1.50942
RALGAPA2	0.03106	0.0958584	0.128	0.059	1	RALGAPA2	1.5078
RNF213	0.0312126	0.139735	0.895	0.861	1	RNF213	1.50567
TAP1	0.0315851	0.182757	0.669	0.561	1	TAP1	1.50052
PLAA	0.0317539	-0.121937	0.06	0.134	1	PLAA	1.4982
NDUFS3	0.0317959	0.138229	0.383	0.267	1	NDUFS3	1.49763
CARHSP1	0.031855	0.175996	0.511	0.433	1	CARHSP1	1.49682
FCHSD2	0.0319147	0.101937	0.143	0.07	1	FCHSD2	1.49601
PRMT2	0.0320967	-0.155749	0.534	0.679	1	PRMT2	1.49354
POMC	0.032165	0.108323	0.113	0.048	1	POMC	1.49262
RBBP5	0.0323265	-0.111496	0.075	0.155	1	RBBP5	1.49044
GNB5	0.0326126	-0.137905	0.173	0.278	1	GNB5	1.48661
PDE3B	0.0327269	-0.183838	0.489	0.583	1	PDE3B	1.4851
RABEP1	0.0327421	0.0969043	0.308	0.198	1	RABEP1	1.48489
WDFY1	0.0328091	0.140802	0.173	0.096	1	WDFY1	1.48401
GGA3	0.03286	0.0974643	0.128	0.059	1	GGA3	1.48333
SAMD9L	0.0330708	0.183471	0.526	0.406	1	SAMD9L	1.48056
CCDC32	0.0330937	0.121902	0.398	0.289	1	CCDC32	1.48025
RPA3	0.0331274	0.202996	0.459	0.364	1	RPA3	1.47981
MRPS12	0.0331468	-0.111701	0.391	0.513	1	MRPS12	1.47956
ITGB3BP	0.0335261	0.0910169	0.12	0.053	1	ITGB3BP	1.47462
SNX2	0.0337501	0.102328	0.383	0.283	1	SNX2	1.47172
RSRC1	0.0338637	0.199974	0.316	0.219	1	RSRC1	1.47027
RNASEL	0.0340907	-0.112324	0.053	0.123	1	RNASEL	1.46736
ECPAS	0.034109	0.119154	0.128	0.059	1	ECPAS	1.46713
MYO1G	0.0342305	0.160376	0.684	0.572	1	MYO1G	1.46559
PSMD3	0.0344021	-0.129062	0.195	0.305	1	PSMD3	1.46342
RABL2B	0.0345026	-0.107898	0.053	0.123	1	RABL2B	1.46215
SMAD4	0.0346044	0.149828	0.241	0.15	1	SMAD4	1.46087
LUC7L3	0.0347973	-0.175851	0.677	0.754	1	LUC7L3	1.45845
CAPRIN2	0.0348465	-0.0772729	0.038	0.102	1	CAPRIN2	1.45784
SAMD4B	0.0349306	-0.131668	0.075	0.15	1	SAMD4B	1.45679
UTP6	0.0351952	0.202594	0.278	0.198	1	UTP6	1.45352
FIS1	0.0352263	0.132136	0.677	0.583	1	FIS1	1.45313
INIP	0.0352521	-0.107683	0.09	0.176	1	INIP	1.45281
STX17	0.0352651	0.109963	0.203	0.118	1	STX17	1.45266
COMTD1	0.0353045	0.156965	0.263	0.171	1	COMTD1	1.45217
GDAP2	0.0353115	-0.0861041	0.038	0.102	1	GDAP2	1.45208
RPL39	0.0354475	-0.0760192	1	1	1	RPL39	1.45041
RELL2	0.0354995	-0.124822	0.075	0.15	1	RELL2	1.44978
LINC00667	0.0357131	-0.138409	0.105	0.193	1	LINC00667	1.44717
ZNF688	0.03576	-0.124229	0.18	0.283	1	ZNF688	1.4466
CCDC28A	0.0359462	0.104144	0.301	0.193	1	CCDC28A	1.44435
PPP6R1	0.0362389	0.136622	0.323	0.225	1	PPP6R1	1.44082
PSMB1	0.0368401	0.134478	0.895	0.84	1	PSMB1	1.43368
MLF2	0.0371366	-0.129762	0.248	0.348	1	MLF2	1.4302
USP16	0.0373149	0.199792	0.466	0.374	1	USP16	1.42812
NCK1	0.0373222	-0.14734	0.346	0.465	1	NCK1	1.42803
GALNT2	0.0373525	0.0923249	0.143	0.07	1	GALNT2	1.42768
STT3B	0.0374474	-0.155402	0.248	0.358	1	STT3B	1.42658
INTS8	0.0374505	-0.147296	0.128	0.214	1	INTS8	1.42654
FOXJ3	0.0376202	-0.0947751	0.06	0.134	1	FOXJ3	1.42458
WDFY2	0.0378466	0.145601	0.18	0.102	1	WDFY2	1.42197
ZNF397	0.0380493	-0.0608753	0.06	0.134	1	ZNF397	1.41965
DAXX	0.0381064	0.135321	0.293	0.198	1	DAXX	1.419
TIMM13	0.0382748	0.119434	0.383	0.262	1	TIMM13	1.41709
LINC02001	0.0383514	0.122291	0.158	0.086	1	LINC02001	1.41622
DIP2A	0.0384534	-0.17647	0.293	0.39	1	DIP2A	1.41507
NUDT4	0.0389582	-0.106463	0.105	0.198	1	NUDT4	1.4094
PTPRE	0.0389852	-0.127815	0.135	0.225	1	PTPRE	1.4091
MRPL22	0.039164	0.157993	0.338	0.257	1	MRPL22	1.40711
PDCD10	0.0392257	0.136138	0.549	0.46	1	PDCD10	1.40643
MAFG	0.039303	0.113426	0.18	0.102	1	MAFG	1.40557
BSG	0.0397622	-0.146902	0.361	0.46	1	BSG	1.40053
NIFK-AS1	0.0398108	0.136691	0.188	0.112	1	NIFK-AS1	1.4
N4BP2L2	0.0398173	-0.160927	0.827	0.856	1	N4BP2L2	1.39993
RALA	0.0398413	0.186965	0.421	0.337	1	RALA	1.39967
SELENOF	0.0400373	0.108966	0.632	0.503	1	SELENOF	1.39753
FBXO6	0.0401316	0.119576	0.15	0.08	1	FBXO6	1.39651
PDE4DIP	0.0401669	-0.0915466	0.143	0.235	1	PDE4DIP	1.39613
TMEM14A	0.040204	0.0943648	0.248	0.15	1	TMEM14A	1.39573
POU2F2	0.0402366	-0.22625	0.436	0.54	1	POU2F2	1.39538
CYBC1	0.0403545	0.179608	0.474	0.364	1	CYBC1	1.39411
BCL2L13	0.0403741	0.0795699	0.135	0.064	1	BCL2L13	1.3939
GBP1	0.0406981	0.163349	0.511	0.385	1	GBP1	1.39043
RBM17	0.0408324	0.168821	0.489	0.358	1	RBM17	1.389
METTL16	0.0409838	-0.119007	0.075	0.15	1	METTL16	1.38739
ABHD17A	0.0409989	-0.150523	0.684	0.759	1	ABHD17A	1.38723
SP3	0.0414038	0.145349	0.338	0.241	1	SP3	1.38296
KANSL1	0.0418382	-0.151733	0.459	0.572	1	KANSL1	1.37843
PCNX1	0.0418647	0.111648	0.248	0.155	1	PCNX1	1.37815
METTL13	0.0418884	0.12208	0.165	0.091	1	METTL13	1.37791
ZNF160	0.0419909	-0.107459	0.06	0.128	1	ZNF160	1.37685
GRAP2	0.0420388	0.175938	0.271	0.187	1	GRAP2	1.37635
GLIPR2	0.0421808	0.168628	0.338	0.241	1	GLIPR2	1.37489
RPL3	0.0422677	-0.0932858	1	1	1	RPL3	1.37399
NSA2	0.0422734	0.146865	0.759	0.674	1	NSA2	1.37393
SETD2	0.0423634	-0.182798	0.301	0.39	1	SETD2	1.37301
HIF1AN	0.0424201	-0.131009	0.083	0.155	1	HIF1AN	1.37243
CLPTM1	0.0425223	0.11716	0.188	0.107	1	CLPTM1	1.37138
WSB2	0.0425532	0.0859548	0.211	0.123	1	WSB2	1.37107
TUT4	0.0425948	-0.15724	0.368	0.487	1	TUT4	1.37064
PCNT	0.0427198	-0.101448	0.09	0.171	1	PCNT	1.36937
NCOA4	0.0427319	0.179557	0.338	0.241	1	NCOA4	1.36925
CLK3	0.0427344	0.104003	0.218	0.128	1	CLK3	1.36922
KLHL5	0.0431243	0.105556	0.158	0.086	1	KLHL5	1.36528
RPS5	0.0432095	-0.0935647	1	1	1	RPS5	1.36442
RPLP2	0.0434	-0.0707061	1	1	1	RPLP2	1.36251
LCORL	0.0434373	-0.102375	0.06	0.128	1	LCORL	1.36214
RPS2	0.0434637	-0.0852485	1	1	1	RPS2	1.36187
EIF3E	0.0435769	-0.103617	0.917	0.904	1	EIF3E	1.36074
OASL	0.0436851	0.0888439	0.15	0.075	1	OASL	1.35967
PDE4D	0.0439116	0.0843633	0.218	0.128	1	PDE4D	1.35742
MX1	0.0441613	0.194194	0.414	0.326	1	MX1	1.35496
NSD3	0.0444686	-0.119795	0.767	0.84	1	NSD3	1.35195
MFNG	0.0444813	-0.144289	0.331	0.428	1	MFNG	1.35182
MRPL43	0.0446076	0.125131	0.451	0.332	1	MRPL43	1.35059
S100A4	0.0447532	0.114758	1	0.989	1	S100A4	1.34918
MIR3142HG	0.0448724	-0.216457	0.195	0.278	1	MIR3142HG	1.34802
RPS23	0.0451463	-0.0806875	1	1	1	RPS23	1.34538
NCOA6	0.0452192	0.102641	0.15	0.08	1	NCOA6	1.34468
NOP10	0.0454288	0.138429	0.759	0.754	1	NOP10	1.34267
NDUFS1	0.0459288	0.107085	0.278	0.182	1	NDUFS1	1.33791
FASTKD2	0.0461986	-0.108267	0.06	0.128	1	FASTKD2	1.33537
RPL10A	0.0462088	-0.0895988	1	1	1	RPL10A	1.33528
ARPC3	0.0463427	0.108743	0.992	0.979	1	ARPC3	1.33402
NDUFA8	0.046369	0.164773	0.308	0.225	1	NDUFA8	1.33377
DNAJC8	0.0464762	-0.110656	0.617	0.727	1	DNAJC8	1.33277
SNX5	0.0464914	0.155857	0.534	0.412	1	SNX5	1.33263
ADSL	0.0465139	0.0962583	0.143	0.075	1	ADSL	1.33242
ANKRD13A	0.0465562	-0.0896446	0.113	0.203	1	ANKRD13A	1.33202
SZRD1	0.0468113	0.183334	0.338	0.251	1	SZRD1	1.32965
NXT1	0.0469412	-0.146854	0.15	0.241	1	NXT1	1.32845
COQ9	0.0469442	-0.108014	0.053	0.118	1	COQ9	1.32842
VCPKMT	0.046996	0.0955617	0.12	0.059	1	VCPKMT	1.32794
TSPYL2	0.0472178	-0.117421	0.053	0.118	1	TSPYL2	1.32589
EVL	0.0473763	-0.106928	0.88	0.909	1	EVL	1.32444
CD74	0.047507	0.132863	0.962	0.888	1	CD74	1.32324
EDEM3	0.0475494	-0.101387	0.09	0.166	1	EDEM3	1.32285
PRDX6	0.0475623	0.17283	0.526	0.449	1	PRDX6	1.32274
MTDH	0.0476064	0.181234	0.789	0.695	1	MTDH	1.32233
SCAMP1	0.0478491	0.0978379	0.12	0.059	1	SCAMP1	1.32013
CHFR	0.047869	0.0915092	0.165	0.091	1	CHFR	1.31995
BTBD10	0.0479272	0.11316	0.135	0.07	1	BTBD10	1.31942
TADA3	0.0481286	0.0893604	0.541	0.406	1	TADA3	1.3176
HPS3	0.048249	-0.137226	0.09	0.166	1	HPS3	1.31651
RFXAP	0.0483257	0.0986163	0.128	0.064	1	RFXAP	1.31582
ANKRD17	0.0483669	-0.12975	0.165	0.262	1	ANKRD17	1.31545
MAN2A1	0.0484594	-0.110006	0.098	0.176	1	MAN2A1	1.31462
MED7	0.048602	-0.10756	0.09	0.166	1	MED7	1.31335
CCDC107	0.0486382	0.168473	0.594	0.508	1	CCDC107	1.31302
TSPAN14	0.0489272	-0.106899	0.346	0.481	1	TSPAN14	1.31045
STAG2	0.0489491	-0.120655	0.361	0.487	1	STAG2	1.31026
SENP6	0.049305	0.149149	0.391	0.289	1	SENP6	1.30711
GID8	0.0493503	-0.100062	0.143	0.23	1	GID8	1.30671
FBXO42	0.0493639	0.123729	0.113	0.053	1	FBXO42	1.30659
CCNG2	0.0494121	0.125969	0.233	0.15	1	CCNG2	1.30617
HIBCH	0.0494269	0.13168	0.301	0.209	1	HIBCH	1.30604
TRPV2	0.0494468	0.124064	0.218	0.134	1	TRPV2	1.30586
RNF41	0.0496148	-0.128939	0.098	0.176	1	RNF41	1.30439
IER3IP1	0.0496767	-0.131622	0.248	0.353	1	IER3IP1	1.30385
TMEM42	0.0498686	-0.106914	0.083	0.155	1	TMEM42	1.30217
NDUFA9	0.0499249	-0.109667	0.218	0.326	1	NDUFA9	1.30168
NECAB3	0.0499819	-0.0744292	0.045	0.107	1	NECAB3	1.30119
RNF187	0.0500314	0.104483	0.383	0.278	1	RNF187	1.30076
RIOK1	0.050656	-0.0544368	0.113	0.209	1	RIOK1	1.29537
NCAPD2	0.0508401	0.0869146	0.15	0.08	1	NCAPD2	1.29379
PAPOLA	0.050868	0.127115	0.692	0.572	1	PAPOLA	1.29356
ENOSF1	0.0512038	-0.0808594	0.045	0.107	1	ENOSF1	1.2907
POLDIP3	0.0512189	0.106222	0.158	0.086	1	POLDIP3	1.29057
BTBD1	0.0512437	-0.0902437	0.068	0.139	1	BTBD1	1.29036
EEF1A1	0.0512543	-0.0658279	1	1	1	EEF1A1	1.29027
KAT6A	0.0513529	-0.185384	0.301	0.401	1	KAT6A	1.28943
MPHOSPH6	0.0513988	0.106265	0.263	0.166	1	MPHOSPH6	1.28905
AKAP10	0.0516366	-0.119167	0.083	0.155	1	AKAP10	1.28704
ELOA	0.0516847	0.120089	0.233	0.144	1	ELOA	1.28664
REXO2	0.0517553	0.132913	0.797	0.733	1	REXO2	1.28605
PHYKPL	0.0518067	-0.156427	0.241	0.326	1	PHYKPL	1.28561
STX18	0.0518933	-0.109876	0.083	0.155	1	STX18	1.28489
TRERF1	0.0518971	0.143297	0.105	0.048	1	TRERF1	1.28486
GLRX5	0.0523961	-0.127913	0.331	0.455	1	GLRX5	1.2807
SNAPIN	0.0524059	0.15105	0.241	0.16	1	SNAPIN	1.28062
RPL14	0.052436	-0.0697833	1	1	1	RPL14	1.28037
SPTAN1	0.052667	0.122946	0.556	0.428	1	SPTAN1	1.27846
VPS37B	0.0528469	-0.121792	0.053	0.112	1	VPS37B	1.27698
SERPINB1	0.0528659	0.15737	0.677	0.567	1	SERPINB1	1.27682
CSTF1	0.0530543	0.11176	0.211	0.128	1	CSTF1	1.27528
YBEY	0.0530543	-0.152718	0.12	0.193	1	YBEY	1.27528
NQO1	0.053232	0.0831996	0.105	0.048	1	NQO1	1.27383
RANBP2	0.0532853	-0.138284	0.203	0.289	1	RANBP2	1.27339
COPS4	0.053426	-0.137203	0.165	0.257	1	COPS4	1.27225
ZFX	0.0535892	-0.1549	0.256	0.353	1	ZFX	1.27092
BCL3	0.0536354	0.0787537	0.158	0.086	1	BCL3	1.27055
PLEKHF2	0.0539097	0.0932576	0.158	0.086	1	PLEKHF2	1.26833
HLA-DRB1	0.0540558	0.11045	0.872	0.866	1	HLA-DRB1	1.26716
RANBP1	0.0540891	0.122909	0.541	0.449	1	RANBP1	1.26689
SLC35D2	0.0541579	0.139485	0.398	0.31	1	SLC35D2	1.26634
PML	0.054219	0.145335	0.278	0.193	1	PML	1.26585
CHURC1	0.054247	0.111316	0.677	0.583	1	CHURC1	1.26562
ARID5A	0.0547512	0.119757	0.609	0.497	1	ARID5A	1.26161
CCT2	0.0548334	0.115619	0.429	0.326	1	CCT2	1.26095
EXOC6	0.0549431	0.0880921	0.18	0.102	1	EXOC6	1.26009
GPBP1	0.0549572	0.18075	0.707	0.61	1	GPBP1	1.25998
PANK3	0.0550274	-0.102566	0.053	0.112	1	PANK3	1.25942
TRMT112	0.0551996	0.127665	0.789	0.733	1	TRMT112	1.25806
RNF168	0.0554051	-0.171786	0.256	0.358	1	RNF168	1.25645
MCM5	0.0554407	0.0820021	0.128	0.064	1	MCM5	1.25617
SAMD9	0.0555446	0.160993	0.677	0.599	1	SAMD9	1.25536
CSTB	0.0556687	0.136992	0.827	0.77	1	CSTB	1.25439
SRP14	0.055803	0.096821	0.985	0.979	1	SRP14	1.25334
TIMM10B	0.0559956	0.102231	0.233	0.144	1	TIMM10B	1.25185
DCK	0.056148	-0.156071	0.429	0.519	1	DCK	1.25067
IL10RA	0.0563337	0.132409	0.842	0.802	1	IL10RA	1.24923
GOPC	0.0563481	-0.117587	0.15	0.241	1	GOPC	1.24912
UBA3	0.0565473	0.140721	0.233	0.155	1	UBA3	1.24759
TM2D3	0.0566367	0.129321	0.233	0.15	1	TM2D3	1.2469
BSDC1	0.0567732	0.0897653	0.301	0.198	1	BSDC1	1.24586
INTS4	0.0568399	0.117385	0.165	0.096	1	INTS4	1.24535
EEF1E1	0.0571901	0.151692	0.308	0.209	1	EEF1E1	1.24268
MT-CYB	0.0572325	-0.0722141	1	1	1	MT-CYB	1.24236
CHMP2B	0.0572497	0.123657	0.376	0.278	1	CHMP2B	1.24223
PHF11	0.0575826	0.163359	0.519	0.422	1	PHF11	1.23971
C19orf66	0.0577456	-0.116397	0.263	0.364	1	C19orf66	1.23848
HIVEP3	0.0583661	-0.0866986	0.098	0.176	1	HIVEP3	1.23384
PTGES3	0.058459	0.124737	0.865	0.802	1	PTGES3	1.23315
DBT	0.0584893	-0.107718	0.06	0.123	1	DBT	1.23292
AFF4	0.0585203	0.15837	0.248	0.176	1	AFF4	1.23269
PIGL	0.0588878	-0.106818	0.045	0.102	1	PIGL	1.22997
TSC1	0.0589268	-0.0912749	0.068	0.134	1	TSC1	1.22969
ZFP62	0.0589399	-0.1004	0.053	0.112	1	ZFP62	1.22959
GOLT1B	0.0589441	0.0871164	0.218	0.134	1	GOLT1B	1.22956
44075	0.0589954	-0.145675	0.444	0.567	1	44075	1.22918
CUTA	0.059058	-0.124575	0.556	0.663	1	CUTA	1.22872
VSIR	0.0591671	0.139605	0.466	0.38	1	VSIR	1.22792
SYNRG	0.0592882	-0.0906661	0.474	0.572	1	SYNRG	1.22703
MCM3	0.0594455	0.124233	0.248	0.166	1	MCM3	1.22588
RPS7	0.0595154	-0.0587935	1	1	1	RPS7	1.22537
TOR1AIP1	0.0595898	0.135892	0.338	0.246	1	TOR1AIP1	1.22483
ANKIB1	0.0596314	-0.137008	0.09	0.16	1	ANKIB1	1.22452
SNHG8	0.0597033	-0.17251	0.391	0.476	1	SNHG8	1.224
TTC13	0.0599533	-0.0931915	0.053	0.112	1	TTC13	1.22219
SMPD4	0.0599547	-0.0685093	0.045	0.102	1	SMPD4	1.22218
COX6A1	0.0600258	0.111393	0.85	0.856	1	COX6A1	1.22166
EP400	0.0601082	-0.0907663	0.083	0.155	1	EP400	1.22107
PPP2R5C	0.0605123	-0.168636	0.662	0.738	1	PPP2R5C	1.21816
PRMT1	0.060609	0.147507	0.466	0.374	1	PRMT1	1.21746
ZNF44	0.0609007	-0.108108	0.098	0.171	1	ZNF44	1.21538
RPL4	0.0610224	-0.0875061	0.992	0.989	1	RPL4	1.21451
PDAP1	0.0611012	0.151123	0.549	0.455	1	PDAP1	1.21395
TOPORS	0.0611932	-0.127589	0.195	0.299	1	TOPORS	1.2133
SDHAF3	0.0616676	-0.105969	0.158	0.246	1	SDHAF3	1.20994
UBC	0.0617021	0.119948	0.992	0.984	1	UBC	1.2097
SYTL1	0.0618724	-0.164742	0.421	0.497	1	SYTL1	1.2085
EDEM2	0.062518	0.0893933	0.18	0.107	1	EDEM2	1.20399
NFKBIA	0.0627638	0.187114	0.602	0.524	1	NFKBIA	1.20229
FANCA	0.0630805	-0.0906879	0.053	0.112	1	FANCA	1.2001
AATF	0.0630853	0.163729	0.466	0.385	1	AATF	1.20007
FBXW5	0.0631321	0.153843	0.541	0.455	1	FBXW5	1.19975
TXNDC17	0.063168	0.173345	0.496	0.401	1	TXNDC17	1.1995
RPL26	0.063255	-0.0745903	1	1	1	RPL26	1.1989
TM2D1	0.0634629	0.185033	0.429	0.353	1	TM2D1	1.19748
CSNK1D	0.0636073	-0.113165	0.218	0.321	1	CSNK1D	1.19649
GMFB	0.0636944	-0.0817444	0.113	0.198	1	GMFB	1.1959
USO1	0.0637849	-0.120329	0.188	0.283	1	USO1	1.19528
OTUD5	0.0638812	-0.160836	0.18	0.267	1	OTUD5	1.19463
AC078883.3	0.0640166	-0.0906603	0.068	0.134	1	AC078883.3	1.19371
PRDX1	0.0641872	0.106037	0.947	0.93	1	PRDX1	1.19255
UBE2I	0.0642416	0.0963635	0.744	0.674	1	UBE2I	1.19218
AQP3	0.0647884	0.184037	0.782	0.679	1	AQP3	1.1885
SLC52A2	0.0647938	0.122509	0.278	0.193	1	SLC52A2	1.18847
SH3GL1	0.0649751	-0.0805599	0.06	0.123	1	SH3GL1	1.18725
MTERF1	0.065033	0.106812	0.128	0.07	1	MTERF1	1.18687
H3F3A	0.0651072	0.0759597	0.992	1	1	H3F3A	1.18637
PCMTD2	0.0652105	-0.111088	0.09	0.16	1	PCMTD2	1.18568
CAMK2G	0.0653868	0.129879	0.211	0.134	1	CAMK2G	1.18451
PINK1	0.0655556	-0.0864993	0.075	0.144	1	PINK1	1.18339
TXN	0.0655606	0.167765	0.895	0.861	1	TXN	1.18336
TMEM218	0.0658194	0.106146	0.158	0.091	1	TMEM218	1.18165
SPCS3	0.0660622	-0.165292	0.481	0.572	1	SPCS3	1.18005
NKG7	0.0660981	0.331188	0.128	0.07	1	NKG7	1.17981
HTT	0.0662213	-0.107879	0.12	0.198	1	HTT	1.179
RAB5C	0.0664161	0.106566	0.444	0.348	1	RAB5C	1.17773
RAB28	0.0665533	-0.0864367	0.06	0.123	1	RAB28	1.17683
AMZ2	0.0665756	0.122452	0.173	0.107	1	AMZ2	1.17669
DCAF12	0.0667388	0.0888958	0.135	0.075	1	DCAF12	1.17562
ANXA7	0.0670381	0.125799	0.586	0.481	1	ANXA7	1.17368
CCSER2	0.0671675	-0.0977174	0.301	0.412	1	CCSER2	1.17284
ELAC2	0.0671869	0.0625119	0.143	0.075	1	ELAC2	1.17272
PDLIM2	0.0672252	-0.142528	0.368	0.476	1	PDLIM2	1.17247
BAG1	0.06738	0.137438	0.421	0.326	1	BAG1	1.17147
C6orf48	0.0675806	-0.0821915	0.383	0.503	1	C6orf48	1.17018
PDZD11	0.0676668	0.122617	0.271	0.182	1	PDZD11	1.16962
SMG5	0.0677214	0.127118	0.113	0.059	1	SMG5	1.16927
PECR	0.0677223	0.115658	0.143	0.08	1	PECR	1.16927
NOP14	0.0677562	0.0957037	0.188	0.112	1	NOP14	1.16905
B3GAT3	0.0677831	0.136621	0.368	0.278	1	B3GAT3	1.16888
THOC2	0.0682851	-0.115057	0.316	0.406	1	THOC2	1.16567
TCTEX1D2	0.0684146	0.110689	0.143	0.08	1	TCTEX1D2	1.16485
RNPEP	0.0685588	0.095185	0.165	0.096	1	RNPEP	1.16394
AGTRAP	0.0687147	-0.129743	0.165	0.251	1	AGTRAP	1.16295
TRIM8	0.0687593	-0.100172	0.135	0.219	1	TRIM8	1.16267
TIMM29	0.0691671	0.131501	0.233	0.16	1	TIMM29	1.1601
WSB1	0.0692102	-0.181604	0.436	0.54	1	WSB1	1.15983
TMEM263	0.0698993	-0.101353	0.113	0.193	1	TMEM263	1.15553
PDP1	0.0701272	0.122668	0.128	0.07	1	PDP1	1.15411
LIPA	0.0701734	-0.0718481	0.06	0.123	1	LIPA	1.15383
ALKBH5	0.0702964	0.120745	0.338	0.251	1	ALKBH5	1.15307
TCF7	0.0703336	-0.144437	0.293	0.401	1	TCF7	1.15284
ACSL4	0.0704657	-0.171869	0.158	0.235	1	ACSL4	1.15202
ZKSCAN1	0.070953	-0.120145	0.203	0.294	1	ZKSCAN1	1.14903
MRPL50	0.0710341	0.126471	0.338	0.246	1	MRPL50	1.14853
ATP5MD	0.0712483	0.1357	0.677	0.599	1	ATP5MD	1.14723
CCR4	0.0713684	0.136248	0.459	0.374	1	CCR4	1.14649
NT5C2	0.0714874	-0.0996428	0.075	0.139	1	NT5C2	1.14577
NCSTN	0.0716889	-0.0699668	0.053	0.112	1	NCSTN	1.14455
PSMD4	0.0724555	-0.0774517	0.406	0.54	1	PSMD4	1.13993
PMPCA	0.0726121	0.104147	0.211	0.134	1	PMPCA	1.13899
EIF3J	0.0727501	0.130681	0.451	0.342	1	EIF3J	1.13817
ZFAND5	0.07286	0.142834	0.316	0.23	1	ZFAND5	1.13751
CPTP	0.073058	0.0880818	0.143	0.08	1	CPTP	1.13633
ERGIC1	0.0732004	-0.0950585	0.09	0.16	1	ERGIC1	1.13549
GBP5	0.0732013	0.132641	0.662	0.626	1	GBP5	1.13548
ZNF430	0.0733653	-0.0999591	0.211	0.305	1	ZNF430	1.13451
CCDC91	0.0734527	-0.122631	0.301	0.385	1	CCDC91	1.13399
FBXL16	0.0734696	0.083994	0.18	0.107	1	FBXL16	1.13389
SMC3	0.0735023	-0.204722	0.556	0.62	1	SMC3	1.1337
RFK	0.0735537	-0.148503	0.165	0.241	1	RFK	1.1334
TCEA1	0.0735556	-0.148463	0.564	0.658	1	TCEA1	1.13338
MLLT11	0.0736286	-0.066605	0.045	0.102	1	MLLT11	1.13295
ZCCHC3	0.0736776	-0.109098	0.068	0.128	1	ZCCHC3	1.13266
FAM114A2	0.0739442	0.117566	0.173	0.107	1	FAM114A2	1.1311
HIST2H2AC	0.074159	-0.112081	0.06	0.118	1	HIST2H2AC	1.12984
KDM5A	0.0742697	0.157202	0.444	0.358	1	KDM5A	1.12919
AKAP9	0.0745374	0.0809179	0.692	0.599	1	AKAP9	1.12763
RARRES3	0.0745382	-0.0713499	0.962	0.952	1	RARRES3	1.12762
HMG20B	0.0746703	0.119962	0.256	0.176	1	HMG20B	1.12685
MAP4K4	0.0747015	0.111577	0.353	0.251	1	MAP4K4	1.12667
LY75	0.0747501	0.104778	0.128	0.07	1	LY75	1.12639
MHENCR	0.0750463	-0.113155	0.105	0.176	1	MHENCR	1.12467
MYADM	0.0750725	0.0974542	0.15	0.086	1	MYADM	1.12452
GOLGA7	0.0750746	-0.0906095	0.241	0.332	1	GOLGA7	1.12451
ZBTB44	0.0753099	0.180785	0.263	0.193	1	ZBTB44	1.12315
MAGT1	0.0753727	-0.085498	0.105	0.176	1	MAGT1	1.12279
MRPS21	0.0754085	0.125273	0.594	0.524	1	MRPS21	1.12258
ENO1	0.0754219	0.159848	0.94	0.941	1	ENO1	1.1225
POLE3	0.0754849	-0.129706	0.158	0.235	1	POLE3	1.12214
COPS8	0.0756438	0.119164	0.241	0.166	1	COPS8	1.12123
TFRC	0.0756861	0.112063	0.241	0.16	1	TFRC	1.12098
BID	0.0758032	0.0912472	0.391	0.289	1	BID	1.12031
FARSA	0.0758139	-0.105272	0.09	0.155	1	FARSA	1.12025
PRR13	0.0758812	-0.103158	0.624	0.668	1	PRR13	1.11987
ZNF197	0.075944	0.065246	0.128	0.07	1	ZNF197	1.11951
NETO2	0.0760289	0.164454	0.188	0.118	1	NETO2	1.11902
TPMT	0.0765061	-0.10273	0.113	0.187	1	TPMT	1.1163
SMARCAD1	0.0765471	0.0977095	0.15	0.086	1	SMARCAD1	1.11607
UBQLN2	0.0765517	0.161704	0.226	0.155	1	UBQLN2	1.11605
CHAMP1	0.0767572	0.0824072	0.12	0.064	1	CHAMP1	1.11488
EIF1	0.0767712	-0.0552758	1	1	1	EIF1	1.1148
COX6C	0.0768699	0.119186	0.865	0.877	1	COX6C	1.11424
CUL5	0.0770944	0.0950896	0.256	0.171	1	CUL5	1.11298
DNAJB9	0.0771092	-0.0976645	0.15	0.23	1	DNAJB9	1.11289
CPNE2	0.077175	0.111758	0.12	0.064	1	CPNE2	1.11252
IMP4	0.0771863	0.110006	0.233	0.155	1	IMP4	1.11246
COA6	0.0773035	0.0991756	0.368	0.262	1	COA6	1.1118
SDR39U1	0.0776616	-0.0985297	0.09	0.16	1	SDR39U1	1.10979
HECTD1	0.0780503	0.102562	0.353	0.262	1	HECTD1	1.10763
DCTN5	0.078159	-0.0684366	0.105	0.182	1	DCTN5	1.10702
PCID2	0.0782379	-0.101971	0.256	0.358	1	PCID2	1.10658
RETREG1	0.0785804	0.0962943	0.195	0.123	1	RETREG1	1.10469
NAA35	0.078584	-0.0916665	0.06	0.118	1	NAA35	1.10467
PSMD2	0.0788192	0.0747546	0.444	0.353	1	PSMD2	1.10337
MMD	0.0788646	0.101816	0.12	0.064	1	MMD	1.10312
UNC50	0.0793154	-0.134012	0.173	0.246	1	UNC50	1.10064
PRCC	0.0795825	0.102278	0.195	0.123	1	PRCC	1.09918
RRAGA	0.0796212	0.110226	0.338	0.246	1	RRAGA	1.09897
GTPBP10	0.0797207	0.106611	0.12	0.064	1	GTPBP10	1.09843
SOCS1	0.079729	-0.113438	0.549	0.652	1	SOCS1	1.09838
NBAS	0.0801489	-0.0511591	0.083	0.15	1	NBAS	1.0961
THG1L	0.0804551	0.0879121	0.128	0.07	1	THG1L	1.09445
NFATC3	0.0805299	-0.115398	0.18	0.267	1	NFATC3	1.09404
BUD23	0.0806396	-0.111487	0.248	0.337	1	BUD23	1.09345
LRBA	0.0806458	-0.0991858	0.278	0.374	1	LRBA	1.09342
AGPS	0.0809349	-0.119065	0.113	0.182	1	AGPS	1.09186
NUP43	0.0810335	-0.0814875	0.053	0.107	1	NUP43	1.09134
POLL	0.0810335	-0.0919376	0.053	0.107	1	POLL	1.09134
PPP1R7	0.0810501	0.117431	0.549	0.455	1	PPP1R7	1.09125
LRRC32	0.0810868	-0.123903	0.06	0.118	1	LRRC32	1.09105
HSDL2	0.0816583	-0.131952	0.143	0.214	1	HSDL2	1.088
ATP11C	0.0816839	0.0831677	0.105	0.053	1	ATP11C	1.08786
UBE2J2	0.0816947	-0.0366234	0.233	0.348	1	UBE2J2	1.08781
HIKESHI	0.0817864	0.163919	0.353	0.278	1	HIKESHI	1.08732
ZSWIM8	0.0818287	0.0858621	0.113	0.059	1	ZSWIM8	1.08709
FURIN	0.0820611	0.0729337	0.286	0.198	1	FURIN	1.08586
RTKN2	0.0822817	-0.163201	0.617	0.69	1	RTKN2	1.0847
MAPK14	0.0824464	0.101125	0.218	0.144	1	MAPK14	1.08383
EIF5	0.0826657	0.120165	0.692	0.615	1	EIF5	1.08267
CMC1	0.0826785	0.170643	0.368	0.283	1	CMC1	1.08261
CNOT6L	0.0830151	-0.116815	0.406	0.503	1	CNOT6L	1.08084
ITFG1	0.083186	-0.115852	0.165	0.241	1	ITFG1	1.07995
TRMT10B	0.0832729	-0.0937074	0.053	0.107	1	TRMT10B	1.0795
RNMT	0.08356	-0.113158	0.301	0.412	1	RNMT	1.078
ERN1	0.0840918	0.0674576	0.165	0.096	1	ERN1	1.07525
JARID2	0.0843162	-0.103196	0.083	0.144	1	JARID2	1.07409
MAVS	0.084395	0.133225	0.195	0.128	1	MAVS	1.07368
PSMA7	0.0844795	0.115341	0.947	0.92	1	PSMA7	1.07325
RYR1	0.0845913	0.0996896	0.113	0.059	1	RYR1	1.07267
ECHDC1	0.0846549	0.142852	0.308	0.235	1	ECHDC1	1.07235
FASTKD5	0.0847614	0.0814302	0.143	0.08	1	FASTKD5	1.0718
SMAD2	0.0848098	-0.130819	0.218	0.305	1	SMAD2	1.07155
PGK1	0.084857	0.102374	0.774	0.733	1	PGK1	1.07131
ZNF318	0.0849619	-0.0820993	0.06	0.118	1	ZNF318	1.07078
SPAST	0.0856244	-0.0732642	0.113	0.187	1	SPAST	1.0674
DNAJC21	0.0856369	0.173471	0.474	0.401	1	DNAJC21	1.06734
RB1CC1	0.0859523	-0.109671	0.271	0.364	1	RB1CC1	1.06574
EIF3M	0.0860009	-0.132881	0.556	0.615	1	EIF3M	1.0655
G3BP2	0.0861951	-0.163371	0.579	0.615	1	G3BP2	1.06452
LMBR1L	0.0863495	-0.0907203	0.12	0.193	1	LMBR1L	1.06374
PSMC5	0.0864911	0.107397	0.677	0.61	1	PSMC5	1.06303
ATF6B	0.0866374	-0.107252	0.263	0.353	1	ATF6B	1.06229
CAMKMT	0.0867123	0.0775936	0.113	0.059	1	CAMKMT	1.06192
USP53	0.086852	0.0837737	0.143	0.08	1	USP53	1.06122
LPAR2	0.0870665	0.145327	0.18	0.118	1	LPAR2	1.06015
AKAP8	0.0871	0.0671292	0.158	0.091	1	AKAP8	1.05998
BICDL1	0.0872483	-0.118183	0.218	0.299	1	BICDL1	1.05924
CEP120	0.0873338	-0.0938814	0.068	0.128	1	CEP120	1.05882
UBR3	0.0874299	-0.105857	0.053	0.107	1	UBR3	1.05834
RPS9	0.0874421	-0.0576715	1	1	1	RPS9	1.05828
CST7	0.0874835	-0.120482	0.188	0.278	1	CST7	1.05807
GNA15	0.0875443	-0.0960583	0.105	0.176	1	GNA15	1.05777
BOLA1	0.087596	0.0623771	0.165	0.096	1	BOLA1	1.05752
LSM8	0.0878316	-0.129895	0.541	0.642	1	LSM8	1.05635
DPP3	0.0878834	0.0948763	0.158	0.096	1	DPP3	1.05609
TRMT1	0.0886902	0.0996032	0.15	0.091	1	TRMT1	1.05212
NDUFAF3	0.0887206	0.114703	0.519	0.417	1	NDUFAF3	1.05198
NOC4L	0.088994	0.0821868	0.105	0.053	1	NOC4L	1.05064
MRPL28	0.08929	-0.122257	0.331	0.444	1	MRPL28	1.0492
NDUFB3	0.0893296	0.122489	0.639	0.561	1	NDUFB3	1.049
DYRK1A	0.0893833	0.0936617	0.286	0.193	1	DYRK1A	1.04874
SMARCC1	0.0894295	-0.0578448	0.323	0.428	1	SMARCC1	1.04852
RDH14	0.0897522	-0.119282	0.165	0.235	1	RDH14	1.04695
DENND6B	0.0897724	0.110274	0.226	0.15	1	DENND6B	1.04686
RAB5A	0.0897833	0.113738	0.271	0.198	1	RAB5A	1.0468
WDTC1	0.0899	-0.0626999	0.06	0.118	1	WDTC1	1.04624
MAP4K1	0.0900807	-0.165174	0.165	0.235	1	MAP4K1	1.04537
ARHGAP18	0.0901126	-0.0629261	0.083	0.15	1	ARHGAP18	1.04521
TKT	0.0905578	-0.13864	0.451	0.503	1	TKT	1.04307
DNAJC10	0.0907103	-0.0640319	0.098	0.171	1	DNAJC10	1.04234
TRIM26	0.0907877	-0.100076	0.083	0.144	1	TRIM26	1.04197
MSL3	0.0907991	0.145465	0.353	0.267	1	MSL3	1.04192
H2AFX	0.0909319	-0.0620305	0.113	0.182	1	H2AFX	1.04128
DCAF10	0.0911805	-0.0645901	0.09	0.16	1	DCAF10	1.0401
SUPT5H	0.0912552	0.0997153	0.316	0.225	1	SUPT5H	1.03974
A1BG	0.0915153	-0.122322	0.113	0.176	1	A1BG	1.03851
ZC3H12D	0.0915181	0.136746	0.256	0.182	1	ZC3H12D	1.03849
PSMB4	0.0915901	-0.149724	0.504	0.578	1	PSMB4	1.03815
ADRM1	0.0916323	-0.127947	0.361	0.449	1	ADRM1	1.03795
EMC4	0.0916965	0.153619	0.308	0.241	1	EMC4	1.03765
IDS	0.0917413	-0.133095	0.444	0.551	1	IDS	1.03744
C5orf15	0.0917652	-0.0742698	0.075	0.139	1	C5orf15	1.03732
ZBTB20	0.0918755	-0.159929	0.376	0.449	1	ZBTB20	1.0368
PGAM5	0.0922434	-0.0787697	0.053	0.107	1	PGAM5	1.03506
AASDHPPT	0.0925147	-0.0848822	0.143	0.225	1	AASDHPPT	1.03379
CNPPD1	0.0926225	0.0910302	0.233	0.155	1	CNPPD1	1.03328
FCHO1	0.092662	-0.100861	0.06	0.112	1	FCHO1	1.0331
SPATA13	0.0927447	-0.11406	0.241	0.321	1	SPATA13	1.03271
TMOD3	0.0929774	0.105636	0.541	0.465	1	TMOD3	1.03162
PGRMC1	0.0930714	0.126047	0.241	0.166	1	PGRMC1	1.03118
ID2	0.093103	-0.0122233	0.105	0.053	1	ID2	1.03104
HLA-DRA	0.0934388	0.1425	0.82	0.77	1	HLA-DRA	1.02947
SF3B5	0.0936852	0.116126	0.654	0.636	1	SF3B5	1.02833
ELK4	0.0939391	0.127407	0.301	0.219	1	ELK4	1.02715
EDF1	0.0946568	-0.107833	0.88	0.877	1	EDF1	1.02385
KDM7A	0.0946946	-0.117157	0.098	0.16	1	KDM7A	1.02367
VDAC1	0.0948397	0.144399	0.534	0.492	1	VDAC1	1.02301
ADA	0.0949686	-0.12601	0.068	0.123	1	ADA	1.02242
ZNF766	0.095045	-0.119645	0.173	0.262	1	ZNF766	1.02207
RPL23A	0.0950771	-0.0621785	1	1	1	RPL23A	1.02192
HSP90AA1	0.0951961	0.0749428	0.985	0.968	1	HSP90AA1	1.02138
HTATSF1	0.0953037	-0.0900908	0.323	0.406	1	HTATSF1	1.02089
TAF1B	0.0953154	0.0993182	0.195	0.123	1	TAF1B	1.02084
OXNAD1	0.095337	-0.18978	0.301	0.369	1	OXNAD1	1.02074
SACS	0.0953468	-0.142591	0.188	0.267	1	SACS	1.02069
DHX36	0.0953497	-0.160854	0.436	0.508	1	DHX36	1.02068
TNK2	0.0955645	0.116685	0.12	0.07	1	TNK2	1.0197
SELPLG	0.0957551	0.178109	0.579	0.54	1	SELPLG	1.01884
MGME1	0.0960209	0.106732	0.218	0.144	1	MGME1	1.01763
OSTM1	0.0961619	-0.128199	0.158	0.23	1	OSTM1	1.017
RAB18	0.0965331	0.126185	0.368	0.289	1	RAB18	1.01532
WDR60	0.0966114	0.0649376	0.135	0.075	1	WDR60	1.01497
HK1	0.0966306	0.166518	0.316	0.257	1	HK1	1.01489
RAB2A	0.0967448	0.170048	0.474	0.406	1	RAB2A	1.01437
SNW1	0.0970033	-0.0829585	0.391	0.497	1	SNW1	1.01321
ASAP1	0.0972675	-0.0673815	0.053	0.107	1	ASAP1	1.01203
RPL34	0.097655	-0.0681522	1	1	1	RPL34	1.01031
TFAM	0.0977198	-0.149566	0.256	0.326	1	TFAM	1.01002
PHLDA3	0.0977818	-0.0799805	0.053	0.107	1	PHLDA3	1.00974
CNP	0.0982644	0.0719387	0.195	0.123	1	CNP	1.0076
C19orf48	0.098306	0.111002	0.128	0.075	1	C19orf48	1.00742
ZBTB7B	0.0983746	0.121961	0.248	0.171	1	ZBTB7B	1.00712
SPCS1	0.0985472	0.097657	0.797	0.733	1	SPCS1	1.00636
44085	0.0986543	0.117678	0.226	0.155	1	44085	1.00588
MUM1	0.0987523	0.172154	0.195	0.134	1	MUM1	1.00545
TENT4A	0.098793	0.114966	0.128	0.075	1	TENT4A	1.00527
MAD2L2	0.0988259	0.0750116	0.158	0.096	1	MAD2L2	1.00513
NOP58	0.0990013	0.176028	0.444	0.374	1	NOP58	1.00436
GFOD2	0.0990233	-0.0989001	0.075	0.134	1	GFOD2	1.00426
PGP	0.099268	0.113965	0.444	0.348	1	PGP	1.00319
HSP90AB1	0.0993457	-0.0966068	0.774	0.872	1	HSP90AB1	1.00285
CYHR1	0.099476	0.0925542	0.233	0.16	1	CYHR1	1.00228
AGMAT	0.0995508	0.0320297	0.105	0.053	1	AGMAT	1.00196
MRPL57	0.0995557	0.15919	0.609	0.578	1	MRPL57	1.00193
TOP1	0.0996852	0.142042	0.662	0.599	1	TOP1	1.00137
SPTLC1	0.099769	-0.0982781	0.143	0.214	1	SPTLC1	1.001
H2AFZ	0.100354	0.098288	0.872	0.856	1	H2AFZ	0.998467
LCMT1	0.100412	-0.123638	0.18	0.251	1	LCMT1	0.998216
UBAP1	0.10042	-0.0790268	0.075	0.134	1	UBAP1	0.998178
EMC10	0.100461	-0.148917	0.256	0.342	1	EMC10	0.998002
CORO1B	0.100985	-0.134229	0.82	0.872	1	CORO1B	0.995742
MANF	0.101016	-0.151151	0.286	0.374	1	MANF	0.995609
SLC35F6	0.101257	0.0947012	0.128	0.075	1	SLC35F6	0.994574
RASA2	0.101452	-0.0888903	0.218	0.316	1	RASA2	0.993738
NQO2	0.10149	0.077958	0.195	0.123	1	NQO2	0.993578
MAGOHB	0.101687	-0.0854991	0.105	0.171	1	MAGOHB	0.992733
EMC9	0.101817	0.0957469	0.15	0.091	1	EMC9	0.99218
TIMM17B	0.101899	0.0981027	0.211	0.144	1	TIMM17B	0.99183
SKAP2	0.1021	-0.175319	0.256	0.326	1	SKAP2	0.990976
DGAT1	0.102914	-0.0840764	0.135	0.214	1	DGAT1	0.987527
MRPL47	0.103092	0.127039	0.436	0.358	1	MRPL47	0.986776
MAT2A	0.10311	-0.10704	0.18	0.257	1	MAT2A	0.986698
BCL2L12	0.10314	-0.0993344	0.06	0.112	1	BCL2L12	0.986573
SPTSSA	0.103258	-0.0904218	0.09	0.15	1	SPTSSA	0.986078
NCOA1	0.1033	0.119128	0.248	0.182	1	NCOA1	0.985898
TENT5C	0.103314	0.0571352	0.158	0.096	1	TENT5C	0.985842
RNF114	0.103356	-0.11051	0.226	0.305	1	RNF114	0.985663
CLTC	0.103527	0.119716	0.414	0.326	1	CLTC	0.984948
FAM50A	0.103589	0.149176	0.534	0.444	1	FAM50A	0.984687
HNRNPH1	0.10426	-0.141526	0.549	0.604	1	HNRNPH1	0.981884
CAPN15	0.10446	-0.0649638	0.083	0.144	1	CAPN15	0.981051
SLC16A1-AS1	0.104568	-0.13101	0.203	0.278	1	SLC16A1-AS1	0.980601
ZNF580	0.104727	0.0965335	0.233	0.16	1	ZNF580	0.979942
RPL11	0.104803	-0.0512771	1	1	1	RPL11	0.979626
NIN	0.104833	0.0698158	0.353	0.267	1	NIN	0.979502
USP3	0.104923	0.062924	0.391	0.305	1	USP3	0.97913
HAGH	0.105499	0.13048	0.481	0.39	1	HAGH	0.97675
DNAJA1	0.105564	0.136604	0.662	0.642	1	DNAJA1	0.976483
ZNF800	0.105649	0.0905944	0.346	0.262	1	ZNF800	0.976134
PRPF8	0.105843	-0.105581	0.278	0.364	1	PRPF8	0.975336
COPS7A	0.106301	0.0771	0.12	0.07	1	COPS7A	0.973464
PMCH	0.106337	-0.0494639	0.083	0.144	1	PMCH	0.973315
RPS28	0.106653	-0.0578471	1	1	1	RPS28	0.972026
FLNB	0.10667	0.0852865	0.226	0.155	1	FLNB	0.97196
TSG101	0.107045	0.110301	0.391	0.316	1	TSG101	0.970435
POLE4	0.107053	-0.152682	0.226	0.305	1	POLE4	0.970403
CDK9	0.10728	-0.0474964	0.15	0.23	1	CDK9	0.969483
PPP6C	0.107342	-0.0987099	0.173	0.251	1	PPP6C	0.969232
POU2F1	0.107371	0.0963714	0.12	0.07	1	POU2F1	0.969113
PRPF40A	0.107503	-0.122525	0.474	0.556	1	PRPF40A	0.968581
MFN1	0.107722	-0.0833902	0.068	0.123	1	MFN1	0.967697
GALNT10	0.107969	-0.102715	0.12	0.182	1	GALNT10	0.9667
MYDGF	0.108136	0.0894111	0.421	0.321	1	MYDGF	0.966029
VPS35	0.108325	0.126396	0.489	0.401	1	VPS35	0.965271
BPNT1	0.10845	-0.0857022	0.06	0.112	1	BPNT1	0.964771
WDR44	0.108471	0.100684	0.135	0.08	1	WDR44	0.964686
TPI1	0.108662	0.119938	0.797	0.727	1	TPI1	0.963922
ZMYM4	0.108937	-0.104045	0.083	0.139	1	ZMYM4	0.962824
ZNF639	0.108962	0.129158	0.15	0.096	1	ZNF639	0.962724
MRPS23	0.109112	0.144137	0.316	0.241	1	MRPS23	0.962127
NUMB	0.109384	-0.067715	0.105	0.176	1	NUMB	0.961046
UBXN1	0.109414	-0.0873578	0.774	0.818	1	UBXN1	0.960927
RNF220	0.109473	0.0840762	0.128	0.075	1	RNF220	0.960693
ARMC10	0.109537	0.0984168	0.211	0.144	1	ARMC10	0.96044
RPS8	0.109613	-0.0780702	1	1	1	RPS8	0.960137
KDM5B	0.109671	-0.0969007	0.226	0.31	1	KDM5B	0.959908
PSMA3	0.109897	0.0997825	0.669	0.567	1	PSMA3	0.959012
LIMS2	0.109972	0.0910098	0.158	0.102	1	LIMS2	0.958718
AKIRIN2	0.109996	0.182128	0.233	0.16	1	AKIRIN2	0.958622
LIAS	0.110004	0.0959403	0.128	0.075	1	LIAS	0.958593
RBX1	0.110088	0.0982449	0.774	0.77	1	RBX1	0.95826
TRAPPC6B	0.110195	-0.0993361	0.15	0.219	1	TRAPPC6B	0.957836
C6orf106	0.110395	-0.125061	0.128	0.193	1	C6orf106	0.95705
LETM1	0.110447	0.0967158	0.158	0.102	1	LETM1	0.956845
JOSD1	0.110761	0.116482	0.271	0.198	1	JOSD1	0.955614
PTP4A2	0.111086	0.140219	0.774	0.781	1	PTP4A2	0.954342
GNPAT	0.111186	0.101057	0.241	0.166	1	GNPAT	0.953948
PET100	0.111311	0.126621	0.451	0.39	1	PET100	0.953461
POP4	0.111328	0.0860178	0.308	0.241	1	POP4	0.953396
MAD1L1	0.111391	-0.11314	0.474	0.545	1	MAD1L1	0.95315
RWDD4	0.111416	-0.0808924	0.135	0.209	1	RWDD4	0.953054
STYX	0.11168	-0.0848406	0.143	0.214	1	STYX	0.952024
LINC00476	0.111876	-0.117578	0.068	0.118	1	LINC00476	0.951263
SLC30A7	0.111894	-0.0767758	0.113	0.182	1	SLC30A7	0.951193
GTF2I	0.111899	0.117496	0.459	0.369	1	GTF2I	0.951174
RABGGTA	0.11193	0.0815205	0.113	0.064	1	RABGGTA	0.951053
PRELID1	0.111952	0.120436	0.857	0.834	1	PRELID1	0.950969
P2RX5	0.112173	0.101133	0.18	0.118	1	P2RX5	0.950111
ABCE1	0.112516	0.1435	0.361	0.283	1	ABCE1	0.948786
POLR1C	0.112692	-0.0824405	0.053	0.102	1	POLR1C	0.948106
COX4I1	0.112774	0.0826745	0.985	0.968	1	COX4I1	0.947792
MRPS18C	0.112835	0.125416	0.444	0.38	1	MRPS18C	0.947557
FNBP4	0.112865	0.0997674	0.481	0.39	1	FNBP4	0.947439
BAD	0.11294	0.0967665	0.211	0.139	1	BAD	0.947153
MTF1	0.11328	-0.0677255	0.053	0.102	1	MTF1	0.945846
DOCK2	0.113444	-0.0669627	0.323	0.428	1	DOCK2	0.945218
MR1	0.113617	-0.116969	0.158	0.23	1	MR1	0.944558
SAE1	0.11362	-0.123755	0.105	0.166	1	SAE1	0.944546
NTPCR	0.113662	0.0974866	0.113	0.064	1	NTPCR	0.944387
NFKBIB	0.113726	-0.090148	0.12	0.187	1	NFKBIB	0.944139
TMEM87B	0.113774	-0.11656	0.068	0.118	1	TMEM87B	0.943957
CD7	0.113777	0.10341	0.835	0.77	1	CD7	0.943944
GRK2	0.113845	0.127551	0.496	0.412	1	GRK2	0.943687
DHRS4-AS1	0.113974	-0.0897036	0.06	0.112	1	DHRS4-AS1	0.943193
ZNF675	0.114001	0.0973028	0.18	0.118	1	ZNF675	0.943092
CD48	0.114058	-0.0677268	0.812	0.888	1	CD48	0.942874
CCDC71L	0.114219	0.0347531	0.248	0.166	1	CCDC71L	0.942263
UBE4B	0.114231	0.0690498	0.143	0.086	1	UBE4B	0.942217
MALT1	0.114375	-0.161768	0.248	0.31	1	MALT1	0.94167
ANKFY1	0.114482	-0.0923679	0.135	0.203	1	ANKFY1	0.941264
PPIF	0.11455	0.161345	0.165	0.112	1	PPIF	0.941004
PIGH	0.114743	0.0626155	0.135	0.08	1	PIGH	0.940274
UQCRQ	0.114825	0.106877	0.549	0.46	1	UQCRQ	0.939964
RSBN1L	0.115285	-0.133257	0.496	0.561	1	RSBN1L	0.938226
RPL21	0.115586	-0.0660498	1	1	1	RPL21	0.937096
COPB1	0.115588	0.109743	0.436	0.364	1	COPB1	0.937086
SHLD1	0.115674	0.0743954	0.12	0.07	1	SHLD1	0.936764
PIGK	0.11582	0.107396	0.218	0.15	1	PIGK	0.936216
GIPC1	0.115933	0.130548	0.338	0.262	1	GIPC1	0.935791
ANAPC5	0.116125	-0.0914571	0.406	0.497	1	ANAPC5	0.935074
STUB1	0.116284	0.128119	0.594	0.513	1	STUB1	0.93448
LSM12	0.116301	0.0835876	0.368	0.267	1	LSM12	0.934415
HIST1H2AC	0.116359	0.0745455	0.105	0.059	1	HIST1H2AC	0.934199
CCDC93	0.116382	0.102693	0.15	0.096	1	CCDC93	0.934113
ZFAS1	0.116385	-0.133498	0.654	0.711	1	ZFAS1	0.934105
TBCC	0.116542	0.131171	0.406	0.342	1	TBCC	0.933519
CIC	0.116594	0.0986335	0.113	0.064	1	CIC	0.933323
NDUFB2	0.116627	0.111765	0.744	0.706	1	NDUFB2	0.9332
STMN3	0.116639	0.0809869	0.188	0.123	1	STMN3	0.933158
RNFT1	0.116712	-0.0411942	0.098	0.166	1	RNFT1	0.932884
YARS2	0.116833	0.0659928	0.211	0.139	1	YARS2	0.932433
DYRK4	0.116896	0.0789513	0.135	0.08	1	DYRK4	0.932201
ARIH2	0.116918	0.132756	0.263	0.193	1	ARIH2	0.932118
FAF2	0.117181	-0.106573	0.188	0.262	1	FAF2	0.931143
SPG21	0.117445	-0.126698	0.15	0.214	1	SPG21	0.930165
NRBP1	0.117532	0.12417	0.338	0.262	1	NRBP1	0.929846
SERF2	0.117585	0.0638364	0.992	0.995	1	SERF2	0.92965
GARS	0.117936	0.0797485	0.226	0.155	1	GARS	0.928353
KPNA1	0.117995	-0.0806405	0.083	0.139	1	KPNA1	0.928137
TMEM179B	0.118021	0.111073	0.444	0.358	1	TMEM179B	0.92804
PRF1	0.118646	0.145156	0.293	0.23	1	PRF1	0.925745
VTA1	0.118781	0.104739	0.158	0.102	1	VTA1	0.925251
AC114760.2	0.118803	-0.0926502	0.105	0.166	1	AC114760.2	0.925173
PNPLA6	0.118839	0.0849707	0.165	0.107	1	PNPLA6	0.925042
GUCD1	0.119904	0.0817429	0.128	0.075	1	GUCD1	0.921167
STAM2	0.119904	0.0734385	0.128	0.075	1	STAM2	0.921167
RBMXL1	0.119978	0.103266	0.15	0.096	1	RBMXL1	0.920898
MAP3K5	0.120512	0.105792	0.263	0.187	1	MAP3K5	0.918969
DCTN6	0.120519	-0.0867257	0.15	0.219	1	DCTN6	0.918944
TMEM245	0.120713	0.104413	0.211	0.144	1	TMEM245	0.918245
ELF2	0.120959	0.167411	0.301	0.241	1	ELF2	0.917361
SEC11C	0.121703	0.114494	0.669	0.578	1	SEC11C	0.914699
CEP350	0.121705	-0.122504	0.323	0.412	1	CEP350	0.914691
ZUP1	0.122084	-0.104498	0.098	0.155	1	ZUP1	0.913342
BLVRA	0.122174	0.0923267	0.188	0.128	1	BLVRA	0.913022
C11orf49	0.122295	-0.108061	0.113	0.171	1	C11orf49	0.912592
UBE2K	0.122468	0.0648639	0.444	0.337	1	UBE2K	0.911977
PSME1	0.122574	0.1334	0.887	0.856	1	PSME1	0.9116
JPT1	0.122589	0.111351	0.789	0.722	1	JPT1	0.91155
SYT11	0.122599	0.0903275	0.15	0.096	1	SYT11	0.911512
KDM4B	0.122673	0.0695078	0.12	0.07	1	KDM4B	0.91125
NFE2L2	0.12282	0.0830872	0.496	0.428	1	NFE2L2	0.910732
C1D	0.122944	-0.131214	0.323	0.39	1	C1D	0.910292
MAP2K4	0.123201	-0.0776366	0.075	0.128	1	MAP2K4	0.909386
IFI27L2	0.123417	0.118069	0.556	0.492	1	IFI27L2	0.908625
FUNDC2	0.123465	0.0888085	0.316	0.241	1	FUNDC2	0.908457
PTPN7	0.123606	-0.0873085	0.579	0.695	1	PTPN7	0.90796
DYNC1H1	0.123641	0.140214	0.586	0.519	1	DYNC1H1	0.907836
TEN1	0.123686	0.0563181	0.195	0.128	1	TEN1	0.907679
TXNDC9	0.123877	-0.101604	0.293	0.374	1	TXNDC9	0.907008
MYL6	0.123894	0.0787879	1	1	1	MYL6	0.906951
KANSL1-AS1	0.123896	0.0537403	0.105	0.059	1	KANSL1-AS1	0.906943
MFSD8	0.123909	0.0953572	0.158	0.102	1	MFSD8	0.906895
LINC01184	0.123937	0.0698498	0.128	0.075	1	LINC01184	0.906798
DUSP2	0.124195	-0.118531	0.271	0.364	1	DUSP2	0.905897
ZNF43	0.124497	0.0752274	0.113	0.064	1	ZNF43	0.90484
DPP7	0.124603	-0.0779033	0.632	0.69	1	DPP7	0.904471
ZNF280D	0.124664	-0.0992034	0.113	0.176	1	ZNF280D	0.904259
ZNF791	0.124945	-0.128844	0.301	0.374	1	ZNF791	0.903281
PITPNA	0.125579	0.0767266	0.226	0.155	1	PITPNA	0.901084
P4HB	0.125849	0.0989183	0.489	0.406	1	P4HB	0.900151
NUP214	0.125986	-0.0793236	0.083	0.139	1	NUP214	0.899679
PRKCB	0.126117	-0.130671	0.429	0.492	1	PRKCB	0.899225
VAPA	0.126257	0.0828681	0.669	0.604	1	VAPA	0.898745
ARSA	0.126379	0.0836317	0.113	0.064	1	ARSA	0.898325
PRPF39	0.126918	-0.101687	0.083	0.134	1	PRPF39	0.896478
KIAA0232	0.127091	0.0843256	0.211	0.144	1	KIAA0232	0.895885
COPS2	0.127366	-0.106575	0.233	0.316	1	COPS2	0.894947
CEP63	0.127439	0.0247055	0.165	0.102	1	CEP63	0.894696
MRPL24	0.127724	-0.0818379	0.075	0.128	1	MRPL24	0.893728
CARS2	0.127915	-0.0951952	0.15	0.214	1	CARS2	0.893077
CCDC59	0.128002	-0.0983218	0.286	0.374	1	CCDC59	0.892783
PSMC6	0.128187	-0.0958356	0.391	0.487	1	PSMC6	0.892156
HDHD5	0.128298	-0.0729659	0.075	0.128	1	HDHD5	0.89178
LSM2	0.128369	-0.117684	0.323	0.401	1	LSM2	0.891541
RPS4X	0.12845	-0.0683333	1	1	1	RPS4X	0.891267
TMEM41B	0.12849	-0.0987814	0.12	0.182	1	TMEM41B	0.89113
MECP2	0.128554	-0.120307	0.293	0.374	1	MECP2	0.890915
KIF2A	0.12867	0.0727907	0.684	0.588	1	KIF2A	0.890522
PPHLN1	0.128693	-0.0886672	0.489	0.567	1	PPHLN1	0.890445
FNTA	0.128714	0.0889042	0.421	0.358	1	FNTA	0.890373
METTL9	0.128784	0.117519	0.609	0.556	1	METTL9	0.89014
LMOD3	0.128875	-0.0815607	0.075	0.128	1	LMOD3	0.889833
LPCAT4	0.129297	0.0899768	0.203	0.139	1	LPCAT4	0.888413
MAP3K3	0.129308	-0.0888518	0.098	0.155	1	MAP3K3	0.888374
COX7B	0.129345	0.127509	0.722	0.658	1	COX7B	0.888252
VPS26C	0.129386	-0.0867741	0.128	0.198	1	VPS26C	0.888111
ACSS1	0.129685	-0.106877	0.113	0.171	1	ACSS1	0.88711
TNRC18	0.129795	0.0659448	0.105	0.059	1	TNRC18	0.886744
ADAM12	0.129946	-0.0562884	0.068	0.123	1	ADAM12	0.886238
TMEM33	0.130269	-0.0990061	0.188	0.257	1	TMEM33	0.885159
RELA	0.130277	-0.0770292	0.218	0.31	1	RELA	0.885133
AAMP	0.130368	0.112197	0.195	0.139	1	AAMP	0.88483
CSTF3	0.130564	-0.0676056	0.098	0.16	1	CSTF3	0.884178
APOBEC3C	0.130637	0.123282	0.511	0.417	1	APOBEC3C	0.883934
PDK2	0.130856	0.0746678	0.113	0.064	1	PDK2	0.883206
HADHA	0.130895	0.133793	0.549	0.492	1	HADHA	0.883077
TNIP2	0.131001	0.158058	0.444	0.374	1	TNIP2	0.882725
UTP11	0.131039	-0.0732493	0.143	0.214	1	UTP11	0.8826
WIPF2	0.131097	-0.119911	0.128	0.187	1	WIPF2	0.882408
BFAR	0.131739	-0.137298	0.211	0.273	1	BFAR	0.880286
SF3A1	0.131754	-0.130446	0.233	0.31	1	SF3A1	0.880236
FBXO34	0.13179	-0.0822497	0.105	0.166	1	FBXO34	0.880118
HDAC8	0.132069	-0.0420744	0.053	0.102	1	HDAC8	0.879198
SEC23A	0.132118	-0.0738894	0.158	0.23	1	SEC23A	0.879037
TMEM248	0.132136	0.13188	0.474	0.406	1	TMEM248	0.878979
SMC1A	0.132189	0.104855	0.391	0.316	1	SMC1A	0.878805
SLC39A10	0.132285	-0.138468	0.218	0.289	1	SLC39A10	0.878489
UXT	0.132286	0.121368	0.714	0.69	1	UXT	0.878485
ARL3	0.132375	0.103781	0.135	0.086	1	ARL3	0.878194
SMURF2	0.132412	-0.0921726	0.06	0.107	1	SMURF2	0.878074
PFKFB3	0.132412	-0.100679	0.06	0.107	1	PFKFB3	0.878074
ETS1	0.132473	0.134565	0.902	0.834	1	ETS1	0.877874
PLEKHO2	0.132576	-0.0931663	0.083	0.134	1	PLEKHO2	0.877537
S100A6	0.132977	0.0992722	0.992	0.995	1	S100A6	0.876225
AC008105.3	0.133142	-0.0650817	0.323	0.412	1	AC008105.3	0.875684
NCAPD3	0.133164	0.0647913	0.105	0.059	1	NCAPD3	0.875612
VCP	0.133203	0.0854508	0.669	0.578	1	VCP	0.875485
GSTO1	0.133293	0.158485	0.677	0.62	1	GSTO1	0.875192
HACD1	0.133369	0.0843644	0.188	0.123	1	HACD1	0.874947
DIDO1	0.13369	-0.0541828	0.195	0.278	1	DIDO1	0.8739
REEP5	0.13373	0.106255	0.805	0.781	1	REEP5	0.873772
BCAP29	0.133892	-0.0656914	0.226	0.305	1	BCAP29	0.873246
ACTN1	0.133941	-0.0844147	0.12	0.182	1	ACTN1	0.873088
VAMP2	0.134376	-0.0825856	0.654	0.733	1	VAMP2	0.87168
NLRP1	0.134678	-0.0667521	0.248	0.326	1	NLRP1	0.870704
ARID5B	0.134946	0.174507	0.737	0.722	1	ARID5B	0.869841
C19orf24	0.134998	-0.0934973	0.421	0.492	1	C19orf24	0.869672
KDM3A	0.135062	-0.124476	0.113	0.171	1	KDM3A	0.869468
ETFB	0.135065	0.0900357	0.511	0.422	1	ETFB	0.869457
PPP2CB	0.135314	-0.0505286	0.075	0.134	1	PPP2CB	0.868658
TMEM80	0.13542	-0.0715289	0.068	0.118	1	TMEM80	0.868317
PPP2R1B	0.135455	0.0677128	0.113	0.064	1	PPP2R1B	0.868204
SCOC	0.135468	0.0879791	0.173	0.118	1	SCOC	0.868163
LGALS3	0.135711	0.165335	0.88	0.797	1	LGALS3	0.867385
ARL6IP1	0.135798	-0.121816	0.383	0.46	1	ARL6IP1	0.867106
ANAPC10	0.135907	0.0544473	0.143	0.086	1	ANAPC10	0.866759
PQLC3	0.135908	0.114161	0.271	0.203	1	PQLC3	0.866754
KLF10	0.135949	-0.0928825	0.075	0.128	1	KLF10	0.866625
DUSP28	0.136124	-0.0731874	0.083	0.139	1	DUSP28	0.866066
PEF1	0.136227	0.0673676	0.308	0.23	1	PEF1	0.865737
CGRRF1	0.136256	-0.103107	0.105	0.16	1	CGRRF1	0.865644
CTNNA1	0.136408	-0.0471438	0.12	0.187	1	CTNNA1	0.865162
ZNF581	0.136495	0.0971784	0.188	0.128	1	ZNF581	0.864884
SSRP1	0.13665	-0.0542298	0.15	0.225	1	SSRP1	0.86439
APPBP2	0.136685	-0.0781067	0.158	0.23	1	APPBP2	0.86428
ZBTB14	0.136705	-0.0603741	0.083	0.139	1	ZBTB14	0.864216
ELOB	0.136986	0.0666518	0.917	0.829	1	ELOB	0.863322
PEX16	0.137004	-0.118713	0.241	0.305	1	PEX16	0.863268
PCMTD1	0.137015	-0.116508	0.353	0.444	1	PCMTD1	0.863231
R3HCC1L	0.137066	0.0656898	0.173	0.112	1	R3HCC1L	0.86307
WDR3	0.137306	-0.0797328	0.068	0.118	1	WDR3	0.862311
STAM	0.137725	0.118264	0.459	0.38	1	STAM	0.860988
EPC1	0.137938	0.129891	0.571	0.487	1	EPC1	0.860316
MAIP1	0.137939	-0.0686904	0.068	0.118	1	MAIP1	0.860313
RFX5	0.138094	0.0966371	0.165	0.112	1	RFX5	0.859826
PABPN1	0.138259	0.0848549	0.414	0.337	1	PABPN1	0.859305
PSMG4	0.138404	-0.126821	0.135	0.193	1	PSMG4	0.858851
TFIP11	0.13855	-0.0679317	0.113	0.176	1	TFIP11	0.858394
PSMA5	0.138748	0.127712	0.774	0.684	1	PSMA5	0.857774
RPS16	0.13893	-0.0537916	1	1	1	RPS16	0.857203
EYA3	0.138983	0.0931121	0.135	0.086	1	EYA3	0.857038
FAM219B	0.139128	-0.107804	0.135	0.198	1	FAM219B	0.856585
PKD2	0.139278	0.0707135	0.15	0.096	1	PKD2	0.856118
GEMIN6	0.139621	-0.0929754	0.083	0.134	1	GEMIN6	0.85505
POLR2F	0.139696	0.118983	0.361	0.283	1	POLR2F	0.854815
PFDN1	0.139916	0.107178	0.338	0.262	1	PFDN1	0.854133
TGIF1	0.140222	-0.159256	0.113	0.166	1	TGIF1	0.853184
ZNF669	0.140232	-0.0555958	0.083	0.139	1	ZNF669	0.853152
PDCD6IP	0.14048	-0.111922	0.316	0.385	1	PDCD6IP	0.852386
CAPN1	0.140932	0.122378	0.316	0.241	1	CAPN1	0.850992
VPS13A	0.1412	0.14413	0.271	0.198	1	VPS13A	0.850165
PABPC1	0.141216	-0.0842445	0.955	0.952	1	PABPC1	0.850117
S100A11	0.141233	0.0968379	0.977	0.973	1	S100A11	0.850064
TRAF1	0.141462	-0.124574	0.376	0.444	1	TRAF1	0.84936
SMAD7	0.14166	-0.0894836	0.06	0.107	1	SMAD7	0.848754
SRGN	0.141704	0.0821018	0.962	0.936	1	SRGN	0.848618
AC100810.1	0.141947	0.0356165	0.143	0.086	1	AC100810.1	0.847875
C5orf24	0.142144	0.113376	0.211	0.144	1	C5orf24	0.847273
CRADD	0.142693	0.089856	0.135	0.086	1	CRADD	0.845597
KLHDC3	0.14316	-0.0958127	0.135	0.198	1	KLHDC3	0.844179
TANK	0.143275	-0.0762003	0.474	0.545	1	TANK	0.843829
C1orf52	0.143321	0.0920421	0.188	0.128	1	C1orf52	0.843691
MT2A	0.143461	0.120068	0.519	0.417	1	MT2A	0.843267
CYB5R3	0.143674	-0.0404159	0.098	0.16	1	CYB5R3	0.842622
TPST2	0.143688	0.096718	0.308	0.225	1	TPST2	0.842578
MICU1	0.143856	-0.0970191	0.113	0.171	1	MICU1	0.842071
GTF2A1	0.143947	-0.0608793	0.075	0.128	1	GTF2A1	0.841799
ENY2	0.14403	0.120697	0.474	0.433	1	ENY2	0.841546
ARPC2	0.144075	0.058505	1	0.989	1	ARPC2	0.841411
XAF1	0.144228	0.125244	0.421	0.342	1	XAF1	0.84095
ARF6	0.144355	0.116446	0.624	0.535	1	ARF6	0.840568
NME7	0.144394	-0.0661307	0.068	0.118	1	NME7	0.84045
RAB3IP	0.144396	0.0700345	0.158	0.102	1	RAB3IP	0.840444
GOLGA5	0.144404	0.056932	0.105	0.059	1	GOLGA5	0.840421
TTC14	0.144497	-0.124544	0.383	0.444	1	TTC14	0.84014
SNRPC	0.144715	0.0826539	0.511	0.444	1	SNRPC	0.839486
TUBGCP2	0.144817	0.0949073	0.323	0.251	1	TUBGCP2	0.83918
GPS1	0.145209	0.0810515	0.211	0.144	1	GPS1	0.838006
LRPPRC	0.145381	0.117471	0.165	0.112	1	LRPPRC	0.837491
C12orf10	0.145413	0.0910425	0.301	0.235	1	C12orf10	0.837398
CUL2	0.1457	0.127403	0.256	0.198	1	CUL2	0.83654
MYD88	0.14577	0.103626	0.286	0.219	1	MYD88	0.836331
PPP1R3E	0.145772	-0.0778385	0.06	0.107	1	PPP1R3E	0.836326
SLC25A3	0.145818	0.0909892	0.887	0.888	1	SLC25A3	0.836188
ZNHIT3	0.145875	0.0897331	0.398	0.321	1	ZNHIT3	0.83602
HDAC1	0.145972	-0.106188	0.353	0.444	1	HDAC1	0.83573
PHF21A	0.146375	-0.0661222	0.068	0.118	1	PHF21A	0.834532
ARL8A	0.146426	0.0767858	0.241	0.171	1	ARL8A	0.834383
HIST1H4C	0.146469	-0.111316	0.301	0.38	1	HIST1H4C	0.834255
IQCB1	0.146559	-0.0910794	0.075	0.123	1	IQCB1	0.833988
DCAF11	0.146683	-0.0811802	0.165	0.235	1	DCAF11	0.83362
RNASET2	0.146684	-0.0988373	0.692	0.743	1	RNASET2	0.833617
AP1G1	0.146891	0.07884	0.203	0.139	1	AP1G1	0.833005
ZFP36L1	0.147006	-0.116085	0.526	0.578	1	ZFP36L1	0.832665
CD99	0.147568	0.11268	0.714	0.663	1	CD99	0.831008
SS18	0.147574	0.0851553	0.286	0.219	1	SS18	0.830991
CNPY3	0.147985	-0.0909901	0.233	0.31	1	CNPY3	0.829781
CRLF3	0.14844	-0.106154	0.218	0.299	1	CRLF3	0.828448
CD37	0.14845	-0.0912436	0.865	0.882	1	CD37	0.828421
ZFAND2B	0.148472	0.079954	0.226	0.16	1	ZFAND2B	0.828355
FADD	0.148488	-0.0745273	0.128	0.187	1	FADD	0.82831
GATC	0.148507	-0.0943121	0.075	0.123	1	GATC	0.828253
ANKRD36C	0.148525	-0.100097	0.15	0.209	1	ANKRD36C	0.828199
DDX52	0.148645	0.106201	0.241	0.176	1	DDX52	0.827849
FBRS	0.14888	0.0742919	0.241	0.171	1	FBRS	0.827163
ATP5MC1	0.149067	0.119396	0.451	0.396	1	ATP5MC1	0.826618
TCF25	0.149071	-0.0897704	0.526	0.588	1	TCF25	0.826607
EIF3F	0.149107	-0.121239	0.82	0.861	1	EIF3F	0.826503
TSSC4	0.149172	-0.0664288	0.346	0.444	1	TSSC4	0.826314
VBP1	0.149177	0.146061	0.436	0.369	1	VBP1	0.826297
RNF103	0.149268	-0.0530542	0.06	0.107	1	RNF103	0.826033
CFAP36	0.149547	-0.0839199	0.143	0.203	1	CFAP36	0.825221
PBDC1	0.149808	0.147539	0.391	0.321	1	PBDC1	0.824466
SIAH2	0.150067	0.0651603	0.218	0.15	1	SIAH2	0.823714
MIDN	0.150624	-0.113877	0.301	0.385	1	MIDN	0.822107
UBE2R2	0.150828	-0.0740785	0.278	0.348	1	UBE2R2	0.821518
VPS11	0.150832	0.0853035	0.128	0.08	1	VPS11	0.821506
USP47	0.151085	0.119817	0.338	0.278	1	USP47	0.820778
CNOT11	0.151111	-0.0785965	0.143	0.203	1	CNOT11	0.820703
CTLA4	0.151526	0.124477	0.406	0.316	1	CTLA4	0.819512
STK39	0.151865	-0.0587578	0.083	0.139	1	STK39	0.818543
USP1	0.151945	-0.117921	0.263	0.332	1	USP1	0.818313
IARS	0.152124	-0.0965418	0.15	0.209	1	IARS	0.817803
LINC01678	0.152176	0.0879977	0.128	0.08	1	LINC01678	0.817654
KMT2E	0.152345	0.0696388	0.729	0.658	1	KMT2E	0.817172
MSRB1	0.152797	0.0889751	0.18	0.123	1	MSRB1	0.815885
HEATR1	0.152828	-0.0466647	0.06	0.107	1	HEATR1	0.815798
SKA2	0.152866	-0.0900199	0.241	0.31	1	SKA2	0.815688
CAPZA1	0.15287	-0.086275	0.579	0.695	1	CAPZA1	0.815678
BBX	0.152944	0.158108	0.398	0.342	1	BBX	0.815467
LYRM2	0.152947	0.100474	0.278	0.214	1	LYRM2	0.815458
ENTR1	0.153281	-0.0735091	0.083	0.134	1	ENTR1	0.814513
ZCCHC2	0.153313	0.127702	0.18	0.128	1	ZCCHC2	0.81442
ISG20	0.153376	0.118907	0.94	0.984	1	ISG20	0.814244
NFIC	0.153591	-0.0657342	0.105	0.166	1	NFIC	0.813633
CKS2	0.153612	-0.0763865	0.165	0.23	1	CKS2	0.813576
CMTR1	0.153635	0.0804936	0.12	0.075	1	CMTR1	0.813509
MIEF1	0.153836	0.0760143	0.15	0.096	1	MIEF1	0.812942
AC127521.1	0.153908	0.0705715	0.113	0.07	1	AC127521.1	0.812738
TMED7	0.154329	0.0937025	0.188	0.128	1	TMED7	0.811551
MAPK1	0.154634	-0.104882	0.158	0.225	1	MAPK1	0.810695
FAM215B	0.154637	-0.0786774	0.15	0.214	1	FAM215B	0.810687
B3GALT4	0.154637	-0.0971872	0.15	0.214	1	B3GALT4	0.810687
TBCD	0.154639	0.0622302	0.158	0.102	1	TBCD	0.810682
DDX19A	0.1551	0.0701743	0.15	0.096	1	DDX19A	0.809389
NPC2	0.155302	0.079508	0.346	0.278	1	NPC2	0.808824
CES4A	0.15539	-0.0840967	0.068	0.112	1	CES4A	0.808576
MRPL58	0.155474	0.0763964	0.316	0.246	1	MRPL58	0.808343
DCTD	0.155599	0.106492	0.18	0.128	1	DCTD	0.807994
AAED1	0.15587	0.068401	0.143	0.091	1	AAED1	0.807238
LZIC	0.156061	0.0937355	0.226	0.166	1	LZIC	0.806706
BCL11B	0.156113	-0.111895	0.526	0.572	1	BCL11B	0.806561
TXLNA	0.156424	0.0775823	0.256	0.187	1	TXLNA	0.805697
TOX	0.156432	0.0998988	0.241	0.171	1	TOX	0.805673
CEBPZ	0.156451	-0.119177	0.241	0.31	1	CEBPZ	0.805622
SH3BP1	0.156846	-0.118103	0.203	0.278	1	SH3BP1	0.804525
STIP1	0.156905	-0.0547386	0.233	0.321	1	STIP1	0.804363
FAM126A	0.15713	0.0937353	0.376	0.305	1	FAM126A	0.80374
IRF2BPL	0.157177	-0.0826643	0.083	0.134	1	IRF2BPL	0.803611
GRHPR	0.157188	0.0781112	0.218	0.155	1	GRHPR	0.803581
TMEM116	0.157216	-0.0559322	0.098	0.15	1	TMEM116	0.803502
NPC1	0.157296	-0.120891	0.075	0.118	1	NPC1	0.803283
ZMIZ2	0.157873	0.112273	0.12	0.075	1	ZMIZ2	0.801692
MLLT10	0.157979	0.0663018	0.211	0.144	1	MLLT10	0.801401
ECD	0.157996	-0.058176	0.068	0.118	1	ECD	0.801353
CHORDC1	0.158011	-0.102793	0.263	0.342	1	CHORDC1	0.801313
C1orf216	0.158222	-0.079682	0.09	0.144	1	C1orf216	0.800734
RARS	0.158261	-0.076701	0.143	0.209	1	RARS	0.800625
RNF149	0.158285	-0.10394	0.263	0.348	1	RNF149	0.800559
WASL	0.158335	0.0808855	0.128	0.08	1	WASL	0.800423
NOA1	0.158754	-0.036141	0.158	0.23	1	NOA1	0.799276
TFCP2	0.159083	-0.086405	0.098	0.15	1	TFCP2	0.798376
DENND1B	0.159236	-0.106059	0.113	0.166	1	DENND1B	0.79796
GANAB	0.15927	0.0957206	0.203	0.144	1	GANAB	0.797866
TRAPPC6A	0.159605	0.101985	0.511	0.433	1	TRAPPC6A	0.796953
PITPNM1	0.160025	0.0764621	0.12	0.075	1	PITPNM1	0.795812
MOB2	0.160088	-0.0865258	0.241	0.316	1	MOB2	0.795641
NOL10	0.160154	0.110624	0.211	0.16	1	NOL10	0.795463
ARHGDIB	0.160203	0.0678922	0.992	0.979	1	ARHGDIB	0.795329
MBD1	0.160219	0.0791452	0.165	0.112	1	MBD1	0.795285
SEC23IP	0.160337	-0.0798324	0.098	0.15	1	SEC23IP	0.794967
TOE1	0.160386	-0.0820615	0.068	0.112	1	TOE1	0.794834
PGPEP1	0.160386	-0.102054	0.068	0.112	1	PGPEP1	0.794834
GOLGA3	0.160652	-0.0908417	0.12	0.176	1	GOLGA3	0.794114
CITED2	0.160674	-0.0991393	0.211	0.278	1	CITED2	0.794056
DGKD	0.160747	0.0981048	0.12	0.075	1	DGKD	0.793857
PDPK1	0.160836	0.101058	0.165	0.112	1	PDPK1	0.793617
EPS8L2	0.160886	-0.0544826	0.06	0.107	1	EPS8L2	0.793481
RPL37A	0.161118	-0.0371362	1	1	1	RPL37A	0.792856
MFSD10	0.161166	-0.128506	0.278	0.337	1	MFSD10	0.792728
DECR1	0.161532	0.0880197	0.481	0.396	1	DECR1	0.791741
POLR3E	0.161563	0.10558	0.158	0.112	1	POLR3E	0.791658
NDUFA10	0.161809	0.119794	0.368	0.316	1	NDUFA10	0.790997
CENPB	0.161922	0.078011	0.233	0.166	1	CENPB	0.790693
HMCES	0.162009	-0.10396	0.256	0.332	1	HMCES	0.79046
MRPL44	0.162095	-0.0856637	0.173	0.235	1	MRPL44	0.790231
MRPL27	0.162246	0.105353	0.376	0.31	1	MRPL27	0.789826
FAM192A	0.162903	0.126097	0.271	0.209	1	FAM192A	0.78807
TMED4	0.162925	-0.0977629	0.429	0.487	1	TMED4	0.788011
CREBBP	0.163136	-0.0894991	0.188	0.257	1	CREBBP	0.787449
SF3A2	0.163213	0.0605579	0.256	0.182	1	SF3A2	0.787246
SLC25A32	0.163701	-0.0439133	0.068	0.118	1	SLC25A32	0.785949
AAGAB	0.163823	-0.0933941	0.098	0.15	1	AAGAB	0.785626
HDAC4	0.163835	0.0604121	0.15	0.096	1	HDAC4	0.785592
SPTLC2	0.164104	-0.0579435	0.075	0.123	1	SPTLC2	0.78488
RAB3GAP2	0.164114	-0.0446082	0.135	0.203	1	RAB3GAP2	0.784855
LGALS9	0.164556	0.0819552	0.293	0.219	1	LGALS9	0.783686
SLC39A1	0.164676	0.136095	0.211	0.15	1	SLC39A1	0.783371
PPP1R15B	0.16468	0.0828914	0.15	0.102	1	PPP1R15B	0.783359
ERCC4	0.164784	-0.0741474	0.098	0.15	1	ERCC4	0.783086
SSH2	0.164815	0.0978615	0.256	0.193	1	SSH2	0.783004
FOSL2	0.165337	0.088076	0.15	0.102	1	FOSL2	0.78163
VPS16	0.165502	-0.0864649	0.068	0.112	1	VPS16	0.781198
MLLT3	0.165658	-0.101943	0.248	0.31	1	MLLT3	0.780788
THAP1	0.165988	-0.0992531	0.203	0.262	1	THAP1	0.779923
AMD1	0.166197	0.06198	0.391	0.31	1	AMD1	0.779377
THAP3	0.166242	-0.071265	0.068	0.112	1	THAP3	0.779258
VAMP5	0.166562	0.0699119	0.744	0.652	1	VAMP5	0.778424
LINC00909	0.166571	0.0869449	0.188	0.134	1	LINC00909	0.778399
TUFM	0.166612	0.103135	0.654	0.626	1	TUFM	0.778294
AHSA1	0.166716	0.130242	0.383	0.321	1	AHSA1	0.778021
CHCHD3	0.16681	0.121205	0.173	0.123	1	CHCHD3	0.777779
HTATIP2	0.166984	0.0735596	0.586	0.503	1	HTATIP2	0.777325
LGALS1	0.167446	0.222073	0.782	0.759	1	LGALS1	0.776126
FOXO1	0.167529	0.142501	0.376	0.299	1	FOXO1	0.775911
GCA	0.167895	0.102564	0.211	0.16	1	GCA	0.774963
MTHFD1	0.167977	0.0724885	0.135	0.086	1	MTHFD1	0.77475
ARRDC1	0.167993	0.11575	0.338	0.273	1	ARRDC1	0.77471
LGALS3BP	0.168023	0.109727	0.18	0.128	1	LGALS3BP	0.774631
MCRS1	0.168102	-0.066794	0.135	0.198	1	MCRS1	0.774428
STK24	0.168222	0.14592	0.421	0.348	1	STK24	0.774117
VMP1	0.16827	0.0761973	0.94	0.904	1	VMP1	0.773993
CD82	0.168312	0.0717018	0.286	0.214	1	CD82	0.773885
RPL29	0.168574	-0.0598607	1	1	1	RPL29	0.77321
CAPZA2	0.168637	0.139771	0.444	0.385	1	CAPZA2	0.773046
NVL	0.16865	0.0909197	0.15	0.102	1	NVL	0.773015
AP002387.2	0.168667	-0.066748	0.113	0.166	1	AP002387.2	0.77297
P4HTM	0.168669	0.098569	0.158	0.107	1	P4HTM	0.772966
STT3A	0.168855	0.078866	0.12	0.075	1	STT3A	0.772487
TMEM183A	0.169058	0.0977106	0.278	0.214	1	TMEM183A	0.771963
C20orf27	0.16923	-0.0728066	0.068	0.112	1	C20orf27	0.771522
H2AFY	0.169296	0.0752428	0.594	0.529	1	H2AFY	0.771354
TMSB4X	0.169333	0.0382467	1	1	1	TMSB4X	0.771258
TRA2A	0.169758	0.14484	0.338	0.283	1	TRA2A	0.77017
CLASP2	0.169809	-0.0532496	0.075	0.123	1	CLASP2	0.770038
SEL1L	0.169986	-0.0802927	0.15	0.209	1	SEL1L	0.769588
ZNF654	0.170011	0.0448578	0.143	0.091	1	ZNF654	0.769524
43898	0.170428	0.072961	0.113	0.07	1	43898	0.768458
ZDHHC20	0.170945	0.0627996	0.165	0.112	1	ZDHHC20	0.767144
CRKL	0.171118	0.0725284	0.12	0.075	1	CRKL	0.766705
MPST	0.171338	-0.131234	0.218	0.283	1	MPST	0.766146
FTSJ1	0.171452	0.0751614	0.105	0.064	1	FTSJ1	0.765859
EXOSC7	0.171479	-0.0984636	0.158	0.214	1	EXOSC7	0.765789
SLC41A3	0.171625	0.11454	0.165	0.118	1	SLC41A3	0.76542
ATOX1	0.171748	0.134054	0.368	0.31	1	ATOX1	0.765107
MARK2	0.17176	-0.101972	0.158	0.214	1	MARK2	0.765079
HYOU1	0.171956	0.0702835	0.128	0.08	1	HYOU1	0.764583
MTM1	0.171994	0.0835643	0.113	0.07	1	MTM1	0.764487
SNX14	0.172015	0.11796	0.226	0.171	1	SNX14	0.764433
ZC3H8	0.172083	-0.122394	0.211	0.273	1	ZC3H8	0.764263
RNF216	0.172185	0.0947069	0.248	0.193	1	RNF216	0.764006
PPP2CA	0.172188	0.0832384	0.406	0.332	1	PPP2CA	0.763996
PRKCQ	0.172341	0.0843654	0.293	0.23	1	PRKCQ	0.763612
GIMAP6	0.172524	-0.090341	0.256	0.321	1	GIMAP6	0.763151
PGAP1	0.172696	0.0606294	0.128	0.08	1	PGAP1	0.762717
ILF3	0.172962	-0.0724475	0.331	0.417	1	ILF3	0.76205
TAF1	0.172981	0.0672811	0.135	0.086	1	TAF1	0.762002
GATAD1	0.173048	-0.0674761	0.135	0.198	1	GATAD1	0.761834
ARID4B	0.173103	0.0792513	0.729	0.69	1	ARID4B	0.761695
HCFC1R1	0.173126	-0.0507323	0.098	0.155	1	HCFC1R1	0.761637
SPNS3	0.173404	0.075573	0.12	0.075	1	SPNS3	0.760941
DNAJC30	0.173545	-0.0982776	0.105	0.155	1	DNAJC30	0.760588
PIP4K2A	0.173982	-0.0853815	0.278	0.348	1	PIP4K2A	0.759496
INTS3	0.174185	0.095023	0.128	0.086	1	INTS3	0.75899
UBQLN1	0.174426	-0.0851292	0.203	0.273	1	UBQLN1	0.758388
MRGBP	0.174452	-0.0631365	0.113	0.171	1	MRGBP	0.758323
GIMAP2	0.174453	0.0846006	0.406	0.321	1	GIMAP2	0.758321
AGAP2	0.174856	0.0648389	0.165	0.112	1	AGAP2	0.75732
ARL4A	0.174932	-0.0634388	0.083	0.134	1	ARL4A	0.757131
NT5C	0.175177	0.0882413	0.647	0.561	1	NT5C	0.756523
SYNE2	0.175178	0.0964731	0.947	0.893	1	SYNE2	0.756521
VMA21	0.175423	-0.115982	0.233	0.299	1	VMA21	0.755913
TOGARAM1	0.175682	0.0785139	0.128	0.08	1	TOGARAM1	0.755273
FLYWCH2	0.175697	0.0925941	0.218	0.16	1	FLYWCH2	0.755235
KIAA1468	0.175778	-0.0356865	0.098	0.155	1	KIAA1468	0.755036
GLYR1	0.175935	0.09214	0.241	0.182	1	GLYR1	0.754647
FEM1B	0.1761	-0.0719764	0.068	0.112	1	FEM1B	0.754241
BTF3L4	0.176499	-0.112124	0.226	0.283	1	BTF3L4	0.753258
COMT	0.176673	0.123204	0.414	0.332	1	COMT	0.75283
BRCC3	0.176729	0.0544461	0.173	0.118	1	BRCC3	0.752693
RPS20	0.177071	-0.0576299	0.985	1	1	RPS20	0.751853
TNFRSF10A	0.177109	0.101482	0.203	0.155	1	TNFRSF10A	0.75176
RPP25L	0.177265	0.0921654	0.211	0.155	1	RPP25L	0.751376
FAM111A	0.17734	-0.106694	0.226	0.289	1	FAM111A	0.751193
MMP25-AS1	0.177344	-0.065159	0.12	0.171	1	MMP25-AS1	0.751185
TMEM87A	0.17742	0.0692599	0.406	0.316	1	TMEM87A	0.750999
PPP3CB	0.177502	0.0883283	0.203	0.15	1	PPP3CB	0.750797
ASCC3	0.177506	-0.105879	0.256	0.316	1	ASCC3	0.750786
ST6GALNAC4	0.177654	-0.0713735	0.068	0.112	1	ST6GALNAC4	0.750424
TMEM141	0.177846	0.0823447	0.233	0.171	1	TMEM141	0.749955
RPL18A	0.177859	-0.0617547	1	1	1	RPL18A	0.749925
GBP4	0.178126	0.167103	0.474	0.439	1	GBP4	0.749273
POP7	0.178367	0.0974917	0.278	0.214	1	POP7	0.748687
PPP6R3	0.17844	0.10537	0.241	0.182	1	PPP6R3	0.748508
NUCKS1	0.178469	-0.0780609	0.594	0.668	1	NUCKS1	0.748437
PREPL	0.178835	0.0162962	0.135	0.086	1	PREPL	0.747548
KLHL36	0.178871	-0.077122	0.218	0.294	1	KLHL36	0.747459
LAMP1	0.178964	0.111474	0.361	0.289	1	LAMP1	0.747235
TTC17	0.179112	-0.100784	0.195	0.257	1	TTC17	0.746875
LTA	0.179253	-0.12877	0.12	0.171	1	LTA	0.746534
TOP3A	0.179312	-0.0752434	0.06	0.102	1	TOP3A	0.74639
PARP1	0.17942	-0.118254	0.692	0.754	1	PARP1	0.74613
RPL7L1	0.179801	0.10903	0.414	0.364	1	RPL7L1	0.745209
PHF20	0.179953	-0.0817154	0.226	0.305	1	PHF20	0.744842
PSMB2	0.180339	0.102136	0.669	0.604	1	PSMB2	0.743909
OGFR	0.180349	-0.0687227	0.218	0.289	1	OGFR	0.743886
MRPS36	0.180437	0.104785	0.391	0.326	1	MRPS36	0.743675
PKIA	0.180534	0.0830469	0.18	0.128	1	PKIA	0.74344
HLA-DQB1	0.180625	0.118699	0.669	0.642	1	HLA-DQB1	0.743222
REXO1	0.180965	-0.0787689	0.06	0.102	1	REXO1	0.742405
XPC	0.181482	-0.100121	0.241	0.294	1	XPC	0.741167
AQR	0.18157	-0.0966707	0.165	0.219	1	AQR	0.740957
BAG2	0.181585	-0.0592507	0.068	0.112	1	BAG2	0.740919
ACTA2	0.181663	0.105364	0.128	0.086	1	ACTA2	0.740733
GFM1	0.181735	-0.0611002	0.135	0.198	1	GFM1	0.740561
KLHDC4	0.181823	0.0718343	0.18	0.128	1	KLHDC4	0.740352
DDX18	0.182041	0.0739029	0.564	0.476	1	DDX18	0.73983
FBXO8	0.182115	-0.0672916	0.098	0.15	1	FBXO8	0.739654
ERG28	0.182441	0.0816441	0.218	0.16	1	ERG28	0.738877
DKC1	0.182455	0.086362	0.195	0.139	1	DKC1	0.738845
ZNF292	0.182619	0.13805	0.654	0.647	1	ZNF292	0.738455
RALGAPA1	0.182632	-0.0829659	0.165	0.23	1	RALGAPA1	0.738423
STK16	0.182765	-0.0766949	0.113	0.166	1	STK16	0.738108
FKBP1A	0.18283	-0.0827018	0.564	0.658	1	FKBP1A	0.737953
CTSH	0.182919	0.139214	0.256	0.198	1	CTSH	0.737742
HIGD1A	0.182923	0.098683	0.271	0.214	1	HIGD1A	0.737731
EIF6	0.183064	-0.0890754	0.323	0.401	1	EIF6	0.737398
PARVB	0.183176	-0.0812733	0.068	0.112	1	PARVB	0.737132
MRPS16	0.183318	0.110542	0.346	0.299	1	MRPS16	0.736796
ZNF605	0.183466	-0.083275	0.06	0.102	1	ZNF605	0.736444
KCNQ1OT1	0.183473	-0.0224293	0.105	0.16	1	KCNQ1OT1	0.736429
METTL6	0.183819	0.0666146	0.15	0.102	1	METTL6	0.73561
KLHL2	0.183847	0.0945636	0.211	0.155	1	KLHL2	0.735544
CALM3	0.183965	0.141894	0.789	0.754	1	CALM3	0.735264
PCF11	0.184115	-0.0995211	0.271	0.348	1	PCF11	0.73491
MIA3	0.184202	-0.109677	0.316	0.38	1	MIA3	0.734705
JMJD8	0.184305	-0.069162	0.06	0.102	1	JMJD8	0.734462
TALDO1	0.184389	-0.0774119	0.647	0.706	1	TALDO1	0.734265
RNH1	0.184513	0.108134	0.526	0.439	1	RNH1	0.733972
RSRP1	0.184603	-0.0341832	0.654	0.706	1	RSRP1	0.733762
TMEM168	0.184721	-0.054941	0.075	0.123	1	TMEM168	0.733484
PAIP2	0.184937	-0.0853502	0.714	0.754	1	PAIP2	0.732975
WDR74	0.185063	-0.0808437	0.143	0.203	1	WDR74	0.732681
ADSS	0.185156	-0.094752	0.211	0.273	1	ADSS	0.732462
HGS	0.185423	-0.0583356	0.135	0.198	1	HGS	0.731836
DENND4C	0.185561	-0.103993	0.128	0.182	1	DENND4C	0.731513
ROCK2	0.186226	0.0930986	0.195	0.144	1	ROCK2	0.72996
RAB11B	0.186266	-0.102411	0.188	0.246	1	RAB11B	0.729867
PPP2R3C	0.186533	-0.107455	0.18	0.241	1	PPP2R3C	0.729243
FDX1	0.186585	0.0983379	0.391	0.326	1	FDX1	0.729123
TMEM159	0.18684	-0.065193	0.06	0.102	1	TMEM159	0.72853
VPS36	0.187134	-0.0914219	0.316	0.401	1	VPS36	0.727848
KLF12	0.187245	-0.0852394	0.098	0.144	1	KLF12	0.72759
CEP97	0.187245	-0.101322	0.098	0.144	1	CEP97	0.72759
HLA-E	0.187314	0.0677841	0.977	0.995	1	HLA-E	0.72743
PLPP5	0.187403	0.0705514	0.15	0.102	1	PLPP5	0.727223
PPIL1	0.187816	0.0976053	0.128	0.086	1	PPIL1	0.726267
BAG5	0.188002	-0.121501	0.233	0.283	1	BAG5	0.725838
MGA	0.188125	0.135445	0.195	0.144	1	MGA	0.725553
SRRD	0.188565	-0.0356117	0.12	0.176	1	SRRD	0.724538
PIP5K1C	0.188608	-0.0760723	0.083	0.128	1	PIP5K1C	0.724439
NDUFS8	0.188632	-0.0692962	0.496	0.54	1	NDUFS8	0.724384
FBXL5	0.188989	-0.0695861	0.083	0.128	1	FBXL5	0.723564
GFPT1	0.189028	0.0850741	0.188	0.134	1	GFPT1	0.723474
KDELR2	0.189061	0.0883748	0.489	0.406	1	KDELR2	0.723397
OGFRL1	0.189111	0.0743546	0.105	0.064	1	OGFRL1	0.723284
SELL	0.189712	0.111831	0.744	0.711	1	SELL	0.721905
RGS19	0.18985	-0.105321	0.406	0.487	1	RGS19	0.72159
BORCS8	0.189915	-0.0945738	0.143	0.198	1	BORCS8	0.72144
MPI	0.190043	-0.067932	0.09	0.139	1	MPI	0.721148
PSMB8	0.190078	0.0912837	0.887	0.85	1	PSMB8	0.721068
DTWD1	0.190115	-0.0905851	0.098	0.144	1	DTWD1	0.720983
MFSD14B	0.190259	-0.056875	0.06	0.102	1	MFSD14B	0.720654
PCYT2	0.190423	0.0807462	0.143	0.096	1	PCYT2	0.72028
CHRNB1	0.19046	-0.0541539	0.068	0.112	1	CHRNB1	0.720197
AFF1	0.190556	0.0780738	0.158	0.107	1	AFF1	0.719978
NSL1	0.190586	-0.0625437	0.203	0.278	1	NSL1	0.719909
RPS25	0.190824	-0.0498641	1	1	1	RPS25	0.719367
TFE3	0.19086	0.0456771	0.105	0.064	1	TFE3	0.719285
SH3BP5	0.190948	0.105936	0.436	0.374	1	SH3BP5	0.719084
PDE4A	0.190949	0.114779	0.128	0.086	1	PDE4A	0.719082
RPL10	0.191032	-0.0517348	1	1	1	RPL10	0.718894
SH2D2A	0.191454	0.146893	0.541	0.476	1	SH2D2A	0.717936
TMEM18	0.191655	0.0886259	0.188	0.134	1	TMEM18	0.717481
LAYN	0.191881	0.0701009	0.233	0.171	1	LAYN	0.716967
PCM1	0.191949	0.104	0.586	0.513	1	PCM1	0.716814
ALKBH3	0.191986	-0.0633712	0.06	0.102	1	ALKBH3	0.71673
SH2D1A	0.192011	0.117923	0.316	0.262	1	SH2D1A	0.716675
TLE3	0.192353	-0.0747879	0.128	0.187	1	TLE3	0.715901
SLC38A10	0.192494	0.101789	0.195	0.15	1	SLC38A10	0.715582
CDC40	0.192654	-0.118016	0.323	0.396	1	CDC40	0.715222
COMMD1	0.192781	0.100382	0.293	0.23	1	COMMD1	0.714937
TAPBP	0.192938	0.103193	0.662	0.626	1	TAPBP	0.714582
CCDC85B	0.193192	0.0924419	0.692	0.69	1	CCDC85B	0.714011
GLRX	0.193402	0.101531	0.85	0.791	1	GLRX	0.713538
EIF4A1	0.19374	0.0731352	0.421	0.353	1	EIF4A1	0.712781
OTUD4	0.193994	-0.0713997	0.105	0.155	1	OTUD4	0.712212
IDI1	0.194131	0.0659722	0.406	0.358	1	IDI1	0.711906
SRP9	0.194466	-0.119049	0.737	0.797	1	SRP9	0.711155
PSME3	0.194597	-0.053204	0.068	0.112	1	PSME3	0.710863
ARHGAP25	0.194694	-0.112347	0.361	0.417	1	ARHGAP25	0.710647
GPR174	0.194801	0.110943	0.316	0.257	1	GPR174	0.710408
NF1	0.194922	0.061149	0.241	0.182	1	NF1	0.710139
SUB1	0.195003	0.0574018	0.985	0.947	1	SUB1	0.709958
HNRNPM	0.19512	0.112554	0.744	0.636	1	HNRNPM	0.709698
PUS7L	0.195208	-0.0767538	0.226	0.299	1	PUS7L	0.709503
P2RY10	0.195379	0.102359	0.451	0.385	1	P2RY10	0.709123
CTBP1	0.195561	-0.0742846	0.15	0.209	1	CTBP1	0.708717
TUBB4B	0.195663	0.131411	0.489	0.439	1	TUBB4B	0.708492
MRPL18	0.195854	0.0946333	0.406	0.348	1	MRPL18	0.708067
ZNF26	0.195954	-0.0860037	0.098	0.144	1	ZNF26	0.707847
COA1	0.196336	0.0782348	0.353	0.294	1	COA1	0.707001
GPR183	0.196407	0.108414	0.436	0.374	1	GPR183	0.706843
CTNNBL1	0.196413	-0.0888328	0.211	0.273	1	CTNNBL1	0.70683
TNFAIP8L1	0.19644	-0.0690533	0.075	0.118	1	TNFAIP8L1	0.70677
ENDOV	0.196473	0.0755293	0.143	0.096	1	ENDOV	0.706697
NFATC2IP	0.196535	-0.0838044	0.271	0.342	1	NFATC2IP	0.70656
C7orf26	0.196633	0.0945713	0.12	0.08	1	C7orf26	0.706343
ZNF701	0.19713	-0.0654098	0.12	0.171	1	ZNF701	0.705247
ITM2B	0.197347	0.0698561	0.992	0.973	1	ITM2B	0.704769
THUMPD3-AS1	0.197568	-0.0717854	0.421	0.508	1	THUMPD3-AS1	0.704284
PDIA3	0.197751	0.110529	0.684	0.636	1	PDIA3	0.703881
CDK5RAP3	0.197817	0.108435	0.18	0.128	1	CDK5RAP3	0.703737
SMC2	0.197837	0.110617	0.195	0.144	1	SMC2	0.703694
NPM1	0.197987	0.071349	1	0.968	1	NPM1	0.703363
PPA2	0.198077	0.0515094	0.218	0.16	1	PPA2	0.703167
CLN8	0.198176	-0.0875987	0.098	0.144	1	CLN8	0.702948
CNOT10	0.198321	-0.0502693	0.113	0.171	1	CNOT10	0.702632
THAP6	0.198549	0.0900001	0.15	0.107	1	THAP6	0.702133
SLC35C1	0.198778	0.0706402	0.143	0.096	1	SLC35C1	0.701632
PSAP	0.198802	0.0773761	0.421	0.337	1	PSAP	0.701579
TCF12	0.198951	-0.0496663	0.075	0.123	1	TCF12	0.701255
AL357060.1	0.199009	-0.0381365	0.06	0.102	1	AL357060.1	0.701126
DENND1C	0.19901	-0.0747354	0.105	0.155	1	DENND1C	0.701125
RBBP6	0.199144	-0.0704447	0.286	0.353	1	RBBP6	0.700832
ZNF12	0.199156	-0.0953641	0.113	0.16	1	ZNF12	0.700806
DDX5	0.199273	-0.0400128	0.992	0.984	1	DDX5	0.700552
TMSB10	0.199273	0.0611987	1	1	1	TMSB10	0.700551
PIN4	0.199344	0.125342	0.383	0.332	1	PIN4	0.700397
CMAS	0.199463	-0.0700935	0.195	0.262	1	CMAS	0.700138
TOP2B	0.199554	0.0857752	0.459	0.39	1	TOP2B	0.69994
SLC9A9	0.199649	-0.0501636	0.068	0.112	1	SLC9A9	0.699732
RABEP2	0.199668	0.101914	0.15	0.107	1	RABEP2	0.699691
CDK19	0.1999	-0.0611872	0.06	0.102	1	CDK19	0.699186
DOPEY2	0.200075	0.0308748	0.12	0.075	1	DOPEY2	0.698808
TIMP1	0.200141	0.0928062	0.609	0.578	1	TIMP1	0.698664
RFXANK	0.200251	0.0928174	0.241	0.187	1	RFXANK	0.698426
JAGN1	0.200336	0.0818737	0.316	0.251	1	JAGN1	0.698241
TBK1	0.200441	0.108094	0.353	0.283	1	TBK1	0.698013
BIN1	0.200514	0.0811582	0.579	0.471	1	BIN1	0.697855
SENP5	0.20053	0.0868808	0.173	0.123	1	SENP5	0.697821
INSIG1	0.20058	-0.0476224	0.075	0.123	1	INSIG1	0.697713
STMP1	0.200642	-0.0765343	0.331	0.406	1	STMP1	0.697578
XRN2	0.201081	-0.0267692	0.579	0.674	1	XRN2	0.69663
ZNF83	0.201354	-0.0560745	0.068	0.112	1	ZNF83	0.696039
MIGA1	0.201507	-0.0521665	0.098	0.15	1	MIGA1	0.695709
MAPK13	0.201899	-0.0957233	0.188	0.257	1	MAPK13	0.694866
BIRC6	0.201971	0.107241	0.421	0.374	1	BIRC6	0.694711
SOCS4	0.20201	-0.109858	0.113	0.16	1	SOCS4	0.694627
CBWD5	0.20207	0.0876867	0.12	0.08	1	CBWD5	0.694497
PLEKHN1	0.20207	0.0831326	0.12	0.08	1	PLEKHN1	0.694497
PPP4R1	0.202204	-0.09341	0.068	0.107	1	PPP4R1	0.694209
FAM129B	0.202212	-0.0639854	0.075	0.118	1	FAM129B	0.694193
TCEAL4	0.202279	-0.0822839	0.256	0.316	1	TCEAL4	0.69405
RBM23	0.20235	-0.081312	0.18	0.241	1	RBM23	0.693897
KIAA0040	0.202388	0.0913282	0.444	0.385	1	KIAA0040	0.693816
HPRT1	0.202483	0.12408	0.376	0.316	1	HPRT1	0.693611
RNF34	0.202787	-0.0416577	0.218	0.289	1	RNF34	0.69296
PTGES2	0.202954	-0.0702844	0.18	0.241	1	PTGES2	0.692603
LSM14A	0.202976	-0.0941219	0.398	0.465	1	LSM14A	0.692556
WBP1L	0.203021	0.0625929	0.15	0.102	1	WBP1L	0.692458
ATF7	0.20307	-0.0339787	0.068	0.112	1	ATF7	0.692354
PAN3	0.20309	-0.0481899	0.105	0.16	1	PAN3	0.692311
DOK1	0.203227	-0.105149	0.12	0.166	1	DOK1	0.692019
RBM5	0.203607	0.0555854	0.353	0.283	1	RBM5	0.691207
CUL3	0.203698	0.140839	0.429	0.38	1	CUL3	0.691013
VAMP4	0.203738	-0.0993249	0.233	0.294	1	VAMP4	0.690929
LLGL2	0.203867	0.0767614	0.128	0.086	1	LLGL2	0.690652
DAP3	0.204137	-0.0473822	0.331	0.406	1	DAP3	0.690079
POLH	0.204954	-0.0900209	0.083	0.123	1	POLH	0.688344
ZYG11B	0.205	0.0853952	0.173	0.128	1	ZYG11B	0.688245
KIF21A	0.205088	0.0780406	0.135	0.091	1	KIF21A	0.688059
GPATCH2L	0.205209	-0.0871865	0.286	0.358	1	GPATCH2L	0.687804
NHP2	0.205225	-0.0895001	0.338	0.406	1	NHP2	0.687769
TMEM256	0.205727	-0.0891684	0.241	0.299	1	TMEM256	0.686708
SYNC	0.205898	0.0930531	0.135	0.091	1	SYNC	0.686347
LAX1	0.205994	0.0884961	0.263	0.209	1	LAX1	0.686146
RANGAP1	0.20607	0.109575	0.173	0.128	1	RANGAP1	0.685986
FAM204A	0.206154	0.110735	0.406	0.353	1	FAM204A	0.685809
MAP3K7	0.206594	-0.0738978	0.068	0.107	1	MAP3K7	0.684882
ANKRD27	0.206594	-0.0795035	0.068	0.107	1	ANKRD27	0.684882
BTF3	0.206667	-0.0504316	0.977	1	1	BTF3	0.684729
RPS12	0.206667	-0.051096	1	1	1	RPS12	0.684728
CLTA	0.206745	0.0516949	0.797	0.797	1	CLTA	0.684565
THEMIS2	0.207032	0.101104	0.226	0.176	1	THEMIS2	0.683962
CCNDBP1	0.207146	-0.0532493	0.564	0.658	1	CCNDBP1	0.683723
SFT2D2	0.207416	0.0649874	0.195	0.139	1	SFT2D2	0.683158
ADAT2	0.20748	-0.087429	0.068	0.107	1	ADAT2	0.683023
RPS19	0.20755	-0.0575931	1	1	1	RPS19	0.682877
SLC35E3	0.207609	0.0487105	0.18	0.128	1	SLC35E3	0.682753
PTP4A1	0.207609	-0.0958747	0.12	0.171	1	PTP4A1	0.682753
LBH	0.207649	-0.0653754	0.586	0.674	1	LBH	0.68267
NUDC	0.207735	-0.0834538	0.474	0.535	1	NUDC	0.682491
SLC12A7	0.208369	-0.0549626	0.068	0.107	1	SLC12A7	0.681166
ERH	0.208455	0.072256	0.812	0.717	1	ERH	0.680987
AHCTF1	0.208594	-0.0789873	0.135	0.187	1	AHCTF1	0.680698
VPS13D	0.208794	-0.0720098	0.098	0.144	1	VPS13D	0.680283
PLA2G16	0.208876	0.0828724	0.271	0.209	1	PLA2G16	0.680111
CEPT1	0.208942	0.0903206	0.173	0.128	1	CEPT1	0.679975
TGFBR2	0.208994	-0.0960947	0.09	0.134	1	TGFBR2	0.679867
ZNF80	0.209037	0.148562	0.18	0.128	1	ZNF80	0.679778
RSBN1	0.209184	-0.0843404	0.263	0.337	1	RSBN1	0.679472
MALAT1	0.209324	0.0350092	1	1	1	MALAT1	0.679181
XRN1	0.209823	0.126498	0.481	0.433	1	XRN1	0.678147
HMGXB3	0.209825	0.0270825	0.158	0.107	1	HMGXB3	0.678142
FAS	0.209865	0.104593	0.496	0.449	1	FAS	0.67806
TNRC6A	0.209946	-0.0990214	0.241	0.299	1	TNRC6A	0.677892
IKZF4	0.210017	0.0983451	0.504	0.46	1	IKZF4	0.677746
ARL6IP5	0.210181	0.0925188	0.94	0.952	1	ARL6IP5	0.677407
TXNRD1	0.210239	-0.092521	0.233	0.294	1	TXNRD1	0.677286
LAMTOR1	0.210349	0.0951299	0.489	0.455	1	LAMTOR1	0.67706
UBAC2	0.210352	-0.0795842	0.226	0.294	1	UBAC2	0.677053
RPS15A	0.210438	-0.0377337	1	1	1	RPS15A	0.676876
CD5	0.210958	0.0856737	0.391	0.337	1	CD5	0.675804
CYBA	0.211109	0.0689734	0.985	1	1	CYBA	0.675494
CD2	0.211304	0.0693202	0.947	0.952	1	CD2	0.675093
TXLNG	0.211511	0.0906693	0.15	0.107	1	TXLNG	0.674667
CALM1	0.211556	0.0714768	0.985	0.995	1	CALM1	0.674574
WASHC5	0.211748	-0.0517759	0.06	0.102	1	WASHC5	0.67418
RASGRP2	0.211809	-0.0853103	0.271	0.337	1	RASGRP2	0.674055
RRP15	0.211902	-0.0971768	0.098	0.144	1	RRP15	0.673866
TMEM43	0.212071	-0.0513088	0.113	0.166	1	TMEM43	0.67352
TNPO1	0.212104	0.0677662	0.263	0.203	1	TNPO1	0.673451
ELMOD3	0.212233	-0.0707421	0.113	0.16	1	ELMOD3	0.673187
AL031846.2	0.212394	0.0892658	0.12	0.08	1	AL031846.2	0.672857
MINK1	0.212463	0.0657289	0.135	0.091	1	MINK1	0.672717
NCBP3	0.212835	0.0370795	0.301	0.23	1	NCBP3	0.671957
NCKAP1L	0.21306	0.0976543	0.474	0.417	1	NCKAP1L	0.671498
MYH9	0.213241	0.0780593	0.759	0.706	1	MYH9	0.671128
RAD1	0.213257	-0.0793718	0.075	0.118	1	RAD1	0.671097
STRN	0.213303	-0.0911088	0.12	0.166	1	STRN	0.671003
APOL1	0.213454	0.0809178	0.165	0.118	1	APOL1	0.670697
CFP	0.213615	-0.044981	0.06	0.102	1	CFP	0.670368
ACTR1A	0.213641	-0.099606	0.128	0.176	1	ACTR1A	0.670316
TCAIM	0.213761	-0.078562	0.068	0.107	1	TCAIM	0.670072
APOL3	0.214025	0.0902878	0.376	0.316	1	APOL3	0.669535
PSME4	0.214074	0.0813004	0.18	0.134	1	PSME4	0.669436
MFGE8	0.214124	-0.0675354	0.075	0.118	1	MFGE8	0.669334
PSMA6	0.214127	-0.0454608	0.083	0.128	1	PSMA6	0.669328
POC5	0.214127	-0.0615059	0.083	0.128	1	POC5	0.669328
EIF2AK2	0.214314	0.12884	0.391	0.326	1	EIF2AK2	0.66895
VRK3	0.214627	-0.0726854	0.105	0.155	1	VRK3	0.668316
SLTM	0.214776	-0.0839091	0.564	0.594	1	SLTM	0.668014
EIF3L	0.214973	-0.128248	0.609	0.626	1	EIF3L	0.667616
NFATC1	0.214994	-0.0612238	0.075	0.118	1	NFATC1	0.667573
TPT1	0.215165	-0.0481421	1	1	1	TPT1	0.667229
RNF214	0.215485	-0.0857056	0.143	0.198	1	RNF214	0.666583
RAD21	0.215496	0.0316251	0.647	0.551	1	RAD21	0.66656
MAP7D1	0.215669	0.0819462	0.346	0.283	1	MAP7D1	0.666212
C1RL-AS1	0.215801	0.0614617	0.135	0.091	1	C1RL-AS1	0.665947
AKIP1	0.215812	0.0824446	0.241	0.187	1	AKIP1	0.665924
NKAP	0.215888	0.0618985	0.286	0.225	1	NKAP	0.665771
LRRFIP1	0.215942	-0.0812096	0.669	0.754	1	LRRFIP1	0.665663
RNF125	0.216145	-0.0541662	0.248	0.316	1	RNF125	0.665254
WBP2	0.216153	-0.0751934	0.226	0.294	1	WBP2	0.665238
SETX	0.216226	-0.0696602	0.414	0.481	1	SETX	0.665092
CCT4	0.216439	-0.0660966	0.511	0.604	1	CCT4	0.664664
HAVCR2	0.216641	0.0461919	0.135	0.091	1	HAVCR2	0.664258
C12orf76	0.216714	-0.0527627	0.128	0.182	1	C12orf76	0.664113
RYK	0.216742	-0.0541285	0.075	0.118	1	RYK	0.664058
MTO1	0.21677	0.109342	0.143	0.102	1	MTO1	0.664001
HPS1	0.216937	0.0754113	0.203	0.15	1	HPS1	0.663667
RPL32	0.216985	-0.0545662	1	1	1	RPL32	0.66357
VPS13B	0.217107	-0.0652972	0.09	0.134	1	VPS13B	0.663326
PPP3R1	0.217176	-0.0509936	0.09	0.139	1	PPP3R1	0.663188
GEMIN7	0.21718	-0.0343498	0.068	0.112	1	GEMIN7	0.66318
TBC1D5	0.217433	-0.0805274	0.158	0.209	1	TBC1D5	0.662675
AKR1B1	0.217477	0.0915683	0.233	0.182	1	AKR1B1	0.662587
LLPH	0.217515	-0.0437575	0.278	0.358	1	LLPH	0.662511
ATMIN	0.21755	-0.071571	0.143	0.198	1	ATMIN	0.662441
FKBP11	0.217614	0.118339	0.226	0.182	1	FKBP11	0.662313
MSH3	0.217664	-0.0804291	0.135	0.193	1	MSH3	0.662214
CD69	0.217667	0.120083	0.286	0.23	1	CD69	0.662208
UCHL5	0.2177	0.0465491	0.218	0.16	1	UCHL5	0.662142
RHEB	0.218235	0.0715214	0.466	0.401	1	RHEB	0.661075
MYO9B	0.218446	-0.107317	0.188	0.246	1	MYO9B	0.660656
CRLS1	0.218807	-0.0565829	0.09	0.139	1	CRLS1	0.65994
TAF15	0.21882	0.0954882	0.474	0.417	1	TAF15	0.659914
MTPN	0.219278	0.150364	0.436	0.412	1	MTPN	0.659004
LPIN1	0.219483	-0.0511424	0.143	0.203	1	LPIN1	0.658599
HAX1	0.220015	0.113512	0.549	0.497	1	HAX1	0.657548
PRKAR2A	0.220015	-0.027601	0.188	0.262	1	PRKAR2A	0.657547
CBFA2T2	0.220027	-0.0614882	0.083	0.128	1	CBFA2T2	0.657524
LEMD3	0.220639	0.077142	0.18	0.134	1	LEMD3	0.656318
EIF4H	0.22074	-0.0723318	0.308	0.385	1	EIF4H	0.656119
KCTD9	0.220834	0.0579498	0.12	0.08	1	KCTD9	0.655935
KIAA2026	0.22098	0.0821923	0.256	0.198	1	KIAA2026	0.655648
ITGB7	0.22098	0.0896871	0.534	0.46	1	ITGB7	0.655646
AP5M1	0.221008	-0.0804875	0.15	0.203	1	AP5M1	0.655591
AC004865.2	0.221306	-0.0345497	0.083	0.128	1	AC004865.2	0.655007
GPR82	0.221323	-0.0835065	0.248	0.31	1	GPR82	0.654973
B3GNTL1	0.221333	0.0738402	0.128	0.086	1	B3GNTL1	0.654954
YRDC	0.221425	-0.0634846	0.098	0.144	1	YRDC	0.654772
C6orf203	0.221583	-0.0617064	0.105	0.155	1	C6orf203	0.654463
ACTN4	0.221628	0.0837531	0.639	0.583	1	ACTN4	0.654375
ARRB2	0.221657	-0.0714408	0.256	0.332	1	ARRB2	0.654319
ALOX5AP	0.221995	0.129749	0.571	0.508	1	ALOX5AP	0.653656
ITPR1	0.222652	0.0706369	0.128	0.086	1	ITPR1	0.652374
SF3B1	0.222795	0.0983988	0.737	0.717	1	SF3B1	0.652094
SMIM30	0.222824	-0.0738491	0.113	0.16	1	SMIM30	0.652037
BLMH	0.223042	-0.0648574	0.098	0.144	1	BLMH	0.651613
GHITM	0.223066	-0.0670154	0.594	0.615	1	GHITM	0.651566
GBA2	0.223094	0.0910808	0.12	0.08	1	GBA2	0.651512
SLC33A1	0.223094	-0.0889105	0.075	0.112	1	SLC33A1	0.651512
SCAF4	0.223151	-0.0454189	0.105	0.155	1	SCAF4	0.651402
ZMYM2	0.223389	0.0636841	0.241	0.176	1	ZMYM2	0.650938
MRPL15	0.223536	-0.0813237	0.158	0.209	1	MRPL15	0.650652
DOK2	0.223793	0.0736077	0.737	0.69	1	DOK2	0.650154
TMEM120B	0.223804	0.0801345	0.226	0.171	1	TMEM120B	0.650132
FDXR	0.224003	0.0713268	0.12	0.08	1	FDXR	0.649746
HIVEP1	0.224096	-0.0326353	0.06	0.102	1	HIVEP1	0.649566
SLC38A2	0.224146	0.0320659	0.301	0.23	1	SLC38A2	0.649469
RPL19	0.224378	-0.0430371	1	1	1	RPL19	0.64902
RRAGC	0.224667	-0.0545086	0.098	0.144	1	RRAGC	0.64846
TIPIN	0.224844	-0.0711805	0.068	0.107	1	TIPIN	0.648118
SERTAD1	0.224909	0.0848777	0.218	0.166	1	SERTAD1	0.647993
GNL1	0.224975	0.0677455	0.165	0.118	1	GNL1	0.647867
CORO7	0.225025	0.125812	0.271	0.225	1	CORO7	0.647769
ATXN2L	0.225117	-0.062912	0.135	0.193	1	ATXN2L	0.647591
PRPSAP1	0.225168	0.0748137	0.211	0.16	1	PRPSAP1	0.647493
ATP5PB	0.225697	-0.105733	0.526	0.61	1	ATP5PB	0.646474
ZC3H12A	0.22599	-0.0626414	0.105	0.15	1	ZC3H12A	0.64591
ARL16	0.226053	-0.0468787	0.165	0.23	1	ARL16	0.645789
CBLB	0.226164	0.0514072	0.188	0.139	1	CBLB	0.645576
COIL	0.226242	-0.0763312	0.135	0.187	1	COIL	0.645427
SNRNP70	0.226277	0.097265	0.451	0.39	1	SNRNP70	0.645359
ACTR10	0.226278	0.0636103	0.301	0.241	1	ACTR10	0.645358
STK38	0.226395	-0.0780075	0.376	0.439	1	STK38	0.645134
ELP3	0.226731	0.0655546	0.113	0.075	1	ELP3	0.644489
CHST7	0.226821	-0.0744642	0.173	0.23	1	CHST7	0.644317
TOMM22	0.227263	0.0599567	0.466	0.401	1	TOMM22	0.643471
JPX	0.227319	0.0703183	0.489	0.412	1	JPX	0.643364
IFNGR1	0.227332	-0.0805938	0.135	0.182	1	IFNGR1	0.643339
NUTM2B-AS1	0.227346	-0.087569	0.331	0.401	1	NUTM2B-AS1	0.643313
CSNK1A1	0.227422	-0.0719409	0.564	0.636	1	CSNK1A1	0.643168
REST	0.227428	0.115312	0.459	0.401	1	REST	0.643156
ZNF830	0.2275	-0.0439938	0.241	0.31	1	ZNF830	0.643019
TRAP1	0.227678	-0.0697366	0.068	0.107	1	TRAP1	0.642678
MTHFD2	0.227789	0.0758316	0.323	0.257	1	MTHFD2	0.642467
ERGIC2	0.227859	0.0683926	0.444	0.396	1	ERGIC2	0.642335
MXI1	0.227901	-0.0567613	0.105	0.155	1	MXI1	0.642254
TMEM199	0.22824	-0.0760325	0.12	0.171	1	TMEM199	0.641608
IL2RB	0.22846	0.0244355	0.571	0.465	1	IL2RB	0.64119
AC108463.3	0.228586	0.0760693	0.12	0.08	1	AC108463.3	0.64095
RASA3	0.228837	0.0432742	0.466	0.401	1	RASA3	0.640474
MAN1A2	0.228998	-0.100865	0.271	0.337	1	MAN1A2	0.640168
IFRD2	0.229197	0.0753461	0.143	0.102	1	IFRD2	0.639791
NEDD1	0.22921	-0.06856	0.105	0.15	1	NEDD1	0.639766
AGFG1	0.229298	0.0736032	0.271	0.209	1	AGFG1	0.639599
CD55	0.229521	-0.12817	0.331	0.369	1	CD55	0.639178
PHF12	0.229544	-0.094729	0.135	0.182	1	PHF12	0.639134
KDM6A	0.229705	0.0722846	0.165	0.118	1	KDM6A	0.638829
SMIM7	0.230077	-0.085349	0.301	0.358	1	SMIM7	0.638128
CALCOCO2	0.230101	0.111713	0.474	0.412	1	CALCOCO2	0.638082
KDM4C	0.230126	-0.0928413	0.09	0.134	1	KDM4C	0.638034
EIF4B	0.23015	-0.0939086	0.752	0.738	1	EIF4B	0.63799
STOML2	0.230432	-0.0839103	0.346	0.406	1	STOML2	0.637458
SPOP	0.230432	-0.0610548	0.248	0.316	1	SPOP	0.637457
SAP30	0.230501	0.0654399	0.165	0.118	1	SAP30	0.637328
ZNF428	0.23079	-0.113396	0.248	0.299	1	ZNF428	0.636783
PIEZO1	0.231157	-0.0321049	0.143	0.209	1	PIEZO1	0.636094
RIF1	0.231237	-0.112985	0.286	0.342	1	RIF1	0.635942
PIGM	0.231291	-0.031221	0.083	0.128	1	PIGM	0.635841
STAT4	0.231373	0.100674	0.188	0.139	1	STAT4	0.635688
ACAD8	0.231496	-0.0587511	0.068	0.107	1	ACAD8	0.635456
RPL15	0.23171	-0.0368953	1	1	1	RPL15	0.635056
MKNK1	0.231835	-0.0330575	0.113	0.166	1	MKNK1	0.634821
TMEM59	0.231994	0.0742854	0.835	0.775	1	TMEM59	0.634524
DDX1	0.232055	0.0709479	0.158	0.112	1	DDX1	0.63441
SRSF1	0.232073	0.0907348	0.286	0.23	1	SRSF1	0.634375
ITGAE	0.232129	0.151492	0.293	0.235	1	ITGAE	0.634271
NAA15	0.232225	-0.084883	0.15	0.203	1	NAA15	0.634091
UBALD1	0.232458	-0.0487104	0.068	0.107	1	UBALD1	0.633656
CDK17	0.232458	-0.0492005	0.068	0.107	1	CDK17	0.633656
SYNE1	0.232561	-0.0680529	0.353	0.417	1	SYNE1	0.633463
ENOPH1	0.232567	-0.0636355	0.158	0.209	1	ENOPH1	0.633451
DSTN	0.232615	-0.113837	0.346	0.412	1	DSTN	0.633363
CD27	0.233027	-0.0868652	0.797	0.84	1	CD27	0.632593
UBASH3B	0.233236	0.0626983	0.12	0.08	1	UBASH3B	0.632204
BARD1	0.233281	-0.0760574	0.105	0.15	1	BARD1	0.63212
CDKN2AIP	0.233302	0.0887261	0.248	0.203	1	CDKN2AIP	0.632082
FAM50B	0.233853	-0.0597784	0.075	0.118	1	FAM50B	0.631057
SNTB2	0.233949	0.110025	0.226	0.176	1	SNTB2	0.630878
HSPE1	0.233955	0.0498191	0.729	0.642	1	HSPE1	0.630867
SWI5	0.234192	-0.0592982	0.083	0.123	1	SWI5	0.630429
UBE3C	0.234783	0.104154	0.173	0.134	1	UBE3C	0.629334
FOXK2	0.234877	-0.0714852	0.09	0.134	1	FOXK2	0.62916
MRPS31	0.235005	-0.1132	0.241	0.294	1	MRPS31	0.628923
FERMT3	0.235309	0.113486	0.511	0.492	1	FERMT3	0.628361
SEC24C	0.23536	0.064935	0.113	0.075	1	SEC24C	0.628268
BANF1	0.235364	-0.053828	0.331	0.406	1	BANF1	0.62826
CCDC69	0.235642	0.0821195	0.421	0.358	1	CCDC69	0.627747
ADAM17	0.235708	0.108971	0.12	0.086	1	ADAM17	0.627625
DDX41	0.236058	-0.0803933	0.075	0.112	1	DDX41	0.626981
BECN1	0.236284	0.0588743	0.286	0.225	1	BECN1	0.626565
IFNAR2	0.236285	0.117043	0.451	0.412	1	IFNAR2	0.626564
ZBTB8OS	0.236384	0.071103	0.391	0.332	1	ZBTB8OS	0.626382
SUPT16H	0.236993	-0.062795	0.436	0.481	1	SUPT16H	0.625265
DYNC1LI1	0.237194	0.105961	0.301	0.257	1	DYNC1LI1	0.624896
TPM4	0.237388	0.110555	0.654	0.663	1	TPM4	0.624542
NUP205	0.237574	-0.0517412	0.075	0.118	1	NUP205	0.624201
GRINA	0.237817	-0.0674869	0.083	0.123	1	GRINA	0.623758
SLC35E2A	0.237953	0.043299	0.12	0.08	1	SLC35E2A	0.623509
MEX3C	0.238009	-0.0944073	0.173	0.23	1	MEX3C	0.623407
LSM4	0.238374	0.137006	0.406	0.321	1	LSM4	0.622742
ZNF444	0.238972	0.0669861	0.105	0.07	1	ZNF444	0.621652
MRPL54	0.239353	0.0939057	0.579	0.519	1	MRPL54	0.620962
NEDD8	0.239359	-0.0800904	0.752	0.775	1	NEDD8	0.620951
MAPKAP1	0.239725	0.0887508	0.203	0.155	1	MAPKAP1	0.620286
JUND	0.239833	0.0646987	0.947	0.904	1	JUND	0.620091
CAMTA2	0.239858	0.0444509	0.12	0.08	1	CAMTA2	0.620045
INSIG2	0.239934	-0.018088	0.09	0.139	1	INSIG2	0.619908
SRP72	0.239971	-0.0136063	0.316	0.396	1	SRP72	0.619842
MDM4	0.240181	-0.0773328	0.398	0.439	1	MDM4	0.619461
DIS3L2	0.240239	-0.0772881	0.09	0.128	1	DIS3L2	0.619356
OAZ2	0.240411	-0.0884971	0.128	0.171	1	OAZ2	0.619045
PIK3R5	0.240499	-0.0733697	0.098	0.139	1	PIK3R5	0.618887
TMEM203	0.2407	-0.0825244	0.203	0.262	1	TMEM203	0.618524
HNRNPD	0.24076	-0.0856587	0.639	0.733	1	HNRNPD	0.618416
GPI	0.240903	0.0554818	0.263	0.203	1	GPI	0.618158
CERS5	0.241131	-0.0904702	0.158	0.209	1	CERS5	0.617747
TMEM14C	0.241171	-0.0652979	0.331	0.39	1	TMEM14C	0.617675
AZIN1	0.241221	-0.0460092	0.15	0.209	1	AZIN1	0.617586
USP36	0.24124	0.0568064	0.113	0.075	1	USP36	0.617551
POLR2M	0.24124	0.0554871	0.113	0.075	1	POLR2M	0.617551
CNOT4	0.241348	-0.0681325	0.256	0.31	1	CNOT4	0.617357
RNF19A	0.24155	-0.0692074	0.376	0.455	1	RNF19A	0.616993
RBM7	0.241694	-0.0913822	0.233	0.283	1	RBM7	0.616734
CALR	0.241816	-0.104411	0.752	0.824	1	CALR	0.616516
PARP10	0.24184	0.0533456	0.165	0.118	1	PARP10	0.616471
SZT2	0.241852	-0.0560061	0.113	0.16	1	SZT2	0.616451
NTHL1	0.24218	0.0983148	0.248	0.198	1	NTHL1	0.615862
ATP2C1	0.242193	0.0333926	0.173	0.123	1	ATP2C1	0.615838
QRICH1	0.24223	-0.0441025	0.068	0.107	1	QRICH1	0.615773
HEXA	0.242325	-0.0875153	0.263	0.326	1	HEXA	0.615602
INO80D	0.242347	-0.0649012	0.203	0.257	1	INO80D	0.615563
PLRG1	0.24249	0.0662078	0.241	0.187	1	PLRG1	0.615306
DDT	0.242646	-0.0813358	0.526	0.599	1	DDT	0.615026
PIM1	0.242698	-0.0562873	0.714	0.807	1	PIM1	0.614934
MICU2	0.242956	0.0871568	0.323	0.273	1	MICU2	0.614473
KLHL7	0.243055	0.0685466	0.105	0.07	1	KLHL7	0.614296
DDX55	0.243055	0.0676503	0.105	0.07	1	DDX55	0.614296
ORMDL3	0.243205	0.0677599	0.248	0.198	1	ORMDL3	0.614028
DEXI	0.243221	0.0721959	0.233	0.187	1	DEXI	0.613999
ANKH	0.243293	-0.0697469	0.248	0.31	1	ANKH	0.61387
MAP1S	0.243328	-0.0654179	0.083	0.123	1	MAP1S	0.613808
HABP4	0.243571	0.0644983	0.233	0.182	1	HABP4	0.613374
PTMA	0.243643	0.0567993	1	1	1	PTMA	0.613246
AC133644.2	0.243935	0.0966429	0.624	0.572	1	AC133644.2	0.612727
LYPLAL1	0.243986	0.0572003	0.188	0.139	1	LYPLAL1	0.612635
ZNF586	0.244083	0.0664746	0.105	0.07	1	ZNF586	0.612463
MRPL51	0.244171	0.066665	0.722	0.62	1	MRPL51	0.612307
CHTOP	0.244322	0.0932548	0.293	0.246	1	CHTOP	0.612038
SQSTM1	0.244376	0.112812	0.602	0.567	1	SQSTM1	0.611942
NSF	0.244522	0.08142	0.226	0.176	1	NSF	0.611682
TMEM65	0.244764	-0.0919489	0.158	0.209	1	TMEM65	0.611253
OGDH	0.24497	-0.119954	0.211	0.262	1	OGDH	0.610888
NAPRT	0.245151	0.0434571	0.165	0.118	1	NAPRT	0.610566
SLU7	0.245527	0.0812526	0.368	0.321	1	SLU7	0.609902
SLC35B3	0.245639	-0.0625996	0.075	0.112	1	SLC35B3	0.609703
MYL6B	0.245689	-0.127929	0.211	0.251	1	MYL6B	0.609615
C19orf25	0.245693	0.0539625	0.436	0.353	1	C19orf25	0.609607
DPM1	0.245698	0.0645105	0.203	0.155	1	DPM1	0.609599
CIZ1	0.245763	-0.0845282	0.068	0.102	1	CIZ1	0.609483
COMMD3	0.245767	0.0160465	0.368	0.465	1	COMMD3	0.609476
MEMO1	0.246117	-0.0665624	0.083	0.123	1	MEMO1	0.608858
PHF3	0.246259	-0.064939	0.474	0.529	1	PHF3	0.608607
PPP4R3A	0.24659	-0.0720417	0.368	0.417	1	PPP4R3A	0.608025
RHOG	0.246633	0.0873264	0.684	0.594	1	RHOG	0.607949
HIST1H1E	0.246676	-0.0675607	0.165	0.219	1	HIST1H1E	0.607873
MRPS6	0.246848	0.121442	0.752	0.695	1	MRPS6	0.60757
FXN	0.247505	-0.0809172	0.105	0.15	1	FXN	0.606416
ANAPC1	0.248226	0.0566815	0.105	0.07	1	ANAPC1	0.605153
NHLRC2	0.248309	-0.0914866	0.083	0.118	1	NHLRC2	0.605008
RDH13	0.248565	-0.0865969	0.075	0.112	1	RDH13	0.604559
ERI3	0.248637	-0.0636288	0.09	0.134	1	ERI3	0.604435
KARS	0.248695	-0.119725	0.233	0.278	1	KARS	0.604333
UTP23	0.24874	0.0648318	0.18	0.134	1	UTP23	0.604255
HERC4	0.249085	-0.165922	0.316	0.358	1	HERC4	0.603652
ETNK1	0.249494	-0.0940985	0.248	0.289	1	ETNK1	0.602939
PCYOX1	0.249546	-0.0640712	0.075	0.112	1	PCYOX1	0.602849
POLR3GL	0.24976	0.0693476	0.436	0.38	1	POLR3GL	0.602476
SMIM27	0.249763	-0.102463	0.09	0.128	1	SMIM27	0.602471
CD52	0.250148	-0.0851275	0.992	1	1	CD52	0.601803
SEC61B	0.250394	0.0734097	0.827	0.845	1	SEC61B	0.601377
BCDIN3D	0.251268	0.0430782	0.113	0.075	1	BCDIN3D	0.599862
AL662844.4	0.251268	-0.0372269	0.068	0.107	1	AL662844.4	0.599862
TARS	0.251563	-0.0900985	0.165	0.209	1	TARS	0.599353
BCKDK	0.251762	0.0761603	0.128	0.091	1	BCKDK	0.599009
SETD1B	0.251868	0.0562719	0.165	0.118	1	SETD1B	0.598827
RIC8A	0.251944	0.0898744	0.18	0.139	1	RIC8A	0.598696
RTF2	0.252052	0.115918	0.459	0.39	1	RTF2	0.598509
MDH1	0.252136	0.0965931	0.579	0.529	1	MDH1	0.598365
CAMTA1	0.252242	-0.0623373	0.211	0.267	1	CAMTA1	0.598182
ZNF302	0.252632	-0.0488656	0.226	0.283	1	ZNF302	0.597511
MRPS11	0.252738	0.0895035	0.331	0.273	1	MRPS11	0.59733
IPO5	0.252776	0.0747273	0.18	0.134	1	IPO5	0.597264
DNASE1	0.253047	-0.0900326	0.12	0.166	1	DNASE1	0.596799
SPEN	0.253074	0.117124	0.421	0.369	1	SPEN	0.596752
SMARCD2	0.253155	0.0575904	0.271	0.209	1	SMARCD2	0.596614
ITPKB	0.253241	-0.0761836	0.173	0.219	1	ITPKB	0.596467
FDPS	0.253424	-0.098106	0.406	0.449	1	FDPS	0.596152
KMT5A	0.253589	0.0813694	0.18	0.134	1	KMT5A	0.59587
MGRN1	0.253713	-0.0788237	0.098	0.139	1	MGRN1	0.595657
CCDC43	0.253875	0.0468054	0.173	0.128	1	CCDC43	0.595381
PAG1	0.254516	-0.0877486	0.496	0.529	1	PAG1	0.594284
DCAF16	0.254532	0.0690954	0.105	0.07	1	DCAF16	0.594257
CACYBP	0.254765	0.129743	0.571	0.54	1	CACYBP	0.593861
RFX7	0.254857	-0.0796408	0.09	0.128	1	RFX7	0.593704
BUD13	0.255034	0.043319	0.128	0.086	1	BUD13	0.593401
SIK3	0.255234	0.0575333	0.203	0.15	1	SIK3	0.593061
AKAP11	0.255291	0.10406	0.188	0.144	1	AKAP11	0.592965
NAA16	0.255316	-0.0465905	0.105	0.155	1	NAA16	0.592922
UFSP2	0.25536	-0.0362161	0.068	0.107	1	UFSP2	0.592847
SNRK	0.255629	-0.0731278	0.211	0.267	1	SNRK	0.59239
ARFRP1	0.255943	-0.0866053	0.18	0.23	1	ARFRP1	0.591857
TMEM109	0.256268	-0.0459908	0.128	0.182	1	TMEM109	0.591306
ARHGAP27	0.256418	-0.0486038	0.09	0.134	1	ARHGAP27	0.591052
TAF1D	0.256646	0.104677	0.534	0.497	1	TAF1D	0.590666
FASTK	0.256729	0.142671	0.203	0.16	1	FASTK	0.590525
SELENOS	0.256744	-0.0764799	0.316	0.38	1	SELENOS	0.5905
TTC5	0.256811	-0.0973325	0.195	0.235	1	TTC5	0.590386
ATE1	0.256889	0.0893392	0.188	0.144	1	ATE1	0.590254
TROVE2	0.257077	0.136385	0.338	0.289	1	TROVE2	0.589937
KLHL42	0.257423	0.0646818	0.113	0.075	1	KLHL42	0.589352
DLG1	0.257479	0.0670928	0.188	0.139	1	DLG1	0.589259
CYTH4	0.257567	-0.0797437	0.241	0.299	1	CYTH4	0.58911
RILPL2	0.257584	-0.0390405	0.466	0.561	1	RILPL2	0.589081
ARPC4	0.257711	0.0795149	0.684	0.61	1	ARPC4	0.588867
DAP	0.257955	0.0322721	0.128	0.086	1	DAP	0.588456
NIT2	0.258043	-0.0580641	0.195	0.251	1	NIT2	0.588307
UROD	0.258228	-0.056993	0.098	0.139	1	UROD	0.587996
HAPLN3	0.258453	0.11666	0.481	0.433	1	HAPLN3	0.587618
KRAS	0.25885	-0.0998431	0.271	0.321	1	KRAS	0.586952
WDR33	0.258972	-0.0720452	0.368	0.428	1	WDR33	0.586748
FAM104A	0.259188	0.0984997	0.361	0.31	1	FAM104A	0.586386
NUP37	0.260511	-0.0485309	0.135	0.182	1	NUP37	0.584175
BICD2	0.260515	-0.0609287	0.075	0.112	1	BICD2	0.584167
FBL	0.260867	-0.10093	0.278	0.332	1	FBL	0.583581
SCYL2	0.26095	0.0460118	0.105	0.07	1	SCYL2	0.583443
TES	0.261315	0.0912324	0.429	0.374	1	TES	0.582835
PEBP1	0.261721	0.0931016	0.714	0.711	1	PEBP1	0.582162
WAC	0.26179	-0.0311986	0.444	0.497	1	WAC	0.582047
TRIR	0.261843	0.0485163	0.887	0.882	1	TRIR	0.58196
ANAPC4	0.261994	-0.0505262	0.113	0.16	1	ANAPC4	0.581708
CREB3	0.262345	0.0809862	0.128	0.091	1	CREB3	0.581127
EXOC7	0.262348	-0.051676	0.226	0.289	1	EXOC7	0.581122
GTF2F1	0.262543	0.0931093	0.248	0.198	1	GTF2F1	0.580799
APH1A	0.26263	-0.0465733	0.256	0.326	1	APH1A	0.580656
FLI1	0.262829	0.110581	0.218	0.171	1	FLI1	0.580327
TSC22D4	0.262893	-0.0859451	0.338	0.396	1	TSC22D4	0.580221
RPL30	0.263256	-0.0457144	1	1	1	RPL30	0.579621
PLEKHA3	0.263415	-0.0227061	0.263	0.342	1	PLEKHA3	0.579359
NUDT5	0.26343	0.0698285	0.459	0.412	1	NUDT5	0.579335
PPP4R3B	0.263496	0.13673	0.391	0.358	1	PPP4R3B	0.579226
EIF3B	0.263975	0.112823	0.383	0.326	1	EIF3B	0.578437
PAPSS1	0.264132	-0.0659554	0.18	0.235	1	PAPSS1	0.578179
MAGEF1	0.264302	-0.0610303	0.083	0.123	1	MAGEF1	0.5779
CENPK	0.264354	-0.0420974	0.15	0.203	1	CENPK	0.577815
ICOS	0.264387	0.0768392	0.323	0.267	1	ICOS	0.577761
ANKRD36B	0.264791	0.0703056	0.143	0.102	1	ANKRD36B	0.577097
QKI	0.264931	0.0668968	0.278	0.219	1	QKI	0.576867
DDA1	0.26529	-0.0464472	0.218	0.278	1	DDA1	0.576279
GMFG	0.265348	0.0519201	0.962	0.973	1	GMFG	0.576185
LRIF1	0.266272	-0.0448967	0.128	0.176	1	LRIF1	0.574674
AC025164.1	0.266624	0.147374	0.188	0.144	1	AC025164.1	0.5741
PSMD7	0.266961	0.0627768	0.564	0.519	1	PSMD7	0.573553
ARPP19	0.267231	-0.0589055	0.383	0.433	1	ARPP19	0.573113
GPR68	0.267256	-0.0478932	0.083	0.123	1	GPR68	0.573073
WAS	0.267305	0.114498	0.519	0.46	1	WAS	0.572993
ANXA6	0.267497	0.0801415	0.564	0.481	1	ANXA6	0.572681
PHACTR2	0.267549	0.140214	0.624	0.572	1	PHACTR2	0.572597
TERF2IP	0.26767	0.0743942	0.759	0.69	1	TERF2IP	0.572401
FAM122B	0.267834	0.0717937	0.12	0.086	1	FAM122B	0.572135
STK11	0.26804	-0.0663561	0.18	0.23	1	STK11	0.571801
RAE1	0.268072	-0.0256225	0.098	0.144	1	RAE1	0.571749
TC2N	0.268124	0.125442	0.293	0.241	1	TC2N	0.571664
CD3E	0.268201	-0.0617923	0.94	0.936	1	CD3E	0.57154
GPALPP1	0.268235	0.0805466	0.173	0.128	1	GPALPP1	0.571485
CUL9	0.268467	0.132604	0.286	0.246	1	CUL9	0.571109
TIMMDC1	0.268495	0.100201	0.226	0.182	1	TIMMDC1	0.571064
PCBP2	0.268517	-0.0953407	0.639	0.674	1	PCBP2	0.571028
DPYD	0.268557	0.0751454	0.263	0.214	1	DPYD	0.570963
PRPS1	0.268601	0.0571992	0.226	0.171	1	PRPS1	0.570892
HIF1A	0.268661	0.0813183	0.241	0.198	1	HIF1A	0.570795
CLSTN1	0.268923	0.0905173	0.308	0.262	1	CLSTN1	0.570373
RAMMET	0.26893	0.0705863	0.376	0.332	1	RAMMET	0.57036
MRPL3	0.269121	-0.0676464	0.278	0.342	1	MRPL3	0.570053
DYNLRB1	0.269306	0.0332059	0.82	0.759	1	DYNLRB1	0.569754
DESI2	0.269389	-0.0839389	0.135	0.176	1	DESI2	0.56962
MYO1F	0.269426	0.0312846	0.654	0.561	1	MYO1F	0.56956
LST1	0.269487	0.135779	0.383	0.321	1	LST1	0.569462
ELF1	0.269497	0.0936837	0.526	0.481	1	ELF1	0.569446
NEAT1	0.269583	-0.11029	0.985	0.968	1	NEAT1	0.569308
SGTB	0.270107	0.080611	0.233	0.187	1	SGTB	0.568464
PHF20L1	0.270214	-0.0865909	0.248	0.316	1	PHF20L1	0.568293
FOXP3	0.270407	0.0396241	0.669	0.642	1	FOXP3	0.567982
GTF2F2	0.270867	-0.0562284	0.15	0.198	1	GTF2F2	0.567245
SAMSN1	0.270979	-0.0935837	0.511	0.578	1	SAMSN1	0.567064
NUBP2	0.271474	-0.0760077	0.218	0.273	1	NUBP2	0.566271
ZFPM1	0.27148	0.0417222	0.188	0.139	1	ZFPM1	0.566262
RMND5B	0.271975	0.0860314	0.211	0.166	1	RMND5B	0.56547
WDR61	0.272029	0.066191	0.195	0.15	1	WDR61	0.565384
STX2	0.272229	-0.046455	0.083	0.123	1	STX2	0.565066
SYNGR2	0.272351	0.0604183	0.263	0.203	1	SYNGR2	0.564871
ATP6V1G1	0.272476	-0.0684818	0.887	0.893	1	ATP6V1G1	0.564671
IFT57	0.272489	0.059285	0.165	0.123	1	IFT57	0.564652
ZNF33A	0.272722	-0.139696	0.241	0.294	1	ZNF33A	0.56428
PSMD11	0.272793	0.0975819	0.474	0.412	1	PSMD11	0.564168
CIR1	0.273206	-0.105165	0.429	0.465	1	CIR1	0.56351
TLNRD1	0.273511	-0.0825868	0.18	0.225	1	TLNRD1	0.563025
GOLGB1	0.273783	-0.0555333	0.451	0.535	1	GOLGB1	0.562594
RASSF3	0.273812	0.10638	0.308	0.257	1	RASSF3	0.562548
DDX51	0.273903	-0.0449945	0.075	0.112	1	DDX51	0.562403
SNRPG	0.274094	-0.0702117	0.617	0.647	1	SNRPG	0.562101
ZNRF2	0.274263	0.0879962	0.368	0.316	1	ZNRF2	0.561833
ABI1	0.274265	-0.0632995	0.316	0.374	1	ABI1	0.56183
ESRRA	0.274265	-0.0471633	0.113	0.16	1	ESRRA	0.561829
CLPTM1L	0.274734	-0.108883	0.263	0.316	1	CLPTM1L	0.561088
STX4	0.274799	0.0794974	0.331	0.289	1	STX4	0.560985
SERBP1	0.274897	0.0777099	0.902	0.84	1	SERBP1	0.56083
TMEM161A	0.274964	-0.0515244	0.09	0.128	1	TMEM161A	0.560724
TMEM8A	0.275082	-0.0891875	0.15	0.193	1	TMEM8A	0.560537
FYTTD1	0.275175	-0.0879853	0.248	0.299	1	FYTTD1	0.560391
PPM1A	0.275211	-0.0633505	0.158	0.209	1	PPM1A	0.560334
YLPM1	0.275324	0.0684965	0.195	0.15	1	YLPM1	0.560156
TMEM173	0.275341	0.0799525	0.692	0.636	1	TMEM173	0.56013
AC139887.2	0.275423	-0.0579915	0.068	0.102	1	AC139887.2	0.56
PPP1R9B	0.275423	-0.0765563	0.068	0.102	1	PPP1R9B	0.56
TRIM56	0.275882	0.0811434	0.391	0.326	1	TRIM56	0.559277
PI4KB	0.275948	-0.0708689	0.09	0.128	1	PI4KB	0.559173
TRIAP1	0.276012	-0.0826823	0.165	0.209	1	TRIAP1	0.559073
PLIN2	0.27613	-0.107575	0.338	0.39	1	PLIN2	0.558887
PPA1	0.276424	0.109075	0.602	0.556	1	PPA1	0.558425
CD58	0.276453	0.06021	0.346	0.278	1	CD58	0.558378
LRRC8C	0.27661	0.0692996	0.188	0.144	1	LRRC8C	0.558131
EXOC4	0.27675	0.0910906	0.211	0.166	1	EXOC4	0.557912
EBNA1BP2	0.276799	-0.0489718	0.158	0.209	1	EBNA1BP2	0.557836
MED17	0.276937	-0.0683469	0.12	0.166	1	MED17	0.557618
SCFD1	0.277072	0.0760081	0.361	0.305	1	SCFD1	0.557407
TIGIT	0.277242	0.0999707	0.902	0.866	1	TIGIT	0.557141
ZNF143	0.277454	0.0670336	0.188	0.144	1	ZNF143	0.556809
SEM1	0.277526	0.0605542	0.662	0.636	1	SEM1	0.556697
LINC00623	0.277595	0.0596883	0.218	0.166	1	LINC00623	0.556589
RPL8	0.277645	-0.0418874	1	1	1	RPL8	0.556511
SYTL3	0.2777	-0.0195391	0.12	0.171	1	SYTL3	0.556423
LUC7L	0.27782	-0.0708768	0.135	0.176	1	LUC7L	0.556236
TUBA1C	0.277827	0.0668373	0.293	0.241	1	TUBA1C	0.556225
PCNP	0.277876	0.0851113	0.474	0.406	1	PCNP	0.556149
ITGAM	0.277923	-0.0680675	0.09	0.128	1	ITGAM	0.556076
CFAP298	0.278232	0.0859794	0.301	0.251	1	CFAP298	0.555592
NCOA2	0.278292	0.051485	0.165	0.123	1	NCOA2	0.5555
ELMSAN1	0.278561	0.0736919	0.18	0.139	1	ELMSAN1	0.555079
KIAA1143	0.278575	0.0887367	0.173	0.134	1	KIAA1143	0.555058
ESCO1	0.278636	0.0541367	0.323	0.262	1	ESCO1	0.554963
RNF11	0.278914	-0.0603801	0.09	0.128	1	RNF11	0.55453
PI4KA	0.279073	0.0569553	0.143	0.102	1	PI4KA	0.554283
KHNYN	0.279175	-0.048771	0.075	0.112	1	KHNYN	0.554123
CYSLTR1	0.279253	-0.0388724	0.128	0.171	1	CYSLTR1	0.554003
TOR1AIP2	0.279515	-0.0745609	0.165	0.214	1	TOR1AIP2	0.553595
ATF7IP2	0.279528	-0.129015	0.135	0.176	1	ATF7IP2	0.553575
PCBP1	0.279616	-0.0984231	0.782	0.802	1	PCBP1	0.553438
ZDHHC13	0.280043	0.0483989	0.143	0.102	1	ZDHHC13	0.552775
TMEM41A	0.28023	0.0677585	0.12	0.086	1	TMEM41A	0.552486
CCNY	0.280473	-0.0791215	0.211	0.262	1	CCNY	0.552109
SEC22C	0.280523	-0.0447969	0.18	0.23	1	SEC22C	0.552031
HNRNPUL2	0.280903	0.0422142	0.135	0.096	1	HNRNPUL2	0.551443
GABPB2	0.280966	-0.0611805	0.068	0.102	1	GABPB2	0.551346
HDAC2	0.281016	-0.0741734	0.098	0.134	1	HDAC2	0.551269
TMEM154	0.281096	-0.0523285	0.256	0.316	1	TMEM154	0.551146
NCBP2	0.281127	0.0786388	0.368	0.305	1	NCBP2	0.551098
MTR	0.28136	-0.0621831	0.12	0.166	1	MTR	0.550737
[truncated: 3,657 more rows]

## Sheet: S2D-C4 Bispecific vs. PD-1
Table S2D: Differential Expression Analysis CD4 Tregs cluster 4 Bispecific vs. PD-1
	p_val	avg_logFC	pct.1	pct.2	p_val_adj	Gene_ID	logP
NANS	0.000148809	0.264959	0.383	0.174	1	NANS	3.82737
ZNF397	0.000168773	-0.195552	0.06	0.225	1	ZNF397	3.7727
SNUPN	0.000357625	0.221818	0.226	0.072	1	SNUPN	3.44657
PELI1	0.00044906	0.235206	0.211	0.065	1	PELI1	3.3477
RPUSD3	0.000517228	-0.308047	0.113	0.275	1	RPUSD3	3.28632
ARL6IP6	0.000670606	0.214454	0.271	0.109	1	ARL6IP6	3.17353
CAPG	0.000727924	0.25372	0.331	0.152	1	CAPG	3.13791
NFS1	0.000924765	-0.153575	0.023	0.13	1	NFS1	3.03397
UBE2W	0.00115526	-0.227536	0.105	0.254	1	UBE2W	2.93732
BCOR	0.00120991	-0.193507	0.03	0.138	1	BCOR	2.91725
WBP1L	0.00136163	0.163257	0.15	0.036	1	WBP1L	2.86594
PRPF8	0.00169522	-0.287549	0.278	0.442	1	PRPF8	2.77077
JUND	0.00209954	0.226975	0.947	0.862	1	JUND	2.67788
BRCC3	0.00221866	0.186917	0.173	0.058	1	BRCC3	2.65391
MTIF2	0.00229041	-0.187684	0.075	0.203	1	MTIF2	2.64009
TUBD1	0.0024006	-0.181948	0.053	0.167	1	TUBD1	2.61968
ATG4C	0.00246193	-0.156939	0.023	0.116	1	ATG4C	2.60872
GTF2A1	0.00253677	-0.193095	0.075	0.203	1	GTF2A1	2.59572
PICALM	0.0026627	0.263312	0.338	0.188	1	PICALM	2.57468
NDUFA9	0.00268161	-0.315338	0.218	0.37	1	NDUFA9	2.5716
KAT6A	0.00278192	-0.238004	0.301	0.478	1	KAT6A	2.55566
EIF2B3	0.0029795	-0.104621	0.015	0.101	1	EIF2B3	2.52586
SELENOT	0.0030756	0.220949	0.639	0.449	1	SELENOT	2.51207
NDUFS8	0.00333827	-0.24051	0.496	0.623	1	NDUFS8	2.47648
METTL16	0.00341634	-0.188646	0.075	0.196	1	METTL16	2.46644
TMEM181	0.0034568	0.168494	0.203	0.08	1	TMEM181	2.46133
TMSB10	0.0035335	0.139582	1	1	1	TMSB10	2.4518
ZNF280D	0.00364824	-0.207799	0.113	0.254	1	ZNF280D	2.43792
OSTM1	0.00380161	-0.242775	0.158	0.29	1	OSTM1	2.42003
SDF4	0.00418841	0.237559	0.383	0.232	1	SDF4	2.37795
SLC41A1	0.0042178	0.153702	0.143	0.043	1	SLC41A1	2.37491
UBE2I	0.00440754	0.176322	0.744	0.623	1	UBE2I	2.3558
CCND2	0.00450074	0.290241	0.662	0.551	1	CCND2	2.34672
TSR1	0.00452185	-0.125536	0.03	0.123	1	TSR1	2.34468
SLC2A1	0.00456458	-0.207561	0.06	0.167	1	SLC2A1	2.3406
PHKB	0.00489004	-0.224838	0.248	0.391	1	PHKB	2.31069
GRB2	0.00491434	0.156836	0.609	0.442	1	GRB2	2.30853
ENDOV	0.00492373	0.157557	0.143	0.043	1	ENDOV	2.30771
ADRM1	0.0049309	-0.272936	0.361	0.493	1	ADRM1	2.30707
GTF2H2C	0.00500094	-0.128872	0.023	0.109	1	GTF2H2C	2.30095
HLA-A	0.00519675	0.110901	1	0.993	1	HLA-A	2.28427
TSPYL2	0.00522782	-0.146663	0.053	0.159	1	TSPYL2	2.28168
XPC	0.00556809	-0.190174	0.241	0.391	1	XPC	2.25429
EVI2B	0.00560704	-0.240365	0.474	0.572	1	EVI2B	2.25127
TCAF2	0.00565785	0.173157	0.18	0.072	1	TCAF2	2.24735
EXOC3	0.00571138	0.201737	0.195	0.08	1	EXOC3	2.24326
PSMB9	0.00576478	0.207175	0.902	0.848	1	PSMB9	2.23922
MAGT1	0.00595889	-0.15101	0.105	0.232	1	MAGT1	2.22483
ZNF48	0.00605418	-0.151765	0.03	0.116	1	ZNF48	2.21794
UQCRQ	0.00617907	0.209933	0.549	0.413	1	UQCRQ	2.20908
SEC11C	0.00627389	0.227238	0.669	0.507	1	SEC11C	2.20246
PHYKPL	0.00642416	-0.199777	0.241	0.384	1	PHYKPL	2.19218
ASXL2	0.00659853	-0.2322	0.15	0.283	1	ASXL2	2.18055
B2M	0.00661743	0.0893827	1	1	1	B2M	2.17931
PRDX1	0.00661844	0.174747	0.947	0.891	1	PRDX1	2.17924
VDAC2	0.00675207	0.214296	0.677	0.529	1	VDAC2	2.17056
SUMO2	0.00677297	0.128886	0.985	0.949	1	SUMO2	2.16922
SUSD6	0.0069191	-0.194137	0.105	0.217	1	SUSD6	2.15995
SDHAF1	0.00700319	-0.151027	0.105	0.232	1	SDHAF1	2.1547
GBP5	0.00702088	0.242414	0.662	0.565	1	GBP5	2.15361
ANAPC5	0.00710992	-0.237428	0.406	0.558	1	ANAPC5	2.14814
MALSU1	0.00719033	0.131001	0.331	0.181	1	MALSU1	2.14325
STT3B	0.00727084	-0.208259	0.248	0.406	1	STT3B	2.13842
FBXO6	0.0073217	0.138501	0.15	0.051	1	FBXO6	2.13539
ALDOC	0.00759455	-0.118402	0.03	0.116	1	ALDOC	2.1195
TSPOAP1-AS1	0.00769061	-0.158662	0.068	0.174	1	TSPOAP1-AS1	2.11404
UQCR11	0.00769523	0.190852	0.812	0.667	1	UQCR11	2.11378
PTPN2	0.00789689	0.106462	0.436	0.268	1	PTPN2	2.10254
SLC26A4-AS1	0.00805626	0.123139	0.113	0.029	1	SLC26A4-AS1	2.09387
COPS8	0.00815685	0.184044	0.241	0.123	1	COPS8	2.08848
COX6B1	0.00816833	0.173303	0.91	0.804	1	COX6B1	2.08787
VAPA	0.00857875	0.148787	0.669	0.493	1	VAPA	2.06658
CASC4	0.00865961	-0.228539	0.15	0.275	1	CASC4	2.0625
LCORL	0.00871896	-0.151622	0.06	0.159	1	LCORL	2.05954
DGCR2	0.00873466	0.133267	0.135	0.043	1	DGCR2	2.05875
IKZF3	0.00893806	-0.208982	0.406	0.536	1	IKZF3	2.04876
SMIM7	0.00900134	-0.175227	0.301	0.464	1	SMIM7	2.04569
GATAD1	0.00936824	-0.15678	0.135	0.268	1	GATAD1	2.02834
TMEM87B	0.00949759	-0.155068	0.068	0.167	1	TMEM87B	2.02239
HMG20B	0.00960754	0.154173	0.256	0.123	1	HMG20B	2.01739
RSAD1	0.00965152	-0.167294	0.068	0.167	1	RSAD1	2.0154
NVL	0.00984243	0.172354	0.15	0.058	1	NVL	2.0069
CHMP2A	0.00990358	0.163773	0.759	0.63	1	CHMP2A	2.00421
MAPK1	0.00998439	-0.218435	0.158	0.283	1	MAPK1	2.00068
HLA-F	0.0104425	0.204868	0.962	0.848	1	HLA-F	1.9812
TKT	0.0104996	-0.221036	0.451	0.58	1	TKT	1.97883
CHMP5	0.0106549	0.194115	0.489	0.341	1	CHMP5	1.97245
GNL3L	0.0110197	0.161714	0.128	0.043	1	GNL3L	1.95783
RAD1	0.0111428	-0.135509	0.075	0.181	1	RAD1	1.95301
S1PR1	0.011632	-0.17575	0.143	0.268	1	S1PR1	1.93435
DPYD	0.0118701	0.15966	0.263	0.138	1	DPYD	1.92555
NUP214	0.0118752	-0.155522	0.083	0.188	1	NUP214	1.92536
TIMM10B	0.0119223	0.165203	0.233	0.116	1	TIMM10B	1.92364
TMEM258	0.0120057	0.199478	0.692	0.529	1	TMEM258	1.92061
RABEP2	0.0120432	0.162905	0.15	0.058	1	RABEP2	1.91926
CD320	0.0126223	-0.193091	0.361	0.493	1	CD320	1.89886
DCTN3	0.012693	0.181488	0.564	0.435	1	DCTN3	1.89644
NDUFB7	0.0130509	0.14518	0.707	0.616	1	NDUFB7	1.88436
FTSJ1	0.013536	0.111826	0.105	0.029	1	FTSJ1	1.86851
ZDHHC3	0.0136516	0.20696	0.195	0.094	1	ZDHHC3	1.86482
USP8	0.0138851	-0.271265	0.353	0.493	1	USP8	1.85745
CTSH	0.0139521	0.228323	0.256	0.138	1	CTSH	1.85536
VDAC1	0.0140657	0.198849	0.534	0.42	1	VDAC1	1.85184
NUCB1	0.0141166	-0.176664	0.331	0.5	1	NUCB1	1.85027
TLR1	0.0141962	0.129861	0.128	0.043	1	TLR1	1.84783
HACD4	0.0142897	0.197484	0.323	0.188	1	HACD4	1.84498
SETDB2	0.0147746	-0.164248	0.083	0.181	1	SETDB2	1.83048
REXO1	0.0148587	-0.135868	0.06	0.152	1	REXO1	1.82802
VRK3	0.014987	-0.157267	0.105	0.217	1	VRK3	1.82429
LINC00476	0.0150624	-0.157953	0.068	0.159	1	LINC00476	1.82211
TRMT13	0.0153134	-0.176384	0.158	0.283	1	TRMT13	1.81493
RCOR3	0.0156084	0.152731	0.158	0.065	1	RCOR3	1.80664
IFI27L2	0.0156141	0.169137	0.556	0.406	1	IFI27L2	1.80648
MPHOSPH6	0.0156935	0.137053	0.263	0.138	1	MPHOSPH6	1.80428
MLYCD	0.0158194	0.152508	0.113	0.036	1	MLYCD	1.80081
CSNK1A1	0.0160272	-0.167459	0.564	0.659	1	CSNK1A1	1.79514
ITPA	0.0162925	-0.221279	0.195	0.312	1	ITPA	1.78801
CHP1	0.0163477	-0.139556	0.083	0.181	1	CHP1	1.78654
ELP4	0.016667	0.16735	0.143	0.058	1	ELP4	1.77814
ARHGEF9	0.0167361	-0.132317	0.053	0.138	1	ARHGEF9	1.77635
COPB1	0.0170811	0.205167	0.436	0.312	1	COPB1	1.76749
NOP10	0.0172529	0.141117	0.759	0.667	1	NOP10	1.76314
BFSP2	0.0173337	-0.122664	0.03	0.101	1	BFSP2	1.76111
CYB5D2	0.0174976	-0.113174	0.038	0.116	1	CYB5D2	1.75702
ZC3H10	0.0175034	-0.117138	0.03	0.101	1	ZC3H10	1.75688
WDR18	0.0175303	-0.215892	0.128	0.239	1	WDR18	1.75621
RIC8B	0.0177073	0.130566	0.12	0.043	1	RIC8B	1.75185
ZFP36L1	0.0178033	-0.209101	0.526	0.638	1	ZFP36L1	1.7495
SLC52A2	0.0178049	0.155071	0.278	0.159	1	SLC52A2	1.74946
BIN1	0.0178646	0.180914	0.579	0.442	1	BIN1	1.74801
PLEKHN1	0.0179439	0.143609	0.12	0.043	1	PLEKHN1	1.74608
WDR70	0.0181421	-0.0885319	0.038	0.116	1	WDR70	1.74131
OLA1	0.0181718	-0.183385	0.308	0.442	1	OLA1	1.7406
HCFC1	0.0182337	-0.177657	0.098	0.196	1	HCFC1	1.73913
ERV3-1	0.0183736	-0.158158	0.03	0.101	1	ERV3-1	1.7358
NPEPL1	0.0185071	0.12241	0.12	0.043	1	NPEPL1	1.73266
BCAP29	0.0186712	-0.145888	0.226	0.348	1	BCAP29	1.72883
PRKDC	0.0188001	0.205484	0.466	0.355	1	PRKDC	1.72584
TMX4	0.0190744	-0.212633	0.353	0.486	1	TMX4	1.71955
EIF3A	0.0193127	0.16218	0.82	0.696	1	EIF3A	1.71416
MED19	0.0193971	-0.155715	0.105	0.21	1	MED19	1.71226
IFFO2	0.0194678	-0.107118	0.03	0.101	1	IFFO2	1.71068
LIMS2	0.0198214	0.132289	0.158	0.065	1	LIMS2	1.70286
PPP2CA	0.0199649	0.127979	0.406	0.268	1	PPP2CA	1.69973
KXD1	0.0199811	0.178332	0.278	0.159	1	KXD1	1.69938
ZBTB17	0.0200422	-0.132591	0.045	0.123	1	ZBTB17	1.69805
IKBKE	0.0200776	0.16161	0.391	0.261	1	IKBKE	1.69729
DNAJC21	0.0202276	0.202867	0.474	0.341	1	DNAJC21	1.69406
MYD88	0.0203638	0.136037	0.286	0.167	1	MYD88	1.69114
FAM102A	0.0204063	-0.20338	0.301	0.413	1	FAM102A	1.69024
H3F3A	0.0207126	0.106179	0.992	0.993	1	H3F3A	1.68376
DLG1	0.0213895	-0.162947	0.188	0.312	1	DLG1	1.6698
SH3GL1	0.0214733	-0.140027	0.06	0.145	1	SH3GL1	1.6681
MRPL58	0.0215894	0.155161	0.316	0.21	1	MRPL58	1.66576
CUEDC2	0.0216321	0.172116	0.293	0.174	1	CUEDC2	1.6649
NFAT5	0.0217243	0.180856	0.391	0.268	1	NFAT5	1.66305
TRMT112	0.0218594	0.159549	0.789	0.688	1	TRMT112	1.66036
GPR183	0.0220467	0.195834	0.436	0.341	1	GPR183	1.65666
TINF2	0.0220497	0.176651	0.391	0.254	1	TINF2	1.6566
CST7	0.0220899	-0.212572	0.188	0.312	1	CST7	1.65581
SLC1A5	0.0221118	0.107366	0.15	0.065	1	SLC1A5	1.65538
SP3	0.0221478	0.175681	0.338	0.217	1	SP3	1.65467
AMZ2	0.0222509	0.12648	0.173	0.08	1	AMZ2	1.65265
HERPUD2	0.0224053	0.134734	0.195	0.094	1	HERPUD2	1.64965
GFI1	0.0224255	-0.179298	0.038	0.109	1	GFI1	1.64926
THAP3	0.0225293	-0.149147	0.068	0.152	1	THAP3	1.64725
UXS1	0.0228616	-0.199979	0.391	0.514	1	UXS1	1.64089
DCTD	0.0229122	0.151067	0.18	0.087	1	DCTD	1.63993
PML	0.0231549	0.155334	0.278	0.159	1	PML	1.63536
SMC2	0.0233376	0.17684	0.195	0.101	1	SMC2	1.63194
UBL5	0.0234965	0.168493	0.85	0.783	1	UBL5	1.629
ARHGDIB	0.0235989	0.125317	0.992	0.949	1	ARHGDIB	1.62711
DDX56	0.0238231	0.170081	0.241	0.138	1	DDX56	1.623
SDHB	0.023829	0.156467	0.316	0.203	1	SDHB	1.62289
SLC39A10	0.024048	-0.193705	0.218	0.333	1	SLC39A10	1.61892
RPS23	0.0241307	-0.0781805	1	1	1	RPS23	1.61743
DNAJC8	0.0241689	-0.167255	0.617	0.754	1	DNAJC8	1.61674
OGFRL1	0.0243122	0.131666	0.105	0.036	1	OGFRL1	1.61418
YARS	0.0243599	0.139533	0.331	0.196	1	YARS	1.61332
MED16	0.0246928	-0.0973326	0.15	0.283	1	MED16	1.60743
CKS2	0.024726	-0.164253	0.165	0.275	1	CKS2	1.60685
ZNF197	0.0249878	0.11316	0.128	0.051	1	ZNF197	1.60227
TIMM13	0.0252193	0.148415	0.383	0.254	1	TIMM13	1.59827
MYO1G	0.0252211	0.149992	0.684	0.565	1	MYO1G	1.59824
PURA	0.0253991	-0.205123	0.383	0.514	1	PURA	1.59518
CBLL1	0.0256353	0.186369	0.256	0.159	1	CBLL1	1.59116
GSPT2	0.0258622	-0.143246	0.053	0.13	1	GSPT2	1.58734
INF2	0.0259445	-0.160017	0.075	0.159	1	INF2	1.58596
MAGEH1	0.0261171	0.219802	0.308	0.188	1	MAGEH1	1.58308
WDR44	0.0262468	0.152976	0.135	0.058	1	WDR44	1.58092
DEF6	0.0267198	0.145446	0.534	0.406	1	DEF6	1.57317
SSH1	0.0268778	-0.0889732	0.045	0.123	1	SSH1	1.57061
NAAA	0.0272631	0.165649	0.331	0.217	1	NAAA	1.56443
TMEM30A	0.0272776	-0.178174	0.165	0.268	1	TMEM30A	1.56419
MRPS21	0.027585	0.147203	0.594	0.486	1	MRPS21	1.55933
BTG2	0.027681	-0.149659	0.541	0.674	1	BTG2	1.55782
SRP14	0.0276964	0.11653	0.985	0.978	1	SRP14	1.55758
METRN	0.0278084	-0.0762715	0.075	0.167	1	METRN	1.55582
DGKZ	0.0282785	-0.163982	0.436	0.58	1	DGKZ	1.54854
OASL	0.0283009	0.103239	0.15	0.065	1	OASL	1.5482
ANKIB1	0.028349	-0.154363	0.09	0.181	1	ANKIB1	1.54746
AL139246.5	0.0286604	-0.113451	0.053	0.13	1	AL139246.5	1.54272
SDE2	0.028806	0.154294	0.135	0.058	1	SDE2	1.54052
TMEM129	0.0288917	0.107844	0.128	0.051	1	TMEM129	1.53923
MAPKAP1	0.0288983	0.156476	0.203	0.109	1	MAPKAP1	1.53913
IER3IP1	0.0297775	-0.150794	0.248	0.37	1	IER3IP1	1.52611
NUMB	0.0298524	-0.109135	0.105	0.21	1	NUMB	1.52502
HLA-C	0.030142	0.0740038	1	0.993	1	HLA-C	1.52083
NCBP2-AS2	0.0301671	-0.170293	0.135	0.239	1	NCBP2-AS2	1.52047
LGALS1	0.0301738	0.302821	0.782	0.681	1	LGALS1	1.52037
ARID1B	0.0302102	-0.155074	0.421	0.565	1	ARID1B	1.51985
BID	0.0302741	0.127881	0.391	0.261	1	BID	1.51893
ANXA6	0.0304769	0.208252	0.564	0.435	1	ANXA6	1.51603
C14orf119	0.0305231	0.1846	0.451	0.341	1	C14orf119	1.51537
PSMG4	0.0305982	-0.147823	0.135	0.232	1	PSMG4	1.5143
MFGE8	0.030616	-0.142874	0.075	0.159	1	MFGE8	1.51405
PDE4D	0.0308495	0.133702	0.218	0.116	1	PDE4D	1.51075
E2F6	0.0311127	-0.166192	0.045	0.116	1	E2F6	1.50706
ZNF160	0.0312535	-0.127842	0.06	0.138	1	ZNF160	1.5051
CCDC32	0.0313287	0.144339	0.398	0.268	1	CCDC32	1.50406
RPL22	0.031341	-0.120381	1	1	1	RPL22	1.50389
ZDHHC13	0.0315652	0.120246	0.143	0.065	1	ZDHHC13	1.50079
HERC4	0.0316166	-0.1915	0.316	0.435	1	HERC4	1.50008
ATXN2L	0.0316424	-0.128568	0.135	0.246	1	ATXN2L	1.49973
RAB11FIP1	0.0317075	0.143673	0.579	0.449	1	RAB11FIP1	1.49884
EXOSC2	0.0320666	0.0850011	0.105	0.036	1	EXOSC2	1.49395
HDAC8	0.032459	-0.115264	0.053	0.13	1	HDAC8	1.48866
GABPB1	0.0325075	-0.181979	0.113	0.21	1	GABPB1	1.48802
RPL36	0.0325177	-0.0998127	1	1	1	RPL36	1.48788
ITGA5	0.032685	-0.108255	0.06	0.138	1	ITGA5	1.48565
BCAS4	0.0327101	-0.0862886	0.053	0.13	1	BCAS4	1.48532
SLC27A5	0.0329483	-0.127262	0.045	0.116	1	SLC27A5	1.48217
AGO1	0.0329629	-0.0904623	0.053	0.13	1	AGO1	1.48197
HDHD5	0.03304	-0.10962	0.075	0.159	1	HDHD5	1.48096
BICD1	0.0330467	0.0963073	0.135	0.058	1	BICD1	1.48087
KMT2E	0.0330716	0.142556	0.729	0.688	1	KMT2E	1.48055
ASAP1	0.0332173	-0.0982008	0.053	0.13	1	ASAP1	1.47864
DESI1	0.0333351	0.129447	0.331	0.21	1	DESI1	1.4771
FBXO31	0.0333522	-0.177974	0.038	0.101	1	FBXO31	1.47688
MAT2B	0.0334083	0.170737	0.414	0.304	1	MAT2B	1.47615
SLC20A2	0.0334216	-0.119402	0.06	0.138	1	SLC20A2	1.47597
CNOT6L	0.0334453	-0.180127	0.406	0.507	1	CNOT6L	1.47566
ZCCHC3	0.0338127	-0.155469	0.068	0.145	1	ZCCHC3	1.47092
ELF2	0.0339156	0.218857	0.301	0.196	1	ELF2	1.4696
HIVEP3	0.0340398	-0.148265	0.098	0.188	1	HIVEP3	1.46801
PAFAH1B1	0.0341405	0.158358	0.541	0.42	1	PAFAH1B1	1.46673
P2RX4	0.0341723	-0.138814	0.06	0.138	1	P2RX4	1.46633
SAMD4B	0.034407	-0.14898	0.075	0.152	1	SAMD4B	1.46335
CRYZL1	0.0344732	0.144034	0.18	0.094	1	CRYZL1	1.46252
EMC9	0.0345674	0.141753	0.15	0.072	1	EMC9	1.46133
ITGAL	0.0346662	-0.181771	0.481	0.558	1	ITGAL	1.46009
USP53	0.0347105	0.126038	0.143	0.065	1	USP53	1.45954
SPTAN1	0.0348545	0.156297	0.556	0.406	1	SPTAN1	1.45774
RGP1	0.0353257	-0.162368	0.158	0.254	1	RGP1	1.45191
SAFB	0.0354451	-0.164996	0.346	0.457	1	SAFB	1.45044
ACVR1	0.0357306	0.136625	0.143	0.065	1	ACVR1	1.44696
AC127521.1	0.0358601	0.0962522	0.113	0.043	1	AC127521.1	1.44539
KDM4B	0.0359217	0.106558	0.12	0.051	1	KDM4B	1.44464
YTHDF3	0.0362062	0.126014	0.12	0.051	1	YTHDF3	1.44122
AC009403.1	0.0362451	-0.0816851	0.06	0.138	1	AC009403.1	1.44075
LEMD3	0.0362857	0.132007	0.18	0.094	1	LEMD3	1.44026
FBXL15	0.0364022	-0.194553	0.301	0.399	1	FBXL15	1.43887
MRPS26	0.0364243	0.172624	0.331	0.217	1	MRPS26	1.43861
RIF1	0.0366928	-0.217893	0.286	0.406	1	RIF1	1.43542
MAP3K12	0.0367548	0.0980662	0.113	0.043	1	MAP3K12	1.43469
MTAP	0.0367585	-0.141849	0.12	0.21	1	MTAP	1.43464
SH2D3C	0.0367808	0.133803	0.12	0.051	1	SH2D3C	1.43438
NXT1	0.0372453	-0.12432	0.15	0.254	1	NXT1	1.42893
RPUSD4	0.0373165	-0.109404	0.038	0.101	1	RPUSD4	1.4281
FOXO3	0.0374211	-0.145188	0.053	0.123	1	FOXO3	1.42688
NLRC5	0.0377449	0.151156	0.293	0.188	1	NLRC5	1.42314
APLP2	0.0378741	-0.177671	0.195	0.29	1	APLP2	1.42166
KDM5C	0.0378945	-0.136262	0.075	0.152	1	KDM5C	1.42142
COX17	0.0380304	-0.159948	0.444	0.572	1	COX17	1.41987
PTPN6	0.0381033	0.15339	0.368	0.268	1	PTPN6	1.41904
ZBTB8OS	0.0384087	0.147065	0.391	0.268	1	ZBTB8OS	1.41557
TMEM8A	0.0384195	-0.17753	0.15	0.246	1	TMEM8A	1.41545
WDR37	0.0384241	-0.104267	0.06	0.138	1	WDR37	1.4154
RNF187	0.0384535	0.115448	0.383	0.254	1	RNF187	1.41506
PSME2	0.0385383	0.207034	0.835	0.833	1	PSME2	1.41411
PFN1	0.0385466	0.130376	1	0.986	1	PFN1	1.41401
TMEM41A	0.0385514	0.128663	0.12	0.051	1	TMEM41A	1.41396
SDF2	0.0385711	0.142744	0.459	0.319	1	SDF2	1.41374
CD2AP	0.038612	-0.11977	0.135	0.232	1	CD2AP	1.41328
EHBP1	0.0386142	-0.103591	0.038	0.101	1	EHBP1	1.41325
LINC00243	0.0386142	-0.114611	0.038	0.101	1	LINC00243	1.41325
SPOUT1	0.0389454	0.0747223	0.135	0.058	1	SPOUT1	1.40954
HLA-B	0.0389852	0.0582585	1	0.993	1	HLA-B	1.4091
DPP8	0.0391152	-0.096778	0.15	0.261	1	DPP8	1.40765
SON	0.0392699	-0.166223	0.744	0.848	1	SON	1.40594
TAOK1	0.0392991	-0.179464	0.165	0.261	1	TAOK1	1.40562
FUNDC2	0.0394005	0.129621	0.316	0.196	1	FUNDC2	1.4045
CASP4	0.0394979	-0.164254	0.496	0.601	1	CASP4	1.40343
PACS1	0.039715	-0.177216	0.286	0.399	1	PACS1	1.40105
TMEM80	0.0397977	-0.107045	0.068	0.145	1	TMEM80	1.40014
ACAT1	0.0399629	0.141268	0.195	0.109	1	ACAT1	1.39834
AKIRIN1	0.0400268	0.13952	0.451	0.312	1	AKIRIN1	1.39765
EIF5	0.0401483	0.150811	0.692	0.572	1	EIF5	1.39633
USP33	0.0402802	-0.154134	0.203	0.304	1	USP33	1.39491
CCDC69	0.0403351	0.133874	0.421	0.297	1	CCDC69	1.39432
ZNF568	0.0403625	-0.140716	0.045	0.109	1	ZNF568	1.39402
PANK3	0.0403957	-0.103402	0.053	0.123	1	PANK3	1.39366
DRG2	0.0406274	0.114836	0.173	0.087	1	DRG2	1.39118
PCID2	0.0407978	-0.17452	0.256	0.377	1	PCID2	1.38936
RMND5B	0.0412914	0.127691	0.211	0.123	1	RMND5B	1.38414
ABLIM1	0.0414021	-0.167765	0.143	0.239	1	ABLIM1	1.38298
MLLT10	0.0414384	0.124799	0.211	0.116	1	MLLT10	1.3826
GTF3C6	0.0415834	0.181283	0.707	0.63	1	GTF3C6	1.38108
TSHR	0.0419567	-0.137934	0.053	0.123	1	TSHR	1.3772
WASL	0.0419812	0.127134	0.128	0.058	1	WASL	1.37695
RARRES3	0.0421728	-0.137251	0.962	0.978	1	RARRES3	1.37497
LDB1	0.042275	-0.0959756	0.053	0.123	1	LDB1	1.37392
FAM126A	0.0422998	0.126617	0.376	0.261	1	FAM126A	1.37366
BTF3L4	0.0424327	-0.181539	0.226	0.326	1	BTF3L4	1.3723
44083	0.042524	-0.159028	0.571	0.696	1	44083	1.37137
MICU2	0.0425329	0.183627	0.323	0.232	1	MICU2	1.37127
PRR5	0.0425601	0.141071	0.15	0.072	1	PRR5	1.371
ELP2	0.0425831	-0.179227	0.218	0.319	1	ELP2	1.37076
ELK4	0.0431994	0.154317	0.301	0.196	1	ELK4	1.36452
RPS4X	0.0436895	-0.0878758	1	1	1	RPS4X	1.35962
CD151	0.0437367	0.1318	0.135	0.065	1	CD151	1.35915
AURKAIP1	0.0438656	-0.166709	0.677	0.761	1	AURKAIP1	1.35788
BCKDHB	0.0438971	-0.143671	0.053	0.123	1	BCKDHB	1.35756
TAP1	0.0439091	0.205302	0.669	0.616	1	TAP1	1.35745
ZNF688	0.0439403	-0.118448	0.18	0.29	1	ZNF688	1.35714
ATP6V1G1	0.0441125	-0.0949814	0.887	0.942	1	ATP6V1G1	1.35544
ACAA2	0.0441714	0.086626	0.421	0.304	1	ACAA2	1.35486
S100A4	0.0442589	0.110135	1	1	1	S100A4	1.354
COX15	0.0444889	0.135754	0.105	0.043	1	COX15	1.35175
ZFP36L2	0.0445804	-0.13937	0.759	0.819	1	ZFP36L2	1.35086
WWP1	0.0446353	-0.147435	0.263	0.384	1	WWP1	1.35032
CDC42	0.0447068	0.156259	0.887	0.79	1	CDC42	1.34963
FAM122A	0.0447829	-0.114271	0.173	0.268	1	FAM122A	1.34889
STX4	0.0447882	0.159127	0.331	0.225	1	STX4	1.34884
SEC14L1	0.0450501	0.180145	0.444	0.341	1	SEC14L1	1.3463
IL32	0.0450831	0.124544	1	1	1	IL32	1.34599
DUT	0.0452326	0.161403	0.383	0.268	1	DUT	1.34455
CCR7	0.0454592	-0.188779	0.398	0.507	1	CCR7	1.34238
EPHA4	0.0456925	-0.0740349	0.038	0.101	1	EPHA4	1.34015
RBM28	0.0457445	-0.15182	0.113	0.203	1	RBM28	1.33966
CETN3	0.0459126	-0.0879485	0.053	0.123	1	CETN3	1.33807
PSMD14	0.0459274	-0.17795	0.301	0.413	1	PSMD14	1.33793
TOB1	0.0459532	0.143247	0.331	0.225	1	TOB1	1.33768
DNTTIP1	0.0463288	0.133381	0.165	0.087	1	DNTTIP1	1.33415
ZNF318	0.0463773	-0.141228	0.06	0.13	1	ZNF318	1.33369
LSM12	0.046458	0.126791	0.368	0.261	1	LSM12	1.33294
MAPKAPK5-AS1	0.0465361	-0.17354	0.195	0.304	1	MAPKAPK5-AS1	1.33221
RPS2	0.0465992	-0.0950825	1	1	1	RPS2	1.33162
S100A11	0.0467663	0.137841	0.977	0.957	1	S100A11	1.33007
DHTKD1	0.0470874	0.124772	0.105	0.043	1	DHTKD1	1.32709
TRAF1	0.0472215	-0.208502	0.376	0.486	1	TRAF1	1.32586
RPS3A	0.0472867	-0.0833081	1	1	1	RPS3A	1.32526
SUGP2	0.0476429	-0.163481	0.113	0.196	1	SUGP2	1.322
LLGL2	0.0479157	0.104523	0.128	0.058	1	LLGL2	1.31952
PTPMT1	0.0480787	0.103949	0.158	0.08	1	PTPMT1	1.31805
PRPSAP2	0.0481299	0.109667	0.165	0.087	1	PRPSAP2	1.31759
IL2RG	0.0482449	0.112296	0.827	0.804	1	IL2RG	1.31655
EXOG	0.0485461	-0.135885	0.15	0.246	1	EXOG	1.31385
PRPF38A	0.048622	0.134001	0.316	0.217	1	PRPF38A	1.31317
DCTN2	0.0487595	0.179754	0.451	0.362	1	DCTN2	1.31194
AMN1	0.0488152	-0.0719945	0.038	0.101	1	AMN1	1.31144
CARF	0.0488663	-0.0910175	0.045	0.109	1	CARF	1.31099
TFG	0.0488718	0.153202	0.316	0.203	1	TFG	1.31094
HIRIP3	0.0489145	-0.1211	0.083	0.159	1	HIRIP3	1.31056
MAN1A2	0.0490295	-0.146738	0.271	0.384	1	MAN1A2	1.30954
MRPL33	0.0490898	0.0923208	0.534	0.435	1	MRPL33	1.30901
C1orf52	0.04916	0.0925156	0.188	0.101	1	C1orf52	1.30839
UTP6	0.0491669	0.164131	0.278	0.181	1	UTP6	1.30833
TUBA1A	0.0493299	0.149587	0.459	0.341	1	TUBA1A	1.30689
MLKL	0.0494508	0.141461	0.286	0.188	1	MLKL	1.30583
MYL12B	0.049576	0.0818373	0.977	0.957	1	MYL12B	1.30473
MFSD14B	0.0498089	-0.106066	0.06	0.13	1	MFSD14B	1.30269
NFKBIA	0.0499293	0.188514	0.602	0.493	1	NFKBIA	1.30164
TRIM38	0.0500178	-0.104079	0.436	0.558	1	TRIM38	1.30088
ATP6V1B2	0.050344	0.112013	0.218	0.123	1	ATP6V1B2	1.29805
TRERF1	0.0506148	0.151592	0.105	0.043	1	TRERF1	1.29572
PRPF19	0.0507712	0.110259	0.128	0.058	1	PRPF19	1.29438
ARL17A	0.0508154	-0.0914772	0.045	0.109	1	ARL17A	1.294
ELOVL5	0.0508412	0.15295	0.376	0.268	1	ELOVL5	1.29378
TMUB1	0.051142	0.126017	0.293	0.188	1	TMUB1	1.29122
REL	0.0513175	0.0950682	0.414	0.297	1	REL	1.28973
TADA3	0.0513295	0.104015	0.541	0.413	1	TADA3	1.28963
CLTC	0.0513973	0.173743	0.414	0.304	1	CLTC	1.28906
LNPK	0.0514282	0.0926131	0.105	0.043	1	LNPK	1.2888
VPS16	0.0514915	-0.168087	0.068	0.138	1	VPS16	1.28826
PHRF1	0.0515414	-0.149172	0.098	0.174	1	PHRF1	1.28784
CCDC28A	0.0518981	0.126229	0.301	0.196	1	CCDC28A	1.28485
PLCL2	0.0520398	-0.145104	0.128	0.21	1	PLCL2	1.28366
UBB	0.052054	0.1058	0.955	0.971	1	UBB	1.28355
EIF2B2	0.0522169	0.131626	0.233	0.152	1	EIF2B2	1.28219
PRAF2	0.0522524	0.0934137	0.105	0.043	1	PRAF2	1.28189
PDIA4	0.0524747	-0.139206	0.15	0.246	1	PDIA4	1.28005
ATP11A	0.0526686	0.0973282	0.105	0.043	1	ATP11A	1.27845
LSM8	0.0527898	-0.196706	0.541	0.623	1	LSM8	1.27745
PGPEP1	0.0529142	-0.141521	0.068	0.138	1	PGPEP1	1.27643
MTREX	0.052944	0.131359	0.233	0.138	1	MTREX	1.27618
LRPAP1	0.0529676	-0.163594	0.466	0.536	1	LRPAP1	1.27599
TUBA1C	0.053093	0.149911	0.293	0.196	1	TUBA1C	1.27496
STOM	0.0531313	-0.121664	0.083	0.159	1	STOM	1.27465
ARF4	0.0533393	0.100795	0.406	0.283	1	ARF4	1.27295
STIP1	0.0533821	-0.095629	0.233	0.355	1	STIP1	1.2726
LRRC28	0.0535094	0.0801536	0.105	0.043	1	LRRC28	1.27157
COX8A	0.0535094	0.109082	0.902	0.812	1	COX8A	1.27157
BBIP1	0.0536065	-0.109279	0.098	0.181	1	BBIP1	1.27078
AL662844.4	0.0536377	-0.118192	0.068	0.138	1	AL662844.4	1.27053
CEP95	0.0536532	-0.0953743	0.045	0.109	1	CEP95	1.2704
FAM50A	0.053663	0.161095	0.534	0.413	1	FAM50A	1.27032
JMJD1C	0.0537929	0.171446	0.376	0.268	1	JMJD1C	1.26928
C6orf106	0.0538396	-0.125756	0.128	0.217	1	C6orf106	1.2689
NIT1	0.0539413	0.140193	0.15	0.08	1	NIT1	1.26808
SNTB2	0.0539863	0.154526	0.226	0.138	1	SNTB2	1.26772
GSS	0.0540723	-0.129312	0.09	0.167	1	GSS	1.26703
MTMR12	0.0540791	-0.116337	0.053	0.116	1	MTMR12	1.26697
ADAM10	0.0541641	-0.141839	0.316	0.413	1	ADAM10	1.26629
COX6A1	0.0542721	0.127672	0.85	0.783	1	COX6A1	1.26542
NQO1	0.0543613	0.0922292	0.105	0.043	1	NQO1	1.26471
SGPP2	0.0544879	-0.0760448	0.045	0.109	1	SGPP2	1.2637
CLPTM1L	0.0544939	-0.152845	0.263	0.377	1	CLPTM1L	1.26365
HSPA1B	0.0548664	0.120134	0.113	0.051	1	HSPA1B	1.26069
ZFP14	0.0550191	-0.164255	0.128	0.217	1	ZFP14	1.25949
LRRC14	0.0551689	-0.0791845	0.053	0.123	1	LRRC14	1.25831
DHRS7	0.0552565	0.169181	0.519	0.442	1	DHRS7	1.25762
KTI12	0.0554829	-0.112755	0.068	0.138	1	KTI12	1.25584
RPL9	0.0556258	-0.0840199	1	1	1	RPL9	1.25472
ANXA4	0.0561858	0.125416	0.256	0.159	1	ANXA4	1.25037
BROX	0.0562289	0.188362	0.301	0.217	1	BROX	1.25004
ANXA2	0.0563932	0.144296	0.752	0.732	1	ANXA2	1.24877
PSMB10	0.0564711	0.0483631	0.263	0.159	1	PSMB10	1.24817
NQO2	0.0567902	0.118856	0.195	0.109	1	NQO2	1.24573
GPATCH2	0.0569233	-0.182258	0.12	0.203	1	GPATCH2	1.24471
RAP2A	0.0569489	-0.13969	0.105	0.181	1	RAP2A	1.24451
ACP5	0.057607	0.218854	0.353	0.254	1	ACP5	1.23952
RGS1	0.0579234	-0.103106	0.346	0.471	1	RGS1	1.23715
CASP3	0.0580045	0.143858	0.346	0.239	1	CASP3	1.23654
ELF1	0.0580421	0.165811	0.526	0.406	1	ELF1	1.23626
MLLT3	0.0583452	-0.120822	0.248	0.348	1	MLLT3	1.234
IBTK	0.0585396	-0.128938	0.218	0.326	1	IBTK	1.23255
CNOT4	0.0586084	-0.0954874	0.256	0.362	1	CNOT4	1.23204
DPYSL2	0.0586241	0.0673735	0.188	0.101	1	DPYSL2	1.23192
CCDC167	0.0587187	-0.14911	0.421	0.551	1	CCDC167	1.23122
PHF21A	0.0587407	-0.110708	0.068	0.138	1	PHF21A	1.23106
TMPO	0.0588569	0.234161	0.519	0.428	1	TMPO	1.2302
GLIPR2	0.0588893	0.155667	0.338	0.232	1	GLIPR2	1.22996
IVD	0.0589037	-0.0869616	0.098	0.181	1	IVD	1.22986
DGKH	0.0590684	0.152	0.323	0.225	1	DGKH	1.22864
TRIM8	0.0590706	-0.1287	0.135	0.225	1	TRIM8	1.22863
WAS	0.0590714	0.141181	0.519	0.42	1	WAS	1.22862
DIDO1	0.0592079	-0.0916182	0.195	0.304	1	DIDO1	1.22762
THOC1	0.0596119	-0.153301	0.158	0.239	1	THOC1	1.22467
RHNO1	0.0596649	0.110959	0.173	0.094	1	RHNO1	1.22428
SUMF2	0.0597004	0.146172	0.286	0.196	1	SUMF2	1.22402
STX6	0.0597627	0.112851	0.195	0.109	1	STX6	1.22357
UBR3	0.0599318	-0.122954	0.053	0.116	1	UBR3	1.22234
HAX1	0.0601553	0.133497	0.549	0.435	1	HAX1	1.22073
PPP2R5C	0.0603014	-0.209867	0.662	0.746	1	PPP2R5C	1.21967
PSMD1	0.0605096	0.14675	0.376	0.268	1	PSMD1	1.21818
CCDC186	0.0607817	0.0782575	0.459	0.348	1	CCDC186	1.21623
TPI1	0.0609763	0.162023	0.797	0.696	1	TPI1	1.21484
MRPS14	0.0609774	0.153452	0.233	0.152	1	MRPS14	1.21483
COL9A2	0.0610996	-0.0667265	0.045	0.109	1	COL9A2	1.21396
STAT3	0.0611822	0.129643	0.632	0.522	1	STAT3	1.21337
RHOF	0.0614144	-0.166417	0.436	0.543	1	RHOF	1.21173
NEMF	0.0614269	0.136939	0.459	0.355	1	NEMF	1.21164
GORASP2	0.0614775	-0.138638	0.143	0.232	1	GORASP2	1.21128
TAOK3	0.0615593	-0.206301	0.444	0.529	1	TAOK3	1.21071
SMNDC1	0.0616372	-0.0979028	0.18	0.29	1	SMNDC1	1.21016
PPP1R14B	0.0616644	-0.0705134	0.248	0.377	1	PPP1R14B	1.20997
XPO4	0.0616974	-0.0908985	0.053	0.116	1	XPO4	1.20973
PPP1R21	0.061824	0.113567	0.113	0.051	1	PPP1R21	1.20884
WDR13	0.0621621	0.105857	0.143	0.072	1	WDR13	1.20647
INTS12	0.062282	0.0943707	0.113	0.051	1	INTS12	1.20564
SPPL2B	0.0624987	-0.0707049	0.045	0.109	1	SPPL2B	1.20413
PSMA1	0.0625623	0.188653	0.729	0.645	1	PSMA1	1.20369
GBP1	0.0625998	0.162121	0.511	0.406	1	GBP1	1.20343
SLC9A3R1	0.0628858	-0.130794	0.406	0.522	1	SLC9A3R1	1.20145
CSNK1D	0.063021	-0.106262	0.218	0.319	1	CSNK1D	1.20051
ZFP91	0.0630391	-0.133434	0.113	0.188	1	ZFP91	1.20039
TYMP	0.0630611	0.156031	0.481	0.399	1	TYMP	1.20024
SUPT20H	0.0631069	0.140466	0.308	0.203	1	SUPT20H	1.19992
LAMP1	0.063187	-0.131107	0.361	0.464	1	LAMP1	1.19937
SAT2	0.0631994	-0.163372	0.256	0.355	1	SAT2	1.19929
KIF5B	0.0632015	0.166739	0.549	0.464	1	KIF5B	1.19927
RANBP3	0.0632474	0.117536	0.195	0.116	1	RANBP3	1.19896
AC093010.2	0.0632505	-0.0838565	0.083	0.159	1	AC093010.2	1.19894
TMEM9B	0.0633756	0.165807	0.414	0.312	1	TMEM9B	1.19808
TARS	0.0636229	-0.144923	0.165	0.246	1	TARS	1.19639
NDUFB2	0.0636604	0.146581	0.744	0.652	1	NDUFB2	1.19613
MZB1	0.0636731	0.0880413	0.113	0.051	1	MZB1	1.19604
NABP2	0.0636866	0.107071	0.15	0.08	1	NABP2	1.19595
FOXJ3	0.0638773	-0.113223	0.06	0.123	1	FOXJ3	1.19465
GOPC	0.0639488	-0.11699	0.15	0.246	1	GOPC	1.19417
POLR3GL	0.0640638	0.136454	0.436	0.319	1	POLR3GL	1.19339
RABGGTA	0.0641424	0.0929423	0.113	0.051	1	RABGGTA	1.19285
RAB10	0.0641621	0.164543	0.496	0.399	1	RAB10	1.19272
MPHOSPH10	0.0641702	-0.171306	0.256	0.348	1	MPHOSPH10	1.19267
RPL23A	0.0642574	-0.084434	1	1	1	RPL23A	1.19208
NCL	0.064636	-0.153891	0.865	0.913	1	NCL	1.18953
CERS4	0.0646958	0.11531	0.15	0.08	1	CERS4	1.18912
TRAPPC1	0.0648791	0.0855464	0.744	0.645	1	TRAPPC1	1.1879
ETHE1	0.0650007	0.0994582	0.444	0.333	1	ETHE1	1.18708
ERH	0.0650373	0.103165	0.812	0.696	1	ERH	1.18684
STARD7	0.0650494	0.126271	0.278	0.181	1	STARD7	1.18676
POMGNT1	0.0650504	0.110609	0.143	0.072	1	POMGNT1	1.18675
AC004865.2	0.0652154	-0.07894	0.083	0.159	1	AC004865.2	1.18565
RNF14	0.0653578	-0.106269	0.053	0.116	1	RNF14	1.1847
ZNRF2	0.0656322	0.168538	0.368	0.268	1	ZNRF2	1.18288
NCBP3	0.065796	0.124848	0.301	0.203	1	NCBP3	1.1818
RSRC1	0.066033	0.140655	0.316	0.225	1	RSRC1	1.18024
RPL10A	0.0661786	-0.0995268	1	1	1	RPL10A	1.17928
ENOPH1	0.0665326	-0.108741	0.158	0.246	1	ENOPH1	1.17697
GTF2H3	0.0665458	0.102221	0.15	0.08	1	GTF2H3	1.17688
TP53TG1	0.0666963	-0.0870383	0.15	0.254	1	TP53TG1	1.1759
WDR6	0.0668551	0.120739	0.173	0.101	1	WDR6	1.17487
MID1IP1	0.0670189	0.0819885	0.113	0.051	1	MID1IP1	1.1738
IL12RB1	0.0670666	0.111637	0.293	0.196	1	IL12RB1	1.17349
ELMOD2	0.0671805	0.107912	0.143	0.072	1	ELMOD2	1.17276
RAB14	0.0672668	-0.140516	0.383	0.478	1	RAB14	1.1722
TMEM65	0.0673697	-0.150516	0.158	0.239	1	TMEM65	1.17154
GOLGA8B	0.0674474	-0.108177	0.256	0.362	1	GOLGA8B	1.17103
LIN7C	0.0674689	-0.134985	0.15	0.232	1	LIN7C	1.1709
BLVRA	0.0675329	0.104536	0.188	0.109	1	BLVRA	1.17048
ZDHHC5	0.0675816	-0.123116	0.135	0.217	1	ZDHHC5	1.17017
SPSB3	0.068134	-0.123357	0.248	0.341	1	SPSB3	1.16664
ARL6IP5	0.068308	0.116657	0.94	0.899	1	ARL6IP5	1.16553
KLF12	0.0684161	-0.120189	0.098	0.174	1	KLF12	1.16484
TNFSF12	0.0684674	0.144134	0.549	0.471	1	TNFSF12	1.16452
TNFRSF1B	0.0686991	0.13131	0.82	0.783	1	TNFRSF1B	1.16305
THAP7	0.0687548	0.120865	0.218	0.13	1	THAP7	1.1627
LYST	0.0688091	-0.155475	0.338	0.413	1	LYST	1.16235
CGGBP1	0.0688998	0.102029	0.383	0.261	1	CGGBP1	1.16178
SERINC1	0.0689819	0.146581	0.323	0.225	1	SERINC1	1.16126
DLG3	0.0689949	0.113242	0.113	0.051	1	DLG3	1.16118
ITGB3BP	0.0697205	0.0912888	0.12	0.058	1	ITGB3BP	1.15664
PPP6R1	0.0698917	0.124899	0.323	0.225	1	PPP6R1	1.15557
TRPC4AP	0.0699129	0.119099	0.203	0.116	1	TRPC4AP	1.15544
RAB37	0.070067	0.0870583	0.226	0.13	1	RAB37	1.15449
FAM50B	0.0704767	-0.100933	0.075	0.145	1	FAM50B	1.15195
HPRT1	0.070503	0.187656	0.376	0.275	1	HPRT1	1.15179
DIRC2	0.0705081	0.0706537	0.113	0.051	1	DIRC2	1.15176
TRAT1	0.0705575	-0.146874	0.218	0.312	1	TRAT1	1.15146
ZNF282	0.0706603	-0.10463	0.045	0.101	1	ZNF282	1.15082
C22orf46	0.0706603	-0.115889	0.045	0.101	1	C22orf46	1.15082
LGALS3	0.0709979	0.239079	0.88	0.775	1	LGALS3	1.14875
STRADA	0.0710515	-0.107979	0.083	0.152	1	STRADA	1.14843
ZNF544	0.0713394	-0.131554	0.068	0.13	1	ZNF544	1.14667
TEN1	0.071343	0.112889	0.195	0.116	1	TEN1	1.14665
PSMB2	0.0714076	0.117331	0.669	0.543	1	PSMB2	1.14626
SPAG7	0.0714111	-0.144851	0.331	0.442	1	SPAG7	1.14623
G3BP1	0.0715642	-0.165354	0.474	0.551	1	G3BP1	1.1453
AASDHPPT	0.071571	-0.102627	0.143	0.232	1	AASDHPPT	1.14526
C15orf53	0.0718315	0.194696	0.278	0.203	1	C15orf53	1.14369
CCDC107	0.0720213	0.175027	0.594	0.514	1	CCDC107	1.14254
RPS6KA4	0.0720485	0.0677935	0.113	0.051	1	RPS6KA4	1.14238
BCKDK	0.0722158	0.113154	0.128	0.065	1	BCKDK	1.14137
LINC01588	0.0722731	-0.0963635	0.045	0.101	1	LINC01588	1.14102
ATM	0.0723538	-0.125419	0.602	0.659	1	ATM	1.14054
OAS1	0.0726095	0.0480904	0.398	0.297	1	OAS1	1.13901
PYGO2	0.0727034	-0.0666414	0.053	0.116	1	PYGO2	1.13845
ST6GALNAC4	0.0727555	-0.105465	0.068	0.13	1	ST6GALNAC4	1.13813
CBX7	0.0727829	-0.0708056	0.12	0.21	1	CBX7	1.13797
ZNF880	0.0728311	-0.0669371	0.098	0.181	1	ZNF880	1.13768
NUPL2	0.0729514	0.125999	0.256	0.167	1	NUPL2	1.13697
ORAI2	0.0729988	0.112515	0.218	0.138	1	ORAI2	1.13668
LSG1	0.0731832	0.116824	0.128	0.065	1	LSG1	1.13559
DEK	0.0733428	-0.156207	0.714	0.804	1	DEK	1.13464
SETD4	0.0733651	-0.0850011	0.045	0.101	1	SETD4	1.13451
VSIR	0.0735215	0.137433	0.466	0.377	1	VSIR	1.13359
PRPSAP1	0.0736619	0.12028	0.211	0.13	1	PRPSAP1	1.13276
BABAM1	0.0736837	0.165987	0.308	0.232	1	BABAM1	1.13263
WBP11	0.0747275	-0.126337	0.286	0.384	1	WBP11	1.12652
ARRDC1	0.074773	0.136176	0.338	0.232	1	ARRDC1	1.12625
FCRL3	0.0747981	-0.0999547	0.18	0.275	1	FCRL3	1.12611
COMTD1	0.0749905	0.16574	0.263	0.181	1	COMTD1	1.12499
CKS1B	0.0752208	0.0485066	0.12	0.058	1	CKS1B	1.12366
ALKBH4	0.0752538	-0.103092	0.06	0.123	1	ALKBH4	1.12347
IK	0.0755278	-0.158885	0.654	0.717	1	IK	1.12189
PSMD7	0.0756098	0.07243	0.564	0.449	1	PSMD7	1.12142
KAT5	0.0758085	0.100859	0.158	0.087	1	KAT5	1.12028
TMEM167B	0.0759833	0.127962	0.211	0.13	1	TMEM167B	1.11928
FNBP4	0.0760427	0.109785	0.481	0.384	1	FNBP4	1.11894
GSPT1	0.0760434	-0.102615	0.474	0.616	1	GSPT1	1.11894
ING3	0.0766766	0.122277	0.173	0.101	1	ING3	1.11534
DPP4	0.076722	-0.0974733	0.045	0.101	1	DPP4	1.11508
RAB9A	0.0768552	0.0787839	0.263	0.167	1	RAB9A	1.11433
EIF4H	0.0768639	-0.104425	0.308	0.42	1	EIF4H	1.11428
GNA13	0.076882	-0.138729	0.128	0.203	1	GNA13	1.11418
PI4KB	0.0769333	-0.120893	0.09	0.159	1	PI4KB	1.11389
FAM78A	0.0772513	0.116828	0.286	0.188	1	FAM78A	1.11209
EXOC2	0.0772915	0.110759	0.165	0.094	1	EXOC2	1.11187
CMTR1	0.0773068	0.0870658	0.12	0.058	1	CMTR1	1.11178
GNPAT	0.0776673	0.081524	0.241	0.152	1	GNPAT	1.10976
RXRB	0.0776682	0.108531	0.128	0.065	1	RXRB	1.10976
KIAA1147	0.0778241	0.141488	0.263	0.181	1	KIAA1147	1.10889
CALM1	0.0779353	0.0947456	0.985	1	1	CALM1	1.10827
CXorf38	0.078089	0.102975	0.293	0.188	1	CXorf38	1.10741
DENND2D	0.0782302	-0.128112	0.421	0.529	1	DENND2D	1.10663
TMEM147	0.0782578	-0.134543	0.331	0.42	1	TMEM147	1.10647
DGKE	0.0783741	-0.13939	0.211	0.297	1	DGKE	1.10583
RGCC	0.0785946	-0.151086	0.504	0.594	1	RGCC	1.10461
GPATCH8	0.0787196	-0.119285	0.323	0.442	1	GPATCH8	1.10392
RPL15	0.0788553	-0.066461	1	0.993	1	RPL15	1.10317
TMEM263	0.0790008	-0.0965496	0.113	0.196	1	TMEM263	1.10237
UBE2Q2	0.0790261	-0.0931772	0.143	0.232	1	UBE2Q2	1.10223
PPP4R1	0.0791601	-0.0943385	0.068	0.13	1	PPP4R1	1.10149
AGPAT2	0.0793077	-0.100153	0.098	0.174	1	AGPAT2	1.10068
INTS4	0.0795472	0.115138	0.165	0.094	1	INTS4	1.09938
ALG13	0.0797593	-0.125073	0.211	0.304	1	ALG13	1.09822
LY96	0.0801048	0.108644	0.346	0.246	1	LY96	1.09634
BTG3	0.0801691	0.156234	0.331	0.239	1	BTG3	1.09599
ZNF566	0.0801849	-0.11113	0.068	0.13	1	ZNF566	1.09591
WDFY1	0.0802008	0.124115	0.173	0.101	1	WDFY1	1.09582
PRKCA	0.0802689	0.0823015	0.195	0.116	1	PRKCA	1.09545
ASNA1	0.0802709	-0.11058	0.248	0.341	1	ASNA1	1.09544
RPAP2	0.0802709	-0.15138	0.248	0.341	1	RPAP2	1.09544
SRSF5	0.0802883	0.12455	0.902	0.848	1	SRSF5	1.09535
PIK3C3	0.0808401	-0.154675	0.18	0.254	1	PIK3C3	1.09237
PEX13	0.0811094	-0.0976519	0.083	0.152	1	PEX13	1.09093
NDUFA13	0.0811761	0.169576	0.541	0.464	1	NDUFA13	1.09057
CASK	0.0812029	-0.160504	0.414	0.514	1	CASK	1.09043
FBXO11	0.0813708	0.0964078	0.158	0.087	1	FBXO11	1.08953
PNPLA6	0.08139	0.10932	0.165	0.094	1	PNPLA6	1.08943
GFPT1	0.0819386	0.129853	0.188	0.116	1	GFPT1	1.08651
TMEM87A	0.08228	0.117606	0.406	0.297	1	TMEM87A	1.08471
HDAC2	0.0825514	-0.112597	0.098	0.167	1	HDAC2	1.08328
TFE3	0.082624	0.0989698	0.105	0.051	1	TFE3	1.08289
PTPRE	0.0832904	-0.108254	0.135	0.21	1	PTPRE	1.0794
ERP44	0.0834091	0.114212	0.406	0.297	1	ERP44	1.07879
CTSZ	0.0834796	-0.114855	0.353	0.449	1	CTSZ	1.07842
ANKRD13C	0.0834913	-0.122491	0.075	0.138	1	ANKRD13C	1.07836
CCL5	0.0835677	-0.0259757	0.195	0.29	1	CCL5	1.07796
BET1	0.0835996	0.115575	0.135	0.072	1	BET1	1.0778
TMEM179B	0.0836194	0.135003	0.444	0.348	1	TMEM179B	1.07769
TXN	0.0837497	0.140294	0.895	0.87	1	TXN	1.07702
CDK13	0.0840652	-0.117343	0.398	0.514	1	CDK13	1.07538
ELP3	0.084109	0.116741	0.113	0.058	1	ELP3	1.07516
CAMK2D	0.0841363	-0.107269	0.105	0.181	1	CAMK2D	1.07502
RERE	0.0841474	0.130244	0.188	0.116	1	RERE	1.07496
ARFIP1	0.0841728	-0.0842563	0.113	0.196	1	ARFIP1	1.07483
SNRPE	0.0843513	-0.11138	0.451	0.58	1	SNRPE	1.07391
REPIN1	0.0845393	0.0918608	0.128	0.065	1	REPIN1	1.07294
SHARPIN	0.084602	-0.165625	0.173	0.246	1	SHARPIN	1.07262
BRMS1	0.0852269	0.176238	0.308	0.217	1	BRMS1	1.06942
GRK5	0.0852307	-0.147301	0.083	0.145	1	GRK5	1.0694
RPS27A	0.085686	-0.0667917	1	1	1	RPS27A	1.06709
NOL10	0.0858721	0.107872	0.211	0.13	1	NOL10	1.06615
SPAST	0.0859565	-0.0500398	0.113	0.196	1	SPAST	1.06572
ORMDL1	0.0859987	-0.133594	0.549	0.616	1	ORMDL1	1.06551
STK39	0.0860487	-0.108637	0.083	0.152	1	STK39	1.06526
MRPL54	0.0861403	0.14653	0.579	0.471	1	MRPL54	1.06479
PCNX1	0.0864224	0.116046	0.248	0.167	1	PCNX1	1.06337
SYAP1	0.0868061	-0.132293	0.286	0.377	1	SYAP1	1.06145
ACAP2	0.0868068	-0.151824	0.353	0.435	1	ACAP2	1.06145
RAB29	0.0873315	-0.0889519	0.308	0.413	1	RAB29	1.05883
LARP7	0.087537	-0.172684	0.263	0.355	1	LARP7	1.05781
DYRK2	0.0875444	0.198024	0.391	0.312	1	DYRK2	1.05777
TPGS2	0.0877125	-0.124463	0.263	0.355	1	TPGS2	1.05694
GLYR1	0.088037	0.109171	0.241	0.159	1	GLYR1	1.05533
USE1	0.0883738	0.113496	0.376	0.268	1	USE1	1.05368
KATNBL1	0.088435	0.131806	0.263	0.181	1	KATNBL1	1.05338
CRK	0.0885004	-0.0810369	0.128	0.21	1	CRK	1.05305
DYNLRB1	0.088813	0.0905426	0.82	0.725	1	DYNLRB1	1.05152
LYSMD2	0.0889543	0.124692	0.376	0.283	1	LYSMD2	1.05083
ZC3H15	0.0890089	-0.1822	0.444	0.522	1	ZC3H15	1.05057
R3HCC1L	0.0890996	0.0967152	0.173	0.101	1	R3HCC1L	1.05012
RBMX2	0.0892356	-0.148949	0.18	0.261	1	RBMX2	1.04946
MED13L	0.0893833	-0.0846319	0.12	0.203	1	MED13L	1.04874
AP2S1	0.089509	0.147105	0.556	0.478	1	AP2S1	1.04813
CELF1	0.089522	0.11231	0.323	0.232	1	CELF1	1.04807
LRRC59	0.0897305	-0.120445	0.173	0.254	1	LRRC59	1.04706
MYDGF	0.0897427	0.132712	0.421	0.333	1	MYDGF	1.047
MAP3K1	0.0897839	-0.0963244	0.421	0.529	1	MAP3K1	1.0468
COX19	0.0901591	0.124152	0.278	0.188	1	COX19	1.04499
TM2D1	0.0902262	0.184619	0.429	0.348	1	TM2D1	1.04467
MGME1	0.0905637	0.139784	0.218	0.145	1	MGME1	1.04305
FAM114A2	0.0905747	0.0964169	0.173	0.101	1	FAM114A2	1.04299
PCYT2	0.0906201	0.101644	0.143	0.08	1	PCYT2	1.04278
CLTB	0.0906354	0.131603	0.519	0.399	1	CLTB	1.0427
KIF1BP	0.0909655	-0.123185	0.075	0.138	1	KIF1BP	1.04112
CCDC43	0.0910708	0.0849747	0.173	0.101	1	CCDC43	1.04062
TAPBP	0.0911722	0.119883	0.662	0.551	1	TAPBP	1.04014
TCEA1	0.0912722	-0.189371	0.564	0.667	1	TCEA1	1.03966
TXLNA	0.0912807	0.112914	0.256	0.167	1	TXLNA	1.03962
SNAPIN	0.0913565	0.154761	0.241	0.174	1	SNAPIN	1.03926
SRGAP2C	0.0915051	-0.0751244	0.053	0.109	1	SRGAP2C	1.03855
PATL2	0.0915996	-0.179921	0.15	0.225	1	PATL2	1.03811
LUC7L3	0.0916119	-0.134219	0.677	0.732	1	LUC7L3	1.03805
DDB2	0.0917476	0.145885	0.383	0.29	1	DDB2	1.03741
NCAPD3	0.0918928	0.0891789	0.105	0.051	1	NCAPD3	1.03672
KCTD5	0.0920579	-0.120631	0.083	0.145	1	KCTD5	1.03594
SNX10	0.0921618	-0.125097	0.09	0.152	1	SNX10	1.03545
ATP5MD	0.0921639	0.0914264	0.677	0.565	1	ATP5MD	1.03544
NDRG3	0.0924875	0.105058	0.113	0.058	1	NDRG3	1.03392
HLA-DQB1	0.0927586	0.186659	0.669	0.601	1	HLA-DQB1	1.03265
SRGN	0.0929729	0.0420247	0.962	0.949	1	SRGN	1.03164
NOP14	0.092984	0.121905	0.188	0.116	1	NOP14	1.03159
VCPIP1	0.0931024	0.105759	0.271	0.181	1	VCPIP1	1.03104
SGPP1	0.0931895	0.0881716	0.105	0.051	1	SGPP1	1.03063
SEC23A	0.0933348	-0.106807	0.158	0.239	1	SEC23A	1.02996
LIMK1	0.0934075	-0.0853873	0.053	0.109	1	LIMK1	1.02962
STARD3	0.093487	0.0978116	0.211	0.13	1	STARD3	1.02925
ANKRD39	0.0935989	0.145806	0.248	0.174	1	ANKRD39	1.02873
FIP1L1	0.0936035	-0.148444	0.256	0.341	1	FIP1L1	1.02871
FBLN5	0.0938765	-0.0866918	0.06	0.116	1	FBLN5	1.02744
CD53	0.0940043	0.135567	0.835	0.826	1	CD53	1.02685
XRCC1	0.0940486	-0.0939137	0.053	0.109	1	XRCC1	1.02665
RPS14	0.0942002	-0.0507941	1	1	1	RPS14	1.02595
43899	0.0945003	-0.160144	0.188	0.268	1	43899	1.02457
TIPARP	0.0946047	0.108763	0.173	0.101	1	TIPARP	1.02409
KMT5A	0.0946634	0.127913	0.18	0.109	1	KMT5A	1.02382
ARIH1	0.0947598	0.138608	0.211	0.138	1	ARIH1	1.02338
GZMK	0.0948612	-0.0235029	0.098	0.174	1	GZMK	1.02291
ZNF586	0.0951619	0.0871979	0.105	0.051	1	ZNF586	1.02154
TENT2	0.0952251	0.12893	0.211	0.138	1	TENT2	1.02125
ABCF3	0.0953415	-0.0776767	0.053	0.109	1	ABCF3	1.02072
U2AF1L4	0.0955112	0.13059	0.218	0.145	1	U2AF1L4	1.01995
AKIP1	0.0957112	0.148996	0.241	0.167	1	AKIP1	1.01904
NUP37	0.0957927	0.0982201	0.135	0.072	1	NUP37	1.01867
KANSL1	0.0957981	-0.144608	0.459	0.529	1	KANSL1	1.01864
MDN1	0.095809	0.0485906	0.165	0.094	1	MDN1	1.01859
ZNHIT6	0.096161	-0.128712	0.135	0.21	1	ZNHIT6	1.017
KBTBD2	0.0961779	0.138043	0.143	0.08	1	KBTBD2	1.01692
SLC41A3	0.0964177	0.13001	0.165	0.101	1	SLC41A3	1.01584
MBTPS1	0.0965959	-0.140197	0.188	0.268	1	MBTPS1	1.01504
RBM25	0.0968303	0.111603	0.707	0.623	1	RBM25	1.01399
C2orf74	0.0968916	0.114149	0.195	0.123	1	C2orf74	1.01371
USP10	0.0970194	-0.125409	0.188	0.268	1	USP10	1.01314
LAIR1	0.0971041	-0.122489	0.105	0.174	1	LAIR1	1.01276
C6orf203	0.0976227	-0.114816	0.105	0.174	1	C6orf203	1.01045
HIKESHI	0.0978114	0.163882	0.353	0.268	1	HIKESHI	1.00961
F5	0.097998	0.168752	0.263	0.181	1	F5	1.00878
VPS37A	0.0980782	0.0865498	0.203	0.13	1	VPS37A	1.00843
ZFYVE21	0.0980963	-0.0609754	0.068	0.13	1	ZFYVE21	1.00835
AP2B1	0.0983464	-0.105185	0.286	0.391	1	AP2B1	1.00724
LDHB	0.0983776	-0.108064	0.932	0.986	1	LDHB	1.0071
CASP8	0.0984326	-0.094533	0.526	0.638	1	CASP8	1.00686
LEF1	0.0986433	-0.11108	0.406	0.507	1	LEF1	1.00593
BRWD1	0.0986972	-0.103256	0.203	0.29	1	BRWD1	1.0057
SLC35C2	0.0987145	-0.13532	0.203	0.275	1	SLC35C2	1.00562
SENP5	0.0987771	0.0932198	0.173	0.101	1	SENP5	1.00534
POLRMT	0.0989687	-0.0913492	0.075	0.138	1	POLRMT	1.0045
KIF3A	0.0990796	0.11745	0.165	0.101	1	KIF3A	1.00402
ZC3H6	0.0994505	0.0990517	0.158	0.094	1	ZC3H6	1.00239
PIK3R1	0.0995364	-0.157412	0.511	0.594	1	PIK3R1	1.00202
BAG6	0.0996189	-0.0852459	0.098	0.167	1	BAG6	1.00166
FAM204A	0.0996488	0.137142	0.406	0.319	1	FAM204A	1.00153
DDX21	0.0998294	-0.114244	0.316	0.42	1	DDX21	1.00074
TAF13	0.0998858	-0.0920628	0.06	0.116	1	TAF13	1.0005
KCMF1	0.10009	0.0993988	0.368	0.261	1	KCMF1	0.999611
SASH3	0.100152	-0.136844	0.241	0.319	1	SASH3	0.999339
PRRC2B	0.100455	-0.115082	0.248	0.333	1	PRRC2B	0.998028
CEBPB	0.10081	-0.131924	0.278	0.37	1	CEBPB	0.996495
TPP1	0.100914	0.190822	0.436	0.355	1	TPP1	0.996049
MMGT1	0.101018	0.101318	0.12	0.065	1	MMGT1	0.9956
COA3	0.101114	-0.0899818	0.256	0.362	1	COA3	0.995187
BTBD1	0.101164	-0.062066	0.068	0.13	1	BTBD1	0.994975
RAD51C	0.101178	0.16573	0.233	0.167	1	RAD51C	0.994913
XIAP	0.101258	-0.141413	0.248	0.333	1	XIAP	0.994573
S100A6	0.101424	0.103076	0.992	1	1	S100A6	0.993857
NETO2	0.101864	0.216252	0.188	0.123	1	NETO2	0.99198
SERINC5	0.10212	-0.114123	0.105	0.174	1	SERINC5	0.990887
NRBP1	0.102307	0.100616	0.338	0.232	1	NRBP1	0.990096
LRRC8A	0.102309	0.111788	0.12	0.065	1	LRRC8A	0.990085
NPC1	0.102402	-0.141939	0.075	0.13	1	NPC1	0.98969
PREX1	0.102508	0.163451	0.383	0.312	1	PREX1	0.989244
ATRAID	0.103161	0.0855876	0.556	0.442	1	ATRAID	0.986486
CTC1	0.103176	-0.0959974	0.075	0.138	1	CTC1	0.986422
MAP3K13	0.103388	0.0701672	0.105	0.051	1	MAP3K13	0.985528
CBR1	0.103545	0.13025	0.226	0.152	1	CBR1	0.984871
DGKD	0.103613	0.120024	0.12	0.065	1	DGKD	0.984584
CENPC	0.103625	-0.11294	0.308	0.391	1	CENPC	0.984536
GRSF1	0.103671	0.14173	0.278	0.203	1	GRSF1	0.984341
TCF7	0.103695	-0.138366	0.293	0.384	1	TCF7	0.984241
ZBTB44	0.104225	0.186627	0.263	0.196	1	ZBTB44	0.98203
GGNBP2	0.104301	-0.119829	0.383	0.464	1	GGNBP2	0.981711
ZNF44	0.104579	-0.0992831	0.098	0.167	1	ZNF44	0.980555
SF3A2	0.104751	0.102154	0.256	0.174	1	SF3A2	0.979843
ZNF32	0.104829	-0.115332	0.165	0.239	1	ZNF32	0.979516
PIGH	0.104894	0.0675449	0.135	0.072	1	PIGH	0.97925
CDK11B	0.104919	-0.0969011	0.135	0.21	1	CDK11B	0.979144
RPS6KA3	0.104967	-0.123621	0.233	0.319	1	RPS6KA3	0.978949
GIMAP6	0.104969	-0.131215	0.256	0.333	1	GIMAP6	0.978938
RPL13	0.105032	-0.0621974	1	1	1	RPL13	0.978678
OS9	0.105197	-0.158797	0.278	0.377	1	OS9	0.977995
EMC7	0.105424	0.150853	0.556	0.486	1	EMC7	0.97706
ITGB7	0.105627	0.145809	0.534	0.413	1	ITGB7	0.976227
SLC25A45	0.105713	-0.095475	0.18	0.268	1	SLC25A45	0.975872
CAB39	0.105807	-0.115754	0.316	0.413	1	CAB39	0.975485
ITPR2	0.106123	-0.145082	0.226	0.312	1	ITPR2	0.974192
SF3B5	0.106172	0.109324	0.654	0.667	1	SF3B5	0.97399
EIF4B	0.106313	-0.0993393	0.752	0.804	1	EIF4B	0.973413
PEX16	0.10645	-0.187145	0.241	0.312	1	PEX16	0.972853
PSMC5	0.106451	0.113869	0.677	0.638	1	PSMC5	0.972851
DBI	0.106644	0.131859	0.82	0.797	1	DBI	0.972063
NF1	0.106733	0.0953303	0.241	0.167	1	NF1	0.9717
SIRT1	0.107343	-0.115998	0.053	0.101	1	SIRT1	0.969226
EYA3	0.107433	0.0836116	0.135	0.072	1	EYA3	0.968861
ARF5	0.107496	-0.12515	0.271	0.355	1	ARF5	0.968609
DLST	0.107766	-0.0995204	0.098	0.159	1	DLST	0.96752
WAC-AS1	0.108239	-0.117875	0.203	0.29	1	WAC-AS1	0.965618
APPBP2	0.108312	-0.10428	0.158	0.239	1	APPBP2	0.965325
APBB1	0.108442	0.0549147	0.105	0.051	1	APBB1	0.964802
PTGES3	0.108515	0.0972927	0.865	0.754	1	PTGES3	0.96451
STX11	0.108721	0.0613733	0.135	0.072	1	STX11	0.963686
DNAJA1	0.108827	0.127141	0.662	0.63	1	DNAJA1	0.963262
RRAS	0.108892	0.101068	0.15	0.087	1	RRAS	0.963004
RPL7A	0.108912	-0.058054	1	1	1	RPL7A	0.962925
TOPORS	0.109053	-0.164109	0.195	0.283	1	TOPORS	0.962363
FBXO25	0.109105	0.0615898	0.113	0.058	1	FBXO25	0.962155
CD55	0.109239	0.103256	0.331	0.239	1	CD55	0.961622
CEACAM1	0.109267	0.149104	0.398	0.326	1	CEACAM1	0.961511
PTPRJ	0.109477	-0.120351	0.173	0.246	1	PTPRJ	0.960676
ZNF654	0.109997	0.0655537	0.143	0.08	1	ZNF654	0.95862
USP16	0.110177	0.161276	0.466	0.399	1	USP16	0.957909
PPIA	0.110272	-0.109959	0.962	0.949	1	PPIA	0.957533
CEP350	0.110663	-0.106634	0.323	0.428	1	CEP350	0.955996
ANKRD11	0.110703	-0.183311	0.722	0.783	1	ANKRD11	0.955842
AKT2	0.11075	-0.102269	0.128	0.196	1	AKT2	0.955658
CD58	0.110868	0.111283	0.346	0.246	1	CD58	0.955192
PRCC	0.11087	0.0934529	0.195	0.123	1	PRCC	0.955185
ZNHIT2	0.111049	-0.0757183	0.06	0.116	1	ZNHIT2	0.954485
FLOT2	0.111184	-0.128877	0.218	0.297	1	FLOT2	0.953959
VTA1	0.111305	0.13864	0.158	0.101	1	VTA1	0.953485
SLC35B3	0.111334	-0.103984	0.075	0.13	1	SLC35B3	0.953374
SYF2	0.111349	0.0660728	0.647	0.587	1	SYF2	0.953313
MAP3K2	0.111374	0.109826	0.271	0.188	1	MAP3K2	0.953214
HIST1H1C	0.111443	-0.151776	0.233	0.319	1	HIST1H1C	0.952949
URI1	0.111443	-0.132002	0.504	0.587	1	URI1	0.952948
CYP4V2	0.112168	0.110094	0.128	0.072	1	CYP4V2	0.950132
ARFGEF1	0.112169	0.133689	0.376	0.29	1	ARFGEF1	0.950127
RSPRY1	0.11223	0.139109	0.158	0.094	1	RSPRY1	0.949892
SQOR	0.112244	-0.0743268	0.316	0.428	1	SQOR	0.949836
MUM1	0.112379	0.175035	0.195	0.13	1	MUM1	0.949314
PLAA	0.112466	-0.0896544	0.06	0.116	1	PLAA	0.948977
ARID4B	0.112582	0.0853365	0.729	0.609	1	ARID4B	0.948531
PMCH	0.112637	-0.118371	0.083	0.145	1	PMCH	0.94832
DNAJB11	0.112779	-0.100116	0.158	0.239	1	DNAJB11	0.947771
TLK2	0.11284	0.121173	0.158	0.094	1	TLK2	0.947537
TMEM60	0.112853	-0.126047	0.18	0.246	1	TMEM60	0.947488
P4HB	0.112863	0.105345	0.489	0.37	1	P4HB	0.947447
RAB30	0.113396	-0.0738076	0.09	0.152	1	RAB30	0.945402
BDP1	0.113667	-0.128959	0.368	0.457	1	BDP1	0.944367
DCXR	0.11367	-0.0980594	0.233	0.319	1	DCXR	0.944355
HP1BP3	0.113725	0.0855071	0.677	0.594	1	HP1BP3	0.944146
KCTD9	0.113819	0.0751399	0.12	0.065	1	KCTD9	0.943784
IZUMO4	0.113914	-0.0937409	0.083	0.145	1	IZUMO4	0.943421
ZYG11B	0.11394	0.102076	0.173	0.109	1	ZYG11B	0.943322
SC5D	0.114019	-0.0910511	0.09	0.152	1	SC5D	0.943021
AC073111.5	0.114159	0.0781487	0.113	0.058	1	AC073111.5	0.942492
DYNC1I2	0.114332	0.0972973	0.338	0.261	1	DYNC1I2	0.941831
SCOC	0.114529	0.106052	0.173	0.109	1	SCOC	0.941084
GPX7	0.114645	-0.0957537	0.09	0.152	1	GPX7	0.940643
GRAMD1A	0.114826	-0.102473	0.301	0.384	1	GRAMD1A	0.939958
ASH2L	0.115203	-0.0871266	0.083	0.145	1	ASH2L	0.938535
AGFG1	0.115213	0.103286	0.271	0.188	1	AGFG1	0.938498
UBR5	0.115685	0.134878	0.331	0.261	1	UBR5	0.936724
PAAF1	0.115694	-0.0706259	0.098	0.167	1	PAAF1	0.93669
HPCAL1	0.115719	-0.149866	0.323	0.42	1	HPCAL1	0.936597
THUMPD3	0.115774	0.0883469	0.15	0.087	1	THUMPD3	0.936389
SMIM8	0.116018	-0.137642	0.135	0.196	1	SMIM8	0.935475
SMIM19	0.116051	0.0569618	0.398	0.312	1	SMIM19	0.935351
KIAA0930	0.116073	-0.0735136	0.06	0.116	1	KIAA0930	0.93527
MIS18BP1	0.116369	-0.105795	0.368	0.471	1	MIS18BP1	0.934165
TMEM259	0.116802	0.140293	0.338	0.254	1	TMEM259	0.93255
METTL15	0.116805	-0.0646813	0.06	0.116	1	METTL15	0.932539
BOLA1	0.116916	0.0925039	0.165	0.101	1	BOLA1	0.932127
RNF214	0.116959	-0.104638	0.143	0.217	1	RNF214	0.931965
SLC30A7	0.117168	-0.0920407	0.113	0.181	1	SLC30A7	0.931192
CCR6	0.117227	0.235594	0.218	0.159	1	CCR6	0.930972
DNAJA3	0.11733	0.108077	0.135	0.08	1	DNAJA3	0.930591
HPS5	0.117407	-0.142722	0.098	0.159	1	HPS5	0.930304
EXOSC1	0.117411	0.102124	0.459	0.362	1	EXOSC1	0.930291
CCDC92	0.117559	0.0550614	0.105	0.051	1	CCDC92	0.929746
CD28	0.117641	0.128742	0.451	0.355	1	CD28	0.929441
SLC25A12	0.117789	-0.0844945	0.068	0.123	1	SLC25A12	0.928896
NUP188	0.118081	-0.109259	0.075	0.13	1	NUP188	0.927819
LINC00667	0.118111	-0.117318	0.105	0.174	1	LINC00667	0.927708
DNAJC18	0.118117	0.0723171	0.12	0.065	1	DNAJC18	0.927688
NMD3	0.118345	0.0619348	0.165	0.094	1	NMD3	0.92685
LAPTM4A	0.118433	-0.108551	0.361	0.457	1	LAPTM4A	0.926527
RNF111	0.118476	-0.0751633	0.083	0.145	1	RNF111	0.92637
CSTF1	0.118675	0.0974446	0.211	0.138	1	CSTF1	0.925641
STX5	0.119079	0.10448	0.165	0.101	1	STX5	0.924166
STAMBP	0.119088	0.119752	0.158	0.094	1	STAMBP	0.924133
PEPD	0.119158	0.0658214	0.331	0.225	1	PEPD	0.923875
NSFL1C	0.11926	-0.091206	0.165	0.239	1	NSFL1C	0.923504
ESYT1	0.119453	0.0942727	0.368	0.283	1	ESYT1	0.922803
UNC93B1	0.119577	0.10049	0.12	0.065	1	UNC93B1	0.922351
CCDC12	0.119733	-0.112491	0.421	0.507	1	CCDC12	0.921786
DALRD3	0.119789	-0.0957102	0.135	0.21	1	DALRD3	0.921583
PPIL3	0.119901	0.108365	0.211	0.145	1	PPIL3	0.921179
RNF207	0.120015	0.101297	0.165	0.101	1	RNF207	0.920763
ZNF592	0.120157	0.0684067	0.113	0.058	1	ZNF592	0.920249
SAR1B	0.120196	0.0689143	0.368	0.261	1	SAR1B	0.920111
SNAI3	0.120369	0.0948507	0.158	0.094	1	SNAI3	0.919484
NGLY1	0.120505	-0.10952	0.15	0.217	1	NGLY1	0.918994
ZNF791	0.120657	-0.0888178	0.301	0.399	1	ZNF791	0.918446
RPS3	0.120862	-0.0535163	1	1	1	RPS3	0.917709
CYB5B	0.120867	-0.0989708	0.233	0.326	1	CYB5B	0.917692
ATXN7L3B	0.121015	-0.115462	0.293	0.362	1	ATXN7L3B	0.917162
CLIC3	0.121203	0.148122	0.128	0.072	1	CLIC3	0.916486
USP42	0.121393	-0.103604	0.068	0.123	1	USP42	0.915805
TAGLN2	0.121545	0.11372	0.677	0.609	1	TAGLN2	0.915261
NFE2L2	0.12175	0.118867	0.496	0.435	1	NFE2L2	0.914532
CORO2A	0.12187	0.0668245	0.143	0.08	1	CORO2A	0.914104
NCOR2	0.121943	-0.0782737	0.113	0.181	1	NCOR2	0.913843
ZSCAN32	0.122031	-0.0768999	0.06	0.116	1	ZSCAN32	0.91353
SNF8	0.122259	-0.11857	0.429	0.536	1	SNF8	0.91272
TNFAIP8L1	0.122281	-0.108888	0.075	0.13	1	TNFAIP8L1	0.912639
AC243960.1	0.122298	-0.137039	0.301	0.391	1	AC243960.1	0.91258
PTAR1	0.122323	0.0865199	0.15	0.087	1	PTAR1	0.912492
UBA2	0.122364	-0.133777	0.346	0.428	1	UBA2	0.912345
C22orf39	0.122558	-0.119309	0.128	0.196	1	C22orf39	0.911659
LAGE3	0.122664	0.144214	0.256	0.188	1	LAGE3	0.911283
DDX24	0.122818	-0.106191	0.805	0.841	1	DDX24	0.910739
PPP1R10	0.123225	-0.125668	0.368	0.449	1	PPP1R10	0.909302
ARHGAP9	0.123454	0.133039	0.391	0.326	1	ARHGAP9	0.908496
NUP50	0.123454	-0.105161	0.301	0.413	1	NUP50	0.908496
KIF1C	0.123542	0.0929246	0.135	0.08	1	KIF1C	0.908185
MYO5C	0.123555	-0.0824136	0.053	0.101	1	MYO5C	0.90814
RNF167	0.123824	0.167346	0.391	0.319	1	RNF167	0.907196
DCPS	0.124062	0.0994276	0.256	0.174	1	DCPS	0.906362
TMEM106C	0.124193	-0.0991438	0.12	0.188	1	TMEM106C	0.905904
ATP5ME	0.124196	0.0633673	0.632	0.529	1	ATP5ME	0.905891
CCM2	0.124342	-0.142158	0.617	0.696	1	CCM2	0.905381
TRAF7	0.124549	0.115577	0.143	0.087	1	TRAF7	0.904658
MSL1	0.12463	0.0920582	0.188	0.116	1	MSL1	0.904377
MAD2L1	0.124801	0.101936	0.12	0.065	1	MAD2L1	0.903783
TENT4B	0.125004	-0.0807838	0.113	0.181	1	TENT4B	0.903077
MTIF3	0.125237	-0.12928	0.391	0.478	1	MTIF3	0.902266
ARHGEF2	0.125413	-0.113717	0.218	0.297	1	ARHGEF2	0.901657
PAN3	0.125539	-0.0794838	0.105	0.174	1	PAN3	0.90122
EFCAB14	0.125622	-0.121061	0.256	0.326	1	EFCAB14	0.900933
CDK5RAP3	0.125623	0.123075	0.18	0.116	1	CDK5RAP3	0.900931
CDK17	0.125832	-0.0628028	0.068	0.123	1	CDK17	0.900209
THOC7	0.125863	-0.136422	0.429	0.5	1	THOC7	0.900104
DDHD1	0.125926	-0.0914915	0.459	0.551	1	DDHD1	0.899885
IDS	0.125971	-0.126576	0.444	0.536	1	IDS	0.899728
GNAI3	0.126149	-0.124399	0.368	0.442	1	GNAI3	0.899115
GFER	0.126598	-0.113666	0.188	0.261	1	GFER	0.897573
HNRNPM	0.12663	0.058092	0.744	0.645	1	HNRNPM	0.897464
MORN3	0.126655	-0.0534666	0.06	0.116	1	MORN3	0.897379
HDDC2	0.126697	-0.12283	0.293	0.355	1	HDDC2	0.897232
MAP2K7	0.126703	-0.0984737	0.143	0.21	1	MAP2K7	0.897212
TRMT11	0.126703	-0.100922	0.143	0.21	1	TRMT11	0.897212
RPLP2	0.126921	-0.0637254	1	1	1	RPLP2	0.896468
GLUD1	0.127182	-0.0989098	0.195	0.275	1	GLUD1	0.895576
PCMT1	0.127204	0.102757	0.519	0.478	1	PCMT1	0.895498
RPL18A	0.127307	-0.051779	1	1	1	RPL18A	0.895148
NBAS	0.127326	-0.0256713	0.083	0.145	1	NBAS	0.895084
GNPTAB	0.12736	0.130266	0.481	0.391	1	GNPTAB	0.894967
VBP1	0.127374	0.173527	0.436	0.37	1	VBP1	0.89492
DTD1	0.127506	-0.109916	0.15	0.217	1	DTD1	0.894468
PCMTD2	0.127743	-0.0759777	0.09	0.152	1	PCMTD2	0.893663
CEP104	0.127785	0.0894037	0.128	0.072	1	CEP104	0.89352
MOGS	0.127824	0.0937212	0.135	0.08	1	MOGS	0.893387
SYNE1	0.127834	-0.188306	0.353	0.435	1	SYNE1	0.893354
RAB1B	0.127864	-0.101332	0.165	0.239	1	RAB1B	0.893252
IP6K1	0.127866	0.116601	0.211	0.145	1	IP6K1	0.893246
MHENCR	0.127952	-0.108556	0.105	0.167	1	MHENCR	0.892952
ZHX1	0.128604	-0.10134	0.105	0.167	1	ZHX1	0.890745
PABPN1	0.12866	0.11407	0.414	0.333	1	PABPN1	0.890555
COG1	0.128861	-0.0652405	0.068	0.123	1	COG1	0.88988
ADA	0.128861	-0.0688777	0.068	0.123	1	ADA	0.88988
TMEM161B-AS1	0.128942	-0.0840146	0.053	0.101	1	TMEM161B-AS1	0.889604
RPP25L	0.128999	0.100177	0.211	0.138	1	RPP25L	0.889413
POLR3A	0.12921	-0.115865	0.06	0.109	1	POLR3A	0.888704
NIN	0.12921	0.0569382	0.353	0.254	1	NIN	0.888704
SLC25A3	0.129231	0.0687928	0.887	0.855	1	SLC25A3	0.888632
ZKSCAN1	0.129382	-0.131422	0.203	0.275	1	ZKSCAN1	0.888127
DCTN6	0.129393	-0.0801946	0.15	0.225	1	DCTN6	0.888089
PDRG1	0.129439	-0.0643969	0.083	0.145	1	PDRG1	0.887934
NPAT	0.129601	-0.0934685	0.173	0.246	1	NPAT	0.887392
BAD	0.129625	0.0962515	0.211	0.145	1	BAD	0.887312
RPL18	0.129644	-0.0727197	1	1	1	RPL18	0.887246
PPP3CB	0.129648	0.0922279	0.203	0.13	1	PPP3CB	0.887235
RPL13A	0.129841	-0.0418497	1	1	1	RPL13A	0.886589
FTH1	0.130234	0.0732702	1	0.993	1	FTH1	0.885276
OSBPL2	0.130284	-0.103252	0.075	0.13	1	OSBPL2	0.885109
OAS3	0.130328	0.0664074	0.158	0.094	1	OAS3	0.884964
CISD2	0.130534	0.125691	0.316	0.246	1	CISD2	0.884276
STIM1	0.130653	0.103402	0.195	0.13	1	STIM1	0.883879
KLHL6	0.130684	0.0882264	0.195	0.123	1	KLHL6	0.883778
FAM13B	0.130786	0.102976	0.211	0.138	1	FAM13B	0.88344
CD96	0.13116	-0.105111	0.278	0.355	1	CD96	0.882198
ARL5A	0.131269	0.0999837	0.195	0.13	1	ARL5A	0.881837
RPRD1A	0.131272	0.094699	0.105	0.058	1	RPRD1A	0.881827
CYTH1	0.131521	0.160739	0.421	0.341	1	CYTH1	0.881004
SNX27	0.131691	-0.105917	0.113	0.174	1	SNX27	0.880445
GTPBP8	0.132197	0.119524	0.195	0.13	1	GTPBP8	0.878777
TNFSF13B	0.132394	0.0764778	0.158	0.094	1	TNFSF13B	0.878132
ADGRE1	0.132438	-0.147707	0.098	0.159	1	ADGRE1	0.877986
GRIPAP1	0.132769	0.0650429	0.263	0.188	1	GRIPAP1	0.876904
PIGX	0.133169	0.0936438	0.226	0.152	1	PIGX	0.875596
MTERF4	0.13334	0.153762	0.526	0.457	1	MTERF4	0.87504
PLGRKT	0.133486	0.133105	0.338	0.261	1	PLGRKT	0.874564
LIMS1	0.133501	-0.13942	0.549	0.623	1	LIMS1	0.874515
EMP3	0.133587	0.0961417	0.955	0.942	1	EMP3	0.874235
EIF1AD	0.133643	-0.0641014	0.053	0.101	1	EIF1AD	0.874055
ALG6	0.133643	-0.0709495	0.053	0.101	1	ALG6	0.874055
FBH1	0.133673	0.187848	0.278	0.21	1	FBH1	0.873957
COP1	0.133785	0.0776302	0.158	0.094	1	COP1	0.873592
ECD	0.134297	-0.0716757	0.068	0.123	1	ECD	0.871934
ATOX1	0.134303	0.0874257	0.368	0.275	1	ATOX1	0.871914
FHL3	0.134313	-0.0998949	0.113	0.174	1	FHL3	0.871881
PSMB1	0.134403	0.0786905	0.895	0.848	1	PSMB1	0.871591
NUDT16	0.134511	-0.0443918	0.053	0.101	1	NUDT16	0.871242
ACTR3	0.134568	0.124359	0.857	0.877	1	ACTR3	0.871059
METTL21A	0.134817	-0.0884325	0.075	0.13	1	METTL21A	0.870255
TRNAU1AP	0.135436	-0.144723	0.195	0.261	1	TRNAU1AP	0.868265
AIP	0.135533	-0.10814	0.564	0.652	1	AIP	0.867956
NME6	0.135603	-0.0937849	0.135	0.203	1	NME6	0.867731
UTP11	0.135625	-0.126183	0.143	0.21	1	UTP11	0.867662
ELMOD3	0.135639	-0.101025	0.113	0.174	1	ELMOD3	0.867614
EFR3A	0.135731	0.121379	0.346	0.254	1	EFR3A	0.867321
EPS8L2	0.135813	-0.0968381	0.06	0.109	1	EPS8L2	0.867058
DUSP23	0.136053	-0.140696	0.18	0.239	1	DUSP23	0.866292
RRP8	0.136057	-0.0899839	0.12	0.188	1	RRP8	0.866279
MUS81	0.136142	0.0715734	0.165	0.101	1	MUS81	0.866009
MRPL27	0.136177	0.122008	0.376	0.283	1	MRPL27	0.865895
MUT	0.136212	-0.0991773	0.083	0.138	1	MUT	0.865785
RANBP6	0.136324	-0.0947101	0.12	0.181	1	RANBP6	0.865426
SHLD1	0.136324	-0.111795	0.12	0.181	1	SHLD1	0.865426
TMA7	0.136415	-0.0990171	0.94	0.949	1	TMA7	0.865138
ATF1	0.136595	-0.100672	0.128	0.196	1	ATF1	0.864565
ENTR1	0.136962	-0.0945506	0.083	0.138	1	ENTR1	0.863401
RYK	0.137129	-0.0845234	0.075	0.13	1	RYK	0.862871
VPS37B	0.137143	-0.0715798	0.053	0.101	1	VPS37B	0.862826
LSM4	0.137227	0.13892	0.406	0.312	1	LSM4	0.86256
CD37	0.137322	-0.142028	0.865	0.891	1	CD37	0.862261
SNX17	0.137356	0.0893321	0.459	0.362	1	SNX17	0.862151
EXOSC8	0.137395	-0.100594	0.233	0.319	1	EXOSC8	0.862028
SHISAL2A	0.137423	0.0869612	0.143	0.087	1	SHISAL2A	0.861942
REC8	0.137497	0.129	0.135	0.08	1	REC8	0.861706
ATF6B	0.137501	-0.0838705	0.263	0.362	1	ATF6B	0.861693
SMC6	0.137619	0.0957686	0.323	0.246	1	SMC6	0.861322
STK16	0.137648	-0.100654	0.113	0.174	1	STK16	0.861231
TOR2A	0.137973	0.104566	0.113	0.065	1	TOR2A	0.860207
SSBP2	0.138029	-0.0554674	0.053	0.101	1	SSBP2	0.860029
NIPAL3	0.138374	-0.142424	0.233	0.304	1	NIPAL3	0.858946
C12orf65	0.138394	0.115061	0.338	0.254	1	C12orf65	0.858881
MYO1C	0.138482	0.0388358	0.15	0.087	1	MYO1C	0.858606
TAF1B	0.138514	0.114142	0.195	0.13	1	TAF1B	0.858506
CDC16	0.138687	-0.0737208	0.075	0.13	1	CDC16	0.857964
NUDT4	0.138722	-0.0822668	0.105	0.174	1	NUDT4	0.857855
IL18R1	0.13884	0.130044	0.241	0.174	1	IL18R1	0.857486
PDCL	0.139021	-0.114548	0.256	0.326	1	PDCL	0.85692
ALKBH5	0.139025	0.117755	0.338	0.261	1	ALKBH5	0.856906
IFT20	0.13917	-0.0805173	0.188	0.261	1	IFT20	0.856454
MEMO1	0.139231	-0.125266	0.083	0.138	1	MEMO1	0.856265
ZNHIT3	0.139392	0.102487	0.398	0.319	1	ZNHIT3	0.855764
GPR137	0.139407	0.104923	0.105	0.058	1	GPR137	0.855717
EIF2AK1	0.139697	0.0920456	0.353	0.261	1	EIF2AK1	0.854814
BTBD7	0.139785	-0.108166	0.158	0.225	1	BTBD7	0.85454
SENP2	0.139815	-0.0791614	0.053	0.101	1	SENP2	0.854447
TRAPPC6A	0.139857	0.123711	0.511	0.435	1	TRAPPC6A	0.854317
UBAP2L	0.140097	0.0880055	0.173	0.109	1	UBAP2L	0.853572
SSH2	0.140142	0.0712694	0.256	0.181	1	SSH2	0.85343
MAP2K4	0.140259	-0.0750615	0.075	0.13	1	MAP2K4	0.85307
SMARCD1	0.140324	-0.128817	0.143	0.203	1	SMARCD1	0.852869
MPRIP	0.140381	-0.11635	0.361	0.428	1	MPRIP	0.852692
DYNC1LI2	0.140676	0.0891617	0.263	0.181	1	DYNC1LI2	0.85178
COMMD7	0.140819	0.138437	0.504	0.42	1	COMMD7	0.851339
PRMT2	0.140942	-0.130955	0.534	0.638	1	PRMT2	0.850961
XPO6	0.141227	-0.11593	0.135	0.196	1	XPO6	0.850081
CDK6	0.141283	-0.0752941	0.135	0.203	1	CDK6	0.849911
TSC22D3	0.141319	0.108854	0.323	0.239	1	TSC22D3	0.849799
DNAJC13	0.141399	-0.135069	0.105	0.159	1	DNAJC13	0.849553
VPS51	0.141476	0.141759	0.564	0.493	1	VPS51	0.849317
TRIM21	0.141488	0.0966714	0.165	0.109	1	TRIM21	0.849282
AKAP13	0.141491	0.0973228	0.722	0.638	1	AKAP13	0.849273
CLP1	0.141541	0.0660442	0.12	0.065	1	CLP1	0.849116
RPS17	0.141583	-0.108455	0.203	0.283	1	RPS17	0.84899
LFNG	0.141782	0.147881	0.353	0.268	1	LFNG	0.84838
FIS1	0.142145	0.113403	0.677	0.543	1	FIS1	0.84727
IFT80	0.142368	-0.080782	0.068	0.123	1	IFT80	0.846587
RCOR1	0.142373	-0.149304	0.098	0.152	1	RCOR1	0.846571
SETX	0.142483	-0.108984	0.414	0.493	1	SETX	0.846237
TMEM154	0.142536	-0.112775	0.256	0.333	1	TMEM154	0.846075
FLAD1	0.142589	0.0649023	0.128	0.072	1	FLAD1	0.845913
KIAA2013	0.142766	-0.104065	0.15	0.217	1	KIAA2013	0.845377
GPR174	0.142947	0.0691295	0.316	0.232	1	GPR174	0.844826
CTDP1	0.14308	0.0970109	0.143	0.087	1	CTDP1	0.844422
BANF1	0.143359	-0.0734123	0.331	0.42	1	BANF1	0.843575
AC005332.5	0.143439	-0.0489477	0.053	0.101	1	AC005332.5	0.843333
LMOD3	0.143443	-0.0544562	0.075	0.13	1	LMOD3	0.84332
DHX36	0.143541	-0.163758	0.436	0.522	1	DHX36	0.843023
RNF5	0.143578	0.132404	0.241	0.174	1	RNF5	0.842912
ZNF226	0.143711	-0.175779	0.165	0.225	1	ZNF226	0.84251
CDC27	0.143769	0.110154	0.241	0.167	1	CDC27	0.842334
SP1	0.143917	0.0967228	0.113	0.065	1	SP1	0.841889
MRPS2	0.143952	-0.0947282	0.113	0.181	1	MRPS2	0.841783
MSH6	0.144212	-0.109439	0.09	0.152	1	MSH6	0.840998
PPT1	0.144253	0.11315	0.331	0.254	1	PPT1	0.840874
RAD23A	0.144498	0.0987545	0.496	0.428	1	RAD23A	0.840139
OXCT1	0.144508	0.13086	0.173	0.116	1	OXCT1	0.840109
HSH2D	0.144508	-0.0822261	0.113	0.174	1	HSH2D	0.840109
ZBTB7B	0.144538	0.102279	0.248	0.174	1	ZBTB7B	0.840018
GCNT4	0.144585	-0.133756	0.098	0.152	1	GCNT4	0.839876
IGFLR1	0.144637	-0.0899107	0.083	0.138	1	IGFLR1	0.83972
PAFAH1B3	0.144654	0.0632012	0.278	0.196	1	PAFAH1B3	0.839669
BCL7B	0.144782	0.100726	0.241	0.174	1	BCL7B	0.839287
COX20	0.144793	0.118748	0.398	0.319	1	COX20	0.839253
ISG15	0.144828	0.121315	0.812	0.783	1	ISG15	0.839147
ZMAT5	0.144991	-0.118663	0.113	0.167	1	ZMAT5	0.838658
DCAF5	0.145036	-0.105265	0.12	0.181	1	DCAF5	0.838523
AEBP2	0.145061	-0.113482	0.128	0.196	1	AEBP2	0.83845
CCDC22	0.145208	-0.0482158	0.113	0.174	1	CCDC22	0.83801
TAPT1	0.146031	-0.0640224	0.113	0.181	1	TAPT1	0.835554
KIAA0040	0.146079	0.154243	0.444	0.377	1	KIAA0040	0.835413
UIMC1	0.146154	-0.087155	0.135	0.203	1	UIMC1	0.83519
CSKMT	0.146204	-0.0623554	0.053	0.101	1	CSKMT	0.835041
XPO1	0.146304	0.130946	0.368	0.283	1	XPO1	0.834743
MRPL3	0.146304	-0.0779701	0.278	0.37	1	MRPL3	0.834743
QKI	0.146401	0.109427	0.278	0.203	1	QKI	0.834457
PDZD11	0.146618	0.105395	0.271	0.196	1	PDZD11	0.833812
ARFIP2	0.14695	0.0886296	0.143	0.087	1	ARFIP2	0.832832
43896	0.146977	-0.1179	0.278	0.348	1	43896	0.832752
FGFR1OP2	0.147186	-0.142214	0.526	0.594	1	FGFR1OP2	0.832134
MITD1	0.147465	-0.129082	0.256	0.326	1	MITD1	0.831312
UBE2K	0.147481	0.0501209	0.444	0.362	1	UBE2K	0.831265
ZSCAN16-AS1	0.147725	0.0707321	0.135	0.08	1	ZSCAN16-AS1	0.830546
RPL7	0.148033	-0.0583038	1	0.993	1	RPL7	0.829641
TTPAL	0.148035	-0.11739	0.113	0.174	1	TTPAL	0.829637
ZC3H4	0.14833	-0.150396	0.098	0.152	1	ZC3H4	0.828771
LGALS3BP	0.148498	0.132697	0.18	0.123	1	LGALS3BP	0.828278
MMP25-AS1	0.148498	-0.0665585	0.12	0.181	1	MMP25-AS1	0.828278
TIGAR	0.148765	-0.0742827	0.09	0.152	1	TIGAR	0.827499
CCDC47	0.1488	-0.119617	0.226	0.29	1	CCDC47	0.827396
NME3	0.148911	0.0380125	0.617	0.486	1	NME3	0.827072
DYNC1LI1	0.148947	0.141515	0.301	0.232	1	DYNC1LI1	0.826968
RYBP	0.148963	-0.106364	0.195	0.268	1	RYBP	0.82692
OGA	0.149105	0.0636453	0.361	0.261	1	OGA	0.826508
MRPL37	0.149349	0.0720934	0.135	0.08	1	MRPL37	0.825797
STAT5A	0.149577	-0.0907895	0.143	0.21	1	STAT5A	0.825135
DNTTIP2	0.149671	-0.0768267	0.346	0.428	1	DNTTIP2	0.824861
SLC35D2	0.149841	0.0269943	0.398	0.319	1	SLC35D2	0.824369
SS18	0.149847	0.0703117	0.286	0.203	1	SS18	0.824352
MBNL2	0.150046	0.0586699	0.128	0.072	1	MBNL2	0.823775
MVP	0.150057	0.0865869	0.496	0.399	1	MVP	0.823743
EAPP	0.150298	-0.11439	0.391	0.5	1	EAPP	0.823046
DNAJC24	0.150501	0.0723122	0.143	0.087	1	DNAJC24	0.822462
PSMD4	0.150909	-0.116259	0.406	0.478	1	PSMD4	0.821286
C1RL-AS1	0.150987	0.0754243	0.135	0.08	1	C1RL-AS1	0.821061
YARS2	0.151056	0.0727796	0.211	0.138	1	YARS2	0.820863
CD226	0.151223	-0.142877	0.226	0.312	1	CD226	0.820382
PRMT1	0.151369	0.130942	0.466	0.406	1	PRMT1	0.819963
NAT9	0.151413	-0.0948981	0.068	0.116	1	NAT9	0.819837
A1BG	0.151627	-0.0798411	0.113	0.174	1	A1BG	0.819224
ERN1	0.151629	0.0600615	0.165	0.101	1	ERN1	0.819218
ZSCAN16	0.152296	-0.0846923	0.068	0.116	1	ZSCAN16	0.817313
DHRS4-AS1	0.15254	-0.0771921	0.06	0.109	1	DHRS4-AS1	0.816617
HINT1	0.152648	0.113012	0.977	0.986	1	HINT1	0.816307
C19orf48	0.153025	0.0780462	0.128	0.072	1	C19orf48	0.815237
SPEN	0.153102	0.131232	0.421	0.333	1	SPEN	0.815019
REXO4	0.153927	0.119587	0.233	0.167	1	REXO4	0.812686
TATDN1	0.154	-0.0903738	0.18	0.246	1	TATDN1	0.81248
EMSY	0.154176	-0.0623192	0.075	0.13	1	EMSY	0.811982
PFDN2	0.154178	0.124535	0.556	0.507	1	PFDN2	0.811978
RNF41	0.154233	-0.0635559	0.098	0.159	1	RNF41	0.811823
KARS	0.154325	-0.173864	0.233	0.29	1	KARS	0.811564
ICAM2	0.154462	0.1658	0.444	0.377	1	ICAM2	0.811179
THUMPD1	0.154593	0.137174	0.376	0.297	1	THUMPD1	0.81081
PAXIP1-AS2	0.154629	-0.0794343	0.09	0.145	1	PAXIP1-AS2	0.810709
SBDS	0.154766	-0.167778	0.301	0.391	1	SBDS	0.810324
DBT	0.155318	-0.0813523	0.06	0.109	1	DBT	0.808778
ODR4	0.155611	-0.0510621	0.12	0.181	1	ODR4	0.807959
FYN	0.155931	-0.145343	0.624	0.688	1	FYN	0.807066
RIN3	0.156025	0.102013	0.173	0.116	1	RIN3	0.806807
BPNT1	0.156253	-0.0656826	0.06	0.109	1	BPNT1	0.806173
MORF4L1	0.156297	-0.0806062	0.789	0.841	1	MORF4L1	0.806051
NKAP	0.156358	0.0710411	0.286	0.203	1	NKAP	0.805879
SCAI	0.156554	0.0753032	0.158	0.101	1	SCAI	0.805336
ZNF33A	0.156605	0.0752682	0.241	0.174	1	ZNF33A	0.805194
AGA	0.156763	0.130711	0.135	0.087	1	AGA	0.804757
SUCO	0.156828	-0.100126	0.098	0.152	1	SUCO	0.804576
AK6	0.157247	0.119929	0.241	0.174	1	AK6	0.803417
HSP90AB1	0.157497	-0.127739	0.774	0.884	1	HSP90AB1	0.802726
CCNQ	0.15754	0.0936806	0.301	0.225	1	CCNQ	0.802609
COX18	0.157673	-0.0933302	0.053	0.101	1	COX18	0.802242
ZNF506	0.157749	-0.111233	0.128	0.188	1	ZNF506	0.802032
THAP5	0.158196	-0.106387	0.158	0.225	1	THAP5	0.800806
C1QBP	0.158482	-0.146736	0.496	0.565	1	C1QBP	0.800021
RABGAP1	0.158625	0.0640883	0.143	0.087	1	RABGAP1	0.799629
KPNA2	0.158824	-0.105613	0.135	0.196	1	KPNA2	0.799083
CERS2	0.158886	0.12422	0.353	0.275	1	CERS2	0.798916
SKAP2	0.159135	-0.0894404	0.256	0.326	1	SKAP2	0.798234
REEP5	0.159453	0.131583	0.805	0.768	1	REEP5	0.797367
ATP13A3	0.159647	-0.122149	0.293	0.37	1	ATP13A3	0.796839
TSEN54	0.159698	-0.127887	0.113	0.167	1	TSEN54	0.796702
SMARCC1	0.159845	-0.0429777	0.323	0.413	1	SMARCC1	0.796301
PSMD5	0.160034	-0.0659102	0.06	0.109	1	PSMD5	0.795787
C5orf15	0.160203	-0.0572124	0.075	0.13	1	C5orf15	0.795329
QRICH1	0.160416	-0.104449	0.068	0.116	1	QRICH1	0.794753
UBE2J2	0.160624	-0.0560183	0.233	0.319	1	UBE2J2	0.794189
GCLM	0.161015	0.10973	0.195	0.13	1	GCLM	0.793134
NCOA4	0.161146	0.111961	0.338	0.246	1	NCOA4	0.792779
VPS50	0.161276	0.0918116	0.158	0.101	1	VPS50	0.79243
DNAJB1	0.161411	-0.077907	0.173	0.246	1	DNAJB1	0.792068
FBXO33	0.1618	-0.076826	0.068	0.116	1	FBXO33	0.791021
EIF4A2	0.162303	-0.0811446	0.827	0.855	1	EIF4A2	0.789674
JKAMP	0.162608	0.0931144	0.203	0.138	1	JKAMP	0.788859
EEF1AKMT2	0.162679	-0.0628523	0.083	0.138	1	EEF1AKMT2	0.788669
PARP1	0.162685	-0.0820022	0.692	0.775	1	PARP1	0.788653
KIAA1143	0.162802	0.109065	0.173	0.116	1	KIAA1143	0.78834
ZDHHC4	0.162803	-0.0797459	0.09	0.145	1	ZDHHC4	0.788336
CHM	0.162809	0.06282	0.143	0.087	1	CHM	0.788321
CCZ1	0.162824	0.129233	0.353	0.275	1	CCZ1	0.788281
TMEM218	0.162874	0.085687	0.158	0.101	1	TMEM218	0.788149
ALKBH7	0.162915	-0.117974	0.398	0.471	1	ALKBH7	0.78804
MSRB1	0.16298	0.0837189	0.18	0.123	1	MSRB1	0.787866
RASSF3	0.163383	0.148645	0.308	0.239	1	RASSF3	0.786794
EEFSEC	0.163399	-0.0600586	0.06	0.109	1	EEFSEC	0.786752
MRPL11	0.163411	-0.119635	0.308	0.384	1	MRPL11	0.786718
TMEM208	0.163431	0.0955907	0.474	0.399	1	TMEM208	0.786664
DNAJB2	0.163639	-0.0822551	0.09	0.145	1	DNAJB2	0.786114
SCYL2	0.163652	0.0563053	0.105	0.058	1	SCYL2	0.786078
FASTK	0.163681	0.120304	0.203	0.138	1	FASTK	0.786002
PFKL	0.16376	-0.12179	0.256	0.326	1	PFKL	0.785791
RFTN1	0.164121	-0.101465	0.263	0.341	1	RFTN1	0.784837
MMD	0.164173	0.10218	0.12	0.072	1	MMD	0.784699
TMEM43	0.164338	-0.069953	0.113	0.174	1	TMEM43	0.784262
ACTR10	0.164413	0.0820475	0.301	0.217	1	ACTR10	0.784065
DNAJB6	0.1645	-0.0817379	0.534	0.63	1	DNAJB6	0.783835
ARIH2	0.164578	0.119114	0.263	0.188	1	ARIH2	0.783628
RNF13	0.16458	-0.117937	0.233	0.312	1	RNF13	0.783624
USF2	0.164662	-0.147838	0.451	0.529	1	USF2	0.783407
STIM2	0.164719	-0.094408	0.218	0.297	1	STIM2	0.783257
GATAD2A	0.164894	-0.1073	0.18	0.246	1	GATAD2A	0.782795
DGLUCY	0.164981	0.129933	0.286	0.225	1	DGLUCY	0.782565
S100A10	0.165021	0.0553297	0.97	0.986	1	S100A10	0.782461
PREP	0.165641	0.0670864	0.105	0.058	1	PREP	0.780831
FOXP3	0.165759	0.0947509	0.669	0.587	1	FOXP3	0.780524
FAHD1	0.165835	-0.0564472	0.06	0.109	1	FAHD1	0.780323
MED31	0.165964	-0.0921156	0.143	0.203	1	MED31	0.779987
FXYD1	0.166163	-0.084389	0.09	0.145	1	FXYD1	0.779466
SFSWAP	0.166165	-0.0875821	0.256	0.341	1	SFSWAP	0.77946
HINFP	0.166303	-0.0820395	0.075	0.123	1	HINFP	0.779099
NR3C1	0.166406	-0.20081	0.263	0.319	1	NR3C1	0.77883
LYL1	0.166644	0.0837036	0.218	0.152	1	LYL1	0.77821
BPTF	0.167107	0.121183	0.624	0.514	1	BPTF	0.777005
TRNT1	0.167212	0.12722	0.218	0.159	1	TRNT1	0.776733
RPL23	0.16739	-0.0712887	0.955	0.986	1	RPL23	0.776271
GNL2	0.167721	0.0808685	0.18	0.116	1	GNL2	0.775414
GMPR2	0.167763	-0.105972	0.226	0.304	1	GMPR2	0.775303
APBA3	0.167862	0.117439	0.143	0.094	1	APBA3	0.775047
MYL12A	0.167873	0.055569	0.992	0.993	1	MYL12A	0.77502
ATP5PB	0.1681	-0.163813	0.526	0.572	1	ATP5PB	0.774431
LTV1	0.168129	-0.0926897	0.143	0.203	1	LTV1	0.774356
MAPRE1	0.168153	0.0857818	0.368	0.283	1	MAPRE1	0.774297
CCNY	0.168166	0.0771171	0.211	0.145	1	CCNY	0.774262
AEN	0.168207	0.0735796	0.113	0.065	1	AEN	0.774157
RAB5B	0.168223	-0.076367	0.135	0.196	1	RAB5B	0.774116
ITK	0.168401	-0.102469	0.398	0.471	1	ITK	0.773654
EXOSC7	0.168412	-0.0793235	0.158	0.225	1	EXOSC7	0.773628
ATP5MPL	0.168483	-0.111332	0.586	0.652	1	ATP5MPL	0.773445
TMEM204	0.168696	0.132292	0.241	0.181	1	TMEM204	0.772895
CTBP1-DT	0.168794	-0.0571927	0.06	0.109	1	CTBP1-DT	0.772642
PFDN1	0.168815	0.0806928	0.338	0.254	1	PFDN1	0.77259
TSG101	0.168918	0.0927933	0.391	0.319	1	TSG101	0.772323
EHMT1	0.169048	-0.0805768	0.218	0.297	1	EHMT1	0.77199
NUP88	0.169242	-0.100574	0.09	0.138	1	NUP88	0.771493
SETD2	0.169532	-0.143268	0.301	0.37	1	SETD2	0.770748
USP34	0.16957	-0.0863021	0.376	0.471	1	USP34	0.770652
SELENOW	0.169789	-0.0931511	0.481	0.551	1	SELENOW	0.77009
WDTC1	0.16979	-0.0404965	0.06	0.109	1	WDTC1	0.770089
OAZ2	0.169918	-0.121508	0.128	0.181	1	OAZ2	0.769762
P2RY10	0.170086	0.126709	0.451	0.377	1	P2RY10	0.769332
CDK9	0.170185	-0.0529929	0.15	0.217	1	CDK9	0.769078
MIEF1	0.170621	0.0919013	0.15	0.094	1	MIEF1	0.767967
PHKG1	0.170707	0.092351	0.12	0.072	1	PHKG1	0.767748
UBA52	0.170759	-0.0807404	0.992	1	1	UBA52	0.767617
DAZAP2	0.170942	-0.112315	0.632	0.674	1	DAZAP2	0.767151
EEF1B2	0.171	-0.0829336	0.97	1	1	EEF1B2	0.767003
DENND6B	0.171218	0.0756954	0.226	0.159	1	DENND6B	0.766451
ZNF766	0.171406	-0.105369	0.173	0.246	1	ZNF766	0.765974
MRFAP1	0.171656	0.109294	0.594	0.514	1	MRFAP1	0.765341
NDUFA4	0.171706	0.051004	0.955	0.949	1	NDUFA4	0.765216
ZMYM2	0.171899	-0.111437	0.241	0.304	1	ZMYM2	0.764726
EXOC6	0.172166	0.109451	0.18	0.123	1	EXOC6	0.764053
MIR4435-2HG	0.172644	0.117826	0.549	0.471	1	MIR4435-2HG	0.762848
AL357060.1	0.172801	-0.0208751	0.06	0.109	1	AL357060.1	0.762453
MGAT4A	0.173062	-0.102556	0.113	0.167	1	MGAT4A	0.761798
TMEM14A	0.173606	0.037408	0.248	0.167	1	TMEM14A	0.760435
43898	0.173613	0.0724302	0.113	0.065	1	43898	0.760417
LRRFIP1	0.173834	-0.111708	0.669	0.717	1	LRRFIP1	0.759866
EIF2D	0.173912	0.114289	0.143	0.094	1	EIF2D	0.75967
RPS27	0.173927	-0.0580787	1	1	1	RPS27	0.759632
TM2D2	0.17395	-0.122715	0.158	0.217	1	TM2D2	0.759575
SUMO1	0.174379	-0.0903458	0.692	0.79	1	SUMO1	0.758505
TBCB	0.174396	-0.151906	0.474	0.514	1	TBCB	0.758462
RPS19BP1	0.174522	0.0906127	0.564	0.5	1	RPS19BP1	0.758149
PDLIM5	0.17467	-0.0582737	0.068	0.116	1	PDLIM5	0.757781
REST	0.174725	0.151322	0.459	0.37	1	REST	0.757644
DDT	0.174732	-0.127107	0.526	0.58	1	DDT	0.757629
LSR	0.174753	0.124041	0.203	0.145	1	LSR	0.757576
DYNC1H1	0.174979	0.132384	0.586	0.514	1	DYNC1H1	0.757013
KIDINS220	0.17498	0.0974276	0.248	0.181	1	KIDINS220	0.757012
AIDA	0.175038	-0.095796	0.308	0.362	1	AIDA	0.756867
HLA-DRB1	0.175146	0.105617	0.872	0.862	1	HLA-DRB1	0.756601
RPSA	0.175158	0.0470711	1	0.993	1	RPSA	0.75657
DBP	0.175168	-0.102037	0.233	0.319	1	DBP	0.756545
YTHDF2	0.175177	0.136977	0.429	0.362	1	YTHDF2	0.756523
GNPTG	0.175313	0.0946979	0.18	0.123	1	GNPTG	0.756187
GPAT4	0.175626	-0.0757948	0.075	0.123	1	GPAT4	0.755412
LRRC75A	0.175626	-0.0890091	0.075	0.123	1	LRRC75A	0.755412
PSME3	0.175653	-0.0761351	0.068	0.116	1	PSME3	0.755343
INIP	0.17567	-0.0699489	0.09	0.145	1	INIP	0.755301
ESD	0.175809	-0.0610384	0.263	0.355	1	ESD	0.754959
FAM160B1	0.175862	-0.14604	0.218	0.268	1	FAM160B1	0.754828
RAD21	0.176218	0.080448	0.647	0.551	1	RAD21	0.75395
EIF2B4	0.176554	-0.0695633	0.09	0.145	1	EIF2B4	0.753121
DDX51	0.176579	-0.0731286	0.075	0.123	1	DDX51	0.753062
CHMP3	0.176665	0.133609	0.286	0.217	1	CHMP3	0.75285
PBX2	0.176938	0.0638274	0.158	0.101	1	PBX2	0.752178
NUFIP2	0.177115	-0.108589	0.323	0.391	1	NUFIP2	0.751744
UQCRFS1	0.177127	0.0722058	0.617	0.543	1	UQCRFS1	0.751715
NR1H2	0.177241	-0.0912454	0.241	0.326	1	NR1H2	0.751436
PCED1B	0.17729	0.125264	0.414	0.348	1	PCED1B	0.751315
CCT3	0.177319	0.131243	0.669	0.594	1	CCT3	0.751245
PIK3C2A	0.177661	0.0424984	0.143	0.087	1	PIK3C2A	0.750409
C1D	0.177874	-0.172852	0.323	0.377	1	C1D	0.749887
UBXN4	0.177942	-0.056848	0.699	0.754	1	UBXN4	0.749721
[truncated: 4,427 more rows]

## Sheet: S2E-C4 Bispecific vs. PD-L1
Table S2E: Differential Expression Analysis CD4 Tregs cluster 4 Bispecific vs. PD-L1
[truncated: 5,647 more rows]

[truncated: 5 more sheets: S2F-C7-8 PD-1 vs. IgG, S2G-C7-8 PD-L1 vs. IgG, S2H-C7-8 Bispecific vs. IgG, S2I-C7-8 Bispecific vs. PD1, S2J-C7-8 Bispecific vs. PDL1]
