# Supplementary material for: Enhanced Efficacy of Simultaneous PD-1 and PD-L1 Immune Checkpoint Blockade in High-Grade Serous Ovarian Cancer
Source: Oxford University Press journal article supplement (doi:10.1158/0008-5472.can-20-1674), 2020-11-06
Supplement: 00085472can201674-sup-243610_2_supp_6692632_qj3dcj.xlsx [file 00085472can201674-sup-243610_2_supp_6692632_qj3dcj.xlsx]

## Sheet: S3A-PD1+ IgG vs. PD1
Table S3A: Differential Analysis of CD4+PD1+FOXP3- T cells IgG vs. PD-1
	p_val	avg_logFC	pct.1	pct.2	p_val_adj	Gene_ID	logP
DPH7	0.00030692	0.233201	0.203	0.06	1	DPH7	3.51298
NPEPPS	0.000331781	0.30179	0.378	0.187	1	NPEPPS	3.47915
CROT	0.000510819	0.17456	0.154	0.033	1	CROT	3.29173
ANKRD12	0.000511985	-0.206869	0.937	0.953	1	ANKRD12	3.29074
SRGN	0.000517775	0.265035	0.993	0.96	1	SRGN	3.28586
POU2F2	0.000604553	0.309767	0.336	0.16	1	POU2F2	3.21857
BCAS3	0.000747046	0.291174	0.252	0.1	1	BCAS3	3.12665
GALNT2	0.000810439	0.216709	0.189	0.06	1	GALNT2	3.09128
C2orf49	0.00089069	0.225253	0.273	0.12	1	C2orf49	3.05027
GTF2H3	0.00103099	0.188255	0.252	0.1	1	GTF2H3	2.98675
DUSP6	0.00117463	-0.296402	0.063	0.187	1	DUSP6	2.9301
TARS	0.0014899	0.188632	0.294	0.133	1	TARS	2.82684
KDM5C	0.00167768	0.162554	0.252	0.1	1	KDM5C	2.77529
ITGB1	0.00200527	-0.317664	0.573	0.707	1	ITGB1	2.69783
ZC2HC1A	0.00203522	0.110479	0.217	0.08	1	ZC2HC1A	2.69139
TPI1	0.00213824	0.230262	0.79	0.713	1	TPI1	2.66994
ADH5	0.00214742	0.236768	0.573	0.38	1	ADH5	2.66808
TRIB1	0.00239907	0.191512	0.14	0.04	1	TRIB1	2.61996
OGT	0.00262772	-0.261521	0.343	0.507	1	OGT	2.58042
C15orf53	0.00285981	-0.280994	0.084	0.2	1	C15orf53	2.54366
CXCR4	0.00291722	0.246454	0.839	0.693	1	CXCR4	2.53503
BTG1	0.0029784	-0.213526	0.965	0.987	1	BTG1	2.52602
USP11	0.0030097	0.176132	0.126	0.033	1	USP11	2.52148
IPO5	0.00304753	0.146264	0.189	0.067	1	IPO5	2.51605
UPF3B	0.0031712	0.205172	0.287	0.14	1	UPF3B	2.49878
CTBP1	0.00324723	0.168989	0.252	0.113	1	CTBP1	2.48849
LGALS9	0.00330227	0.18403	0.336	0.173	1	LGALS9	2.48119
SUDS3	0.00331803	0.189236	0.322	0.173	1	SUDS3	2.47912
BRAP	0.00343756	0.122674	0.154	0.047	1	BRAP	2.46375
UBE2D1	0.00366337	0.172633	0.175	0.067	1	UBE2D1	2.43612
ATP6V1E1	0.0038509	0.204715	0.35	0.187	1	ATP6V1E1	2.41444
ATP6V0E1	0.00389365	0.166015	0.958	0.84	1	ATP6V0E1	2.40964
SOD1	0.00393657	0.194077	0.93	0.867	1	SOD1	2.40488
DCAF7	0.00443772	0.157694	0.392	0.213	1	DCAF7	2.35284
ZNF626	0.00464942	0.171303	0.119	0.033	1	ZNF626	2.3326
COL9A2	0.00476445	0.155836	0.154	0.053	1	COL9A2	2.32199
HIF1A	0.0047678	0.275225	0.573	0.44	1	HIF1A	2.32168
PIK3CD	0.0049823	-0.249142	0.203	0.347	1	PIK3CD	2.30257
FBXO9	0.00530895	0.187287	0.273	0.133	1	FBXO9	2.27499
OGFOD1	0.00531644	0.139268	0.182	0.073	1	OGFOD1	2.27438
UBE2Z	0.00550241	0.256735	0.336	0.193	1	UBE2Z	2.25945
RMC1	0.00550277	0.130947	0.119	0.033	1	RMC1	2.25942
FOXK2	0.00551583	0.173265	0.182	0.073	1	FOXK2	2.25839
COPS4	0.00559191	0.192867	0.266	0.133	1	COPS4	2.25244
LBH	0.00565178	-0.236095	0.531	0.66	1	LBH	2.24781
CHD3	0.0056686	0.15575	0.503	0.307	1	CHD3	2.24652
HDAC3	0.00574484	0.196628	0.294	0.16	1	HDAC3	2.24072
NUBP2	0.00602163	0.200947	0.35	0.2	1	NUBP2	2.22029
IL21R	0.00616641	0.189848	0.245	0.12	1	IL21R	2.20997
43892	0.00622672	0.210377	0.294	0.16	1	43892	2.20574
BTLA	0.00623002	0.235323	0.287	0.153	1	BTLA	2.20551
SLC33A1	0.00633092	-0.204085	0.049	0.14	1	SLC33A1	2.19853
DNASE2	0.00641629	0.170791	0.301	0.16	1	DNASE2	2.19272
PUS3	0.00654832	0.129078	0.14	0.047	1	PUS3	2.18387
C1QBP	0.00670686	0.199876	0.601	0.42	1	C1QBP	2.17348
LIG1	0.00686508	0.114916	0.105	0.027	1	LIG1	2.16335
APBA3	0.00692597	-0.180039	0.049	0.14	1	APBA3	2.15952
NCOA7	0.00697511	0.212996	0.392	0.24	1	NCOA7	2.15645
C12orf10	0.00698138	0.21074	0.35	0.213	1	C12orf10	2.15606
DCTN6	0.00707549	0.233517	0.273	0.147	1	DCTN6	2.15024
43899	0.00737564	0.181384	0.147	0.053	1	43899	2.1322
ASAP1	0.0075362	0.20249	0.308	0.173	1	ASAP1	2.12285
NUMB	0.00757286	0.170019	0.28	0.147	1	NUMB	2.12074
FAM78A	0.00763233	-0.235599	0.133	0.24	1	FAM78A	2.11734
FLYWCH1	0.00784896	0.109053	0.14	0.047	1	FLYWCH1	2.10519
ZNF557	0.00785884	0.127313	0.105	0.027	1	ZNF557	2.10464
SAP30L	0.0078632	0.141306	0.189	0.08	1	SAP30L	2.1044
RASSF5	0.00797406	-0.220731	0.378	0.533	1	RASSF5	2.09832
CAST	0.00835675	0.230238	0.65	0.553	1	CAST	2.07796
PJA2	0.00845649	0.195441	0.559	0.413	1	PJA2	2.07281
AC245297.3	0.00872447	0.195461	0.476	0.307	1	AC245297.3	2.05926
PIP5K1C	0.00914513	0.128118	0.112	0.033	1	PIP5K1C	2.03881
CASD1	0.00915706	-0.191417	0.112	0.22	1	CASD1	2.03824
RPF1	0.00919936	-0.182619	0.133	0.247	1	RPF1	2.03624
FCF1	0.0093101	0.10213	0.126	0.04	1	FCF1	2.03105
F8A1	0.00940958	0.178144	0.154	0.06	1	F8A1	2.02643
UBE2B	0.00950114	0.158971	0.811	0.613	1	UBE2B	2.02222
PPIL1	0.00950747	0.115679	0.168	0.067	1	PPIL1	2.02194
DBI	0.00951337	0.211418	0.839	0.707	1	DBI	2.02167
FAM122A	0.00960074	0.154553	0.161	0.067	1	FAM122A	2.0177
GNAI3	0.0097416	-0.207019	0.35	0.493	1	GNAI3	2.01137
COX5A	0.00974783	0.205527	0.734	0.627	1	COX5A	2.01109
CELF1	0.00982516	0.177023	0.364	0.22	1	CELF1	2.00766
WASF2	0.00984258	0.210252	0.566	0.407	1	WASF2	2.00689
PLRG1	0.0102775	0.185607	0.343	0.2	1	PLRG1	1.98811
KCTD7	0.0103249	0.161713	0.161	0.067	1	KCTD7	1.98612
IKBKE	0.0103249	0.143626	0.161	0.067	1	IKBKE	1.98612
GALM	0.0104514	0.199684	0.566	0.407	1	GALM	1.98082
PIGX	0.0105556	0.179439	0.245	0.127	1	PIGX	1.97652
ZC3HAV1	0.0106582	-0.204979	0.371	0.493	1	ZC3HAV1	1.97232
CDC123	0.0108558	0.193263	0.469	0.313	1	CDC123	1.96434
PPP2R1A	0.0109283	0.19859	0.273	0.153	1	PPP2R1A	1.96145
TIAM2	0.010974	0.168422	0.14	0.053	1	TIAM2	1.95963
HNRNPDL	0.0110284	0.229819	0.706	0.607	1	HNRNPDL	1.95749
RER1	0.0111613	0.176632	0.692	0.507	1	RER1	1.95229
MUM1	0.0112033	-0.197962	0.133	0.24	1	MUM1	1.95065
ZNF808	0.0116553	-0.154315	0.049	0.133	1	ZNF808	1.93348
MX1	0.011767	0.209896	0.308	0.173	1	MX1	1.92933
NSFL1C	0.011834	0.121559	0.252	0.127	1	NSFL1C	1.92687
COPS9	0.012034	0.174201	0.65	0.473	1	COPS9	1.91959
ZNF638	0.0123519	-0.304837	0.413	0.493	1	ZNF638	1.90827
PPIA	0.0123556	0.142374	0.958	0.933	1	PPIA	1.90813
ATP5MC2	0.0127302	0.139334	0.951	0.847	1	ATP5MC2	1.89516
LPCAT4	0.0127314	-0.149845	0.091	0.193	1	LPCAT4	1.89513
RAP2C	0.0127975	0.122233	0.182	0.08	1	RAP2C	1.89288
STMP1	0.0129427	0.209164	0.552	0.393	1	STMP1	1.88797
ATP5PF	0.0131062	0.168667	0.846	0.727	1	ATP5PF	1.88252
ICE1	0.0131877	0.182446	0.322	0.193	1	ICE1	1.87983
ARNTL	0.0133057	0.240438	0.238	0.133	1	ARNTL	1.87596
RPL15	0.0133084	0.105266	1	1	1	RPL15	1.87587
CCDC130	0.0133755	-0.206253	0.154	0.26	1	CCDC130	1.87369
IRF1	0.0133989	-0.262405	0.657	0.767	1	IRF1	1.87293
PTPN18	0.0137191	-0.210774	0.196	0.307	1	PTPN18	1.86268
DPYSL2	0.0138276	0.139703	0.161	0.067	1	DPYSL2	1.85925
TSPO	0.0139611	0.146935	0.832	0.78	1	TSPO	1.85508
SMAP2	0.014032	0.201375	0.664	0.52	1	SMAP2	1.85288
RNF216	0.0141479	0.148166	0.28	0.153	1	RNF216	1.84931
MRPL47	0.0141613	0.191015	0.427	0.293	1	MRPL47	1.8489
LARS	0.0142955	0.19791	0.448	0.287	1	LARS	1.8448
TRAF5	0.0144364	-0.229376	0.189	0.293	1	TRAF5	1.84054
SMAP1	0.0144921	0.181039	0.427	0.28	1	SMAP1	1.83887
SPOP	0.0144997	0.163625	0.371	0.227	1	SPOP	1.83864
RCC2	0.014505	0.181886	0.154	0.067	1	RCC2	1.83848
SORD	0.0146902	0.160953	0.126	0.047	1	SORD	1.83297
GHITM	0.0149614	0.202482	0.608	0.48	1	GHITM	1.82503
PRKCQ	0.0152264	0.0670952	0.315	0.173	1	PRKCQ	1.8174
DLST	0.0155275	-0.136737	0.056	0.14	1	DLST	1.8089
TMEM259	0.0155968	-0.127263	0.273	0.407	1	TMEM259	1.80696
TYW3	0.0159911	0.202923	0.28	0.167	1	TYW3	1.79612
HIVEP1	0.0159956	0.239936	0.217	0.113	1	HIVEP1	1.796
RNF125	0.0160535	-0.190255	0.21	0.32	1	RNF125	1.79443
GZMA	0.0160791	-0.454883	0.091	0.187	1	GZMA	1.79374
GIMAP7	0.0161272	-0.114511	0.909	0.967	1	GIMAP7	1.79244
ATP5MG	0.0161794	0.14405	0.93	0.873	1	ATP5MG	1.79104
FAM98B	0.0162333	-0.199511	0.14	0.247	1	FAM98B	1.78959
CD46	0.0165277	0.215163	0.524	0.36	1	CD46	1.78179
MBD6	0.0167785	0.118806	0.126	0.047	1	MBD6	1.77525
TTC39C	0.0168378	0.202393	0.524	0.38	1	TTC39C	1.77371
AGFG1	0.016856	0.205355	0.427	0.28	1	AGFG1	1.77325
ZNF714	0.0173061	0.136842	0.126	0.047	1	ZNF714	1.7618
FKBP1A	0.0173177	0.17128	0.629	0.493	1	FKBP1A	1.76151
DOK2	0.0173613	-0.237322	0.336	0.447	1	DOK2	1.76042
EMC2	0.0174602	0.202435	0.28	0.167	1	EMC2	1.75795
BACH1	0.0174987	0.136731	0.203	0.1	1	BACH1	1.75699
HELZ	0.0175019	-0.195515	0.308	0.433	1	HELZ	1.75691
ZC3H7A	0.0176134	0.23589	0.35	0.233	1	ZC3H7A	1.75416
ZMAT2	0.0176509	0.215622	0.545	0.413	1	ZMAT2	1.75323
PRPF40A	0.0177783	0.169897	0.643	0.5	1	PRPF40A	1.75011
NCBP2	0.0178443	-0.265587	0.315	0.427	1	NCBP2	1.7485
LIPA	0.0178483	0.103884	0.126	0.047	1	LIPA	1.7484
DEGS1	0.0179313	0.192355	0.399	0.273	1	DEGS1	1.74639
RAD9A	0.0179459	-0.182648	0.098	0.193	1	RAD9A	1.74603
CASC4	0.0180758	0.159368	0.287	0.167	1	CASC4	1.7429
UBL5	0.0182251	0.180405	0.86	0.78	1	UBL5	1.73933
AC068491.3	0.0182935	-0.198956	0.056	0.133	1	AC068491.3	1.7377
SP110	0.0184216	-0.239965	0.476	0.587	1	SP110	1.73467
ABHD17A	0.0184785	0.167136	0.762	0.593	1	ABHD17A	1.73333
TP53TG1	0.0184975	0.132775	0.217	0.113	1	TP53TG1	1.73289
RNF41	0.0185524	-0.162674	0.098	0.193	1	RNF41	1.7316
BCL6	0.018742	-0.124694	0.056	0.14	1	BCL6	1.72718
SSSCA1	0.0192551	0.129441	0.259	0.14	1	SSSCA1	1.71546
DNAJA2	0.0193589	-0.201287	0.538	0.633	1	DNAJA2	1.71312
ZHX2	0.0193736	0.147229	0.112	0.04	1	ZHX2	1.71279
HPRT1	0.0194016	0.207002	0.322	0.207	1	HPRT1	1.71216
CBX1	0.0194867	-0.126429	0.161	0.28	1	CBX1	1.71026
CBX4	0.0195903	0.175632	0.217	0.113	1	CBX4	1.70796
SYNJ1	0.0196883	0.117244	0.147	0.06	1	SYNJ1	1.70579
C3orf14	0.0200086	0.12802	0.112	0.04	1	C3orf14	1.69878
VPS37A	0.0200525	0.118703	0.161	0.073	1	VPS37A	1.69783
ZNF317	0.020078	-0.154794	0.042	0.113	1	ZNF317	1.69728
ICA1	0.0200845	0.162902	0.154	0.067	1	ICA1	1.69714
GNA13	0.0201292	0.190613	0.266	0.153	1	GNA13	1.69617
SUCLG2	0.0202339	-0.222551	0.161	0.267	1	SUCLG2	1.69392
PHACTR4	0.0202815	0.17265	0.168	0.08	1	PHACTR4	1.6929
SIPA1	0.020314	0.185599	0.357	0.233	1	SIPA1	1.6922
ID2	0.020352	-0.397987	0.399	0.493	1	ID2	1.69139
GTF2H2	0.0203866	-0.218774	0.098	0.187	1	GTF2H2	1.69066
GTF2E2	0.0204255	0.117477	0.231	0.12	1	GTF2E2	1.68983
CHCHD2	0.0205016	0.130891	0.986	0.893	1	CHCHD2	1.68821
CBX7	0.0207607	-0.15841	0.126	0.233	1	CBX7	1.68276
WWP1	0.0209575	0.155422	0.301	0.18	1	WWP1	1.67866
JMJD6	0.0210951	0.154572	0.217	0.113	1	JMJD6	1.67582
KIF5B	0.0211583	-0.194343	0.573	0.627	1	KIF5B	1.67452
TMED8	0.0212115	0.141683	0.189	0.093	1	TMED8	1.67343
RNF111	0.0213789	-0.136985	0.042	0.113	1	RNF111	1.67001
MMP25-AS1	0.0216462	-0.197292	0.098	0.187	1	MMP25-AS1	1.66462
B3GNTL1	0.0216761	0.0960057	0.112	0.04	1	B3GNTL1	1.66402
CUL2	0.0220021	0.166305	0.308	0.187	1	CUL2	1.65754
CASP8	0.0220417	-0.204346	0.434	0.56	1	CASP8	1.65676
LXN	0.0221265	0.127486	0.189	0.093	1	LXN	1.65509
ZNF814	0.0222288	-0.141443	0.042	0.113	1	ZNF814	1.65308
44085	0.022399	0.124331	0.238	0.127	1	44085	1.64977
CD3G	0.0225405	-0.167673	0.825	0.92	1	CD3G	1.64704
RSBN1L	0.0226297	-0.157195	0.51	0.593	1	RSBN1L	1.64532
PRDX5	0.0226863	0.210343	0.671	0.553	1	PRDX5	1.64424
MIDN	0.0227834	0.0984862	0.378	0.227	1	MIDN	1.64238
PPA1	0.0229421	0.157317	0.517	0.38	1	PPA1	1.63937
RIOX2	0.023096	0.110896	0.112	0.04	1	RIOX2	1.63646
TMC8	0.0232199	-0.229479	0.315	0.407	1	TMC8	1.63414
KIZ	0.0232212	0.138813	0.119	0.047	1	KIZ	1.63412
YLPM1	0.023468	0.146533	0.224	0.12	1	YLPM1	1.62952
TCEA2	0.0236489	0.0977567	0.112	0.04	1	TCEA2	1.62619
DDX20	0.0236497	-0.139885	0.042	0.113	1	DDX20	1.62617
TNFRSF18	0.0240452	0.435793	0.629	0.56	1	TNFRSF18	1.61897
BRK1	0.0240805	0.13647	0.797	0.687	1	BRK1	1.61833
GLOD4	0.0241341	0.170643	0.413	0.273	1	GLOD4	1.61737
IL27RA	0.0243429	0.17385	0.566	0.427	1	IL27RA	1.61363
ITPA	0.0243471	0.158124	0.378	0.24	1	ITPA	1.61355
LENG9	0.0244039	0.0569602	0.112	0.04	1	LENG9	1.61254
PEBP1	0.0244862	0.192654	0.853	0.747	1	PEBP1	1.61108
DDX19A	0.0244953	0.141797	0.147	0.067	1	DDX19A	1.61092
TRIM73	0.0245234	0.124147	0.28	0.16	1	TRIM73	1.61042
TPRKB	0.0245505	-0.148582	0.126	0.227	1	TPRKB	1.60994
ATP2A3	0.0246451	-0.197919	0.168	0.267	1	ATP2A3	1.60827
PIGF	0.0247095	0.153986	0.252	0.14	1	PIGF	1.60714
HSPB1	0.0247665	0.262212	0.343	0.233	1	HSPB1	1.60614
MZT2B	0.0248672	0.127325	0.832	0.753	1	MZT2B	1.60437
RAB8B	0.0250114	-0.225102	0.224	0.32	1	RAB8B	1.60186
SEC61G	0.0250725	-0.188506	0.559	0.64	1	SEC61G	1.6008
CLN8	0.025168	0.113911	0.14	0.06	1	CLN8	1.59915
TP53BP1	0.0253346	0.0861633	0.224	0.12	1	TP53BP1	1.59629
PSMD11	0.0254636	0.169424	0.51	0.387	1	PSMD11	1.59408
SLC35B1	0.0254727	0.15503	0.175	0.087	1	SLC35B1	1.59393
TFRC	0.0260091	0.292095	0.315	0.207	1	TFRC	1.58488
LDHA	0.0260209	0.146523	0.86	0.827	1	LDHA	1.58468
HIPK1	0.0260844	0.186817	0.231	0.133	1	HIPK1	1.58362
CINP	0.0261789	0.103923	0.231	0.127	1	CINP	1.58205
GLCCI1	0.0265883	0.195659	0.357	0.24	1	GLCCI1	1.57531
B4GALT7	0.0266718	-0.120942	0.056	0.133	1	B4GALT7	1.57395
BANP	0.026673	-0.196133	0.091	0.173	1	BANP	1.57393
RECQL	0.0267428	-0.23978	0.273	0.353	1	RECQL	1.57279
GNPTG	0.0268179	0.140735	0.154	0.073	1	GNPTG	1.57158
FTL	0.0273065	-0.123607	0.986	0.993	1	FTL	1.56373
UBE2L3	0.0274044	0.184633	0.657	0.533	1	UBE2L3	1.56218
CNST	0.0275334	0.111571	0.231	0.127	1	CNST	1.56014
CD70	0.0276113	-0.117527	0.056	0.133	1	CD70	1.55891
KCMF1	0.0278811	0.0968288	0.322	0.193	1	KCMF1	1.55469
TPT1	0.02789	-0.0927621	1	1	1	TPT1	1.55455
LINC01281	0.0281234	0.182966	0.161	0.08	1	LINC01281	1.55093
RAB11FIP2	0.0285949	0.129698	0.154	0.073	1	RAB11FIP2	1.54371
ANKRD46	0.0286418	-0.153666	0.056	0.127	1	ANKRD46	1.543
WBP11	0.0287639	0.145517	0.434	0.3	1	WBP11	1.54115
NFKB2	0.0288218	0.122517	0.364	0.233	1	NFKB2	1.54028
AP003774.4	0.0288408	0.102378	0.119	0.047	1	AP003774.4	1.53999
MTHFS	0.0288448	0.146172	0.126	0.053	1	MTHFS	1.53993
PLPBP	0.0290448	0.121254	0.301	0.187	1	PLPBP	1.53693
PPP1R8	0.0291782	0.170318	0.189	0.1	1	PPP1R8	1.53494
S100PBP	0.029199	-0.191048	0.196	0.293	1	S100PBP	1.53463
APOLD1	0.0292027	0.154735	0.182	0.093	1	APOLD1	1.53458
FBXW5	0.0292159	0.199424	0.538	0.413	1	FBXW5	1.53438
GOSR2	0.0292549	0.123014	0.252	0.14	1	GOSR2	1.5338
SLC35B2	0.0293872	-0.138257	0.042	0.107	1	SLC35B2	1.53184
FABP5	0.0294544	0.259275	0.28	0.173	1	FABP5	1.53085
POLR2E	0.029652	0.205792	0.413	0.293	1	POLR2E	1.52795
CHID1	0.0296604	0.144537	0.231	0.133	1	CHID1	1.52782
BCAT1	0.0296741	0.131057	0.126	0.053	1	BCAT1	1.52762
ATP5PD	0.0297906	0.152327	0.657	0.533	1	ATP5PD	1.52592
HIST1H1D	0.0299146	-0.239246	0.385	0.513	1	HIST1H1D	1.52412
FBXO33	0.0299702	0.179517	0.168	0.087	1	FBXO33	1.52331
ALKBH6	0.0302026	0.105805	0.126	0.053	1	ALKBH6	1.51996
TMA16	0.0304685	0.122968	0.224	0.127	1	TMA16	1.51615
TMEM138	0.0305129	0.130252	0.238	0.133	1	TMEM138	1.51552
NFIC	0.030599	0.178432	0.203	0.113	1	NFIC	1.51429
PAIP1	0.0306757	0.130938	0.287	0.173	1	PAIP1	1.51321
RNF20	0.0308736	0.207003	0.259	0.16	1	RNF20	1.51041
PIK3C2B	0.0309469	0.11798	0.105	0.04	1	PIK3C2B	1.50938
ELF2	0.0314966	-0.201709	0.245	0.333	1	ELF2	1.50174
HTATIP2	0.0314977	0.187325	0.399	0.28	1	HTATIP2	1.50172
MFNG	0.0315691	-0.160839	0.245	0.36	1	MFNG	1.50074
GFER	0.031599	0.110248	0.21	0.113	1	GFER	1.50033
CDCA7	0.0316151	0.124792	0.203	0.107	1	CDCA7	1.50011
C1orf43	0.0316916	-0.21719	0.371	0.46	1	C1orf43	1.49906
RNF13	0.0317669	0.150982	0.294	0.187	1	RNF13	1.49802
BABAM1	0.0318222	-0.20086	0.252	0.34	1	BABAM1	1.49727
HDAC4	0.0319494	-0.118572	0.042	0.107	1	HDAC4	1.49554
MAN1B1	0.0319923	0.105838	0.168	0.08	1	MAN1B1	1.49495
DNAJC18	0.0321668	0.119263	0.105	0.04	1	DNAJC18	1.49259
ST8SIA4	0.032175	-0.197388	0.224	0.327	1	ST8SIA4	1.49248
NUP188	0.0321817	0.0667426	0.119	0.047	1	NUP188	1.49239
CD5	0.0321988	0.175169	0.441	0.293	1	CD5	1.49216
MRPS27	0.0322519	0.10961	0.154	0.073	1	MRPS27	1.49144
SLC9A3R1	0.0322668	-0.155439	0.385	0.493	1	SLC9A3R1	1.49124
GNG4	0.0323613	0.365375	0.287	0.18	1	GNG4	1.48997
RSRC2	0.0323975	-0.221878	0.545	0.613	1	RSRC2	1.48949
IL7R	0.0326005	0.155461	0.664	0.52	1	IL7R	1.48678
PEX26	0.0327762	-0.184864	0.154	0.247	1	PEX26	1.48444
TFCP2	0.032881	0.132988	0.189	0.1	1	TFCP2	1.48305
SEC11C	0.0332696	0.264276	0.629	0.54	1	SEC11C	1.47795
MALAT1	0.0334692	-0.0911816	1	1	1	MALAT1	1.47535
LTA	0.0336252	0.0513398	0.161	0.08	1	LTA	1.47334
ADARB1	0.033931	-0.127002	0.042	0.107	1	ADARB1	1.4694
EPN1	0.0339439	-0.174211	0.091	0.167	1	EPN1	1.46924
RPS16	0.033989	-0.106849	1	1	1	RPS16	1.46866
CLTA	0.034016	0.135921	0.741	0.627	1	CLTA	1.46832
ELK3	0.0341689	0.155342	0.231	0.133	1	ELK3	1.46637
CXCR6	0.0342691	-0.367488	0.196	0.293	1	CXCR6	1.4651
SOS2	0.0343438	-0.208089	0.091	0.167	1	SOS2	1.46415
PDAP1	0.0346628	0.133447	0.594	0.427	1	PDAP1	1.46014
MRI1	0.0346743	0.139072	0.203	0.113	1	MRI1	1.45999
SLC38A1	0.0348039	-0.211898	0.441	0.527	1	SLC38A1	1.45837
AC092683.1	0.0348815	-0.186824	0.266	0.367	1	AC092683.1	1.4574
OXSR1	0.0349305	0.145172	0.245	0.147	1	OXSR1	1.4568
CYB5R4	0.0349743	0.166287	0.182	0.1	1	CYB5R4	1.45625
RPL37A	0.0350494	-0.0865705	0.993	1	1	RPL37A	1.45532
C1orf56	0.0350601	-0.178295	0.231	0.333	1	C1orf56	1.45519
PPME1	0.0351966	0.0949735	0.154	0.073	1	PPME1	1.4535
PGM2L1	0.0353617	0.152734	0.343	0.227	1	PGM2L1	1.45147
NVL	0.0354853	-0.109813	0.042	0.107	1	NVL	1.44995
FBXO31	0.0354853	-0.115269	0.042	0.107	1	FBXO31	1.44995
MRPS7	0.0356424	0.154225	0.448	0.32	1	MRPS7	1.44803
GRAMD2B	0.035721	0.147778	0.112	0.047	1	GRAMD2B	1.44708
AC074032.1	0.0362077	0.12532	0.133	0.06	1	AC074032.1	1.4412
DBP	0.0363682	-0.0855009	0.098	0.187	1	DBP	1.43928
NDUFB2	0.0364506	0.132327	0.685	0.58	1	NDUFB2	1.43829
ZNF766	0.036633	-0.14545	0.126	0.22	1	ZNF766	1.43613
IL18R1	0.0366916	0.0911102	0.133	0.06	1	IL18R1	1.43543
PATL2	0.0372436	-0.12498	0.091	0.173	1	PATL2	1.42895
BET1L	0.0373112	0.12528	0.112	0.047	1	BET1L	1.42816
NMI	0.0373577	-0.189219	0.322	0.413	1	NMI	1.42762
UBE3C	0.0375986	0.090898	0.189	0.1	1	UBE3C	1.42483
TUBGCP3	0.0376685	0.0940541	0.154	0.073	1	TUBGCP3	1.42402
CDKN2AIP	0.0376744	0.153412	0.287	0.18	1	CDKN2AIP	1.42395
AKTIP	0.037846	-0.195214	0.231	0.34	1	AKTIP	1.42198
BBC3	0.0378545	0.156592	0.112	0.047	1	BBC3	1.42188
SLC25A1	0.0378658	0.161509	0.217	0.127	1	SLC25A1	1.42175
BSDC1	0.0379125	0.121129	0.322	0.207	1	BSDC1	1.42122
FLNA	0.0381313	0.189302	0.476	0.347	1	FLNA	1.41872
POR	0.0384442	0.147115	0.168	0.087	1	POR	1.41517
HAUS1	0.038582	-0.160292	0.175	0.267	1	HAUS1	1.41362
SLF1	0.0386649	-0.248726	0.273	0.353	1	SLF1	1.41268
IFT57	0.0389039	0.161244	0.182	0.1	1	IFT57	1.41001
ALG3	0.0389424	0.116447	0.14	0.067	1	ALG3	1.40958
NUDT5	0.0392706	0.13026	0.51	0.373	1	NUDT5	1.40593
CRTC3	0.0392726	-0.226215	0.336	0.42	1	CRTC3	1.40591
ARF5	0.0392993	0.134063	0.462	0.327	1	ARF5	1.40561
SNRPB	0.0393034	-0.131699	0.72	0.767	1	SNRPB	1.40557
AAMP	0.0393584	0.124764	0.28	0.173	1	AAMP	1.40496
GMPR2	0.0393908	0.104556	0.28	0.167	1	GMPR2	1.40461
SMDT1	0.0395054	0.149211	0.685	0.527	1	SMDT1	1.40334
EIF2D	0.0395574	0.141272	0.182	0.1	1	EIF2D	1.40277
SLC39A1	0.0395894	0.146369	0.252	0.153	1	SLC39A1	1.40242
RELB	0.0397815	0.0968414	0.322	0.2	1	RELB	1.40032
ZNF594	0.0399301	-0.102202	0.042	0.107	1	ZNF594	1.3987
NOC3L	0.0401404	0.091933	0.231	0.133	1	NOC3L	1.39642
EP400	0.04016	0.135295	0.252	0.153	1	EP400	1.39621
EIF2A	0.0403342	0.164055	0.336	0.227	1	EIF2A	1.39433
AC084033.3	0.0403849	0.0558228	0.105	0.04	1	AC084033.3	1.39378
KDM1A	0.0403859	0.111403	0.196	0.107	1	KDM1A	1.39377
PRAF2	0.0405134	-0.114113	0.063	0.133	1	PRAF2	1.3924
TYMP	0.0407798	0.309421	0.622	0.567	1	TYMP	1.38955
SPOCK2	0.040823	0.113703	0.937	0.867	1	SPOCK2	1.3891
ACTN4	0.0408912	-0.159089	0.441	0.56	1	ACTN4	1.38837
PRKCSH	0.0412773	0.141202	0.266	0.167	1	PRKCSH	1.38429
VIM-AS1	0.0413459	0.15253	0.182	0.1	1	VIM-AS1	1.38357
LYPLA2	0.041389	-0.183604	0.161	0.247	1	LYPLA2	1.38312
ZDHHC21	0.0417039	0.121901	0.196	0.107	1	ZDHHC21	1.37982
PLPP5	0.0417911	0.085622	0.245	0.14	1	PLPP5	1.37892
C12orf43	0.0418035	0.128432	0.182	0.1	1	C12orf43	1.37879
ARRB2	0.041846	0.0381965	0.385	0.247	1	ARRB2	1.37835
VPS25	0.0421782	0.102491	0.287	0.18	1	VPS25	1.37491
TFAM	0.0421969	-0.178276	0.147	0.233	1	TFAM	1.37472
ARID2	0.0422819	0.163403	0.308	0.2	1	ARID2	1.37385
FTSJ3	0.0422862	0.143763	0.203	0.12	1	FTSJ3	1.3738
ITFG1	0.042898	0.160417	0.224	0.133	1	ITFG1	1.36756
DMAP1	0.0429964	0.134415	0.21	0.12	1	DMAP1	1.36657
NAA30	0.0430161	-0.135786	0.084	0.16	1	NAA30	1.36637
KBTBD2	0.0431475	0.0885881	0.168	0.087	1	KBTBD2	1.36504
DDX46	0.0435669	0.123319	0.755	0.627	1	DDX46	1.36084
CLTC	0.0435927	0.178433	0.378	0.28	1	CLTC	1.36059
CD2AP	0.0439733	-0.129349	0.133	0.22	1	CD2AP	1.35681
SCAMP2	0.0439902	-0.207453	0.329	0.413	1	SCAMP2	1.35664
ZC3H8	0.0441118	0.158733	0.392	0.267	1	ZC3H8	1.35544
HNRNPK	0.0441935	0.148525	0.93	0.833	1	HNRNPK	1.35464
CD6	0.0444197	-0.148647	0.434	0.547	1	CD6	1.35242
CHMP4A	0.0444958	0.131027	0.727	0.613	1	CHMP4A	1.35168
AZIN1	0.0445005	0.134993	0.245	0.147	1	AZIN1	1.35163
DHX57	0.0445855	0.190396	0.133	0.067	1	DHX57	1.35081
TRAPPC2L	0.0448903	0.139186	0.42	0.287	1	TRAPPC2L	1.34785
ARHGAP35	0.0450185	0.10949	0.21	0.12	1	ARHGAP35	1.34661
SERINC1	0.0451425	-0.20448	0.252	0.333	1	SERINC1	1.34541
TAPBPL	0.0451605	0.0922707	0.168	0.087	1	TAPBPL	1.34524
ATP5F1B	0.0452079	-0.149959	0.51	0.607	1	ATP5F1B	1.34479
HIST1H1C	0.0455516	0.139173	0.336	0.213	1	HIST1H1C	1.3415
REST	0.0456236	-0.174284	0.476	0.573	1	REST	1.34081
ATXN2L	0.0458985	0.140357	0.28	0.187	1	ATXN2L	1.3382
TUBGCP2	0.0462175	0.196775	0.322	0.22	1	TUBGCP2	1.33519
PCYOX1	0.0462463	-0.145211	0.091	0.167	1	PCYOX1	1.33492
PSMG3	0.0465138	0.173721	0.252	0.16	1	PSMG3	1.33242
TNFRSF4	0.0466763	0.401262	0.671	0.6	1	TNFRSF4	1.3309
PSMC2	0.0467346	0.150916	0.413	0.293	1	PSMC2	1.33036
DCLRE1C	0.0468348	-0.154584	0.182	0.273	1	DCLRE1C	1.32943
SGCB	0.0468462	0.124957	0.126	0.06	1	SGCB	1.32933
RPA1	0.0471633	0.126486	0.252	0.16	1	RPA1	1.3264
STRADA	0.0472522	0.109221	0.168	0.087	1	STRADA	1.32558
PRPF31	0.0473356	-0.212716	0.308	0.387	1	PRPF31	1.32481
NDUFAF6	0.0474111	-0.0857734	0.049	0.113	1	NDUFAF6	1.32412
DPP9	0.0474312	-0.120588	0.084	0.16	1	DPP9	1.32394
CPD	0.0477363	-0.0920167	0.049	0.113	1	CPD	1.32115
MRPL19	0.0477551	0.129135	0.287	0.18	1	MRPL19	1.32098
CCDC69	0.04786	0.171021	0.308	0.207	1	CCDC69	1.32003
LTBP3	0.0478904	0.0811309	0.273	0.16	1	LTBP3	1.31975
TRIP4	0.0479423	0.129085	0.189	0.107	1	TRIP4	1.31928
HNRNPUL1	0.0479659	0.181572	0.476	0.38	1	HNRNPUL1	1.31907
RPS6KA3	0.048192	-0.105079	0.364	0.48	1	RPS6KA3	1.31702
TMF1	0.0483593	-0.24631	0.371	0.44	1	TMF1	1.31552
XRCC1	0.0483883	0.105687	0.126	0.06	1	XRCC1	1.31526
BAK1	0.0487161	0.126141	0.217	0.127	1	BAK1	1.31233
ERCC1	0.048981	0.126638	0.287	0.187	1	ERCC1	1.30997
CHORDC1	0.0489882	-0.143087	0.28	0.387	1	CHORDC1	1.30991
MORF4L2	0.0490589	-0.173766	0.175	0.267	1	MORF4L2	1.30928
NAA20	0.0491097	0.159966	0.336	0.24	1	NAA20	1.30883
GAPDH	0.0492531	0.0975941	0.986	1	1	GAPDH	1.30757
TMEM161B	0.0493956	0.10552	0.14	0.067	1	TMEM161B	1.30631
ORAI3	0.0495194	-0.137108	0.077	0.147	1	ORAI3	1.30522
BUB3	0.0496016	-0.160136	0.587	0.647	1	BUB3	1.3045
CDKN2D	0.0497922	-0.153526	0.196	0.287	1	CDKN2D	1.30284
C6orf120	0.0499436	0.102503	0.147	0.073	1	C6orf120	1.30152
MTIF3	0.0501372	0.168671	0.476	0.373	1	MTIF3	1.29984
MFSD14C	0.0502113	-0.173343	0.147	0.227	1	MFSD14C	1.2992
DENND4B	0.0505474	0.137817	0.133	0.067	1	DENND4B	1.2963
AGO3	0.0507107	0.144034	0.287	0.187	1	AGO3	1.2949
EPC1	0.0508549	-0.175174	0.357	0.46	1	EPC1	1.29367
ERC1	0.0509321	0.0609521	0.14	0.067	1	ERC1	1.29301
TRA2B	0.0509632	0.13523	0.476	0.36	1	TRA2B	1.29274
TUBB4B	0.0511985	0.181532	0.413	0.307	1	TUBB4B	1.29074
NPAT	0.0512777	-0.17647	0.182	0.267	1	NPAT	1.29007
GSPT2	0.0513261	0.109343	0.189	0.107	1	GSPT2	1.28966
PRPF19	0.0513738	0.116161	0.154	0.08	1	PRPF19	1.28926
KIAA0232	0.0514034	0.138793	0.259	0.167	1	KIAA0232	1.28901
ACAP1	0.0515383	-0.113005	0.874	0.907	1	ACAP1	1.28787
CHD9	0.0521826	0.12374	0.301	0.193	1	CHD9	1.28247
CCNY	0.052185	0.11058	0.28	0.173	1	CCNY	1.28245
CD28	0.0525414	0.0750527	0.413	0.287	1	CD28	1.2795
C12orf4	0.0526561	0.0610905	0.133	0.06	1	C12orf4	1.27855
EZH1	0.0534544	-0.142916	0.175	0.273	1	EZH1	1.27202
PRDM2	0.0534735	0.122075	0.462	0.333	1	PRDM2	1.27186
PPP1R18	0.0536393	-0.142812	0.469	0.593	1	PPP1R18	1.27052
CYTOR	0.0540123	-0.196569	0.636	0.72	1	CYTOR	1.26751
RANBP9	0.0540825	0.110263	0.245	0.153	1	RANBP9	1.26694
NDUFB4	0.0542446	0.0920448	0.608	0.453	1	NDUFB4	1.26564
IFT52	0.054257	0.0898192	0.147	0.073	1	IFT52	1.26554
AC097376.2	0.0542728	0.178358	0.105	0.047	1	AC097376.2	1.26542
NONO	0.0542764	0.173526	0.503	0.367	1	NONO	1.26539
RNF145	0.054669	-0.198333	0.259	0.34	1	RNF145	1.26226
SMC1A	0.0547467	0.169513	0.448	0.333	1	SMC1A	1.26164
GBP5	0.0548741	0.260108	0.531	0.46	1	GBP5	1.26063
CXXC1	0.0549221	0.0525405	0.168	0.087	1	CXXC1	1.26025
UBTF	0.0550158	0.107858	0.524	0.407	1	UBTF	1.25951
ZNF518B	0.0552234	-0.110425	0.084	0.16	1	ZNF518B	1.25788
ALDH9A1	0.0553703	0.138565	0.406	0.293	1	ALDH9A1	1.25672
PIP4K2B	0.0554642	-0.157874	0.049	0.107	1	PIP4K2B	1.25599
TMEM19	0.0558423	-0.132091	0.049	0.107	1	TMEM19	1.25304
ZC3H12D	0.0559395	0.194447	0.224	0.14	1	ZC3H12D	1.25228
UBR1	0.0560941	0.0914475	0.21	0.12	1	UBR1	1.25108
FAM173A	0.0564491	0.103311	0.287	0.187	1	FAM173A	1.24834
SIRT6	0.0567149	0.074194	0.175	0.093	1	SIRT6	1.2463
THOC2	0.056753	0.145579	0.441	0.347	1	THOC2	1.24601
BIN1	0.0569249	-0.176309	0.252	0.333	1	BIN1	1.2447
ZNF721	0.0569291	-0.183215	0.217	0.307	1	ZNF721	1.24467
BLOC1S5	0.0569896	-0.125692	0.049	0.107	1	BLOC1S5	1.2442
SNUPN	0.0571211	0.147728	0.245	0.153	1	SNUPN	1.2432
IDH2	0.0575774	-0.175899	0.343	0.433	1	IDH2	1.23975
STARD10	0.0575991	0.100067	0.154	0.08	1	STARD10	1.23958
GTF2H1	0.0577884	0.105309	0.21	0.127	1	GTF2H1	1.23816
SETDB2	0.0579651	0.085009	0.182	0.1	1	SETDB2	1.23683
STX4	0.0580239	0.124749	0.294	0.187	1	STX4	1.23639
NXT1	0.0581971	0.110157	0.224	0.133	1	NXT1	1.2351
NEPRO	0.0582238	-0.148778	0.168	0.253	1	NEPRO	1.2349
PRR14	0.0582268	0.111392	0.14	0.073	1	PRR14	1.23488
MEA1	0.0582395	-0.153198	0.252	0.34	1	MEA1	1.23478
NME6	0.0583455	0.116477	0.196	0.113	1	NME6	1.23399
TSPOAP1-AS1	0.0587117	0.101242	0.203	0.12	1	TSPOAP1-AS1	1.23128
SIRT7	0.0587372	0.0920089	0.559	0.42	1	SIRT7	1.23109
NXF1	0.0589692	0.104732	0.105	0.047	1	NXF1	1.22937
CISD1	0.0591593	0.192281	0.245	0.167	1	CISD1	1.22798
GTF2F2	0.0591593	-0.125	0.161	0.247	1	GTF2F2	1.22798
IRF3	0.0591885	-0.174896	0.483	0.58	1	IRF3	1.22776
SEPHS2	0.0592966	0.118845	0.42	0.287	1	SEPHS2	1.22697
IFT43	0.059343	-0.115891	0.049	0.107	1	IFT43	1.22663
TRAK1	0.0593753	0.0907332	0.105	0.047	1	TRAK1	1.22639
NKIRAS2	0.0596098	-0.132092	0.077	0.147	1	NKIRAS2	1.22468
KRR1	0.0596427	-0.186276	0.357	0.433	1	KRR1	1.22444
DYNLL1	0.0596591	0.147206	0.902	0.853	1	DYNLL1	1.22432
POU3F1	0.0597289	0.146871	0.203	0.12	1	POU3F1	1.22382
PSMC4	0.059746	-0.198613	0.378	0.433	1	PSMC4	1.22369
ETV6	0.0599536	0.158021	0.406	0.3	1	ETV6	1.22219
SSU72	0.0599577	-0.153904	0.566	0.613	1	SSU72	1.22216
DCAF17	0.0600442	0.0700514	0.126	0.06	1	DCAF17	1.22153
MZT2A	0.0602064	0.118269	0.657	0.52	1	MZT2A	1.22036
CHM	0.0604991	0.118094	0.21	0.127	1	CHM	1.21825
PLP2	0.0605487	0.14295	0.51	0.373	1	PLP2	1.21789
STAMBP	0.0605777	0.14383	0.224	0.14	1	STAMBP	1.21769
ATF6B	0.0607493	0.123765	0.455	0.32	1	ATF6B	1.21646
PLAGL2	0.0607526	-0.109765	0.049	0.107	1	PLAGL2	1.21644
RPAP2	0.0607645	0.183115	0.378	0.267	1	RPAP2	1.21635
STRIP1	0.0607968	0.091997	0.126	0.06	1	STRIP1	1.21612
B9D2	0.0608707	-0.12517	0.112	0.187	1	B9D2	1.21559
ERVK3-1	0.0610143	-0.137728	0.07	0.133	1	ERVK3-1	1.21457
AC018816.1	0.0610232	0.107172	0.105	0.047	1	AC018816.1	1.21451
DNAJC8	0.0613478	-0.170706	0.643	0.693	1	DNAJC8	1.2122
USP25	0.0616267	0.0916352	0.154	0.08	1	USP25	1.21023
PEX6	0.0616673	0.0470192	0.189	0.1	1	PEX6	1.20995
MED25	0.0618382	0.0947588	0.133	0.067	1	MED25	1.20874
JAKMIP1	0.0619599	0.126862	0.112	0.053	1	JAKMIP1	1.20789
IFNG	0.0621036	0.199024	0.189	0.113	1	IFNG	1.20688
METTL18	0.0621058	-0.0981261	0.091	0.167	1	METTL18	1.20687
IKZF1	0.0621488	-0.184915	0.804	0.86	1	IKZF1	1.20657
YBEY	0.0625593	0.117932	0.196	0.113	1	YBEY	1.20371
PAICS	0.0627065	0.135558	0.154	0.087	1	PAICS	1.20269
AGPAT3	0.0627267	0.0908441	0.287	0.18	1	AGPAT3	1.20255
DHDDS	0.062975	0.0727089	0.182	0.1	1	DHDDS	1.20083
FAM168B	0.0629844	-0.132012	0.063	0.127	1	FAM168B	1.20077
PSMG2	0.063114	0.148177	0.552	0.433	1	PSMG2	1.19987
LIMA1	0.06357	0.198232	0.455	0.367	1	LIMA1	1.19675
DPH3	0.0636459	0.113052	0.238	0.147	1	DPH3	1.19623
BRWD3	0.0638188	0.0541011	0.147	0.073	1	BRWD3	1.19505
SMCO4	0.0639401	0.220715	0.427	0.327	1	SMCO4	1.19423
RASA1	0.0641003	0.121406	0.133	0.067	1	RASA1	1.19314
TRAPPC13	0.0644321	0.0936826	0.112	0.053	1	TRAPPC13	1.1909
SEC23B	0.0644547	0.141809	0.154	0.087	1	SEC23B	1.19075
TNRC6C	0.0644579	0.105927	0.168	0.093	1	TNRC6C	1.19072
SIPA1L1	0.0645281	0.099108	0.294	0.2	1	SIPA1L1	1.19025
PRRC1	0.064552	-0.136384	0.077	0.14	1	PRRC1	1.19009
GON7	0.0647234	0.104949	0.203	0.12	1	GON7	1.18894
SP140	0.0647494	-0.197976	0.343	0.427	1	SP140	1.18876
RPA3	0.0647807	0.136089	0.497	0.367	1	RPA3	1.18855
DHX38	0.0648039	0.110227	0.217	0.133	1	DHX38	1.1884
MED10	0.0651129	0.175803	0.406	0.313	1	MED10	1.18633
SH3GLB1	0.065173	0.111878	0.538	0.42	1	SH3GLB1	1.18593
EDF1	0.0653107	0.122923	0.923	0.84	1	EDF1	1.18502
C6orf89	0.0653649	-0.19011	0.21	0.293	1	C6orf89	1.18466
PNPLA6	0.0655208	0.0751755	0.154	0.08	1	PNPLA6	1.18362
POLR3E	0.0655208	-0.187538	0.084	0.147	1	POLR3E	1.18362
TMEM263	0.0657207	0.0837756	0.196	0.113	1	TMEM263	1.1823
CD53	0.06585	-0.188743	0.65	0.673	1	CD53	1.18144
WAPL	0.0660394	0.119176	0.469	0.353	1	WAPL	1.1802
LINC01871	0.0660482	-0.206364	0.161	0.247	1	LINC01871	1.18014
RPL7L1	0.06618	0.115412	0.608	0.467	1	RPL7L1	1.17927
KIAA1586	0.0664303	0.0913196	0.133	0.067	1	KIAA1586	1.17763
ATP5ME	0.0665764	-0.166463	0.51	0.6	1	ATP5ME	1.17668
CASP7	0.0666054	-0.0950597	0.084	0.153	1	CASP7	1.17649
EMC6	0.0666806	-0.143586	0.462	0.513	1	EMC6	1.176
AGO1	0.0668254	0.0918247	0.133	0.067	1	AGO1	1.17506
CD2	0.0669659	-0.127632	0.972	0.993	1	CD2	1.17415
DNAJC19	0.0671754	0.135533	0.434	0.313	1	DNAJC19	1.17279
MTO1	0.0674108	-0.122869	0.119	0.193	1	MTO1	1.17127
LRRC8C	0.0674485	-0.144655	0.154	0.233	1	LRRC8C	1.17103
PPAN	0.0676083	0.113956	0.161	0.087	1	PPAN	1.17
FBL	0.0678342	0.104498	0.364	0.253	1	FBL	1.16855
PGAM5	0.0680221	0.0902114	0.133	0.067	1	PGAM5	1.16735
DDHD1	0.0681027	0.113954	0.566	0.44	1	DDHD1	1.16684
RBBP5	0.0682678	0.109467	0.189	0.107	1	RBBP5	1.16578
SNRPC	0.068302	0.149428	0.483	0.373	1	SNRPC	1.16557
MCUR1	0.0686315	0.09935	0.147	0.08	1	MCUR1	1.16348
MTG2	0.0687329	0.0800974	0.112	0.053	1	MTG2	1.16284
RICTOR	0.0687812	-0.207339	0.357	0.427	1	RICTOR	1.16253
TMED4	0.0691226	-0.208588	0.392	0.453	1	TMED4	1.16038
ZDHHC16	0.0691756	0.107902	0.112	0.053	1	ZDHHC16	1.16005
RPS27L	0.0692057	-0.150632	0.741	0.833	1	RPS27L	1.15986
EIF3B	0.0694743	0.161533	0.427	0.327	1	EIF3B	1.15818
NCF1	0.069612	-0.111821	0.175	0.267	1	NCF1	1.15732
ACSL5	0.0697462	-0.0620875	0.091	0.167	1	ACSL5	1.15648
NUDT9	0.0697816	-0.0822832	0.063	0.127	1	NUDT9	1.15626
HSPD1	0.0698473	0.0909797	0.678	0.56	1	HSPD1	1.15585
EMG1	0.0699862	-0.131421	0.203	0.287	1	EMG1	1.15499
MTOR	0.070094	0.0940949	0.14	0.073	1	MTOR	1.15432
ZDHHC24	0.070124	-0.205478	0.196	0.273	1	ZDHHC24	1.15413
NAE1	0.0702476	-0.205836	0.224	0.3	1	NAE1	1.15337
RYK	0.0702513	0.11156	0.21	0.127	1	RYK	1.15335
CERS4	0.0702752	-0.122592	0.077	0.14	1	CERS4	1.1532
FAR1	0.0705667	0.0706836	0.161	0.087	1	FAR1	1.1514
TMEM87A	0.070572	0.12853	0.371	0.267	1	TMEM87A	1.15137
CTSZ	0.0706254	0.125697	0.35	0.24	1	CTSZ	1.15104
FAM107B	0.0707501	0.134239	0.825	0.727	1	FAM107B	1.15027
FUS	0.0707501	-0.130868	0.769	0.78	1	FUS	1.15027
LGMN	0.0709702	0.155049	0.112	0.053	1	LGMN	1.14892
RBM42	0.0711189	-0.145614	0.154	0.233	1	RBM42	1.14801
XPO1	0.0712132	0.0762435	0.364	0.24	1	XPO1	1.14744
GOLGA7	0.0712343	0.0826501	0.49	0.373	1	GOLGA7	1.14731
FCHSD1	0.0712487	0.063456	0.105	0.047	1	FCHSD1	1.14722
HCCS	0.0712534	-0.13675	0.098	0.167	1	HCCS	1.14719
ACIN1	0.0712899	0.203964	0.364	0.28	1	ACIN1	1.14697
F5	0.0713017	0.103039	0.14	0.073	1	F5	1.1469
PDHX	0.0714247	0.0772027	0.112	0.053	1	PDHX	1.14615
TUBA4A	0.07187	-0.233134	0.566	0.627	1	TUBA4A	1.14345
MRPS2	0.0719077	-0.163791	0.112	0.18	1	MRPS2	1.14322
ARFIP1	0.0719651	-0.0997909	0.056	0.113	1	ARFIP1	1.14288
CNPPD1	0.0722559	0.0714904	0.203	0.12	1	CNPPD1	1.14113
PCBD1	0.0722559	-0.101845	0.119	0.2	1	PCBD1	1.14113
MT-ND2	0.0723797	-0.0732626	0.993	1	1	MT-ND2	1.14038
GPS1	0.072439	0.0714592	0.238	0.147	1	GPS1	1.14003
MRPS25	0.0724665	0.0941514	0.231	0.14	1	MRPS25	1.13986
NDUFB7	0.0728233	0.130928	0.692	0.573	1	NDUFB7	1.13773
IFI35	0.0729837	0.126235	0.392	0.28	1	IFI35	1.13677
HIST1H2BC	0.0731629	0.0426852	0.105	0.047	1	HIST1H2BC	1.13571
CTSL	0.0731745	0.069153	0.427	0.307	1	CTSL	1.13564
MYL12B	0.0732213	-0.091966	0.923	0.947	1	MYL12B	1.13536
TUBGCP5	0.0732499	0.117306	0.119	0.06	1	TUBGCP5	1.13519
GLTP	0.073339	0.13794	0.266	0.18	1	GLTP	1.13466
EPM2AIP1	0.0733776	0.114916	0.315	0.22	1	EPM2AIP1	1.13444
OXR1	0.0734155	0.1252	0.224	0.14	1	OXR1	1.13421
SCLT1	0.0734339	0.0874848	0.175	0.1	1	SCLT1	1.1341
KPNA1	0.0734395	0.134323	0.189	0.113	1	KPNA1	1.13407
PREX1	0.0736248	-0.133448	0.308	0.393	1	PREX1	1.13298
MTCH2	0.0736815	0.097848	0.329	0.22	1	MTCH2	1.13264
EIF6	0.0736901	0.112494	0.413	0.3	1	EIF6	1.13259
FAM122B	0.0737334	0.0943282	0.112	0.053	1	FAM122B	1.13234
TBC1D5	0.0738062	-0.12083	0.098	0.173	1	TBC1D5	1.13191
TRAF3IP1	0.0742024	0.0939088	0.112	0.053	1	TRAF3IP1	1.12958
UFL1	0.074569	-0.170608	0.21	0.293	1	UFL1	1.12744
PDCD1	0.0745783	-0.125881	0.343	0.44	1	PDCD1	1.12739
CEP250	0.0748779	0.112443	0.189	0.113	1	CEP250	1.12565
MKNK2	0.0749315	-0.213989	0.385	0.433	1	MKNK2	1.12534
ZMAT5	0.0749322	0.0701485	0.175	0.1	1	ZMAT5	1.12533
PFDN2	0.0753414	0.122564	0.587	0.473	1	PFDN2	1.12297
PXK	0.0755776	0.0635566	0.133	0.067	1	PXK	1.12161
EFHD2	0.0757807	0.122327	0.49	0.373	1	EFHD2	1.12044
DCAF8	0.0759189	-0.120556	0.091	0.16	1	DCAF8	1.11965
ANKFY1	0.0763145	-0.11976	0.091	0.16	1	ANKFY1	1.11739
ZNF576	0.0763181	-0.12598	0.105	0.173	1	ZNF576	1.11737
DPP3	0.0765363	-0.135218	0.098	0.167	1	DPP3	1.11613
CEP162	0.0765826	-0.111114	0.056	0.113	1	CEP162	1.11587
ARFIP2	0.0772263	0.0790476	0.175	0.1	1	ARFIP2	1.11223
ENTPD1	0.0776383	0.157454	0.413	0.32	1	ENTPD1	1.10992
UBL7	0.077709	0.127966	0.168	0.1	1	UBL7	1.10953
SLAIN2	0.0780763	-0.134234	0.196	0.273	1	SLAIN2	1.10748
DOCK10	0.0780788	-0.187569	0.266	0.347	1	DOCK10	1.10747
DNAJB14	0.078244	0.14398	0.503	0.387	1	DNAJB14	1.10655
ALG1	0.0785338	0.0964227	0.112	0.053	1	ALG1	1.10494
FDPS	0.0786223	0.109393	0.545	0.427	1	FDPS	1.10445
QDPR	0.0787257	-0.141013	0.063	0.12	1	QDPR	1.10388
SNX3	0.0787324	-0.125756	0.538	0.593	1	SNX3	1.10385
WHAMM	0.0787884	-0.0762587	0.105	0.18	1	WHAMM	1.10354
NIT2	0.0788294	-0.0997906	0.175	0.267	1	NIT2	1.10331
RNF19A	0.0793334	0.10279	0.615	0.48	1	RNF19A	1.10054
MAP2K1	0.079421	-0.113737	0.126	0.2	1	MAP2K1	1.10006
NFU1	0.0796579	0.111064	0.196	0.12	1	NFU1	1.09877
GTPBP8	0.0797866	0.140378	0.21	0.127	1	GTPBP8	1.09807
COA3	0.0797904	-0.118447	0.238	0.327	1	COA3	1.09805
GALK2	0.0799514	-0.113511	0.105	0.18	1	GALK2	1.09717
UGGT1	0.0799749	0.0430023	0.175	0.1	1	UGGT1	1.09705
PTPN22	0.0799997	0.113526	0.448	0.32	1	PTPN22	1.09691
SART3	0.0801381	0.129823	0.259	0.173	1	SART3	1.09616
PPIL4	0.0801733	0.147842	0.315	0.22	1	PPIL4	1.09597
ARPC5	0.0801768	0.0948058	0.867	0.873	1	ARPC5	1.09595
PRDX4	0.0802679	0.0634796	0.259	0.167	1	PRDX4	1.09546
SMIM27	0.0803866	-0.135577	0.105	0.173	1	SMIM27	1.09482
TBCE	0.0803867	-0.168417	0.105	0.173	1	TBCE	1.09482
ELOA	0.0804914	0.0768626	0.203	0.12	1	ELOA	1.09425
CYLD	0.0807585	-0.168609	0.671	0.78	1	CYLD	1.09281
AK6	0.0808915	0.107846	0.231	0.147	1	AK6	1.0921
MICU1	0.0809082	0.0811316	0.147	0.08	1	MICU1	1.09201
ATG16L1	0.0809931	-0.142078	0.084	0.147	1	ATG16L1	1.09155
LAPTM5	0.0812004	-0.159727	0.832	0.893	1	LAPTM5	1.09044
FBXO34	0.0812617	0.146587	0.28	0.193	1	FBXO34	1.09011
ARIH1	0.0812745	0.167208	0.252	0.173	1	ARIH1	1.09005
MRPS34	0.0812793	-0.122403	0.58	0.647	1	MRPS34	1.09002
UBL4A	0.08135	0.126272	0.245	0.16	1	UBL4A	1.08964
EIF3E	0.0814164	0.125337	0.825	0.76	1	EIF3E	1.08929
ZFAND2B	0.0814724	0.0976512	0.259	0.173	1	ZFAND2B	1.08899
HSD17B7	0.0816373	0.0722368	0.154	0.087	1	HSD17B7	1.08811
AC100810.1	0.0817238	0.125939	0.168	0.1	1	AC100810.1	1.08765
UTP23	0.0818086	0.113155	0.259	0.173	1	UTP23	1.0872
LSM7	0.0820226	0.155136	0.65	0.567	1	LSM7	1.08607
SYNE2	0.0822829	0.144223	0.86	0.84	1	SYNE2	1.08469
ELOB	0.0823506	0.138951	0.881	0.833	1	ELOB	1.08433
PURB	0.0826807	0.119848	0.21	0.133	1	PURB	1.0826
KLHL9	0.0827191	0.0532213	0.182	0.107	1	KLHL9	1.08239
RIC3	0.0827777	0.125039	0.203	0.127	1	RIC3	1.08209
SNRPF	0.0828224	0.162556	0.51	0.4	1	SNRPF	1.08185
SLC16A1-AS1	0.0830539	-0.173297	0.133	0.207	1	SLC16A1-AS1	1.08064
MRPS5	0.0831603	0.160949	0.399	0.3	1	MRPS5	1.08008
SELENOK	0.08319	0.15098	0.601	0.467	1	SELENOK	1.07993
CLEC2D	0.0832002	-0.162725	0.797	0.807	1	CLEC2D	1.07988
TES	0.0832755	0.111968	0.308	0.213	1	TES	1.07948
PBX4	0.083301	0.131448	0.161	0.093	1	PBX4	1.07935
CCDC88B	0.083568	0.128457	0.231	0.147	1	CCDC88B	1.07796
TMBIM6	0.0835977	0.131955	0.895	0.853	1	TMBIM6	1.07781
ABCC1	0.0836035	0.147302	0.175	0.107	1	ABCC1	1.07778
DCTD	0.0836177	-0.109962	0.084	0.147	1	DCTD	1.0777
JADE1	0.0836848	0.0898969	0.217	0.133	1	JADE1	1.07735
HDAC1	0.0838778	0.111602	0.483	0.367	1	HDAC1	1.07635
PTPN13	0.0840516	0.0699505	0.287	0.187	1	PTPN13	1.07545
EXOSC8	0.0841139	-0.123893	0.252	0.333	1	EXOSC8	1.07513
PAG1	0.0842343	-0.158866	0.524	0.633	1	PAG1	1.07451
CTSH	0.0845404	0.223142	0.259	0.173	1	CTSH	1.07294
CFAP36	0.0845712	0.106341	0.301	0.2	1	CFAP36	1.07278
FKBP11	0.0846497	-0.161437	0.182	0.26	1	FKBP11	1.07237
ZNF445	0.0851868	0.0754664	0.119	0.06	1	ZNF445	1.06963
MBD3	0.0852346	0.104074	0.161	0.093	1	MBD3	1.06938
HERC2	0.0852348	0.11147	0.259	0.173	1	HERC2	1.06938
MAP2K6	0.0854054	-0.133255	0.084	0.147	1	MAP2K6	1.06851
FBH1	0.0856374	0.0837484	0.238	0.153	1	FBH1	1.06734
CARD16	0.0856929	0.123209	0.434	0.32	1	CARD16	1.06706
ATG4B	0.0857051	0.0756778	0.21	0.133	1	ATG4B	1.06699
PICALM	0.0858074	0.142707	0.231	0.153	1	PICALM	1.06648
CCNDBP1	0.0858327	0.0895978	0.643	0.527	1	CCNDBP1	1.06635
SF3B6	0.0859891	-0.140322	0.678	0.707	1	SF3B6	1.06556
SUPT16H	0.0864261	0.120735	0.503	0.373	1	SUPT16H	1.06336
SLC1A4	0.086475	0.127491	0.21	0.133	1	SLC1A4	1.06311
OCIAD2	0.0865458	0.112883	0.741	0.593	1	OCIAD2	1.06275
HSPH1	0.0867823	0.107451	0.266	0.173	1	HSPH1	1.06157
MRPL11	0.0869102	0.0830213	0.413	0.3	1	MRPL11	1.06093
MCM7	0.0871124	0.121893	0.133	0.073	1	MCM7	1.05992
ING2	0.0872759	-0.139349	0.056	0.107	1	ING2	1.05911
NNT-AS1	0.087346	0.118879	0.175	0.107	1	NNT-AS1	1.05876
SND1	0.087415	0.126013	0.28	0.2	1	SND1	1.05841
BNIP3L	0.0874691	0.0580883	0.469	0.347	1	BNIP3L	1.05815
RBM26	0.0874987	0.135323	0.371	0.273	1	RBM26	1.058
MAPKAPK2	0.0874997	0.115695	0.329	0.233	1	MAPKAPK2	1.05799
PCYT2	0.0876428	0.0912755	0.189	0.113	1	PCYT2	1.05728
EVI2B	0.0876751	-0.132536	0.587	0.64	1	EVI2B	1.05712
CARF	0.0878862	-0.136211	0.091	0.153	1	CARF	1.05608
ITGB2-AS1	0.088028	-0.101283	0.063	0.12	1	ITGB2-AS1	1.05538
CDC25B	0.0881518	0.0303975	0.147	0.08	1	CDC25B	1.05477
ATP2C1	0.0882681	0.0725808	0.175	0.1	1	ATP2C1	1.0542
UPP1	0.0883978	-0.145367	0.203	0.28	1	UPP1	1.05356
ZCCHC17	0.0885531	0.0959517	0.266	0.173	1	ZCCHC17	1.0528
CARD11	0.0886094	0.0429443	0.14	0.073	1	CARD11	1.05252
NDUFAF3	0.0887484	0.12735	0.51	0.413	1	NDUFAF3	1.05184
POLR2J3.1	0.0889482	-0.147919	0.713	0.727	1	POLR2J3.1	1.05086
FAM210B	0.0890734	-0.133507	0.084	0.147	1	FAM210B	1.05025
ZDHHC6	0.0892237	0.105504	0.217	0.14	1	ZDHHC6	1.04952
EMC4	0.0892307	0.118635	0.357	0.26	1	EMC4	1.04949
ASB6	0.0893231	0.0469075	0.119	0.06	1	ASB6	1.04904
ZNF92	0.0893374	0.0967686	0.182	0.107	1	ZNF92	1.04897
SIT1	0.0894152	-0.179739	0.434	0.507	1	SIT1	1.04859
PPWD1	0.089513	-0.113608	0.196	0.273	1	PPWD1	1.04811
PFKL	0.089513	-0.160247	0.196	0.273	1	PFKL	1.04811
ARMC10	0.0897675	0.108448	0.245	0.16	1	ARMC10	1.04688
RNF7	0.0900822	-0.111465	0.573	0.633	1	RNF7	1.04536
FAM96A	0.0901257	0.119901	0.287	0.2	1	FAM96A	1.04515
CHMP5	0.0904191	0.175269	0.413	0.34	1	CHMP5	1.04374
CDV3	0.0905461	0.116845	0.699	0.64	1	CDV3	1.04313
SRBD1	0.0906192	-0.110296	0.091	0.153	1	SRBD1	1.04278
CALCOCO2	0.0906197	-0.114556	0.322	0.42	1	CALCOCO2	1.04278
ADAR	0.0908823	0.156102	0.538	0.44	1	ADAR	1.04152
ELAC1	0.0909153	0.0794415	0.119	0.06	1	ELAC1	1.04136
HDHD2	0.0916165	0.0910437	0.238	0.153	1	HDHD2	1.03803
RAC2	0.0916275	-0.134104	0.825	0.86	1	RAC2	1.03797
CCDC58	0.0916532	-0.118194	0.056	0.107	1	CCDC58	1.03785
OTULINL	0.0919069	-0.125756	0.084	0.147	1	OTULINL	1.03665
CTSS	0.0919108	0.127476	0.42	0.313	1	CTSS	1.03663
ACAA1	0.0919108	0.0968637	0.42	0.313	1	ACAA1	1.03663
PACS2	0.0920835	0.112852	0.105	0.053	1	PACS2	1.03582
PSMC1	0.0921023	0.0763903	0.483	0.353	1	PSMC1	1.03573
TM2D3	0.0922556	0.168095	0.301	0.213	1	TM2D3	1.03501
MRPL10	0.092429	-0.108562	0.133	0.207	1	MRPL10	1.03419
CYB5R3	0.0927082	0.0927025	0.203	0.127	1	CYB5R3	1.03288
CDK11A	0.0927687	-0.189089	0.224	0.293	1	CDK11A	1.0326
STAT5A	0.0928226	0.12357	0.266	0.18	1	STAT5A	1.03235
VDAC3	0.0928264	0.13701	0.441	0.34	1	VDAC3	1.03233
MIAT	0.0929456	-0.1974	0.406	0.473	1	MIAT	1.03177
SELENOF	0.0929569	-0.121419	0.594	0.667	1	SELENOF	1.03172
MED30	0.0931304	0.10215	0.189	0.113	1	MED30	1.03091
PCM1	0.0931578	0.139226	0.657	0.593	1	PCM1	1.03078
IFIH1	0.0934273	0.0668393	0.154	0.087	1	IFIH1	1.02953
FGD3	0.0934675	0.140795	0.378	0.28	1	FGD3	1.02934
LINC01727	0.0935924	0.142699	0.133	0.073	1	LINC01727	1.02876
EIF3J-DT	0.0936124	-0.143026	0.196	0.273	1	EIF3J-DT	1.02867
ATP13A2	0.0936196	0.0607929	0.119	0.06	1	ATP13A2	1.02863
LBR	0.0941719	-0.174267	0.455	0.507	1	LBR	1.02608
MSH2	0.0944144	0.109888	0.14	0.08	1	MSH2	1.02496
RNASEH1	0.0945337	0.109753	0.182	0.113	1	RNASEH1	1.02441
DERL2	0.0945929	-0.127147	0.364	0.433	1	DERL2	1.02414
PTPN7	0.0948768	-0.146249	0.748	0.747	1	PTPN7	1.02284
CPSF3	0.0949765	0.12057	0.182	0.113	1	CPSF3	1.02238
HINT3	0.0950507	-0.125807	0.056	0.107	1	HINT3	1.02204
FBXO45	0.0950863	-0.144095	0.133	0.2	1	FBXO45	1.02188
BCL7B	0.0954754	-0.121649	0.189	0.26	1	BCL7B	1.02011
SLC25A36	0.095663	0.0929799	0.273	0.18	1	SLC25A36	1.01926
SHARPIN	0.0960362	0.148413	0.273	0.193	1	SHARPIN	1.01756
MTX2	0.0961799	0.0973669	0.168	0.1	1	MTX2	1.01692
HIPK3	0.0962419	0.0635125	0.196	0.12	1	HIPK3	1.01664
HIST1H2AC	0.0965394	0.107898	0.182	0.113	1	HIST1H2AC	1.0153
LMBRD1	0.0968205	0.123551	0.294	0.2	1	LMBRD1	1.01403
MSH3	0.0968248	0.0677498	0.154	0.087	1	MSH3	1.01401
TRMT13	0.0968597	-0.139933	0.21	0.287	1	TRMT13	1.01386
RAB5IF	0.0969108	0.111449	0.483	0.36	1	RAB5IF	1.01363
ATG2A	0.0969216	-0.133162	0.098	0.16	1	ATG2A	1.01358
CD27	0.0970058	-0.143417	0.552	0.627	1	CD27	1.0132
NDUFS6	0.0973487	0.118063	0.755	0.593	1	NDUFS6	1.01167
ST3GAL5	0.0973978	-0.124005	0.098	0.16	1	ST3GAL5	1.01145
PSAP	0.0974675	0.121007	0.357	0.26	1	PSAP	1.01114
BHLHE40-AS1	0.0976043	0.146713	0.301	0.207	1	BHLHE40-AS1	1.01053
ARL16	0.0976913	-0.15435	0.259	0.327	1	ARL16	1.01014
FANCF	0.0977513	-0.113718	0.091	0.153	1	FANCF	1.00988
VMP1	0.0979227	0.0560299	0.895	0.82	1	VMP1	1.00912
PDCL3	0.0984158	0.0930688	0.385	0.273	1	PDCL3	1.00693
GABPB1-AS1	0.098461	0.074617	0.566	0.427	1	GABPB1-AS1	1.00674
HBP1	0.0985268	0.102877	0.364	0.273	1	HBP1	1.00645
PAM	0.0987352	-0.0992891	0.091	0.153	1	PAM	1.00553
RBM18	0.0988003	-0.0900658	0.084	0.147	1	RBM18	1.00524
GALNT11	0.0989218	-0.0884186	0.105	0.173	1	GALNT11	1.00471
ABCF1	0.0990078	0.12748	0.399	0.28	1	ABCF1	1.00433
VAPA	0.0990636	-0.107019	0.552	0.64	1	VAPA	1.00409
IL10RA	0.0990917	-0.13648	0.357	0.42	1	IL10RA	1.00396
SRPRB	0.099308	0.129792	0.147	0.087	1	SRPRB	1.00302
CD96	0.0994659	-0.220653	0.448	0.507	1	CD96	1.00233
PSME4	0.0994675	-0.171619	0.126	0.193	1	PSME4	1.00232
DUSP2	0.0996658	0.154778	0.35	0.26	1	DUSP2	1.00145
CPT1A	0.0998077	0.173973	0.161	0.1	1	CPT1A	1.00084
PPP6C	0.100438	0.109509	0.21	0.133	1	PPP6C	0.9981
CSGALNACT2	0.100526	-0.16645	0.112	0.173	1	CSGALNACT2	0.997723
ZDHHC13	0.100578	-0.124262	0.077	0.133	1	ZDHHC13	0.997497
PSMB4	0.101095	0.133329	0.629	0.52	1	PSMB4	0.995272
LPXN	0.10142	-0.145582	0.329	0.393	1	LPXN	0.993875
NR3C1	0.101727	0.12972	0.895	0.813	1	NR3C1	0.992562
CALM2	0.10178	0.0961596	0.888	0.86	1	CALM2	0.992338
STK16	0.101893	0.069365	0.217	0.133	1	STK16	0.991857
KCNK6	0.102042	0.0717599	0.161	0.093	1	KCNK6	0.991222
POLI	0.102092	0.0880581	0.133	0.073	1	POLI	0.991007
KLRB1	0.102161	-0.288255	0.58	0.633	1	KLRB1	0.990717
LRP10	0.102167	0.147957	0.51	0.413	1	LRP10	0.990688
MMGT1	0.102212	0.0936521	0.105	0.053	1	MMGT1	0.990499
PTOV1	0.102409	0.0959507	0.168	0.1	1	PTOV1	0.989664
SERF2	0.102559	0.094674	0.979	0.987	1	SERF2	0.989027
EGLN1	0.102565	-0.102002	0.119	0.187	1	EGLN1	0.989002
SAP30BP	0.102612	0.111575	0.266	0.18	1	SAP30BP	0.988802
FAM20B	0.102834	0.0937286	0.105	0.053	1	FAM20B	0.987863
IQCG	0.102834	0.0763079	0.105	0.053	1	IQCG	0.987863
ZBTB7A	0.102839	0.124886	0.392	0.307	1	ZBTB7A	0.987841
RPS28	0.10285	-0.0541263	1	0.993	1	RPS28	0.987794
PTTG1	0.102863	-0.148318	0.35	0.447	1	PTTG1	0.987739
TWISTNB	0.103395	0.0943654	0.168	0.1	1	TWISTNB	0.985501
CD48	0.103537	-0.122993	0.664	0.693	1	CD48	0.984905
IRF2BP2	0.103613	0.147039	0.413	0.313	1	IRF2BP2	0.984585
FIS1	0.103676	0.103046	0.566	0.473	1	FIS1	0.984322
C1orf109	0.103752	0.0898604	0.133	0.073	1	C1orf109	0.984002
MAP2K7	0.103782	-0.113873	0.161	0.233	1	MAP2K7	0.98388
RAB2A	0.103824	-0.133936	0.455	0.513	1	RAB2A	0.983702
HNRNPC	0.103849	0.0833879	0.839	0.767	1	HNRNPC	0.983597
UBE2Q1	0.103912	-0.128897	0.203	0.273	1	UBE2Q1	0.983336
SMU1	0.103918	-0.124086	0.231	0.307	1	SMU1	0.98331
CELF2	0.103948	0.0726888	0.692	0.587	1	CELF2	0.983183
TSTD1	0.104003	0.101863	0.783	0.673	1	TSTD1	0.982952
MYO1F	0.104123	-0.168726	0.399	0.46	1	MYO1F	0.982455
SDE2	0.104289	0.106065	0.154	0.093	1	SDE2	0.981761
RAB14	0.104339	-0.167968	0.322	0.393	1	RAB14	0.981554
RGCC	0.104646	-0.141954	0.385	0.46	1	RGCC	0.980278
SEMA4D	0.105135	0.17079	0.469	0.367	1	SEMA4D	0.978255
LINC02273	0.105325	-0.0819217	0.091	0.153	1	LINC02273	0.977468
E2F6	0.105354	0.083156	0.105	0.053	1	E2F6	0.97735
NOTCH1	0.105438	0.0555327	0.217	0.133	1	NOTCH1	0.977004
CHD2	0.105565	-0.153827	0.399	0.487	1	CHD2	0.976479
CARD19	0.105641	-0.196085	0.105	0.16	1	CARD19	0.976166
DUSP11	0.105815	-0.182074	0.203	0.267	1	DUSP11	0.975452
SPCS2	0.105837	0.108666	0.881	0.827	1	SPCS2	0.975364
ATP11C	0.105991	0.0801717	0.105	0.053	1	ATP11C	0.97473
ZC3H13	0.106064	0.0990001	0.51	0.387	1	ZC3H13	0.974431
TC2N	0.106085	-0.120892	0.427	0.507	1	TC2N	0.974345
PHB	0.106138	0.104034	0.497	0.373	1	PHB	0.974131
BST2	0.106233	0.0908014	0.741	0.653	1	BST2	0.973742
SMARCA5	0.106285	-0.147142	0.497	0.56	1	SMARCA5	0.973529
CSAD	0.106366	-0.12982	0.119	0.18	1	CSAD	0.973196
RBCK1	0.106696	0.15848	0.476	0.407	1	RBCK1	0.971851
C14orf119	0.107506	0.104361	0.517	0.4	1	C14orf119	0.968569
44076	0.107655	0.0967142	0.531	0.413	1	44076	0.967964
KLHDC10	0.107743	-0.0814676	0.056	0.107	1	KLHDC10	0.967612
ADO	0.107743	-0.11558	0.056	0.107	1	ADO	0.967612
CAMK4	0.10776	0.153622	0.343	0.267	1	CAMK4	0.967543
JADE2	0.107809	0.0630576	0.259	0.167	1	JADE2	0.967346
KCTD9	0.10799	0.090749	0.147	0.087	1	KCTD9	0.966615
CLEC2B	0.108032	-0.118982	0.497	0.6	1	CLEC2B	0.966447
EVL	0.108049	-0.102618	0.846	0.88	1	EVL	0.96638
ANAPC4	0.108193	0.0670056	0.203	0.127	1	ANAPC4	0.9658
SLC7A6	0.108304	-0.172417	0.119	0.18	1	SLC7A6	0.965357
NDFIP1	0.108862	0.136907	0.594	0.487	1	NDFIP1	0.963125
CCDC84	0.109071	0.121119	0.224	0.147	1	CCDC84	0.962289
PHF23	0.109132	0.0402191	0.343	0.233	1	PHF23	0.962049
NTPCR	0.109139	0.0887349	0.175	0.107	1	NTPCR	0.96202
LACTB	0.109357	0.0978253	0.147	0.087	1	LACTB	0.961154
RNPS1	0.109376	-0.135049	0.42	0.473	1	RNPS1	0.96108
UBE3B	0.109392	-0.112177	0.084	0.14	1	UBE3B	0.961012
PAAF1	0.10944	-0.113027	0.077	0.133	1	PAAF1	0.960825
USP22	0.109789	0.17414	0.238	0.167	1	USP22	0.95944
CEP164	0.110024	0.062341	0.133	0.073	1	CEP164	0.958513
CNIH1	0.110853	0.173016	0.434	0.34	1	CNIH1	0.955253
STYXL1	0.111015	0.0928999	0.147	0.087	1	STYXL1	0.95462
IQCB1	0.11103	0.0988076	0.14	0.08	1	IQCB1	0.954559
RIOK2	0.111046	0.109203	0.182	0.113	1	RIOK2	0.954497
PAFAH1B2	0.111119	-0.137521	0.196	0.273	1	PAFAH1B2	0.95421
TSPAN2	0.111121	-0.0577185	0.063	0.12	1	TSPAN2	0.954204
CRYZ	0.111202	0.0602767	0.105	0.053	1	CRYZ	0.953888
FRG1	0.111249	0.0689405	0.336	0.24	1	FRG1	0.953702
ACSF3	0.11143	0.075792	0.217	0.14	1	ACSF3	0.952998
PIP4P1	0.111542	0.129166	0.196	0.127	1	PIP4P1	0.952563
SELENOO	0.111605	-0.0832844	0.056	0.107	1	SELENOO	0.952315
TMCO1	0.111612	0.102026	0.657	0.553	1	TMCO1	0.952288
NR2C2AP	0.111855	-0.115389	0.063	0.113	1	NR2C2AP	0.951343
DERA	0.112005	-0.157381	0.133	0.193	1	DERA	0.950762
TMEM115	0.112043	-0.0885719	0.098	0.16	1	TMEM115	0.950614
CNPY2	0.112162	0.148283	0.559	0.447	1	CNPY2	0.950154
HACD1	0.112177	0.100018	0.14	0.08	1	HACD1	0.950096
TXNL4A	0.112309	0.0963315	0.538	0.407	1	TXNL4A	0.949584
TULP4	0.112335	0.12744	0.217	0.147	1	TULP4	0.949485
SMIM30	0.112461	-0.145683	0.098	0.153	1	SMIM30	0.948997
RNF146	0.112724	0.0599991	0.175	0.107	1	RNF146	0.947983
GZMK	0.112725	-0.125822	0.147	0.22	1	GZMK	0.947978
HNRNPU	0.112778	0.136539	0.944	0.853	1	HNRNPU	0.947775
FAM214A	0.112801	-0.138633	0.147	0.213	1	FAM214A	0.947687
SARDH	0.112803	-0.129093	0.112	0.173	1	SARDH	0.947679
SETX	0.113097	-0.188617	0.427	0.473	1	SETX	0.946548
WARS	0.113099	0.120245	0.168	0.107	1	WARS	0.946541
MRPL18	0.113338	0.101885	0.434	0.353	1	MRPL18	0.945625
DDIT4	0.113623	0.149346	0.615	0.533	1	DDIT4	0.944534
SLCO3A1	0.113759	-0.138836	0.063	0.113	1	SLCO3A1	0.944013
SLC11A2	0.113822	0.0921429	0.147	0.087	1	SLC11A2	0.943776
VAMP8	0.114203	-0.121922	0.671	0.733	1	VAMP8	0.942322
TRAM1	0.114326	0.0774592	0.51	0.373	1	TRAM1	0.941856
WDR60	0.114869	0.106298	0.119	0.067	1	WDR60	0.939796
TPD52L2	0.114918	0.0544621	0.161	0.093	1	TPD52L2	0.939613
SYNE1	0.114919	-0.182516	0.517	0.56	1	SYNE1	0.939608
ATIC	0.114943	0.101072	0.266	0.18	1	ATIC	0.939518
TNFRSF1A	0.114995	-0.118978	0.161	0.227	1	TNFRSF1A	0.939321
TRAPPC1	0.115051	0.152651	0.706	0.66	1	TRAPPC1	0.93911
COMMD2	0.115051	-0.138524	0.238	0.307	1	COMMD2	0.939108
TMEM238	0.115191	-0.173805	0.182	0.24	1	TMEM238	0.938581
MVP	0.115489	0.139028	0.483	0.38	1	MVP	0.93746
SH2D3C	0.115504	0.10827	0.119	0.067	1	SH2D3C	0.937405
GGPS1	0.115594	0.121329	0.238	0.167	1	GGPS1	0.937064
AL031846.2	0.115871	0.0798002	0.175	0.107	1	AL031846.2	0.936026
USP12	0.11616	0.0808812	0.182	0.113	1	USP12	0.934943
TCHP	0.116163	0.0881281	0.217	0.14	1	TCHP	0.934933
NENF	0.116332	-0.193192	0.308	0.36	1	NENF	0.9343
VAMP7	0.116421	-0.138604	0.119	0.173	1	VAMP7	0.93397
MIB1	0.116475	0.0758813	0.224	0.147	1	MIB1	0.933767
PNMA1	0.116609	0.0862142	0.231	0.153	1	PNMA1	0.933267
TNFRSF1B	0.116677	-0.0801392	0.42	0.493	1	TNFRSF1B	0.933013
ACOX1	0.116925	-0.0686456	0.056	0.107	1	ACOX1	0.932094
PPP2R2A	0.116936	-0.12866	0.273	0.34	1	PPP2R2A	0.932054
SELPLG	0.117046	-0.116584	0.231	0.32	1	SELPLG	0.931643
ANAPC16	0.117053	0.0836781	0.867	0.8	1	ANAPC16	0.931619
FBXL17	0.117063	-0.148597	0.07	0.12	1	FBXL17	0.931581
LINC00623	0.117115	-0.160536	0.252	0.333	1	LINC00623	0.931388
ABI1	0.117118	-0.161382	0.315	0.367	1	ABI1	0.931375
ZNF230	0.117377	0.118325	0.112	0.06	1	ZNF230	0.930419
CFDP1	0.117499	0.090539	0.392	0.287	1	CFDP1	0.929965
ZNF32	0.117506	0.0961504	0.238	0.16	1	ZNF32	0.929939
EIF3K	0.117572	-0.107781	0.874	0.88	1	EIF3K	0.929698
PIGM	0.117644	-0.105031	0.063	0.113	1	PIGM	0.92943
PDPK1	0.117727	0.0549795	0.189	0.12	1	PDPK1	0.929124
DIS3	0.117915	0.113399	0.315	0.233	1	DIS3	0.92843
TMBIM4	0.118077	-0.123336	0.811	0.86	1	TMBIM4	0.927836
LINC00909	0.118099	0.100981	0.217	0.14	1	LINC00909	0.927752
TCF25	0.118355	-0.139921	0.615	0.687	1	TCF25	0.926815
CALM3	0.118537	0.156295	0.734	0.647	1	CALM3	0.926147
HPCAL1	0.118613	-0.127831	0.343	0.413	1	HPCAL1	0.925868
RBPJ	0.118616	-0.137992	0.636	0.72	1	RBPJ	0.925856
PDXDC1	0.118868	-0.122713	0.14	0.207	1	PDXDC1	0.924936
RASGRP1	0.118991	-0.158211	0.524	0.58	1	RASGRP1	0.924486
DGAT1	0.119041	-0.114018	0.091	0.147	1	DGAT1	0.924303
DYNLL2	0.119048	0.16176	0.189	0.127	1	DYNLL2	0.924277
VCPKMT	0.119395	0.0516479	0.105	0.053	1	VCPKMT	0.923015
AC114760.2	0.11952	-0.0737357	0.077	0.133	1	AC114760.2	0.922559
ATP6V1A	0.119639	0.146958	0.175	0.113	1	ATP6V1A	0.922127
CYCS	0.119693	0.0719386	0.552	0.42	1	CYCS	0.92193
SRSF6	0.1199	0.106874	0.259	0.18	1	SRSF6	0.921181
ARHGAP1	0.120084	-0.152215	0.126	0.187	1	ARHGAP1	0.920517
LYRM4	0.120291	0.139566	0.294	0.213	1	LYRM4	0.919766
HMGXB4	0.120407	-0.21412	0.182	0.24	1	HMGXB4	0.919349
CAPN1	0.12056	0.118429	0.336	0.253	1	CAPN1	0.918796
RWDD4	0.120702	0.0583593	0.154	0.093	1	RWDD4	0.918286
CPA5	0.120747	0.063123	0.112	0.06	1	CPA5	0.918123
F2R	0.120857	-0.124342	0.182	0.247	1	F2R	0.917729
ERAP2	0.120871	-0.118546	0.28	0.367	1	ERAP2	0.917679
IFITM2	0.120887	0.138429	0.727	0.66	1	IFITM2	0.91762
CPM	0.12104	0.124078	0.252	0.187	1	CPM	0.917071
IDI1	0.121123	0.0909734	0.455	0.347	1	IDI1	0.916773
ZNF669	0.12143	0.0747593	0.112	0.06	1	ZNF669	0.915673
RAPGEF1	0.121439	0.0808884	0.273	0.193	1	RAPGEF1	0.915641
HDAC10	0.121547	0.122723	0.245	0.173	1	HDAC10	0.915257
CLPP	0.121612	-0.122685	0.427	0.467	1	CLPP	0.915024
SFMBT2	0.121632	-0.084131	0.063	0.113	1	SFMBT2	0.914952
TAF3	0.121959	0.109238	0.308	0.227	1	TAF3	0.913785
KLHL28	0.12203	0.0886918	0.252	0.173	1	KLHL28	0.913532
KLF9	0.122116	0.0723898	0.112	0.06	1	KLF9	0.913226
RAB21	0.122199	0.104262	0.371	0.273	1	RAB21	0.912932
IFT74	0.122806	0.0545433	0.112	0.06	1	IFT74	0.910782
EXOC7	0.123093	-0.156343	0.252	0.313	1	EXOC7	0.909765
STARD3	0.123117	0.088776	0.203	0.133	1	STARD3	0.909682
YARS	0.123145	0.106965	0.203	0.14	1	YARS	0.909583
ZNF226	0.123192	0.0733943	0.252	0.167	1	ZNF226	0.909416
MTF2	0.123258	0.183871	0.336	0.26	1	MTF2	0.909185
PSMB5	0.123524	0.105402	0.378	0.28	1	PSMB5	0.90825
TUT7	0.12365	0.0510851	0.322	0.22	1	TUT7	0.907807
ANKRD35	0.123785	0.0694013	0.147	0.087	1	ANKRD35	0.907333
TOLLIP	0.123881	0.0991184	0.126	0.073	1	TOLLIP	0.906995
PRPF6	0.12411	0.0774165	0.406	0.287	1	PRPF6	0.906194
TSC22D3	0.124154	0.0845041	0.238	0.16	1	TSC22D3	0.90604
PIN1	0.124183	-0.183579	0.434	0.46	1	PIN1	0.905937
TIA1	0.124388	-0.176975	0.203	0.267	1	TIA1	0.905221
TERF1	0.124544	0.194305	0.35	0.273	1	TERF1	0.904678
ANKRD36B	0.124599	0.0752632	0.175	0.107	1	ANKRD36B	0.904484
ATP6V1F	0.124878	0.112024	0.636	0.52	1	ATP6V1F	0.903514
GTDC1	0.124891	0.0718951	0.112	0.06	1	GTDC1	0.903468
PPM1G	0.125105	0.133721	0.699	0.62	1	PPM1G	0.902726
IDH3B	0.125132	0.122353	0.287	0.207	1	IDH3B	0.90263
NKAPD1	0.125162	0.0673136	0.175	0.107	1	NKAPD1	0.902529
TMEM219	0.125385	0.0936123	0.566	0.447	1	TMEM219	0.901754
SRSF4	0.125443	0.113434	0.65	0.58	1	SRSF4	0.901555
ZNF276	0.125777	0.0952084	0.231	0.153	1	ZNF276	0.900398
BPNT1	0.125844	0.0319597	0.105	0.053	1	BPNT1	0.900168
AC118549.1	0.125903	-0.116911	0.126	0.187	1	AC118549.1	0.899963
ATP13A3	0.126008	-0.203024	0.112	0.167	1	ATP13A3	0.8996
PIEZO1	0.126533	0.0817768	0.147	0.087	1	PIEZO1	0.897798
NCOA2	0.12677	0.0881217	0.203	0.133	1	NCOA2	0.896985
PGGT1B	0.126879	0.081037	0.196	0.127	1	PGGT1B	0.896612
RASA3	0.127251	0.135193	0.196	0.133	1	RASA3	0.895339
TROVE2	0.12764	0.119233	0.42	0.333	1	TROVE2	0.894014
STK40	0.127715	0.0501418	0.112	0.06	1	STK40	0.893758
WDFY2	0.127925	0.119654	0.175	0.113	1	WDFY2	0.893044
RAB11B	0.128095	0.0900998	0.308	0.22	1	RAB11B	0.892469
MFSD10	0.12837	0.0819646	0.503	0.38	1	MFSD10	0.891536
PHC2	0.128414	0.0759596	0.154	0.093	1	PHC2	0.891388
PRMT7	0.128429	0.0362742	0.112	0.06	1	PRMT7	0.891338
VKORC1L1	0.128776	0.101135	0.119	0.067	1	VKORC1L1	0.890165
UBAP1	0.128913	-0.121656	0.091	0.147	1	UBAP1	0.889703
ZNF200	0.129016	-0.0905503	0.084	0.14	1	ZNF200	0.889356
YIPF3	0.129406	0.124663	0.336	0.247	1	YIPF3	0.888046
ABL2	0.12962	0.13381	0.105	0.06	1	ABL2	0.887327
PDHB	0.129683	0.0764142	0.469	0.34	1	PDHB	0.887119
WASHC1	0.129841	-0.106985	0.091	0.147	1	WASHC1	0.886587
RB1CC1	0.12989	-0.120048	0.329	0.393	1	RB1CC1	0.886424
COMMD7	0.129961	-0.192924	0.364	0.413	1	COMMD7	0.886186
FAF2	0.130197	-0.0992793	0.168	0.24	1	FAF2	0.885397
RCHY1	0.130208	-0.1034	0.112	0.173	1	RCHY1	0.885361
ORMDL2	0.130342	0.143958	0.406	0.307	1	ORMDL2	0.884914
LRRC14	0.13052	0.0509731	0.14	0.08	1	LRRC14	0.884322
C1orf216	0.130601	-0.144849	0.112	0.167	1	C1orf216	0.884054
POLR2M	0.130934	-0.115106	0.07	0.12	1	POLR2M	0.882948
FAM117A	0.131091	0.0770928	0.238	0.16	1	FAM117A	0.882426
TXNRD1	0.131115	0.0921581	0.266	0.187	1	TXNRD1	0.882346
ARL3	0.131131	0.122447	0.371	0.28	1	ARL3	0.882294
XPOT	0.131366	0.104968	0.161	0.1	1	XPOT	0.881517
TMEM123	0.131461	0.10286	0.741	0.647	1	TMEM123	0.881202
BAZ2A	0.131472	0.131726	0.322	0.24	1	BAZ2A	0.881168
CPPED1	0.131568	0.060172	0.119	0.067	1	CPPED1	0.880851
TMUB1	0.131721	0.0848739	0.21	0.14	1	TMUB1	0.880345
LNPK	0.131853	-0.18228	0.091	0.14	1	LNPK	0.879911
SAE1	0.132133	0.170247	0.245	0.18	1	SAE1	0.878988
ACTG1	0.132153	0.123516	0.972	0.987	1	ACTG1	0.878924
TADA2B	0.13249	0.0454423	0.147	0.087	1	TADA2B	0.877817
ZNF680	0.132561	0.084993	0.126	0.073	1	ZNF680	0.877584
PHF20L1	0.132593	0.11196	0.378	0.3	1	PHF20L1	0.877479
C19orf66	0.13262	-0.145527	0.287	0.36	1	C19orf66	0.877391
PLEKHA2	0.133237	0.106544	0.217	0.147	1	PLEKHA2	0.875375
PPARG	0.13324	0.0799778	0.175	0.107	1	PPARG	0.875364
ERBIN	0.133258	0.0669412	0.448	0.32	1	ERBIN	0.875308
GCC2	0.133674	-0.144021	0.769	0.78	1	GCC2	0.873953
CUEDC2	0.133718	-0.0863323	0.231	0.3	1	CUEDC2	0.87381
PIM2	0.13409	0.151406	0.364	0.28	1	PIM2	0.872604
HARS	0.134259	0.136429	0.336	0.247	1	HARS	0.872056
PHF11	0.134319	0.149388	0.35	0.273	1	PHF11	0.871862
RPIA	0.134581	-0.0988594	0.161	0.227	1	RPIA	0.871016
EIF4H	0.135332	0.098912	0.406	0.307	1	EIF4H	0.868598
PSMC6	0.135426	0.138711	0.497	0.407	1	PSMC6	0.868299
TXNIP	0.13546	-0.116589	0.657	0.747	1	TXNIP	0.868189
CAPG	0.135486	0.0740782	0.273	0.193	1	CAPG	0.868107
WDR73	0.135567	-0.111873	0.21	0.28	1	WDR73	0.867846
TAOK3	0.135797	-0.212013	0.364	0.433	1	TAOK3	0.867111
TCF7	0.135824	0.137177	0.573	0.493	1	TCF7	0.867025
SRSF1	0.135864	-0.134269	0.308	0.38	1	SRSF1	0.866897
RETREG2	0.136054	0.0674287	0.21	0.14	1	RETREG2	0.866289
HLA-E	0.136089	-0.0732025	0.958	0.973	1	HLA-E	0.866178
HNRNPA1	0.136107	0.0845635	0.916	0.893	1	HNRNPA1	0.86612
POM121C	0.136107	0.138902	0.182	0.12	1	POM121C	0.86612
SASH3	0.136222	-0.0997357	0.259	0.333	1	SASH3	0.865753
UXS1	0.136442	0.0943627	0.364	0.273	1	UXS1	0.865053
TSR3	0.136442	0.116307	0.357	0.28	1	TSR3	0.865052
EID3	0.136542	-0.0910969	0.07	0.12	1	EID3	0.864734
ZNF138	0.136542	-0.11162	0.07	0.12	1	ZNF138	0.864734
CSNK2A1	0.136643	-0.157129	0.28	0.333	1	CSNK2A1	0.864411
KRIT1	0.136968	-0.166711	0.259	0.313	1	KRIT1	0.863382
IPO8	0.137454	0.126737	0.147	0.093	1	IPO8	0.861843
EED	0.137604	-0.124316	0.287	0.36	1	EED	0.861368
DEPDC5	0.13802	0.0683437	0.119	0.067	1	DEPDC5	0.860059
ZDHHC2	0.138103	-0.101075	0.091	0.147	1	ZDHHC2	0.859796
VEZT	0.138199	0.121688	0.189	0.127	1	VEZT	0.859494
COX14	0.138248	0.0845312	0.692	0.607	1	COX14	0.859341
COPS7A	0.138378	0.0828692	0.133	0.08	1	COPS7A	0.858932
PRKCB	0.138448	0.0973541	0.497	0.373	1	PRKCB	0.858713
AC093323.1	0.138455	0.1254	0.182	0.12	1	AC093323.1	0.858691
NDUFV1	0.13847	0.0707697	0.266	0.18	1	NDUFV1	0.858645
DDX52	0.138614	-0.153318	0.203	0.267	1	DDX52	0.858193
ANAPC13	0.13865	-0.0817718	0.063	0.113	1	ANAPC13	0.858082
TLE3	0.139221	-0.140499	0.245	0.313	1	TLE3	0.856295
INTS3	0.139396	-0.065353	0.063	0.113	1	INTS3	0.855748
RBM45	0.139486	0.0522162	0.119	0.067	1	RBM45	0.855469
TRBC2	0.139585	-0.215723	0.832	0.887	1	TRBC2	0.85516
NMRAL1	0.139747	0.0213526	0.168	0.1	1	NMRAL1	0.854658
C12orf57	0.139913	-0.0831558	0.741	0.833	1	C12orf57	0.85414
CRIPT	0.139943	0.103727	0.259	0.18	1	CRIPT	0.854048
LMBR1L	0.140066	-0.110997	0.091	0.147	1	LMBR1L	0.853666
BICDL1	0.140195	0.0720527	0.427	0.313	1	BICDL1	0.853266
JMY	0.140252	-0.139641	0.077	0.127	1	JMY	0.853091
RPS6	0.1405	0.0767983	1	1	1	RPS6	0.852325
PHRF1	0.140572	-0.123381	0.133	0.193	1	PHRF1	0.8521
EML3	0.140582	0.0893759	0.196	0.127	1	EML3	0.852071
SMIM8	0.140624	0.08136	0.168	0.107	1	SMIM8	0.851941
RTN3	0.140661	0.10524	0.287	0.207	1	RTN3	0.851826
SRGAP2C	0.140964	0.0551598	0.119	0.067	1	SRGAP2C	0.85089
NFE2L2	0.141071	0.0770666	0.455	0.353	1	NFE2L2	0.850563
HNRNPR	0.141777	0.09677	0.734	0.647	1	HNRNPR	0.848395
DR1	0.141856	-0.115216	0.406	0.473	1	DR1	0.848151
KLF13	0.142037	0.147147	0.434	0.367	1	KLF13	0.847599
PRCP	0.142428	0.082015	0.126	0.073	1	PRCP	0.846405
AP4S1	0.142552	0.089964	0.133	0.08	1	AP4S1	0.846027
EIF3I	0.142594	0.102166	0.657	0.547	1	EIF3I	0.845899
CD40LG	0.142798	0.108121	0.476	0.38	1	CD40LG	0.845279
C5orf15	0.142835	-0.0941508	0.098	0.153	1	C5orf15	0.845166
GADD45B	0.142893	0.143938	0.196	0.133	1	GADD45B	0.844988
NIP7	0.142902	-0.102394	0.217	0.293	1	NIP7	0.844963
RFLNB	0.142995	-0.135743	0.175	0.24	1	RFLNB	0.844678
NDUFAB1	0.142999	0.0883173	0.608	0.513	1	NDUFAB1	0.844668
DAPK3	0.14307	-0.081394	0.07	0.12	1	DAPK3	0.844451
EXOSC3	0.143117	-0.113095	0.203	0.267	1	EXOSC3	0.844308
GALNT7	0.143178	0.135237	0.112	0.067	1	GALNT7	0.844124
MOB3A	0.143238	-0.125915	0.203	0.273	1	MOB3A	0.843941
SRSF11	0.143646	0.137744	0.692	0.613	1	SRSF11	0.842707
ECHS1	0.143777	-0.129507	0.455	0.507	1	ECHS1	0.842312
TMEM181	0.143866	0.12852	0.161	0.107	1	TMEM181	0.842043
GAPVD1	0.144088	-0.143749	0.189	0.247	1	GAPVD1	0.841373
HCLS1	0.144096	-0.109827	0.622	0.687	1	HCLS1	0.841348
SELENOM	0.144552	0.12658	0.364	0.28	1	SELENOM	0.839976
TOMM40	0.144745	-0.104152	0.161	0.227	1	TOMM40	0.839397
SPHK2	0.145054	-0.143512	0.091	0.14	1	SPHK2	0.838472
NF1	0.145231	0.138932	0.238	0.173	1	NF1	0.837942
ANKRA2	0.145299	-0.0747677	0.07	0.12	1	ANKRA2	0.837739
HELLS	0.145349	0.124152	0.252	0.18	1	HELLS	0.837588
ANAPC11	0.145382	0.0846226	0.566	0.447	1	ANAPC11	0.83749
IMP3	0.145615	-0.112444	0.531	0.547	1	IMP3	0.836795
PGM2	0.146315	0.0694533	0.168	0.107	1	PGM2	0.83471
LSM14B	0.146321	0.0920876	0.14	0.087	1	LSM14B	0.834693
IER3IP1	0.146549	0.0933708	0.301	0.22	1	IER3IP1	0.834016
CRTC2	0.146709	-0.117051	0.077	0.127	1	CRTC2	0.833545
MBNL2	0.147039	0.0125288	0.182	0.113	1	MBNL2	0.832568
AC005838.2	0.14744	-0.101054	0.077	0.127	1	AC005838.2	0.831385
ZBTB11	0.147519	-0.127521	0.168	0.227	1	ZBTB11	0.831151
TAF6	0.147554	-0.0547138	0.07	0.12	1	TAF6	0.83105
PTGES2	0.147831	-0.239754	0.21	0.267	1	PTGES2	0.830234
ELOC	0.147931	0.130354	0.51	0.427	1	ELOC	0.82994
ARF1	0.148004	-0.104327	0.65	0.687	1	ARF1	0.829728
NEDD9	0.148156	0.127689	0.28	0.207	1	NEDD9	0.829281
VAMP4	0.148301	-0.161582	0.133	0.187	1	VAMP4	0.828856
KIF3B	0.148427	0.096728	0.14	0.087	1	KIF3B	0.828486
GOLGB1	0.148557	0.106092	0.58	0.467	1	GOLGB1	0.828107
RIPOR2	0.14857	-0.129174	0.364	0.44	1	RIPOR2	0.82807
PRKCA	0.148909	-0.162899	0.196	0.267	1	PRKCA	0.82708
RCOR1	0.148946	-0.106192	0.084	0.133	1	RCOR1	0.826972
UGP2	0.149164	-0.138585	0.357	0.413	1	UGP2	0.826335
NDUFB1	0.149387	0.124592	0.58	0.493	1	NDUFB1	0.825686
MED19	0.149393	0.0739808	0.259	0.187	1	MED19	0.825669
SYPL1	0.149639	0.0889209	0.371	0.28	1	SYPL1	0.824956
WWP2	0.149814	0.0739894	0.126	0.073	1	WWP2	0.824448
KIAA1328	0.149814	0.0565995	0.126	0.073	1	KIAA1328	0.824448
USF2	0.150013	-0.139964	0.49	0.533	1	USF2	0.823871
DDHD2	0.150089	0.0355422	0.119	0.067	1	DDHD2	0.823652
USP33	0.150154	-0.156719	0.224	0.287	1	USP33	0.823464
PDCD7	0.150221	-0.143625	0.315	0.387	1	PDCD7	0.82327
ABHD12	0.150568	0.0712821	0.126	0.073	1	ABHD12	0.822266
RAB7A	0.151089	-0.128437	0.392	0.467	1	RAB7A	0.820768
AC245060.5	0.15111	-0.124016	0.084	0.133	1	AC245060.5	0.820708
AQR	0.151125	-0.126631	0.175	0.24	1	AQR	0.820663
SNRPD1	0.151152	-0.134441	0.51	0.553	1	SNRPD1	0.820587
MEMO1	0.151271	0.0784694	0.14	0.087	1	MEMO1	0.820244
RNF126	0.151432	0.0808057	0.301	0.213	1	RNF126	0.819783
SORL1	0.151649	-0.157935	0.301	0.36	1	SORL1	0.819161
PAFAH1B1	0.151747	-0.0768631	0.49	0.547	1	PAFAH1B1	0.818881
RSF1	0.151747	0.0512374	0.58	0.46	1	RSF1	0.818881
VEZF1	0.151994	-0.171642	0.14	0.193	1	VEZF1	0.818175
ANKRD36C	0.152047	0.0807699	0.252	0.173	1	ANKRD36C	0.818022
NPM1	0.15217	0.090209	0.937	0.98	1	NPM1	0.817672
TMEM42	0.152205	0.0749446	0.175	0.113	1	TMEM42	0.817572
GRAP	0.152205	0.064043	0.175	0.113	1	GRAP	0.817572
OGA	0.15237	-0.176905	0.343	0.393	1	OGA	0.817101
MADD	0.152499	0.0635696	0.161	0.1	1	MADD	0.816732
LEF1	0.152507	0.0635913	0.385	0.287	1	LEF1	0.816711
HMOX2	0.152572	-0.13411	0.413	0.453	1	HMOX2	0.816525
TRIM27	0.152718	-0.148882	0.224	0.287	1	TRIM27	0.816109
PLEKHM1	0.153125	0.0857151	0.105	0.06	1	PLEKHM1	0.814955
XIST	0.153156	-0.103143	0.881	0.867	1	XIST	0.814865
ICMT	0.153298	-0.107964	0.084	0.133	1	ICMT	0.814464
RRP1	0.153298	-0.131177	0.084	0.133	1	RRP1	0.814464
PARD6A	0.153408	0.0486042	0.133	0.08	1	PARD6A	0.814151
PCNX4	0.153753	0.17099	0.287	0.227	1	PCNX4	0.813175
PPIH	0.153856	-0.115762	0.098	0.147	1	PPIH	0.812886
TENT2	0.15444	0.0232331	0.217	0.14	1	TENT2	0.811241
ATG13	0.15488	-0.134426	0.091	0.14	1	ATG13	0.810003
RUFY2	0.154884	0.0858437	0.14	0.087	1	RUFY2	0.809993
PIK3CB	0.154996	-0.118864	0.063	0.107	1	PIK3CB	0.80968
RNF220	0.155257	0.0432129	0.154	0.093	1	RNF220	0.808948
WTAP	0.155331	-0.111278	0.476	0.5	1	WTAP	0.808742
CBX3	0.155588	0.158869	0.636	0.573	1	CBX3	0.808023
PDE6D	0.156252	-0.124969	0.084	0.133	1	PDE6D	0.806173
STAG2	0.156264	0.0745523	0.427	0.34	1	STAG2	0.806141
CDK4	0.156315	-0.123569	0.119	0.173	1	CDK4	0.805998
AP3M1	0.156334	-0.0923365	0.098	0.153	1	AP3M1	0.805945
SIKE1	0.156394	0.103747	0.266	0.187	1	SIKE1	0.805781
UQCRFS1	0.156426	-0.100337	0.497	0.587	1	UQCRFS1	0.805692
GGCX	0.156625	0.105023	0.112	0.067	1	GGCX	0.80514
RNF121	0.156668	0.0494238	0.154	0.093	1	RNF121	0.805019
MAP7D3	0.156793	0.0657929	0.175	0.113	1	MAP7D3	0.804674
AKAP13	0.157194	-0.167163	0.692	0.693	1	AKAP13	0.803564
SCAF8	0.157288	0.0446265	0.196	0.127	1	SCAF8	0.803304
COPE	0.157329	-0.0829011	0.79	0.793	1	COPE	0.803192
MAF	0.157458	0.110243	0.804	0.713	1	MAF	0.802836
TFDP1	0.157562	-0.101408	0.14	0.2	1	TFDP1	0.802548
MATR3.1	0.157923	0.0737342	0.133	0.08	1	MATR3.1	0.801556
SLFN5	0.158288	-0.0981396	0.72	0.773	1	SLFN5	0.800551
ING3	0.158355	0.103047	0.217	0.153	1	ING3	0.800368
HMG20B	0.158479	0.0405666	0.273	0.187	1	HMG20B	0.80003
TBC1D10A	0.158745	-0.0754437	0.077	0.127	1	TBC1D10A	0.7993
DCXR	0.159227	0.129538	0.329	0.247	1	DCXR	0.797984
TNFRSF14	0.159475	-0.134145	0.455	0.513	1	TNFRSF14	0.797309
ALKBH5	0.159542	0.0359104	0.301	0.213	1	ALKBH5	0.797124
ZNF708	0.160114	-0.143961	0.189	0.253	1	ZNF708	0.79557
GUSB	0.160227	-0.114834	0.161	0.22	1	GUSB	0.795264
NIPSNAP1	0.160238	0.0454459	0.154	0.093	1	NIPSNAP1	0.795234
ADAM17	0.160524	-0.126441	0.147	0.207	1	ADAM17	0.794459
LCP1	0.160764	-0.128546	0.727	0.767	1	LCP1	0.793812
USP8	0.160768	0.0814512	0.399	0.3	1	USP8	0.793801
OASL	0.160781	-0.126448	0.161	0.227	1	OASL	0.793765
FBXW11	0.160795	0.0441865	0.161	0.1	1	FBXW11	0.793728
ATF4	0.160822	0.131433	0.357	0.28	1	ATF4	0.793654
MYD88	0.16095	0.104837	0.175	0.12	1	MYD88	0.79331
BEX2	0.160959	-0.159132	0.098	0.147	1	BEX2	0.793283
SNRPA	0.161085	-0.124006	0.182	0.24	1	SNRPA	0.792945
PSMB7	0.161333	0.104369	0.566	0.46	1	PSMB7	0.792276
NEAT1	0.161477	-0.208445	0.881	0.92	1	NEAT1	0.79189
APRT	0.161584	0.102317	0.916	0.76	1	APRT	0.791602
TFB1M	0.161649	-0.0549699	0.07	0.12	1	TFB1M	0.791427
HLA-DRA	0.161805	0.0442511	0.545	0.453	1	HLA-DRA	0.791007
ACTR2	0.161814	0.0830226	0.776	0.667	1	ACTR2	0.790984
STXBP3	0.161838	0.10927	0.35	0.267	1	STXBP3	0.790921
PTPN2	0.162062	-0.138593	0.357	0.393	1	PTPN2	0.79032
ARRDC1	0.162076	0.0367157	0.308	0.213	1	ARRDC1	0.790281
RPS27	0.162094	-0.0676247	1	1	1	RPS27	0.790234
REPS1	0.162235	0.0439802	0.126	0.073	1	REPS1	0.789857
POLG	0.162293	-0.0958237	0.119	0.173	1	POLG	0.789701
SEPSECS-AS1	0.162306	0.0761763	0.14	0.087	1	SEPSECS-AS1	0.789665
LSG1	0.162361	0.0735254	0.147	0.093	1	LSG1	0.789519
LCK	0.162362	-0.0877932	0.909	0.913	1	LCK	0.789516
PRRC2B	0.162511	0.0682511	0.413	0.313	1	PRRC2B	0.789117
TBC1D4	0.162551	-0.153328	0.392	0.46	1	TBC1D4	0.78901
RAC1	0.162568	0.0902402	0.783	0.72	1	RAC1	0.788966
PSMD13	0.162574	0.0909676	0.58	0.48	1	PSMD13	0.788948
LINC01089	0.162576	0.0975003	0.231	0.16	1	LINC01089	0.788943
FOXK1	0.162656	-0.0839785	0.077	0.127	1	FOXK1	0.78873
SNF8	0.162721	0.135229	0.497	0.44	1	SNF8	0.788557
NSUN5	0.162799	0.0870402	0.245	0.173	1	NSUN5	0.788348
FBXL3	0.162884	0.0628501	0.301	0.22	1	FBXL3	0.788122
TAX1BP3	0.163036	0.0402028	0.126	0.073	1	TAX1BP3	0.787717
DAXX	0.16304	-0.138954	0.231	0.28	1	DAXX	0.787706
PRDX2	0.163041	0.150738	0.776	0.7	1	PRDX2	0.787702
IL6R	0.163043	-0.0959544	0.196	0.267	1	IL6R	0.787698
OSER1	0.163063	0.0749372	0.14	0.087	1	OSER1	0.787645
CD200	0.163176	0.0735954	0.196	0.133	1	CD200	0.787343
PARK7	0.163219	0.0948273	0.944	0.827	1	PARK7	0.787228
NDUFB3	0.16333	0.123859	0.643	0.573	1	NDUFB3	0.786934
PMPCB	0.16346	0.0888024	0.364	0.287	1	PMPCB	0.786588
PSMB8	0.163613	-0.0871032	0.776	0.813	1	PSMB8	0.786181
UTP6	0.163815	-0.131241	0.175	0.227	1	UTP6	0.785647
SPG11	0.164219	0.109062	0.28	0.207	1	SPG11	0.784577
MINK1	0.16424	-0.0693635	0.077	0.127	1	MINK1	0.78452
TOR1AIP2	0.164552	0.0839257	0.252	0.18	1	TOR1AIP2	0.783698
FHL3	0.164581	0.0736076	0.147	0.093	1	FHL3	0.78362
GNG5	0.164619	0.0988653	0.762	0.667	1	GNG5	0.78352
BTG2	0.164648	0.120331	0.49	0.387	1	BTG2	0.783443
ATG5	0.165179	0.0602748	0.315	0.22	1	ATG5	0.782045
RHBDD2	0.165326	0.062613	0.147	0.093	1	RHBDD2	0.781658
NUDT16	0.165349	0.0674026	0.14	0.087	1	NUDT16	0.781599
RHOT1	0.165458	0.0623648	0.126	0.073	1	RHOT1	0.781313
SLC3A2	0.165683	-0.119507	0.378	0.453	1	SLC3A2	0.780722
TAF1B	0.165708	0.0836434	0.182	0.12	1	TAF1B	0.780656
SNRNP40	0.165807	0.143296	0.357	0.287	1	SNRNP40	0.780398
LYPLAL1	0.165856	0.0661224	0.168	0.107	1	LYPLAL1	0.780268
BRF1	0.166031	0.04038	0.105	0.06	1	BRF1	0.779811
BIRC3	0.166206	0.226333	0.643	0.6	1	BIRC3	0.779352
ECE1	0.166459	0.0373809	0.133	0.08	1	ECE1	0.778692
VAPB	0.166462	0.110844	0.168	0.113	1	VAPB	0.778686
TMEM128	0.166462	-0.111617	0.112	0.167	1	TMEM128	0.778686
TLNRD1	0.166886	0.0716429	0.14	0.087	1	TLNRD1	0.777579
ADAT1	0.166919	0.0564768	0.105	0.06	1	ADAT1	0.777493
CD47	0.167058	-0.139126	0.615	0.673	1	CD47	0.777133
CYSLTR1	0.167096	-0.0905937	0.434	0.513	1	CYSLTR1	0.777033
INPP5K	0.167253	0.0482975	0.133	0.08	1	INPP5K	0.776627
ISG15	0.167495	0.300484	0.643	0.587	1	ISG15	0.775999
MLLT10	0.167659	0.0896745	0.161	0.107	1	MLLT10	0.775573
SNRNP25	0.167812	0.0496886	0.105	0.06	1	SNRNP25	0.775178
EBPL	0.167891	0.123335	0.315	0.233	1	EBPL	0.774973
MESD	0.168002	-0.153132	0.406	0.46	1	MESD	0.774686
RAB37	0.168063	0.0960504	0.21	0.147	1	RAB37	0.774528
PRPF38B	0.168305	-0.193233	0.706	0.747	1	PRPF38B	0.773902
PAFAH1B3	0.16838	0.0917107	0.161	0.107	1	PAFAH1B3	0.77371
TMEM127	0.1684	0.0735772	0.112	0.067	1	TMEM127	0.773657
TRIM11	0.168797	0.0615233	0.217	0.147	1	TRIM11	0.772635
CLP1	0.169015	-0.105401	0.091	0.14	1	CLP1	0.772074
ZNF236	0.16909	0.0646714	0.147	0.093	1	ZNF236	0.771882
AC008105.3	0.16919	0.126541	0.427	0.347	1	AC008105.3	0.771626
QTRT1	0.169212	0.0579594	0.14	0.087	1	QTRT1	0.771568
NUP43	0.169381	-0.0975983	0.126	0.18	1	NUP43	0.771136
CTNNBL1	0.1694	0.0818661	0.322	0.24	1	CTNNBL1	0.771087
SERGEF	0.169415	0.0336007	0.168	0.107	1	SERGEF	0.771047
PRR13	0.169964	0.0976682	0.699	0.58	1	PRR13	0.769643
PARVG	0.170203	-0.183288	0.266	0.32	1	PARVG	0.769034
PRKAG1	0.170205	0.0687778	0.273	0.2	1	PRKAG1	0.769028
SAR1B	0.170388	0.0996416	0.385	0.307	1	SAR1B	0.76856
USP10	0.170634	0.103095	0.21	0.147	1	USP10	0.767934
LEMD3	0.17069	-0.104822	0.133	0.187	1	LEMD3	0.767791
ANKRD26	0.170705	0.102939	0.168	0.113	1	ANKRD26	0.767752
EXOSC10	0.170705	0.0963334	0.168	0.113	1	EXOSC10	0.767752
PDE7A	0.170734	-0.185194	0.301	0.353	1	PDE7A	0.76768
PAK1IP1	0.170855	0.0825054	0.168	0.107	1	PAK1IP1	0.767373
COX6B1	0.171032	0.122382	0.832	0.773	1	COX6B1	0.766923
YIPF6	0.171281	0.0662431	0.21	0.147	1	YIPF6	0.76629
CSDE1	0.171323	0.112051	0.741	0.68	1	CSDE1	0.766183
MOCS3	0.171416	0.0761941	0.105	0.06	1	MOCS3	0.765948
NRDE2	0.171421	0.123427	0.168	0.113	1	NRDE2	0.765937
PPP2R1B	0.171596	0.09027	0.119	0.073	1	PPP2R1B	0.765493
CLUAP1	0.171679	-0.133161	0.154	0.207	1	CLUAP1	0.765284
RPL23	0.171971	0.078892	0.937	0.92	1	RPL23	0.764545
B3GALNT2	0.172327	0.0655565	0.105	0.06	1	B3GALNT2	0.763648
SSBP3	0.172352	0.0497903	0.14	0.087	1	SSBP3	0.763584
AATF	0.172384	0.13345	0.378	0.307	1	AATF	0.763502
RBM7	0.172642	-0.0775881	0.217	0.287	1	RBM7	0.762854
PDIA6	0.172736	0.143827	0.727	0.647	1	PDIA6	0.762617
PTPN9	0.172763	0.0664068	0.112	0.067	1	PTPN9	0.762549
TRIM52	0.172946	-0.140746	0.182	0.24	1	TRIM52	0.762089
ADSL	0.173031	0.0368669	0.168	0.107	1	ADSL	0.761876
LAGE3	0.173196	0.101343	0.385	0.307	1	LAGE3	0.761463
SUN2	0.173361	0.0854419	0.51	0.433	1	SUN2	0.761048
GSTO1	0.173413	0.13453	0.545	0.487	1	GSTO1	0.760918
GINM1	0.173805	0.0992151	0.224	0.16	1	GINM1	0.759937
LARP7	0.173826	0.11417	0.455	0.38	1	LARP7	0.759885
CNOT9	0.173948	0.0945199	0.217	0.153	1	CNOT9	0.759581
PSMD5	0.173992	-0.066435	0.077	0.127	1	PSMD5	0.75947
AP5Z1	0.174824	-0.072586	0.077	0.127	1	AP5Z1	0.757399
LY96	0.175804	0.179864	0.329	0.253	1	LY96	0.754971
KIFAP3	0.175873	0.086518	0.119	0.073	1	KIFAP3	0.754801
CIZ1	0.176039	-0.091019	0.091	0.14	1	CIZ1	0.754391
SCAF11	0.176088	0.111714	0.769	0.72	1	SCAF11	0.75427
GPX4	0.176261	0.151095	0.818	0.74	1	GPX4	0.753843
ZCRB1	0.1766	0.0620912	0.462	0.353	1	ZCRB1	0.753009
HECA	0.176668	0.0625015	0.273	0.193	1	HECA	0.752842
MYO9B	0.176731	0.0338751	0.322	0.227	1	MYO9B	0.752686
RAD54L2	0.176738	0.0889952	0.119	0.073	1	RAD54L2	0.75267
PDCD2	0.176955	-0.0994526	0.357	0.42	1	PDCD2	0.752138
PEX13	0.177337	-0.0689528	0.077	0.127	1	PEX13	0.7512
C17orf67	0.177598	0.0777986	0.154	0.1	1	C17orf67	0.750561
ANKRD49	0.177659	-0.0807565	0.224	0.293	1	ANKRD49	0.750413
NTMT1	0.177869	0.0985051	0.245	0.18	1	NTMT1	0.749899
EIF1AX	0.178067	0.123497	0.566	0.48	1	EIF1AX	0.749416
SBNO2	0.178389	-0.162152	0.287	0.327	1	SBNO2	0.748631
CLSTN1	0.178548	0.0766884	0.196	0.133	1	CLSTN1	0.748245
AHCYL1	0.178747	0.0986435	0.28	0.213	1	AHCYL1	0.747761
ANKZF1	0.178747	-0.133106	0.217	0.273	1	ANKZF1	0.747761
RFC4	0.178761	0.0598322	0.14	0.087	1	RFC4	0.747727
ANGEL2	0.178923	-0.101282	0.133	0.187	1	ANGEL2	0.747334
NIPSNAP2	0.17924	0.0680028	0.189	0.127	1	NIPSNAP2	0.746566
GSPT1	0.179326	0.103906	0.503	0.453	1	GSPT1	0.746358
HNRNPD	0.179614	-0.12017	0.706	0.7	1	HNRNPD	0.745659
FRA10AC1	0.179834	0.0794251	0.217	0.153	1	FRA10AC1	0.745129
NDUFS5	0.179918	0.0973582	0.909	0.767	1	NDUFS5	0.744927
EFCAB14	0.17993	0.132022	0.28	0.213	1	EFCAB14	0.744897
CCDC127	0.17997	0.0698046	0.147	0.093	1	CCDC127	0.744799
TNFSF14	0.180279	-0.115482	0.196	0.267	1	TNFSF14	0.744055
RBBP4	0.180283	0.0963748	0.483	0.373	1	RBBP4	0.744046
ISCU	0.180348	0.114355	0.79	0.7	1	ISCU	0.743887
AL133453.1	0.180468	0.0611637	0.28	0.2	1	AL133453.1	0.743599
SPAG16	0.180654	0.041609	0.189	0.127	1	SPAG16	0.743151
DYRK1A	0.180661	-0.138549	0.217	0.267	1	DYRK1A	0.743135
P4HTM	0.180699	-0.114423	0.105	0.153	1	P4HTM	0.743043
MEF2A	0.180767	0.0748083	0.147	0.093	1	MEF2A	0.742881
NFKBIZ	0.180775	-0.0669113	0.175	0.24	1	NFKBIZ	0.742863
LSM6	0.180845	0.0984109	0.566	0.493	1	LSM6	0.742694
HSPB11	0.180929	0.0772232	0.427	0.327	1	HSPB11	0.742491
THUMPD2	0.18117	0.0150254	0.133	0.08	1	THUMPD2	0.741913
RPS19BP1	0.181416	-0.0811121	0.524	0.58	1	RPS19BP1	0.741325
TRAPPC8	0.181628	0.0438288	0.105	0.06	1	TRAPPC8	0.740817
SUSD6	0.181629	-0.081489	0.182	0.24	1	SUSD6	0.740814
GMPS	0.181629	-0.110254	0.182	0.24	1	GMPS	0.740814
CCAR1	0.182078	-0.130266	0.301	0.38	1	CCAR1	0.739743
BCL3	0.182244	-0.102044	0.105	0.153	1	BCL3	0.739348
ZYX	0.182424	0.0997771	0.238	0.173	1	ZYX	0.738918
TDP2	0.182579	-0.159237	0.126	0.173	1	TDP2	0.73855
UBE2D3	0.182666	-0.0677319	0.741	0.807	1	UBE2D3	0.738341
MFSD5	0.182737	-0.108881	0.077	0.12	1	MFSD5	0.738173
HPS3	0.182881	0.0931242	0.119	0.073	1	HPS3	0.737831
SLC4A1AP	0.182896	0.100094	0.245	0.18	1	SLC4A1AP	0.737796
YRDC	0.183019	0.0359166	0.161	0.1	1	YRDC	0.737503
HMGCL	0.183169	0.076873	0.168	0.113	1	HMGCL	0.737148
UBAC1	0.183532	0.0423182	0.252	0.173	1	UBAC1	0.736289
HAGH	0.183633	0.120046	0.413	0.347	1	HAGH	0.73605
FBXW2	0.183709	-0.143509	0.224	0.28	1	FBXW2	0.73587
PQBP1	0.183738	0.0993937	0.301	0.233	1	PQBP1	0.7358
SEC22B	0.18378	-0.176499	0.301	0.34	1	SEC22B	0.735702
CSTF2T	0.183805	0.0757426	0.203	0.14	1	CSTF2T	0.735642
44080	0.183874	0.0523455	0.909	0.907	1	44080	0.73548
XRN1	0.183929	0.0555374	0.455	0.353	1	XRN1	0.735349
OAS3	0.18449	0.0505429	0.105	0.06	1	OAS3	0.734028
GBP3	0.184501	-0.168239	0.147	0.193	1	GBP3	0.734002
EIF4G1	0.18455	0.130767	0.301	0.24	1	EIF4G1	0.733885
NCOA3	0.184887	0.112467	0.322	0.247	1	NCOA3	0.733094
QKI	0.185286	0.0742054	0.252	0.18	1	QKI	0.732156
NAA38	0.185375	-0.151623	0.385	0.44	1	NAA38	0.73195
KCTD2	0.185428	0.0219591	0.112	0.067	1	KCTD2	0.731824
WDR20	0.185602	0.0693838	0.147	0.093	1	WDR20	0.731419
RPL10	0.185645	-0.0479097	1	1	1	RPL10	0.731318
MRPS33	0.18573	0.0506927	0.378	0.287	1	MRPS33	0.731118
TBRG4	0.185757	-0.127113	0.112	0.16	1	TBRG4	0.731055
GRSF1	0.186089	0.0595555	0.308	0.227	1	GRSF1	0.730279
PDIA4	0.186305	0.0689238	0.238	0.173	1	PDIA4	0.729776
PIGC	0.186321	0.0310783	0.21	0.14	1	PIGC	0.729738
APOL2	0.186428	-0.0921067	0.189	0.253	1	APOL2	0.72949
DRAM2	0.186457	0.0702748	0.266	0.193	1	DRAM2	0.72942
MRPL48	0.186545	0.105115	0.217	0.153	1	MRPL48	0.729215
LDLRAD4	0.186663	0.161449	0.315	0.24	1	LDLRAD4	0.728943
CDC26	0.186699	0.0786432	0.524	0.407	1	CDC26	0.728858
SRI	0.187198	0.0816216	0.706	0.587	1	SRI	0.727699
TRUB2	0.18733	-0.0986968	0.105	0.153	1	TRUB2	0.727394
CYBC1	0.187338	-0.106455	0.448	0.52	1	CYBC1	0.727375
PRKAA1	0.187345	-0.1177	0.231	0.28	1	PRKAA1	0.727358
ZNF277	0.1877	0.0505902	0.196	0.133	1	ZNF277	0.726536
ODC1	0.187847	0.12887	0.245	0.187	1	ODC1	0.726195
DPF2	0.187858	0.128949	0.315	0.26	1	DPF2	0.726171
GBP4	0.187924	0.116575	0.483	0.407	1	GBP4	0.726017
CCM2	0.188123	-0.0645748	0.531	0.587	1	CCM2	0.725558
CCDC93	0.188226	0.112575	0.14	0.093	1	CCDC93	0.725321
ARHGAP9	0.188691	0.0821894	0.371	0.287	1	ARHGAP9	0.724248
RPL12	0.188874	0.0541976	1	0.993	1	RPL12	0.723828
RRAS	0.188877	0.0494516	0.147	0.093	1	RRAS	0.72382
SRSF9	0.188924	-0.129054	0.706	0.793	1	SRSF9	0.723713
MRE11	0.18906	0.101109	0.14	0.093	1	MRE11	0.723401
JAK3	0.189269	-0.135297	0.406	0.467	1	JAK3	0.722921
CCDC25	0.18942	0.0703755	0.301	0.227	1	CCDC25	0.722574
RANGRF	0.189476	-0.132983	0.182	0.233	1	RANGRF	0.722446
NFATC1	0.189584	0.0808568	0.168	0.12	1	NFATC1	0.722199
SFPQ	0.189586	0.11074	0.727	0.673	1	SFPQ	0.722195
RBM17	0.189613	0.120692	0.42	0.36	1	RBM17	0.722133
BICD2	0.190281	-0.109818	0.077	0.12	1	BICD2	0.720604
MHENCR	0.190309	0.070992	0.161	0.107	1	MHENCR	0.720542
NFE2L3	0.190309	0.0659947	0.161	0.107	1	NFE2L3	0.720542
SF3B2	0.19037	-0.124541	0.566	0.593	1	SF3B2	0.720402
PRR14L	0.19044	-0.137668	0.154	0.207	1	PRR14L	0.720243
H2AFY	0.190613	0.0824146	0.462	0.36	1	H2AFY	0.719847
EXOSC7	0.190901	0.105283	0.259	0.193	1	EXOSC7	0.719192
RBM28	0.190985	0.0769374	0.238	0.167	1	RBM28	0.719001
TYK2	0.191658	0.0935048	0.133	0.087	1	TYK2	0.717474
GSTP1	0.191847	0.101824	0.483	0.393	1	GSTP1	0.717045
SMARCC2	0.191869	0.152099	0.364	0.307	1	SMARCC2	0.716996
MRPS26	0.192088	-0.141894	0.252	0.307	1	MRPS26	0.716499
ACSS1	0.192967	0.0500198	0.112	0.067	1	ACSS1	0.714517
ZEB1	0.193264	0.178279	0.336	0.28	1	ZEB1	0.71385
NT5DC1	0.193393	0.0740668	0.287	0.213	1	NT5DC1	0.71356
PDCD10	0.193803	0.107333	0.552	0.447	1	PDCD10	0.71264
AKAP10	0.193881	-0.177733	0.105	0.147	1	AKAP10	0.712465
PIGT	0.193935	0.103116	0.217	0.16	1	PIGT	0.712345
PBXIP1	0.193974	0.0731632	0.636	0.533	1	PBXIP1	0.712257
NR2C2	0.194688	-0.0632499	0.063	0.107	1	NR2C2	0.71066
KIAA1147	0.19469	-0.131217	0.091	0.133	1	KIAA1147	0.710656
ABTB1	0.194712	-0.126752	0.28	0.333	1	ABTB1	0.710606
YAF2	0.194755	0.0370671	0.231	0.16	1	YAF2	0.710512
CCDC66	0.194889	0.0835786	0.427	0.34	1	CCDC66	0.710212
SKAP1	0.195075	-0.156913	0.517	0.547	1	SKAP1	0.709799
PREB	0.195269	0.0383773	0.105	0.06	1	PREB	0.709368
MRPL27	0.195526	0.0742839	0.336	0.253	1	MRPL27	0.708795
PMVK	0.195737	0.0875376	0.364	0.293	1	PMVK	0.708327
EP300	0.195813	-0.106636	0.308	0.36	1	EP300	0.708159
CREM	0.195835	0.168199	0.538	0.46	1	CREM	0.708109
ZNF43	0.195851	0.0319813	0.112	0.067	1	ZNF43	0.708073
IL12RB1	0.195888	0.103856	0.203	0.147	1	IL12RB1	0.707993
PHF12	0.195888	0.124491	0.203	0.147	1	PHF12	0.707993
FAM177A1	0.195926	0.096728	0.49	0.4	1	FAM177A1	0.707908
ANO6	0.196028	0.0899352	0.133	0.087	1	ANO6	0.707683
UNC119	0.19625	0.0676992	0.217	0.153	1	UNC119	0.70719
VPS4A	0.19642	0.130446	0.252	0.193	1	VPS4A	0.706815
CIR1	0.196507	0.092848	0.448	0.367	1	CIR1	0.706622
MIF	0.196602	-0.135456	0.427	0.48	1	MIF	0.706412
ARL2	0.196951	0.0828891	0.238	0.173	1	ARL2	0.705642
ARCN1	0.197272	0.0601551	0.315	0.233	1	ARCN1	0.704936
FTX	0.197425	-0.115963	0.441	0.48	1	FTX	0.704597
WDR74	0.197767	0.0878033	0.189	0.133	1	WDR74	0.703847
TRPT1	0.197796	0.0844592	0.133	0.087	1	TRPT1	0.703783
P2RX5	0.197982	0.130978	0.14	0.093	1	P2RX5	0.703374
TMEM170A	0.198209	-0.125702	0.154	0.207	1	TMEM170A	0.702876
APLP2	0.198551	0.0921035	0.224	0.16	1	APLP2	0.702128
GIGYF2	0.198622	0.128355	0.336	0.273	1	GIGYF2	0.701973
AKT3	0.198664	-0.113602	0.133	0.18	1	AKT3	0.701881
OSTF1	0.198666	0.0734863	0.503	0.4	1	OSTF1	0.701877
PRMT2	0.198755	0.0699931	0.664	0.567	1	PRMT2	0.701681
EID2	0.199457	-0.090397	0.119	0.173	1	EID2	0.700151
POLG2	0.200151	0.0870594	0.14	0.093	1	POLG2	0.698641
EIF5	0.20028	-0.0786259	0.629	0.72	1	EIF5	0.698363
MRPL43	0.200624	-0.0893142	0.392	0.453	1	MRPL43	0.697616
YIPF2	0.200729	0.0157202	0.112	0.067	1	YIPF2	0.697391
ARID1B	0.200997	-0.0946396	0.538	0.587	1	ARID1B	0.696811
SERINC5	0.201092	-0.16018	0.28	0.32	1	SERINC5	0.696605
GBP2	0.201905	0.119323	0.545	0.46	1	GBP2	0.694854
MRPL46	0.202007	0.060566	0.231	0.167	1	MRPL46	0.694635
FPGS	0.202267	0.0879641	0.133	0.087	1	FPGS	0.694074
GNA15	0.203203	-0.113231	0.147	0.2	1	GNA15	0.69207
ANXA4	0.203411	0.0609365	0.175	0.12	1	ANXA4	0.691626
TAF10	0.203471	0.0617723	0.552	0.42	1	TAF10	0.691497
MTMR9	0.203646	0.0718804	0.196	0.14	1	MTMR9	0.691125
CCNB1IP1	0.203677	-0.0841991	0.077	0.12	1	CCNB1IP1	0.691059
RPL36	0.204164	-0.0528745	1	0.993	1	RPL36	0.69002
ZRSR2	0.204317	0.0220005	0.21	0.14	1	ZRSR2	0.689695
ARF4	0.204341	0.0931694	0.364	0.28	1	ARF4	0.689644
MRPL28	0.204372	-0.10103	0.329	0.393	1	MRPL28	0.689579
RAB18	0.204587	-0.134413	0.259	0.307	1	RAB18	0.689121
PTPRE	0.204732	-0.123239	0.14	0.187	1	PTPRE	0.688815
LAS1L	0.204898	0.0737952	0.126	0.08	1	LAS1L	0.688461
RC3H2	0.204907	-0.155978	0.168	0.22	1	RC3H2	0.688443
SNHG8	0.205113	0.115508	0.455	0.387	1	SNHG8	0.688007
ACTL6A	0.205223	-0.16669	0.182	0.227	1	ACTL6A	0.687773
PPP3CB	0.20536	0.0667503	0.259	0.193	1	PPP3CB	0.687484
ZMYM5	0.205581	-0.0787045	0.196	0.26	1	ZMYM5	0.687017
GRN	0.205898	0.0212943	0.147	0.093	1	GRN	0.686349
NAMPT	0.205989	-0.114012	0.133	0.18	1	NAMPT	0.686155
PUM1	0.206086	-0.118098	0.266	0.32	1	PUM1	0.685951
SH3BGRL3	0.206385	-0.0705808	1	1	1	SH3BGRL3	0.685322
NUCB2	0.206668	0.0274061	0.406	0.32	1	NUCB2	0.684726
RAP2B	0.206702	-0.100998	0.266	0.32	1	RAP2B	0.684655
ZNF600	0.206708	-0.042931	0.063	0.107	1	ZNF600	0.684642
ZNF431	0.206783	-0.106763	0.224	0.273	1	ZNF431	0.684485
DUT	0.20683	0.105044	0.441	0.38	1	DUT	0.684386
KIAA1109	0.20699	0.112041	0.308	0.247	1	KIAA1109	0.684051
ZNF136	0.207085	0.0548643	0.119	0.073	1	ZNF136	0.683851
PXMP4	0.207085	0.0388295	0.119	0.073	1	PXMP4	0.683851
ZNF227	0.20725	0.0443442	0.126	0.08	1	ZNF227	0.683506
HACD2	0.20749	-0.0985382	0.077	0.12	1	HACD2	0.683003
PHTF2	0.207676	-0.145931	0.315	0.36	1	PHTF2	0.682613
CD58	0.207749	-0.110846	0.245	0.293	1	CD58	0.682462
ITCH	0.208061	0.0555916	0.119	0.073	1	ITCH	0.68181
LMCD1	0.208104	0.0873492	0.14	0.093	1	LMCD1	0.68172
TRIM26	0.20819	0.0749182	0.133	0.087	1	TRIM26	0.681541
NOSIP	0.208401	0.0910594	0.455	0.373	1	NOSIP	0.6811
STAU2	0.208579	0.0433974	0.196	0.133	1	STAU2	0.68073
YWHAZ	0.208602	0.0555879	0.825	0.78	1	YWHAZ	0.680681
TRAF7	0.20867	0.0551513	0.126	0.08	1	TRAF7	0.68054
RGS14	0.20871	-0.0798916	0.224	0.28	1	RGS14	0.680457
CTSC	0.208742	-0.150763	0.587	0.607	1	CTSC	0.680391
ZC3H18	0.208871	-0.084194	0.273	0.333	1	ZC3H18	0.680123
DHX15	0.208914	-0.141312	0.196	0.24	1	DHX15	0.680033
MGAT2	0.208914	-0.0972602	0.182	0.24	1	MGAT2	0.680031
ERCC6	0.209039	0.0573382	0.119	0.073	1	ERCC6	0.679772
CKAP5	0.209348	-0.105999	0.091	0.133	1	CKAP5	0.679131
KMT2B	0.209642	0.0262915	0.357	0.26	1	KMT2B	0.678523
NSMCE4A	0.209677	0.133681	0.273	0.207	1	NSMCE4A	0.67845
PDS5B	0.210025	0.0769569	0.301	0.227	1	PDS5B	0.67773
SMIM29	0.210096	0.0502498	0.168	0.113	1	SMIM29	0.677582
DNPH1	0.210697	0.111597	0.65	0.553	1	DNPH1	0.676341
MRPS16	0.210809	-0.125714	0.357	0.4	1	MRPS16	0.676112
TTN	0.211006	0.0446599	0.119	0.073	1	TTN	0.675704
ATXN2	0.211153	-0.0960985	0.252	0.307	1	ATXN2	0.675403
COA6	0.211293	0.0501031	0.42	0.327	1	COA6	0.675116
TRMT10C	0.211411	0.0786485	0.35	0.28	1	TRMT10C	0.674871
NF2	0.211511	0.0729396	0.189	0.127	1	NF2	0.674667
TMX4	0.211626	0.0885942	0.441	0.353	1	TMX4	0.674431
PIK3CG	0.211662	-0.120602	0.098	0.14	1	PIK3CG	0.674357
PRPF39	0.211662	-0.157667	0.098	0.14	1	PRPF39	0.674357
MAST4	0.211728	0.0859714	0.245	0.18	1	MAST4	0.674223
GOSR1	0.211783	0.0997367	0.322	0.253	1	GOSR1	0.674108
ZNF121	0.211977	-0.0778031	0.07	0.113	1	ZNF121	0.673711
IAH1	0.212069	0.109872	0.455	0.387	1	IAH1	0.673524
MRPL12	0.212217	0.0658963	0.224	0.16	1	MRPL12	0.67322
PNISR	0.212339	0.0501745	0.937	0.94	1	PNISR	0.67297
KAT5	0.212835	-0.0981981	0.112	0.16	1	KAT5	0.671956
ACBD6	0.213154	0.0988129	0.196	0.147	1	ACBD6	0.671307
THRAP3	0.213661	-0.0716636	0.685	0.667	1	THRAP3	0.670274
MTMR4	0.213816	0.0871724	0.231	0.167	1	MTMR4	0.669961
SUZ12	0.21392	0.114204	0.441	0.353	1	SUZ12	0.669748
TXNDC12	0.214278	-0.102647	0.28	0.333	1	TXNDC12	0.669022
RSU1	0.21429	-0.103864	0.126	0.173	1	RSU1	0.668997
MRPL17	0.214498	0.047871	0.252	0.187	1	MRPL17	0.668577
44075	0.214612	0.0995367	0.58	0.5	1	44075	0.668347
FASTK	0.214712	0.0439451	0.238	0.167	1	FASTK	0.668144
PYURF	0.215016	0.113281	0.573	0.48	1	PYURF	0.66753
ERGIC2	0.215146	-0.109893	0.455	0.48	1	ERGIC2	0.667267
DDX59	0.215363	0.0616992	0.14	0.093	1	DDX59	0.66683
CNTRL	0.215507	0.117193	0.434	0.373	1	CNTRL	0.666539
DCAF5	0.21552	-0.135637	0.133	0.18	1	DCAF5	0.666512
ZFAND5	0.215719	0.0704841	0.301	0.233	1	ZFAND5	0.666111
RNF167	0.215799	0.0820509	0.357	0.28	1	RNF167	0.66595
B3GNT2	0.216088	-0.0747384	0.105	0.153	1	B3GNT2	0.66537
DNAJC30	0.216283	-0.0455386	0.091	0.14	1	DNAJC30	0.664978
PDE12	0.216329	-0.108283	0.133	0.18	1	PDE12	0.664886
ATF7	0.216404	0.0568426	0.147	0.1	1	ATF7	0.664734
GPALPP1	0.216551	0.0823369	0.224	0.167	1	GPALPP1	0.66444
DPH5	0.217206	0.0675726	0.14	0.093	1	DPH5	0.663129
TTF1	0.217352	0.0863084	0.266	0.2	1	TTF1	0.662837
PYCR2	0.217436	0.0681761	0.245	0.18	1	PYCR2	0.662669
IL32	0.217739	0.120422	0.965	0.96	1	IL32	0.662064
ZFP90	0.217756	-0.0796123	0.098	0.147	1	ZFP90	0.66203
SEC13	0.217873	0.0813097	0.217	0.16	1	SEC13	0.661796
PTP4A2	0.21793	0.0767176	0.839	0.76	1	PTP4A2	0.661684
C16orf72	0.218048	-0.139667	0.21	0.253	1	C16orf72	0.661448
CRELD2	0.218236	-0.110886	0.252	0.307	1	CRELD2	0.661073
DNAJC21	0.21843	0.0849155	0.517	0.427	1	DNAJC21	0.660689
APC	0.218955	0.0388023	0.175	0.12	1	APC	0.659645
ABCD3	0.219009	0.0192122	0.119	0.073	1	ABCD3	0.659538
FAM3C	0.21906	0.0706044	0.14	0.093	1	FAM3C	0.659437
POLR2L	0.219183	0.0959624	0.566	0.467	1	POLR2L	0.659193
RASAL3	0.219392	-0.046066	0.636	0.72	1	RASAL3	0.658779
COPS8	0.219408	0.0100116	0.203	0.14	1	COPS8	0.658747
SUMO4	0.21948	-0.118529	0.175	0.227	1	SUMO4	0.658605
P3H1	0.219516	0.0448304	0.119	0.073	1	P3H1	0.658533
EBLN3P	0.219558	-0.117805	0.189	0.24	1	EBLN3P	0.65845
INO80D	0.219646	-0.138885	0.105	0.147	1	INO80D	0.658278
SMUG1	0.219693	-0.0781534	0.084	0.127	1	SMUG1	0.658184
USO1	0.219906	-0.130334	0.217	0.267	1	USO1	0.657763
SON	0.219932	0.0565335	0.825	0.787	1	SON	0.657711
EXOC4	0.22009	-0.141142	0.175	0.22	1	EXOC4	0.6574
EPHA1-AS1	0.220433	-0.112875	0.14	0.187	1	EPHA1-AS1	0.656723
OTULIN	0.220642	0.0767245	0.252	0.18	1	OTULIN	0.656313
LINC00342	0.220665	-0.0822214	0.084	0.127	1	LINC00342	0.656266
NUB1	0.220911	-0.0957188	0.371	0.42	1	NUB1	0.655782
CYTH2	0.220937	-0.106045	0.231	0.28	1	CYTH2	0.655731
MAP3K4	0.221115	0.0490768	0.168	0.113	1	MAP3K4	0.655382
LMOD3	0.221243	-0.0659157	0.077	0.12	1	LMOD3	0.65513
TINF2	0.221666	-0.0745358	0.259	0.32	1	TINF2	0.654301
GALT	0.221853	0.074479	0.133	0.087	1	GALT	0.653936
CBWD1	0.221853	0.034968	0.133	0.087	1	CBWD1	0.653936
ATP5PO	0.222116	0.122239	0.643	0.613	1	ATP5PO	0.65342
ARRDC3	0.222351	-0.123204	0.105	0.147	1	ARRDC3	0.65296
CSNK2A2	0.222445	-0.0791343	0.161	0.213	1	CSNK2A2	0.652778
PSPC1	0.222611	0.0618277	0.266	0.2	1	PSPC1	0.652453
FBXO25	0.222802	0.0879481	0.14	0.093	1	FBXO25	0.65208
SH2D1A	0.223024	0.0980051	0.657	0.587	1	SH2D1A	0.651649
LDLRAP1	0.223188	0.13116	0.154	0.107	1	LDLRAP1	0.651329
WDR48	0.223213	-0.0529502	0.161	0.213	1	WDR48	0.65128
STK24	0.223532	0.0999801	0.371	0.3	1	STK24	0.650661
TSC1	0.223786	0.0541665	0.133	0.087	1	TSC1	0.650166
DDX60	0.224037	0.078628	0.175	0.12	1	DDX60	0.64968
UBE2J2	0.224046	0.0765298	0.329	0.247	1	UBE2J2	0.649663
COG1	0.224259	0.0412128	0.126	0.08	1	COG1	0.649249
ARL6IP5	0.224277	-0.0474783	0.86	0.88	1	ARL6IP5	0.649216
BTBD6	0.224487	0.0449536	0.336	0.253	1	BTBD6	0.648808
NAT9	0.224691	0.0344454	0.14	0.093	1	NAT9	0.648415
DHRS7	0.224768	0.113347	0.476	0.393	1	DHRS7	0.648265
SERPINB6	0.224774	0.0807084	0.196	0.14	1	SERPINB6	0.648255
TMEM173	0.224887	0.258536	0.65	0.573	1	TMEM173	0.648035
CD52	0.225061	-0.0886559	0.902	0.893	1	CD52	0.6477
TRAFD1	0.225081	-0.150364	0.105	0.147	1	TRAFD1	0.647662
LEPROT	0.225142	0.0185028	0.336	0.253	1	LEPROT	0.647543
CASK	0.225191	0.0432666	0.301	0.22	1	CASK	0.647449
ATP5F1C	0.2253	0.0957943	0.643	0.533	1	ATP5F1C	0.647238
UCP2	0.225376	0.137088	0.685	0.607	1	UCP2	0.647092
LLPH	0.22544	-0.164845	0.259	0.307	1	LLPH	0.646969
NPHP3	0.225452	0.113468	0.231	0.173	1	NPHP3	0.646945
SSRP1	0.225656	0.0834475	0.294	0.233	1	SSRP1	0.646553
TBC1D7	0.225893	0.083003	0.154	0.107	1	TBC1D7	0.646097
COQ4	0.226019	0.0388856	0.21	0.147	1	COQ4	0.645856
IST1	0.226207	-0.131971	0.21	0.26	1	IST1	0.645494
UBR3	0.226232	-0.0777313	0.091	0.133	1	UBR3	0.645446
SYS1	0.226338	0.0930442	0.203	0.147	1	SYS1	0.645243
FAM111A	0.226483	-0.148263	0.308	0.347	1	FAM111A	0.644965
TET2	0.226922	-0.0387874	0.098	0.147	1	TET2	0.644124
HOOK3	0.226925	0.0829999	0.287	0.22	1	HOOK3	0.644118
RPP38	0.227085	0.0722702	0.217	0.16	1	RPP38	0.643812
YJU2	0.227487	0.032676	0.161	0.107	1	YJU2	0.643043
CS	0.227523	-0.104231	0.07	0.107	1	CS	0.642975
CCNL1	0.227535	0.0609651	0.531	0.447	1	CCNL1	0.642953
SACM1L	0.227689	0.0614777	0.245	0.18	1	SACM1L	0.642657
CD44	0.228164	-0.142596	0.72	0.693	1	CD44	0.641752
WAS	0.228326	0.0408883	0.49	0.387	1	WAS	0.641444
SLC35E1	0.228414	-0.0922713	0.154	0.207	1	SLC35E1	0.641278
RPS29	0.228492	-0.0808461	1	1	1	RPS29	0.641129
PPIE	0.228547	0.0850529	0.308	0.24	1	PPIE	0.641024
REXO1	0.228555	-0.0604137	0.084	0.127	1	REXO1	0.64101
SQLE	0.228622	0.0676433	0.154	0.107	1	SQLE	0.640883
RANGAP1	0.228646	0.101544	0.217	0.16	1	RANGAP1	0.640836
SPTLC1	0.228982	0.0443732	0.168	0.113	1	SPTLC1	0.640199
CYB5A	0.22915	0.0274553	0.217	0.153	1	CYB5A	0.63988
KATNA1	0.229182	0.0336109	0.245	0.18	1	KATNA1	0.63982
PPIF	0.229244	0.0676706	0.231	0.173	1	PPIF	0.639703
CDK5RAP3	0.229245	-0.0831022	0.196	0.253	1	CDK5RAP3	0.639699
R3HCC1L	0.229854	0.0875275	0.161	0.113	1	R3HCC1L	0.638548
DEK	0.229981	0.0707566	0.776	0.74	1	DEK	0.638307
CBR1	0.230126	-0.0435765	0.203	0.273	1	CBR1	0.638033
ADSS	0.230389	0.126579	0.35	0.287	1	ADSS	0.637538
JOSD1	0.230598	0.0285417	0.231	0.16	1	JOSD1	0.637144
ATP6V0A2	0.230673	-0.0660394	0.119	0.167	1	ATP6V0A2	0.637003
QRICH1	0.230943	0.019937	0.175	0.12	1	QRICH1	0.636496
PAXIP1-AS2	0.23109	-0.089356	0.091	0.133	1	PAXIP1-AS2	0.636219
BLMH	0.231108	0.0378595	0.161	0.107	1	BLMH	0.636186
CMTM6	0.231466	0.0732327	0.608	0.52	1	CMTM6	0.635513
SEC61B	0.231507	-0.066181	0.783	0.82	1	SEC61B	0.635436
DNASE1	0.231606	-0.0834152	0.154	0.207	1	DNASE1	0.635251
MT-ND5	0.231705	-0.0544248	0.986	0.98	1	MT-ND5	0.635065
DNMT1	0.231717	-0.144955	0.343	0.4	1	DNMT1	0.635042
AQP3	0.231857	0.0354147	0.294	0.233	1	AQP3	0.63478
SDHAF3	0.232296	0.0709802	0.154	0.107	1	SDHAF3	0.633958
DGCR6L	0.232626	0.0175258	0.357	0.267	1	DGCR6L	0.633342
MFF	0.232785	0.0551088	0.392	0.307	1	MFF	0.633045
LPIN1	0.233124	-0.0875184	0.154	0.213	1	LPIN1	0.632414
TOX4	0.233273	0.11779	0.406	0.34	1	TOX4	0.632136
RPGR	0.233386	0.0601115	0.126	0.08	1	RPGR	0.631925
SLC25A3	0.2334	0.105513	0.832	0.793	1	SLC25A3	0.631899
AHR	0.233499	0.0615518	0.147	0.1	1	AHR	0.631714
ATP1A1	0.233615	0.0697304	0.35	0.273	1	ATP1A1	0.631499
PABPN1	0.233729	0.0690879	0.448	0.353	1	PABPN1	0.631288
MPPE1	0.233886	-0.15528	0.119	0.16	1	MPPE1	0.630995
U2SURP	0.233974	-0.160398	0.531	0.553	1	U2SURP	0.630833
MIA2	0.234032	0.0753295	0.308	0.233	1	MIA2	0.630726
PNKP	0.234095	0.0300473	0.434	0.34	1	PNKP	0.630608
ZNF880	0.23445	0.0484069	0.147	0.1	1	ZNF880	0.62995
FLYWCH2	0.234888	-0.0743237	0.189	0.247	1	FLYWCH2	0.62914
PTPRN2	0.234919	-0.111447	0.098	0.14	1	PTPRN2	0.629081
TTC1	0.235	0.057627	0.406	0.313	1	TTC1	0.628931
DNAJB2	0.235281	0.0575228	0.14	0.093	1	DNAJB2	0.628414
APOPT1	0.235388	0.0543865	0.238	0.173	1	APOPT1	0.628217
FIBP	0.235393	0.100068	0.336	0.267	1	FIBP	0.628207
NSMCE3	0.235518	0.0758631	0.378	0.313	1	NSMCE3	0.627976
VSIR	0.235578	0.0842239	0.259	0.2	1	VSIR	0.627865
PARN	0.235642	-0.121126	0.091	0.127	1	PARN	0.627747
SCYL3	0.235702	0.0534727	0.105	0.067	1	SCYL3	0.627637
SMAD4	0.235975	0.0578399	0.182	0.127	1	SMAD4	0.627134
JPX	0.236041	0.0646174	0.531	0.427	1	JPX	0.627013
UIMC1	0.236132	0.127187	0.189	0.14	1	UIMC1	0.626845
SRP68	0.236161	0.0938156	0.238	0.173	1	SRP68	0.626792
NSMAF	0.236359	0.0436273	0.147	0.1	1	NSMAF	0.626427
DCPS	0.236452	0.062148	0.21	0.153	1	DCPS	0.626257
PSMA2	0.236515	0.0437291	0.448	0.367	1	PSMA2	0.626141
PPP1CB	0.236568	0.112153	0.552	0.467	1	PPP1CB	0.626044
MAEA	0.23657	0.0550211	0.217	0.16	1	MAEA	0.62604
SUMO1	0.236577	-0.0620613	0.741	0.74	1	SUMO1	0.626028
STAG1	0.23671	-0.0940866	0.203	0.26	1	STAG1	0.625783
LYPLA1	0.236892	0.0908247	0.343	0.273	1	LYPLA1	0.625449
CEBPZ	0.237033	-0.102152	0.252	0.307	1	CEBPZ	0.625191
G3BP1	0.237097	-0.114172	0.455	0.52	1	G3BP1	0.625073
ST3GAL2	0.237109	0.0947578	0.161	0.113	1	ST3GAL2	0.625053
SIAH2	0.237287	0.108678	0.252	0.193	1	SIAH2	0.624727
NPDC1	0.237341	0.0770622	0.329	0.253	1	NPDC1	0.624628
RTCA	0.237755	-0.106801	0.238	0.28	1	RTCA	0.623871
CIB1	0.237794	0.0364559	0.874	0.88	1	CIB1	0.623798
CHFR	0.23783	-0.0908584	0.14	0.187	1	CHFR	0.623734
ZDHHC5	0.237999	0.0409505	0.175	0.12	1	ZDHHC5	0.623425
HBS1L	0.238076	0.0494392	0.287	0.213	1	HBS1L	0.623285
SNRPG	0.23829	0.09951	0.622	0.573	1	SNRPG	0.622894
CCNI	0.238741	0.0275637	0.965	0.927	1	CCNI	0.622072
CUL1	0.238799	0.0922819	0.28	0.22	1	CUL1	0.621968
PRKRA	0.238985	-0.10387	0.133	0.18	1	PRKRA	0.621629
VPS13C	0.239118	0.144293	0.434	0.387	1	VPS13C	0.621388
PCSK7	0.239323	-0.0975905	0.608	0.633	1	PCSK7	0.621015
HUWE1	0.239569	0.0524924	0.413	0.327	1	HUWE1	0.620569
ATG2B	0.239594	-0.0869213	0.07	0.107	1	ATG2B	0.620523
RPS2	0.239605	0.0640582	1	1	1	RPS2	0.620504
DNM2	0.239894	0.0440205	0.315	0.24	1	DNM2	0.61998
SLC25A37	0.239963	-0.103326	0.077	0.113	1	SLC25A37	0.619855
EXOG	0.240127	-0.170021	0.147	0.187	1	EXOG	0.61956
NDUFB9	0.240313	0.0796887	0.517	0.433	1	NDUFB9	0.619223
PRELID3B	0.240415	0.106609	0.245	0.187	1	PRELID3B	0.619038
ZNF217	0.240427	0.0949919	0.364	0.293	1	ZNF217	0.619017
FAM222B	0.240664	0.0419647	0.126	0.08	1	FAM222B	0.618588
PGRMC2	0.240683	0.038607	0.175	0.12	1	PGRMC2	0.618554
RAB29	0.240739	0.0229692	0.245	0.173	1	RAB29	0.618454
EIF1B	0.240988	-0.116531	0.538	0.6	1	EIF1B	0.618004
CEP104	0.241181	0.0648966	0.147	0.1	1	CEP104	0.617657
ARHGAP12	0.241181	0.0560707	0.147	0.1	1	ARHGAP12	0.617657
SCAF1	0.241204	0.0863702	0.14	0.093	1	SCAF1	0.617616
VCP	0.241295	0.109314	0.664	0.607	1	VCP	0.617451
EIF3F	0.241367	0.0998561	0.818	0.807	1	EIF3F	0.617323
FXN	0.241372	0.0704517	0.105	0.067	1	FXN	0.617312
LITAF	0.241373	0.0980828	0.378	0.3	1	LITAF	0.617311
ERI3	0.241734	0.043408	0.133	0.087	1	ERI3	0.616662
PLEKHA3	0.241957	0.0872681	0.245	0.187	1	PLEKHA3	0.616262
REEP5	0.242045	0.0994735	0.608	0.54	1	REEP5	0.616103
ROCK1	0.242068	0.132305	0.664	0.647	1	ROCK1	0.616062
RAN	0.242184	0.103728	0.881	0.827	1	RAN	0.615855
NR2F6	0.242518	0.0635531	0.105	0.067	1	NR2F6	0.615256
ACTB	0.242929	0.0633739	1	1	1	ACTB	0.614521
CTNNB1	0.24328	-0.102628	0.21	0.267	1	CTNNB1	0.613893
FAAP20	0.243493	0.0947585	0.434	0.36	1	FAAP20	0.613514
MRPL9	0.244034	0.0695628	0.329	0.26	1	MRPL9	0.61255
DPAGT1	0.244094	-0.0853448	0.07	0.107	1	DPAGT1	0.612443
ZNF253	0.244318	-0.110255	0.077	0.113	1	ZNF253	0.612044
DDX17	0.24435	-0.059139	0.867	0.927	1	DDX17	0.611988
PPP3CC	0.244356	0.0978081	0.175	0.127	1	PPP3CC	0.611978
WDFY1	0.244821	0.0797363	0.105	0.067	1	WDFY1	0.611152
CALM1	0.244878	-0.108855	0.965	0.98	1	CALM1	0.611051
MDM1	0.245085	-0.0879744	0.091	0.133	1	MDM1	0.610683
ISOC2	0.245205	0.0475009	0.175	0.12	1	ISOC2	0.61047
PELP1	0.24521	0.0515733	0.14	0.093	1	PELP1	0.610461
RPL18	0.245723	0.0539295	1	1	1	RPL18	0.609554
SLC52A2	0.246166	0.0275268	0.217	0.153	1	SLC52A2	0.608772
SMURF2	0.246318	-0.0481736	0.077	0.12	1	SMURF2	0.608504
MLST8	0.246517	-0.10373	0.077	0.113	1	MLST8	0.608154
ZNF264	0.246569	0.0299416	0.182	0.127	1	ZNF264	0.608061
EAPP	0.246884	0.0278267	0.524	0.413	1	EAPP	0.607507
ZBED5	0.247171	0.0335963	0.238	0.173	1	ZBED5	0.607002
GPATCH11	0.247704	0.111506	0.14	0.1	1	GPATCH11	0.606067
LASP1	0.247721	0.0890561	0.385	0.313	1	LASP1	0.606037
RNGTT	0.247859	0.0701896	0.203	0.147	1	RNGTT	0.605795
VASP	0.247894	-0.122933	0.399	0.447	1	VASP	0.605734
NFATC2	0.247929	0.0902532	0.406	0.34	1	NFATC2	0.605672
MRPL15	0.247972	0.0842495	0.175	0.127	1	MRPL15	0.605598
AAMDC	0.248101	0.0247141	0.126	0.08	1	AAMDC	0.605372
HCFC2	0.248101	-0.123991	0.084	0.12	1	HCFC2	0.605372
EPS15	0.2484	-0.0550539	0.35	0.433	1	EPS15	0.604848
ATXN1	0.248581	0.117391	0.434	0.36	1	ATXN1	0.604532
UFSP2	0.248714	0.02927	0.203	0.147	1	UFSP2	0.604299
SLC38A2	0.248982	0.0898046	0.294	0.233	1	SLC38A2	0.603832
PHF21A	0.249021	0.0598797	0.238	0.18	1	PHF21A	0.603765
RNF6	0.249041	0.0920228	0.203	0.153	1	RNF6	0.603729
FMC1	0.249041	-0.0801439	0.154	0.2	1	FMC1	0.603729
CREBZF	0.249222	0.130548	0.434	0.36	1	CREBZF	0.603413
RNF115	0.249283	0.0722607	0.385	0.307	1	RNF115	0.603307
CDC42EP3	0.249332	0.0422228	0.301	0.22	1	CDC42EP3	0.603223
FUBP3	0.249349	0.0455729	0.154	0.107	1	FUBP3	0.603193
KIF22	0.249515	0.10953	0.161	0.12	1	KIF22	0.602903
EVA1B	0.249691	0.0826893	0.28	0.213	1	EVA1B	0.602596
NAB1	0.249768	0.103706	0.245	0.187	1	NAB1	0.602463
TMED9	0.249782	-0.0859373	0.385	0.433	1	TMED9	0.602439
PPP4R1	0.250033	0.0700837	0.147	0.1	1	PPP4R1	0.602002
CKS1B	0.250033	0.0605197	0.147	0.1	1	CKS1B	0.602002
DESI1	0.25005	0.0217105	0.203	0.14	1	DESI1	0.601973
ASF1A	0.250052	-0.120277	0.322	0.373	1	ASF1A	0.60197
ABCB8	0.250224	0.0978513	0.133	0.093	1	ABCB8	0.60167
NDUFB8	0.250434	0.06055	0.734	0.653	1	NDUFB8	0.601307
WRN	0.250644	0.0502833	0.105	0.067	1	WRN	0.600943
IFT20	0.250794	0.0723381	0.301	0.233	1	IFT20	0.600683
N4BP1	0.250815	0.0537807	0.441	0.367	1	N4BP1	0.600647
OCIAD1	0.251055	0.118839	0.629	0.607	1	OCIAD1	0.600231
MED8	0.251197	0.0526382	0.28	0.213	1	MED8	0.599986
UROS	0.251502	0.0810175	0.322	0.253	1	UROS	0.599458
ATF7IP	0.251585	0.114461	0.448	0.367	1	ATF7IP	0.599315
PCBD2	0.251619	0.0697252	0.112	0.073	1	PCBD2	0.599257
AC008124.1	0.251815	-0.0551158	0.084	0.127	1	AC008124.1	0.598919
IQGAP1	0.252014	0.0576682	0.65	0.593	1	IQGAP1	0.598576
MICAL2	0.252156	-0.0905219	0.161	0.213	1	MICAL2	0.598331
MGME1	0.252241	-0.0447682	0.147	0.093	1	MGME1	0.598185
ICE2	0.25269	-0.12554	0.203	0.247	1	ICE2	0.597412
SNHG7	0.252805	-0.15968	0.329	0.373	1	SNHG7	0.597214
SIRPG	0.253022	0.0493007	0.203	0.147	1	SIRPG	0.596841
TRERF1	0.253103	0.0588225	0.273	0.207	1	TRERF1	0.596703
GPBP1	0.253108	-0.0761319	0.713	0.74	1	GPBP1	0.596693
HAUS3	0.253205	-0.100887	0.112	0.153	1	HAUS3	0.596528
RBM23	0.253427	0.0286202	0.252	0.187	1	RBM23	0.596147
MSH6	0.25344	0.112088	0.168	0.12	1	MSH6	0.596125
CLPTM1	0.253478	0.0225235	0.224	0.16	1	CLPTM1	0.596061
RPL41	0.253667	-0.0314718	1	1	1	RPL41	0.595736
MRPS12	0.253837	-0.130135	0.385	0.427	1	MRPS12	0.595444
PRKX	0.253894	-0.120418	0.336	0.38	1	PRKX	0.595347
AC005224.3	0.2539	0.129794	0.112	0.073	1	AC005224.3	0.595337
KDM6A	0.25404	0.0278832	0.147	0.1	1	KDM6A	0.595098
LRCH3	0.254137	0.104263	0.259	0.207	1	LRCH3	0.594932
THAP4	0.254184	0.0538578	0.105	0.067	1	THAP4	0.594852
PARP4	0.254216	0.035007	0.322	0.247	1	PARP4	0.594797
FAM126B	0.254248	-0.102991	0.091	0.127	1	FAM126B	0.594742
RTRAF	0.254374	0.0583184	0.727	0.673	1	RTRAF	0.594527
WIPF1	0.254599	0.0969612	0.79	0.807	1	WIPF1	0.594144
VPS26B	0.254731	0.0217283	0.182	0.127	1	VPS26B	0.593919
SNRK	0.255017	0.0321293	0.252	0.187	1	SNRK	0.593432
MRPL45	0.255311	-0.103638	0.091	0.127	1	MRPL45	0.59293
HOOK2	0.255372	0.0595407	0.105	0.067	1	HOOK2	0.592827
SKI	0.255602	-0.08975	0.07	0.107	1	SKI	0.592436
PRH1	0.256014	0.0628467	0.294	0.227	1	PRH1	0.591736
RBM5	0.256104	0.0552768	0.448	0.367	1	RBM5	0.591584
RAB3GAP2	0.256821	-0.0856796	0.168	0.22	1	RAB3GAP2	0.59037
MED16	0.257133	-0.0960184	0.161	0.207	1	MED16	0.589841
DHX16	0.257223	0.0691961	0.168	0.12	1	DHX16	0.58969
RPS7	0.257415	-0.0379068	1	1	1	RPS7	0.589366
GLE1	0.257446	0.0283592	0.133	0.087	1	GLE1	0.589313
ARHGAP25	0.25758	0.0671166	0.406	0.327	1	ARHGAP25	0.589089
FBXL16	0.257759	0.0470605	0.105	0.067	1	FBXL16	0.588787
EIF3J	0.257912	0.0488107	0.392	0.32	1	EIF3J	0.588528
CHUK	0.257948	-0.0740167	0.07	0.107	1	CHUK	0.588468
SRPK2	0.258126	-0.0648767	0.406	0.453	1	SRPK2	0.588168
KLHDC2	0.258213	-0.107733	0.259	0.307	1	KLHDC2	0.588021
TRPM7	0.258282	0.0603418	0.21	0.153	1	TRPM7	0.587906
ATP7A	0.258505	0.034136	0.112	0.073	1	ATP7A	0.58753
PUM3	0.258646	0.0639625	0.182	0.133	1	PUM3	0.587295
TAF1	0.25888	0.0326784	0.196	0.14	1	TAF1	0.586901
PSIP1	0.259133	-0.0694253	0.706	0.687	1	PSIP1	0.586478
HIST1H1E	0.259192	0.0557188	0.154	0.107	1	HIST1H1E	0.586379
AAK1	0.259197	-0.121027	0.622	0.627	1	AAK1	0.58637
PPHLN1	0.259315	0.0227939	0.51	0.427	1	PPHLN1	0.586172
LAT	0.259495	-0.116276	0.797	0.84	1	LAT	0.585871
NDE1	0.259543	-0.086855	0.175	0.227	1	NDE1	0.585791
TSPAN3	0.259711	-0.0785848	0.105	0.147	1	TSPAN3	0.585509
RPL7	0.259741	0.064137	0.993	0.993	1	RPL7	0.58546
GOLT1B	0.259776	0.0515035	0.196	0.14	1	GOLT1B	0.5854
LPGAT1	0.259839	0.0546772	0.161	0.113	1	LPGAT1	0.585296
ECI1	0.260543	0.0867034	0.287	0.227	1	ECI1	0.584121
ACOT13	0.260601	0.0741715	0.196	0.147	1	ACOT13	0.584024
ABI3	0.260672	-0.0310893	0.133	0.087	1	ABI3	0.583906
KLHL2	0.260723	-0.0833471	0.105	0.147	1	KLHL2	0.583821
PWP1	0.260845	-0.0845567	0.217	0.26	1	PWP1	0.583618
CALHM2	0.260888	-0.0512107	0.154	0.207	1	CALHM2	0.583546
RPL36AL	0.260907	-0.0507003	0.979	0.98	1	RPL36AL	0.583514
PNRC2	0.260918	-0.0702271	0.448	0.5	1	PNRC2	0.583496
MTMR14	0.260978	-0.0902702	0.119	0.16	1	MTMR14	0.583396
SSH1	0.261192	-0.125048	0.112	0.147	1	SSH1	0.583039
ZBTB24	0.261236	0.0432403	0.273	0.207	1	ZBTB24	0.582967
YY1	0.261293	0.0817479	0.685	0.54	1	YY1	0.582873
HPS1	0.261629	0.125737	0.224	0.18	1	HPS1	0.582314
TMEM248	0.261672	-0.143006	0.336	0.38	1	TMEM248	0.582243
TM9SF3	0.261672	0.0694055	0.399	0.32	1	TM9SF3	0.582243
CEP170	0.261674	-0.0965431	0.133	0.173	1	CEP170	0.58224
RTP4	0.261753	-0.117287	0.091	0.127	1	RTP4	0.582108
GLRX3	0.262003	0.0382672	0.406	0.32	1	GLRX3	0.581694
SECISBP2	0.262113	-0.0400325	0.357	0.413	1	SECISBP2	0.581512
IQSEC1	0.262115	0.0976809	0.126	0.087	1	IQSEC1	0.581508
ZNF326	0.262256	-0.083524	0.196	0.24	1	ZNF326	0.581275
B3GALT4	0.262682	0.0734301	0.231	0.18	1	B3GALT4	0.58057
TAF2	0.262755	-0.112092	0.105	0.147	1	TAF2	0.580449
RGS19	0.262844	0.01724	0.329	0.253	1	RGS19	0.580302
TMEM59	0.262957	0.106562	0.713	0.647	1	TMEM59	0.580115
CLOCK	0.262971	0.0836967	0.168	0.12	1	CLOCK	0.580093
ZBTB14	0.263168	0.0547772	0.112	0.073	1	ZBTB14	0.579766
CHMP4B	0.263341	0.0908605	0.301	0.24	1	CHMP4B	0.579482
TRAPPC11	0.263768	0.0799239	0.126	0.087	1	TRAPPC11	0.578778
HYOU1	0.263878	-0.0215134	0.07	0.107	1	HYOU1	0.578596
COG4	0.263884	-0.0574422	0.189	0.247	1	COG4	0.578587
CD81	0.263974	0.068879	0.755	0.7	1	CD81	0.578439
POLR2I	0.264055	0.16708	0.385	0.34	1	POLR2I	0.578306
STAT5B	0.264071	0.0835445	0.406	0.313	1	STAT5B	0.578279
RUVBL2	0.26425	-0.0155691	0.147	0.1	1	RUVBL2	0.577984
CCND2	0.264272	-0.125248	0.406	0.44	1	CCND2	0.577948
LIN7C	0.264299	-0.113888	0.14	0.18	1	LIN7C	0.577904
ENDOG	0.264487	0.0364171	0.182	0.127	1	ENDOG	0.577595
ARL2BP	0.264683	-0.104919	0.266	0.313	1	ARL2BP	0.577274
HNRNPA1P48	0.264873	0.0740126	0.126	0.087	1	HNRNPA1P48	0.576962
CCDC117	0.265181	-0.0982162	0.077	0.113	1	CCDC117	0.576458
EPC2	0.265327	-0.112706	0.126	0.167	1	EPC2	0.576218
MRPL33	0.265511	0.141102	0.503	0.427	1	MRPL33	0.575918
RPLP0	0.265618	0.0749106	0.986	0.987	1	RPLP0	0.575743
PLGRKT	0.265792	0.111623	0.357	0.287	1	PLGRKT	0.575458
KIAA0100	0.265878	-0.0716295	0.119	0.167	1	KIAA0100	0.575318
RPL23A	0.265915	-0.04988	1	1	1	RPL23A	0.575258
MED21	0.266065	-0.058483	0.133	0.18	1	MED21	0.575012
C22orf46	0.266093	-0.0542212	0.091	0.133	1	C22orf46	0.574967
TMEM14A	0.266148	0.0407091	0.224	0.167	1	TMEM14A	0.574877
SLAMF1	0.266193	-0.128983	0.287	0.327	1	SLAMF1	0.574804
AC017002.3	0.26624	0.0734278	0.154	0.107	1	AC017002.3	0.574726
SC5D	0.266277	-0.0632694	0.07	0.107	1	SC5D	0.574667
CLDND1	0.266333	0.0645444	0.58	0.487	1	CLDND1	0.574575
LRCH4	0.266458	0.0964306	0.203	0.153	1	LRCH4	0.574371
TIGIT	0.266829	0.13786	0.888	0.807	1	TIGIT	0.573766
SSR2	0.266911	-0.0721722	0.769	0.807	1	SSR2	0.573633
NUS1	0.26696	0.0681204	0.119	0.08	1	NUS1	0.573554
ZNF480	0.267039	0.0588071	0.21	0.153	1	ZNF480	0.573425
FBXO22	0.267086	0.0328112	0.329	0.24	1	FBXO22	0.573349
NUPL2	0.267532	0.0228297	0.238	0.167	1	NUPL2	0.572624
RPL34	0.267697	-0.0359291	1	1	1	RPL34	0.572356
CCDC124	0.267717	0.0779458	0.231	0.18	1	CCDC124	0.572324
GSTK1	0.267777	-0.103593	0.692	0.727	1	GSTK1	0.572227
ARPC3	0.267982	-0.0546768	0.965	0.96	1	ARPC3	0.571894
PRCC	0.268278	-0.152886	0.112	0.147	1	PRCC	0.571415
ZNF593	0.268435	0.0790952	0.21	0.16	1	ZNF593	0.57116
OSBPL9	0.268528	0.0566451	0.175	0.127	1	OSBPL9	0.571011
PYCARD	0.268588	-0.124043	0.462	0.487	1	PYCARD	0.570913
IDE	0.26869	-0.0632672	0.07	0.107	1	IDE	0.570749
C8orf76	0.268809	0.0615773	0.231	0.173	1	C8orf76	0.570556
RPS4X	0.26889	0.0761495	1	1	1	RPS4X	0.570425
CAMK1D	0.268917	-0.0952323	0.105	0.147	1	CAMK1D	0.570382
ELP2	0.269035	-0.0858819	0.245	0.293	1	ELP2	0.570191
TTC32	0.269078	0.0316596	0.112	0.073	1	TTC32	0.570121
SNW1	0.269243	-0.0108864	0.427	0.507	1	SNW1	0.569855
HAPLN3	0.269317	0.142465	0.189	0.147	1	HAPLN3	0.569736
MBD1	0.269348	-0.0436314	0.091	0.133	1	MBD1	0.569687
ZC3H15	0.269362	-0.0961831	0.573	0.6	1	ZC3H15	0.569663
ZNF414	0.26941	-0.102204	0.091	0.127	1	ZNF414	0.569587
HAT1	0.269662	-0.0466991	0.175	0.227	1	HAT1	0.56918
NAA60	0.269953	-0.0806321	0.105	0.147	1	NAA60	0.568711
CFAP97	0.270063	0.109647	0.245	0.187	1	CFAP97	0.568535
TMEM14B	0.270151	-0.0673275	0.545	0.607	1	TMEM14B	0.568393
UBN1	0.270344	0.078654	0.315	0.247	1	UBN1	0.568083
PYGO2	0.270433	0.0842786	0.14	0.1	1	PYGO2	0.56794
HDGF	0.270474	-0.0694481	0.308	0.367	1	HDGF	0.567875
ENY2	0.270489	0.0799595	0.566	0.48	1	ENY2	0.56785
PIN4	0.270555	-0.106498	0.322	0.36	1	PIN4	0.567745
TRIM38	0.270894	0.0613631	0.476	0.373	1	TRIM38	0.5672
RABAC1	0.270948	-0.0694807	0.734	0.733	1	RABAC1	0.567113
ATF2	0.271046	-0.102367	0.161	0.2	1	ATF2	0.566958
FAM102A	0.271186	0.0650964	0.378	0.3	1	FAM102A	0.566732
CASP3	0.271295	-0.103253	0.196	0.24	1	CASP3	0.566558
TAF9B	0.271468	0.0512404	0.112	0.073	1	TAF9B	0.566282
MRGBP	0.271564	-0.128081	0.105	0.14	1	MRGBP	0.566128
SRSF3	0.271605	0.0699589	0.818	0.753	1	SRSF3	0.566062
CUL5	0.271717	0.0565716	0.315	0.24	1	CUL5	0.565884
PSMA6	0.271727	0.0896217	0.189	0.14	1	PSMA6	0.565867
POGZ	0.272178	-0.100625	0.231	0.273	1	POGZ	0.565147
NUDT2	0.272201	0.0489037	0.182	0.133	1	NUDT2	0.565111
MAP3K11	0.273053	-0.108679	0.133	0.173	1	MAP3K11	0.563753
CYTH1	0.273101	0.0601812	0.608	0.507	1	CYTH1	0.563677
ZFP36L2	0.273323	-0.0996401	0.888	0.88	1	ZFP36L2	0.563324
ATP6AP1	0.273412	0.0327911	0.245	0.187	1	ATP6AP1	0.563182
PHTF1	0.273477	0.0206395	0.14	0.093	1	PHTF1	0.56308
UBXN6	0.27363	0.074809	0.182	0.133	1	UBXN6	0.562836
SYF2	0.27369	-0.030715	0.566	0.64	1	SYF2	0.562741
MRPL51	0.273726	-0.0897867	0.65	0.673	1	MRPL51	0.562684
STIM2	0.27376	-0.136855	0.231	0.273	1	STIM2	0.562631
DAPP1	0.273826	-0.109578	0.189	0.233	1	DAPP1	0.562526
MBNL1	0.274031	-0.0993634	0.741	0.74	1	MBNL1	0.5622
KIDINS220	0.274136	-0.1208	0.203	0.24	1	KIDINS220	0.562035
[truncated: 3,751 more rows]

## Sheet: S3B-PD1+ IgG vs. PD-L1
Table S3B: Differential Analysis of CD4+PD1+FOXP3- T cells IgG vs. PD-L1
	p_val	avg_logFC	pct.1	pct.2	p_val_adj	Gene_ID	logP
KIZ	0.000138993	0.266051	0.196	0.047	1	KIZ	3.85701
ZNF557	0.000189706	0.19176	0.159	0.027	1	ZNF557	3.72192
DROSHA	0.000315868	0.162187	0.103	0.007	1	DROSHA	3.50049
GABARAP	0.000327147	0.158905	0.121	0.013	1	GABARAP	3.48526
SMIM29	0.000676201	0.270533	0.28	0.113	1	SMIM29	3.16992
RNASEL	0.000695456	0.230686	0.178	0.047	1	RNASEL	3.15773
TWISTNB	0.000882613	0.213614	0.262	0.1	1	TWISTNB	3.05423
CARS	0.00129926	-0.284731	0.065	0.207	1	CARS	2.88631
MFSD14B	0.00158725	0.175252	0.224	0.08	1	MFSD14B	2.79935
MANEA	0.00161276	-0.231116	0.019	0.127	1	MANEA	2.79243
RCC2	0.00172252	0.173862	0.196	0.067	1	RCC2	2.76384
MTM1	0.00184464	-0.194287	0.019	0.127	1	MTM1	2.73409
IRF2BP2	0.00245215	0.388606	0.495	0.313	1	IRF2BP2	2.61045
PYROXD1	0.00263419	0.216517	0.327	0.16	1	PYROXD1	2.57935
TERF1	0.00266532	0.302668	0.449	0.273	1	TERF1	2.57425
UBXN2B	0.00308386	0.172049	0.159	0.047	1	UBXN2B	2.51091
NOC3L	0.00346621	0.210978	0.28	0.133	1	NOC3L	2.46015
SLAIN2	0.00401962	-0.270989	0.131	0.273	1	SLAIN2	2.39581
CEPT1	0.00412282	-0.234569	0.056	0.173	1	CEPT1	2.38481
ECHS1	0.00435429	-0.26998	0.346	0.507	1	ECHS1	2.36108
SELENOK	0.00435737	0.282897	0.636	0.467	1	SELENOK	2.36078
KCNC1	0.00436919	0.12743	0.103	0.02	1	KCNC1	2.3596
BIRC6	0.00459423	0.211501	0.533	0.347	1	BIRC6	2.33779
NAA35	0.00471865	-0.130283	0.019	0.113	1	NAA35	2.32618
COPB2	0.00497648	-0.227718	0.29	0.453	1	COPB2	2.30308
ZDHHC16	0.0052267	0.157792	0.159	0.053	1	ZDHHC16	2.28177
DNAJB14	0.00546058	0.217264	0.579	0.387	1	DNAJB14	2.26276
TRIM26	0.0055625	0.196838	0.206	0.087	1	TRIM26	2.25473
AC097376.2	0.00558794	0.124893	0.15	0.047	1	AC097376.2	2.25275
ARL4C	0.00561951	0.274228	0.804	0.707	1	ARL4C	2.2503
RMC1	0.00563335	0.174787	0.121	0.033	1	RMC1	2.24923
CRELD2	0.00567805	-0.255143	0.159	0.307	1	CRELD2	2.2458
DDIT4	0.00607701	0.25303	0.71	0.533	1	DDIT4	2.21631
IFT57	0.00607997	0.207469	0.224	0.1	1	IFT57	2.2161
NUP54	0.00609391	0.190421	0.308	0.16	1	NUP54	2.2151
FBLN5	0.00626149	0.173298	0.121	0.033	1	FBLN5	2.20332
TRA2A	0.00630944	0.199121	0.383	0.22	1	TRA2A	2.20001
KDM5C	0.00634668	0.177844	0.234	0.1	1	KDM5C	2.19745
FAM98B	0.00644272	-0.230796	0.112	0.247	1	FAM98B	2.19093
SEC23B	0.00645015	0.18562	0.206	0.087	1	SEC23B	2.19043
EIF3E	0.00660505	0.19398	0.879	0.76	1	EIF3E	2.18012
BCL2L13	0.00663707	0.115539	0.121	0.033	1	BCL2L13	2.17802
F8A1	0.0068074	0.15379	0.168	0.06	1	F8A1	2.16702
ERO1A	0.00695176	-0.296248	0.196	0.34	1	ERO1A	2.15791
TRIM25	0.00707188	0.146517	0.187	0.073	1	TRIM25	2.15047
TMEM14B	0.0071148	-0.222605	0.439	0.607	1	TMEM14B	2.14784
HSPB1	0.00715951	0.202435	0.402	0.233	1	HSPB1	2.14512
TRIOBP	0.0075047	0.16003	0.318	0.167	1	TRIOBP	2.12467
USP32	0.00753554	0.121089	0.121	0.033	1	USP32	2.12289
ERCC1	0.00766462	0.246547	0.318	0.187	1	ERCC1	2.11551
TSR3	0.00783138	0.229502	0.43	0.28	1	TSR3	2.10616
SSSCA1	0.00788311	0.182826	0.28	0.14	1	SSSCA1	2.1033
KCNK6	0.00810675	0.185301	0.215	0.093	1	KCNK6	2.09115
H3F3B	0.00811802	0.169504	1	0.987	1	H3F3B	2.09055
MRPS7	0.00830249	0.241118	0.477	0.32	1	MRPS7	2.08079
TSTD1	0.00866419	0.183801	0.85	0.673	1	TSTD1	2.06227
ATP5MG	0.00870393	0.153948	0.907	0.873	1	ATP5MG	2.06028
KEAP1	0.00882031	0.188565	0.234	0.113	1	KEAP1	2.05452
CHD2	0.008847	-0.298067	0.318	0.487	1	CHD2	2.0532
TRAF5	0.00888123	-0.26673	0.168	0.293	1	TRAF5	2.05153
ARNTL	0.00905699	0.245179	0.252	0.133	1	ARNTL	2.04302
DMAP1	0.00919034	0.159375	0.252	0.12	1	DMAP1	2.03667
RIC3	0.00947372	0.213721	0.252	0.127	1	RIC3	2.02348
43899	0.00983584	0.14205	0.15	0.053	1	43899	2.00719
DCAF7	0.00989983	0.18677	0.383	0.213	1	DCAF7	2.00437
SMAD4	0.0100504	0.19697	0.252	0.127	1	SMAD4	1.99782
BTG1	0.0101291	-0.232037	0.953	0.987	1	BTG1	1.99443
MLST8	0.0104715	-0.18628	0.028	0.113	1	MLST8	1.97999
PIGX	0.0105032	0.211905	0.252	0.127	1	PIGX	1.97868
DSTYK	0.0105946	-0.253031	0.093	0.207	1	DSTYK	1.97492
FBRSL1	0.0106453	0.164617	0.168	0.067	1	FBRSL1	1.97284
RPP30	0.0110534	0.14035	0.28	0.147	1	RPP30	1.9565
LPGAT1	0.0113492	0.225776	0.224	0.113	1	LPGAT1	1.94504
TENT4B	0.0113943	-0.195938	0.037	0.127	1	TENT4B	1.94331
ESYT2	0.0116016	0.245506	0.252	0.133	1	ESYT2	1.93548
WIPI1	0.0117419	0.169254	0.121	0.04	1	WIPI1	1.93026
PHACTR4	0.0117896	0.169715	0.187	0.08	1	PHACTR4	1.9285
EIF3C	0.0118693	0.136829	0.103	0.027	1	EIF3C	1.92557
SBF1	0.0119818	-0.210912	0.075	0.18	1	SBF1	1.92148
GLOD4	0.0121995	0.224048	0.439	0.273	1	GLOD4	1.91366
FBXL6	0.0122399	0.145068	0.112	0.033	1	FBXL6	1.91222
MAML1	0.0125052	-0.137321	0.028	0.113	1	MAML1	1.90291
CAMK2G	0.0129745	0.219672	0.206	0.1	1	CAMK2G	1.88691
RABAC1	0.0133189	-0.208139	0.645	0.733	1	RABAC1	1.87553
TRAPPC2L	0.0133722	0.210062	0.449	0.287	1	TRAPPC2L	1.8738
RPL22L1	0.0134135	0.255021	0.458	0.307	1	RPL22L1	1.87246
NUP155	0.0135268	0.123139	0.112	0.033	1	NUP155	1.8688
BLOC1S1	0.0135337	0.206225	0.72	0.567	1	BLOC1S1	1.86858
NUP160	0.0135501	-0.175043	0.084	0.193	1	NUP160	1.86806
CNPPD1	0.0137816	0.137746	0.243	0.12	1	CNPPD1	1.8607
RPL23	0.0141149	0.187137	0.944	0.92	1	RPL23	1.85032
TIMM17A	0.0142806	0.224055	0.355	0.213	1	TIMM17A	1.84525
FAM228B	0.0143025	0.153818	0.14	0.053	1	FAM228B	1.84459
NUP88	0.0144787	0.172861	0.178	0.08	1	NUP88	1.83927
CENPF	0.0149264	0.214516	0.196	0.093	1	CENPF	1.82604
HDAC1	0.0150086	0.225556	0.542	0.367	1	HDAC1	1.82366
MED10	0.015028	0.225981	0.458	0.313	1	MED10	1.8231
IFFO2	0.0151093	0.159256	0.121	0.04	1	IFFO2	1.82076
IFT43	0.0152664	-0.157408	0.028	0.107	1	IFT43	1.81626
CAMK4	0.0153518	0.202872	0.402	0.267	1	CAMK4	1.81384
RGP1	0.0153592	0.164473	0.252	0.127	1	RGP1	1.81363
ZNF354B	0.0155966	0.100184	0.112	0.033	1	ZNF354B	1.80697
KANSL2	0.0156728	0.105008	0.178	0.073	1	KANSL2	1.80485
TSPOAP1-AS1	0.0158241	0.165297	0.234	0.12	1	TSPOAP1-AS1	1.80068
ADD3	0.0159417	0.219846	0.533	0.36	1	ADD3	1.79747
CD69	0.0160572	-0.335267	0.121	0.233	1	CD69	1.79433
LRCH4	0.0161653	0.214344	0.271	0.153	1	LRCH4	1.79142
SCML4	0.0162426	0.123987	0.252	0.127	1	SCML4	1.78934
BAK1	0.0164853	0.174511	0.243	0.127	1	BAK1	1.7829
MEMO1	0.0167245	0.155196	0.187	0.087	1	MEMO1	1.77665
LRWD1	0.0167966	0.125618	0.14	0.053	1	LRWD1	1.77478
ITPRIPL1	0.0168278	0.150316	0.15	0.06	1	ITPRIPL1	1.77397
MRPL27	0.0169663	0.187819	0.402	0.253	1	MRPL27	1.77041
SPOP	0.0169984	0.213875	0.364	0.227	1	SPOP	1.76959
NOL7	0.017062	-0.142909	0.467	0.6	1	NOL7	1.76797
GMPR2	0.0170763	0.149685	0.308	0.167	1	GMPR2	1.76761
GLCCI1	0.0171406	0.240594	0.374	0.24	1	GLCCI1	1.76597
RTN4	0.017154	0.221497	0.579	0.46	1	RTN4	1.76564
BCL6	0.0174827	-0.123997	0.047	0.14	1	BCL6	1.75739
SAFB	0.0174888	0.1808	0.477	0.327	1	SAFB	1.75724
NUP43	0.0175192	-0.127213	0.075	0.18	1	NUP43	1.75648
AKT2	0.0175301	-0.175774	0.112	0.227	1	AKT2	1.75622
PIP4K2A	0.0176058	0.1875	0.402	0.26	1	PIP4K2A	1.75434
HERC1	0.0176549	-0.181221	0.224	0.367	1	HERC1	1.75314
MRPL34	0.0176971	-0.224563	0.439	0.52	1	MRPL34	1.7521
EPHA1-AS1	0.0178483	-0.192581	0.084	0.187	1	EPHA1-AS1	1.7484
PQLC3	0.0181647	0.173335	0.299	0.167	1	PQLC3	1.74077
SSR2	0.0184949	-0.190472	0.682	0.807	1	SSR2	1.73295
CNN2	0.0185048	0.255285	0.495	0.367	1	CNN2	1.73272
STK16	0.0185213	0.134019	0.262	0.133	1	STK16	1.73233
GLG1	0.0186126	-0.187434	0.271	0.413	1	GLG1	1.73019
TRIP4	0.018805	0.169622	0.215	0.107	1	TRIP4	1.72573
ERGIC2	0.0190474	-0.215629	0.374	0.48	1	ERGIC2	1.72017
MYNN	0.0191403	0.110152	0.168	0.073	1	MYNN	1.71805
REEP3	0.0192159	-0.218086	0.103	0.207	1	REEP3	1.71634
ALG8	0.0193109	0.148034	0.224	0.113	1	ALG8	1.7142
ZNF507	0.0194606	0.157643	0.168	0.073	1	ZNF507	1.71084
AP002387.2	0.0195816	0.267364	0.346	0.227	1	AP002387.2	1.70815
HDAC3	0.0195868	0.206937	0.28	0.16	1	HDAC3	1.70804
KARS	0.0207524	-0.221874	0.121	0.233	1	KARS	1.68293
CEP164	0.0207889	0.142923	0.168	0.073	1	CEP164	1.68217
DENND2D	0.0209386	0.261129	0.486	0.353	1	DENND2D	1.67905
ANAPC11	0.0209392	0.207723	0.598	0.447	1	ANAPC11	1.67904
SRGAP2C	0.0213643	0.129148	0.159	0.067	1	SRGAP2C	1.67031
MRE11	0.0216189	0.21743	0.187	0.093	1	MRE11	1.66517
TLNRD1	0.0216723	0.140581	0.187	0.087	1	TLNRD1	1.6641
ARRDC5	0.0219894	0.146503	0.103	0.033	1	ARRDC5	1.65779
YLPM1	0.0220283	0.151924	0.234	0.12	1	YLPM1	1.65702
JMJD6	0.0220949	0.153267	0.224	0.113	1	JMJD6	1.65571
ZC2HC1A	0.0220984	0.150636	0.178	0.08	1	ZC2HC1A	1.65564
AK6	0.0224997	0.130446	0.271	0.147	1	AK6	1.64782
AGFG1	0.0227886	0.254855	0.421	0.28	1	AGFG1	1.64228
MIS18A	0.0229484	0.133903	0.103	0.033	1	MIS18A	1.63925
LACTB	0.0230845	0.203837	0.178	0.087	1	LACTB	1.63668
RPS9	0.0232043	0.121206	1	0.993	1	RPS9	1.63443
RNF34	0.0233382	0.15632	0.327	0.193	1	RNF34	1.63193
MAN2A1	0.0234599	-0.260465	0.121	0.22	1	MAN2A1	1.62967
SARS	0.0234975	-0.196377	0.168	0.28	1	SARS	1.62898
GPBP1	0.023515	-0.137367	0.71	0.74	1	GPBP1	1.62866
MDM1	0.0238418	-0.146843	0.047	0.133	1	MDM1	1.62266
G3BP2	0.0239577	-0.292598	0.467	0.56	1	G3BP2	1.62055
NELFB	0.0246174	0.175327	0.252	0.14	1	NELFB	1.60876
TMEM263	0.0250481	0.126953	0.224	0.113	1	TMEM263	1.60123
KLF13	0.0250656	0.214886	0.486	0.367	1	KLF13	1.60092
CNP	0.0250657	-0.192944	0.121	0.22	1	CNP	1.60092
NR1H2	0.0251751	0.156662	0.327	0.193	1	NR1H2	1.59903
ARRDC3	0.0253359	-0.144219	0.056	0.147	1	ARRDC3	1.59626
MRPL2	0.0253419	-0.166308	0.121	0.227	1	MRPL2	1.59616
TOLLIP	0.0255427	0.163099	0.159	0.073	1	TOLLIP	1.59273
FBXW2	0.0255452	-0.244718	0.178	0.28	1	FBXW2	1.59269
CLPP	0.0258875	-0.179076	0.336	0.467	1	CLPP	1.58691
BTN2A1	0.0259908	0.168882	0.206	0.107	1	BTN2A1	1.58518
CRTC3	0.0260122	-0.232386	0.318	0.42	1	CRTC3	1.58482
CHD6	0.0260146	-0.170959	0.14	0.253	1	CHD6	1.58478
PISD	0.0260227	0.12352	0.112	0.04	1	PISD	1.58465
HIBADH	0.0260468	0.0934387	0.103	0.033	1	HIBADH	1.58425
TTN-AS1	0.0261822	0.194895	0.15	0.067	1	TTN-AS1	1.58199
UBE3B	0.0262081	-0.167394	0.056	0.14	1	UBE3B	1.58156
USP8	0.026419	0.109623	0.477	0.3	1	USP8	1.57808
PGRMC2	0.0264399	0.162287	0.224	0.12	1	PGRMC2	1.57774
CCDC66	0.0264603	0.191319	0.486	0.34	1	CCDC66	1.5774
CYB5B	0.0265656	0.200211	0.43	0.287	1	CYB5B	1.57568
SELENOF	0.026566	-0.167098	0.579	0.667	1	SELENOF	1.57567
SACS	0.0266883	0.17524	0.187	0.093	1	SACS	1.57368
SNHG9	0.0266924	0.188066	0.196	0.1	1	SNHG9	1.57361
PRPF18	0.026797	0.153167	0.29	0.167	1	PRPF18	1.57191
ILVBL	0.0268061	0.118794	0.112	0.04	1	ILVBL	1.57177
NTHL1	0.0268619	-0.168464	0.056	0.14	1	NTHL1	1.57086
COPE	0.0269387	-0.166181	0.645	0.793	1	COPE	1.56962
ZBTB7A	0.0271582	0.146259	0.439	0.307	1	ZBTB7A	1.5661
C6orf106	0.0272849	0.134501	0.178	0.08	1	C6orf106	1.56408
SMS	0.0273557	0.12916	0.383	0.233	1	SMS	1.56295
MT-CO2	0.0274881	0.0697324	1	1	1	MT-CO2	1.56085
IAH1	0.0275011	0.258644	0.514	0.387	1	IAH1	1.56065
RBM14	0.0275354	-0.160625	0.047	0.127	1	RBM14	1.56011
POU2F2	0.0276157	0.155997	0.28	0.16	1	POU2F2	1.55884
DTHD1	0.0277272	0.123534	0.103	0.033	1	DTHD1	1.55709
TSG101	0.027889	-0.212475	0.224	0.333	1	TSG101	1.55457
PTPRC	0.0280917	0.12227	1	1	1	PTPRC	1.55142
SPTLC1	0.0281599	0.162076	0.215	0.113	1	SPTLC1	1.55037
MAPK3	0.0283133	0.192331	0.187	0.093	1	MAPK3	1.54801
MRPS16	0.0283887	-0.187526	0.29	0.4	1	MRPS16	1.54685
SEC61A1	0.028503	-0.130859	0.084	0.187	1	SEC61A1	1.54511
ZNF766	0.0286372	0.201092	0.355	0.22	1	ZNF766	1.54307
ARL16	0.0287652	-0.218669	0.224	0.327	1	ARL16	1.54113
DNAJC18	0.0289954	0.0864448	0.112	0.04	1	DNAJC18	1.53767
PIGC	0.0290911	0.152897	0.252	0.14	1	PIGC	1.53624
TMBIM4	0.0291536	-0.187736	0.757	0.86	1	TMBIM4	1.53531
EIF6	0.0293651	0.115257	0.458	0.3	1	EIF6	1.53217
HELQ	0.0294094	0.150585	0.15	0.067	1	HELQ	1.53151
ZDHHC24	0.0295745	-0.173454	0.159	0.273	1	ZDHHC24	1.52908
ING4	0.0295745	-0.188	0.159	0.273	1	ING4	1.52908
RFWD3	0.0296107	-0.134964	0.037	0.113	1	RFWD3	1.52855
FNBP4	0.0298277	-0.209285	0.402	0.513	1	FNBP4	1.52538
TMEM123	0.0298573	0.151671	0.748	0.647	1	TMEM123	1.52495
CKS2	0.03002	-0.173484	0.168	0.273	1	CKS2	1.52259
VPS25	0.0301005	0.175614	0.29	0.18	1	VPS25	1.52143
PFKL	0.0301956	-0.217103	0.168	0.273	1	PFKL	1.52006
SUPT7L	0.0303346	0.14278	0.206	0.107	1	SUPT7L	1.51806
NABP2	0.0303346	-0.179011	0.093	0.187	1	NABP2	1.51806
CARD19	0.0303736	-0.229348	0.075	0.16	1	CARD19	1.5175
EIF2S2	0.030385	-0.230298	0.495	0.593	1	EIF2S2	1.51734
CGRRF1	0.0304433	-0.157969	0.075	0.167	1	CGRRF1	1.51651
TM2D1	0.0305758	-0.204974	0.206	0.313	1	TM2D1	1.51462
C12orf57	0.0306914	-0.165643	0.757	0.833	1	C12orf57	1.51298
ZYG11B	0.0311881	0.15249	0.206	0.107	1	ZYG11B	1.50601
OSER1	0.0315281	0.137636	0.178	0.087	1	OSER1	1.5013
SENP2	0.0315643	-0.11721	0.047	0.127	1	SENP2	1.5008
LRP10	0.0315771	0.157334	0.551	0.413	1	LRP10	1.50063
RASA1	0.03166	0.139153	0.15	0.067	1	RASA1	1.49949
EXOSC8	0.031735	-0.195164	0.224	0.333	1	EXOSC8	1.49846
YWHAZ	0.0317382	0.110257	0.879	0.78	1	YWHAZ	1.49842
PRF1	0.0318371	-0.200804	0.112	0.213	1	PRF1	1.49707
CAPN10	0.0321019	0.130285	0.14	0.06	1	CAPN10	1.49347
KCNQ1OT1	0.0322376	0.304395	0.243	0.14	1	KCNQ1OT1	1.49164
UROD	0.0322386	0.146946	0.178	0.087	1	UROD	1.49162
ZNF226	0.0324328	0.133881	0.29	0.167	1	ZNF226	1.48902
PGLS	0.032475	0.153995	0.589	0.447	1	PGLS	1.48845
KPNA2	0.0324958	-0.17794	0.131	0.233	1	KPNA2	1.48817
BARD1	0.0325146	0.196007	0.206	0.113	1	BARD1	1.48792
RPRD2	0.0325834	-0.193396	0.131	0.227	1	RPRD2	1.487
SP110	0.0326759	-0.212071	0.449	0.587	1	SP110	1.48577
DNAJC21	0.0326886	0.181605	0.561	0.427	1	DNAJC21	1.4856
CDIP1	0.032782	0.107109	0.121	0.047	1	CDIP1	1.48436
CLSTN1	0.0331013	0.163004	0.243	0.133	1	CLSTN1	1.48015
CELF1	0.0331621	0.13673	0.355	0.22	1	CELF1	1.47936
ABCF3	0.0334964	0.131853	0.159	0.073	1	ABCF3	1.475
MTCH1	0.0337183	-0.175655	0.308	0.427	1	MTCH1	1.47213
ZNF701	0.0338211	-0.200321	0.103	0.193	1	ZNF701	1.47081
KMT2E	0.0344356	0.162014	0.794	0.613	1	KMT2E	1.46299
MED28	0.0344412	-0.252133	0.374	0.447	1	MED28	1.46292
STX18	0.0344421	0.117549	0.187	0.093	1	STX18	1.46291
WDR77	0.0344532	-0.159336	0.075	0.16	1	WDR77	1.46277
PRPF31	0.0344666	-0.248621	0.29	0.387	1	PRPF31	1.4626
AP003716.1	0.0345397	0.131505	0.131	0.053	1	AP003716.1	1.46168
TXLNA	0.0349358	0.175289	0.299	0.187	1	TXLNA	1.45673
LANCL1	0.0349369	0.106992	0.121	0.047	1	LANCL1	1.45672
SRBD1	0.0350228	-0.128206	0.065	0.153	1	SRBD1	1.45565
RBM26	0.0351754	0.20153	0.402	0.273	1	RBM26	1.45376
GSTK1	0.0352457	-0.209661	0.692	0.727	1	GSTK1	1.45289
RAB1B	0.0353175	0.118164	0.336	0.213	1	RAB1B	1.45201
SIAH2	0.0355792	0.148074	0.318	0.193	1	SIAH2	1.4488
ADAR	0.0356439	0.18225	0.579	0.44	1	ADAR	1.44802
MED31	0.03575	-0.14212	0.112	0.213	1	MED31	1.44672
ANGEL2	0.0360142	-0.12845	0.093	0.187	1	ANGEL2	1.44353
MOB2	0.0360927	0.129601	0.299	0.18	1	MOB2	1.44258
UBE2I	0.036166	0.180351	0.757	0.64	1	UBE2I	1.4417
ETNK1	0.0361763	-0.21533	0.187	0.287	1	ETNK1	1.44158
NDUFA7	0.0362217	-0.139933	0.037	0.107	1	NDUFA7	1.44103
ATP8B2	0.0363114	0.171524	0.234	0.133	1	ATP8B2	1.43996
DGCR6L	0.0365935	0.128249	0.421	0.267	1	DGCR6L	1.4366
SMC1A	0.0366589	0.178878	0.486	0.333	1	SMC1A	1.43582
CFAP20	0.0370511	-0.0977055	0.075	0.167	1	CFAP20	1.4312
SASH3	0.0370775	-0.210751	0.234	0.333	1	SASH3	1.43089
TAF10	0.037112	0.191356	0.57	0.42	1	TAF10	1.43049
TIMM44	0.0371299	0.135698	0.103	0.04	1	TIMM44	1.43028
HIF1A	0.0372876	0.207721	0.561	0.44	1	HIF1A	1.42844
CXXC1	0.0376072	0.0922876	0.178	0.087	1	CXXC1	1.42473
ARMC10	0.0378283	0.127891	0.271	0.16	1	ARMC10	1.42218
FZD3	0.0378284	0.236488	0.121	0.053	1	FZD3	1.42218
NUTM2B-AS1	0.0378758	0.137651	0.505	0.367	1	NUTM2B-AS1	1.42164
FKBP11	0.0379499	-0.208218	0.159	0.26	1	FKBP11	1.42079
STMN3	0.037993	0.161139	0.252	0.147	1	STMN3	1.4203
NKAP	0.0380011	0.0831368	0.383	0.24	1	NKAP	1.4202
IER3IP1	0.0382329	0.148724	0.346	0.22	1	IER3IP1	1.41756
MCM6	0.0384163	0.177846	0.262	0.153	1	MCM6	1.41548
SPOCK2	0.0384169	0.1061	0.935	0.867	1	SPOCK2	1.41548
RSPRY1	0.038519	0.115596	0.196	0.1	1	RSPRY1	1.41432
CRYL1	0.0387012	-0.136224	0.056	0.133	1	CRYL1	1.41228
SDE2	0.038813	0.150088	0.178	0.093	1	SDE2	1.41102
PLIN2	0.0388248	0.164732	0.505	0.36	1	PLIN2	1.41089
NIPSNAP1	0.0388452	0.0666829	0.196	0.093	1	NIPSNAP1	1.41066
NDUFA10	0.0392621	0.148611	0.43	0.287	1	NDUFA10	1.40603
SEC61G	0.039283	-0.194601	0.561	0.64	1	SEC61G	1.4058
DIDO1	0.0394577	-0.263055	0.234	0.32	1	DIDO1	1.40387
INPP4A	0.0395341	0.14872	0.299	0.187	1	INPP4A	1.40303
UBR5	0.0396972	0.151281	0.402	0.26	1	UBR5	1.40124
UTP25	0.0399643	-0.149158	0.037	0.107	1	UTP25	1.39833
GADD45A	0.0402835	0.145457	0.262	0.153	1	GADD45A	1.39487
SMARCA4	0.040317	0.177211	0.308	0.187	1	SMARCA4	1.39451
HSD17B7	0.0404201	0.0687137	0.178	0.087	1	HSD17B7	1.3934
PARP6	0.0404845	0.144305	0.103	0.04	1	PARP6	1.39271
SSBP3	0.0407109	0.0975288	0.178	0.087	1	SSBP3	1.39029
ZBED5	0.0408534	0.112639	0.29	0.173	1	ZBED5	1.38877
ANGPT2	0.0409289	0.0641772	0.159	0.073	1	ANGPT2	1.38797
SUPT5H	0.0409891	-0.152342	0.178	0.28	1	SUPT5H	1.38733
SEC61B	0.0411962	-0.150041	0.757	0.82	1	SEC61B	1.38514
MOCS2	0.0412865	-0.138902	0.065	0.147	1	MOCS2	1.38419
SEC62	0.0413363	0.158526	0.645	0.52	1	SEC62	1.38367
RPL31	0.041409	-0.158978	0.869	0.86	1	RPL31	1.38291
CDIPT	0.0418999	-0.186983	0.131	0.227	1	CDIPT	1.37779
NKAPD1	0.0420169	0.105592	0.206	0.107	1	NKAPD1	1.37658
GRWD1	0.0428506	0.154373	0.178	0.093	1	GRWD1	1.36804
INPP1	0.0428523	-0.157721	0.065	0.147	1	INPP1	1.36803
DERL2	0.0429118	-0.170212	0.318	0.433	1	DERL2	1.36742
EXOC8	0.043046	-0.129553	0.047	0.12	1	EXOC8	1.36607
AP3S2	0.0432659	-0.128647	0.037	0.107	1	AP3S2	1.36385
FCHSD2	0.0432682	0.121989	0.103	0.04	1	FCHSD2	1.36383
PTGES2	0.04346	-0.20682	0.159	0.267	1	PTGES2	1.36191
ST3GAL2	0.0435876	0.142529	0.206	0.113	1	ST3GAL2	1.36064
GATAD2B	0.043751	0.142477	0.28	0.173	1	GATAD2B	1.35901
RABGGTA	0.0441984	0.131187	0.121	0.053	1	RABGGTA	1.35459
CAT	0.0443731	-0.256863	0.187	0.273	1	CAT	1.35288
SREBF2	0.0443995	0.151384	0.168	0.087	1	SREBF2	1.35262
EIF4A3	0.0446374	-0.184528	0.215	0.32	1	EIF4A3	1.3503
EIF4E2	0.044733	0.13189	0.383	0.26	1	EIF4E2	1.34937
SUGP2	0.0447586	0.145825	0.299	0.18	1	SUGP2	1.34912
AC009403.1	0.0447973	-0.135003	0.065	0.147	1	AC009403.1	1.34875
GAK	0.0448807	0.157473	0.299	0.187	1	GAK	1.34794
MCUR1	0.0451286	0.150447	0.159	0.08	1	MCUR1	1.34555
TRAPPC2B	0.0452766	-0.149944	0.093	0.18	1	TRAPPC2B	1.34413
ERGIC3	0.0453005	0.143278	0.364	0.233	1	ERGIC3	1.3439
ECI1	0.0453306	0.149282	0.346	0.227	1	ECI1	1.34361
ATP6V1E1	0.0453732	0.146355	0.299	0.187	1	ATP6V1E1	1.3432
DIS3L2	0.0455255	-0.182491	0.056	0.127	1	DIS3L2	1.34174
GTF2A2	0.0457146	-0.185926	0.477	0.553	1	GTF2A2	1.33994
CD70	0.0459577	-0.117216	0.056	0.133	1	CD70	1.33764
CRNKL1	0.0460698	0.0909723	0.206	0.107	1	CRNKL1	1.33658
CCDC69	0.0461163	0.122827	0.327	0.207	1	CCDC69	1.33615
DHRS3	0.0463444	-0.175664	0.075	0.153	1	DHRS3	1.334
CYLD	0.0463887	-0.172484	0.71	0.78	1	CYLD	1.33359
RB1CC1	0.0466837	-0.119876	0.271	0.393	1	RB1CC1	1.33084
NAA38	0.0467107	-0.245183	0.364	0.44	1	NAA38	1.33058
APOBEC3G	0.0467679	-0.259281	0.486	0.567	1	APOBEC3G	1.33005
ZNF75A	0.0468829	0.139579	0.29	0.18	1	ZNF75A	1.32899
PXN	0.0470834	0.0994553	0.103	0.04	1	PXN	1.32713
MRPL39	0.0471716	-0.139099	0.084	0.167	1	MRPL39	1.32632
CLEC2B	0.0472736	-0.163021	0.477	0.6	1	CLEC2B	1.32538
CYP4V2	0.047344	0.197523	0.15	0.073	1	CYP4V2	1.32474
SYS1	0.0473627	0.15316	0.252	0.147	1	SYS1	1.32456
JAK2	0.0475242	0.0918226	0.103	0.04	1	JAK2	1.32308
BCKDK	0.0475289	0.120899	0.14	0.067	1	BCKDK	1.32304
HSPA9	0.0478062	-0.146454	0.28	0.38	1	HSPA9	1.32052
FAM120B	0.0479771	0.119944	0.112	0.047	1	FAM120B	1.31897
RPL18	0.0480129	0.101215	1	1	1	RPL18	1.31864
NDUFA3	0.0481154	0.173512	0.523	0.407	1	NDUFA3	1.31772
ACP2	0.0490321	0.140642	0.14	0.067	1	ACP2	1.30952
COX7A2L	0.0491809	-0.134562	0.579	0.647	1	COX7A2L	1.3082
PCYT2	0.0492731	0.140052	0.206	0.113	1	PCYT2	1.30739
TCEA2	0.0493225	0.121583	0.103	0.04	1	TCEA2	1.30695
YIPF3	0.0493985	0.196282	0.355	0.247	1	YIPF3	1.30629
IKBKE	0.049414	0.0998045	0.14	0.067	1	IKBKE	1.30615
COG4	0.04943	-0.178282	0.159	0.247	1	COG4	1.30601
DLST	0.049714	-0.139012	0.065	0.14	1	DLST	1.30352
CYB5R4	0.0498059	0.222404	0.178	0.1	1	CYB5R4	1.30272
SNX18	0.0498078	0.186546	0.252	0.16	1	SNX18	1.3027
DALRD3	0.0498505	0.141093	0.262	0.16	1	DALRD3	1.30233
AC027644.3	0.050351	0.112081	0.159	0.08	1	AC027644.3	1.29799
PLEKHA3	0.0505532	0.105273	0.299	0.187	1	PLEKHA3	1.29625
FHOD1	0.0505764	0.107839	0.112	0.047	1	FHOD1	1.29605
HSPA14.1	0.0509137	0.178484	0.206	0.12	1	HSPA14.1	1.29316
TNRC6C	0.0509445	0.129193	0.178	0.093	1	TNRC6C	1.2929
RALA	0.0511003	-0.210256	0.421	0.527	1	RALA	1.29158
ZNF576	0.0517558	-0.118341	0.093	0.173	1	ZNF576	1.28604
TOB2	0.051851	0.151365	0.243	0.147	1	TOB2	1.28524
UBR1	0.0518688	0.127308	0.215	0.12	1	UBR1	1.28509
EIF2AK2	0.0519871	-0.238027	0.215	0.307	1	EIF2AK2	1.2841
PSMD9	0.0520961	0.176341	0.187	0.107	1	PSMD9	1.28319
TCP1	0.0524119	-0.155262	0.308	0.413	1	TCP1	1.28057
AC013264.1	0.0525361	0.19413	0.206	0.12	1	AC013264.1	1.27954
EEF1B2	0.0526018	0.155558	0.972	0.947	1	EEF1B2	1.279
PIK3CG	0.0527163	-0.148403	0.065	0.14	1	PIK3CG	1.27806
ARHGEF2	0.0527381	0.0805041	0.271	0.16	1	ARHGEF2	1.27788
ANAPC4	0.0527625	-0.135966	0.056	0.127	1	ANAPC4	1.27767
TEFM	0.053423	0.141703	0.215	0.127	1	TEFM	1.27227
PITPNA-AS1	0.0534901	-0.157868	0.065	0.14	1	PITPNA-AS1	1.27173
FBXO34	0.0535233	0.195979	0.299	0.193	1	FBXO34	1.27146
TUBA4A	0.0536385	-0.251986	0.561	0.627	1	TUBA4A	1.27052
ETV7	0.0540485	-0.149794	0.327	0.427	1	ETV7	1.26722
ATG14	0.0542248	0.104795	0.112	0.047	1	ATG14	1.2658
ZFPM1	0.0544713	0.152837	0.196	0.113	1	ZFPM1	1.26383
SFXN3	0.0545511	0.0878148	0.15	0.073	1	SFXN3	1.2632
MRPS12	0.0546809	-0.235105	0.346	0.427	1	MRPS12	1.26216
PSMC6	0.0547859	0.170898	0.523	0.407	1	PSMC6	1.26133
EIF2A	0.0548114	0.134426	0.336	0.227	1	EIF2A	1.26113
TM7SF2	0.0549805	0.109614	0.121	0.053	1	TM7SF2	1.25979
ABCA5	0.0550597	0.109426	0.131	0.06	1	ABCA5	1.25917
GLRX	0.0550967	0.196228	0.561	0.44	1	GLRX	1.25887
MPZL3	0.0551705	0.0948427	0.112	0.047	1	MPZL3	1.25829
TNPO3	0.0554454	-0.178772	0.084	0.167	1	TNPO3	1.25613
SEPHS2	0.0554869	0.139474	0.43	0.287	1	SEPHS2	1.25581
CDK11A	0.055555	-0.226639	0.206	0.293	1	CDK11A	1.25528
SP140	0.0556617	-0.200405	0.346	0.427	1	SP140	1.25444
AKAP5	0.0556732	0.150616	0.159	0.08	1	AKAP5	1.25435
SUGT1	0.0558399	-0.134425	0.336	0.44	1	SUGT1	1.25306
VPS13D	0.0558687	-0.147645	0.065	0.14	1	VPS13D	1.25283
SMARCC1	0.0560436	-0.225494	0.308	0.393	1	SMARCC1	1.25147
WSB1	0.0560966	0.112235	0.57	0.42	1	WSB1	1.25106
PNRC2	0.0562085	-0.130402	0.393	0.5	1	PNRC2	1.2502
EMC3	0.0563388	0.158195	0.411	0.287	1	EMC3	1.24919
FLOT1	0.0566067	0.18468	0.206	0.12	1	FLOT1	1.24713
ANKRD35	0.056784	0.10938	0.168	0.087	1	ANKRD35	1.24577
RNF6	0.0568043	0.176141	0.243	0.153	1	RNF6	1.24562
AC245297.3	0.0568136	0.143446	0.43	0.307	1	AC245297.3	1.24555
DNAJA2	0.0569493	-0.156316	0.505	0.633	1	DNAJA2	1.24451
ZNF43	0.0571587	0.118107	0.14	0.067	1	ZNF43	1.24292
PPT1	0.0571648	-0.216983	0.196	0.273	1	PPT1	1.24287
DENND4A	0.0572873	0.0966887	0.121	0.053	1	DENND4A	1.24194
ZNF131	0.0573695	-0.116782	0.252	0.367	1	ZNF131	1.24132
BCAS3	0.0575925	0.116197	0.187	0.1	1	BCAS3	1.23963
KAT5	0.0579201	-0.16373	0.084	0.16	1	KAT5	1.23717
PMM2	0.0582491	-0.140093	0.056	0.127	1	PMM2	1.23471
OTUD6B-AS1	0.0583506	-0.181678	0.252	0.353	1	OTUD6B-AS1	1.23395
PPP2R5D	0.0584693	0.108706	0.14	0.067	1	PPP2R5D	1.23307
GTPBP8	0.0585143	0.126135	0.215	0.127	1	GTPBP8	1.23274
CPM	0.058883	0.106577	0.29	0.187	1	CPM	1.23001
MAP1LC3B	0.0591219	0.140543	0.692	0.56	1	MAP1LC3B	1.22825
KBTBD2	0.059172	0.0798241	0.168	0.087	1	KBTBD2	1.22788
RHOT2	0.0592535	0.122555	0.234	0.14	1	RHOT2	1.22729
PAFAH1B2	0.0594255	-0.214623	0.187	0.273	1	PAFAH1B2	1.22603
G3BP1	0.059483	-0.184749	0.43	0.52	1	G3BP1	1.22561
LPAR2	0.0596013	-0.110585	0.065	0.14	1	LPAR2	1.22474
DFFA	0.0601919	-0.117874	0.093	0.18	1	DFFA	1.22046
KBTBD7	0.0602907	-0.140742	0.047	0.113	1	KBTBD7	1.21975
NBN	0.0603014	-0.159423	0.159	0.253	1	NBN	1.21967
MVP	0.0604158	0.166554	0.495	0.38	1	MVP	1.21885
DDX1	0.0604561	-0.146197	0.093	0.173	1	DDX1	1.21856
RAB27A	0.0606336	-0.173907	0.495	0.547	1	RAB27A	1.21729
NMRAL1	0.0606629	0.122576	0.187	0.1	1	NMRAL1	1.21708
HSP90AA1	0.0607514	-0.112709	0.935	0.947	1	HSP90AA1	1.21644
CPD	0.0607716	-0.0947775	0.047	0.113	1	CPD	1.2163
BIN3	0.0609942	0.160507	0.215	0.133	1	BIN3	1.21471
CNST	0.0610247	0.132049	0.215	0.127	1	CNST	1.21449
GNB1	0.0613967	-0.179646	0.327	0.453	1	GNB1	1.21185
UBE2J1	0.0614915	-0.162332	0.084	0.16	1	UBE2J1	1.21118
RBM17	0.0616842	0.154304	0.467	0.36	1	RBM17	1.20983
NIPA1	0.061743	-0.123146	0.047	0.113	1	NIPA1	1.20941
PLSCR1	0.061983	0.070193	0.29	0.18	1	PLSCR1	1.20773
NSMCE2	0.0620532	0.121263	0.28	0.18	1	NSMCE2	1.20724
PAM	0.0620628	-0.105397	0.075	0.153	1	PAM	1.20717
CD59	0.0621111	0.19904	0.355	0.247	1	CD59	1.20683
EBLN2	0.0622014	0.0710186	0.15	0.073	1	EBLN2	1.2062
PRDX5	0.0623696	0.151422	0.673	0.553	1	PRDX5	1.20503
LPCAT4	0.0624394	-0.088809	0.103	0.193	1	LPCAT4	1.20454
ATP5MC3	0.0626008	-0.0998976	0.757	0.82	1	ATP5MC3	1.20342
GADD45G	0.0627191	0.173984	0.318	0.22	1	GADD45G	1.2026
SNAPC1	0.0627218	-0.148304	0.084	0.16	1	SNAPC1	1.20258
UBA5	0.0627722	-0.150306	0.075	0.147	1	UBA5	1.20223
PPP2R1A	0.0628698	0.175019	0.243	0.153	1	PPP2R1A	1.20156
ARHGDIB	0.0628768	-0.124568	0.907	0.953	1	ARHGDIB	1.20151
TSPAN14	0.0628974	0.153177	0.486	0.36	1	TSPAN14	1.20137
LSM4	0.0629913	-0.141674	0.374	0.473	1	LSM4	1.20072
IMPDH1	0.0630942	0.115983	0.224	0.133	1	IMPDH1	1.20001
TTC1	0.0632972	0.187913	0.421	0.313	1	TTC1	1.19862
NFKB2	0.0635893	0.14659	0.355	0.233	1	NFKB2	1.19662
SINHCAF	0.0638419	-0.138979	0.29	0.4	1	SINHCAF	1.19489
ANAPC16	0.0638543	0.153208	0.85	0.8	1	ANAPC16	1.19481
CLK1	0.0642993	0.177463	0.43	0.313	1	CLK1	1.19179
KCMF1	0.0643315	0.0942498	0.308	0.193	1	KCMF1	1.19158
ZNF428	0.0644822	0.116204	0.421	0.28	1	ZNF428	1.19056
RPL36	0.0644969	-0.0748875	0.991	0.993	1	RPL36	1.19046
PLEC	0.0646135	0.163881	0.364	0.253	1	PLEC	1.18968
CHST7	0.0649595	0.155259	0.159	0.087	1	CHST7	1.18736
GIMAP7	0.0653409	-0.0841694	0.916	0.967	1	GIMAP7	1.18481
UNC50	0.0653509	0.135385	0.29	0.187	1	UNC50	1.18475
C1QBP	0.0655193	0.130913	0.542	0.42	1	C1QBP	1.18363
LINC00847	0.0656444	-0.0945461	0.056	0.127	1	LINC00847	1.1828
DOHH	0.0656444	-0.0976451	0.056	0.127	1	DOHH	1.1828
ERI1	0.0657578	0.147694	0.121	0.06	1	ERI1	1.18205
DERA	0.0657586	-0.154433	0.112	0.193	1	DERA	1.18205
CCT6A	0.0657634	-0.17784	0.505	0.58	1	CCT6A	1.18202
FLNA	0.0658273	0.223098	0.449	0.347	1	FLNA	1.18159
NUDT14	0.0659331	0.123148	0.206	0.12	1	NUDT14	1.1809
ABTB1	0.0661483	-0.188067	0.252	0.333	1	ABTB1	1.17948
OGT	0.0666273	-0.22853	0.411	0.507	1	OGT	1.17635
PPP1R12C	0.0667472	0.193975	0.15	0.08	1	PPP1R12C	1.17557
RIPK1	0.066936	0.124609	0.234	0.147	1	RIPK1	1.17434
F2R	0.0672786	-0.164591	0.159	0.247	1	F2R	1.17212
LMAN1	0.0674973	-0.188219	0.346	0.453	1	LMAN1	1.17071
RBM38	0.0684955	0.128665	0.327	0.22	1	RBM38	1.16434
CCDC92	0.068665	0.0686999	0.159	0.08	1	CCDC92	1.16326
UBE2N	0.0687425	-0.171109	0.486	0.587	1	UBE2N	1.16277
ZNF141	0.0687536	0.174734	0.215	0.12	1	ZNF141	1.1627
SMU1	0.0689335	-0.159621	0.215	0.307	1	SMU1	1.16157
GMFB	0.0691724	0.104451	0.206	0.12	1	GMFB	1.16007
CCDC7	0.0693673	-0.141418	0.056	0.12	1	CCDC7	1.15885
BTN3A3	0.0695318	0.184774	0.252	0.16	1	BTN3A3	1.15782
TBC1D20	0.0696114	0.163419	0.224	0.133	1	TBC1D20	1.15732
SLC2A3	0.0697646	0.0549435	0.383	0.253	1	SLC2A3	1.15636
RNASEH1	0.0698649	0.106595	0.196	0.113	1	RNASEH1	1.15574
DENND4C	0.0700881	0.165999	0.15	0.08	1	DENND4C	1.15436
PRDM1	0.070223	-0.206582	0.196	0.287	1	PRDM1	1.15352
UQCRFS1	0.0702918	-0.163523	0.477	0.587	1	UQCRFS1	1.1531
OTUD4	0.0703867	-0.111705	0.103	0.187	1	OTUD4	1.15251
PCMTD2	0.0704664	-0.193047	0.075	0.147	1	PCMTD2	1.15202
CSNK1G3	0.0705605	-0.136305	0.159	0.247	1	CSNK1G3	1.15144
ANP32E	0.070678	-0.193483	0.449	0.52	1	ANP32E	1.15072
TRPC4AP	0.0710241	0.079948	0.206	0.113	1	TRPC4AP	1.14859
PHF6	0.0712992	-0.190485	0.178	0.267	1	PHF6	1.14692
POGZ	0.0714077	-0.174326	0.187	0.273	1	POGZ	1.14625
AC068491.3	0.0714696	-0.162612	0.065	0.133	1	AC068491.3	1.14588
MTF2	0.0714978	0.176044	0.364	0.26	1	MTF2	1.14571
MCRS1	0.0720635	0.1439	0.252	0.167	1	MCRS1	1.14228
AP1G1	0.0720801	0.138289	0.262	0.167	1	AP1G1	1.14218
FAM3A	0.0721039	0.106655	0.187	0.107	1	FAM3A	1.14204
MARF1	0.0723056	0.094932	0.252	0.153	1	MARF1	1.14083
KRI1	0.0723123	0.139634	0.168	0.093	1	KRI1	1.14079
SNX5	0.0725766	-0.129713	0.262	0.353	1	SNX5	1.1392
C16orf54	0.0727645	0.17099	0.402	0.293	1	C16orf54	1.13808
AC139887.2	0.0727846	0.117442	0.168	0.093	1	AC139887.2	1.13796
NUCB2	0.0728602	0.162079	0.421	0.32	1	NUCB2	1.13751
GOLGA2	0.0729717	0.111025	0.206	0.12	1	GOLGA2	1.13685
ECPAS	0.0736082	-0.14639	0.056	0.12	1	ECPAS	1.13307
RFLNB	0.073812	-0.220812	0.159	0.24	1	RFLNB	1.13187
BCL2L12	0.0740287	-0.131268	0.047	0.107	1	BCL2L12	1.1306
COPA	0.0741695	0.130083	0.374	0.253	1	COPA	1.12977
PIK3R1	0.0744268	-0.185821	0.421	0.487	1	PIK3R1	1.12827
ZNF227	0.074584	0.124172	0.15	0.08	1	ZNF227	1.12735
HIPK3	0.0747143	0.0925736	0.206	0.12	1	HIPK3	1.1266
C8orf76	0.075011	-0.167254	0.103	0.173	1	C8orf76	1.12488
NARS2	0.0751506	0.0826838	0.103	0.047	1	NARS2	1.12407
TRMT10B	0.0751843	0.167811	0.168	0.093	1	TRMT10B	1.12387
ING2	0.0751957	-0.125817	0.047	0.107	1	ING2	1.12381
C19orf66	0.0754167	-0.157104	0.252	0.36	1	C19orf66	1.12253
CUL1	0.0755056	0.194256	0.318	0.22	1	CUL1	1.12202
HINT3	0.0757848	-0.143071	0.047	0.107	1	HINT3	1.12042
SCAND1	0.0760617	0.183964	0.776	0.647	1	SCAND1	1.11883
CSE1L	0.076134	0.127488	0.15	0.08	1	CSE1L	1.11842
TMEM59	0.0761657	0.119582	0.757	0.647	1	TMEM59	1.11824
ZNF275	0.0769261	0.111425	0.131	0.067	1	ZNF275	1.11393
NDUFV3	0.0770253	0.137559	0.299	0.2	1	NDUFV3	1.11337
HRAS	0.0771234	-0.177119	0.15	0.227	1	HRAS	1.11281
VCP	0.0773174	-0.106762	0.514	0.607	1	VCP	1.11172
GALNT11	0.0776297	-0.096296	0.093	0.173	1	GALNT11	1.10997
HEMK1	0.0776312	0.118893	0.112	0.053	1	HEMK1	1.10996
RFX5	0.0776481	0.109879	0.168	0.093	1	RFX5	1.10987
ABCB7	0.0777156	-0.106416	0.065	0.133	1	ABCB7	1.10949
DCLRE1C	0.0777185	-0.16699	0.187	0.273	1	DCLRE1C	1.10948
RASAL3	0.0777735	-0.0879502	0.664	0.72	1	RASAL3	1.10917
IRF3	0.0782778	-0.165405	0.486	0.58	1	IRF3	1.10636
NXT1	0.0784148	0.0985607	0.224	0.133	1	NXT1	1.1056
SETD2	0.0787324	0.208498	0.421	0.32	1	SETD2	1.10385
CKAP5	0.0787986	-0.122053	0.065	0.133	1	CKAP5	1.10348
C12orf65	0.0788269	0.135958	0.336	0.227	1	C12orf65	1.10333
FBRS	0.0788996	-0.16945	0.178	0.26	1	FBRS	1.10293
EEF2	0.0791491	0.146704	0.907	0.867	1	EEF2	1.10155
RP9	0.079205	0.153089	0.131	0.067	1	RP9	1.10125
UVSSA	0.0792505	0.126374	0.14	0.073	1	UVSSA	1.101
CCNI	0.0795094	0.0882825	0.972	0.927	1	CCNI	1.09958
ATP2A3	0.0796484	-0.144248	0.178	0.267	1	ATP2A3	1.09882
ARHGAP35	0.0796822	0.104864	0.206	0.12	1	ARHGAP35	1.09864
EIF5A2	0.0797111	0.0865333	0.121	0.06	1	EIF5A2	1.09848
GALNS	0.0798085	-0.156828	0.065	0.127	1	GALNS	1.09795
SNRPD1	0.0799805	-0.123043	0.458	0.553	1	SNRPD1	1.09702
RBPJ	0.0800205	-0.20786	0.626	0.72	1	RBPJ	1.0968
ARL13B	0.0801288	0.120896	0.112	0.053	1	ARL13B	1.09621
TRIM11	0.0807687	0.165305	0.234	0.147	1	TRIM11	1.09276
AVL9	0.0812075	0.100441	0.168	0.093	1	AVL9	1.0904
EIF1B	0.0812378	-0.147846	0.495	0.6	1	EIF1B	1.09024
EVI2A	0.0813284	-0.143846	0.346	0.447	1	EVI2A	1.08976
SMAP2	0.0813671	0.142236	0.626	0.52	1	SMAP2	1.08955
ADAT1	0.0815364	0.105606	0.121	0.06	1	ADAT1	1.08865
SORD	0.0816718	0.110118	0.103	0.047	1	SORD	1.08793
PRKAA1	0.0816849	-0.128137	0.187	0.28	1	PRKAA1	1.08786
UFM1	0.0816884	0.204316	0.336	0.253	1	UFM1	1.08784
SC5D	0.0818855	-0.103077	0.047	0.107	1	SC5D	1.08679
C12orf49	0.0819964	0.0914525	0.187	0.107	1	C12orf49	1.08621
SRSF7	0.0822484	0.113694	0.832	0.8	1	SRSF7	1.08487
PLPP5	0.0823076	0.160316	0.224	0.14	1	PLPP5	1.08456
EIF3J	0.0825109	-0.214283	0.234	0.32	1	EIF3J	1.08349
MKNK2	0.0826274	-0.207099	0.374	0.433	1	MKNK2	1.08288
AGK	0.0827261	-0.111599	0.056	0.12	1	AGK	1.08236
SMURF2	0.082981	0.0966594	0.206	0.12	1	SMURF2	1.08102
URM1	0.0829854	0.147353	0.271	0.18	1	URM1	1.081
CHID1	0.0837161	0.130173	0.215	0.133	1	CHID1	1.07719
TXNRD1	0.0837737	0.13482	0.28	0.187	1	TXNRD1	1.07689
CRYZ	0.0839971	0.115709	0.112	0.053	1	CRYZ	1.07574
SUMO2	0.0840038	-0.0956172	0.972	0.953	1	SUMO2	1.0757
DESI2	0.0840063	0.124331	0.206	0.127	1	DESI2	1.07569
MLLT3	0.0842486	0.107169	0.271	0.18	1	MLLT3	1.07444
PRKCSH	0.0843576	0.149651	0.252	0.167	1	PRKCSH	1.07388
DUT	0.0844387	0.157088	0.477	0.38	1	DUT	1.07346
PDE6D	0.085557	-0.118723	0.065	0.133	1	PDE6D	1.06774
UBP1	0.0855657	0.103755	0.14	0.073	1	UBP1	1.0677
ZFAS1	0.0857286	0.160417	0.738	0.647	1	ZFAS1	1.06687
AIMP2	0.0857333	-0.0807363	0.047	0.107	1	AIMP2	1.06685
TRDMT1	0.0858	0.0990985	0.103	0.047	1	TRDMT1	1.06651
LNPK	0.086015	-0.179464	0.075	0.14	1	LNPK	1.06543
TRAC	0.0861713	-0.147777	0.972	0.993	1	TRAC	1.06464
SUN2	0.0862486	0.0756036	0.561	0.433	1	SUN2	1.06425
RPS6KB2	0.0862688	0.113644	0.346	0.247	1	RPS6KB2	1.06415
UBA1	0.0863897	-0.151636	0.112	0.187	1	UBA1	1.06354
UBL4A	0.0863949	0.111704	0.252	0.16	1	UBL4A	1.06351
MCFD2	0.0865638	0.149519	0.215	0.133	1	MCFD2	1.06266
ILF2	0.0866642	-0.138134	0.383	0.467	1	ILF2	1.06216
AUH	0.087213	0.089084	0.103	0.047	1	AUH	1.05942
PSMD14	0.0872432	-0.198981	0.215	0.293	1	PSMD14	1.05927
TEN1	0.0873349	0.0816623	0.112	0.053	1	TEN1	1.05881
SPAG7	0.087578	-0.111016	0.206	0.293	1	SPAG7	1.0576
FBXO6	0.087617	0.0979928	0.131	0.067	1	FBXO6	1.05741
TBC1D5	0.0876552	-0.178493	0.103	0.173	1	TBC1D5	1.05722
FLYWCH2	0.0883559	-0.16747	0.168	0.247	1	FLYWCH2	1.05376
GOSR1	0.0883856	0.0927568	0.374	0.253	1	GOSR1	1.05362
RPL7A	0.0888534	-0.0521185	1	1	1	RPL7A	1.05133
CLN8	0.0891796	0.0876315	0.121	0.06	1	CLN8	1.04973
CCNQ	0.0895798	0.10111	0.252	0.16	1	CCNQ	1.04779
ETHE1	0.089957	-0.14774	0.187	0.28	1	ETHE1	1.04597
AHSA1	0.0900089	-0.143773	0.29	0.373	1	AHSA1	1.04571
BRAP	0.0900953	0.0937458	0.103	0.047	1	BRAP	1.0453
RPL22	0.0901382	0.103352	0.991	0.987	1	RPL22	1.04509
SLC35E3	0.0901485	0.0823685	0.131	0.067	1	SLC35E3	1.04504
GMPPB	0.0904094	0.0801844	0.14	0.073	1	GMPPB	1.04379
YIPF6	0.0905108	0.1586	0.224	0.147	1	YIPF6	1.0433
CD27	0.0905504	-0.17621	0.589	0.627	1	CD27	1.04311
HIST1H1D	0.0905699	-0.220811	0.458	0.513	1	HIST1H1D	1.04302
AGPS	0.090971	-0.116862	0.084	0.153	1	AGPS	1.0411
SEPHS1	0.090971	-0.141607	0.084	0.153	1	SEPHS1	1.0411
TAX1BP1	0.0912253	0.112584	0.757	0.633	1	TAX1BP1	1.03988
YIF1A	0.0913653	-0.146018	0.252	0.333	1	YIF1A	1.03922
SVIP	0.0914649	-0.129545	0.271	0.367	1	SVIP	1.03875
ERP44	0.0915902	0.139378	0.43	0.327	1	ERP44	1.03815
PTPN6	0.0917035	-0.11155	0.168	0.253	1	PTPN6	1.03761
NSFL1C	0.091956	0.113355	0.206	0.127	1	NSFL1C	1.03642
GMEB1	0.091956	-0.114527	0.112	0.193	1	GMEB1	1.03642
SBNO2	0.0919615	-0.20409	0.252	0.327	1	SBNO2	1.03639
C1orf123	0.092148	-0.120609	0.15	0.233	1	C1orf123	1.03551
ZNF324	0.0921869	0.0937679	0.112	0.053	1	ZNF324	1.03533
RANBP2	0.0922519	0.156906	0.383	0.287	1	RANBP2	1.03502
AMD1	0.0922519	-0.219142	0.29	0.353	1	AMD1	1.03502
GATAD1	0.0923536	0.119	0.234	0.147	1	GATAD1	1.03455
CYP3A5	0.09253	0.0746656	0.121	0.06	1	CYP3A5	1.03372
ACBD5	0.0927539	0.151456	0.168	0.1	1	ACBD5	1.03267
BAG4	0.093397	-0.160135	0.056	0.113	1	BAG4	1.02967
ATAD2	0.0934588	-0.153142	0.159	0.233	1	ATAD2	1.02938
ASB2	0.0936629	-0.159342	0.355	0.447	1	ASB2	1.02843
PYCR2	0.0939942	0.134134	0.271	0.18	1	PYCR2	1.0269
ABR	0.0945935	-0.152996	0.103	0.173	1	ABR	1.02414
TMED10	0.0948719	-0.158501	0.336	0.433	1	TMED10	1.02286
SRPK1	0.0949104	-0.147183	0.308	0.387	1	SRPK1	1.02269
DNAJC8	0.0949547	-0.128404	0.682	0.693	1	DNAJC8	1.02248
PICALM	0.0951318	0.132495	0.234	0.153	1	PICALM	1.02167
RAB37	0.0953238	0.120873	0.234	0.147	1	RAB37	1.0208
ITPR1	0.0953906	-0.157077	0.168	0.253	1	ITPR1	1.02049
ATP6V1H	0.0955675	0.0890151	0.178	0.1	1	ATP6V1H	1.01969
UCKL1	0.0956033	-0.116704	0.084	0.153	1	UCKL1	1.01953
CHM	0.095619	0.0995897	0.206	0.127	1	CHM	1.01946
ARMH1	0.0956332	0.123135	0.168	0.1	1	ARMH1	1.01939
NAA20	0.0956445	0.224861	0.318	0.24	1	NAA20	1.01934
SLC26A2	0.0957833	0.0709639	0.112	0.053	1	SLC26A2	1.01871
ZNF592	0.0964413	0.0660147	0.159	0.087	1	ZNF592	1.01574
ADNP2	0.0965159	0.0772088	0.112	0.053	1	ADNP2	1.0154
KIF20B	0.0965746	-0.188776	0.15	0.227	1	KIF20B	1.01514
CCR6	0.0967353	0.0767284	0.131	0.067	1	CCR6	1.01442
LMF2	0.0967553	-0.149194	0.112	0.187	1	LMF2	1.01433
CISD3	0.0970301	0.150429	0.271	0.193	1	CISD3	1.01309
RBAK	0.0973896	0.0722444	0.121	0.06	1	RBAK	1.01149
OTUD6B	0.0974959	-0.124631	0.056	0.113	1	OTUD6B	1.01101
BTN3A1	0.0974994	0.12801	0.28	0.187	1	BTN3A1	1.011
ETS1	0.0979578	0.174785	0.794	0.76	1	ETS1	1.00896
UHRF2	0.0981561	-0.158967	0.121	0.193	1	UHRF2	1.00808
SRRD	0.0981921	0.150186	0.159	0.093	1	SRRD	1.00792
PCYOX1	0.0982841	-0.104888	0.093	0.167	1	PCYOX1	1.00752
MUM1	0.0983428	-0.144137	0.159	0.24	1	MUM1	1.00726
ZNF493	0.0985677	0.0549387	0.252	0.153	1	ZNF493	1.00627
CD82	0.0987305	-0.189127	0.364	0.433	1	CD82	1.00555
DNASE1L1	0.0987406	0.0519384	0.112	0.053	1	DNASE1L1	1.0055
CHTF8	0.0988508	0.113892	0.206	0.127	1	CHTF8	1.00502
C22orf39	0.0989298	-0.192987	0.131	0.207	1	C22orf39	1.00467
UPF3A	0.0989555	0.106552	0.43	0.32	1	UPF3A	1.00456
CKAP2	0.0990711	0.128522	0.243	0.16	1	CKAP2	1.00405
SMPD1	0.0992043	0.0512282	0.103	0.047	1	SMPD1	1.00347
BAZ1B	0.0993713	-0.16051	0.402	0.487	1	BAZ1B	1.00274
RAB5A	0.0994565	-0.137338	0.131	0.207	1	RAB5A	1.00237
NCOA4	0.0997123	0.140808	0.318	0.227	1	NCOA4	1.00125
ZNF136	0.100084	0.0640189	0.14	0.073	1	ZNF136	0.999635
TMEM102	0.100084	-0.111233	0.065	0.127	1	TMEM102	0.999635
ZDHHC21	0.100334	0.168512	0.178	0.107	1	ZDHHC21	0.998551
SETDB2	0.100388	0.126181	0.168	0.1	1	SETDB2	0.998317
ITGA4	0.100583	-0.213387	0.729	0.747	1	ITGA4	0.997476
IKZF3	0.10063	-0.170161	0.561	0.607	1	IKZF3	0.997272
CREB3L2	0.100926	0.131689	0.178	0.107	1	CREB3L2	0.995997
MTRF1L	0.100926	0.125882	0.178	0.107	1	MTRF1L	0.995997
PRDX1	0.100994	-0.112999	0.804	0.847	1	PRDX1	0.995706
GALT	0.101144	0.142472	0.15	0.087	1	GALT	0.995058
ANKRD46	0.101434	-0.11499	0.065	0.127	1	ANKRD46	0.993815
HIGD2A	0.101479	0.115529	0.757	0.68	1	HIGD2A	0.993624
COL18A1	0.101586	0.0985928	0.224	0.14	1	COL18A1	0.993167
MTRNR2L8	0.101593	0.0412632	0.103	0.047	1	MTRNR2L8	0.993137
METTL21A	0.101715	0.0845513	0.121	0.06	1	METTL21A	0.992613
SERTAD2	0.101737	-0.119721	0.056	0.113	1	SERTAD2	0.99252
EMC6	0.101864	-0.161534	0.449	0.513	1	EMC6	0.99198
LIMA1	0.101989	0.135817	0.467	0.367	1	LIMA1	0.991447
GALM	0.102173	0.167349	0.495	0.407	1	GALM	0.990662
ZFPL1	0.102458	-0.11459	0.056	0.113	1	ZFPL1	0.989453
VPS51	0.102697	-0.178821	0.336	0.4	1	VPS51	0.988443
TRIP12	0.102741	0.0964162	0.421	0.3	1	TRIP12	0.988257
FLAD1	0.103046	0.0653154	0.224	0.133	1	FLAD1	0.98697
ATG4B	0.103088	0.0973872	0.206	0.133	1	ATG4B	0.986791
ATXN1	0.103196	0.187383	0.477	0.36	1	ATXN1	0.986336
PON2	0.10321	0.0471592	0.103	0.047	1	PON2	0.986277
MRPL35	0.103274	0.0839492	0.29	0.193	1	MRPL35	0.986011
FRYL	0.103464	-0.187886	0.308	0.373	1	FRYL	0.985213
USP36	0.103653	0.103616	0.215	0.133	1	USP36	0.98442
ZFX	0.104054	0.182978	0.393	0.293	1	ZFX	0.98274
JADE2	0.104109	0.0837018	0.262	0.167	1	JADE2	0.982512
RNF44	0.104696	-0.147497	0.14	0.213	1	RNF44	0.980072
PRR14	0.104733	0.137505	0.131	0.073	1	PRR14	0.979915
RPA2	0.104741	0.103372	0.477	0.353	1	RPA2	0.979884
ERN1	0.10513	-0.137333	0.093	0.16	1	ERN1	0.978272
NGLY1	0.105262	-0.176884	0.187	0.26	1	NGLY1	0.977727
LYPLA1	0.105402	0.140435	0.364	0.273	1	LYPLA1	0.977151
SLC25A28	0.105444	0.130563	0.131	0.073	1	SLC25A28	0.976979
ABCB8	0.105756	0.119954	0.159	0.093	1	ABCB8	0.975697
ADAM17	0.105953	-0.147996	0.131	0.207	1	ADAM17	0.974885
BBIP1	0.10602	0.129514	0.234	0.153	1	BBIP1	0.974611
UBASH3A	0.106222	0.0722221	0.28	0.18	1	UBASH3A	0.973786
SEC11C	0.106228	0.147103	0.664	0.54	1	SEC11C	0.973762
TRA2B	0.10695	0.111715	0.486	0.36	1	TRA2B	0.970819
CD200	0.107601	0.121052	0.215	0.133	1	CD200	0.968182
HAGH	0.107607	0.145884	0.449	0.347	1	HAGH	0.968159
IL7R	0.107896	0.192941	0.626	0.52	1	IL7R	0.966993
HNRNPA1	0.107984	0.0938194	0.972	0.893	1	HNRNPA1	0.966642
CYTOR	0.108136	-0.197807	0.682	0.72	1	CYTOR	0.966028
DNAJB11	0.10822	-0.128239	0.112	0.18	1	DNAJB11	0.965694
HDAC2	0.108289	0.140731	0.28	0.187	1	HDAC2	0.965417
C21orf2	0.108374	-0.129707	0.056	0.113	1	C21orf2	0.965077
SSH1	0.108377	-0.161048	0.084	0.147	1	SSH1	0.965063
NELFA	0.108404	-0.114584	0.065	0.127	1	NELFA	0.964955
PRH1	0.108494	0.103672	0.327	0.227	1	PRH1	0.964596
CCDC85B	0.108681	-0.175616	0.589	0.633	1	CCDC85B	0.963846
PDE4B	0.108971	-0.127938	0.243	0.333	1	PDE4B	0.962689
CD200R1	0.109496	-0.15609	0.075	0.133	1	CD200R1	0.960603
BABAM1	0.109592	-0.166128	0.29	0.34	1	BABAM1	0.960221
COX19	0.109662	0.134641	0.299	0.213	1	COX19	0.959945
MRPL45	0.109842	-0.107713	0.065	0.127	1	MRPL45	0.95923
RANBP9	0.109862	0.0897434	0.234	0.153	1	RANBP9	0.959153
GNAI3	0.109945	-0.176078	0.411	0.493	1	GNAI3	0.958824
MAP1LC3A	0.109969	-0.151025	0.121	0.193	1	MAP1LC3A	0.958731
DNAJA1	0.110074	-0.040675	0.598	0.72	1	DNAJA1	0.958317
MICAL2	0.11021	-0.119392	0.14	0.213	1	MICAL2	0.95778
HCST	0.110608	0.179909	0.701	0.64	1	HCST	0.956212
TUBA1B	0.111129	0.0794593	0.551	0.427	1	TUBA1B	0.954172
KIAA1468	0.111195	0.112045	0.15	0.087	1	KIAA1468	0.953916
CD28	0.11137	0.104768	0.402	0.287	1	CD28	0.953232
EMG1	0.111666	-0.0911988	0.196	0.287	1	EMG1	0.952077
ATP5F1B	0.111697	-0.115333	0.561	0.607	1	ATP5F1B	0.951958
LTB	0.111839	0.105258	0.991	0.973	1	LTB	0.951406
PLXNA3	0.112018	0.212953	0.103	0.053	1	PLXNA3	0.950711
ITPA	0.112073	0.127527	0.327	0.24	1	ITPA	0.9505
LEF1	0.112103	0.14508	0.393	0.287	1	LEF1	0.950381
CRYZL1	0.112134	-0.11594	0.093	0.16	1	CRYZL1	0.950261
SLC2A4RG	0.112272	-0.210176	0.252	0.327	1	SLC2A4RG	0.949728
DDT	0.112307	0.0969156	0.664	0.527	1	DDT	0.949594
TCF7	0.112525	0.156423	0.589	0.493	1	TCF7	0.94875
NMRK1	0.112571	-0.149932	0.196	0.273	1	NMRK1	0.948573
NABP1	0.112651	0.20197	0.551	0.453	1	NABP1	0.948264
HNRNPUL1	0.112705	0.170703	0.467	0.38	1	HNRNPUL1	0.948056
METTL2B	0.11271	0.114028	0.178	0.107	1	METTL2B	0.948038
NOSIP	0.112767	0.201601	0.449	0.373	1	NOSIP	0.947819
NRBP1	0.112927	0.145783	0.402	0.307	1	NRBP1	0.947204
CCDC127	0.113088	0.13602	0.159	0.093	1	CCDC127	0.946584
DDX46	0.113196	0.133132	0.729	0.627	1	DDX46	0.94617
MRPL40	0.113284	0.1138	0.262	0.173	1	MRPL40	0.945831
CASP2	0.113542	-0.0945151	0.121	0.193	1	CASP2	0.944842
AC092683.1	0.113665	-0.134609	0.29	0.367	1	AC092683.1	0.944372
FAM89A	0.114004	0.0951653	0.15	0.087	1	FAM89A	0.943081
CD2BP2	0.114295	-0.144058	0.308	0.393	1	CD2BP2	0.941972
HELLS	0.114342	-0.156335	0.112	0.18	1	HELLS	0.941796
TMEM222	0.114511	0.119854	0.187	0.113	1	TMEM222	0.941153
ZNF200	0.114715	-0.0864528	0.075	0.14	1	ZNF200	0.940382
CXCR6	0.115013	-0.443461	0.224	0.293	1	CXCR6	0.939254
STARD3	0.11525	0.0663351	0.215	0.133	1	STARD3	0.938359
RPS6	0.115336	0.0740015	1	1	1	RPS6	0.938034
HSP90B1	0.115425	-0.174759	0.533	0.573	1	HSP90B1	0.937702
WDR33	0.115472	-0.0972229	0.308	0.4	1	WDR33	0.937525
PATL2	0.115475	-0.112777	0.103	0.173	1	PATL2	0.937513
AP3S1	0.115559	0.103255	0.346	0.24	1	AP3S1	0.937194
TNIK	0.115913	0.0971266	0.402	0.293	1	TNIK	0.935869
GRIPAP1	0.116027	-0.193837	0.224	0.293	1	GRIPAP1	0.93544
MAFG	0.116275	0.136536	0.215	0.14	1	MAFG	0.934515
FRG1	0.116306	0.136261	0.336	0.24	1	FRG1	0.9344
POMGNT1	0.116551	-0.128483	0.084	0.147	1	POMGNT1	0.933486
QPRT	0.116566	0.164005	0.131	0.073	1	QPRT	0.933429
EXOC2	0.11665	-0.13616	0.075	0.133	1	EXOC2	0.933114
AFG3L2	0.11678	0.0402555	0.178	0.1	1	AFG3L2	0.932633
PKN2	0.117071	-0.18332	0.196	0.26	1	PKN2	0.931551
RIOK2	0.117095	0.119002	0.187	0.113	1	RIOK2	0.931461
EXOSC7	0.117182	0.129073	0.28	0.193	1	EXOSC7	0.931139
SLC25A5	0.117253	0.128106	0.701	0.627	1	SLC25A5	0.930877
TRIM73	0.117437	0.0799425	0.252	0.16	1	TRIM73	0.930195
ZNF44	0.117455	-0.0961603	0.093	0.16	1	ZNF44	0.930127
PEX1	0.117455	-0.121653	0.093	0.16	1	PEX1	0.930127
RCAN3	0.117685	0.11347	0.402	0.3	1	RCAN3	0.929277
ZMAT5	0.117841	0.0671961	0.168	0.1	1	ZMAT5	0.928704
ICMT	0.118124	-0.144055	0.075	0.133	1	ICMT	0.92766
C8orf82	0.118134	-0.12514	0.093	0.16	1	C8orf82	0.927624
ADAM19	0.118442	-0.158574	0.29	0.36	1	ADAM19	0.926494
KLHL2	0.118668	-0.112401	0.084	0.147	1	KLHL2	0.925667
ATF2	0.118706	-0.135614	0.131	0.2	1	ATF2	0.925528
ZNF790	0.119054	0.119725	0.15	0.087	1	ZNF790	0.924258
COQ10B	0.119176	-0.126554	0.262	0.34	1	COQ10B	0.923812
PFDN6	0.119275	-0.150874	0.243	0.32	1	PFDN6	0.923451
43892	0.119745	0.0671916	0.252	0.16	1	43892	0.921742
WDR60	0.11978	0.116946	0.121	0.067	1	WDR60	0.921614
SRPRB	0.119789	0.0961998	0.15	0.087	1	SRPRB	0.921583
HCFC2	0.120076	-0.151082	0.065	0.12	1	HCFC2	0.920543
POLR2L	0.12014	0.116506	0.57	0.467	1	POLR2L	0.920314
PHRF1	0.120331	-0.11802	0.121	0.193	1	PHRF1	0.919622
RBM23	0.120895	0.149038	0.271	0.187	1	RBM23	0.917591
DLEU2	0.12095	0.177559	0.159	0.1	1	DLEU2	0.917395
ARID4A	0.121094	-0.166822	0.43	0.48	1	ARID4A	0.916878
TBC1D23	0.121271	0.108016	0.15	0.087	1	TBC1D23	0.916244
CASP9	0.121425	0.0949254	0.121	0.067	1	CASP9	0.915692
GTF2E2	0.121715	0.0892185	0.196	0.12	1	GTF2E2	0.914656
RANBP6	0.122062	0.110784	0.131	0.073	1	RANBP6	0.91342
THRAP3	0.122211	-0.113893	0.645	0.667	1	THRAP3	0.91289
HMG20B	0.122234	0.0779728	0.28	0.187	1	HMG20B	0.912807
GRN	0.122263	0.0902449	0.159	0.093	1	GRN	0.912703
MCTS1	0.122476	0.101585	0.374	0.28	1	MCTS1	0.91195
SNX3	0.122679	-0.120455	0.542	0.593	1	SNX3	0.911231
GTF2H3	0.122734	0.0860844	0.168	0.1	1	GTF2H3	0.911036
PARP10	0.122973	-0.119167	0.093	0.16	1	PARP10	0.910191
ZC3H14	0.123148	-0.117826	0.14	0.213	1	ZC3H14	0.909573
PGGHG	0.123328	0.0840131	0.206	0.127	1	PGGHG	0.908939
MRPS31	0.123469	0.101237	0.336	0.24	1	MRPS31	0.908441
JMY	0.123476	-0.0992232	0.065	0.127	1	JMY	0.908418
AKAP7	0.123515	0.119178	0.14	0.08	1	AKAP7	0.908281
IMPA1	0.123669	0.116767	0.131	0.073	1	IMPA1	0.90774
CBX4	0.123755	0.0798264	0.187	0.113	1	CBX4	0.907436
USP12	0.123755	0.0771637	0.187	0.113	1	USP12	0.907436
FARSA	0.123822	0.138576	0.159	0.1	1	FARSA	0.907202
SUMO1	0.123889	-0.120822	0.673	0.74	1	SUMO1	0.906967
STAG2	0.123945	0.0836222	0.439	0.34	1	STAG2	0.906772
OTULIN	0.12405	0.141215	0.262	0.18	1	OTULIN	0.906403
BCAP31	0.124079	-0.162124	0.458	0.547	1	BCAP31	0.906302
PSME4	0.124166	-0.136096	0.121	0.193	1	PSME4	0.905998
ZNF580	0.124168	0.125494	0.243	0.167	1	ZNF580	0.90599
TRIM16	0.12482	-0.172555	0.056	0.107	1	TRIM16	0.903717
HLA-B	0.12487	-0.0623196	1	1	1	HLA-B	0.903541
ENTR1	0.124951	0.13222	0.187	0.12	1	ENTR1	0.90326
CCDC174	0.12507	0.109773	0.28	0.187	1	CCDC174	0.902846
CISD2	0.125531	0.158024	0.336	0.247	1	CISD2	0.90125
EIF4G1	0.125588	0.133696	0.318	0.24	1	EIF4G1	0.901053
GATD1	0.125871	0.104182	0.14	0.08	1	GATD1	0.900075
MBOAT7	0.12611	0.0829845	0.131	0.073	1	MBOAT7	0.89925
PPM1G	0.126129	0.152021	0.692	0.62	1	PPM1G	0.899186
SH3BGRL3	0.12613	-0.0943953	1	1	1	SH3BGRL3	0.899181
FAM53B	0.126501	0.0933749	0.187	0.113	1	FAM53B	0.897906
SYMPK	0.126539	-0.0808147	0.121	0.2	1	SYMPK	0.897777
ATP5F1E	0.126552	-0.0924103	0.972	1	1	ATP5F1E	0.897731
TSC1	0.12657	0.0814342	0.15	0.087	1	TSC1	0.89767
SMIM20	0.126775	-0.0976696	0.121	0.193	1	SMIM20	0.896967
KLF12	0.126942	0.172484	0.271	0.2	1	KLF12	0.896395
OSBPL9	0.12704	0.100816	0.196	0.127	1	OSBPL9	0.896058
LSM10	0.127082	-0.166378	0.374	0.42	1	LSM10	0.895915
RPS6KA1	0.127124	-0.119436	0.196	0.28	1	RPS6KA1	0.895771
PCBP4	0.127321	0.112723	0.121	0.067	1	PCBP4	0.895101
DDX19A	0.127321	0.0951048	0.121	0.067	1	DDX19A	0.895101
PEX11B	0.127461	0.0908291	0.14	0.08	1	PEX11B	0.894624
TRMT6	0.128193	0.0647469	0.159	0.093	1	TRMT6	0.892136
GPCPD1	0.128193	0.0422367	0.159	0.093	1	GPCPD1	0.892136
DRG1	0.128193	-0.0891199	0.084	0.147	1	DRG1	0.892136
GFPT1	0.128261	0.0609183	0.14	0.08	1	GFPT1	0.891904
TFPT	0.128378	-0.0783562	0.243	0.333	1	TFPT	0.891511
DIS3L	0.128589	0.0980155	0.131	0.073	1	DIS3L	0.890796
POLR3A	0.128589	0.0683156	0.131	0.073	1	POLR3A	0.890796
DIMT1	0.128759	0.103748	0.206	0.133	1	DIMT1	0.890222
PIGF	0.128766	0.0687242	0.224	0.14	1	PIGF	0.890198
PMS2	0.129066	0.092025	0.14	0.08	1	PMS2	0.889188
PAK1IP1	0.129115	0.0794565	0.178	0.107	1	PAK1IP1	0.889024
MAPKAPK2	0.129309	0.142456	0.308	0.233	1	MAPKAPK2	0.88837
SLC35C2	0.129433	0.101576	0.243	0.16	1	SLC35C2	0.887954
PCSK7	0.129459	0.105052	0.729	0.633	1	PCSK7	0.887869
KCTD9	0.129678	0.0652374	0.15	0.087	1	KCTD9	0.887134
FAM210B	0.12971	-0.12426	0.084	0.147	1	FAM210B	0.887028
FBXO7	0.129914	-0.0980367	0.224	0.3	1	FBXO7	0.886343
BTLA	0.130108	0.0962375	0.234	0.153	1	BTLA	0.885698
MAP4K1	0.130228	-0.102804	0.206	0.293	1	MAP4K1	0.885297
LMO4	0.130368	0.178987	0.224	0.153	1	LMO4	0.88483
RPL15	0.130402	0.0688097	1	1	1	RPL15	0.884716
IER2	0.130424	0.0246505	0.617	0.493	1	IER2	0.884644
FAM214A	0.130425	-0.172308	0.15	0.213	1	FAM214A	0.884638
HDLBP	0.130472	0.0989292	0.402	0.3	1	HDLBP	0.884483
PRKCA	0.130558	-0.235726	0.196	0.267	1	PRKCA	0.884197
MGAT5	0.130683	-0.132036	0.065	0.12	1	MGAT5	0.88378
TENT4A	0.131254	0.0811191	0.15	0.087	1	TENT4A	0.881888
PRPF4	0.131504	0.0994452	0.14	0.08	1	PRPF4	0.881063
STRBP	0.131528	-0.117959	0.065	0.12	1	STRBP	0.88098
TAB2	0.131592	-0.196407	0.234	0.3	1	TAB2	0.88077
MTIF2	0.131626	0.128093	0.168	0.107	1	MTIF2	0.880659
POLR2J3.1	0.131725	-0.101774	0.636	0.727	1	POLR2J3.1	0.880331
R3HCC1	0.131885	0.0272934	0.196	0.12	1	R3HCC1	0.879803
MTSS1	0.131905	0.0884428	0.103	0.053	1	MTSS1	0.879739
CASP6	0.132086	-0.122739	0.178	0.26	1	CASP6	0.879142
PLEKHM1	0.132293	0.082266	0.112	0.06	1	PLEKHM1	0.878464
CD74	0.13231	-0.13933	0.701	0.72	1	CD74	0.878406
SUPT16H	0.132649	-0.18878	0.327	0.373	1	SUPT16H	0.877297
UNG	0.132767	-0.124125	0.056	0.107	1	UNG	0.87691
TUBB4B	0.13279	0.14641	0.393	0.307	1	TUBB4B	0.876833
SLC35B1	0.132845	0.0691078	0.15	0.087	1	SLC35B1	0.876656
LENG8-AS1	0.13287	0.103144	0.103	0.053	1	LENG8-AS1	0.876573
MITD1	0.132958	-0.137882	0.327	0.407	1	MITD1	0.876287
TRAPPC1	0.133042	0.131793	0.757	0.66	1	TRAPPC1	0.87601
SAP30L	0.133148	0.0823954	0.14	0.08	1	SAP30L	0.875664
SLC39A13	0.133436	0.0913936	0.121	0.067	1	SLC39A13	0.874726
BSDC1	0.133474	0.102538	0.29	0.207	1	BSDC1	0.874604
MPPE1	0.133493	-0.167896	0.103	0.16	1	MPPE1	0.874543
MTRNR2L12	0.133606	-0.139431	0.664	0.667	1	MTRNR2L12	0.874173
USP1	0.133831	0.142972	0.318	0.233	1	USP1	0.873444
GOLPH3L	0.133841	0.0789008	0.103	0.053	1	GOLPH3L	0.873412
SPG11	0.133845	-0.123937	0.14	0.207	1	SPG11	0.873399
RPLP2	0.1339	0.0542092	0.991	1	1	RPLP2	0.873221
NSRP1	0.13411	0.0720631	0.355	0.26	1	NSRP1	0.872538
NFATC2	0.134127	0.149896	0.449	0.34	1	NFATC2	0.872484
DPH7	0.134145	0.0934478	0.112	0.06	1	DPH7	0.872425
ZNF345	0.134145	0.0748756	0.112	0.06	1	ZNF345	0.872425
PLEKHO2	0.134145	0.0663961	0.112	0.06	1	PLEKHO2	0.872425
AGPAT1	0.13445	0.0601432	0.15	0.087	1	AGPAT1	0.871438
TRIM13	0.134454	0.161118	0.402	0.32	1	TRIM13	0.871427
SF3B2	0.134493	-0.147096	0.533	0.593	1	SF3B2	0.871299
TUBA1C	0.134815	0.0851541	0.215	0.14	1	TUBA1C	0.870262
PDK1	0.134817	0.0966403	0.103	0.053	1	PDK1	0.870256
TRIM44	0.13496	0.0910937	0.327	0.233	1	TRIM44	0.869796
SMIM7	0.135194	-0.0930437	0.318	0.393	1	SMIM7	0.869043
PPP1R9B	0.135384	0.0814875	0.131	0.073	1	PPP1R9B	0.868432
FOXN2	0.135493	0.0787667	0.215	0.14	1	FOXN2	0.868084
MYO1F	0.135628	0.171867	0.533	0.46	1	MYO1F	0.867651
USP7	0.135668	-0.145023	0.299	0.373	1	USP7	0.867524
POLK	0.135865	0.0841246	0.29	0.2	1	POLK	0.866891
HMGXB3	0.135916	-0.101666	0.084	0.147	1	HMGXB3	0.866729
NCAPH2	0.136126	0.0959243	0.121	0.067	1	NCAPH2	0.866059
KCTD7	0.136126	0.0864708	0.121	0.067	1	KCTD7	0.866059
DUSP6	0.13652	-0.172583	0.121	0.187	1	DUSP6	0.864805
LYAR	0.136694	0.0408555	0.252	0.167	1	LYAR	0.864252
FAM184A	0.136708	0.0731556	0.159	0.093	1	FAM184A	0.864207
GART	0.136724	0.102726	0.196	0.127	1	GART	0.864155
BLOC1S2	0.136861	0.107626	0.355	0.26	1	BLOC1S2	0.863721
TOP3B	0.136961	0.109278	0.112	0.06	1	TOP3B	0.863403
RAB11FIP2	0.137125	0.0522878	0.131	0.073	1	RAB11FIP2	0.862882
GNG4	0.137338	0.159725	0.262	0.18	1	GNG4	0.86221
LDLR	0.137778	0.0824596	0.103	0.053	1	LDLR	0.86082
THEMIS	0.137817	-0.137422	0.224	0.307	1	THEMIS	0.860698
GBP1	0.137838	-0.139936	0.224	0.3	1	GBP1	0.86063
GALNT2	0.13791	0.0787981	0.112	0.06	1	GALNT2	0.860405
STAM	0.138074	-0.110554	0.131	0.207	1	STAM	0.859888
HLA-DPA1	0.138221	-0.170567	0.636	0.7	1	HLA-DPA1	0.859427
PPP3CB	0.13835	0.140243	0.262	0.193	1	PPP3CB	0.85902
CDC27	0.13866	-0.0952961	0.112	0.18	1	CDC27	0.85805
SH2D3C	0.138857	0.0732253	0.121	0.067	1	SH2D3C	0.857431
EI24	0.139023	0.0790811	0.196	0.12	1	EI24	0.856912
TNIP1	0.139239	0.113913	0.458	0.36	1	TNIP1	0.856239
RYK	0.139593	0.110972	0.196	0.127	1	RYK	0.855137
ABHD17A	0.139831	0.0998512	0.701	0.593	1	ABHD17A	0.854398
AHCTF1	0.139868	0.117925	0.262	0.18	1	AHCTF1	0.854283
MAP4	0.140449	0.0991502	0.449	0.333	1	MAP4	0.852481
PPDPF	0.140537	-0.0927247	0.766	0.773	1	PPDPF	0.852209
ICA1	0.140702	0.100503	0.121	0.067	1	ICA1	0.851701
OSTF1	0.140753	0.0907001	0.495	0.4	1	OSTF1	0.851542
BIRC2	0.140762	0.0411912	0.318	0.227	1	BIRC2	0.851515
RNMT	0.141495	-0.176468	0.28	0.36	1	RNMT	0.84926
PSMD12	0.141509	0.0941609	0.439	0.327	1	PSMD12	0.849217
MTHFS	0.141804	0.0678274	0.103	0.053	1	MTHFS	0.848312
MRPL10	0.141957	-0.108125	0.14	0.207	1	MRPL10	0.847844
RABL2B	0.142003	-0.0931401	0.065	0.12	1	RABL2B	0.847701
STRN3	0.142003	-0.0969588	0.065	0.12	1	STRN3	0.847701
FAM49B	0.142029	-0.0572018	0.57	0.647	1	FAM49B	0.847624
MRS2	0.142307	0.0459321	0.168	0.1	1	MRS2	0.846774
GALK2	0.142331	-0.114856	0.112	0.18	1	GALK2	0.846701
PFDN4	0.142473	0.102535	0.308	0.22	1	PFDN4	0.846269
DDX39A	0.142545	0.0973871	0.318	0.227	1	DDX39A	0.846048
ST8SIA4	0.14258	-0.0850175	0.234	0.327	1	ST8SIA4	0.845941
FBXO9	0.142613	0.104359	0.206	0.133	1	FBXO9	0.845842
SMDT1	0.142998	0.133938	0.636	0.527	1	SMDT1	0.844669
CENPM	0.14317	0.0656496	0.159	0.093	1	CENPM	0.844148
APOLD1	0.143218	0.121185	0.15	0.093	1	APOLD1	0.844002
CSF2	0.143709	0.056325	0.112	0.06	1	CSF2	0.842517
NPAT	0.143824	-0.154695	0.196	0.267	1	NPAT	0.842169
QSOX1	0.14385	0.0705892	0.103	0.053	1	QSOX1	0.842089
CD2	0.143892	-0.130951	0.991	0.993	1	CD2	0.841963
PSMB9	0.143895	-0.128109	0.832	0.893	1	PSMB9	0.841953
MRPL57	0.143931	0.100676	0.617	0.5	1	MRPL57	0.841845
CD44	0.144063	0.0602717	0.804	0.693	1	CD44	0.841448
ERC1	0.144446	0.0545185	0.121	0.067	1	ERC1	0.840293
PYCARD	0.144573	-0.167492	0.449	0.487	1	PYCARD	0.839913
SGK3	0.144693	0.0763673	0.112	0.06	1	SGK3	0.839552
MR1	0.144701	-0.142456	0.131	0.193	1	MR1	0.839527
STRN4	0.144882	0.081843	0.103	0.053	1	STRN4	0.838985
CTSW	0.144882	0.0737126	0.103	0.053	1	CTSW	0.838985
SPN	0.145072	0.0901688	0.542	0.433	1	SPN	0.838416
NUB1	0.145185	-0.118449	0.355	0.42	1	NUB1	0.838077
TMEM245	0.145197	-0.17055	0.168	0.233	1	TMEM245	0.838042
TRAF3	0.145736	-0.137554	0.178	0.26	1	TRAF3	0.836433
ARL2BP	0.145841	-0.0685515	0.234	0.313	1	ARL2BP	0.83612
DNAJC9	0.145863	-0.183521	0.168	0.233	1	DNAJC9	0.836054
ENOX2	0.145919	0.063327	0.103	0.053	1	ENOX2	0.835887
NUP58	0.146019	0.108992	0.262	0.18	1	NUP58	0.83559
AMZ2	0.1461	-0.174926	0.14	0.2	1	AMZ2	0.835349
NDUFA8	0.146224	0.137988	0.346	0.26	1	NDUFA8	0.834981
H2AFY	0.146577	0.134129	0.458	0.36	1	H2AFY	0.833935
FKBP3	0.146603	0.13878	0.486	0.38	1	FKBP3	0.833856
ZNF669	0.146678	0.0579075	0.112	0.06	1	ZNF669	0.833636
EIF3G	0.146836	-0.076395	0.766	0.813	1	EIF3G	0.833168
RETREG2	0.146877	0.102525	0.206	0.14	1	RETREG2	0.833045
CLASP2	0.146963	0.092806	0.103	0.053	1	CLASP2	0.832793
DCBLD1	0.146963	0.0728923	0.103	0.053	1	DCBLD1	0.832793
SYT11	0.146978	0.0924002	0.29	0.2	1	SYT11	0.832747
PHF20L1	0.147097	0.0642654	0.402	0.3	1	PHF20L1	0.832396
UBAC1	0.14713	0.0806301	0.262	0.173	1	UBAC1	0.832299
AGPAT5	0.147476	-0.109105	0.065	0.12	1	AGPAT5	0.83128
EHBP1L1	0.147678	0.110372	0.271	0.193	1	EHBP1L1	0.830684
TOP2B	0.147896	0.0932231	0.477	0.36	1	TOP2B	0.830045
VTA1	0.14792	-0.190132	0.093	0.147	1	VTA1	0.829974
FAU	0.148141	0.0773686	0.991	1	1	FAU	0.829324
PDCD7	0.148512	-0.106187	0.29	0.387	1	PDCD7	0.828237
CFL2	0.148676	0.073483	0.14	0.08	1	CFL2	0.82776
SAMD4B	0.148974	0.0990756	0.215	0.147	1	SAMD4B	0.826889
ZC3H6	0.149322	0.0246359	0.28	0.193	1	ZC3H6	0.825875
TMEM69	0.149335	-0.0781411	0.065	0.12	1	TMEM69	0.825838
CHMP3	0.149567	-0.144473	0.15	0.213	1	CHMP3	0.825163
NPEPPS	0.149587	0.091745	0.271	0.187	1	NPEPPS	0.825107
GPATCH11	0.14959	0.0850231	0.159	0.1	1	GPATCH11	0.825098
RAB2A	0.149691	-0.103712	0.43	0.513	1	RAB2A	0.824804
CLP1	0.150012	-0.119203	0.084	0.14	1	CLP1	0.823873
PXK	0.150206	0.0558161	0.121	0.067	1	PXK	0.823312
ADGRG1	0.150271	-0.142607	0.065	0.12	1	ADGRG1	0.823124
NAA60	0.150427	0.119668	0.215	0.147	1	NAA60	0.822673
MACO1	0.150427	0.0844858	0.215	0.147	1	MACO1	0.822673
TPGS1	0.150439	0.165601	0.364	0.293	1	TPGS1	0.822641
TRAM1	0.150487	0.0822355	0.505	0.373	1	TRAM1	0.8225
ZNF264	0.150765	0.0689008	0.196	0.127	1	ZNF264	0.821699
POLR2B	0.150769	-0.067792	0.346	0.413	1	POLR2B	0.821688
DPAGT1	0.150825	-0.0845234	0.056	0.107	1	DPAGT1	0.821527
TRIM32	0.150825	-0.139156	0.056	0.107	1	TRIM32	0.821527
DNAJB6	0.150947	0.0898736	0.636	0.513	1	DNAJB6	0.821176
ARHGAP4	0.151046	0.110422	0.393	0.3	1	ARHGAP4	0.820892
CHMP1B	0.151165	0.0884097	0.224	0.147	1	CHMP1B	0.820548
RNF113A	0.151247	0.125812	0.262	0.193	1	RNF113A	0.820312
SLC39A1	0.151467	0.105853	0.224	0.153	1	SLC39A1	0.819682
ACO2	0.151483	0.10137	0.29	0.2	1	ACO2	0.819637
NCOA7	0.151485	0.0194171	0.355	0.24	1	NCOA7	0.81963
IL16	0.151898	0.131971	0.57	0.453	1	IL16	0.818448
SUMO3	0.151997	0.136949	0.458	0.36	1	SUMO3	0.818166
CBR1	0.152462	-0.0800796	0.187	0.273	1	CBR1	0.816839
PDCD6IP	0.152476	-0.126208	0.252	0.327	1	PDCD6IP	0.816798
AZI2	0.152684	-0.152523	0.159	0.22	1	AZI2	0.816206
C1D	0.152755	-0.161689	0.318	0.373	1	C1D	0.816005
ARPC1A	0.152805	0.097569	0.327	0.233	1	ARPC1A	0.815861
AC093323.1	0.152846	0.089532	0.187	0.12	1	AC093323.1	0.815746
NSD2	0.152971	0.117107	0.206	0.133	1	NSD2	0.81539
ATF6	0.152973	0.107633	0.159	0.1	1	ATF6	0.815386
MRPS21	0.153094	-0.141322	0.486	0.533	1	MRPS21	0.815042
MRPL9	0.153342	0.0683194	0.364	0.26	1	MRPL9	0.814338
TSTA3	0.153358	0.118543	0.393	0.3	1	TSTA3	0.814293
DUSP2	0.153386	0.114652	0.346	0.26	1	DUSP2	0.814215
S1PR4	0.153678	0.110273	0.701	0.56	1	S1PR4	0.813387
B3GNT2	0.153795	-0.108224	0.093	0.153	1	B3GNT2	0.813057
SLAMF6	0.153801	-0.151731	0.103	0.16	1	SLAMF6	0.81304
YY1AP1	0.153827	-0.152878	0.093	0.147	1	YY1AP1	0.812967
CCDC43	0.153856	0.0694324	0.196	0.127	1	CCDC43	0.812884
CHD9	0.153939	0.0870204	0.28	0.193	1	CHD9	0.81265
NCALD	0.154436	-0.125107	0.112	0.173	1	NCALD	0.811252
LYPLAL1	0.154482	0.0973179	0.168	0.107	1	LYPLAL1	0.811123
KLHDC4	0.154686	-0.133872	0.093	0.147	1	KLHDC4	0.81055
CARD16	0.154705	0.0717361	0.43	0.32	1	CARD16	0.810496
DHRS4-AS1	0.154824	0.0438306	0.112	0.06	1	DHRS4-AS1	0.810163
PNPT1	0.155456	0.0408701	0.178	0.107	1	PNPT1	0.808392
TSSC4	0.155506	-0.168699	0.262	0.327	1	TSSC4	0.808252
KLHDC2	0.155613	-0.148749	0.243	0.307	1	KLHDC2	0.807954
ISOC2	0.15577	0.0387453	0.196	0.12	1	ISOC2	0.807516
RB1	0.155875	-0.0781145	0.056	0.107	1	RB1	0.807224
GHITM	0.15624	0.157228	0.561	0.48	1	GHITM	0.806207
RNF8	0.156346	-0.119402	0.093	0.153	1	RNF8	0.805913
COMMD4	0.156745	0.143616	0.411	0.313	1	COMMD4	0.804805
UBE2B	0.157097	0.1203	0.692	0.613	1	UBE2B	0.803831
ARL8B	0.157365	0.11013	0.206	0.14	1	ARL8B	0.803093
SHMT2	0.157582	0.0336799	0.206	0.133	1	SHMT2	0.802493
METTL18	0.1577	0.0877208	0.243	0.167	1	METTL18	0.802168
GSK3B	0.157855	0.126654	0.215	0.147	1	GSK3B	0.801741
MED30	0.158264	0.037628	0.187	0.113	1	MED30	0.800617
NUDT16L1	0.158306	-0.108288	0.252	0.327	1	NUDT16L1	0.800502
ZNRD1	0.158713	0.0830755	0.551	0.453	1	ZNRD1	0.799387
HMOX2	0.158941	-0.137316	0.411	0.453	1	HMOX2	0.798763
SRSF1	0.159091	-0.141669	0.318	0.38	1	SRSF1	0.798355
THOC5	0.159142	-0.125756	0.065	0.113	1	THOC5	0.798216
SMUG1	0.159297	-0.102394	0.075	0.127	1	SMUG1	0.797792
SMC6	0.159307	-0.125553	0.14	0.207	1	SMC6	0.797766
CCDC167	0.159362	0.124904	0.682	0.593	1	CCDC167	0.797616
FGD5-AS1	0.159371	0.0732647	0.215	0.14	1	FGD5-AS1	0.79759
RAN	0.159823	-0.116894	0.766	0.827	1	RAN	0.79636
EIF3I	0.159825	0.151425	0.626	0.547	1	EIF3I	0.796354
ZCCHC8	0.160137	0.10356	0.215	0.147	1	ZCCHC8	0.795508
GSS	0.160137	-0.149678	0.14	0.2	1	GSS	0.795508
ZNF524	0.160249	0.146287	0.318	0.247	1	ZNF524	0.795204
NDUFB10	0.160399	0.134463	0.72	0.627	1	NDUFB10	0.794799
RBM10	0.160467	0.0622361	0.234	0.153	1	RBM10	0.794613
RIT1	0.160492	-0.103347	0.121	0.187	1	RIT1	0.794545
DPP9	0.160501	-0.123697	0.103	0.16	1	DPP9	0.794523
TRIM59	0.160756	0.0749155	0.252	0.173	1	TRIM59	0.793832
UBE3C	0.160796	0.100199	0.159	0.1	1	UBE3C	0.793723
SLF1	0.160882	-0.102687	0.28	0.353	1	SLF1	0.793492
PM20D2	0.161052	-0.0726927	0.056	0.107	1	PM20D2	0.793033
MGME1	0.161247	0.0278372	0.159	0.093	1	MGME1	0.792508
PTP4A2	0.161509	0.119155	0.85	0.76	1	PTP4A2	0.791804
LLPH	0.161607	0.0832774	0.402	0.307	1	LLPH	0.79154
HIST2H2AC	0.161804	0.112056	0.14	0.087	1	HIST2H2AC	0.79101
TTF2	0.16216	-0.1254	0.075	0.127	1	TTF2	0.790057
MINK1	0.16216	-0.0927291	0.075	0.127	1	MINK1	0.790056
ADSS	0.162186	0.105152	0.383	0.287	1	ADSS	0.789985
TIPRL	0.162266	-0.123482	0.29	0.367	1	TIPRL	0.789772
PRPF40A	0.163051	-0.184601	0.458	0.5	1	PRPF40A	0.787677
ERCC6L2	0.163123	-0.130061	0.075	0.127	1	ERCC6L2	0.787485
LTA	0.163331	0.150305	0.131	0.08	1	LTA	0.786932
LXN	0.16341	0.118503	0.15	0.093	1	LXN	0.786721
HTATIP2	0.163433	0.138719	0.364	0.28	1	HTATIP2	0.78666
VEZT	0.163458	0.118988	0.187	0.127	1	VEZT	0.786594
LENG8	0.163953	0.127103	0.393	0.32	1	LENG8	0.78528
ELOVL1	0.163995	-0.146935	0.14	0.2	1	ELOVL1	0.785169
CBX1	0.164845	-0.0998085	0.206	0.28	1	CBX1	0.782925
AL365361.1	0.165062	-0.12186	0.075	0.127	1	AL365361.1	0.782353
RAB3GAP2	0.165066	-0.156181	0.159	0.22	1	RAB3GAP2	0.782342
PRKCQ	0.165111	0.0509741	0.252	0.173	1	PRKCQ	0.782224
RWDD4	0.165263	0.0632611	0.15	0.093	1	RWDD4	0.781825
NCL	0.165408	0.0677963	0.953	0.873	1	NCL	0.781443
NR2C2AP	0.166249	-0.114024	0.065	0.113	1	NR2C2AP	0.779241
ABHD14A	0.166808	-0.202966	0.178	0.24	1	ABHD14A	0.777783
TOGARAM1	0.167018	-0.115175	0.075	0.127	1	TOGARAM1	0.777237
SYNE3	0.167018	-0.129683	0.075	0.127	1	SYNE3	0.777237
PPP2R5A	0.16714	0.0849749	0.29	0.207	1	PPP2R5A	0.77692
CNPY4	0.167202	0.0450769	0.215	0.14	1	CNPY4	0.776758
UBC	0.167406	0.0744465	0.991	0.993	1	UBC	0.77623
HIST1H1E	0.167429	0.0790593	0.168	0.107	1	HIST1H1E	0.776169
KDM1A	0.16832	0.0868766	0.168	0.107	1	KDM1A	0.773863
C9orf16	0.168441	0.114196	0.785	0.7	1	C9orf16	0.773551
SIRT2	0.168602	0.122041	0.196	0.133	1	SIRT2	0.773138
UBL5	0.168911	0.107208	0.86	0.78	1	UBL5	0.772343
ZNF91	0.169067	0.117303	0.411	0.327	1	ZNF91	0.771941
CASP1	0.169124	0.137831	0.364	0.28	1	CASP1	0.771794
LAX1	0.16918	-0.103331	0.168	0.233	1	LAX1	0.77165
RAB11B	0.169669	0.147937	0.29	0.22	1	RAB11B	0.770396
GATA3	0.170256	0.13022	0.393	0.307	1	GATA3	0.768898
CLTC	0.170269	0.163385	0.336	0.28	1	CLTC	0.768864
ZBTB1	0.170305	0.0648909	0.402	0.293	1	ZBTB1	0.768773
MFSD1	0.170317	0.108934	0.131	0.08	1	MFSD1	0.768741
REV1	0.170558	0.0613644	0.29	0.2	1	REV1	0.768129
ZC3H7B	0.170915	0.071225	0.15	0.093	1	ZC3H7B	0.767219
MAU2	0.170915	-0.0780874	0.084	0.14	1	MAU2	0.767219
UFL1	0.17103	-0.20894	0.243	0.293	1	UFL1	0.766927
SERTAD1	0.171093	-0.0828348	0.121	0.187	1	SERTAD1	0.766767
RPA1	0.171173	0.0969664	0.224	0.16	1	RPA1	0.766565
KIF3B	0.171452	0.0798475	0.14	0.087	1	KIF3B	0.765858
HLA-DQB1	0.171466	-0.240977	0.243	0.3	1	HLA-DQB1	0.765822
AHCYL1	0.171485	-0.0883853	0.14	0.213	1	AHCYL1	0.765775
SLFN5	0.171784	-0.16189	0.72	0.773	1	SLFN5	0.765018
SRRT	0.17182	0.0999221	0.271	0.193	1	SRRT	0.764927
PLEKHA2	0.171921	0.0959409	0.215	0.147	1	PLEKHA2	0.764672
METTL2A	0.171921	0.0884963	0.168	0.107	1	METTL2A	0.76467
NDUFS3	0.17207	-0.127558	0.327	0.4	1	NDUFS3	0.764294
TMX3	0.17241	-0.148381	0.168	0.227	1	TMX3	0.763439
CD47	0.172623	-0.107141	0.654	0.673	1	CD47	0.7629
ITK	0.172852	0.0813451	0.495	0.407	1	ITK	0.762326
TSR2	0.173174	-0.163791	0.168	0.227	1	TSR2	0.761518
MRPS36	0.173409	0.137038	0.402	0.32	1	MRPS36	0.760928
FBXW11	0.173563	0.0461228	0.159	0.1	1	FBXW11	0.760544
MORF4L2	0.173664	-0.0911356	0.187	0.267	1	MORF4L2	0.760291
COPS4	0.173713	0.0573998	0.206	0.133	1	COPS4	0.760167
ZNF101	0.173866	0.0890596	0.364	0.273	1	ZNF101	0.759786
ZCCHC17	0.173941	0.134448	0.243	0.173	1	ZCCHC17	0.759599
SMIM15	0.174049	0.0696371	0.402	0.3	1	SMIM15	0.759329
ZNF207	0.174126	0.145895	0.654	0.567	1	ZNF207	0.759136
WDR61	0.174251	-0.112844	0.159	0.22	1	WDR61	0.758824
ZNRF1	0.174405	-0.0943508	0.57	0.627	1	ZNRF1	0.758441
USP9X	0.174523	0.103441	0.364	0.273	1	USP9X	0.758147
PDCL3	0.174523	0.0994237	0.364	0.273	1	PDCL3	0.758147
ERP29	0.17454	0.0931917	0.832	0.72	1	ERP29	0.758105
MECP2	0.175033	-0.15599	0.383	0.427	1	MECP2	0.75688
CASD1	0.175033	-0.117772	0.159	0.22	1	CASD1	0.756879
NFIC	0.175244	0.0536117	0.178	0.113	1	NFIC	0.756358
CSGALNACT1	0.175301	0.0473395	0.29	0.207	1	CSGALNACT1	0.756215
TRIB2	0.175318	0.0807698	0.215	0.14	1	TRIB2	0.756172
TPR	0.175348	-0.156858	0.654	0.713	1	TPR	0.756098
OARD1	0.175373	-0.104519	0.224	0.3	1	OARD1	0.756037
STOM	0.175616	-0.173343	0.243	0.313	1	STOM	0.755436
TOR1AIP2	0.175695	0.112552	0.252	0.18	1	TOR1AIP2	0.755241
RIOK3	0.175698	0.139285	0.271	0.2	1	RIOK3	0.755233
ZDHHC6	0.175811	0.0961234	0.206	0.14	1	ZDHHC6	0.754953
C1orf174	0.175996	-0.115904	0.121	0.18	1	C1orf174	0.754498
PPIF	0.176256	0.0857799	0.243	0.173	1	PPIF	0.753856
BRIX1	0.176447	0.0795162	0.262	0.187	1	BRIX1	0.753386
DRAIC	0.176578	0.0764253	0.224	0.147	1	DRAIC	0.753062
NFRKB	0.17661	-0.155326	0.121	0.173	1	NFRKB	0.752984
SLC16A7	0.17661	-0.185487	0.121	0.173	1	SLC16A7	0.752984
BAG6	0.176812	0.112375	0.215	0.147	1	BAG6	0.752489
SERTAD3	0.176976	0.127819	0.206	0.147	1	SERTAD3	0.752085
ANKS3	0.17706	-0.083684	0.075	0.127	1	ANKS3	0.751879
TMEM11	0.177093	0.101168	0.234	0.16	1	TMEM11	0.751799
CYHR1	0.177293	-0.136538	0.224	0.28	1	CYHR1	0.751308
NDUFB2	0.177317	0.094298	0.664	0.58	1	NDUFB2	0.75125
RNF19A	0.1776	0.113508	0.598	0.48	1	RNF19A	0.750556
CASP8	0.178179	-0.0901478	0.486	0.56	1	CASP8	0.749143
PPP4C	0.178179	-0.134142	0.495	0.553	1	PPP4C	0.749143
FKBP1A	0.178221	0.123791	0.589	0.493	1	FKBP1A	0.749042
EIF4E3	0.178301	-0.112207	0.093	0.147	1	EIF4E3	0.748847
AC004687.1	0.178446	-0.14864	0.579	0.64	1	AC004687.1	0.748494
ENY2	0.178876	-0.0911264	0.411	0.48	1	ENY2	0.747448
KIAA1328	0.178984	0.105536	0.121	0.073	1	KIAA1328	0.747185
VIRMA	0.179093	-0.109214	0.15	0.22	1	VIRMA	0.74692
RAP1B	0.179133	-0.100588	0.71	0.747	1	RAP1B	0.746825
RNF145	0.179178	-0.143965	0.271	0.34	1	RNF145	0.746716
PNPLA2	0.179296	0.0637265	0.168	0.107	1	PNPLA2	0.74643
ZMAT2	0.179429	0.0838428	0.486	0.413	1	ZMAT2	0.746107
GATC	0.179474	0.102624	0.14	0.087	1	GATC	0.745997
PSIP1	0.179522	0.134286	0.748	0.687	1	PSIP1	0.745883
ZDHHC20	0.179687	0.110684	0.187	0.127	1	ZDHHC20	0.745484
TMEM106B	0.180164	0.0683835	0.318	0.227	1	TMEM106B	0.744333
U2SURP	0.180256	-0.147286	0.505	0.553	1	U2SURP	0.74411
STAT5A	0.180344	-0.0997351	0.121	0.18	1	STAT5A	0.743899
ZRANB2	0.180466	-0.10938	0.533	0.587	1	ZRANB2	0.743606
GLTP	0.18066	0.142704	0.243	0.18	1	GLTP	0.743138
INTS10	0.180677	0.107109	0.374	0.28	1	INTS10	0.743098
COMMD9	0.180712	-0.0784888	0.112	0.173	1	COMMD9	0.743013
GLS	0.180879	0.0591494	0.43	0.327	1	GLS	0.742612
MAP3K11	0.181017	-0.145726	0.121	0.173	1	MAP3K11	0.742281
AAMP	0.181052	0.0528752	0.252	0.173	1	AAMP	0.742196
OSTC	0.181073	-0.0905001	0.421	0.513	1	OSTC	0.742146
GTF2A1	0.181111	0.053656	0.234	0.16	1	GTF2A1	0.742056
CALR	0.181123	-0.117993	0.794	0.807	1	CALR	0.742027
CIR1	0.181173	0.107459	0.439	0.367	1	CIR1	0.741907
NCK2	0.181363	0.138414	0.467	0.387	1	NCK2	0.741451
PDK2	0.181659	0.010122	0.121	0.067	1	PDK2	0.740742
CCNC	0.181669	-0.0961496	0.187	0.26	1	CCNC	0.740719
POLR2H	0.181952	-0.128641	0.224	0.293	1	POLR2H	0.740042
ARPC5L	0.182011	-0.136082	0.486	0.533	1	ARPC5L	0.739902
PRIM2	0.182279	-0.0989086	0.065	0.113	1	PRIM2	0.739264
NDUFC1	0.182881	0.103593	0.533	0.433	1	NDUFC1	0.73783
PRDM4	0.183065	0.127363	0.112	0.067	1	PRDM4	0.737394
GORASP2	0.183087	-0.0952167	0.121	0.187	1	GORASP2	0.737343
SUCO	0.183135	0.0470132	0.159	0.1	1	SUCO	0.737229
FAM96B	0.183169	-0.100451	0.617	0.68	1	FAM96B	0.737149
CLNS1A	0.183246	-0.0967819	0.654	0.687	1	CLNS1A	0.736965
PDCL	0.183393	-0.168621	0.234	0.287	1	PDCL	0.736617
VDAC3	0.183506	0.110932	0.421	0.34	1	VDAC3	0.73635
CCDC28A	0.183788	0.0827647	0.308	0.22	1	CCDC28A	0.735683
CHURC1	0.18391	0.130936	0.645	0.553	1	CHURC1	0.735394
KIF22	0.183955	0.128904	0.178	0.12	1	KIF22	0.735288
LAPTM5	0.183985	-0.15984	0.897	0.893	1	LAPTM5	0.735218
ASL	0.184215	-0.140724	0.084	0.133	1	ASL	0.734675
ZRANB1	0.18427	0.116039	0.168	0.113	1	ZRANB1	0.734546
DPH3	0.184342	0.0679209	0.215	0.147	1	DPH3	0.734377
NUDT4	0.184411	-0.178713	0.168	0.22	1	NUDT4	0.734213
VPS37A	0.1845	0.0791994	0.121	0.073	1	VPS37A	0.734004
SLIRP	0.184584	0.0863379	0.318	0.233	1	SLIRP	0.733805
PHYKPL	0.184688	-0.128906	0.327	0.393	1	PHYKPL	0.733562
BNIP3L	0.184728	0.015732	0.458	0.347	1	BNIP3L	0.733468
MT-CO3	0.184802	0.056297	1	1	1	MT-CO3	0.733293
NIT2	0.184813	-0.0753282	0.187	0.267	1	NIT2	0.733269
HEXA	0.18485	-0.110178	0.206	0.273	1	HEXA	0.73318
LINC01281	0.184959	0.0882296	0.131	0.08	1	LINC01281	0.732926
GPN2	0.184959	-0.146581	0.075	0.12	1	GPN2	0.732926
LAMTOR4	0.18531	0.0872635	0.785	0.673	1	LAMTOR4	0.732102
VKORC1L1	0.185384	0.0818995	0.112	0.067	1	VKORC1L1	0.731929
CHN1	0.185442	0.140422	0.206	0.147	1	CHN1	0.731792
TRIR	0.185504	0.052422	0.86	0.847	1	TRIR	0.731648
MED15	0.185619	0.196169	0.206	0.153	1	MED15	0.731377
HLA-F	0.185697	0.0759122	0.794	0.793	1	HLA-F	0.731195
ACTR2	0.185785	-0.0796246	0.645	0.667	1	ACTR2	0.73099
ABI1	0.185916	-0.113134	0.299	0.367	1	ABI1	0.730683
RNF146	0.186073	0.151335	0.159	0.107	1	RNF146	0.730317
GRAP	0.186164	0.126255	0.168	0.113	1	GRAP	0.730104
HIST1H2AC	0.186164	0.120958	0.168	0.113	1	HIST1H2AC	0.730104
TRAF1	0.186576	0.0948606	0.458	0.353	1	TRAF1	0.729144
COASY	0.186694	0.0846048	0.15	0.093	1	COASY	0.728869
IFITM2	0.187072	0.118819	0.757	0.66	1	IFITM2	0.72799
ATP13A3	0.187197	-0.178065	0.112	0.167	1	ATP13A3	0.727701
SUSD3	0.187288	-0.109098	0.467	0.507	1	SUSD3	0.727491
POMP	0.187307	-0.103736	0.682	0.72	1	POMP	0.727447
RFFL	0.187382	-0.105065	0.15	0.213	1	RFFL	0.727273
METTL13	0.187467	-0.109095	0.121	0.18	1	METTL13	0.727076
RETREG1	0.187909	0.0687736	0.234	0.167	1	RETREG1	0.726052
COG1	0.188214	0.0886466	0.131	0.08	1	COG1	0.725349
MED27	0.188214	-0.115118	0.075	0.12	1	MED27	0.725349
PPIL2	0.188281	0.0522916	0.224	0.153	1	PPIL2	0.725193
TOMM20	0.188415	0.0626122	0.701	0.587	1	TOMM20	0.724886
UBALD2	0.188458	0.145322	0.402	0.327	1	UBALD2	0.724786
UBE2E3	0.188494	-0.0741528	0.243	0.32	1	UBE2E3	0.724702
ID3	0.188682	0.132866	0.206	0.14	1	ID3	0.724269
TIGIT	0.188815	0.103341	0.86	0.807	1	TIGIT	0.723963
GABPB1-AS1	0.189006	0.0675201	0.542	0.427	1	GABPB1-AS1	0.723525
PLEKHB2	0.189049	0.10791	0.262	0.193	1	PLEKHB2	0.723426
SRSF4	0.189064	0.0877839	0.636	0.58	1	SRSF4	0.72339
PTPN7	0.18934	-0.124842	0.682	0.747	1	PTPN7	0.722757
HLA-DMA	0.189417	-0.163783	0.196	0.26	1	HLA-DMA	0.72258
TMA7	0.189564	-0.0967263	0.935	0.927	1	TMA7	0.722243
CNOT6	0.189696	-0.064451	0.075	0.127	1	CNOT6	0.721941
LINC00623	0.189729	-0.153223	0.271	0.333	1	LINC00623	0.721867
SHARPIN	0.189838	0.146018	0.262	0.193	1	SHARPIN	0.721616
YTHDF3	0.190064	-0.101346	0.093	0.147	1	YTHDF3	0.721099
U2AF1L4	0.190265	-0.150472	0.215	0.28	1	U2AF1L4	0.720641
SSH2	0.19041	-0.154676	0.15	0.207	1	SSH2	0.72031
MAP3K2	0.190633	0.147428	0.411	0.333	1	MAP3K2	0.719801
SNX9	0.190746	-0.183718	0.252	0.307	1	SNX9	0.719545
C8orf44	0.190957	0.0726367	0.14	0.087	1	C8orf44	0.719065
GFI1	0.191047	0.123453	0.196	0.14	1	GFI1	0.718859
IFIT5	0.191274	0.0816365	0.112	0.067	1	IFIT5	0.718343
THEM4	0.191298	0.0829442	0.271	0.2	1	THEM4	0.718289
SIVA1	0.191315	-0.0821001	0.495	0.567	1	SIVA1	0.718251
CD4	0.191323	0.116553	0.636	0.607	1	CD4	0.718233
ITGB1	0.191364	-0.146123	0.617	0.707	1	ITGB1	0.718139
EFTUD2	0.191427	0.10062	0.178	0.12	1	EFTUD2	0.717996
PABPC1	0.191628	0.0951416	0.897	0.833	1	PABPC1	0.717541
CYBC1	0.191751	-0.165368	0.458	0.52	1	CYBC1	0.717263
WBP2	0.191941	-0.127808	0.243	0.3	1	WBP2	0.716832
ADPGK	0.192162	-0.0890975	0.178	0.24	1	ADPGK	0.716332
GGA1	0.192214	0.0685866	0.318	0.227	1	GGA1	0.716215
RPS28	0.19282	0.0762628	1	0.993	1	RPS28	0.714847
PRR5L	0.192944	-0.122893	0.121	0.18	1	PRR5L	0.71457
CISD1	0.193145	0.147311	0.224	0.167	1	CISD1	0.714118
CALCOCO2	0.193363	-0.0782368	0.327	0.42	1	CALCOCO2	0.713627
LITAF	0.193531	0.13099	0.383	0.3	1	LITAF	0.713249
ZNF480	0.193752	-0.137342	0.103	0.153	1	ZNF480	0.712754
EED	0.194227	-0.14345	0.299	0.36	1	EED	0.711691
IFNGR1	0.194257	0.110342	0.187	0.127	1	IFNGR1	0.711623
CCDC117	0.194743	-0.106176	0.065	0.113	1	CCDC117	0.710538
ZNF394	0.194766	0.0986735	0.336	0.247	1	ZNF394	0.710487
GZMK	0.194849	-0.0588026	0.15	0.22	1	GZMK	0.710301
REC8	0.194874	0.107959	0.112	0.067	1	REC8	0.710246
EMILIN2	0.194874	0.083547	0.112	0.067	1	EMILIN2	0.710246
CTDSPL2	0.195096	-0.13145	0.14	0.193	1	CTDSPL2	0.709753
PPP2R2A	0.195122	-0.124399	0.271	0.34	1	PPP2R2A	0.709694
PARVG	0.195417	-0.181112	0.262	0.32	1	PARVG	0.709038
MED6	0.195624	-0.0897226	0.206	0.267	1	MED6	0.708577
TOR2A	0.195734	-0.0994479	0.084	0.133	1	TOR2A	0.708333
TP53TG1	0.195852	0.0844989	0.168	0.113	1	TP53TG1	0.708072
REST	0.195973	-0.18749	0.551	0.573	1	REST	0.707803
KYAT3	0.195991	0.118331	0.206	0.147	1	KYAT3	0.707764
RARRES3	0.19603	-0.0720015	0.944	0.98	1	RARRES3	0.707678
LAGE3	0.196045	0.116926	0.393	0.307	1	LAGE3	0.707645
DEDD	0.196085	0.0869128	0.112	0.067	1	DEDD	0.707555
SPOUT1	0.196156	-0.0984886	0.093	0.147	1	SPOUT1	0.707398
TRADD	0.196337	-0.137876	0.43	0.467	1	TRADD	0.706998
MAPRE2	0.196364	0.0674539	0.252	0.18	1	MAPRE2	0.706939
PA2G4	0.196434	-0.0821157	0.551	0.62	1	PA2G4	0.706783
METTL3	0.196488	0.016887	0.206	0.133	1	METTL3	0.706665
MSL3	0.196588	0.0905969	0.411	0.32	1	MSL3	0.706443
NONO	0.196607	0.141461	0.449	0.367	1	NONO	0.706402
GRSF1	0.196656	0.0848711	0.308	0.227	1	GRSF1	0.706292
ANKRD49	0.196739	-0.117021	0.224	0.293	1	ANKRD49	0.706108
PDE7B	0.196802	0.0319804	0.29	0.207	1	PDE7B	0.705971
ZDHHC13	0.196807	-0.090752	0.084	0.133	1	ZDHHC13	0.705959
COMTD1	0.196841	0.0945565	0.168	0.113	1	COMTD1	0.705885
URI1	0.196844	-0.117994	0.355	0.42	1	URI1	0.705878
CMTM7	0.197008	0.0823695	0.505	0.4	1	CMTM7	0.705517
SNX1	0.197158	0.0795376	0.234	0.167	1	SNX1	0.705185
RRAGC	0.197176	0.0969982	0.178	0.12	1	RRAGC	0.705145
WDR89	0.197302	0.0567343	0.112	0.067	1	WDR89	0.704869
TADA2B	0.197444	0.0405029	0.14	0.087	1	TADA2B	0.704557
FBXW5	0.197542	0.0911802	0.523	0.413	1	FBXW5	0.70434
TCOF1	0.197544	0.0875238	0.196	0.133	1	TCOF1	0.704336
HCCS	0.197661	-0.106462	0.112	0.167	1	HCCS	0.704079
BRAT1	0.197802	0.0462564	0.178	0.113	1	BRAT1	0.70377
CTNNBIP1	0.198248	0.0602201	0.121	0.073	1	CTNNBIP1	0.702791
RASSF1	0.198726	0.0557484	0.234	0.16	1	RASSF1	0.701746
TRUB2	0.198756	-0.107902	0.103	0.153	1	TRUB2	0.70168
KDM6A	0.198783	0.128013	0.15	0.1	1	KDM6A	0.701621
C7orf50	0.19896	0.127505	0.234	0.173	1	C7orf50	0.701233
AKNA	0.199042	0.141072	0.579	0.5	1	AKNA	0.701055
MCM7	0.199427	0.0260599	0.121	0.073	1	MCM7	0.700216
TMEM107	0.199427	-0.0787246	0.065	0.113	1	TMEM107	0.700216
PTBP1	0.199464	-0.111452	0.28	0.34	1	PTBP1	0.700135
KCTD17	0.199481	0.151605	0.187	0.133	1	KCTD17	0.700099
HAPLN3	0.199604	0.0948463	0.206	0.147	1	HAPLN3	0.699832
AL662844.4	0.199641	0.0950234	0.14	0.087	1	AL662844.4	0.69975
EIF4ENIF1	0.199751	0.104956	0.112	0.067	1	EIF4ENIF1	0.699511
LINC01184	0.199829	0.105385	0.168	0.113	1	LINC01184	0.699341
PRKAR1A	0.200137	-0.0886326	0.364	0.433	1	PRKAR1A	0.698672
MRPL28	0.200161	-0.121825	0.327	0.393	1	MRPL28	0.698621
TUBGCP5	0.200248	0.0868072	0.103	0.06	1	TUBGCP5	0.698432
LONP1	0.200511	0.0652697	0.131	0.08	1	LONP1	0.697862
KMT2C	0.200564	-0.0952374	0.252	0.327	1	KMT2C	0.697748
NDUFA1	0.200933	-0.153194	0.645	0.66	1	NDUFA1	0.696949
SYTL2	0.200984	0.090874	0.112	0.067	1	SYTL2	0.696838
UBE2D1	0.200984	0.0640199	0.112	0.067	1	UBE2D1	0.696838
ZNF808	0.201142	-0.103806	0.084	0.133	1	ZNF808	0.696498
DTYMK	0.20115	0.0981178	0.262	0.193	1	DTYMK	0.696479
PLCB2	0.201336	-0.0714091	0.103	0.16	1	PLCB2	0.696079
DCPS	0.201428	0.0939493	0.215	0.153	1	DCPS	0.695879
NAA15	0.202221	-0.134253	0.178	0.233	1	NAA15	0.694173
GUCD1	0.202236	-0.102465	0.084	0.133	1	GUCD1	0.694142
SLC25A6	0.202236	-0.13726	0.832	0.92	1	SLC25A6	0.694141
MAD2L1	0.202442	0.0519843	0.15	0.093	1	MAD2L1	0.6937
PIP4K2B	0.202742	-0.151173	0.065	0.107	1	PIP4K2B	0.693057
GTPBP10	0.203335	-0.104733	0.084	0.133	1	GTPBP10	0.691789
NFE2L1	0.203467	0.0788169	0.112	0.067	1	NFE2L1	0.691506
PFDN5	0.203501	0.0894094	0.991	0.98	1	PFDN5	0.691434
PSMB8	0.203577	0.0856022	0.85	0.813	1	PSMB8	0.691272
ISY1	0.203804	-0.0856557	0.15	0.213	1	ISY1	0.690787
ZNF276	0.204005	0.0434623	0.224	0.153	1	ZNF276	0.69036
HP1BP3	0.204048	0.141189	0.72	0.713	1	HP1BP3	0.690268
ZNF445	0.204138	0.107333	0.103	0.06	1	ZNF445	0.690077
STAG1	0.204147	-0.114523	0.196	0.26	1	STAG1	0.690057
SAV1	0.204716	0.0918112	0.112	0.067	1	SAV1	0.688847
RAD23B	0.204751	0.140639	0.318	0.247	1	RAD23B	0.688774
MAD2L2	0.205047	-0.068782	0.14	0.207	1	MAD2L2	0.688147
SSR4	0.205098	-0.0807969	0.785	0.86	1	SSR4	0.688039
USP10	0.205113	0.104001	0.206	0.147	1	USP10	0.688007
C1GALT1	0.205113	0.0877842	0.206	0.147	1	C1GALT1	0.688007
CXorf38	0.205206	0.0832172	0.318	0.24	1	CXorf38	0.687809
TSPYL4	0.205214	0.0350827	0.14	0.087	1	TSPYL4	0.687794
SNRNP200	0.205221	0.0602864	0.495	0.387	1	SNRNP200	0.687778
GEMIN2	0.205397	0.0767128	0.121	0.073	1	GEMIN2	0.687406
ZFYVE19	0.205397	-0.0688767	0.065	0.113	1	ZFYVE19	0.687406
TRAPPC8	0.205446	0.0936512	0.103	0.06	1	TRAPPC8	0.687302
MAVS	0.205592	0.0854582	0.224	0.16	1	MAVS	0.686994
MTREX	0.205959	0.0716502	0.215	0.153	1	MTREX	0.686219
NPTN	0.206042	0.0901795	0.206	0.147	1	NPTN	0.686045
COX7C	0.206053	-0.0956349	0.888	0.92	1	COX7C	0.686021
PITPNC1	0.206197	0.068482	0.299	0.22	1	PITPNC1	0.685718
LMAN2	0.206407	0.107452	0.71	0.593	1	LMAN2	0.685275
ZNF830	0.206482	0.089995	0.252	0.18	1	ZNF830	0.685117
LRRC23	0.206607	0.0660049	0.121	0.073	1	LRRC23	0.684856
MBP	0.206697	-0.22454	0.72	0.773	1	MBP	0.684665
KDM5B	0.206764	-0.0878534	0.234	0.3	1	KDM5B	0.684526
FTL	0.207156	0.0349531	1	0.993	1	FTL	0.683703
SLC22A18	0.207233	0.0906675	0.112	0.067	1	SLC22A18	0.683542
VPS13B	0.207233	0.0887506	0.112	0.067	1	VPS13B	0.683542
DDX55	0.207326	0.11106	0.15	0.1	1	DDX55	0.683345
RNF138	0.207326	0.102957	0.15	0.1	1	RNF138	0.683345
FKBP4	0.20754	-0.106341	0.112	0.167	1	FKBP4	0.682899
GLB1	0.207792	0.0813349	0.215	0.153	1	GLB1	0.682372
SREBF1	0.207821	0.0590609	0.121	0.073	1	SREBF1	0.68231
ZFC3H1	0.207915	-0.0724853	0.271	0.347	1	ZFC3H1	0.682113
CTDP1	0.208082	0.109102	0.103	0.06	1	CTDP1	0.681765
SNRPC	0.208131	0.116601	0.458	0.373	1	SNRPC	0.681663
XRN2	0.208453	-0.180082	0.542	0.587	1	XRN2	0.680992
LINS1	0.208455	0.0848457	0.28	0.213	1	LINS1	0.680987
SEL1L3	0.208677	-0.146509	0.187	0.247	1	SEL1L3	0.680524
MAD1L1	0.208683	0.0936661	0.271	0.207	1	MAD1L1	0.680513
UBE2Q2	0.208688	0.0684359	0.187	0.127	1	UBE2Q2	0.680503
PPWD1	0.20887	-0.0697293	0.215	0.273	1	PPWD1	0.680124
PRKDC	0.208877	-0.0656161	0.421	0.473	1	PRKDC	0.680109
MXI1	0.209052	0.101378	0.178	0.12	1	MXI1	0.679746
HMGA1	0.20911	0.0601365	0.299	0.227	1	HMGA1	0.679625
BUD23	0.209441	0.103713	0.383	0.307	1	BUD23	0.678939
ARPC1B	0.209483	-0.102255	0.813	0.8	1	ARPC1B	0.678851
RPL26L1	0.209516	0.110168	0.271	0.207	1	RPL26L1	0.678783
ATP5PF	0.209583	0.117354	0.757	0.727	1	ATP5PF	0.678645
CDK19	0.209771	0.0921726	0.112	0.067	1	CDK19	0.678254
GIMAP6	0.209776	0.0573939	0.439	0.347	1	GIMAP6	0.678245
PPP4R2	0.209911	0.0916411	0.449	0.367	1	PPP4R2	0.677965
NKTR	0.209946	-0.154973	0.664	0.68	1	NKTR	0.677892
MIAT	0.210085	-0.15554	0.439	0.473	1	MIAT	0.677605
TSPAN5	0.210093	0.123776	0.346	0.267	1	TSPAN5	0.677589
MRM2	0.21017	-0.0603328	0.112	0.173	1	MRM2	0.677428
IFT80	0.210173	-0.0925271	0.121	0.173	1	IFT80	0.677424
SIGIRR	0.21023	-0.135574	0.477	0.553	1	SIGIRR	0.677306
CALM2	0.210591	0.10316	0.869	0.86	1	CALM2	0.676559
SLC25A1	0.210669	0.071538	0.187	0.127	1	SLC25A1	0.676399
NIP7	0.210757	-0.118501	0.234	0.293	1	NIP7	0.676218
TRBC1	0.210976	-0.175239	0.589	0.633	1	TRBC1	0.675766
MEF2D	0.21107	0.0653152	0.168	0.113	1	MEF2D	0.675574
LPCAT1	0.21108	0.068093	0.178	0.12	1	LPCAT1	0.675552
RPS20	0.211168	0.0742932	1	0.987	1	RPS20	0.675372
MSL1	0.211291	-0.145095	0.15	0.207	1	MSL1	0.675118
DNAJC30	0.211656	0.0711826	0.206	0.14	1	DNAJC30	0.67437
PITPNA	0.211679	0.112472	0.206	0.147	1	PITPNA	0.674322
TNF	0.211679	-0.16754	0.14	0.193	1	TNF	0.674322
TARS	0.21184	0.042665	0.196	0.133	1	TARS	0.673991
TM9SF2	0.211969	-0.17811	0.215	0.267	1	TM9SF2	0.673727
TAP2	0.212094	-0.0911087	0.14	0.2	1	TAP2	0.673472
RABL3	0.212332	0.0660527	0.112	0.067	1	RABL3	0.672985
MCF2L2	0.212332	0.0656678	0.112	0.067	1	MCF2L2	0.672985
PRRC2B	0.212435	-0.125345	0.252	0.313	1	PRRC2B	0.672775
NOP58	0.212492	-0.149771	0.355	0.413	1	NOP58	0.672657
MED1	0.212664	0.089714	0.187	0.127	1	MED1	0.672306
PPME1	0.212731	0.0688466	0.121	0.073	1	PPME1	0.672168
TPI1	0.213076	0.104516	0.794	0.713	1	TPI1	0.671465
SLC5A3	0.213217	0.169674	0.449	0.393	1	SLC5A3	0.671178
SORL1	0.213701	-0.148402	0.299	0.36	1	SORL1	0.670193
PRKRIP1	0.214463	-0.117259	0.131	0.187	1	PRKRIP1	0.668647
TMEM181	0.21487	0.105562	0.159	0.107	1	TMEM181	0.667824
TRANK1	0.215027	-0.14408	0.14	0.187	1	TRANK1	0.667507
MZT2A	0.215153	0.07574	0.617	0.52	1	MZT2A	0.667252
YEATS2	0.215197	-0.122663	0.065	0.107	1	YEATS2	0.667163
TAF7	0.215439	-0.137262	0.514	0.567	1	TAF7	0.666675
HIGD1A	0.21548	-0.11975	0.187	0.24	1	HIGD1A	0.666593
CRIPT	0.216086	0.0634989	0.252	0.18	1	CRIPT	0.665374
HCFC1R1	0.216188	-0.105995	0.121	0.173	1	HCFC1R1	0.665168
RMDN1	0.216253	0.109408	0.178	0.127	1	RMDN1	0.665039
CHUK	0.216473	-0.10626	0.065	0.107	1	CHUK	0.664596
SKA2	0.216513	-0.081242	0.29	0.36	1	SKA2	0.664516
C22orf46	0.21686	-0.0797869	0.084	0.133	1	C22orf46	0.663821
USE1	0.216891	0.126449	0.374	0.3	1	USE1	0.663758
CACYBP	0.217306	-0.164584	0.551	0.553	1	CACYBP	0.662927
CAPRIN1	0.217477	0.126716	0.346	0.273	1	CAPRIN1	0.662587
TTLL3	0.2175	0.0558878	0.103	0.06	1	TTLL3	0.662541
CDK5RAP3	0.217706	-0.0945397	0.187	0.253	1	CDK5RAP3	0.662129
EFR3A	0.217792	-0.101473	0.243	0.313	1	EFR3A	0.661958
RFX7	0.218016	0.140847	0.14	0.093	1	RFX7	0.661513
RASSF5	0.218049	-0.121564	0.467	0.533	1	RASSF5	0.661447
TPST2	0.218075	0.0789989	0.364	0.287	1	TPST2	0.661394
GPR132	0.218137	0.0910858	0.159	0.107	1	GPR132	0.661271
ASAP1	0.218291	0.0325843	0.243	0.173	1	ASAP1	0.660963
ENOPH1	0.218293	0.0761494	0.178	0.12	1	ENOPH1	0.660961
SRSF9	0.218565	-0.0952352	0.766	0.793	1	SRSF9	0.66042
ZNF267	0.218581	-0.0804267	0.29	0.353	1	ZNF267	0.660388
ARID5A	0.21864	0.0425652	0.607	0.513	1	ARID5A	0.660271
ELL	0.218986	0.0385758	0.121	0.073	1	ELL	0.659583
SIL1	0.218986	0.0334086	0.121	0.073	1	SIL1	0.659583
JPT2	0.21904	-0.100066	0.065	0.107	1	JPT2	0.659477
FURIN	0.219042	0.0994908	0.346	0.273	1	FURIN	0.659473
LDLRAP1	0.219233	0.0744484	0.159	0.107	1	LDLRAP1	0.659094
CCNK	0.21941	0.0457816	0.234	0.167	1	CCNK	0.658745
MARS	0.219717	-0.108342	0.103	0.153	1	MARS	0.658137
UQCC2	0.219796	0.0672297	0.327	0.253	1	UQCC2	0.65798
APOBEC3H	0.219958	-0.0559197	0.196	0.267	1	APOBEC3H	0.657661
POLR2G	0.220012	-0.0973972	0.299	0.373	1	POLR2G	0.657554
SNIP1	0.22015	0.0455914	0.112	0.067	1	SNIP1	0.657281
DUSP4	0.220194	-0.108812	0.486	0.533	1	DUSP4	0.657194
GBP2	0.22049	0.088115	0.579	0.46	1	GBP2	0.656611
COPS2	0.220556	-0.160323	0.178	0.233	1	COPS2	0.656481
UBR4	0.220557	-0.0922089	0.196	0.26	1	UBR4	0.656478
FAM129A	0.22056	-0.175767	0.271	0.34	1	FAM129A	0.656473
PTMA	0.220641	0.0836184	1	1	1	PTMA	0.656314
SMIM30	0.220805	-0.097822	0.103	0.153	1	SMIM30	0.655992
NDUFAB1	0.220881	0.115913	0.57	0.513	1	NDUFAB1	0.655842
ANP32B	0.221138	0.106546	0.822	0.753	1	ANP32B	0.655337
SLC25A39	0.221424	-0.119376	0.196	0.26	1	SLC25A39	0.654776
ODC1	0.221458	0.122313	0.243	0.187	1	ODC1	0.654709
TIAL1	0.221543	0.0455667	0.514	0.413	1	TIAL1	0.654541
HADHB	0.221661	-0.0480396	0.336	0.42	1	HADHB	0.654311
LARP7	0.221802	0.119872	0.439	0.38	1	LARP7	0.654034
C12orf45	0.221881	-0.105584	0.075	0.12	1	C12orf45	0.65388
MAPKAPK5-AS1	0.221986	0.166168	0.299	0.253	1	MAPKAPK5-AS1	0.653674
MT1X	0.222195	0.094629	0.346	0.273	1	MT1X	0.653266
LAMP2	0.222198	0.100381	0.308	0.233	1	LAMP2	0.653259
CHMP4A	0.222549	0.0721796	0.71	0.613	1	CHMP4A	0.652574
ATR	0.222682	-0.0850704	0.084	0.133	1	ATR	0.652314
CTC1	0.222802	0.0709218	0.121	0.073	1	CTC1	0.652081
GTF2H2	0.222878	-0.166271	0.14	0.187	1	GTF2H2	0.651934
SLC7A6OS	0.2229	0.0692406	0.29	0.213	1	SLC7A6OS	0.65189
TBC1D4	0.222904	-0.150917	0.374	0.46	1	TBC1D4	0.651882
MON1B	0.223051	0.114632	0.215	0.16	1	MON1B	0.651597
PGM2L1	0.223076	0.127931	0.29	0.227	1	PGM2L1	0.651547
TMEM30A	0.223096	0.103488	0.243	0.18	1	TMEM30A	0.651508
ECI2	0.223269	0.0765053	0.252	0.18	1	ECI2	0.651171
DNAJB12	0.223531	-0.0682091	0.15	0.207	1	DNAJB12	0.650663
C2orf49	0.223551	0.0923607	0.178	0.12	1	C2orf49	0.650623
IFI6	0.223746	0.119986	0.271	0.2	1	IFI6	0.650245
RNPS1	0.223772	-0.135062	0.449	0.473	1	RNPS1	0.650195
PKM	0.223811	-0.0618204	0.654	0.687	1	PKM	0.650119
C9orf64	0.224085	0.0463316	0.121	0.073	1	C9orf64	0.649588
THOC1	0.224287	0.106586	0.262	0.2	1	THOC1	0.649195
MPHOSPH9	0.224287	0.0145094	0.271	0.193	1	MPHOSPH9	0.649195
ZNF611	0.224353	-0.0832965	0.075	0.12	1	ZNF611	0.649069
IL21R	0.224614	0.0473456	0.178	0.12	1	IL21R	0.648564
MYO1G	0.224984	0.118676	0.43	0.353	1	MYO1G	0.647848
ISOC1	0.225042	-0.0825604	0.084	0.133	1	ISOC1	0.647736
CAPNS1	0.225067	0.110033	0.467	0.393	1	CAPNS1	0.647689
SLC6A6	0.225265	0.0923628	0.206	0.147	1	SLC6A6	0.647306
BZW2	0.225265	-0.104296	0.14	0.193	1	BZW2	0.647306
ACTR6	0.225337	0.0896466	0.28	0.213	1	ACTR6	0.647167
BTBD1	0.225343	-0.0784696	0.093	0.147	1	BTBD1	0.647157
UBN1	0.225725	0.140059	0.327	0.247	1	UBN1	0.64642
ASNA1	0.225757	0.0893485	0.336	0.267	1	ASNA1	0.646358
MBIP	0.226229	-0.0705639	0.084	0.133	1	MBIP	0.645451
SNAPC3	0.226359	-0.122507	0.093	0.14	1	SNAPC3	0.645202
TENT2	0.226376	0.0534205	0.206	0.14	1	TENT2	0.64517
PEX6	0.22648	0.0253502	0.159	0.1	1	PEX6	0.64497
NRIP1	0.226669	0.12839	0.178	0.127	1	NRIP1	0.644607
COMT	0.226899	0.0816384	0.402	0.3	1	COMT	0.644168
VAPB	0.227124	0.0713677	0.168	0.113	1	VAPB	0.643737
TPMT	0.227418	-0.130957	0.084	0.127	1	TPMT	0.643175
PARVB	0.22742	0.0952054	0.14	0.093	1	PARVB	0.643171
SARDH	0.227536	-0.123645	0.121	0.173	1	SARDH	0.64295
IGFBP4	0.227749	0.0493913	0.393	0.313	1	IGFBP4	0.642543
ZNF706	0.227757	-0.106526	0.682	0.673	1	ZNF706	0.642529
ARHGAP21	0.227963	0.0402096	0.121	0.073	1	ARHGAP21	0.642135
VAPA	0.228425	-0.0967041	0.579	0.64	1	VAPA	0.641257
DHFR	0.228616	0.107674	0.14	0.093	1	DHFR	0.640894
PREB	0.228634	0.0512498	0.103	0.06	1	PREB	0.640859
C11orf49	0.228795	0.102956	0.178	0.127	1	C11orf49	0.640554
TNFSF8	0.228828	-0.105937	0.206	0.267	1	TNFSF8	0.640491
BECN1	0.229492	-0.194605	0.224	0.273	1	BECN1	0.639232
ZDBF2	0.229526	-0.130814	0.065	0.107	1	ZDBF2	0.639169
AC027097.1	0.229816	0.0683367	0.14	0.093	1	AC027097.1	0.63862
AATF	0.230009	0.129509	0.393	0.307	1	AATF	0.638256
ARNT	0.230054	0.0197091	0.103	0.06	1	ARNT	0.638171
PTPMT1	0.230378	0.1457	0.187	0.133	1	PTPMT1	0.637559
ZNF791	0.230581	0.0866052	0.383	0.3	1	ZNF791	0.637176
CCNL2	0.231061	0.0748159	0.355	0.26	1	CCNL2	0.636274
PURB	0.231428	0.135232	0.187	0.133	1	PURB	0.635583
ATXN7L3B	0.231432	0.0971734	0.364	0.287	1	ATXN7L3B	0.635576
CHMP2B	0.231615	0.0788815	0.262	0.187	1	CHMP2B	0.635234
CEP170	0.231766	-0.109589	0.121	0.173	1	CEP170	0.63495
GIGYF2	0.23185	0.0644876	0.346	0.273	1	GIGYF2	0.634793
TMEM187	0.232187	0.0871524	0.15	0.1	1	TMEM187	0.634162
RNF7	0.232326	-0.103843	0.607	0.633	1	RNF7	0.633902
EPRS	0.232358	-0.111588	0.327	0.393	1	EPRS	0.633842
HNRNPD	0.232505	-0.110172	0.636	0.7	1	HNRNPD	0.633568
PPP3R1	0.232559	-0.0991714	0.131	0.187	1	PPP3R1	0.633467
MRPS18A	0.232701	0.09402	0.215	0.153	1	MRPS18A	0.633202
GYG1	0.232751	0.0325627	0.234	0.16	1	GYG1	0.633108
TMEM18	0.23279	0.110867	0.215	0.16	1	TMEM18	0.633036
GTDC1	0.232912	0.0266715	0.103	0.06	1	GTDC1	0.632808
MT-ND2	0.233073	-0.0577962	1	1	1	MT-ND2	0.632509
MRPL11	0.233216	0.0759227	0.374	0.3	1	MRPL11	0.632242
MFSD6	0.233224	-0.0319942	0.103	0.16	1	MFSD6	0.632227
C12orf43	0.233365	0.0770157	0.15	0.1	1	C12orf43	0.631964
LYSMD2	0.233532	0.0364752	0.346	0.26	1	LYSMD2	0.631654
API5	0.233809	0.117498	0.271	0.207	1	API5	0.631138
PDCD10	0.23402	0.0982557	0.542	0.447	1	PDCD10	0.630747
ITFG1	0.234138	0.0357473	0.196	0.133	1	ITFG1	0.630528
CDR2	0.234242	-0.115818	0.224	0.28	1	CDR2	0.630334
COPG1	0.234548	-0.100636	0.093	0.14	1	COPG1	0.629768
TRMT2A	0.234548	-0.101315	0.093	0.14	1	TRMT2A	0.629768
POLR3E	0.234558	-0.0706874	0.093	0.147	1	POLR3E	0.62975
UIMC1	0.234635	0.079262	0.196	0.14	1	UIMC1	0.629608
PEBP1	0.234793	0.114873	0.841	0.747	1	PEBP1	0.629314
DRAP1	0.234938	-0.105029	0.72	0.72	1	DRAP1	0.629047
NDUFA5	0.235024	-0.11581	0.374	0.42	1	NDUFA5	0.628888
NUP153	0.235058	0.12882	0.206	0.153	1	NUP153	0.628825
DIP2A	0.235116	0.121935	0.299	0.227	1	DIP2A	0.628719
PQBP1	0.235304	-0.12671	0.178	0.233	1	PQBP1	0.62837
GDF11	0.235513	0.0593109	0.187	0.127	1	GDF11	0.627986
CSNK1D	0.235523	0.0795462	0.393	0.307	1	CSNK1D	0.627966
WWC3	0.235718	-0.0523406	0.075	0.12	1	WWC3	0.627607
KLHL20	0.235735	-0.108011	0.093	0.14	1	KLHL20	0.627577
LAP3	0.235762	0.0813926	0.318	0.253	1	LAP3	0.627526
VPS8	0.236016	-0.114594	0.084	0.127	1	VPS8	0.627059
CTBP1	0.236034	0.062622	0.168	0.113	1	CTBP1	0.627025
LUZP1	0.236245	0.0566243	0.383	0.307	1	LUZP1	0.626637
ATXN3	0.236246	-0.126095	0.206	0.26	1	ATXN3	0.626635
USP24	0.236346	-0.125998	0.121	0.167	1	USP24	0.626452
FOXP1	0.236481	-0.219825	0.402	0.44	1	FOXP1	0.626204
ILKAP	0.236744	-0.100407	0.178	0.24	1	ILKAP	0.62572
TCEA1	0.236886	0.057945	0.636	0.553	1	TCEA1	0.625461
RIF1	0.236896	0.0794186	0.495	0.413	1	RIF1	0.625443
HSDL2	0.237111	-0.0528804	0.084	0.133	1	HSDL2	0.625049
NINJ2	0.237132	-0.104949	0.121	0.173	1	NINJ2	0.625011
PEX16	0.237247	-0.0931498	0.15	0.213	1	PEX16	0.6248
RCC1L	0.237601	-0.0649587	0.14	0.2	1	RCC1L	0.624152
MIA2	0.238075	-0.0618936	0.168	0.233	1	MIA2	0.623287
GCDH	0.238146	-0.132419	0.14	0.187	1	GCDH	0.623158
SAC3D1	0.238342	0.11333	0.14	0.093	1	SAC3D1	0.622799
ATP6V1C1	0.238342	0.0729043	0.14	0.093	1	ATP6V1C1	0.622799
AKR7A2	0.238359	-0.0775942	0.262	0.34	1	AKR7A2	0.622768
SUMO4	0.238554	-0.13696	0.178	0.227	1	SUMO4	0.622413
LPXN	0.238603	-0.137384	0.355	0.393	1	LPXN	0.622324
C1orf56	0.238652	-0.095722	0.28	0.333	1	C1orf56	0.622234
HLA-DPB1	0.238692	-0.248753	0.598	0.6	1	HLA-DPB1	0.622161
ELAC1	0.238704	0.0349539	0.103	0.06	1	ELAC1	0.62214
ITGB2-AS1	0.23887	0.121473	0.168	0.12	1	ITGB2-AS1	0.621838
CLN5	0.239104	-0.134164	0.187	0.233	1	CLN5	0.621413
DLGAP1-AS1	0.239138	-0.146259	0.224	0.273	1	DLGAP1-AS1	0.621352
THAP12	0.239189	-0.157756	0.14	0.187	1	THAP12	0.621259
PMEPA1	0.23919	0.0540993	0.112	0.067	1	PMEPA1	0.621257
SETD1B	0.239223	-0.169951	0.093	0.133	1	SETD1B	0.621196
FBXO28	0.23932	0.082309	0.15	0.1	1	FBXO28	0.62102
CBX5	0.239567	0.0825871	0.393	0.32	1	CBX5	0.620573
NAA16	0.239596	-0.0618868	0.075	0.12	1	NAA16	0.620521
CD48	0.2396	-0.117323	0.664	0.693	1	CD48	0.620513
ADCY7	0.239881	0.076247	0.196	0.14	1	ADCY7	0.620004
TTF1	0.239981	0.108877	0.271	0.2	1	TTF1	0.619823
CREB1	0.240065	-0.0848	0.29	0.36	1	CREB1	0.619671
TYW3	0.240124	0.0942222	0.224	0.167	1	TYW3	0.619564
SH3BGRL	0.240293	0.0845158	0.72	0.653	1	SH3BGRL	0.619259
EBLN3P	0.240356	-0.157878	0.196	0.24	1	EBLN3P	0.619146
TIGAR	0.240514	0.124436	0.121	0.08	1	TIGAR	0.61886
DBT	0.240524	-0.103532	0.093	0.14	1	DBT	0.618841
ATAD2B	0.240622	-0.100289	0.159	0.213	1	ATAD2B	0.618665
DCUN1D5	0.240658	0.119215	0.262	0.2	1	DCUN1D5	0.618599
DAZAP1	0.24085	-0.0951673	0.168	0.227	1	DAZAP1	0.618254
WDR59	0.241035	0.0936906	0.187	0.133	1	WDR59	0.617919
CAP1	0.241337	-0.0891259	0.766	0.787	1	CAP1	0.617376
TMEM14C	0.241355	-0.133427	0.346	0.413	1	TMEM14C	0.617344
RAP1GDS1	0.241618	-0.109683	0.159	0.213	1	RAP1GDS1	0.61687
MRPL58	0.241708	-0.127115	0.206	0.26	1	MRPL58	0.616709
ODR4	0.241732	-0.0575536	0.093	0.14	1	ODR4	0.616666
CCDC25	0.241737	0.0490956	0.299	0.227	1	CCDC25	0.616657
LEO1	0.242061	-0.150597	0.234	0.28	1	LEO1	0.616076
CASP7	0.242218	-0.080334	0.103	0.153	1	CASP7	0.615793
ARPC2	0.242535	0.0670759	0.981	0.953	1	ARPC2	0.615225
C12orf76	0.242584	-0.0839586	0.121	0.173	1	C12orf76	0.615137
ANKRD36B	0.242592	0.0770737	0.159	0.107	1	ANKRD36B	0.615124
PTOV1	0.242944	0.0961289	0.15	0.1	1	PTOV1	0.614493
IFRD2	0.242944	-0.0860587	0.093	0.14	1	IFRD2	0.614493
CHMP2A	0.24296	-0.0933024	0.617	0.667	1	CHMP2A	0.614465
PCIF1	0.242994	0.0811072	0.131	0.087	1	PCIF1	0.614404
SCAMP3	0.243068	0.0738549	0.196	0.14	1	SCAMP3	0.614272
WASHC1	0.243183	-0.131234	0.103	0.147	1	WASHC1	0.614067
CISH	0.243184	-0.20361	0.131	0.18	1	CISH	0.614066
FAM32A	0.243462	0.117479	0.374	0.287	1	FAM32A	0.613568
CCDC115	0.24362	0.0814108	0.346	0.26	1	CCDC115	0.613287
GANAB	0.243768	0.10121	0.224	0.16	1	GANAB	0.613023
SFT2D2	0.243879	0.0756354	0.271	0.207	1	SFT2D2	0.612825
NPRL2	0.244161	0.0898556	0.15	0.1	1	NPRL2	0.612324
ATP6V1F	0.244579	0.108805	0.579	0.52	1	ATP6V1F	0.61158
RPS21	0.244605	0.0576524	0.972	0.973	1	RPS21	0.611534
NAP1L1	0.24509	0.0653354	0.804	0.7	1	NAP1L1	0.610675
NMB	0.24557	0.41412	0.355	0.287	1	NMB	0.609824
IDS	0.245588	0.125741	0.551	0.46	1	IDS	0.609793
FXR1	0.245594	-0.165442	0.402	0.44	1	FXR1	0.609782
TMEM160	0.246015	-0.118979	0.439	0.48	1	TMEM160	0.609039
XIST	0.24609	-0.0822148	0.86	0.867	1	XIST	0.608906
OXNAD1	0.246195	-0.127241	0.467	0.507	1	OXNAD1	0.608721
ACSF3	0.246285	0.10738	0.196	0.14	1	ACSF3	0.608562
MRPL16	0.246548	-0.0704035	0.243	0.307	1	MRPL16	0.608098
POLD2	0.246607	-0.0745485	0.093	0.14	1	POLD2	0.607995
ZNF429	0.246617	0.0983182	0.112	0.073	1	ZNF429	0.607978
DNAJC10	0.246626	0.0290129	0.178	0.12	1	DNAJC10	0.60796
TBL1XR1	0.246701	0.112036	0.542	0.467	1	TBL1XR1	0.60783
BORCS8	0.246836	-0.0929626	0.112	0.16	1	BORCS8	0.607591
PRPF8	0.247104	-0.121581	0.364	0.44	1	PRPF8	0.60712
POGLUT1	0.247364	-0.0908068	0.131	0.187	1	POGLUT1	0.606664
RPL34	0.247382	-0.0431845	1	1	1	RPL34	0.606632
GADD45B	0.247594	0.0959968	0.187	0.133	1	GADD45B	0.60626
HIPK1	0.247594	0.0942809	0.187	0.133	1	HIPK1	0.60626
STARD7	0.247604	-0.107349	0.168	0.22	1	STARD7	0.606243
CMC2	0.247646	-0.105483	0.318	0.373	1	CMC2	0.606168
C15orf40	0.247929	-0.132975	0.262	0.3	1	C15orf40	0.605672
SKP1	0.24804	-0.091695	0.916	0.967	1	SKP1	0.605478
MRPL41	0.248138	0.106566	0.645	0.613	1	MRPL41	0.605307
METTL23	0.248477	-0.121216	0.346	0.4	1	METTL23	0.604714
ACOT13	0.248726	0.111617	0.196	0.147	1	ACOT13	0.604279
MPHOSPH10	0.248777	0.103036	0.336	0.267	1	MPHOSPH10	0.604189
S100A11	0.248933	-0.0961358	0.879	0.927	1	S100A11	0.603917
S100PBP	0.249032	-0.0608732	0.224	0.293	1	S100PBP	0.603745
BLM	0.24907	0.0885542	0.15	0.1	1	BLM	0.603679
CEBPG	0.24907	-0.0831267	0.093	0.14	1	CEBPG	0.603679
TRAFD1	0.249147	-0.144589	0.103	0.147	1	TRAFD1	0.603545
THOC7	0.249187	-0.0854755	0.421	0.473	1	THOC7	0.603474
ST6GAL1	0.249596	0.117702	0.271	0.213	1	ST6GAL1	0.602762
CNOT10	0.249629	-0.0644259	0.084	0.133	1	CNOT10	0.602704
NAE1	0.250302	-0.0961827	0.234	0.3	1	NAE1	0.601535
PKNOX1	0.250308	0.0771407	0.15	0.1	1	PKNOX1	0.601526
ATG16L1	0.250352	-0.1255	0.103	0.147	1	ATG16L1	0.60145
RBX1	0.250773	0.0964839	0.804	0.667	1	RBX1	0.60072
SRSF10	0.2508	-0.108831	0.551	0.56	1	SRSF10	0.600672
CLASP1	0.250928	-0.0776973	0.093	0.14	1	CLASP1	0.600451
TIMM50	0.251285	-0.0945892	0.084	0.127	1	TIMM50	0.599834
ANAPC10	0.251366	0.020902	0.196	0.133	1	ANAPC10	0.599693
ABRAXAS1	0.25155	0.0383244	0.15	0.1	1	ABRAXAS1	0.599376
SCAI	0.251712	0.0607984	0.196	0.14	1	SCAI	0.599095
EMP3	0.25212	-0.0968707	0.57	0.633	1	EMP3	0.598392
TRIM41	0.252188	0.093985	0.14	0.093	1	TRIM41	0.598276
OMA1	0.252216	0.0495697	0.168	0.113	1	OMA1	0.598227
FAM122A	0.252223	0.110848	0.103	0.067	1	FAM122A	0.598216
INTS11	0.252292	0.0949103	0.318	0.253	1	INTS11	0.598096
RAD23A	0.25255	0.0660935	0.486	0.413	1	RAD23A	0.597653
VMA21	0.25275	0.0413627	0.243	0.18	1	VMA21	0.597309
AP1G2	0.252774	0.0680042	0.159	0.107	1	AP1G2	0.597268
MPLKIP	0.252981	-0.0450385	0.374	0.46	1	MPLKIP	0.596912
GCC2	0.253005	-0.10521	0.785	0.78	1	GCC2	0.596871
PSMG1	0.253116	0.0908232	0.178	0.127	1	PSMG1	0.59668
TSPYL1	0.253227	0.0875616	0.336	0.253	1	TSPYL1	0.59649
JAML	0.253249	0.0148353	0.187	0.247	1	JAML	0.596452
GNA13	0.253253	0.0528514	0.215	0.153	1	GNA13	0.596445
GIT2	0.253268	0.10909	0.402	0.327	1	GIT2	0.59642
PMPCA	0.253455	0.109097	0.252	0.193	1	PMPCA	0.596099
PPP2R1B	0.253697	0.102314	0.112	0.073	1	PPP2R1B	0.595685
PTTG1	0.253714	-0.132527	0.402	0.447	1	PTTG1	0.595656
SETD3	0.253991	0.0588921	0.159	0.107	1	SETD3	0.595182
ING5	0.254045	0.140019	0.215	0.167	1	ING5	0.595089
EIF4H	0.2543	0.0944443	0.393	0.307	1	EIF4H	0.594654
SYNE2	0.254408	0.0804103	0.879	0.84	1	SYNE2	0.594468
SPATS2L	0.25467	-0.0772266	0.168	0.22	1	SPATS2L	0.594022
MBNL2	0.254728	-0.164653	0.075	0.113	1	MBNL2	0.593923
MRPL19	0.254753	0.0767833	0.243	0.18	1	MRPL19	0.59388
PRDX2	0.25476	0.113914	0.776	0.7	1	PRDX2	0.593869
OS9	0.25489	0.0738992	0.346	0.26	1	OS9	0.593647
CCDC59	0.254974	-0.173672	0.262	0.293	1	CCDC59	0.593503
RTF2	0.255106	-0.0808147	0.439	0.493	1	RTF2	0.593279
TNFSF14	0.255258	-0.152996	0.215	0.267	1	TNFSF14	0.593021
CDK5RAP2	0.255264	-0.071416	0.103	0.153	1	CDK5RAP2	0.593011
C6orf89	0.255359	-0.120386	0.252	0.293	1	C6orf89	0.592849
DYNLL1	0.255371	0.107021	0.907	0.853	1	DYNLL1	0.592829
PMPCB	0.255392	-0.141329	0.234	0.287	1	PMPCB	0.592792
CENPT	0.255437	-0.140217	0.093	0.133	1	CENPT	0.592715
UBE2R2	0.255452	0.0943881	0.327	0.253	1	UBE2R2	0.592691
PFKFB3	0.25556	0.056357	0.234	0.167	1	PFKFB3	0.592506
COPS7B	0.256059	0.0636466	0.14	0.093	1	COPS7B	0.59166
TIMM22	0.256114	0.056757	0.196	0.14	1	TIMM22	0.591567
TMEM106C	0.256166	-0.103966	0.112	0.16	1	TMEM106C	0.591478
PMVK	0.25631	-0.0814801	0.224	0.293	1	PMVK	0.591234
RDH10	0.256473	-0.125111	0.103	0.153	1	RDH10	0.590958
CEP68	0.256562	0.0335488	0.15	0.1	1	CEP68	0.590808
ARL1	0.256703	0.106959	0.243	0.187	1	ARL1	0.590569
FAM207A	0.256703	-0.123152	0.178	0.233	1	FAM207A	0.590569
CFLAR	0.257024	-0.120975	0.701	0.713	1	CFLAR	0.590026
C11orf58	0.257071	-0.0954705	0.692	0.753	1	C11orf58	0.589947
ADPRHL2	0.257186	-0.11568	0.159	0.207	1	ADPRHL2	0.589753
RPS25	0.257256	0.0494708	1	1	1	RPS25	0.589634
FAM76A	0.257488	0.0837312	0.131	0.087	1	FAM76A	0.589243
SQOR	0.257591	-0.0716897	0.318	0.373	1	SQOR	0.58907
UBAP1	0.257666	-0.11561	0.103	0.147	1	UBAP1	0.588942
MED23	0.257687	0.099022	0.159	0.113	1	MED23	0.588908
BTAF1	0.257687	-0.0526673	0.103	0.153	1	BTAF1	0.588908
SLC25A11	0.257695	-0.133442	0.234	0.273	1	SLC25A11	0.588894
MAX	0.258072	0.110491	0.327	0.267	1	MAX	0.588259
MAP7D1	0.258497	0.0957111	0.374	0.307	1	MAP7D1	0.587545
DHRS7	0.258571	0.125031	0.458	0.393	1	DHRS7	0.587421
ZC3H13	0.258571	0.0633619	0.467	0.387	1	ZC3H13	0.587421
UGCG	0.258629	-0.170413	0.234	0.273	1	UGCG	0.587323
RPL9	0.258689	0.0577515	1	1	1	RPL9	0.587222
APOL2	0.258975	-0.0745415	0.196	0.253	1	APOL2	0.586743
MFHAS1	0.259265	-0.0938464	0.336	0.4	1	MFHAS1	0.586256
LRPPRC	0.259295	-0.130016	0.159	0.207	1	LRPPRC	0.586206
GFER	0.259383	0.0208743	0.168	0.113	1	GFER	0.586059
RNF168	0.259413	-0.0960631	0.262	0.313	1	RNF168	0.586009
TCF25	0.259503	-0.0692726	0.589	0.687	1	TCF25	0.585858
PBDC1	0.259895	-0.14581	0.224	0.267	1	PBDC1	0.585202
ESF1	0.259924	-0.112048	0.271	0.327	1	ESF1	0.585153
MRPL32	0.25995	-0.10243	0.252	0.307	1	MRPL32	0.58511
WDR92	0.259971	0.0877305	0.14	0.093	1	WDR92	0.585074
CDKN2D	0.260004	-0.135849	0.234	0.287	1	CDKN2D	0.58502
GSPT2	0.260189	-0.0752942	0.065	0.107	1	GSPT2	0.584712
CDC5L	0.261068	-0.120439	0.308	0.353	1	CDC5L	0.583246
TMEM63A	0.261352	0.0695979	0.159	0.113	1	TMEM63A	0.582774
ZNF92	0.261379	0.0530045	0.159	0.107	1	ZNF92	0.58273
ARMT1	0.261416	0.0557069	0.224	0.16	1	ARMT1	0.582668
CXCR4	0.261631	0.0668663	0.738	0.693	1	CXCR4	0.582311
GIT1	0.261839	-0.0821942	0.084	0.127	1	GIT1	0.581966
STK38	0.261911	0.0407939	0.271	0.2	1	STK38	0.581846
LNPEP	0.262226	0.0960249	0.458	0.387	1	LNPEP	0.581325
EIF4A1	0.26237	-0.0765194	0.355	0.413	1	EIF4A1	0.581086
ZNF383	0.262403	0.0662514	0.121	0.08	1	ZNF383	0.581031
ISG20	0.262418	0.143245	0.57	0.56	1	ISG20	0.581006
JOSD1	0.262481	0.0604	0.224	0.16	1	JOSD1	0.580903
PTK2B	0.263019	0.0560685	0.168	0.113	1	PTK2B	0.580014
IST1	0.263089	0.134677	0.327	0.26	1	IST1	0.579898
DCAF10	0.263179	-0.0640747	0.084	0.127	1	DCAF10	0.579748
DGKH	0.26339	-0.176922	0.178	0.227	1	DGKH	0.5794
PSME2	0.26374	-0.0997026	0.766	0.853	1	PSME2	0.578824
NUP214	0.263815	0.0863079	0.159	0.113	1	NUP214	0.5787
FEM1B	0.263834	-0.0399214	0.112	0.067	1	FEM1B	0.578668
NINJ1	0.264102	-0.0543593	0.14	0.2	1	NINJ1	0.578229
RPP25L	0.264483	0.0640142	0.234	0.173	1	RPP25L	0.577602
RALGAPA2	0.264523	-0.134034	0.075	0.113	1	RALGAPA2	0.577536
TCTA	0.264525	-0.0683892	0.084	0.127	1	TCTA	0.577534
H2AFX	0.264747	-0.114451	0.121	0.167	1	H2AFX	0.57717
SDHD	0.265096	0.0531802	0.458	0.367	1	SDHD	0.576597
EGLN1	0.265205	-0.0963394	0.14	0.187	1	EGLN1	0.576418
GLRX2	0.265738	0.122828	0.168	0.12	1	GLRX2	0.575546
PDHA1	0.265754	0.0782251	0.206	0.153	1	PDHA1	0.575521
BOD1	0.265944	-0.110406	0.075	0.113	1	BOD1	0.57521
AC005332.5	0.266043	0.0408194	0.243	0.173	1	AC005332.5	0.575048
NME1	0.266399	0.0588675	0.28	0.207	1	NME1	0.574467
OAZ2	0.266418	0.105272	0.224	0.167	1	OAZ2	0.574436
PRELID3B	0.266863	0.0995904	0.243	0.187	1	PRELID3B	0.573711
CIAPIN1	0.26754	0.102398	0.159	0.113	1	CIAPIN1	0.572612
ETFRF1	0.267648	-0.105342	0.103	0.147	1	ETFRF1	0.572436
HADHA	0.267695	0.0796667	0.579	0.467	1	HADHA	0.57236
FGFR1OP2	0.267727	0.112722	0.542	0.467	1	FGFR1OP2	0.572308
ZNF644	0.267809	0.0521223	0.402	0.313	1	ZNF644	0.572175
CCT2	0.267827	-0.15672	0.336	0.38	1	CCT2	0.572146
TSPAN2	0.267999	-0.0334237	0.075	0.12	1	TSPAN2	0.571867
DUSP23	0.268134	-0.0629803	0.168	0.227	1	DUSP23	0.571648
ZNF566	0.268278	0.108894	0.112	0.073	1	ZNF566	0.571415
GTF2H1	0.268306	0.0490752	0.178	0.127	1	GTF2H1	0.571369
ZHX1	0.268589	-0.0789746	0.084	0.127	1	ZHX1	0.570912
AL031846.2	0.269022	-0.0594647	0.065	0.107	1	AL031846.2	0.570212
KRIT1	0.269253	-0.134917	0.271	0.313	1	KRIT1	0.56984
SREK1IP1	0.269356	-0.0921522	0.206	0.26	1	SREK1IP1	0.569673
HLA-DQA1	0.2695	-0.285283	0.121	0.167	1	HLA-DQA1	0.569441
LY96	0.269501	0.0696583	0.336	0.253	1	LY96	0.56944
MAT2A	0.269584	0.10531	0.308	0.247	1	MAT2A	0.569307
ZNF143	0.269983	0.142822	0.178	0.133	1	ZNF143	0.568663
TAF11	0.270177	0.0716534	0.224	0.167	1	TAF11	0.568352
NDUFAF6	0.270236	-0.0836323	0.075	0.113	1	NDUFAF6	0.568257
BCL10	0.270237	0.0411658	0.243	0.173	1	BCL10	0.568256
CBX6	0.270406	-0.1321	0.327	0.367	1	CBX6	0.567984
CEP85L	0.270527	-0.130412	0.243	0.293	1	CEP85L	0.56779
DGLUCY	0.270875	0.075832	0.271	0.207	1	DGLUCY	0.567231
HELZ	0.270887	-0.091195	0.374	0.433	1	HELZ	0.567213
BZW1	0.270982	0.0610172	0.607	0.513	1	BZW1	0.56706
CD46	0.271206	0.121856	0.439	0.36	1	CD46	0.566701
DPY30	0.271713	0.0763439	0.449	0.367	1	DPY30	0.565889
SVBP	0.271809	-0.128	0.187	0.233	1	SVBP	0.565736
COQ4	0.27198	0.0606472	0.206	0.147	1	COQ4	0.565464
SPATA33	0.272399	0.0658414	0.121	0.08	1	SPATA33	0.564794
TAF9B	0.272763	0.120395	0.112	0.073	1	TAF9B	0.564215
SF3A2	0.272803	0.0451844	0.215	0.153	1	SF3A2	0.564151
GGNBP2	0.272951	0.0459924	0.523	0.44	1	GGNBP2	0.563916
ACSL6	0.273095	0.0135192	0.196	0.14	1	ACSL6	0.563686
PDE12	0.273095	-0.137742	0.14	0.18	1	PDE12	0.563686
MAML2	0.27318	0.0924939	0.29	0.227	1	MAML2	0.563552
DDA1	0.273736	-0.106974	0.196	0.24	1	DDA1	0.562668
STK25	0.273918	0.0640144	0.215	0.153	1	STK25	0.562379
FOXK1	0.274074	-0.079986	0.084	0.127	1	FOXK1	0.562132
ZNF384	0.274575	-0.0998993	0.075	0.113	1	ZNF384	0.561339
SNRPD2	0.274654	-0.051201	0.636	0.693	1	SNRPD2	0.561214
KIAA1586	0.275179	0.0929426	0.103	0.067	1	KIAA1586	0.560385
SERP1	0.275212	-0.0542672	0.729	0.767	1	SERP1	0.560332
MCCC1	0.275376	0.0517906	0.131	0.087	1	MCCC1	0.560074
KIDINS220	0.27565	-0.073377	0.187	0.24	1	KIDINS220	0.559641
MYC	0.275781	0.0830218	0.112	0.073	1	MYC	0.559436
GNPTG	0.275781	0.0754411	0.112	0.073	1	GNPTG	0.559436
NSF	0.27586	-0.137512	0.159	0.2	1	NSF	0.559311
STX12	0.275903	0.0826176	0.271	0.207	1	STX12	0.559243
MLF2	0.276071	0.0984236	0.28	0.22	1	MLF2	0.558979
CREBZF	0.276224	0.108868	0.43	0.36	1	CREBZF	0.558738
LINC00685	0.276582	0.0376984	0.196	0.14	1	LINC00685	0.558177
CHCHD1	0.276673	0.0957164	0.607	0.52	1	CHCHD1	0.558034
TRMT1	0.276786	0.0631455	0.131	0.087	1	TRMT1	0.557855
CHRAC1	0.276798	-0.0932691	0.112	0.16	1	CHRAC1	0.557837
CAMLG	0.277052	-0.0920753	0.346	0.393	1	CAMLG	0.557438
ABRACL	0.277184	0.0313617	0.692	0.667	1	ABRACL	0.557232
PRPSAP2	0.277453	0.059887	0.187	0.133	1	PRPSAP2	0.55681
ACSL3	0.277494	-0.10859	0.075	0.113	1	ACSL3	0.556746
RAD9A	0.27768	-0.0769696	0.14	0.193	1	RAD9A	0.556455
BRD3	0.277758	-0.0976279	0.14	0.187	1	BRD3	0.556333
POLE4	0.277824	-0.109817	0.271	0.32	1	POLE4	0.556231
SEC24C	0.277961	-0.0250309	0.075	0.12	1	SEC24C	0.556016
CDC25B	0.278227	0.0835852	0.121	0.08	1	CDC25B	0.5556
GMIP	0.278242	-0.0467021	0.131	0.18	1	GMIP	0.555577
DNPEP	0.278649	0.0439892	0.187	0.133	1	DNPEP	0.554943
DHX38	0.278649	0.028573	0.187	0.133	1	DHX38	0.554943
FBXL3	0.278738	0.140148	0.271	0.22	1	FBXL3	0.554804
MED13L	0.278871	-0.118366	0.168	0.22	1	MED13L	0.554596
GLRX5	0.279314	-0.10911	0.364	0.42	1	GLRX5	0.553907
ZMYND11	0.279543	-0.155497	0.159	0.193	1	ZMYND11	0.553552
QTRT2	0.279936	0.098982	0.103	0.067	1	QTRT2	0.552941
PAF1	0.279971	-0.0404993	0.093	0.14	1	PAF1	0.552888
BCCIP	0.280084	-0.0676269	0.14	0.187	1	BCCIP	0.552712
EP300	0.280211	-0.0922231	0.327	0.36	1	EP300	0.552514
GTF2F2	0.280462	-0.0341172	0.187	0.247	1	GTF2F2	0.552125
BTF3L4	0.280541	-0.10946	0.28	0.327	1	BTF3L4	0.552003
SON	0.280693	0.0859111	0.841	0.787	1	SON	0.551768
RRAGA	0.28093	-0.123895	0.299	0.34	1	RRAGA	0.551402
PLP2	0.281027	0.114182	0.449	0.373	1	PLP2	0.551252
SH3BP1	0.28104	0.0247132	0.271	0.193	1	SH3BP1	0.551232
IFIH1	0.281047	0.0251911	0.131	0.087	1	IFIH1	0.551221
SELENOO	0.281117	-0.0446234	0.065	0.107	1	SELENOO	0.551113
CHIC2	0.281347	-0.0679154	0.252	0.307	1	CHIC2	0.550757
OSBPL8	0.281432	-0.0765508	0.505	0.56	1	OSBPL8	0.550626
EEA1	0.281724	0.0212731	0.168	0.113	1	EEA1	0.550177
BRD2	0.281817	0.120998	0.421	0.367	1	BRD2	0.550033
BIRC3	0.281918	-0.0444766	0.542	0.6	1	BIRC3	0.549878
RPL12	0.281985	0.062928	1	0.993	1	RPL12	0.549774
FOXO1	0.28199	-0.192664	0.262	0.287	1	FOXO1	0.549766
TLK1	0.282144	0.0267681	0.664	0.547	1	TLK1	0.549529
EIF4B	0.282733	-0.10572	0.645	0.687	1	EIF4B	0.548624
ATP2A2	0.282874	0.087209	0.178	0.127	1	ATP2A2	0.548407
B2M	0.283129	-0.0202172	1	1	1	B2M	0.548016
ATP6V0E2	0.283348	0.0708255	0.29	0.22	1	ATP6V0E2	0.54768
SIGMAR1	0.283425	0.0638586	0.112	0.073	1	SIGMAR1	0.547561
PWP1	0.283452	-0.0889975	0.206	0.26	1	PWP1	0.547521
PQLC1	0.283596	-0.0949304	0.14	0.187	1	PQLC1	0.5473
PTPN13	0.283596	-0.155029	0.14	0.187	1	PTPN13	0.5473
PRRC1	0.283645	0.0685468	0.196	0.14	1	PRRC1	0.547224
CFAP298	0.283803	-0.06763	0.206	0.267	1	CFAP298	0.546984
TM9SF4	0.283856	-0.0754809	0.084	0.127	1	TM9SF4	0.546902
ZNF639	0.283912	0.0368948	0.131	0.087	1	ZNF639	0.546817
FAM208A	0.283935	0.0773383	0.355	0.28	1	FAM208A	0.54678
ECE1	0.284139	0.0360872	0.121	0.08	1	ECE1	0.546469
RBM33	0.284154	-0.132146	0.299	0.347	1	RBM33	0.546446
AGA	0.284585	-0.124989	0.093	0.133	1	AGA	0.545787
ZNF600	0.284629	0.0869394	0.15	0.107	1	ZNF600	0.54572
COPS8	0.284834	0.0333117	0.196	0.14	1	COPS8	0.545408
RASSF2	0.284834	-0.114768	0.14	0.18	1	RASSF2	0.545408
SLF2	0.284883	0.0666097	0.234	0.173	1	SLF2	0.545333
MTA2	0.284884	-0.0903259	0.075	0.113	1	MTA2	0.545331
NDFIP1	0.284903	0.0886028	0.589	0.487	1	NDFIP1	0.545304
MAT2B	0.284916	0.101881	0.439	0.373	1	MAT2B	0.545283
TEX30	0.284971	0.058683	0.112	0.073	1	TEX30	0.545199
WIPF2	0.285212	0.0465805	0.262	0.2	1	WIPF2	0.544832
PCBP1	0.285551	-0.0639247	0.701	0.76	1	PCBP1	0.544317
VAMP1	0.285631	0.0612674	0.121	0.08	1	VAMP1	0.544195
DCTN3	0.285639	-0.114739	0.421	0.433	1	DCTN3	0.544183
RSRC2	0.285707	-0.152917	0.626	0.613	1	RSRC2	0.544078
MGA	0.286	0.0771541	0.215	0.16	1	MGA	0.543634
SATB1	0.286027	0.0668282	0.196	0.14	1	SATB1	0.543593
PSMA7	0.286136	0.0590469	0.944	0.933	1	PSMA7	0.543428
MIR3142HG	0.286241	-0.12308	0.196	0.24	1	MIR3142HG	0.543269
ANKRD10	0.286538	-0.0824189	0.168	0.22	1	ANKRD10	0.542818
C1orf216	0.286598	-0.104944	0.121	0.167	1	C1orf216	0.542727
ATP5PD	0.286608	0.101848	0.607	0.533	1	ATP5PD	0.542712
SF3B6	0.286726	-0.0724456	0.682	0.707	1	SF3B6	0.542533
NT5C	0.286752	0.130433	0.364	0.32	1	NT5C	0.542494
CIAO1	0.28685	0.0633785	0.318	0.247	1	CIAO1	0.542345
OCIAD1	0.28789	-0.0773821	0.561	0.607	1	OCIAD1	0.540773
TRMO	0.288172	-0.0102696	0.075	0.12	1	TRMO	0.540348
NT5DC1	0.288199	-0.154766	0.178	0.213	1	NT5DC1	0.540308
LINC01934	0.288202	0.131621	0.458	0.407	1	LINC01934	0.540303
RPL37	0.288507	0.0383419	1	1	1	RPL37	0.539843
RGS2	0.288695	-0.301522	0.121	0.16	1	RGS2	0.53956
WDR36	0.288728	-0.1047	0.093	0.133	1	WDR36	0.539511
CCS	0.288809	0.0741025	0.318	0.247	1	CCS	0.539389
DNMT3A	0.288939	-0.100601	0.159	0.207	1	DNMT3A	0.539193
[truncated: 3,852 more rows]

## Sheet: S3C-PD1+ IgG vs. Bispecific
Table S3C: Differential Analysis of CD4+PD1+FOXP3- T cells IgG vs. Bispecific
	p_val	avg_logFC	pct.1	pct.2	p_val_adj	Gene_ID	logP
IQCE	3.44905e-05	0.231988	0.163	0.02	0.69664	IQCE	4.4623
POU2F2	0.000250082	0.267329	0.38	0.16	1	POU2F2	3.60192
NDUFS7	0.000293907	0.297376	0.674	0.427	1	NDUFS7	3.53179
ACTN1	0.000335187	0.215814	0.152	0.027	1	ACTN1	3.47471
EBPL	0.000418222	0.34648	0.457	0.233	1	EBPL	3.37859
DENND4B	0.000419419	0.275109	0.217	0.067	1	DENND4B	3.37735
ZNF557	0.000438467	0.152308	0.152	0.027	1	ZNF557	3.35806
MPHOSPH10	0.000495187	0.219188	0.522	0.267	1	MPHOSPH10	3.30523
PEBP1	0.000502169	0.274903	0.924	0.747	1	PEBP1	3.29915
EBI3	0.000556284	0.214237	0.141	0.027	1	EBI3	3.2547
HDAC3	0.000627633	0.234662	0.359	0.16	1	HDAC3	3.20229
VAPB	0.00065854	0.241367	0.293	0.113	1	VAPB	3.18142
DBI	0.000730749	0.312548	0.87	0.707	1	DBI	3.13623
LTA	0.000779882	0.486719	0.228	0.08	1	LTA	3.10797
SELENOK	0.000861017	0.323887	0.696	0.467	1	SELENOK	3.06499
RBM26	0.000949185	0.311805	0.489	0.273	1	RBM26	3.02265
GMPR2	0.00101788	0.226943	0.37	0.167	1	GMPR2	2.9923
MAFG	0.00105442	0.323188	0.304	0.14	1	MAFG	2.97699
UNC45A	0.00117991	0.244192	0.391	0.187	1	UNC45A	2.92815
NR2F6	0.0014674	0.186843	0.207	0.067	1	NR2F6	2.83345
XIAP	0.00147643	0.278488	0.467	0.267	1	XIAP	2.83079
BCAS3	0.00155848	0.273559	0.261	0.1	1	BCAS3	2.8073
C2orf49	0.00164885	0.243757	0.272	0.12	1	C2orf49	2.78282
YIPF2	0.00166562	0.152772	0.207	0.067	1	YIPF2	2.77842
PNO1	0.00183627	0.196475	0.239	0.093	1	PNO1	2.73606
RELB	0.00187318	0.182064	0.413	0.2	1	RELB	2.72742
FBLN5	0.00200453	0.187706	0.141	0.033	1	FBLN5	2.69799
IPO5	0.00202086	0.17999	0.207	0.067	1	IPO5	2.69446
IKBKE	0.0020661	0.200781	0.196	0.067	1	IKBKE	2.68485
IAH1	0.00218437	0.310058	0.598	0.387	1	IAH1	2.66067
TOLLIP	0.00226296	0.221217	0.207	0.073	1	TOLLIP	2.64532
ERH	0.00249586	0.238458	0.804	0.707	1	ERH	2.60278
NAA20	0.0029022	0.213572	0.435	0.24	1	NAA20	2.53727
AL121603.2	0.00292824	0.135994	0.109	0.02	1	AL121603.2	2.53339
FRG1	0.00293241	0.216578	0.424	0.24	1	FRG1	2.53278
UTP11	0.00297594	0.222639	0.315	0.147	1	UTP11	2.52638
TBCE	0.0029868	-0.278932	0.043	0.173	1	TBCE	2.52479
TCEA2	0.0030243	0.143012	0.152	0.04	1	TCEA2	2.51938
PRKCZ	0.00321785	0.135601	0.109	0.02	1	PRKCZ	2.49243
SNRNP40	0.00323497	0.272114	0.478	0.287	1	SNRNP40	2.49013
ZNF609	0.00328068	0.22907	0.207	0.08	1	ZNF609	2.48404
SRGN	0.00328522	0.204163	0.989	0.96	1	SRGN	2.48344
ZBTB49	0.00332004	0.145835	0.109	0.02	1	ZBTB49	2.47886
RPL23	0.00336295	0.225143	0.967	0.92	1	RPL23	2.47328
DNAJC21	0.00352383	0.312349	0.587	0.427	1	DNAJC21	2.45299
ARMH1	0.00353795	0.217063	0.239	0.1	1	ARMH1	2.45125
ZNF808	0.0035549	-0.185668	0.022	0.133	1	ZNF808	2.44917
STARD3	0.00373441	0.176087	0.293	0.133	1	STARD3	2.42778
MCM6	0.00373991	0.203239	0.315	0.153	1	MCM6	2.42714
SOD1	0.00381769	0.24312	0.957	0.867	1	SOD1	2.4182
RPL36AL	0.00389291	-0.170844	0.989	0.98	1	RPL36AL	2.40973
RPL7A	0.00391644	-0.114259	1	1	1	RPL7A	2.40711
TRAF4	0.0039641	0.112468	0.12	0.027	1	TRAF4	2.40185
OSER1	0.00396424	0.241427	0.217	0.087	1	OSER1	2.40184
ACD	0.00407946	0.10795	0.12	0.027	1	ACD	2.3894
CASP8	0.00424244	-0.319267	0.413	0.56	1	CASP8	2.37238
BBC3	0.0042722	0.212411	0.152	0.047	1	BBC3	2.36935
SAE1	0.00447345	0.254913	0.337	0.18	1	SAE1	2.34936
IDH3A	0.00484781	0.177751	0.239	0.1	1	IDH3A	2.31445
SLC39A1	0.00504118	0.238644	0.304	0.153	1	SLC39A1	2.29747
HIF1A	0.00520949	0.295264	0.598	0.44	1	HIF1A	2.28321
KCTD5	0.00524697	0.171342	0.152	0.047	1	KCTD5	2.28009
LGALS9	0.0052973	0.143802	0.359	0.173	1	LGALS9	2.27595
AAMP	0.00538074	0.183761	0.348	0.173	1	AAMP	2.26916
DNAJC18	0.00543052	0.118727	0.141	0.04	1	DNAJC18	2.26516
AC097376.2	0.0054385	0.147788	0.152	0.047	1	AC097376.2	2.26452
VGLL4	0.00547231	0.196357	0.228	0.1	1	VGLL4	2.26183
F8A1	0.00566521	0.161215	0.174	0.06	1	F8A1	2.24678
CDIP1	0.00584061	0.136759	0.152	0.047	1	CDIP1	2.23354
OSBP	0.00586566	0.185104	0.304	0.147	1	OSBP	2.23168
EIF4G1	0.0060605	0.188245	0.413	0.24	1	EIF4G1	2.21749
ACOT13	0.00625845	0.197846	0.293	0.147	1	ACOT13	2.20353
PSPC1	0.00638086	0.170547	0.359	0.2	1	PSPC1	2.19512
MRPL57	0.00667613	0.192905	0.739	0.5	1	MRPL57	2.17548
S100PBP	0.00675781	-0.220631	0.141	0.293	1	S100PBP	2.17019
ISCU	0.00683319	0.240002	0.859	0.7	1	ISCU	2.16538
RETREG2	0.00688699	0.282834	0.272	0.14	1	RETREG2	2.16197
PTPRJ	0.00701495	0.198923	0.337	0.18	1	PTPRJ	2.15398
BCL6	0.00703057	-0.163356	0.033	0.14	1	BCL6	2.15301
DEXI	0.00710269	0.164652	0.37	0.193	1	DEXI	2.14858
SMC1A	0.00743977	0.270153	0.511	0.333	1	SMC1A	2.12844
PRPS1	0.00758051	0.163739	0.315	0.153	1	PRPS1	2.1203
PHACTR4	0.00769702	0.200207	0.196	0.08	1	PHACTR4	2.11368
SEPHS2	0.00771652	0.193073	0.5	0.287	1	SEPHS2	2.11258
RPN2	0.00772344	0.191444	0.609	0.393	1	RPN2	2.11219
NDUFV2-AS1	0.007754	0.154873	0.109	0.027	1	NDUFV2-AS1	2.11047
KCTD7	0.00776021	0.173308	0.174	0.067	1	KCTD7	2.11013
44085	0.00819284	0.158451	0.272	0.127	1	44085	2.08657
ATF4	0.00826815	0.217402	0.457	0.28	1	ATF4	2.08259
SPOP	0.0085382	0.136465	0.424	0.227	1	SPOP	2.06863
PNRC2	0.0085844	-0.217885	0.326	0.5	1	PNRC2	2.06629
KCNK6	0.00881821	0.196426	0.217	0.093	1	KCNK6	2.05462
AC110769.2	0.0089007	0.0878907	0.109	0.027	1	AC110769.2	2.05058
ITGB1	0.00900727	-0.323919	0.609	0.707	1	ITGB1	2.04541
SLF1	0.00902383	-0.395094	0.228	0.353	1	SLF1	2.04461
TAB1	0.00914744	0.108746	0.109	0.027	1	TAB1	2.0387
NCOA7	0.00936146	0.202723	0.402	0.24	1	NCOA7	2.02866
TMEM200A	0.0095239	0.132569	0.13	0.04	1	TMEM200A	2.02119
FAM200A	0.00956442	0.0755357	0.12	0.033	1	FAM200A	2.01934
SLC4A7	0.00957975	-0.281109	0.185	0.32	1	SLC4A7	2.01865
QPRT	0.00973745	0.133994	0.185	0.073	1	QPRT	2.01155
GLIPR1	0.00983531	-0.336212	0.304	0.44	1	GLIPR1	2.00721
GPBP1	0.00984282	-0.215097	0.696	0.74	1	GPBP1	2.00688
PSTPIP1	0.00985261	-0.308838	0.326	0.46	1	PSTPIP1	2.00645
RPL26	0.00992698	-0.119338	1	0.993	1	RPL26	2.00318
NUP43	0.00997881	-0.237287	0.065	0.18	1	NUP43	2.00092
SPPL2A	0.0100249	0.217205	0.5	0.327	1	SPPL2A	1.99892
PGGT1B	0.0100638	0.194029	0.261	0.127	1	PGGT1B	1.99724
KIF5C	0.0102548	0.119284	0.141	0.047	1	KIF5C	1.98907
MAN1B1	0.0102895	0.17343	0.196	0.08	1	MAN1B1	1.9876
ATP13A1	0.0104873	0.118123	0.196	0.08	1	ATP13A1	1.97934
OMA1	0.0105353	0.211082	0.239	0.113	1	OMA1	1.97735
UBN2	0.010721	0.0803625	0.12	0.033	1	UBN2	1.96977
LRWD1	0.010741	0.129514	0.152	0.053	1	LRWD1	1.96896
PSMD7	0.0108416	0.242088	0.63	0.453	1	PSMD7	1.96491
CCDC115	0.0109013	0.186697	0.435	0.26	1	CCDC115	1.96252
EVA1B	0.0109162	0.20306	0.37	0.213	1	EVA1B	1.96193
RWDD4	0.0109324	0.228655	0.207	0.093	1	RWDD4	1.96128
IL21R	0.0109871	0.160628	0.25	0.12	1	IL21R	1.95912
UFM1	0.0109901	0.235932	0.402	0.253	1	UFM1	1.959
IFFO2	0.0111298	0.112462	0.13	0.04	1	IFFO2	1.95351
UQCC2	0.011284	0.220076	0.402	0.253	1	UQCC2	1.94754
RNASEH1	0.0113689	0.156464	0.239	0.113	1	RNASEH1	1.94428
UROD	0.0114411	0.11638	0.207	0.087	1	UROD	1.94153
ECE1	0.0115274	0.117771	0.196	0.08	1	ECE1	1.93827
COMT	0.0115461	0.202991	0.489	0.3	1	COMT	1.93756
PRKAG2	0.0115619	0.140867	0.239	0.113	1	PRKAG2	1.93697
NDFIP2	0.0116024	0.168847	0.457	0.28	1	NDFIP2	1.93545
RNF216	0.0117187	0.18481	0.304	0.153	1	RNF216	1.93112
DYNLL1	0.0118463	0.207606	0.902	0.853	1	DYNLL1	1.92642
PRPF38B	0.0119932	-0.293316	0.63	0.747	1	PRPF38B	1.92107
NDUFB2	0.0120448	0.26751	0.728	0.58	1	NDUFB2	1.9192
PSMC1	0.0121101	0.21541	0.533	0.353	1	PSMC1	1.91685
MRPL12	0.0121329	0.16858	0.304	0.16	1	MRPL12	1.91603
BTG1	0.012325	-0.169257	0.978	0.987	1	BTG1	1.90921
ARID5A	0.0123258	0.268806	0.685	0.513	1	ARID5A	1.90919
AC017002.3	0.0125333	0.203598	0.228	0.107	1	AC017002.3	1.90193
RICTOR	0.0126667	-0.270999	0.283	0.427	1	RICTOR	1.89734
METAP2	0.012741	0.180395	0.478	0.293	1	METAP2	1.8948
POLR2J3.1	0.0128136	-0.212787	0.598	0.727	1	POLR2J3.1	1.89233
TUBA1B	0.0128723	0.224237	0.598	0.427	1	TUBA1B	1.89034
CD46	0.0131208	0.239111	0.533	0.36	1	CD46	1.88204
IER3IP1	0.0131532	0.193883	0.38	0.22	1	IER3IP1	1.88097
ID2	0.0132528	-0.198594	0.348	0.493	1	ID2	1.87769
YRDC	0.013427	0.124656	0.228	0.1	1	YRDC	1.87202
CDV3	0.0134326	0.219594	0.804	0.64	1	CDV3	1.87184
CDR2	0.0137342	-0.25748	0.152	0.28	1	CDR2	1.8622
CASD1	0.0140014	-0.249389	0.109	0.22	1	CASD1	1.85383
SNX6	0.0141376	0.226633	0.826	0.673	1	SNX6	1.84963
APOBEC3H	0.0142551	-0.248889	0.141	0.267	1	APOBEC3H	1.84603
ATXN7L1	0.0145159	-0.185212	0.043	0.14	1	ATXN7L1	1.83816
MRPL40	0.0147001	0.192169	0.315	0.173	1	MRPL40	1.83268
TAPT1	0.0148058	0.104971	0.174	0.067	1	TAPT1	1.82957
NAA30	0.0148295	-0.162416	0.054	0.16	1	NAA30	1.82887
PGLS	0.0148345	0.181587	0.62	0.447	1	PGLS	1.82873
C19orf53	0.0149457	0.172616	0.837	0.667	1	C19orf53	1.82548
DARS	0.0150094	0.102632	0.5	0.327	1	DARS	1.82364
ITM2C	0.0150788	-0.224532	0.022	0.107	1	ITM2C	1.82163
CD38	0.0152126	0.164336	0.141	0.053	1	CD38	1.8178
PFDN2	0.0153513	0.173646	0.652	0.473	1	PFDN2	1.81385
PDHA1	0.0156949	0.168267	0.283	0.153	1	PDHA1	1.80424
FASTKD5	0.015865	-0.177271	0.043	0.14	1	FASTKD5	1.79956
LYAR	0.0162062	0.240874	0.293	0.167	1	LYAR	1.79032
STRAP	0.0162664	0.192479	0.565	0.413	1	STRAP	1.78871
ALG3	0.0163386	0.151457	0.163	0.067	1	ALG3	1.78678
NTMT1	0.016373	0.138857	0.337	0.18	1	NTMT1	1.78587
ZBTB14	0.0165451	0.196496	0.174	0.073	1	ZBTB14	1.78133
SMARCD1	0.0165809	0.176972	0.304	0.167	1	SMARCD1	1.78039
EZH1	0.0167056	-0.258595	0.141	0.273	1	EZH1	1.77714
ATP5S	0.0167098	0.197121	0.261	0.14	1	ATP5S	1.77703
TNFRSF18	0.0167207	0.364603	0.663	0.56	1	TNFRSF18	1.77674
GTF2E2	0.0167304	0.119554	0.25	0.12	1	GTF2E2	1.77649
METTL17	0.0168384	0.196535	0.272	0.147	1	METTL17	1.7737
PCYT2	0.0170168	0.130665	0.239	0.113	1	PCYT2	1.76912
PIP5K1C	0.0171671	0.13929	0.109	0.033	1	PIP5K1C	1.7653
SNRNP25	0.0172521	0.156008	0.152	0.06	1	SNRNP25	1.76316
PSME2	0.0172964	0.183605	0.902	0.853	1	PSME2	1.76204
TUBGCP6	0.0175618	0.140656	0.13	0.047	1	TUBGCP6	1.75543
JAZF1	0.0175939	0.137347	0.109	0.033	1	JAZF1	1.75464
STK16	0.0177529	0.119484	0.272	0.133	1	STK16	1.75073
ACER3	0.0178107	0.127449	0.109	0.033	1	ACER3	1.74932
MAP3K13	0.0179514	0.152243	0.13	0.047	1	MAP3K13	1.7459
DDIT4	0.0181067	0.246141	0.674	0.533	1	DDIT4	1.74216
SNRPG	0.0183287	0.196656	0.717	0.573	1	SNRPG	1.73687
OGFOD1	0.0183443	0.0984755	0.174	0.073	1	OGFOD1	1.7365
MVP	0.0183516	0.215892	0.554	0.38	1	MVP	1.73633
PARD6A	0.0184716	0.122063	0.185	0.08	1	PARD6A	1.7335
DPH7	0.0186955	0.147619	0.152	0.06	1	DPH7	1.72826
SPTSSA	0.0187024	0.109991	0.207	0.093	1	SPTSSA	1.7281
RPL22L1	0.0187918	0.216457	0.446	0.307	1	RPL22L1	1.72603
PHF2	0.0189304	0.122174	0.109	0.033	1	PHF2	1.72284
FAM160A2	0.0189304	0.111443	0.109	0.033	1	FAM160A2	1.72284
MRPS33	0.0189629	0.172273	0.457	0.287	1	MRPS33	1.7221
C16orf45	0.018965	0.127684	0.12	0.04	1	C16orf45	1.72205
PIGB	0.0191616	0.118371	0.109	0.033	1	PIGB	1.71757
TBP	0.0191662	0.127291	0.13	0.047	1	TBP	1.71746
GFER	0.0193304	0.142739	0.228	0.113	1	GFER	1.71376
ALDH16A1	0.0193785	0.130047	0.141	0.053	1	ALDH16A1	1.71268
CAMK2G	0.0195083	0.160238	0.207	0.1	1	CAMK2G	1.70978
MIS18A	0.0196314	0.126092	0.109	0.033	1	MIS18A	1.70705
NLRC5	0.019642	0.123092	0.359	0.207	1	NLRC5	1.70682
BAK1	0.0197854	0.138072	0.25	0.127	1	BAK1	1.70366
TAF9	0.0198368	0.210406	0.467	0.313	1	TAF9	1.70253
SMIM27	0.0198477	-0.231851	0.076	0.173	1	SMIM27	1.70229
MCOLN2	0.0198487	0.106436	0.185	0.08	1	MCOLN2	1.70227
LRRC45	0.01987	0.111097	0.109	0.033	1	LRRC45	1.7018
PPIA	0.0199126	0.158713	0.946	0.933	1	PPIA	1.70087
MDH1	0.0199203	0.214665	0.674	0.527	1	MDH1	1.7007
AUP1	0.0202042	0.191617	0.402	0.253	1	AUP1	1.69456
FKBP1A	0.0202248	0.249283	0.63	0.493	1	FKBP1A	1.69412
F5	0.0203125	0.120877	0.174	0.073	1	F5	1.69224
FKBP2	0.0203818	0.211188	0.554	0.407	1	FKBP2	1.69076
GLCCI1	0.0206471	0.235262	0.37	0.24	1	GLCCI1	1.68514
ITGA4	0.0207417	-0.276252	0.685	0.747	1	ITGA4	1.68316
BTLA	0.0208862	0.154848	0.293	0.153	1	BTLA	1.68014
BET1L	0.0208972	0.113231	0.13	0.047	1	BET1L	1.67991
COX7A2	0.0211851	0.18747	0.815	0.713	1	COX7A2	1.67397
SF3A3	0.0212274	0.181009	0.435	0.267	1	SF3A3	1.6731
NXT1	0.0212411	0.13491	0.261	0.133	1	NXT1	1.67282
FHL1	0.021262	0.103325	0.141	0.053	1	FHL1	1.6724
ABCB8	0.0213133	0.171848	0.196	0.093	1	ABCB8	1.67135
NFKB2	0.021869	0.20122	0.391	0.233	1	NFKB2	1.66017
MLH1	0.0218721	0.0758206	0.109	0.033	1	MLH1	1.66011
HOOK2	0.0220073	0.10668	0.163	0.067	1	HOOK2	1.65743
GART	0.0221163	0.162988	0.239	0.127	1	GART	1.65529
CIB1	0.0221658	0.141459	0.913	0.88	1	CIB1	1.65432
CHM	0.0227991	0.17823	0.239	0.127	1	CHM	1.64208
CLASP2	0.0228353	0.133653	0.141	0.053	1	CLASP2	1.64139
GPR171	0.0228874	-0.2149	0.576	0.687	1	GPR171	1.6404
IFIH1	0.023196	0.167791	0.185	0.087	1	IFIH1	1.63459
PSMC2	0.023389	0.145501	0.467	0.293	1	PSMC2	1.63099
IFITM2	0.0234514	0.197467	0.772	0.66	1	IFITM2	1.62983
PFDN1	0.0235417	0.208761	0.413	0.267	1	PFDN1	1.62816
PPIL4	0.0235478	0.217697	0.359	0.22	1	PPIL4	1.62805
ZNF587	0.0236245	-0.165337	0.043	0.133	1	ZNF587	1.62664
LACTB	0.023804	0.173662	0.185	0.087	1	LACTB	1.62335
RNF19B	0.0240012	0.0934634	0.13	0.047	1	RNF19B	1.61977
HDAC1	0.0240624	0.178867	0.511	0.367	1	HDAC1	1.61866
DNAJC16	0.0241844	0.146693	0.196	0.093	1	DNAJC16	1.61646
MCUR1	0.0242624	0.152943	0.174	0.08	1	MCUR1	1.61507
TNRC6C	0.0245915	0.165045	0.196	0.093	1	TNRC6C	1.60921
CTSL	0.0246263	0.0921265	0.457	0.307	1	CTSL	1.6086
TRMT1	0.0248481	0.173115	0.185	0.087	1	TRMT1	1.60471
COPS4	0.0250661	0.116431	0.261	0.133	1	COPS4	1.60091
AKT1	0.0251086	0.186764	0.38	0.24	1	AKT1	1.60018
RAPGEF1	0.0251895	0.14754	0.326	0.193	1	RAPGEF1	1.59878
NUP210	0.0254113	0.172418	0.413	0.26	1	NUP210	1.59497
ZNF500	0.0255639	0.0862209	0.13	0.047	1	ZNF500	1.59237
ARFIP2	0.0255917	0.113952	0.207	0.1	1	ARFIP2	1.5919
GNA15	0.0256694	0.174988	0.337	0.2	1	GNA15	1.59058
SFPQ	0.0256718	0.167192	0.848	0.673	1	SFPQ	1.59054
MBD3	0.0258486	0.13753	0.196	0.093	1	MBD3	1.58756
RBMXL1	0.0261105	-0.186095	0.076	0.173	1	RBMXL1	1.58319
DDX58	0.0261614	0.171837	0.228	0.12	1	DDX58	1.58234
GCC2	0.0263132	-0.239019	0.826	0.78	1	GCC2	1.57983
NOL7	0.0263219	0.182395	0.739	0.6	1	NOL7	1.57968
THEMIS2	0.0263764	0.125691	0.185	0.087	1	THEMIS2	1.57878
NENF	0.0265897	-0.220878	0.228	0.36	1	NENF	1.57529
FAM98B	0.0266564	-0.19588	0.13	0.247	1	FAM98B	1.5742
ZNF75A	0.026662	0.137543	0.326	0.18	1	ZNF75A	1.57411
CUL1	0.026678	0.187956	0.359	0.22	1	CUL1	1.57385
DERL1	0.0267647	0.165579	0.424	0.28	1	DERL1	1.57244
NME6	0.027331	0.164402	0.217	0.113	1	NME6	1.56334
PDPK1	0.0277952	0.153151	0.228	0.12	1	PDPK1	1.55603
PRKDC	0.0279173	-0.252787	0.38	0.473	1	PRKDC	1.55413
RPS7	0.0279396	-0.0986173	1	1	1	RPS7	1.55378
ARPC2	0.0280052	0.119365	1	0.953	1	ARPC2	1.55276
ACTA2	0.0281113	0.154417	0.239	0.127	1	ACTA2	1.55112
HIST1H1C	0.0281322	0.132167	0.359	0.213	1	HIST1H1C	1.5508
VKORC1L1	0.0285072	0.1437	0.152	0.067	1	VKORC1L1	1.54505
FTSJ3	0.0286445	0.140222	0.228	0.12	1	FTSJ3	1.54296
ASAP1	0.0287589	0.138376	0.304	0.173	1	ASAP1	1.54123
SCCPDH	0.0287727	0.141472	0.152	0.067	1	SCCPDH	1.54102
SLC52A2	0.0289494	0.125389	0.283	0.153	1	SLC52A2	1.53836
DDX19A	0.0290402	0.167118	0.152	0.067	1	DDX19A	1.537
POLR2L	0.0290867	0.20036	0.598	0.467	1	POLR2L	1.53631
TTF1	0.0291414	0.188321	0.337	0.2	1	TTF1	1.53549
TRAF7	0.0294045	0.152617	0.174	0.08	1	TRAF7	1.53159
ARID4A	0.0294367	-0.238349	0.37	0.48	1	ARID4A	1.53111
STAU1	0.0295854	0.189347	0.489	0.34	1	STAU1	1.52892
AVL9	0.0297163	0.116031	0.196	0.093	1	AVL9	1.52701
G3BP1	0.0297752	-0.249669	0.402	0.52	1	G3BP1	1.52615
ARL1	0.0303443	0.199735	0.315	0.187	1	ARL1	1.51792
GIMAP7	0.0305933	-0.119946	0.924	0.967	1	GIMAP7	1.51437
ZCCHC2	0.0307649	0.145884	0.272	0.147	1	ZCCHC2	1.51194
TRAM1	0.0308167	0.118018	0.576	0.373	1	TRAM1	1.51121
SLC35B1	0.0309404	0.11084	0.185	0.087	1	SLC35B1	1.50947
CHMP5	0.0309748	0.235856	0.489	0.34	1	CHMP5	1.50899
DNAJC9	0.0309776	-0.262685	0.13	0.233	1	DNAJC9	1.50895
OSTF1	0.0311903	0.220274	0.543	0.4	1	OSTF1	1.50598
PHF1	0.0312737	0.16278	0.304	0.18	1	PHF1	1.50482
UCHL3	0.0313673	0.142909	0.217	0.113	1	UCHL3	1.50352
STK24	0.0314664	0.177523	0.446	0.3	1	STK24	1.50215
BAG5	0.0315247	-0.207386	0.141	0.253	1	BAG5	1.50135
TINF2	0.0316997	-0.206834	0.207	0.32	1	TINF2	1.49894
PAK2	0.0317607	0.138125	0.75	0.667	1	PAK2	1.49811
PRDX2	0.0318521	0.166401	0.815	0.7	1	PRDX2	1.49686
ELMO1	0.0322111	0.163695	0.413	0.273	1	ELMO1	1.49199
FAM20B	0.0322543	0.16138	0.13	0.053	1	FAM20B	1.49141
OAZ1	0.0323187	0.125962	0.978	0.98	1	OAZ1	1.49055
CLIC3	0.0326501	-0.374633	0.065	0.16	1	CLIC3	1.48611
CYB5R4	0.032698	0.173791	0.196	0.1	1	CYB5R4	1.48548
PHF11	0.0330738	0.258645	0.402	0.273	1	PHF11	1.48052
AK6	0.033146	0.179294	0.261	0.147	1	AK6	1.47957
BRD2	0.0331933	0.192794	0.511	0.367	1	BRD2	1.47895
SFXN3	0.0332411	0.100731	0.163	0.073	1	SFXN3	1.47832
G0S2	0.0335989	0.193206	0.12	0.047	1	G0S2	1.47367
TRIR	0.0336091	0.126968	0.967	0.847	1	TRIR	1.47354
CDC37	0.0337253	0.221396	0.63	0.533	1	CDC37	1.47204
ARF5	0.0337535	0.159835	0.457	0.327	1	ARF5	1.47168
EXOSC8	0.0337549	-0.188811	0.217	0.333	1	EXOSC8	1.47166
LGMN	0.0342196	0.223811	0.13	0.053	1	LGMN	1.46573
MRPL19	0.0342394	0.109123	0.315	0.18	1	MRPL19	1.46547
NDUFB9	0.0343398	0.197354	0.598	0.433	1	NDUFB9	1.4642
DCAF11	0.0345441	0.145513	0.326	0.2	1	DCAF11	1.46163
ACADVL	0.0345753	0.165099	0.446	0.293	1	ACADVL	1.46123
TMEM19	0.034764	-0.145363	0.033	0.107	1	TMEM19	1.45887
CELF1	0.0348085	0.166386	0.348	0.22	1	CELF1	1.45831
GNG4	0.0348406	0.261454	0.293	0.18	1	GNG4	1.45791
DDX39A	0.0348761	0.173738	0.359	0.227	1	DDX39A	1.45747
PIK3CD	0.0350778	-0.205308	0.217	0.347	1	PIK3CD	1.45497
THUMPD3-AS1	0.0352415	-0.222658	0.489	0.587	1	THUMPD3-AS1	1.45295
EDARADD	0.0353731	0.135049	0.12	0.047	1	EDARADD	1.45133
SSBP3	0.0355829	0.102006	0.185	0.087	1	SSBP3	1.44876
SSSCA1	0.0356982	0.10839	0.261	0.14	1	SSSCA1	1.44735
YKT6	0.0357374	0.122669	0.12	0.047	1	YKT6	1.44688
TUBA1C	0.0358753	0.145642	0.25	0.14	1	TUBA1C	1.4452
TYK2	0.0359241	0.169952	0.174	0.087	1	TYK2	1.44461
TRMT2A	0.0359506	-0.151931	0.054	0.14	1	TRMT2A	1.44429
CCDC136	0.0361048	0.121597	0.12	0.047	1	CCDC136	1.44243
RNF146	0.0361523	0.167266	0.207	0.107	1	RNF146	1.44186
OSBPL3	0.0361823	-0.165872	0.033	0.107	1	OSBPL3	1.4415
AATF	0.0362534	0.160347	0.446	0.307	1	AATF	1.44065
MCEE	0.0366408	0.106945	0.13	0.053	1	MCEE	1.43603
ST3GAL2	0.0367129	0.128236	0.217	0.113	1	ST3GAL2	1.43518
YIPF6	0.0369414	0.186916	0.25	0.147	1	YIPF6	1.43249
NME1	0.0369659	0.120976	0.337	0.207	1	NME1	1.4322
EDEM1	0.0369779	0.143022	0.38	0.227	1	EDEM1	1.43206
ERC1	0.0371182	0.135839	0.152	0.067	1	ERC1	1.43041
RGS3	0.0371663	0.113517	0.109	0.04	1	RGS3	1.42985
POC5	0.0372266	0.134414	0.12	0.047	1	POC5	1.42915
MFSD11	0.0375357	0.0850033	0.163	0.073	1	MFSD11	1.42556
PPP4R2	0.0375891	0.245613	0.5	0.367	1	PPP4R2	1.42494
SLC2A3	0.0376049	0.111673	0.413	0.253	1	SLC2A3	1.42476
H1FX	0.0377107	-0.224584	0.717	0.78	1	H1FX	1.42354
43899	0.037905	0.106103	0.13	0.053	1	43899	1.4213
TMEM129	0.0379727	0.102283	0.109	0.04	1	TMEM129	1.42053
MOB2	0.0381054	0.0946411	0.315	0.18	1	MOB2	1.41901
ACAA1	0.0382615	0.191709	0.435	0.313	1	ACAA1	1.41724
JHY	0.0383779	0.0968192	0.12	0.047	1	JHY	1.41592
TDRD7	0.0383815	0.0929436	0.109	0.04	1	TDRD7	1.41588
NOB1	0.0386122	0.155672	0.272	0.16	1	NOB1	1.41328
PRRC2A	0.0387926	0.0937548	0.315	0.187	1	PRRC2A	1.41125
RPAP1	0.038794	0.0990312	0.109	0.04	1	RPAP1	1.41124
CHPF	0.038794	0.0984916	0.109	0.04	1	CHPF	1.41124
PYGO2	0.0391282	0.159488	0.196	0.1	1	PYGO2	1.40751
NRAS	0.0391368	0.167686	0.207	0.113	1	NRAS	1.40741
C11orf1	0.0395546	-0.107039	0.033	0.107	1	C11orf1	1.4028
FBXO31	0.0395546	-0.118332	0.033	0.107	1	FBXO31	1.4028
DCBLD1	0.0395852	0.129222	0.13	0.053	1	DCBLD1	1.40247
COPB2	0.0395999	-0.189183	0.326	0.453	1	COPB2	1.40231
MAPK8	0.0396303	0.124128	0.109	0.04	1	MAPK8	1.40197
YIPF3	0.0397851	0.188142	0.38	0.247	1	YIPF3	1.40028
IRF7	0.0398049	0.15882	0.337	0.213	1	IRF7	1.40006
MCF2L2	0.0398517	0.101032	0.152	0.067	1	MCF2L2	1.39955
ISG15	0.0399785	0.421273	0.696	0.587	1	ISG15	1.39817
LIF	0.0400541	0.112221	0.109	0.04	1	LIF	1.39735
ZNF649	0.0400541	0.0787442	0.109	0.04	1	ZNF649	1.39735
NDUFS1	0.0400673	0.197433	0.304	0.2	1	NDUFS1	1.39721
PLEKHA3	0.0403186	0.19552	0.293	0.187	1	PLEKHA3	1.39449
TNFRSF10B	0.040364	0.116908	0.12	0.047	1	TNFRSF10B	1.39401
ICA1	0.0405612	0.0963988	0.152	0.067	1	ICA1	1.39189
DENND4A	0.04074	0.0968756	0.13	0.053	1	DENND4A	1.38998
DYNC1LI1	0.0407981	0.12726	0.293	0.173	1	DYNC1LI1	1.38936
PGRMC2	0.0409992	0.11656	0.228	0.12	1	PGRMC2	1.38722
TES	0.0411731	0.120434	0.348	0.213	1	TES	1.38539
C12orf45	0.0412923	0.146053	0.228	0.12	1	C12orf45	1.38413
RASAL3	0.0413306	-0.200714	0.62	0.72	1	RASAL3	1.38373
KIF13B	0.0413311	0.1328	0.163	0.08	1	KIF13B	1.38372
OSBPL8	0.0413582	-0.216145	0.489	0.56	1	OSBPL8	1.38344
MRPL15	0.0415185	0.122799	0.228	0.127	1	MRPL15	1.38176
MFSD12	0.0415201	0.163173	0.207	0.113	1	MFSD12	1.38174
CASP1	0.0415247	0.165288	0.413	0.28	1	CASP1	1.38169
TSPOAP1-AS1	0.0417623	0.156268	0.217	0.12	1	TSPOAP1-AS1	1.37922
ZBTB33	0.0417883	0.0895225	0.109	0.04	1	ZBTB33	1.37895
KCNK5	0.042015	0.143763	0.12	0.047	1	KCNK5	1.3766
MBD6	0.042015	0.0824515	0.12	0.047	1	MBD6	1.3766
AEN	0.0422316	0.0572896	0.109	0.04	1	AEN	1.37436
FARSA	0.0422696	0.196379	0.185	0.1	1	FARSA	1.37397
C19orf70	0.0424475	0.149837	0.587	0.42	1	C19orf70	1.37215
MTHFSD	0.0424545	0.0805905	0.109	0.04	1	MTHFSD	1.37208
SCYL2	0.0426446	0.116412	0.207	0.107	1	SCYL2	1.37014
QSER1	0.0426789	0.0814541	0.109	0.04	1	QSER1	1.36979
ANP32B	0.0427999	0.167737	0.837	0.753	1	ANP32B	1.36856
ACAD9	0.0428617	0.0885786	0.12	0.047	1	ACAD9	1.36793
ESD	0.0428983	0.167982	0.522	0.373	1	ESD	1.36756
SPICE1	0.0431302	0.0850303	0.109	0.04	1	SPICE1	1.36522
CDC23	0.0431302	0.0778409	0.109	0.04	1	CDC23	1.36522
ADNP2	0.0431354	0.100981	0.13	0.053	1	ADNP2	1.36517
BUD23	0.0432415	0.124073	0.446	0.307	1	BUD23	1.3641
SH3BP1	0.0433798	0.145621	0.326	0.193	1	SH3BP1	1.36271
NDUFV1	0.04372	0.174361	0.293	0.18	1	NDUFV1	1.35932
ZNF143	0.0437738	0.194091	0.228	0.133	1	ZNF143	1.35879
TMEM128	0.0442646	-0.165124	0.076	0.167	1	TMEM128	1.35394
DHX38	0.0443478	0.142472	0.239	0.133	1	DHX38	1.35313
ACAP1	0.044437	-0.148556	0.891	0.907	1	ACAP1	1.35225
TEX261	0.0444838	0.13793	0.141	0.067	1	TEX261	1.3518
CCT3	0.0446071	0.217807	0.761	0.66	1	CCT3	1.3506
ZER1	0.0447846	0.0815884	0.141	0.06	1	ZER1	1.34887
HELQ	0.0448791	0.175724	0.141	0.067	1	HELQ	1.34796
EIF6	0.0449405	0.125522	0.446	0.3	1	EIF6	1.34736
TAP1	0.0450237	0.136172	0.685	0.553	1	TAP1	1.34656
SMIM13	0.0450418	0.0799461	0.12	0.047	1	SMIM13	1.34638
CD7	0.0451294	0.238663	0.728	0.64	1	CD7	1.34554
CASC3	0.0451535	0.157901	0.228	0.127	1	CASC3	1.34531
CMTM6	0.0453648	0.186575	0.63	0.52	1	CMTM6	1.34328
TRIM21	0.0459076	0.0939054	0.196	0.1	1	TRIM21	1.33812
MSL1	0.0459354	-0.21379	0.109	0.207	1	MSL1	1.33785
CRK	0.0459874	-0.151216	0.076	0.167	1	CRK	1.33736
TYMP	0.045991	0.164743	0.696	0.567	1	TYMP	1.33733
SAYSD1	0.0460926	0.167377	0.272	0.167	1	SAYSD1	1.33637
PGM2	0.0462444	0.110093	0.207	0.107	1	PGM2	1.33494
AKAP5	0.0463995	0.180392	0.163	0.08	1	AKAP5	1.33349
NPRL2	0.046602	0.103624	0.196	0.1	1	NPRL2	1.3316
KIFAP3	0.0466557	0.135829	0.152	0.073	1	KIFAP3	1.3311
CTSZ	0.0466678	0.122961	0.38	0.24	1	CTSZ	1.33098
PCYOX1	0.0466921	-0.134912	0.076	0.167	1	PCYOX1	1.33076
SUCLG2	0.0467446	-0.225052	0.163	0.267	1	SUCLG2	1.33027
PQLC3	0.0467517	0.144664	0.283	0.167	1	PQLC3	1.3302
GNAS	0.0468887	0.135504	0.978	0.94	1	GNAS	1.32893
ASB16-AS1	0.0470352	0.0436325	0.152	0.067	1	ASB16-AS1	1.32758
TRA2A	0.0472011	0.160778	0.337	0.22	1	TRA2A	1.32605
PLSCR1	0.0473649	0.114805	0.293	0.18	1	PLSCR1	1.32454
HLA-DMA	0.0476786	-0.203502	0.152	0.26	1	HLA-DMA	1.32168
TUBB4B	0.0476837	0.221306	0.424	0.307	1	TUBB4B	1.32163
HACL1	0.0478488	0.133213	0.207	0.113	1	HACL1	1.32013
TNFRSF1B	0.0480591	0.169879	0.652	0.493	1	TNFRSF1B	1.31822
SDHC	0.048104	-0.251532	0.261	0.353	1	SDHC	1.31782
GAPDH	0.0481705	0.168749	0.989	1	1	GAPDH	1.31722
TBXAS1	0.0482689	0.0935867	0.304	0.167	1	TBXAS1	1.31633
JMJD6	0.0483647	0.103717	0.217	0.113	1	JMJD6	1.31547
SSH1	0.0484191	-0.178136	0.065	0.147	1	SSH1	1.31498
ZNF787	0.0486757	0.142137	0.326	0.2	1	ZNF787	1.31269
CERS2	0.0487549	0.144431	0.326	0.207	1	CERS2	1.31198
SMIM7	0.0489435	-0.194659	0.283	0.393	1	SMIM7	1.3103
HPS3	0.0490767	0.144715	0.152	0.073	1	HPS3	1.30912
PRR34-AS1	0.0494687	0.110588	0.196	0.1	1	PRR34-AS1	1.30567
ASNSD1	0.0496284	0.154403	0.283	0.173	1	ASNSD1	1.30427
CCDC88B	0.0496294	0.144608	0.261	0.147	1	CCDC88B	1.30426
ATP6V0E1	0.0500626	0.132741	0.902	0.84	1	ATP6V0E1	1.30049
NFU1	0.0502053	0.119412	0.217	0.12	1	NFU1	1.29925
GBP3	0.0502492	-0.236603	0.109	0.193	1	GBP3	1.29887
ERCC1	0.050268	0.16255	0.293	0.187	1	ERCC1	1.29871
ANKRD36B	0.0502778	0.0947559	0.207	0.107	1	ANKRD36B	1.29862
ATP6V1F	0.05032	0.20407	0.641	0.52	1	ATP6V1F	1.29826
CDC25B	0.050332	0.103635	0.163	0.08	1	CDC25B	1.29816
PFDN4	0.0505351	0.110475	0.348	0.22	1	PFDN4	1.29641
MLKL	0.0506294	-0.151723	0.043	0.113	1	MLKL	1.2956
EIF3I	0.0506371	0.141951	0.717	0.547	1	EIF3I	1.29553
SRPRB	0.0507517	0.105765	0.174	0.087	1	SRPRB	1.29455
SS18	0.0507742	0.176751	0.413	0.3	1	SS18	1.29436
SDHAF3	0.0509222	0.130915	0.196	0.107	1	SDHAF3	1.29309
ABCF2.1	0.0509566	0.0973511	0.196	0.1	1	ABCF2.1	1.2928
HELZ	0.0510461	-0.181472	0.326	0.433	1	HELZ	1.29204
NABP2	0.0511783	-0.169132	0.098	0.187	1	NABP2	1.29091
CAPN10	0.0512033	0.0249368	0.141	0.06	1	CAPN10	1.2907
TIMM9	0.0512658	0.123253	0.217	0.12	1	TIMM9	1.29017
UBL3	0.0512766	-0.179742	0.13	0.233	1	UBL3	1.29008
HSD17B7	0.0515508	0.0875997	0.174	0.087	1	HSD17B7	1.28776
MBOAT7	0.0516023	0.109706	0.152	0.073	1	MBOAT7	1.28733
COPA	0.0516574	0.178231	0.37	0.253	1	COPA	1.28687
NDUFB3	0.0519023	0.202172	0.696	0.573	1	NDUFB3	1.28481
EGLN1	0.0519027	-0.155111	0.098	0.187	1	EGLN1	1.28481
LSM14B	0.0519543	0.108275	0.174	0.087	1	LSM14B	1.28438
LARP7	0.0519644	0.156656	0.522	0.38	1	LARP7	1.28429
IKBKG	0.0519831	0.133778	0.217	0.12	1	IKBKG	1.28414
NAA15	0.0524057	-0.208437	0.141	0.233	1	NAA15	1.28062
ATXN2L	0.0524635	0.0896051	0.304	0.187	1	ATXN2L	1.28014
EIF3E	0.0526191	0.136736	0.87	0.76	1	EIF3E	1.27886
DCAF7	0.0527513	0.12657	0.348	0.213	1	DCAF7	1.27777
TCHP	0.0529663	0.106812	0.25	0.14	1	TCHP	1.276
TMEM222	0.0530053	0.0779981	0.217	0.113	1	TMEM222	1.27568
MFSD14B	0.0532478	0.103727	0.163	0.08	1	MFSD14B	1.2737
GABPB1-AS1	0.05357	0.143401	0.576	0.427	1	GABPB1-AS1	1.27108
BABAM1	0.0543187	-0.235814	0.261	0.34	1	BABAM1	1.26505
LDLRAP1	0.0543601	0.155339	0.196	0.107	1	LDLRAP1	1.26472
POLR2J	0.0545609	0.123841	0.587	0.467	1	POLR2J	1.26312
DCTN6	0.0546119	0.131253	0.25	0.147	1	DCTN6	1.26271
ATP6V1H	0.054841	0.141645	0.196	0.1	1	ATP6V1H	1.26089
RARS2	0.0548478	0.111687	0.272	0.16	1	RARS2	1.26084
CD5	0.0550681	0.160516	0.435	0.293	1	CD5	1.2591
UHMK1	0.0551388	0.101355	0.402	0.247	1	UHMK1	1.25854
ING5	0.0552369	0.139386	0.272	0.167	1	ING5	1.25777
CCDC6	0.0553172	0.138635	0.25	0.147	1	CCDC6	1.25714
STX5	0.0553172	0.133722	0.25	0.147	1	STX5	1.25714
PDCD2	0.055345	0.190822	0.554	0.42	1	PDCD2	1.25692
ABRAXAS1	0.0554702	0.147756	0.185	0.1	1	ABRAXAS1	1.25594
FASTK	0.0555876	0.124965	0.283	0.167	1	FASTK	1.25502
MX1	0.0557327	0.236283	0.283	0.173	1	MX1	1.25389
MRPS28	0.0558774	0.106938	0.13	0.06	1	MRPS28	1.25276
RBM6	0.0559984	0.144485	0.543	0.387	1	RBM6	1.25182
PGK1	0.0560013	0.126672	0.826	0.707	1	PGK1	1.2518
ARHGAP21	0.056053	0.0931616	0.152	0.073	1	ARHGAP21	1.2514
RSBN1L	0.0560901	-0.186018	0.511	0.593	1	RSBN1L	1.25111
RAB4A	0.0563682	0.107181	0.37	0.247	1	RAB4A	1.24897
AKTIP	0.0564737	-0.207718	0.228	0.34	1	AKTIP	1.24815
RPE	0.0565151	0.121877	0.152	0.073	1	RPE	1.24784
KCNN4	0.0565925	0.119315	0.239	0.14	1	KCNN4	1.24724
H2AFY	0.0565929	0.113765	0.522	0.36	1	H2AFY	1.24724
ANKIB1	0.0567079	-0.12073	0.065	0.147	1	ANKIB1	1.24636
NELFCD	0.0568544	0.112269	0.37	0.24	1	NELFCD	1.24524
EXOSC10	0.0569313	0.111374	0.207	0.113	1	EXOSC10	1.24465
MAPKAPK3	0.056942	0.112719	0.326	0.207	1	MAPKAPK3	1.24457
MCRIP2	0.0569804	0.096852	0.152	0.073	1	MCRIP2	1.24427
MAP3K4	0.0573306	0.153361	0.207	0.113	1	MAP3K4	1.24161
MEF2D	0.0573306	0.117426	0.207	0.113	1	MEF2D	1.24161
TRUB2	0.0574216	-0.164098	0.076	0.153	1	TRUB2	1.24092
MRPL18	0.0574924	0.19305	0.457	0.353	1	MRPL18	1.24039
METTL26	0.05766	0.13983	0.598	0.433	1	METTL26	1.23913
UBE2D1	0.0577003	0.0800916	0.141	0.067	1	UBE2D1	1.23882
KCMF1	0.0577417	0.10153	0.315	0.193	1	KCMF1	1.23851
CCDC124	0.0577793	0.0906279	0.293	0.18	1	CCDC124	1.23823
EMC6	0.0578079	-0.19942	0.446	0.513	1	EMC6	1.23801
NSFL1C	0.0580899	0.100922	0.228	0.127	1	NSFL1C	1.2359
PARP14	0.0581081	-0.209414	0.446	0.533	1	PARP14	1.23576
CEP63	0.0581361	0.142531	0.207	0.113	1	CEP63	1.23555
CPPED1	0.0581919	0.118723	0.141	0.067	1	CPPED1	1.23514
C5orf24	0.0585111	0.104696	0.337	0.22	1	C5orf24	1.23276
STK38	0.0585213	-0.243171	0.12	0.2	1	STK38	1.23269
UMPS	0.0586868	0.121517	0.141	0.067	1	UMPS	1.23146
NFIC	0.0587463	0.11505	0.207	0.113	1	NFIC	1.23102
MTX2	0.0588292	0.141563	0.185	0.1	1	MTX2	1.23041
PGM1	0.0590375	0.082513	0.163	0.08	1	PGM1	1.22887
WDFY1	0.0591853	0.11921	0.141	0.067	1	WDFY1	1.22779
DENND1C	0.0591861	0.169277	0.261	0.16	1	DENND1C	1.22778
SUMF2	0.059288	0.152923	0.435	0.293	1	SUMF2	1.22703
LTN1	0.0593281	0.0771317	0.348	0.213	1	LTN1	1.22674
RHOT1	0.059355	0.11841	0.152	0.073	1	RHOT1	1.22654
DALRD3	0.0595526	0.159632	0.261	0.16	1	DALRD3	1.2251
ALKBH7	0.0595648	0.190932	0.543	0.413	1	ALKBH7	1.22501
GCA	0.0595695	0.13986	0.12	0.053	1	GCA	1.22498
VPS16	0.05986	0.0434744	0.207	0.107	1	VPS16	1.22286
USP8	0.0599169	0.159707	0.446	0.3	1	USP8	1.22245
RRP7A	0.0599319	0.152253	0.478	0.34	1	RRP7A	1.22234
RFWD3	0.0599725	-0.139106	0.043	0.113	1	RFWD3	1.22205
KLRB1	0.060046	-0.211656	0.576	0.633	1	KLRB1	1.22152
WWP2	0.0603276	0.0992243	0.152	0.073	1	WWP2	1.21948
ZMAT2	0.0603477	0.137351	0.565	0.413	1	ZMAT2	1.21934
TMEM115	0.060367	-0.125387	0.076	0.16	1	TMEM115	1.2192
DNAJC13	0.0604453	-0.161423	0.065	0.14	1	DNAJC13	1.21864
ZNF445	0.0605015	0.161865	0.13	0.06	1	ZNF445	1.21823
ANKRD12	0.0605429	-0.130433	0.902	0.953	1	ANKRD12	1.21794
BLOC1S1	0.0605644	0.177268	0.696	0.567	1	BLOC1S1	1.21778
PPAN	0.0605953	0.0807993	0.174	0.087	1	PPAN	1.21756
IQCG	0.0606753	0.124548	0.12	0.053	1	IQCG	1.21699
ATP6V1B2	0.060855	0.0994286	0.228	0.127	1	ATP6V1B2	1.2157
DIS3	0.0609635	0.175235	0.337	0.233	1	DIS3	1.21493
B3GALNT2	0.0610343	0.121061	0.13	0.06	1	B3GALNT2	1.21443
HCCS	0.0611283	-0.167704	0.087	0.167	1	HCCS	1.21376
NCDN	0.0611283	-0.205302	0.087	0.167	1	NCDN	1.21376
PLCG2	0.0612145	0.108561	0.141	0.067	1	PLCG2	1.21315
USP37	0.0612145	0.0956621	0.141	0.067	1	USP37	1.21315
DNAJA2	0.0615332	-0.200068	0.543	0.633	1	DNAJA2	1.21089
MRPS5	0.0615435	0.160627	0.413	0.3	1	MRPS5	1.21082
MUC20-OT1	0.0616494	0.130316	0.402	0.26	1	MUC20-OT1	1.21007
GTPBP8	0.0616647	0.0990056	0.228	0.127	1	GTPBP8	1.20996
CEBPZOS	0.0617747	-0.181652	0.196	0.293	1	CEBPZOS	1.20919
HTATIP2	0.0620913	0.195112	0.391	0.28	1	HTATIP2	1.20697
RPL35	0.0621535	0.0763878	0.989	0.993	1	RPL35	1.20653
PLPBP	0.0621978	0.132991	0.293	0.187	1	PLPBP	1.20623
ZBTB7A	0.0622087	0.162504	0.424	0.307	1	ZBTB7A	1.20615
RABAC1	0.0622834	-0.198723	0.707	0.733	1	RABAC1	1.20563
COMMD7	0.0628037	-0.226973	0.326	0.413	1	COMMD7	1.20201
IRF3	0.0629575	-0.210057	0.5	0.58	1	IRF3	1.20095
RASA2	0.0629939	-0.181376	0.13	0.22	1	RASA2	1.2007
B4GALT3	0.063311	0.0982887	0.228	0.127	1	B4GALT3	1.19852
LRRC58	0.063322	0.138271	0.261	0.16	1	LRRC58	1.19845
ZNF44	0.0635535	-0.116122	0.076	0.16	1	ZNF44	1.19686
PPFIA1	0.0635917	-0.218652	0.13	0.213	1	PPFIA1	1.1966
TIMMDC1	0.0635919	0.143456	0.457	0.32	1	TIMMDC1	1.1966
GALNT2	0.063757	0.110195	0.13	0.06	1	GALNT2	1.19547
NINJ2	0.0642302	0.164603	0.272	0.173	1	NINJ2	1.19226
ELP3	0.0643508	0.0894708	0.152	0.073	1	ELP3	1.19145
KARS	0.064378	0.115302	0.359	0.233	1	KARS	1.19126
YBX1	0.0645021	0.0743422	0.924	0.913	1	YBX1	1.19043
AGO3	0.0647703	0.158324	0.293	0.187	1	AGO3	1.18862
LRRC8B	0.0648739	0.0945507	0.13	0.06	1	LRRC8B	1.18793
FCHO1	0.0648739	0.0942073	0.13	0.06	1	FCHO1	1.18793
TSC22D3	0.064884	0.102855	0.261	0.16	1	TSC22D3	1.18786
RNF4	0.0649512	0.166459	0.283	0.18	1	RNF4	1.18741
CD52	0.0649538	-0.141909	0.826	0.893	1	CD52	1.1874
CCDC92	0.0653403	0.0719164	0.163	0.08	1	CCDC92	1.18482
AL135925.1	0.0654459	0.0957802	0.141	0.067	1	AL135925.1	1.18412
INTS11	0.0654723	-0.156967	0.152	0.253	1	INTS11	1.18394
ZC3H12D	0.0656002	0.114167	0.239	0.14	1	ZC3H12D	1.1831
ARF4	0.0656593	0.134613	0.435	0.28	1	ARF4	1.1827
MAX	0.0657572	0.12918	0.391	0.267	1	MAX	1.18206
RANGAP1	0.0662338	0.203047	0.25	0.16	1	RANGAP1	1.17892
DMAC2	0.066247	0.0635097	0.25	0.14	1	DMAC2	1.17883
EPS15L1	0.0663576	-0.177655	0.065	0.14	1	EPS15L1	1.17811
PYCARD	0.0664399	-0.201594	0.413	0.487	1	PYCARD	1.17757
IFI27L1	0.0664619	0.0818776	0.12	0.053	1	IFI27L1	1.17743
PHF20	0.0664751	0.0913925	0.446	0.307	1	PHF20	1.17734
ABCA5	0.0665793	0.0938481	0.13	0.06	1	ABCA5	1.17666
FURIN	0.0666052	0.269283	0.38	0.273	1	FURIN	1.17649
RNF167	0.0666938	0.140469	0.391	0.28	1	RNF167	1.17591
NCOA4	0.0668075	0.126821	0.337	0.227	1	NCOA4	1.17517
SOCS1	0.0670135	0.241133	0.717	0.62	1	SOCS1	1.17384
APOOL	0.0670648	0.141463	0.12	0.053	1	APOOL	1.17351
MTHFS	0.0670648	0.106666	0.12	0.053	1	MTHFS	1.17351
OST4	0.0671173	0.115904	0.935	0.893	1	OST4	1.17317
MUM1	0.0672328	-0.177738	0.152	0.24	1	MUM1	1.17242
DPH3	0.0672551	0.0954292	0.25	0.147	1	DPH3	1.17227
TRIM16	0.0675078	-0.197326	0.043	0.107	1	TRIM16	1.17065
MALAT1	0.0677873	-0.0961097	1	1	1	MALAT1	1.16885
FMC1	0.0678058	-0.12514	0.109	0.2	1	FMC1	1.16873
R3HCC1	0.0678313	0.128598	0.207	0.12	1	R3HCC1	1.16857
GPCPD1	0.06789	0.100246	0.174	0.093	1	GPCPD1	1.16819
SLC25A1	0.0680235	0.134541	0.217	0.127	1	SLC25A1	1.16734
IDH3G	0.0680282	0.171717	0.457	0.333	1	IDH3G	1.16731
HIVEP1	0.068094	0.0961525	0.207	0.113	1	HIVEP1	1.16689
BDH2	0.0681874	0.0861629	0.196	0.107	1	BDH2	1.1663
MMAB	0.068284	0.0822766	0.12	0.053	1	MMAB	1.16568
COTL1	0.0683374	0.136122	0.957	0.94	1	COTL1	1.16534
CITED2	0.0684201	-0.173441	0.174	0.273	1	CITED2	1.16482
GRAMD4	0.0686006	0.0834085	0.109	0.047	1	GRAMD4	1.16367
APPL2	0.0686964	0.140583	0.163	0.087	1	APPL2	1.16307
FAM120A	0.0688107	0.130916	0.402	0.267	1	FAM120A	1.16234
SLC41A1	0.0689005	0.103222	0.12	0.053	1	SLC41A1	1.16178
ARL8B	0.0689512	0.156198	0.228	0.14	1	ARL8B	1.16146
ACSL6	0.0689578	-0.178008	0.065	0.14	1	ACSL6	1.16142
DGKE	0.0689979	0.125379	0.239	0.14	1	DGKE	1.16116
TIMM13	0.0691418	0.163013	0.326	0.227	1	TIMM13	1.16026
MYO1F	0.0692868	-0.164257	0.326	0.46	1	MYO1F	1.15935
NAALADL1	0.0693436	0.0792224	0.141	0.067	1	NAALADL1	1.15899
ACSL5	0.0694493	-0.125361	0.087	0.167	1	ACSL5	1.15833
ATP1A1	0.06954	0.109871	0.413	0.273	1	ATP1A1	1.15777
AC004951.1	0.0696712	0.12691	0.207	0.12	1	AC004951.1	1.15695
CD96	0.0696727	-0.229318	0.391	0.507	1	CD96	1.15694
FYTTD1	0.0697329	0.128417	0.391	0.267	1	FYTTD1	1.15656
REL	0.0698016	0.119387	0.457	0.327	1	REL	1.15613
SYNJ1	0.0698016	0.0980183	0.13	0.06	1	SYNJ1	1.15613
NAP1L1	0.069896	0.163782	0.75	0.7	1	NAP1L1	1.15555
DHRSX	0.070101	0.0631677	0.13	0.06	1	DHRSX	1.15428
EXOSC6	0.0701259	0.0838233	0.37	0.24	1	EXOSC6	1.15412
PGBD2	0.070147	0.0950256	0.12	0.053	1	PGBD2	1.15399
CEP95	0.0701616	-0.16838	0.076	0.153	1	CEP95	1.1539
MTX1	0.0703822	0.0472697	0.261	0.153	1	MTX1	1.15254
RNF126	0.0708772	0.139748	0.326	0.213	1	RNF126	1.14949
OFD1	0.0710255	0.170775	0.457	0.333	1	OFD1	1.14859
NDUFS3	0.0710461	0.16389	0.511	0.4	1	NDUFS3	1.14846
CALCOCO1	0.0711193	0.0778431	0.272	0.167	1	CALCOCO1	1.14801
LAGE3	0.0712639	0.14653	0.424	0.307	1	LAGE3	1.14713
ACTB	0.0714239	0.100909	0.989	1	1	ACTB	1.14616
DPY30	0.0715191	0.123874	0.511	0.367	1	DPY30	1.14558
CXXC1	0.0715961	0.136321	0.163	0.087	1	CXXC1	1.14511
MRPS11	0.0718586	0.0934665	0.37	0.247	1	MRPS11	1.14352
SS18L2	0.0719066	-0.184515	0.457	0.533	1	SS18L2	1.14323
SORD	0.0719092	0.088768	0.109	0.047	1	SORD	1.14322
SAP25	0.0719092	0.0858155	0.109	0.047	1	SAP25	1.14322
BAZ1B	0.0719628	-0.148978	0.413	0.487	1	BAZ1B	1.14289
ADTRP	0.0720515	0.0542722	0.12	0.053	1	ADTRP	1.14236
ABR	0.0721256	-0.203232	0.098	0.173	1	ABR	1.14191
ZNF264	0.0721367	0.100136	0.217	0.127	1	ZNF264	1.14184
TAZ	0.072195	-0.203328	0.087	0.16	1	TAZ	1.14149
PSMD2	0.0722006	0.13777	0.489	0.347	1	PSMD2	1.14146
SMAD1	0.0725864	0.110306	0.109	0.047	1	SMAD1	1.13914
SEC22B	0.0726535	-0.226399	0.261	0.34	1	SEC22B	1.13874
CDYL2	0.0726957	0.0831632	0.12	0.053	1	CDYL2	1.13849
STAT5A	0.0727146	0.133331	0.283	0.18	1	STAT5A	1.13838
MED30	0.0728411	0.111052	0.207	0.113	1	MED30	1.13762
ARFRP1	0.0729118	0.118089	0.304	0.187	1	ARFRP1	1.1372
SLC25A11	0.0729189	0.161709	0.391	0.273	1	SLC25A11	1.13716
TBX21	0.0731513	0.0745179	0.13	0.06	1	TBX21	1.13578
HOXB4	0.0732687	0.083029	0.109	0.047	1	HOXB4	1.13508
BCAT1	0.0733446	0.0696392	0.12	0.053	1	BCAT1	1.13463
KIAA0355	0.0735526	0.10832	0.174	0.093	1	KIAA0355	1.1334
RTF1	0.0735991	0.158877	0.576	0.44	1	RTF1	1.13313
ATP6V0B	0.0737625	0.16103	0.565	0.447	1	ATP6V0B	1.13216
HOTAIRM1	0.0738097	0.13196	0.152	0.08	1	HOTAIRM1	1.13189
AC137767.1	0.0739563	0.0770853	0.109	0.047	1	AC137767.1	1.13102
NINJ1	0.0740152	0.0741434	0.315	0.2	1	NINJ1	1.13068
METTL13	0.074317	-0.157811	0.098	0.18	1	METTL13	1.12891
IST1	0.0744741	-0.203819	0.174	0.26	1	IST1	1.128
LRP10	0.0744989	0.0797022	0.554	0.413	1	LRP10	1.12785
RNF207	0.0746329	-0.132736	0.054	0.12	1	RNF207	1.12707
STAM	0.0748347	-0.131358	0.12	0.207	1	STAM	1.1259
POM121C	0.0749431	0.12122	0.207	0.12	1	POM121C	1.12527
TSG101	0.0750284	0.117589	0.467	0.333	1	TSG101	1.12477
SDHAF1	0.0751049	0.112401	0.293	0.187	1	SDHAF1	1.12433
MICU1	0.0752411	0.135727	0.152	0.08	1	MICU1	1.12354
SUDS3	0.075249	0.118353	0.272	0.173	1	SUDS3	1.1235
PATL1	0.0753197	0.0782052	0.12	0.053	1	PATL1	1.12309
PIAS1	0.0755267	0.159147	0.315	0.213	1	PIAS1	1.1219
FOXN2	0.0755394	0.140757	0.228	0.14	1	FOXN2	1.12183
BANP	0.0756215	-0.193586	0.098	0.173	1	BANP	1.12135
BORCS5	0.0756276	0.113992	0.25	0.153	1	BORCS5	1.12132
NCSTN	0.0758329	0.0911159	0.185	0.1	1	NCSTN	1.12014
SH3BGRL3	0.076154	-0.127159	1	1	1	SH3BGRL3	1.11831
MGA	0.0762779	0.124728	0.261	0.16	1	MGA	1.1176
MEMO1	0.0765565	0.12086	0.163	0.087	1	MEMO1	1.11602
SERGEF	0.0766371	0.0844457	0.196	0.107	1	SERGEF	1.11556
SETD4	0.0767597	0.0786144	0.109	0.047	1	SETD4	1.11487
MTRR	0.0768996	0.149934	0.141	0.073	1	MTRR	1.11408
COX17	0.0769908	0.141733	0.543	0.407	1	COX17	1.11356
RNF14	0.077338	0.056349	0.12	0.053	1	RNF14	1.11161
GSR	0.077353	0.0878265	0.174	0.093	1	GSR	1.11152
TADA2A	0.077711	-0.148532	0.054	0.12	1	TADA2A	1.10952
FCHSD1	0.0781936	0.0753677	0.109	0.047	1	FCHSD1	1.10683
FIS1	0.0784958	0.0868124	0.63	0.473	1	FIS1	1.10515
AC245297.3	0.0785439	0.111981	0.446	0.307	1	AC245297.3	1.10489
WDR18	0.0785969	0.169252	0.239	0.153	1	WDR18	1.10459
YBEY	0.0787269	0.138004	0.196	0.113	1	YBEY	1.10388
CLINT1	0.0787371	-0.210754	0.25	0.347	1	CLINT1	1.10382
NDUFB7	0.0791175	0.103459	0.717	0.573	1	NDUFB7	1.10173
FBXO45	0.079137	-0.147535	0.12	0.2	1	FBXO45	1.10162
MRE11	0.0791395	0.20018	0.163	0.093	1	MRE11	1.10161
AFF4	0.0794515	-0.216699	0.185	0.28	1	AFF4	1.0999
PURB	0.0796328	0.102109	0.228	0.133	1	PURB	1.09891
ZBTB43	0.0796491	0.0577251	0.109	0.047	1	ZBTB43	1.09882
FOXN3	0.0797111	0.157355	0.348	0.233	1	FOXN3	1.09848
FAM172A	0.0799512	0.122003	0.261	0.16	1	FAM172A	1.09717
RPL14	0.0799888	-0.0865348	1	1	1	RPL14	1.09697
DIDO1	0.0800092	-0.242116	0.25	0.32	1	DIDO1	1.09686
EXOC8	0.0802472	-0.136449	0.054	0.12	1	EXOC8	1.09557
SNRNP48	0.0803851	0.0570885	0.109	0.047	1	SNRNP48	1.09482
TIA1	0.0805853	-0.171918	0.174	0.267	1	TIA1	1.09374
CCDC127	0.0807366	0.0860888	0.174	0.093	1	CCDC127	1.09293
CDADC1	0.0807995	0.0697792	0.12	0.053	1	CDADC1	1.09259
PRDX5	0.0808574	0.157553	0.696	0.553	1	PRDX5	1.09228
ZFP36L2	0.0810116	-0.185535	0.87	0.88	1	ZFP36L2	1.09145
ZRSR2	0.0810515	0.106328	0.239	0.14	1	ZRSR2	1.09124
YWHAZ	0.0811655	0.108277	0.902	0.78	1	YWHAZ	1.09063
ARID1A	0.0812394	0.157919	0.424	0.3	1	ARID1A	1.09023
HDAC7	0.0816413	-0.146555	0.12	0.2	1	HDAC7	1.08809
C6orf48	0.0816876	-0.196833	0.402	0.5	1	C6orf48	1.08784
IMPAD1	0.0818099	-0.152243	0.065	0.133	1	IMPAD1	1.08719
PRKRIP1	0.0818356	-0.177534	0.109	0.187	1	PRKRIP1	1.08706
TFCP2	0.0822073	0.142586	0.174	0.1	1	TFCP2	1.08509
ATP5F1B	0.0822985	-0.154264	0.565	0.607	1	ATP5F1B	1.08461
CHUK	0.0823587	-0.115617	0.043	0.107	1	CHUK	1.08429
AL031846.2	0.0823587	-0.116636	0.043	0.107	1	AL031846.2	1.08429
SLC9A3R1	0.0827273	-0.128712	0.391	0.493	1	SLC9A3R1	1.08235
CHD6	0.0828309	-0.170668	0.163	0.253	1	CHD6	1.08181
MAP3K14	0.083028	0.120046	0.196	0.113	1	MAP3K14	1.08078
PITPNB	0.0830943	-0.153313	0.239	0.333	1	PITPNB	1.08043
CARD11	0.083186	0.155166	0.141	0.073	1	CARD11	1.07995
SNHG12	0.083418	-0.188628	0.152	0.24	1	SNHG12	1.07874
HSP90B1	0.0836413	-0.171195	0.5	0.573	1	HSP90B1	1.07758
TCF12	0.0836471	0.0902318	0.174	0.093	1	TCF12	1.07755
IL21-AS1	0.0836585	0.0616116	0.12	0.053	1	IL21-AS1	1.07749
WDR36	0.08368	-0.146143	0.065	0.133	1	WDR36	1.07738
CREM	0.0837031	0.231343	0.62	0.46	1	CREM	1.07726
MRPL49	0.0841086	0.0916193	0.217	0.127	1	MRPL49	1.07516
NUCKS1	0.0844109	-0.155743	0.717	0.727	1	NUCKS1	1.0736
KRIT1	0.0844457	-0.1821	0.228	0.313	1	KRIT1	1.07342
COX6A1	0.0847317	0.131792	0.837	0.773	1	COX6A1	1.07195
RRAS	0.0848349	0.097006	0.174	0.093	1	RRAS	1.07143
ICE1	0.0848674	0.165462	0.283	0.193	1	ICE1	1.07126
ADK	0.0849191	-0.15326	0.13	0.213	1	ADK	1.07099
LINC01281	0.0849458	0.104903	0.152	0.08	1	LINC01281	1.07086
MRPL3	0.084993	0.168005	0.326	0.213	1	MRPL3	1.07062
LYPLAL1	0.0853514	0.0633928	0.196	0.107	1	LYPLAL1	1.06879
R3HDM2	0.0853708	0.125903	0.37	0.26	1	R3HDM2	1.06869
EPHA1-AS1	0.085574	-0.161384	0.109	0.187	1	EPHA1-AS1	1.06766
DDX17	0.085881	-0.14109	0.859	0.927	1	DDX17	1.0661
ZNF600	0.0859146	-0.102562	0.043	0.107	1	ZNF600	1.06593
PSEN1	0.0859463	-0.132348	0.087	0.167	1	PSEN1	1.06577
AHNAK	0.0866887	-0.251762	0.435	0.52	1	AHNAK	1.06204
QTRT1	0.0866893	0.0704092	0.163	0.087	1	QTRT1	1.06203
HSD17B12	0.0867619	0.066267	0.185	0.1	1	HSD17B12	1.06167
GMEB1	0.0867948	-0.146954	0.109	0.193	1	GMEB1	1.06151
GFPT1	0.0868736	0.093182	0.152	0.08	1	GFPT1	1.06111
CRYL1	0.0868736	-0.138009	0.065	0.133	1	CRYL1	1.06111
PSMD12	0.0868741	0.140618	0.467	0.327	1	PSMD12	1.06111
ARPC1A	0.0873073	0.153189	0.337	0.233	1	ARPC1A	1.05895
AGPAT1	0.0873175	0.0713437	0.163	0.087	1	AGPAT1	1.0589
PRKCSH	0.0877874	0.120914	0.261	0.167	1	PRKCSH	1.05657
RUVBL1	0.0878618	0.119814	0.348	0.233	1	RUVBL1	1.0562
BANF1	0.0880846	0.137696	0.63	0.473	1	BANF1	1.0551
GALNT11	0.0880923	-0.141739	0.098	0.173	1	GALNT11	1.05506
ERV3-1	0.0881687	0.10364	0.141	0.073	1	ERV3-1	1.05469
C2orf74	0.0882505	0.0740283	0.185	0.1	1	C2orf74	1.05428
FAM111A	0.0882962	-0.193976	0.261	0.347	1	FAM111A	1.05406
RBM23	0.0883815	0.146725	0.283	0.187	1	RBM23	1.05364
TOMM7	0.0887906	-0.11846	0.935	0.933	1	TOMM7	1.05163
RPL15	0.0888365	0.069484	1	1	1	RPL15	1.05141
PAFAH1B3	0.0888821	0.100523	0.185	0.107	1	PAFAH1B3	1.05119
SSH2	0.0892831	-0.195406	0.13	0.207	1	SSH2	1.04923
CIR1	0.089296	0.181224	0.467	0.367	1	CIR1	1.04917
IVD	0.089333	-0.185753	0.087	0.153	1	IVD	1.04899
ELOVL1	0.0895419	-0.17072	0.12	0.2	1	ELOVL1	1.04797
LAP3	0.0895594	0.13816	0.359	0.253	1	LAP3	1.04789
IL2RA	0.0895793	0.247406	0.217	0.133	1	IL2RA	1.04779
ARFGAP2	0.0896883	0.109342	0.37	0.26	1	ARFGAP2	1.04726
UHRF2	0.0901093	-0.124149	0.109	0.193	1	UHRF2	1.04523
AZIN1	0.0901318	0.114949	0.239	0.147	1	AZIN1	1.04512
CFL2	0.0901648	0.135524	0.152	0.08	1	CFL2	1.04496
GPR137	0.0901648	0.0890198	0.152	0.08	1	GPR137	1.04496
CUL4A	0.0902975	-0.166637	0.109	0.187	1	CUL4A	1.04432
PJA2	0.0903147	0.147046	0.522	0.413	1	PJA2	1.04424
NEK7	0.0903199	0.116581	0.261	0.167	1	NEK7	1.04422
CASP2	0.0904109	-0.158781	0.12	0.193	1	CASP2	1.04378
RPL13A	0.0906252	-0.0745913	1	1	1	RPL13A	1.04275
SENP5	0.0909924	0.0933075	0.207	0.12	1	SENP5	1.04099
EPB41L4A-AS1	0.09127	-0.131953	0.152	0.247	1	EPB41L4A-AS1	1.03967
ASNS	0.0912724	0.0986456	0.141	0.073	1	ASNS	1.03966
RAP2B	0.0915863	-0.186552	0.228	0.32	1	RAP2B	1.03817
ZBTB6	0.0916135	0.0643616	0.174	0.093	1	ZBTB6	1.03804
YLPM1	0.0918622	0.0915437	0.207	0.12	1	YLPM1	1.03686
TNFRSF4	0.0919168	0.0366513	0.685	0.6	1	TNFRSF4	1.03661
RSRC2	0.0920212	-0.226112	0.576	0.613	1	RSRC2	1.03611
IPO7	0.0921043	0.123317	0.272	0.167	1	IPO7	1.03572
SF3B2	0.0921778	-0.14904	0.511	0.593	1	SF3B2	1.03537
SPSB1	0.0921872	0.0876604	0.152	0.08	1	SPSB1	1.03533
TBC1D14	0.0924769	0.0889299	0.163	0.087	1	TBC1D14	1.03397
ZFP90	0.0925848	-0.147015	0.076	0.147	1	ZFP90	1.03346
SCRN2	0.0926796	0.122027	0.141	0.073	1	SCRN2	1.03302
NOTCH2	0.0928004	0.0732756	0.196	0.113	1	NOTCH2	1.03245
PLEKHA1	0.0928694	0.0802294	0.152	0.08	1	PLEKHA1	1.03213
WDR20	0.0928915	0.0633382	0.174	0.093	1	WDR20	1.03202
DCUN1D5	0.093136	0.10655	0.304	0.2	1	DCUN1D5	1.03088
NDUFB4	0.0932331	0.105031	0.587	0.453	1	NDUFB4	1.03043
PLEKHF2	0.0932371	-0.132024	0.076	0.147	1	PLEKHF2	1.03041
CXCR6	0.0933401	-0.370332	0.196	0.293	1	CXCR6	1.02993
MT-ND5	0.093361	-0.104343	0.978	0.98	1	MT-ND5	1.02983
RB1CC1	0.0934808	-0.185742	0.326	0.393	1	RB1CC1	1.02928
JKAMP	0.0934906	0.129663	0.304	0.193	1	JKAMP	1.02923
USP10	0.0936444	0.186641	0.228	0.147	1	USP10	1.02852
FABP5	0.0939258	0.561303	0.261	0.173	1	FABP5	1.02722
DRAIC	0.0942014	0.179401	0.228	0.147	1	DRAIC	1.02594
WAS	0.0943623	0.0934165	0.522	0.387	1	WAS	1.0252
SMARCAD1	0.0944848	0.0747473	0.239	0.147	1	SMARCAD1	1.02464
DIP2A	0.0946793	0.189827	0.326	0.227	1	DIP2A	1.02374
TFRC	0.0948722	0.192981	0.293	0.207	1	TFRC	1.02286
FAM53B	0.0949225	0.118109	0.196	0.113	1	FAM53B	1.02263
MAIP1	0.0949403	0.0823452	0.152	0.08	1	MAIP1	1.02255
SLC1A4	0.0949403	-0.14552	0.065	0.133	1	SLC1A4	1.02255
PSMG2	0.0953825	0.144474	0.554	0.433	1	PSMG2	1.02053
ATPAF2	0.0954809	0.086241	0.13	0.067	1	ATPAF2	1.02008
PRF1	0.0955989	-0.171907	0.13	0.213	1	PRF1	1.01955
DENR	0.0958285	-0.170142	0.272	0.373	1	DENR	1.01851
CRNKL1	0.0960946	0.0538199	0.196	0.107	1	CRNKL1	1.0173
GNL3L	0.0961639	-0.0925165	0.054	0.12	1	GNL3L	1.01699
MED10	0.0962371	0.180123	0.402	0.313	1	MED10	1.01666
LINC01871	0.0965858	-0.248301	0.163	0.247	1	LINC01871	1.01509
NCBP3	0.0969126	0.138487	0.337	0.24	1	NCBP3	1.01362
NDUFS8	0.0969158	0.164049	0.62	0.567	1	NDUFS8	1.01361
ENOPH1	0.0969191	0.0813183	0.207	0.12	1	ENOPH1	1.01359
TRABD	0.0969534	-0.192938	0.478	0.533	1	TRABD	1.01344
RHOT2	0.0969844	0.0796319	0.228	0.14	1	RHOT2	1.0133
ELOB	0.09699	0.130291	0.891	0.833	1	ELOB	1.01327
GMDS	0.097006	0.0882216	0.141	0.073	1	GMDS	1.0132
EPC2	0.0970367	-0.177797	0.098	0.167	1	EPC2	1.01306
PAFAH1B2	0.0972242	-0.207274	0.196	0.273	1	PAFAH1B2	1.01223
REST	0.0973049	-0.186844	0.511	0.573	1	REST	1.01187
RPS6KB1	0.0973212	0.168281	0.207	0.127	1	RPS6KB1	1.01179
BORCS6	0.0976231	-0.15983	0.109	0.187	1	BORCS6	1.01045
CREBBP	0.097725	-0.188719	0.152	0.233	1	CREBBP	1.00999
TIGAR	0.0977589	0.0696932	0.152	0.08	1	TIGAR	1.00984
CHRNB1	0.0978783	-0.177123	0.076	0.14	1	CHRNB1	1.00931
WDR26	0.0979643	0.0566784	0.413	0.267	1	WDR26	1.00893
OCIAD2	0.0980497	0.171876	0.717	0.593	1	OCIAD2	1.00855
SMIM8	0.0981769	0.0905594	0.185	0.107	1	SMIM8	1.00799
GIMAP5	0.0981914	0.0349631	0.337	0.213	1	GIMAP5	1.00793
RFC4	0.0985709	0.052301	0.163	0.087	1	RFC4	1.00625
HLF	0.0985888	-0.122887	0.076	0.147	1	HLF	1.00617
DDX60	0.0987561	0.074881	0.207	0.12	1	DDX60	1.00544
B9D2	0.0988381	-0.121531	0.109	0.187	1	B9D2	1.00508
RALGAPA2	0.0989228	-0.196224	0.054	0.113	1	RALGAPA2	1.0047
ERCC6L2	0.099109	-0.167013	0.065	0.127	1	ERCC6L2	1.00389
PPP2R1A	0.0991926	0.152919	0.239	0.153	1	PPP2R1A	1.00352
TMEM131	0.0992673	0.0323872	0.163	0.087	1	TMEM131	1.00319
FBXO9	0.099372	0.138483	0.217	0.133	1	FBXO9	1.00274
AP5M1	0.0993732	0.083554	0.261	0.167	1	AP5M1	1.00273
RBPJ	0.09958	-0.171998	0.696	0.72	1	RBPJ	1.00183
SMC2	0.0995816	0.0891855	0.239	0.147	1	SMC2	1.00182
ANKFY1	0.0995873	-0.134244	0.087	0.16	1	ANKFY1	1.0018
AC100810.1	0.0995987	0.132325	0.174	0.1	1	AC100810.1	1.00175
FAM114A2	0.0995987	0.106192	0.174	0.1	1	FAM114A2	1.00175
DCPS	0.0996041	0.0581697	0.25	0.153	1	DCPS	1.00172
MRPL45	0.0998446	-0.148324	0.065	0.127	1	MRPL45	1.00068
PITHD1	0.100034	-0.166691	0.261	0.347	1	PITHD1	0.999853
EIF4ENIF1	0.100092	0.0760248	0.13	0.067	1	EIF4ENIF1	0.999601
ZNF226	0.100115	0.063325	0.272	0.167	1	ZNF226	0.9995
SELENOH	0.100232	-0.122866	0.598	0.667	1	SELENOH	0.998992
SYF2	0.100381	-0.126225	0.543	0.64	1	SYF2	0.998349
CSDE1	0.100394	0.204594	0.739	0.68	1	CSDE1	0.998292
ORC3	0.100644	0.078328	0.152	0.08	1	ORC3	0.997213
GUCD1	0.100644	-0.13843	0.065	0.133	1	GUCD1	0.997213
WAPL	0.100816	0.133524	0.478	0.353	1	WAPL	0.996472
MRPL58	0.100874	-0.164052	0.174	0.26	1	MRPL58	0.996223
ALKBH4	0.100877	0.0984937	0.13	0.067	1	ALKBH4	0.996206
LINC01934	0.101057	0.216032	0.5	0.407	1	LINC01934	0.995434
APOL2	0.101191	-0.170012	0.174	0.253	1	APOL2	0.99486
BCL2A1	0.101269	0.168525	0.152	0.087	1	BCL2A1	0.994521
CAPRIN1	0.101419	0.120433	0.37	0.273	1	CAPRIN1	0.993879
ZBTB2	0.101481	-0.0755014	0.054	0.12	1	ZBTB2	0.993617
GLI4	0.101993	0.16293	0.152	0.087	1	GLI4	0.991431
RNASET2	0.101995	0.133815	0.75	0.66	1	RNASET2	0.991419
GTPBP4	0.102077	0.112468	0.37	0.267	1	GTPBP4	0.991073
ERLEC1	0.102227	0.147121	0.326	0.233	1	ERLEC1	0.990435
BRAF	0.102281	-0.163591	0.13	0.207	1	BRAF	0.990204
ICAM2	0.102507	0.0912213	0.239	0.147	1	ICAM2	0.989248
IPO9	0.102513	0.0545454	0.207	0.12	1	IPO9	0.989219
HERC1	0.102593	-0.168869	0.272	0.367	1	HERC1	0.988882
VIM	0.102847	-0.199745	0.804	0.86	1	VIM	0.98781
CCDC142	0.103024	0.110014	0.141	0.073	1	CCDC142	0.987061
ITPA	0.10306	0.184053	0.326	0.24	1	ITPA	0.986909
AIP	0.103156	0.0998949	0.609	0.487	1	AIP	0.986504
LY6E	0.103197	0.141175	0.62	0.533	1	LY6E	0.986332
C18orf32	0.103263	0.0961796	0.13	0.067	1	C18orf32	0.986054
BIRC3	0.103293	0.176434	0.685	0.6	1	BIRC3	0.98593
CLTC	0.103398	0.157258	0.37	0.28	1	CLTC	0.985488
SLC25A3	0.10346	0.144629	0.848	0.793	1	SLC25A3	0.985226
MAP2K6	0.10347	-0.130907	0.076	0.147	1	MAP2K6	0.985184
TTI2	0.103479	0.0854887	0.12	0.06	1	TTI2	0.985149
PIK3R1	0.103569	-0.169636	0.424	0.487	1	PIK3R1	0.984771
RPS8	0.103569	0.0675347	1	1	1	RPS8	0.98477
TPT1	0.103569	-0.0788947	1	1	1	TPT1	0.98477
UBE2H	0.103653	0.0975581	0.391	0.273	1	UBE2H	0.984417
AC243960.1	0.103788	-0.195232	0.283	0.36	1	AC243960.1	0.983851
WRAP73	0.104067	-0.119562	0.12	0.2	1	WRAP73	0.982687
ZC3H7A	0.104115	0.112766	0.348	0.233	1	ZC3H7A	0.982488
PLAA	0.104116	0.105728	0.185	0.107	1	PLAA	0.982481
USP24	0.104173	-0.175574	0.098	0.167	1	USP24	0.982246
ZNF322	0.104183	0.0990568	0.163	0.093	1	ZNF322	0.982203
HSDL2	0.104267	0.140602	0.217	0.133	1	HSDL2	0.981854
DUSP11	0.104678	-0.169638	0.185	0.267	1	DUSP11	0.980145
DPM2	0.104685	0.0596587	0.228	0.133	1	DPM2	0.980116
SHKBP1	0.104837	0.143256	0.359	0.26	1	SHKBP1	0.979485
CCDC85B	0.105326	-0.16924	0.554	0.633	1	CCDC85B	0.977466
CAPZA2	0.10548	-0.145435	0.337	0.433	1	CAPZA2	0.976831
RAB35	0.105835	-0.160127	0.12	0.193	1	RAB35	0.97537
LTB	0.105998	0.223444	1	0.973	1	LTB	0.974702
AL450998.2	0.106022	0.0973649	0.12	0.06	1	AL450998.2	0.974602
SLAIN2	0.106143	-0.179898	0.196	0.273	1	SLAIN2	0.97411
RBM43	0.106159	0.0838961	0.185	0.107	1	RBM43	0.974045
NFE2L3	0.106159	0.0635853	0.185	0.107	1	NFE2L3	0.974045
GID8	0.106174	0.0836307	0.348	0.233	1	GID8	0.97398
BRF2	0.106209	0.133686	0.109	0.053	1	BRF2	0.973839
RPUSD2	0.106209	0.114661	0.109	0.053	1	RPUSD2	0.973839
TOMM40	0.10628	0.136702	0.326	0.227	1	TOMM40	0.973548
OSTC	0.106777	-0.161493	0.402	0.513	1	OSTC	0.971523
PANK3	0.106794	0.061414	0.196	0.113	1	PANK3	0.971452
RPL21	0.106819	-0.058609	1	1	1	RPL21	0.971353
PSMG3	0.10691	0.138112	0.239	0.16	1	PSMG3	0.970981
ZNF407	0.106926	-0.147635	0.054	0.113	1	ZNF407	0.970917
VRK3	0.107032	0.12461	0.38	0.26	1	VRK3	0.970486
MTG2	0.107112	0.101866	0.109	0.053	1	MTG2	0.970163
LITAF	0.107154	-0.181429	0.217	0.3	1	LITAF	0.969992
DPM1	0.107325	0.111633	0.293	0.193	1	DPM1	0.969298
RPS20	0.107437	0.099515	1	0.987	1	RPS20	0.968847
RPL7	0.107643	-0.0949139	0.978	0.993	1	RPL7	0.968013
EID3	0.107841	-0.0715037	0.054	0.12	1	EID3	0.967217
ZNF80	0.108021	0.146125	0.109	0.053	1	ZNF80	0.966493
TIAM2	0.108021	0.103271	0.109	0.053	1	TIAM2	0.966493
TRIM27	0.108032	-0.220561	0.217	0.287	1	TRIM27	0.966449
IP6K2	0.108266	-0.188525	0.228	0.307	1	IP6K2	0.965507
MVD	0.108383	-0.141274	0.13	0.207	1	MVD	0.965037
ZNF32	0.108417	0.110093	0.25	0.16	1	ZNF32	0.964904
SBDS	0.108454	0.0672936	0.424	0.287	1	SBDS	0.964755
DNM2	0.108508	0.0921855	0.348	0.24	1	DNM2	0.964537
RNPC3	0.108542	-0.0949343	0.076	0.147	1	RNPC3	0.964402
BRF1	0.108615	0.0618483	0.12	0.06	1	BRF1	0.964109
GALM	0.109106	0.175426	0.522	0.407	1	GALM	0.962152
BNIP3	0.109335	0.0384175	0.141	0.073	1	BNIP3	0.961239
SIPA1L1	0.109384	0.112482	0.293	0.2	1	SIPA1L1	0.961046
SDHA	0.109486	-0.19068	0.348	0.4	1	SDHA	0.960643
YTHDF2	0.109627	0.157383	0.478	0.38	1	YTHDF2	0.960084
PSMD9	0.109632	0.083451	0.185	0.107	1	PSMD9	0.960061
NAGK	0.109874	0.113734	0.38	0.267	1	NAGK	0.959107
TMEM161A	0.10993	0.0798159	0.12	0.06	1	TMEM161A	0.958883
ANXA2R	0.110192	-0.161496	0.076	0.14	1	ANXA2R	0.957848
ALG6	0.110268	-0.109654	0.054	0.113	1	ALG6	0.957552
ALOX5AP	0.110275	-0.181716	0.783	0.773	1	ALOX5AP	0.957524
SETD3	0.110338	0.0842744	0.185	0.107	1	SETD3	0.957275
TMEM216	0.110338	0.0627028	0.185	0.107	1	TMEM216	0.957275
TMEM59	0.1105	0.112797	0.75	0.647	1	TMEM59	0.956637
LINC01588	0.110691	0.0675572	0.13	0.067	1	LINC01588	0.955888
ARHGAP27	0.110775	0.119918	0.163	0.093	1	ARHGAP27	0.955558
FUCA2	0.111116	-0.120751	0.054	0.113	1	FUCA2	0.954225
PHF20L1	0.111288	0.0797921	0.413	0.3	1	PHF20L1	0.953553
GALT	0.111383	0.130051	0.152	0.087	1	GALT	0.953183
43897	0.111511	-0.214398	0.337	0.4	1	43897	0.952683
RIOK2	0.111582	0.0752799	0.196	0.113	1	RIOK2	0.952406
OGT	0.111765	-0.180773	0.413	0.507	1	OGT	0.951694
DCAF10	0.111999	0.117268	0.207	0.127	1	DCAF10	0.950786
HPRT1	0.112251	0.119778	0.304	0.207	1	HPRT1	0.94981
SRPRA	0.112398	0.128099	0.457	0.333	1	SRPRA	0.949241
GRB2	0.112712	0.138293	0.63	0.527	1	GRB2	0.948028
HLA-DRB1	0.112802	-0.338166	0.457	0.533	1	HLA-DRB1	0.947682
AC245060.5	0.112868	-0.095317	0.065	0.133	1	AC245060.5	0.947428
RPL36	0.113129	-0.0739135	1	0.993	1	RPL36	0.946425
RSBN1	0.113445	-0.160345	0.25	0.333	1	RSBN1	0.945216
SIRPG	0.113469	0.112144	0.228	0.147	1	SIRPG	0.945121
EAPP	0.113584	0.0747632	0.554	0.413	1	EAPP	0.944682
SRSF2	0.11371	0.173186	0.696	0.607	1	SRSF2	0.944203
UNC13D	0.113964	0.0939378	0.304	0.207	1	UNC13D	0.943232
PMEPA1	0.114125	0.0809165	0.13	0.067	1	PMEPA1	0.94262
BMI1	0.114131	0.0878665	0.152	0.087	1	BMI1	0.942597
KLHDC2	0.114188	-0.184766	0.228	0.307	1	KLHDC2	0.942381
TMEM186	0.114577	0.0881925	0.163	0.093	1	TMEM186	0.940903
TPI1	0.114625	0.131669	0.793	0.713	1	TPI1	0.940719
EIF3B	0.114669	0.146945	0.424	0.327	1	EIF3B	0.940555
SYNGR2	0.114726	0.0770148	0.272	0.173	1	SYNGR2	0.940339
SET	0.114747	0.100676	0.87	0.847	1	SET	0.940259
C5orf30	0.114861	0.0638184	0.12	0.06	1	C5orf30	0.939828
LPCAT4	0.114966	-0.133348	0.12	0.193	1	LPCAT4	0.939429
KIAA1143	0.115235	-0.178864	0.13	0.2	1	KIAA1143	0.938416
AURKAIP1	0.115327	-0.10011	0.598	0.64	1	AURKAIP1	0.938068
RGS1	0.115693	-0.0983849	0.228	0.32	1	RGS1	0.936694
RBM4	0.115695	0.101396	0.37	0.247	1	RBM4	0.936684
44083	0.115714	-0.180285	0.652	0.633	1	44083	0.936614
PRCP	0.115949	0.0400973	0.141	0.073	1	PRCP	0.935735
HIGD1A	0.116061	0.135636	0.348	0.24	1	HIGD1A	0.935313
CD2AP	0.116158	-0.181211	0.152	0.22	1	CD2AP	0.934951
ADNP	0.116338	0.0933118	0.348	0.24	1	ADNP	0.934278
YARS2	0.116449	-0.106901	0.109	0.187	1	YARS2	0.933864
SRSF7	0.116679	0.104036	0.826	0.8	1	SRSF7	0.933009
MZT2A	0.116704	0.143397	0.598	0.52	1	MZT2A	0.932914
ERCC6	0.116797	0.0492997	0.141	0.073	1	ERCC6	0.932569
TRMT6	0.116907	0.0775276	0.163	0.093	1	TRMT6	0.93216
CPM	0.117071	0.149679	0.272	0.187	1	CPM	0.931549
NDUFAF1	0.117311	0.114747	0.196	0.12	1	NDUFAF1	0.93066
CHST7	0.117337	0.108843	0.152	0.087	1	CHST7	0.930567
TRIM26	0.117337	0.101653	0.152	0.087	1	TRIM26	0.930567
ARIH1	0.117484	0.107262	0.261	0.173	1	ARIH1	0.930022
TNIP3	0.117622	0.093831	0.12	0.06	1	TNIP3	0.92951
FBXO25	0.117692	0.0967798	0.163	0.093	1	FBXO25	0.929254
CALM3	0.117714	0.18184	0.717	0.647	1	CALM3	0.929171
SNRPF	0.11784	0.120401	0.533	0.4	1	SNRPF	0.928708
POLR2B	0.118327	0.18449	0.511	0.413	1	POLR2B	0.926915
NUMA1	0.118516	-0.182804	0.359	0.42	1	NUMA1	0.926224
NDUFA6	0.118788	0.133341	0.533	0.42	1	NDUFA6	0.925229
PIGK	0.118792	-0.134886	0.076	0.14	1	PIGK	0.925213
YTHDC2	0.118837	-0.114982	0.207	0.287	1	YTHDC2	0.925049
NOP10	0.118844	0.151353	0.761	0.673	1	NOP10	0.925024
UPF1	0.119028	-0.128668	0.12	0.2	1	UPF1	0.924351
LINC02273	0.119034	-0.136164	0.087	0.153	1	LINC02273	0.92433
TFDP2	0.119065	-0.12966	0.12	0.193	1	TFDP2	0.924217
CYLD	0.119197	-0.149185	0.728	0.78	1	CYLD	0.923736
DUSP28	0.119274	0.119842	0.163	0.093	1	DUSP28	0.923454
TXNDC17	0.119392	0.144659	0.543	0.4	1	TXNDC17	0.923026
ZNF75D	0.11941	0.0787434	0.109	0.053	1	ZNF75D	0.922959
TFPT	0.119979	-0.143572	0.261	0.333	1	TFPT	0.920896
PRELID3B	0.120005	0.101111	0.283	0.187	1	PRELID3B	0.920801
ARL8A	0.120126	0.132965	0.196	0.127	1	ARL8A	0.920364
NEMF	0.120129	-0.212886	0.413	0.48	1	NEMF	0.920352
LCP1	0.120279	-0.173122	0.728	0.767	1	LCP1	0.919808
SPTLC2	0.120285	0.0812047	0.261	0.167	1	SPTLC2	0.91979
ZADH2	0.120351	0.0671528	0.25	0.16	1	ZADH2	0.919549
SGPP1	0.1204	0.0630006	0.109	0.053	1	SGPP1	0.919373
L3MBTL2	0.120405	0.11701	0.217	0.14	1	L3MBTL2	0.919357
ITPK1	0.120436	0.0618255	0.12	0.06	1	ITPK1	0.919244
ZNF22	0.120784	0.101534	0.457	0.313	1	ZNF22	0.917989
BLZF1	0.120873	0.0623652	0.163	0.093	1	BLZF1	0.917671
ZDHHC4	0.121187	0.0897592	0.185	0.113	1	ZDHHC4	0.916544
NBDY	0.121194	-0.169441	0.315	0.38	1	NBDY	0.91652
GPATCH1	0.121385	0.0565002	0.12	0.06	1	GPATCH1	0.915834
CCDC82	0.121418	0.0919	0.413	0.3	1	CCDC82	0.915718
CHD2	0.121433	-0.191021	0.413	0.487	1	CHD2	0.915662
RPL4	0.121537	-0.0811716	0.989	0.967	1	RPL4	0.91529
TM7SF3	0.121665	0.126046	0.196	0.12	1	TM7SF3	0.914835
CSNK1G1	0.121805	0.117375	0.174	0.107	1	CSNK1G1	0.914336
LBR	0.122292	-0.17762	0.413	0.507	1	LBR	0.912601
FBXO2	0.12234	0.0694583	0.12	0.06	1	FBXO2	0.91243
RRP9	0.12234	0.064424	0.12	0.06	1	RRP9	0.91243
IFNGR1	0.122476	0.0771045	0.207	0.127	1	IFNGR1	0.911947
RPL17	0.122646	0.155318	0.478	0.373	1	RPL17	0.911348
MALSU1	0.122674	-0.174584	0.207	0.287	1	MALSU1	0.911246
CWC27	0.122798	0.109158	0.272	0.18	1	CWC27	0.910809
NUP88	0.123134	0.0865792	0.141	0.08	1	NUP88	0.90962
ZNF655	0.123161	0.072948	0.446	0.32	1	ZNF655	0.909528
SRF	0.123409	0.068538	0.109	0.053	1	SRF	0.908654
ST6GALNAC6	0.124001	0.0181451	0.13	0.067	1	ST6GALNAC6	0.906575
SRSF6	0.124081	0.102176	0.272	0.18	1	SRSF6	0.906296
SAR1B	0.124155	0.0843205	0.413	0.307	1	SAR1B	0.906036
NCK1	0.124176	-0.127672	0.337	0.433	1	NCK1	0.905963
ELMSAN1	0.124193	0.0811651	0.261	0.167	1	ELMSAN1	0.905904
TRAF3IP3	0.124321	-0.123536	0.804	0.827	1	TRAF3IP3	0.905454
KIAA0930	0.124425	0.105424	0.109	0.053	1	KIAA0930	0.905093
STAG3	0.124425	0.0835545	0.109	0.053	1	STAG3	0.905093
SLC35B4	0.124425	0.0618707	0.109	0.053	1	SLC35B4	0.905093
SLC35E2A	0.124465	-0.0861245	0.054	0.113	1	SLC35E2A	0.904952
RBM4B	0.124495	-0.167198	0.054	0.107	1	RBM4B	0.90485
GPR68	0.124637	0.105201	0.196	0.12	1	GPR68	0.904354
CNPY4	0.124965	0.107889	0.217	0.14	1	CNPY4	0.903211
ANKRD17	0.12514	0.0583682	0.337	0.213	1	ANKRD17	0.902604
CBX5	0.125303	0.122549	0.446	0.32	1	CBX5	0.902037
TOR1AIP2	0.125374	0.0859285	0.272	0.18	1	TOR1AIP2	0.901793
GAR1	0.125452	0.127546	0.207	0.133	1	GAR1	0.901521
GNPTAB	0.125978	0.170105	0.228	0.153	1	GNPTAB	0.899704
AGMAT	0.126144	0.0878312	0.196	0.12	1	AGMAT	0.899135
NOC3L	0.126183	0.148378	0.207	0.133	1	NOC3L	0.898999
SMAD2	0.126464	-0.225971	0.261	0.333	1	SMAD2	0.898033
MTERF1	0.126517	0.104009	0.152	0.087	1	MTERF1	0.897851
ISG20	0.126625	0.164436	0.63	0.56	1	ISG20	0.89748
NKAPD1	0.126783	0.0385384	0.185	0.107	1	NKAPD1	0.896938
CDKN1B	0.126867	-0.140132	0.457	0.54	1	CDKN1B	0.89665
SYPL1	0.127005	0.0745224	0.391	0.28	1	SYPL1	0.89618
LRCH3	0.127163	0.115695	0.304	0.207	1	LRCH3	0.895638
NAXE	0.127221	0.0942379	0.315	0.22	1	NAXE	0.89544
ZNF780B	0.127511	0.0609367	0.109	0.053	1	ZNF780B	0.894451
REXO1	0.127548	-0.0925934	0.065	0.127	1	REXO1	0.894327
SMC4	0.127579	-0.0566476	0.326	0.433	1	SMC4	0.894221
UROS	0.1278	0.147412	0.348	0.253	1	UROS	0.893468
ECI1	0.127879	0.190676	0.315	0.227	1	ECI1	0.893201
CSKMT	0.127893	0.108643	0.13	0.073	1	CSKMT	0.893154
PDIA6	0.128015	0.192065	0.739	0.647	1	PDIA6	0.892739
S100A6	0.128283	-0.137603	0.859	0.913	1	S100A6	0.891831
ZDHHC16	0.128554	0.0484911	0.109	0.053	1	ZDHHC16	0.890916
TMED2	0.12861	0.141458	0.543	0.427	1	TMED2	0.890725
ARL4C	0.128779	0.121673	0.739	0.707	1	ARL4C	0.890156
CARS	0.128787	-0.165942	0.141	0.207	1	CARS	0.890129
GNPTG	0.128826	0.141552	0.13	0.073	1	GNPTG	0.889995
GSS	0.129074	-0.162768	0.13	0.2	1	GSS	0.889163
SPON1	0.12912	0.100682	0.163	0.093	1	SPON1	0.889008
TTC5	0.129528	-0.117792	0.152	0.227	1	TTC5	0.887638
SARDH	0.129586	-0.153296	0.109	0.173	1	SARDH	0.887442
U2SURP	0.129649	-0.160206	0.522	0.553	1	U2SURP	0.887231
CCDC7	0.129652	-0.138674	0.065	0.12	1	CCDC7	0.88722
ELMOD3	0.12966	0.0890633	0.217	0.14	1	ELMOD3	0.887194
COMMD3	0.129687	0.145597	0.457	0.347	1	COMMD3	0.887104
CREB3	0.129779	0.12822	0.196	0.127	1	CREB3	0.886796
FKBP5	0.129789	-0.16957	0.348	0.433	1	FKBP5	0.886762
VAMP4	0.129797	0.156316	0.272	0.187	1	VAMP4	0.886735
U2AF1L4	0.129944	-0.178977	0.207	0.28	1	U2AF1L4	0.886244
XAF1	0.129954	0.12309	0.37	0.267	1	XAF1	0.886209
COX6B1	0.130071	0.109851	0.87	0.773	1	COX6B1	0.885819
MVB12A	0.130216	0.102749	0.25	0.167	1	MVB12A	0.885335
TXNL1	0.13024	-0.139507	0.413	0.473	1	TXNL1	0.885255
MAPRE1	0.130483	0.0934854	0.424	0.313	1	MAPRE1	0.884445
ARL5A	0.130871	0.0591026	0.152	0.087	1	ARL5A	0.883158
LRRC28	0.131108	-0.0829498	0.054	0.113	1	LRRC28	0.882369
ACAT1	0.131674	0.0249426	0.217	0.133	1	ACAT1	0.880501
OGA	0.131774	-0.211253	0.337	0.393	1	OGA	0.880171
NDUFB10	0.131809	0.128295	0.717	0.627	1	NDUFB10	0.880053
HELZ2	0.132305	0.0691552	0.261	0.167	1	HELZ2	0.878423
ANAPC10	0.132424	0.0743288	0.217	0.133	1	ANAPC10	0.878032
MCL1	0.132537	0.131735	0.707	0.567	1	MCL1	0.877662
PICALM	0.132624	0.0914634	0.239	0.153	1	PICALM	0.877377
PDIK1L	0.132788	0.0465937	0.109	0.053	1	PDIK1L	0.876841
ALDOA	0.132788	0.0404092	0.109	0.053	1	ALDOA	0.876841
ELOF1	0.132825	0.086244	0.293	0.2	1	ELOF1	0.87672
ACTN4	0.13284	-0.163272	0.489	0.56	1	ACTN4	0.87667
PRR14	0.133093	0.142095	0.13	0.073	1	PRR14	0.875846
RNF19A	0.133456	0.167212	0.598	0.48	1	RNF19A	0.874662
CNIH1	0.133485	0.127349	0.457	0.34	1	CNIH1	0.874567
NUDC	0.133634	0.115207	0.576	0.46	1	NUDC	0.874084
MTIF3	0.133847	0.132109	0.467	0.373	1	MTIF3	0.87339
TP53BP1	0.133892	0.0603147	0.196	0.12	1	TP53BP1	0.873245
ZNF227	0.133932	0.0958804	0.141	0.08	1	ZNF227	0.873115
C12orf65	0.133934	0.0825895	0.348	0.227	1	C12orf65	0.873109
LRRC59	0.133982	0.089152	0.261	0.173	1	LRRC59	0.872953
PHTF1	0.134274	0.0743765	0.163	0.093	1	PHTF1	0.872009
TWISTNB	0.134408	0.0404801	0.174	0.1	1	TWISTNB	0.871576
TSPO	0.134709	0.134027	0.859	0.78	1	TSPO	0.870603
TEFM	0.13526	0.078391	0.207	0.127	1	TEFM	0.86883
SIN3B	0.135319	0.149176	0.152	0.093	1	SIN3B	0.868641
SHARPIN	0.135926	0.0914893	0.283	0.193	1	SHARPIN	0.866696
KDM4B	0.136034	0.041835	0.109	0.053	1	KDM4B	0.866352
SELL	0.136075	0.231991	0.446	0.353	1	SELL	0.866221
KDM7A	0.136111	-0.0905006	0.087	0.153	1	KDM7A	0.866106
CEP104	0.136138	0.132725	0.163	0.1	1	CEP104	0.866022
ACTG1	0.136303	0.102424	0.989	0.987	1	ACTG1	0.865494
SNU13	0.136486	-0.13306	0.641	0.66	1	SNU13	0.864912
SURF1	0.136592	0.116554	0.435	0.333	1	SURF1	0.864576
C22orf39	0.136761	-0.197955	0.141	0.207	1	C22orf39	0.864039
MORF4L1	0.136988	0.0963799	0.804	0.753	1	MORF4L1	0.863318
ULK3	0.13713	0.0360011	0.109	0.053	1	ULK3	0.862868
AGTRAP	0.13716	-0.135034	0.076	0.133	1	AGTRAP	0.862773
SNHG7	0.137186	-0.176201	0.304	0.373	1	SNHG7	0.862689
FAM3A	0.137229	0.0893096	0.174	0.107	1	FAM3A	0.862553
CARD16	0.137455	0.121512	0.435	0.32	1	CARD16	0.861839
LSM3	0.137772	0.116439	0.554	0.44	1	LSM3	0.860839
MAEA	0.137957	0.0700688	0.25	0.16	1	MAEA	0.860256
TSPAN14	0.138073	0.0949213	0.478	0.36	1	TSPAN14	0.859892
KHSRP	0.138254	0.0706345	0.293	0.193	1	KHSRP	0.859323
PIK3C3	0.138549	0.062006	0.217	0.133	1	PIK3C3	0.858395
MYL6B	0.138592	0.115782	0.446	0.347	1	MYL6B	0.858261
KLF6	0.138757	-0.140837	0.522	0.587	1	KLF6	0.857745
DDX55	0.138762	0.103207	0.163	0.1	1	DDX55	0.857729
ATP8A1	0.139049	-0.154161	0.098	0.16	1	ATP8A1	0.856834
TERF2IP	0.139308	-0.0876206	0.696	0.72	1	TERF2IP	0.856025
LINC002481	0.139391	0.130199	0.12	0.067	1	LINC002481	0.855766
TSNAX	0.139532	0.135969	0.391	0.293	1	TSNAX	0.855325
LAMTOR1	0.139594	0.122656	0.565	0.487	1	LAMTOR1	0.855132
H6PD	0.139599	0.0667168	0.141	0.08	1	H6PD	0.855118
M6PR	0.139766	0.126287	0.533	0.44	1	M6PR	0.8546
FBXO21	0.139797	0.0912558	0.174	0.107	1	FBXO21	0.854503
ICMT	0.139926	-0.143948	0.076	0.133	1	ICMT	0.854103
ELAC2	0.14001	0.0629248	0.207	0.127	1	ELAC2	0.85384
XRN1	0.140064	0.118475	0.489	0.353	1	XRN1	0.853675
LDAH	0.140446	0.125147	0.13	0.073	1	LDAH	0.85249
BEX3	0.140534	0.123564	0.163	0.1	1	BEX3	0.85222
TUBA1A	0.140614	0.148946	0.413	0.32	1	TUBA1A	0.851972
PPM1M	0.140653	0.157248	0.283	0.2	1	PPM1M	0.851852
CYB5A	0.140705	0.0601309	0.239	0.153	1	CYB5A	0.851691
MFSD5	0.1411	-0.138663	0.065	0.12	1	MFSD5	0.850472
TM9SF3	0.141105	0.114066	0.424	0.32	1	TM9SF3	0.850459
PSMA2	0.141444	0.0900206	0.478	0.367	1	PSMA2	0.849416
ADH5	0.141458	0.0983833	0.489	0.38	1	ADH5	0.849372
UBLCP1	0.141737	-0.181904	0.196	0.267	1	UBLCP1	0.848518
LDLRAD4	0.141859	0.0599654	0.348	0.24	1	LDLRAD4	0.848143
P2RX4	0.142088	-0.136263	0.065	0.12	1	P2RX4	0.847442
VPS28	0.142156	0.0880991	0.848	0.76	1	VPS28	0.847234
ANKRD49	0.1422	-0.121988	0.217	0.293	1	ANKRD49	0.847099
PEX6	0.142206	0.0661117	0.174	0.1	1	PEX6	0.847082
CD200	0.142303	0.132725	0.207	0.133	1	CD200	0.846786
AQP3	0.142403	0.0138946	0.348	0.233	1	AQP3	0.846481
MRTO4	0.142433	0.0178046	0.207	0.127	1	MRTO4	0.846389
SBF1	0.142474	-0.10228	0.109	0.18	1	SBF1	0.846265
UBAC1	0.142513	0.0977473	0.261	0.173	1	UBAC1	0.846147
FAM76A	0.142734	0.0643555	0.152	0.087	1	FAM76A	0.845473
BTBD1	0.142772	-0.137239	0.087	0.147	1	BTBD1	0.845357
FKBP4	0.142846	-0.11493	0.098	0.167	1	FKBP4	0.845132
SIN3A	0.142965	0.0687963	0.315	0.207	1	SIN3A	0.844772
STX16	0.143016	0.0509177	0.261	0.167	1	STX16	0.844614
METTL2B	0.143277	0.0940542	0.174	0.107	1	METTL2B	0.843822
UNKL	0.143478	0.0649803	0.141	0.08	1	UNKL	0.843215
UBXN1	0.143493	0.104725	0.88	0.76	1	UBXN1	0.843169
RNF113A	0.143528	0.0932829	0.283	0.193	1	RNF113A	0.843065
RACK1	0.143667	-0.0791727	0.989	0.993	1	RACK1	0.842642
PPIE	0.143713	0.0857941	0.337	0.24	1	PPIE	0.842504
HNRNPA3	0.143765	0.10597	0.924	0.84	1	HNRNPA3	0.842348
C12orf49	0.144158	0.0929329	0.174	0.107	1	C12orf49	0.841162
PHF23	0.14424	0.0690396	0.337	0.233	1	PHF23	0.840915
DIAPH1	0.144264	0.207853	0.62	0.547	1	DIAPH1	0.840841
HIPK3	0.14451	0.0386312	0.196	0.12	1	HIPK3	0.840103
PPWD1	0.144954	-0.121411	0.196	0.273	1	PPWD1	0.83877
PAPSS1	0.144965	0.0819123	0.217	0.14	1	PAPSS1	0.838736
MED13	0.145072	-0.150023	0.228	0.293	1	MED13	0.838416
EXOC5	0.14511	-0.16665	0.141	0.207	1	EXOC5	0.838302
MTAP	0.145352	0.0655939	0.196	0.12	1	MTAP	0.837578
DNAJC7	0.145494	0.0920028	0.641	0.5	1	DNAJC7	0.837154
RABGAP1L	0.145644	-0.165387	0.5	0.553	1	RABGAP1L	0.836707
ARRDC1	0.145727	0.0868294	0.315	0.213	1	ARRDC1	0.83646
DENND2D	0.145961	0.157468	0.446	0.353	1	DENND2D	0.835764
JADE2	0.14609	0.105283	0.25	0.167	1	JADE2	0.835379
ZNF644	0.146547	0.0985368	0.402	0.313	1	ZNF644	0.834022
ZBTB38	0.146634	0.0738646	0.435	0.333	1	ZBTB38	0.833767
DPP8	0.1468	-0.215093	0.185	0.247	1	DPP8	0.833275
ZFX	0.146961	0.115513	0.402	0.293	1	ZFX	0.832797
DCK	0.147228	0.0996234	0.413	0.3	1	DCK	0.832009
C2orf68	0.147239	0.0953588	0.228	0.147	1	C2orf68	0.831977
PRPF19	0.147439	0.0602373	0.141	0.08	1	PRPF19	0.831387
RNF40	0.147587	0.083948	0.13	0.073	1	RNF40	0.830951
LRRFIP2	0.147604	0.0988645	0.25	0.167	1	LRRFIP2	0.830902
PRH1	0.147689	0.10405	0.315	0.227	1	PRH1	0.830651
CBLB	0.14776	-0.095608	0.239	0.333	1	CBLB	0.830443
MCM9	0.147878	0.0964076	0.12	0.067	1	MCM9	0.830097
COX20	0.14805	0.170561	0.435	0.327	1	COX20	0.82959
SH3TC1	0.148128	-0.181381	0.065	0.12	1	SH3TC1	0.829362
DDX42	0.148416	0.133252	0.348	0.267	1	DDX42	0.828519
PRPF4	0.148443	0.0839946	0.141	0.08	1	PRPF4	0.828442
TBC1D23	0.14848	0.0552729	0.152	0.087	1	TBC1D23	0.828331
RGS19	0.148497	0.0908013	0.348	0.253	1	RGS19	0.828282
TRPV2	0.148761	0.0485616	0.196	0.12	1	TRPV2	0.827511
LEF1	0.148811	0.0807582	0.391	0.287	1	LEF1	0.827365
HGSNAT	0.148831	0.0690206	0.228	0.147	1	HGSNAT	0.827308
RNF170	0.148844	0.049667	0.207	0.133	1	RNF170	0.827269
RAB11A	0.148973	0.08263	0.446	0.32	1	RAB11A	0.826893
MGRN1	0.149051	0.051593	0.207	0.127	1	MGRN1	0.826665
VTA1	0.149186	-0.16432	0.087	0.147	1	VTA1	0.826273
THUMPD2	0.149451	0.0791807	0.141	0.08	1	THUMPD2	0.825501
WDR77	0.149503	-0.124166	0.098	0.16	1	WDR77	0.82535
TMEM18	0.149605	0.0950266	0.239	0.16	1	TMEM18	0.825055
HIRIP3	0.149741	0.0530437	0.163	0.093	1	HIRIP3	0.824659
MGME1	0.149741	0.0345253	0.163	0.093	1	MGME1	0.824659
PSMD3	0.1499	0.189417	0.293	0.22	1	PSMD3	0.824199
PFKP	0.150141	0.124038	0.293	0.207	1	PFKP	0.823501
CMC1	0.150162	0.0826529	0.38	0.273	1	CMC1	0.82344
RIF1	0.150268	0.104191	0.511	0.413	1	RIF1	0.823133
POLR2C	0.150372	0.111136	0.413	0.3	1	POLR2C	0.822832
COG1	0.150465	0.0720684	0.141	0.08	1	COG1	0.822565
IDH2	0.150653	-0.12357	0.359	0.433	1	IDH2	0.822022
PHF5A	0.150862	0.114739	0.185	0.12	1	PHF5A	0.821421
KLHDC10	0.15116	-0.0835978	0.054	0.107	1	KLHDC10	0.820563
METTL2A	0.151351	0.0747795	0.174	0.107	1	METTL2A	0.820014
NFE2L2	0.151412	0.113848	0.446	0.353	1	NFE2L2	0.81984
PIGC	0.151461	0.0728463	0.217	0.14	1	PIGC	0.819699
RNF138	0.151529	0.0979237	0.163	0.1	1	RNF138	0.819505
TXNDC9	0.15178	0.083736	0.424	0.307	1	TXNDC9	0.818785
TAX1BP3	0.151791	0.0730608	0.13	0.073	1	TAX1BP3	0.818755
44076	0.151999	0.0649683	0.565	0.413	1	44076	0.818161
AHCYL1	0.152007	0.133385	0.293	0.213	1	AHCYL1	0.818138
HNRNPLL	0.152049	-0.202071	0.304	0.353	1	HNRNPLL	0.818016
GOLGA2	0.15223	0.0663885	0.196	0.12	1	GOLGA2	0.817499
INPP5F	0.152267	0.0963591	0.12	0.067	1	INPP5F	0.817395
MED17	0.152478	0.0905264	0.185	0.113	1	MED17	0.816794
GGNBP2	0.152585	0.138622	0.522	0.44	1	GGNBP2	0.816487
R3HCC1L	0.152927	0.108192	0.185	0.113	1	R3HCC1L	0.815517
WDR45	0.153107	-0.130634	0.109	0.173	1	WDR45	0.815005
CBLL1	0.153118	-0.115371	0.098	0.16	1	CBLL1	0.814974
BZW2	0.153119	-0.137374	0.13	0.193	1	BZW2	0.81497
N4BP1	0.153301	0.0427299	0.478	0.367	1	N4BP1	0.814455
CDC16	0.15331	-0.075717	0.065	0.12	1	CDC16	0.81443
PLCG1	0.153379	0.0787953	0.12	0.067	1	PLCG1	0.814234
VEZT	0.153474	0.122082	0.196	0.127	1	VEZT	0.813966
SUSD6	0.15354	0.110547	0.348	0.24	1	SUSD6	0.813779
GLS	0.153741	0.0656809	0.446	0.327	1	GLS	0.813212
BCL10	0.153755	0.0807424	0.261	0.173	1	BCL10	0.813171
SNHG15	0.153954	0.0756374	0.217	0.14	1	SNHG15	0.81261
HYOU1	0.154118	0.107627	0.174	0.107	1	HYOU1	0.812146
RAB11FIP1	0.154131	0.172634	0.5	0.44	1	RAB11FIP1	0.81211
HIST1H1D	0.15414	-0.171062	0.435	0.513	1	HIST1H1D	0.812084
ANKH	0.15417	-0.109262	0.152	0.227	1	ANKH	0.811999
LIMA1	0.154178	0.208349	0.435	0.367	1	LIMA1	0.811979
ZNF611	0.154362	-0.0976531	0.065	0.12	1	ZNF611	0.811459
PUS1	0.154377	0.106996	0.163	0.1	1	PUS1	0.811417
DHX29	0.154484	-0.122059	0.196	0.267	1	DHX29	0.811118
CD40LG	0.154527	0.225919	0.457	0.38	1	CD40LG	0.810995
PSME1	0.154619	0.0621343	0.891	0.847	1	PSME1	0.810736
GNA13	0.154737	0.047598	0.239	0.153	1	GNA13	0.810406
ERCC4	0.155049	0.0700663	0.174	0.107	1	ERCC4	0.80953
STRN3	0.15542	-0.0906754	0.065	0.12	1	STRN3	0.808492
UBE2L3	0.155465	0.134796	0.63	0.533	1	UBE2L3	0.808366
OSGEP	0.155475	0.0902144	0.228	0.153	1	OSGEP	0.80834
ATAD1	0.155475	-0.144338	0.141	0.207	1	ATAD1	0.80834
LRRC61	0.155612	0.0812763	0.141	0.08	1	LRRC61	0.807957
SDF4	0.155943	0.0621953	0.424	0.307	1	SDF4	0.807035
SEC24C	0.155951	-0.0963127	0.065	0.12	1	SEC24C	0.807011
MCM7	0.156085	0.0598666	0.13	0.073	1	MCM7	0.80664
KLF2	0.15631	-0.364017	0.239	0.307	1	KLF2	0.806014
ENOSF1	0.156415	0.026487	0.152	0.087	1	ENOSF1	0.805722
SFT2D1	0.156743	0.125715	0.533	0.433	1	SFT2D1	0.804813
SPCS1	0.156939	0.0937494	0.87	0.767	1	SPCS1	0.804268
CTLA4	0.157097	0.123629	0.293	0.213	1	CTLA4	0.803832
PGD	0.157514	0.117194	0.109	0.06	1	PGD	0.802681
PLEKHO2	0.157514	0.0830119	0.109	0.06	1	PLEKHO2	0.802681
TENT5C	0.157878	-0.0532158	0.087	0.153	1	TENT5C	0.801677
ZNF594	0.157891	-0.0943974	0.054	0.107	1	ZNF594	0.801642
TARS	0.158209	0.0644891	0.207	0.133	1	TARS	0.800768
CFDP1	0.158979	-0.160032	0.217	0.287	1	CFDP1	0.79866
STX8	0.159117	0.134068	0.337	0.247	1	STX8	0.798283
CD3G	0.159233	-0.119495	0.946	0.92	1	CD3G	0.797966
ADAR	0.159912	0.148653	0.543	0.44	1	ADAR	0.79612
WIPF1	0.160072	-0.0831901	0.728	0.807	1	WIPF1	0.795685
DDAH2	0.160185	0.0967199	0.12	0.067	1	DDAH2	0.795379
LCP2	0.160262	0.136218	0.587	0.5	1	LCP2	0.79517
ABTB1	0.16028	-0.118531	0.261	0.333	1	ABTB1	0.795121
ABCD3	0.16047	0.0594236	0.13	0.073	1	ABCD3	0.794606
KMT2E	0.160551	-0.216483	0.598	0.613	1	KMT2E	0.794388
CEP120	0.160794	-0.122009	0.065	0.12	1	CEP120	0.793731
TMC8	0.161106	-0.109191	0.315	0.407	1	TMC8	0.792888
ABL2	0.16112	0.106145	0.109	0.06	1	ABL2	0.79285
SNRPN	0.161182	0.113496	0.598	0.5	1	SNRPN	0.792683
WDR53	0.161341	0.0941881	0.12	0.067	1	WDR53	0.792256
SLFN5	0.161419	-0.172113	0.696	0.773	1	SLFN5	0.792046
RYK	0.161459	0.133762	0.196	0.127	1	RYK	0.791937
PPP2R5A	0.161562	0.0435759	0.304	0.207	1	PPP2R5A	0.791661
CDK7	0.161581	0.0549666	0.13	0.073	1	CDK7	0.79161
HLA-C	0.161844	0.0569903	1	1	1	HLA-C	0.790905
GRK5	0.161964	0.0815756	0.141	0.08	1	GRK5	0.790582
UBTF	0.162037	0.072155	0.511	0.407	1	UBTF	0.790385
IP6K1	0.16226	0.0854033	0.293	0.2	1	IP6K1	0.789787
CUL5	0.162269	0.108654	0.326	0.24	1	CUL5	0.789766
ARF6	0.162389	-0.225966	0.565	0.58	1	ARF6	0.789444
PI4KA	0.162503	-0.0948773	0.054	0.107	1	PI4KA	0.789138
NCKAP1L	0.162989	0.107387	0.533	0.407	1	NCKAP1L	0.787841
BRK1	0.162994	0.090902	0.75	0.687	1	BRK1	0.787828
DDX6	0.163217	-0.153404	0.522	0.533	1	DDX6	0.787235
GEMIN6	0.16356	0.118953	0.185	0.12	1	GEMIN6	0.786324
GSTZ1	0.163672	0.0637567	0.12	0.067	1	GSTZ1	0.786026
NFYC	0.163821	0.0686526	0.239	0.153	1	NFYC	0.78563
CALU	0.16419	0.103549	0.196	0.127	1	CALU	0.784654
ETV6	0.164246	0.0914261	0.402	0.3	1	ETV6	0.784506
CDK5RAP3	0.164344	-0.157831	0.185	0.253	1	CDK5RAP3	0.784245
C8orf44	0.164495	0.146652	0.141	0.087	1	C8orf44	0.783848
RBM12B	0.164591	0.13743	0.293	0.213	1	RBM12B	0.783593
SGCB	0.164788	0.0933783	0.109	0.06	1	SGCB	0.783074
DDB2	0.164847	0.15031	0.337	0.247	1	DDB2	0.78292
VPS36	0.164927	-0.167255	0.293	0.367	1	VPS36	0.782708
ARMC10	0.165006	0.0991118	0.239	0.16	1	ARMC10	0.782501
HSF1	0.165006	0.0706086	0.239	0.16	1	HSF1	0.782501
USP1	0.165119	0.0732735	0.326	0.233	1	USP1	0.782203
TRIM69	0.165168	0.137029	0.37	0.267	1	TRIM69	0.782074
GAMT	0.165193	-0.0846016	0.076	0.133	1	GAMT	0.782009
RRAGC	0.165438	0.115862	0.185	0.12	1	RRAGC	0.781366
RMND5B	0.165556	0.0674763	0.217	0.14	1	RMND5B	0.781055
BTD	0.166025	0.113594	0.109	0.06	1	BTD	0.779827
SLC35E3	0.166028	0.101331	0.12	0.067	1	SLC35E3	0.779818
IFT57	0.166179	0.0873428	0.163	0.1	1	IFT57	0.779423
MIGA1	0.166198	-0.0978309	0.12	0.187	1	MIGA1	0.779373
CD37	0.166275	-0.119807	0.837	0.893	1	CD37	0.779174
MAP4K1	0.16636	-0.0658349	0.207	0.293	1	MAP4K1	0.778952
ATG13	0.166532	-0.162948	0.087	0.14	1	ATG13	0.778501
IDI1	0.166842	-0.193693	0.283	0.347	1	IDI1	0.777694
BLCAP	0.167079	0.125593	0.196	0.133	1	BLCAP	0.777078
ZNF428	0.167181	0.0602355	0.402	0.28	1	ZNF428	0.776812
ZNF480	0.167255	0.105849	0.228	0.153	1	ZNF480	0.77662
ATP5MC1	0.167326	0.122233	0.511	0.433	1	ATP5MC1	0.776436
HUWE1	0.167344	-0.165449	0.25	0.327	1	HUWE1	0.776391
HPS5	0.167701	-0.119538	0.087	0.147	1	HPS5	0.775464
MED11	0.167704	0.0817912	0.37	0.253	1	MED11	0.775457
BNIP3L	0.16797	0.0198106	0.467	0.347	1	BNIP3L	0.774769
JUN	0.168141	0.136742	0.565	0.433	1	JUN	0.774327
KEAP1	0.168244	0.135852	0.174	0.113	1	KEAP1	0.774059
WDR60	0.16841	0.0574797	0.12	0.067	1	WDR60	0.773632
C6orf106	0.168509	0.0349934	0.141	0.08	1	C6orf106	0.773376
NTPCR	0.168533	0.0593043	0.174	0.107	1	NTPCR	0.773316
MX2	0.168533	0.0502713	0.174	0.107	1	MX2	0.773316
PPP6R2	0.168669	0.0596368	0.217	0.14	1	PPP6R2	0.772964
CHMP2A	0.168815	0.11678	0.728	0.667	1	CHMP2A	0.772589
PTPN18	0.168875	-0.0860823	0.239	0.307	1	PTPN18	0.772435
BOLA3	0.169244	0.100252	0.337	0.247	1	BOLA3	0.771485
MT-CO2	0.169347	0.0472577	1	1	1	MT-CO2	0.771224
DDX51	0.169365	0.0806813	0.152	0.093	1	DDX51	0.771177
GOLT1B	0.169567	0.0684783	0.217	0.14	1	GOLT1B	0.77066
PCBP4	0.169611	0.0704048	0.12	0.067	1	PCBP4	0.770547
GAPVD1	0.169733	-0.158122	0.185	0.247	1	GAPVD1	0.770233
TFIP11	0.169755	0.0971219	0.196	0.127	1	TFIP11	0.770178
ZRANB2	0.169775	-0.16495	0.533	0.587	1	ZRANB2	0.770125
PAICS	0.169903	0.11693	0.141	0.087	1	PAICS	0.769799
RETREG1	0.16991	0.104878	0.239	0.167	1	RETREG1	0.769781
NSRP1	0.170241	0.0831481	0.359	0.26	1	NSRP1	0.768935
ATP6V1E1	0.170336	0.0951203	0.272	0.187	1	ATP6V1E1	0.768693
TAF1D	0.170591	-0.155797	0.543	0.553	1	TAF1D	0.768045
LRRC41	0.171169	-0.161714	0.109	0.167	1	LRRC41	0.766576
PDCL3	0.171254	0.111246	0.359	0.273	1	PDCL3	0.76636
DHRS7	0.171348	0.159552	0.478	0.393	1	DHRS7	0.766121
RNF125	0.171515	-0.111766	0.25	0.32	1	RNF125	0.765697
MAST4	0.171719	0.0481106	0.272	0.18	1	MAST4	0.765183
ARHGAP4	0.171859	0.0681502	0.402	0.3	1	ARHGAP4	0.764828
R3HDM4	0.171864	-0.196848	0.239	0.287	1	R3HDM4	0.764815
ZNF260	0.172031	0.0542663	0.12	0.067	1	ZNF260	0.764394
GSPT1	0.172121	0.12141	0.543	0.453	1	GSPT1	0.764166
SLC10A3	0.172312	0.0805355	0.109	0.06	1	SLC10A3	0.763683
SNHG9	0.172329	0.0643049	0.163	0.1	1	SNHG9	0.763642
CAPZA1	0.172441	-0.156745	0.587	0.633	1	CAPZA1	0.76336
ARHGEF3	0.172591	0.122034	0.359	0.267	1	ARHGEF3	0.762982
EIF4E2	0.172623	0.113876	0.348	0.26	1	EIF4E2	0.762902
SUPT4H1	0.172667	0.0704249	0.489	0.387	1	SUPT4H1	0.762789
TPGS1	0.172833	0.12338	0.38	0.293	1	TPGS1	0.762374
PNPLA6	0.172982	0.0340348	0.141	0.08	1	PNPLA6	0.761999
TRMT13	0.17322	-0.152961	0.217	0.287	1	TRMT13	0.761403
RRP1B	0.173353	0.0977835	0.337	0.247	1	RRP1B	0.76107
DHDDS	0.17337	0.0704658	0.163	0.1	1	DHDDS	0.761025
C9orf16	0.173594	0.152733	0.772	0.7	1	C9orf16	0.760466
CWC25	0.173937	-0.176669	0.207	0.267	1	CWC25	0.759609
PRKCA	0.173937	-0.235201	0.207	0.267	1	PRKCA	0.759609
KIF20B	0.173972	-0.228133	0.174	0.227	1	KIF20B	0.759521
RNF213	0.174021	0.116242	0.924	0.853	1	RNF213	0.759398
SPOCK2	0.174058	0.0975383	0.913	0.867	1	SPOCK2	0.759306
RPRD1B	0.174114	0.042787	0.141	0.08	1	RPRD1B	0.759167
43892	0.174183	0.127683	0.228	0.16	1	43892	0.758994
COMMD5	0.174209	0.06691	0.272	0.18	1	COMMD5	0.758929
CUL2	0.174627	0.117514	0.261	0.187	1	CUL2	0.757889
RPLP2	0.174692	-0.0851373	1	1	1	RPLP2	0.757728
PARP11	0.174712	0.0768048	0.152	0.093	1	PARP11	0.757678
NUDT21	0.174771	0.131463	0.337	0.253	1	NUDT21	0.757531
LINC00861	0.174817	-0.115106	0.293	0.36	1	LINC00861	0.757415
STX2	0.174877	0.0638612	0.109	0.06	1	STX2	0.757268
ACO2	0.175211	0.0407598	0.304	0.2	1	ACO2	0.756438
AIMP1	0.175251	0.055178	0.413	0.3	1	AIMP1	0.756339
ATP5F1C	0.175273	0.132271	0.663	0.533	1	ATP5F1C	0.756286
AGK	0.17542	-0.0881757	0.065	0.12	1	AGK	0.75592
IARS2	0.175532	0.029401	0.304	0.207	1	IARS2	0.755644
RPS27	0.175897	-0.0665224	1	1	1	RPS27	0.754742
ZNF622	0.175949	-0.135108	0.13	0.193	1	ZNF622	0.754613
ZFAS1	0.176033	-0.115563	0.554	0.647	1	ZFAS1	0.754405
AZI2	0.176068	-0.157407	0.163	0.22	1	AZI2	0.754318
CEP85L	0.176074	0.144247	0.38	0.293	1	CEP85L	0.754305
TMEM121	0.17617	0.0760579	0.109	0.06	1	TMEM121	0.754069
DCTPP1	0.176461	0.0694316	0.283	0.207	1	DCTPP1	0.75335
ARHGAP9	0.176487	0.0687522	0.38	0.287	1	ARHGAP9	0.753287
NSUN5	0.176503	0.154641	0.239	0.173	1	NSUN5	0.753248
RUVBL2	0.176522	0.0218939	0.163	0.1	1	RUVBL2	0.7532
IRF2BPL	0.176585	-0.0812923	0.065	0.12	1	IRF2BPL	0.753045
S1PR4	0.176715	0.221721	0.674	0.56	1	S1PR4	0.752728
LRRC75A	0.176886	0.078792	0.152	0.093	1	LRRC75A	0.752308
UNC50	0.176948	0.0841837	0.272	0.187	1	UNC50	0.752153
TMEM167B	0.177047	0.0719845	0.185	0.12	1	TMEM167B	0.751911
RASSF1	0.177097	0.0622303	0.239	0.16	1	RASSF1	0.751789
LAMP1	0.177324	0.0901631	0.457	0.36	1	LAMP1	0.751233
BATF	0.177676	0.161509	0.652	0.56	1	BATF	0.750372
LMBRD1	0.177685	0.105115	0.283	0.2	1	LMBRD1	0.750349
RPL12	0.177715	0.066351	1	0.993	1	RPL12	0.750275
PLD3	0.177747	-0.151761	0.065	0.113	1	PLD3	0.750198
QDPR	0.177756	-0.0886201	0.065	0.12	1	QDPR	0.750176
MGAT5	0.177756	-0.0970023	0.065	0.12	1	MGAT5	0.750176
RAD51C	0.178097	0.100843	0.283	0.2	1	RAD51C	0.749343
NNT	0.178114	-0.0947629	0.087	0.147	1	NNT	0.749301
DCAF15	0.178128	-0.108338	0.087	0.14	1	DCAF15	0.749267
PPP1R3D	0.178194	0.05837	0.12	0.067	1	PPP1R3D	0.749106
MED28	0.17836	-0.150956	0.391	0.447	1	MED28	0.748702
TENT4B	0.178365	0.105114	0.196	0.127	1	TENT4B	0.748689
NDUFAB1	0.178418	0.0825409	0.62	0.513	1	NDUFAB1	0.748561
HNRNPR	0.178761	0.107503	0.826	0.647	1	HNRNPR	0.747726
ARHGAP30	0.178774	0.0847326	0.685	0.547	1	ARHGAP30	0.747696
FGFR1OP2	0.179035	0.0980892	0.598	0.467	1	FGFR1OP2	0.747063
RBM15B	0.179223	0.0530963	0.207	0.133	1	RBM15B	0.746605
PARVG	0.179285	-0.213905	0.272	0.32	1	PARVG	0.746456
HM13	0.179444	-0.12716	0.326	0.4	1	HM13	0.746072
ARMC1	0.179568	0.0114144	0.304	0.207	1	ARMC1	0.745771
ZCCHC10	0.179585	-0.12837	0.163	0.227	1	ZCCHC10	0.745731
MRPS6	0.179602	0.0925176	0.804	0.667	1	MRPS6	0.745689
EPM2AIP1	0.179618	0.0972739	0.304	0.22	1	EPM2AIP1	0.74565
CCDC117	0.180152	-0.152891	0.065	0.113	1	CCDC117	0.744362
FUNDC1	0.180184	0.0696494	0.152	0.093	1	FUNDC1	0.744284
CAMTA1	0.180223	0.0768299	0.304	0.213	1	CAMTA1	0.744189
SPRTN	0.180322	0.0497748	0.196	0.127	1	SPRTN	0.74395
CCND3	0.180578	-0.12724	0.304	0.38	1	CCND3	0.743335
RXRB	0.180791	0.054531	0.163	0.1	1	RXRB	0.742822
NDUFAF4	0.180791	0.0368382	0.163	0.1	1	NDUFAF4	0.742822
CBX1	0.18098	-0.141469	0.217	0.28	1	CBX1	0.742369
ARPC4	0.181023	0.112732	0.739	0.66	1	ARPC4	0.742266
HPF1	0.181232	0.0993588	0.304	0.22	1	HPF1	0.741764
MZT1	0.181272	0.0850511	0.348	0.247	1	MZT1	0.74167
MPV17	0.181307	0.0601621	0.196	0.127	1	MPV17	0.741586
DNPH1	0.181644	0.101419	0.652	0.553	1	DNPH1	0.74078
BCAP31	0.181734	-0.152712	0.489	0.547	1	BCAP31	0.740563
PAPOLG	0.18187	0.0625294	0.163	0.1	1	PAPOLG	0.740238
UBE2G1	0.181889	0.142402	0.315	0.227	1	UBE2G1	0.740194
METTL18	0.18206	-0.130971	0.109	0.167	1	METTL18	0.739786
TGFBRAP1	0.182605	0.042085	0.12	0.067	1	TGFBRAP1	0.738487
SP140	0.182724	-0.195807	0.38	0.427	1	SP140	0.738206
PA2G4	0.18286	0.127328	0.663	0.62	1	PA2G4	0.737881
KIAA1586	0.183242	0.0516781	0.12	0.067	1	KIAA1586	0.736974
HLA-DQB1	0.183464	-0.196777	0.239	0.3	1	HLA-DQB1	0.73645
YTHDF3	0.183498	-0.0792066	0.087	0.147	1	YTHDF3	0.736368
STT3A	0.183528	0.111049	0.152	0.093	1	STT3A	0.736299
CTNNBL1	0.183561	0.121962	0.315	0.24	1	CTNNBL1	0.736219
TAF7	0.183642	-0.157613	0.522	0.567	1	TAF7	0.736029
PDE7A	0.183813	-0.135983	0.283	0.353	1	PDE7A	0.735625
PTBP1	0.183972	-0.145911	0.272	0.34	1	PTBP1	0.735248
IFT80	0.184245	-0.0909255	0.109	0.173	1	IFT80	0.734604
TMUB2	0.184296	0.0577653	0.239	0.16	1	TMUB2	0.734485
TAB2	0.184726	-0.143697	0.228	0.3	1	TAB2	0.733471
PDCL	0.185034	-0.135167	0.207	0.287	1	PDCL	0.732749
MRPS18B	0.185076	-0.141415	0.261	0.333	1	MRPS18B	0.732649
EDF1	0.185611	0.0916503	0.924	0.84	1	EDF1	0.731397
AKNA	0.185689	0.088834	0.609	0.5	1	AKNA	0.731213
PPP3R1	0.185737	-0.157151	0.13	0.187	1	PPP3R1	0.731102
SLC16A1	0.185806	0.0431464	0.12	0.067	1	SLC16A1	0.730941
MYD88	0.186145	0.0742524	0.185	0.12	1	MYD88	0.730149
LZIC	0.18635	0.0327562	0.272	0.187	1	LZIC	0.729671
NBAS	0.186573	-0.0796601	0.098	0.16	1	NBAS	0.729152
HDHD2	0.186602	-0.125184	0.098	0.153	1	HDHD2	0.729085
SACS	0.186917	0.0632787	0.152	0.093	1	SACS	0.728351
NSUN2	0.186999	0.0366466	0.207	0.133	1	NSUN2	0.72816
HPS1	0.187126	0.122206	0.239	0.18	1	HPS1	0.727865
RPP25L	0.187169	0.166517	0.239	0.173	1	RPP25L	0.727766
CCNT1	0.187177	0.0571435	0.185	0.12	1	CCNT1	0.727748
INO80D	0.187251	0.0536651	0.228	0.147	1	INO80D	0.727575
ZBTB24	0.18728	0.125466	0.283	0.207	1	ZBTB24	0.727509
NACC1	0.187338	0.0364064	0.163	0.1	1	NACC1	0.727374
XPO1	0.187536	0.103978	0.326	0.24	1	XPO1	0.726915
CHMP6	0.187633	0.0836921	0.174	0.113	1	CHMP6	0.726691
SHMT2	0.187989	0.0183322	0.207	0.133	1	SHMT2	0.725869
SENP1	0.188104	0.0777959	0.141	0.087	1	SENP1	0.725601
BIN2	0.188124	0.131715	0.478	0.413	1	BIN2	0.725555
METTL25	0.188127	0.0472066	0.109	0.06	1	METTL25	0.725549
RBM3	0.188136	0.119895	0.543	0.433	1	RBM3	0.725528
DMAP1	0.188213	0.0708046	0.185	0.12	1	DMAP1	0.725351
DGCR2	0.188395	0.0590666	0.12	0.067	1	DGCR2	0.72493
ZKSCAN1	0.188595	-0.168373	0.304	0.347	1	ZKSCAN1	0.724469
APOBEC3C	0.188621	0.108548	0.543	0.427	1	APOBEC3C	0.724409
LRRC8D	0.188762	-0.118802	0.13	0.2	1	LRRC8D	0.724085
BRIX1	0.188977	0.0390637	0.272	0.187	1	BRIX1	0.723592
RFXANK	0.189089	0.0563018	0.283	0.193	1	RFXANK	0.723335
SAP30	0.189182	-0.104632	0.087	0.14	1	SAP30	0.72312
RHOG	0.189354	0.177021	0.609	0.5	1	RHOG	0.722726
EMILIN2	0.1897	0.0288394	0.12	0.067	1	EMILIN2	0.721932
DDI2	0.189728	-0.0870848	0.13	0.2	1	DDI2	0.721868
CERS5	0.189883	0.102326	0.304	0.22	1	CERS5	0.721514
BCAP29	0.189907	-0.117301	0.152	0.22	1	BCAP29	0.721458
ARRDC3	0.190117	-0.0900829	0.087	0.147	1	ARRDC3	0.72098
IER2	0.19039	0.0813601	0.609	0.493	1	IER2	0.720356
FBXO33	0.190477	0.0986262	0.141	0.087	1	FBXO33	0.720157
CCNDBP1	0.190835	0.0699435	0.641	0.527	1	CCNDBP1	0.719341
PAXX	0.190896	0.0657461	0.554	0.427	1	PAXX	0.719202
HLA-F	0.190919	0.0921146	0.837	0.793	1	HLA-F	0.719151
ANP32A	0.190946	0.147666	0.663	0.54	1	ANP32A	0.719089
EPB41	0.191066	-0.119769	0.522	0.547	1	EPB41	0.718818
NIPSNAP2	0.191371	0.0861163	0.196	0.127	1	NIPSNAP2	0.718123
KIAA1551	0.191689	-0.106703	0.772	0.867	1	KIAA1551	0.717403
CYREN	0.191798	-0.013247	0.163	0.1	1	CYREN	0.717155
SERF2	0.192126	0.0748152	1	0.987	1	SERF2	0.716414
CSTF2T	0.192136	0.104936	0.207	0.14	1	CSTF2T	0.716392
LSM2	0.192448	0.124156	0.522	0.42	1	LSM2	0.715687
MAPK1	0.192499	0.122402	0.304	0.227	1	MAPK1	0.715571
CABIN1	0.192581	0.0826273	0.272	0.193	1	CABIN1	0.715386
MRFAP1	0.192762	0.12107	0.62	0.487	1	MRFAP1	0.714978
CNOT9	0.192807	0.0682851	0.228	0.153	1	CNOT9	0.714877
ERO1A	0.192883	-0.129176	0.261	0.34	1	ERO1A	0.714705
VMAC	0.192926	0.048138	0.163	0.1	1	VMAC	0.71461
RARRES3	0.193418	-0.0516597	0.989	0.98	1	RARRES3	0.713503
MEA1	0.193638	-0.115447	0.272	0.34	1	MEA1	0.713009
ESRRA	0.193742	-0.112684	0.087	0.14	1	ESRRA	0.712775
ZNF317	0.193809	-0.11696	0.065	0.113	1	ZNF317	0.712625
FOXJ3	0.193809	-0.131323	0.065	0.113	1	FOXJ3	0.712625
ATP6V0D1	0.193889	-0.156319	0.261	0.313	1	ATP6V0D1	0.712447
NOTCH1	0.194005	0.0516634	0.207	0.133	1	NOTCH1	0.712187
NMB	0.194033	0.487852	0.359	0.287	1	NMB	0.712125
PDIA4	0.194073	0.110711	0.239	0.173	1	PDIA4	0.712035
ZNF785	0.194077	0.0784098	0.141	0.087	1	ZNF785	0.712025
PEF1	0.194162	0.0662223	0.348	0.253	1	PEF1	0.711837
AP1S2	0.194223	0.0134743	0.326	0.22	1	AP1S2	0.711699
CCDC66	0.194226	0.08966	0.446	0.34	1	CCDC66	0.711693
UBR1	0.194518	0.0730517	0.185	0.12	1	UBR1	0.711041
TRIM28	0.194839	-0.133699	0.207	0.273	1	TRIM28	0.710324
CCL5	0.194907	-0.609474	0.239	0.293	1	CCL5	0.710172
ZNF669	0.195024	0.0400562	0.109	0.06	1	ZNF669	0.709913
VDAC1	0.195189	0.0878941	0.576	0.5	1	VDAC1	0.709545
PRKCH	0.195271	-0.182249	0.478	0.48	1	PRKCH	0.709363
HERC6	0.195289	0.0807079	0.141	0.087	1	HERC6	0.709323
HENMT1	0.195584	0.103704	0.185	0.12	1	HENMT1	0.708668
GLUD1	0.195663	-0.170628	0.185	0.24	1	GLUD1	0.708491
API5	0.195755	0.0745632	0.293	0.207	1	API5	0.708287
RILPL2	0.19608	0.0231702	0.598	0.453	1	RILPL2	0.707566
ZCCHC7	0.196272	0.084128	0.174	0.113	1	ZCCHC7	0.707141
CLUAP1	0.196362	-0.171854	0.152	0.207	1	CLUAP1	0.706943
CORO7	0.196434	-0.0982319	0.098	0.153	1	CORO7	0.706784
SLC6A6	0.196593	0.0950559	0.217	0.147	1	SLC6A6	0.706432
MRPL27	0.196607	0.106802	0.348	0.253	1	MRPL27	0.7064
NUP58	0.197066	-0.164284	0.13	0.18	1	NUP58	0.705388
PDCD7	0.197074	-0.141923	0.315	0.387	1	PDCD7	0.70537
CLTA	0.197076	0.056458	0.717	0.627	1	CLTA	0.705366
EIF4E3	0.197173	0.135129	0.207	0.147	1	EIF4E3	0.705152
MATR3.1	0.19728	0.0941169	0.13	0.08	1	MATR3.1	0.704916
RHBDF2	0.197363	0.0312018	0.152	0.093	1	RHBDF2	0.704735
EIF5A	0.197533	0.164843	0.598	0.507	1	EIF5A	0.70436
BHLHE40-AS1	0.197694	0.121859	0.283	0.207	1	BHLHE40-AS1	0.704007
ZNF688	0.198148	0.0437057	0.304	0.207	1	ZNF688	0.703011
STAG1	0.19858	-0.110354	0.196	0.26	1	STAG1	0.702064
GTF2H3	0.198635	0.0175202	0.163	0.1	1	GTF2H3	0.701944
UBXN7	0.198657	-0.128351	0.12	0.173	1	UBXN7	0.701896
SH3GLB1	0.198858	0.0643478	0.522	0.42	1	SH3GLB1	0.701456
TSSC4	0.19896	0.0791486	0.435	0.327	1	TSSC4	0.701234
TULP4	0.199192	0.139147	0.207	0.147	1	TULP4	0.700729
PREB	0.199249	0.0369306	0.109	0.06	1	PREB	0.700603
SELENOS	0.199313	0.109918	0.424	0.307	1	SELENOS	0.700463
XIST	0.199458	-0.0935055	0.87	0.867	1	XIST	0.700149
LST1	0.199586	0.111648	0.174	0.113	1	LST1	0.69987
ZNF567	0.199586	0.0656774	0.174	0.113	1	ZNF567	0.69987
ECHDC2	0.199714	-0.141919	0.12	0.173	1	ECHDC2	0.699591
GINM1	0.199762	0.0897398	0.228	0.16	1	GINM1	0.699488
NAA16	0.199827	-0.0224492	0.065	0.12	1	NAA16	0.699345
WARS	0.199866	0.142	0.163	0.107	1	WARS	0.69926
ZNF654	0.200432	0.0625848	0.185	0.12	1	ZNF654	0.698033
DNAJB9	0.200676	0.058017	0.272	0.187	1	DNAJB9	0.697505
FBXO34	0.200679	0.0515367	0.272	0.193	1	FBXO34	0.697499
EIF4H	0.200872	0.0472069	0.424	0.307	1	EIF4H	0.697081
RFT1	0.200938	0.0602347	0.152	0.093	1	RFT1	0.696939
FYB1	0.200975	-0.102268	0.989	0.98	1	FYB1	0.696858
NQO2	0.201261	0.0786382	0.207	0.14	1	NQO2	0.696241
VSIR	0.201534	0.162796	0.272	0.2	1	VSIR	0.695652
TNFSF10	0.201764	-0.187856	0.478	0.533	1	TNFSF10	0.695156
C6orf47	0.201777	-0.149716	0.13	0.187	1	C6orf47	0.695129
RANBP1	0.201825	0.163018	0.587	0.487	1	RANBP1	0.695026
DOCK10	0.201846	-0.211262	0.304	0.347	1	DOCK10	0.69498
YIPF4	0.20204	-0.173211	0.413	0.467	1	YIPF4	0.694563
ACOT9	0.202068	0.0556755	0.185	0.12	1	ACOT9	0.694502
CD4	0.202077	0.139961	0.696	0.607	1	CD4	0.694484
ST6GAL1	0.202115	0.0757759	0.293	0.213	1	ST6GAL1	0.6944
SETD1B	0.20214	-0.18895	0.087	0.133	1	SETD1B	0.694348
RAB6A	0.202445	0.139504	0.272	0.2	1	RAB6A	0.693693
ZNF562	0.202465	0.123134	0.12	0.073	1	ZNF562	0.693649
UVSSA	0.202465	0.101039	0.12	0.073	1	UVSSA	0.693649
ANXA1	0.202467	-0.307375	0.326	0.387	1	ANXA1	0.693647
MT-ATP8	0.202626	0.0235762	0.174	0.107	1	MT-ATP8	0.693305
TMEM205	0.202812	-0.134531	0.13	0.187	1	TMEM205	0.692907
PLP2	0.203032	0.0911662	0.467	0.373	1	PLP2	0.692436
APBA3	0.203104	-0.103695	0.087	0.14	1	APBA3	0.692282
EPN1	0.203195	0.0812373	0.239	0.167	1	EPN1	0.692086
GPR183	0.203651	0.145419	0.304	0.233	1	GPR183	0.691113
SLA	0.203795	0.072599	0.696	0.607	1	SLA	0.690807
LMBR1L	0.203878	-0.0840301	0.087	0.147	1	LMBR1L	0.69063
TYW1	0.203922	-0.106575	0.076	0.127	1	TYW1	0.690536
CTSA	0.204044	0.116169	0.413	0.32	1	CTSA	0.690276
TOB1	0.204218	-0.115847	0.12	0.18	1	TOB1	0.689906
PML	0.20425	0.0462219	0.261	0.18	1	PML	0.689839
RDH11	0.204422	0.098302	0.402	0.293	1	RDH11	0.689473
CAT	0.204528	-0.174672	0.217	0.273	1	CAT	0.689248
ATP6V1G1	0.204531	-0.0664357	0.859	0.84	1	ATP6V1G1	0.689241
RAB8B	0.20465	-0.190892	0.272	0.32	1	RAB8B	0.688989
TRAPPC8	0.204988	0.0292061	0.109	0.06	1	TRAPPC8	0.688273
DDOST	0.205066	-0.0795912	0.348	0.433	1	DDOST	0.688106
SEC11C	0.205115	0.229043	0.565	0.54	1	SEC11C	0.688003
HNRNPDL	0.205138	0.111122	0.685	0.607	1	HNRNPDL	0.687954
LASP1	0.205149	0.0955208	0.402	0.313	1	LASP1	0.68793
AC092683.1	0.205149	-0.106292	0.315	0.367	1	AC092683.1	0.68793
ACADSB	0.205177	-0.0997594	0.076	0.127	1	ACADSB	0.687871
HDAC8	0.205178	0.0547432	0.141	0.087	1	HDAC8	0.68787
MRPL52	0.205452	0.12568	0.478	0.38	1	MRPL52	0.687289
SLC35B3	0.205495	-0.0900329	0.087	0.14	1	SLC35B3	0.687198
MDM2	0.205768	0.0477837	0.348	0.253	1	MDM2	0.686621
CD81	0.205804	0.0954119	0.772	0.7	1	CD81	0.686547
IL6ST	0.206033	0.0345311	0.391	0.3	1	IL6ST	0.686064
SUMO4	0.206271	-0.0913987	0.163	0.227	1	SUMO4	0.685561
HADH	0.206299	0.0838164	0.13	0.08	1	HADH	0.685502
CTNNA1	0.206439	0.0601663	0.141	0.087	1	CTNNA1	0.685209
PPP2R5E	0.20659	-0.162946	0.239	0.3	1	PPP2R5E	0.684891
MRPS10	0.207153	0.0766337	0.359	0.26	1	MRPS10	0.683709
METTL16	0.20723	0.0478133	0.196	0.127	1	METTL16	0.683548
LDHA	0.20745	0.0935914	0.859	0.827	1	LDHA	0.683086
GSTO1	0.207526	0.0783333	0.598	0.487	1	GSTO1	0.682928
SEH1L	0.207612	0.0733129	0.13	0.08	1	SEH1L	0.682748
PCMTD2	0.207746	0.0228556	0.217	0.147	1	PCMTD2	0.682468
SH3YL1	0.208213	-0.104176	0.065	0.113	1	SH3YL1	0.681493
CAPN15	0.208229	0.0412255	0.152	0.093	1	CAPN15	0.681458
MRPL54	0.208457	0.0796061	0.543	0.42	1	MRPL54	0.680984
BNIP2	0.208621	0.0619707	0.38	0.273	1	BNIP2	0.680642
GNB1	0.208862	-0.189163	0.413	0.453	1	GNB1	0.680141
NLRP1	0.209018	-0.0250634	0.163	0.24	1	NLRP1	0.679817
AC008105.3	0.209283	0.0780402	0.424	0.347	1	AC008105.3	0.679267
RPS3	0.209431	-0.0622175	1	1	1	RPS3	0.678958
MTHFD2	0.209505	0.0337256	0.348	0.247	1	MTHFD2	0.678806
BLOC1S2	0.209683	0.0361271	0.37	0.26	1	BLOC1S2	0.678437
KIF22	0.20983	0.0432621	0.185	0.12	1	KIF22	0.678133
AC004585.1	0.210197	0.0834725	0.587	0.44	1	AC004585.1	0.677372
USP4	0.210224	0.0503478	0.293	0.213	1	USP4	0.677317
SGF29	0.210255	0.0720902	0.13	0.08	1	SGF29	0.677254
EVI2B	0.210341	-0.147926	0.62	0.64	1	EVI2B	0.677077
SYNCRIP	0.210757	0.0677866	0.511	0.393	1	SYNCRIP	0.676219
MAP4	0.210864	0.0766424	0.446	0.333	1	MAP4	0.675997
CBX4	0.210927	0.0821599	0.174	0.113	1	CBX4	0.675868
GPAT4	0.210927	0.0572635	0.174	0.113	1	GPAT4	0.675868
SUB1	0.211059	0.103231	0.924	0.927	1	SUB1	0.675596
COPS9	0.211174	0.075603	0.609	0.473	1	COPS9	0.675359
MANF	0.21122	-0.132525	0.315	0.38	1	MANF	0.675264
SHLD2	0.21154	0.0473384	0.141	0.087	1	SHLD2	0.674607
HSPD1	0.211771	0.102545	0.663	0.56	1	HSPD1	0.674134
ZNF302	0.211826	0.115997	0.348	0.267	1	ZNF302	0.674022
LXN	0.211946	0.0324277	0.152	0.093	1	LXN	0.673775
ASF1A	0.212029	-0.149797	0.326	0.373	1	ASF1A	0.673605
SLC39A3	0.212255	0.0864917	0.228	0.16	1	SLC39A3	0.673142
TMEM106C	0.212256	0.0596137	0.228	0.16	1	TMEM106C	0.673141
STAG2	0.212455	0.0707594	0.435	0.34	1	STAG2	0.672734
LARS	0.212471	0.103594	0.38	0.287	1	LARS	0.672701
TMEM147	0.212569	0.116362	0.38	0.307	1	TMEM147	0.672501
DERL2	0.213	-0.0959975	0.37	0.433	1	DERL2	0.67162
PDXK	0.213093	0.0869099	0.239	0.167	1	PDXK	0.671431
RNPEP	0.213196	0.0532264	0.152	0.093	1	RNPEP	0.671222
IQSEC1	0.213476	0.0587481	0.141	0.087	1	IQSEC1	0.67065
AL359220.1	0.213894	0.117477	0.239	0.173	1	AL359220.1	0.669802
LUC7L3	0.214022	-0.0613253	0.707	0.813	1	LUC7L3	0.669541
CPT1A	0.214025	0.0891454	0.152	0.1	1	CPT1A	0.669535
TRBC2	0.214309	-0.145306	0.891	0.887	1	TRBC2	0.66896
LY96	0.214363	0.158675	0.348	0.253	1	LY96	0.668851
AHCTF1	0.214534	-0.13457	0.13	0.18	1	AHCTF1	0.668505
IKZF1	0.214796	-0.110145	0.88	0.86	1	IKZF1	0.667974
RBBP7	0.214849	-0.165782	0.228	0.273	1	RBBP7	0.667866
CBFB	0.215201	0.0869758	0.272	0.193	1	CBFB	0.667155
VPS41	0.215249	0.0765254	0.217	0.153	1	VPS41	0.667059
LSM12	0.215272	0.0738896	0.348	0.26	1	LSM12	0.667013
TDG	0.215304	0.0962359	0.272	0.207	1	TDG	0.666947
PYROXD1	0.215336	0.082464	0.228	0.16	1	PYROXD1	0.666883
COMMD1	0.215342	0.0797483	0.326	0.247	1	COMMD1	0.666871
UQCC3	0.215351	0.0999233	0.261	0.187	1	UQCC3	0.666853
RAB21	0.215596	0.0856516	0.359	0.273	1	RAB21	0.66636
NOL9	0.216031	-0.0869558	0.098	0.153	1	NOL9	0.665484
CCNL1	0.216231	0.0937254	0.543	0.447	1	CCNL1	0.665083
ZNF544	0.216338	0.103059	0.163	0.107	1	ZNF544	0.664866
SART1	0.216476	0.11937	0.272	0.2	1	SART1	0.66459
USP3	0.216517	-0.119534	0.315	0.367	1	USP3	0.664507
CDC123	0.21653	0.106348	0.413	0.313	1	CDC123	0.664482
WDR55	0.216769	0.0526337	0.174	0.113	1	WDR55	0.664002
IL2RB	0.216857	0.175298	0.533	0.447	1	IL2RB	0.663826
MAD2L1	0.216976	0.03988	0.152	0.093	1	MAD2L1	0.663588
DOCK8	0.217071	-0.0762424	0.663	0.72	1	DOCK8	0.663397
TBC1D15	0.21729	-0.092963	0.272	0.36	1	TBC1D15	0.66296
NOP56	0.217399	0.116548	0.348	0.273	1	NOP56	0.662741
FNTA	0.217728	-0.120925	0.359	0.4	1	FNTA	0.662085
ACOT8	0.217758	-0.0899202	0.087	0.14	1	ACOT8	0.662026
CSNK1D	0.217762	0.0547364	0.413	0.307	1	CSNK1D	0.662019
VPS25	0.217802	0.0262966	0.261	0.18	1	VPS25	0.661937
ADD3	0.21804	0.0546617	0.478	0.36	1	ADD3	0.661465
ENSA	0.218161	-0.0965559	0.446	0.54	1	ENSA	0.661223
UBE2G2	0.218269	0.042769	0.359	0.267	1	UBE2G2	0.661007
C11orf58	0.219178	0.0842397	0.793	0.753	1	C11orf58	0.659202
ZNHIT1	0.219327	-0.0917226	0.511	0.533	1	ZNHIT1	0.658907
ZFAND1	0.21935	0.0288817	0.217	0.147	1	ZFAND1	0.658862
RPF1	0.219365	-0.122581	0.196	0.247	1	RPF1	0.658834
MIEN1	0.219935	0.119203	0.435	0.36	1	MIEN1	0.657706
CTR9	0.219946	0.0692649	0.337	0.247	1	CTR9	0.657684
TAF1B	0.220123	0.0662503	0.185	0.12	1	TAF1B	0.657334
TTC39C	0.220191	0.115838	0.489	0.38	1	TTC39C	0.657201
SNX1	0.220226	0.0395579	0.239	0.167	1	SNX1	0.657132
TFAM	0.220344	0.0313408	0.326	0.233	1	TFAM	0.656899
PIK3C2A	0.220416	-0.210285	0.12	0.167	1	PIK3C2A	0.656758
COX5A	0.220466	0.127821	0.663	0.627	1	COX5A	0.656658
ANKRD11	0.220694	0.0722682	0.772	0.693	1	ANKRD11	0.656209
CSE1L	0.221071	0.0438991	0.13	0.08	1	CSE1L	0.655469
CD28	0.221176	0.0844728	0.37	0.287	1	CD28	0.655262
MIF	0.221194	0.11013	0.543	0.48	1	MIF	0.655226
SLC25A45	0.221305	0.112759	0.272	0.2	1	SLC25A45	0.655008
TIMM10	0.221663	0.0199969	0.272	0.187	1	TIMM10	0.654306
ATP5PD	0.221791	0.0864901	0.587	0.533	1	ATP5PD	0.654056
PLIN3	0.221848	0.0472091	0.304	0.22	1	PLIN3	0.653944
GGA3	0.221915	0.073377	0.12	0.073	1	GGA3	0.653814
CXCL13	0.221943	0.479944	0.63	0.673	1	CXCL13	0.653758
RNF220	0.222091	0.030588	0.152	0.093	1	RNF220	0.653468
PSMB9	0.222188	0.0430493	0.913	0.893	1	PSMB9	0.653279
MKKS	0.22245	0.0596385	0.13	0.08	1	MKKS	0.652767
FAM214A	0.222508	-0.106748	0.152	0.213	1	FAM214A	0.652654
PTTG1IP	0.222653	0.0207369	0.272	0.187	1	PTTG1IP	0.652371
LMOD3	0.22268	-0.117753	0.076	0.12	1	LMOD3	0.652319
LCOR	0.22283	0.0284204	0.304	0.213	1	LCOR	0.652026
CHMP4A	0.222994	0.0963342	0.75	0.613	1	CHMP4A	0.651707
RPS29	0.223132	-0.0810396	1	1	1	RPS29	0.651439
ZSCAN32	0.223151	0.103586	0.109	0.067	1	ZSCAN32	0.651401
HAX1	0.223309	0.137825	0.522	0.433	1	HAX1	0.651093
SCAMP1	0.223376	-0.0937439	0.065	0.113	1	SCAMP1	0.650963
UQCRQ	0.223446	0.0885889	0.576	0.453	1	UQCRQ	0.650827
TRIP4	0.223689	0.0749931	0.163	0.107	1	TRIP4	0.650355
FAM3C	0.223794	0.105632	0.141	0.093	1	FAM3C	0.650152
PNN	0.224297	-0.130604	0.761	0.793	1	PNN	0.649177
TRRAP	0.22431	0.0650493	0.261	0.18	1	TRRAP	0.649152
GLTP	0.224737	0.153665	0.239	0.18	1	GLTP	0.648326
SMARCC1	0.224852	0.0514573	0.5	0.393	1	SMARCC1	0.648104
NSMCE3	0.224862	0.121369	0.38	0.313	1	NSMCE3	0.648084
AC118549.1	0.225448	-0.108194	0.13	0.187	1	AC118549.1	0.646954
ATG2B	0.225524	-0.122312	0.065	0.107	1	ATG2B	0.646807
DHX36	0.225637	-0.0994944	0.478	0.5	1	DHX36	0.64659
CD320	0.225708	0.081664	0.446	0.34	1	CD320	0.646453
RNF7	0.225987	-0.118328	0.652	0.633	1	RNF7	0.645916
PTEN	0.226023	0.0952971	0.457	0.367	1	PTEN	0.645847
ERO1B	0.226038	0.0446978	0.141	0.087	1	ERO1B	0.645819
RARA	0.226176	0.103427	0.109	0.067	1	RARA	0.645554
TP53I13	0.226178	-0.18465	0.217	0.26	1	TP53I13	0.64555
ANAPC16	0.226438	0.139629	0.848	0.8	1	ANAPC16	0.645051
PPP1R2	0.226514	-0.0579678	0.685	0.747	1	PPP1R2	0.644905
UBE2K	0.226616	0.12625	0.402	0.313	1	UBE2K	0.644709
AKAP7	0.226626	0.04727	0.13	0.08	1	AKAP7	0.644691
POLR2M	0.226782	-0.146964	0.076	0.12	1	POLR2M	0.644391
AGPAT3	0.226859	0.106573	0.25	0.18	1	AGPAT3	0.644245
NIPSNAP1	0.227293	0.0304939	0.152	0.093	1	NIPSNAP1	0.643415
DELE1	0.227293	-0.144541	0.087	0.133	1	DELE1	0.643415
KLHDC7B	0.22739	0.0225565	0.141	0.087	1	KLHDC7B	0.643229
RNASEH2C	0.227465	0.102841	0.598	0.527	1	RNASEH2C	0.643086
ITCH	0.22771	0.0848673	0.12	0.073	1	ITCH	0.642618
LIX1L	0.227871	0.107196	0.25	0.187	1	LIX1L	0.642311
LYRM2	0.227902	-0.0112316	0.413	0.307	1	LYRM2	0.642252
FBXO22	0.227908	0.0551635	0.326	0.24	1	FBXO22	0.642241
RAP2C	0.22803	0.045742	0.13	0.08	1	RAP2C	0.642008
CLPX	0.228299	0.0459469	0.261	0.187	1	CLPX	0.641496
SIPA1	0.228455	0.0357659	0.315	0.233	1	SIPA1	0.641199
XRCC5	0.228474	0.051169	0.804	0.727	1	XRCC5	0.641163
TNIK	0.228491	0.0442401	0.38	0.293	1	TNIK	0.641131
OSBPL9	0.228577	0.0854192	0.185	0.127	1	OSBPL9	0.640967
CNOT6L	0.228995	-0.138228	0.533	0.567	1	CNOT6L	0.640174
MPC2	0.229218	0.0837938	0.554	0.46	1	MPC2	0.639751
ATF7	0.229236	0.063616	0.152	0.1	1	ATF7	0.639716
OSTM1	0.229294	0.0218414	0.25	0.167	1	OSTM1	0.639607
POC1B	0.22944	0.0639242	0.13	0.08	1	POC1B	0.639331
STX11	0.22944	0.0511527	0.13	0.08	1	STX11	0.639331
EMD	0.229488	0.0813256	0.283	0.207	1	EMD	0.639241
DIMT1	0.229828	0.141704	0.185	0.133	1	DIMT1	0.638598
ZUP1	0.229911	-0.113582	0.065	0.107	1	ZUP1	0.638441
RCAN3	0.230435	0.0634443	0.391	0.3	1	RCAN3	0.637452
BUB3	0.230589	-0.0876444	0.565	0.647	1	BUB3	0.637162
RPL23A	0.230769	-0.04965	1	1	1	RPL23A	0.636822
ELOA	0.230774	0.0520119	0.185	0.12	1	ELOA	0.636813
JAML	0.231194	-0.251319	0.196	0.247	1	JAML	0.636023
C1GALT1	0.231301	0.0950974	0.207	0.147	1	C1GALT1	0.635822
AGFG1	0.231921	0.150683	0.348	0.28	1	AGFG1	0.634659
SLCO3A1	0.231973	-0.0908627	0.065	0.113	1	SLCO3A1	0.634563
EI24	0.23198	0.0372685	0.185	0.12	1	EI24	0.63455
TTC39B	0.232127	0.0828872	0.12	0.073	1	TTC39B	0.634275
ECPAS	0.232336	-0.139827	0.076	0.12	1	ECPAS	0.633884
RHOH	0.232336	0.116899	0.609	0.507	1	RHOH	0.633884
COG4	0.233209	-0.127124	0.196	0.247	1	COG4	0.632255
RNASEH2B	0.233245	-0.161852	0.413	0.453	1	RNASEH2B	0.632188
MINOS1	0.233378	0.047558	0.609	0.513	1	MINOS1	0.63194
TEX30	0.233612	0.0817092	0.12	0.073	1	TEX30	0.631505
KLF16	0.233612	0.072148	0.12	0.073	1	KLF16	0.631505
PAN3	0.233915	-0.141626	0.087	0.133	1	PAN3	0.630941
ZCCHC17	0.234599	0.097518	0.239	0.173	1	ZCCHC17	0.629673
ZC3H13	0.234742	0.0718916	0.489	0.387	1	ZC3H13	0.629409
ACIN1	0.234905	0.103077	0.359	0.28	1	ACIN1	0.629107
NEDD9	0.234986	0.0488488	0.293	0.207	1	NEDD9	0.628958
BCDIN3D	0.235144	0.0430518	0.13	0.08	1	BCDIN3D	0.628667
RIOK3	0.235236	0.0655181	0.272	0.2	1	RIOK3	0.628496
BISPR	0.235416	-0.0487367	0.12	0.187	1	BISPR	0.628164
CCNY	0.235671	0.0984206	0.239	0.173	1	CCNY	0.627694
QKI	0.235715	0.0596487	0.25	0.18	1	QKI	0.627613
BCL2L12	0.235853	-0.115668	0.065	0.107	1	BCL2L12	0.627358
PNPT1	0.236334	0.0627021	0.163	0.107	1	PNPT1	0.626473
SFMBT2	0.236358	-0.0550979	0.065	0.113	1	SFMBT2	0.626429
ALG8	0.236358	-0.0636978	0.065	0.113	1	ALG8	0.626429
NPTN	0.236418	0.0789757	0.207	0.147	1	NPTN	0.626319
LINS1	0.236453	0.0312778	0.293	0.213	1	LINS1	0.626255
ANKRD54	0.236604	0.0704079	0.12	0.073	1	ANKRD54	0.625979
SQSTM1	0.236637	0.049452	0.587	0.493	1	SQSTM1	0.625918
PNPLA8	0.237045	0.0378397	0.315	0.233	1	PNPLA8	0.62517
TNRC6A	0.237441	-0.131801	0.25	0.313	1	TNRC6A	0.624444
SERPINB9	0.237607	0.0751626	0.272	0.193	1	SERPINB9	0.62414
STMN3	0.237626	-0.111444	0.098	0.147	1	STMN3	0.624106
NCOA6	0.237954	-0.112326	0.087	0.133	1	NCOA6	0.623507
MPST	0.238029	0.0793532	0.304	0.227	1	MPST	0.62337
GDAP2	0.238033	0.0485623	0.13	0.08	1	GDAP2	0.623363
MT-CO3	0.238214	0.0537118	1	1	1	MT-CO3	0.623033
MTCH2	0.238215	0.0641231	0.304	0.22	1	MTCH2	0.623031
GNPDA1	0.2384	0.027592	0.25	0.173	1	GNPDA1	0.622694
ERN1	0.23848	-0.10752	0.109	0.16	1	ERN1	0.622548
ANKRD13D	0.238822	0.0997557	0.576	0.46	1	ANKRD13D	0.621926
PHACTR2	0.23913	0.0598427	0.598	0.507	1	PHACTR2	0.621366
PEX2	0.239203	-0.139339	0.217	0.273	1	PEX2	0.621233
NDUFAF3	0.239374	0.0808317	0.511	0.413	1	NDUFAF3	0.620924
BLOC1S6	0.23944	0.0785468	0.283	0.2	1	BLOC1S6	0.620803
DEF6	0.239558	0.0755375	0.489	0.4	1	DEF6	0.62059
WDR75	0.239622	0.0489097	0.12	0.073	1	WDR75	0.620473
TTC32	0.239622	0.0479784	0.12	0.073	1	TTC32	0.620473
GON7	0.239729	0.0827111	0.174	0.12	1	GON7	0.62028
MRPL41	0.240022	0.0720653	0.707	0.613	1	MRPL41	0.619749
MRPS30	0.240114	-0.140503	0.13	0.18	1	MRPS30	0.619583
NSF	0.24026	-0.150784	0.152	0.2	1	NSF	0.619319
KDM2A	0.240572	-0.129342	0.337	0.38	1	KDM2A	0.618755
PDXDC1	0.240587	-0.139155	0.152	0.207	1	PDXDC1	0.618727
PDCD5	0.240691	0.121891	0.522	0.44	1	PDCD5	0.618541
C12orf57	0.240962	-0.122863	0.793	0.833	1	C12orf57	0.618052
RAD9A	0.241052	-0.132813	0.141	0.193	1	RAD9A	0.61789
TIGD5	0.241141	0.0512586	0.12	0.073	1	TIGD5	0.617728
SLC35C2	0.241147	0.0583258	0.228	0.16	1	SLC35C2	0.617719
SSR2	0.241902	-0.119945	0.815	0.807	1	SSR2	0.61636
FOPNL	0.242183	0.0762929	0.196	0.133	1	FOPNL	0.615857
MAGT1	0.242267	0.0769619	0.228	0.16	1	MAGT1	0.615705
NAA35	0.242296	-0.0395338	0.065	0.113	1	NAA35	0.615654
USP25	0.242413	0.0463783	0.13	0.08	1	USP25	0.615444
OCEL1	0.242646	0.0535616	0.239	0.167	1	OCEL1	0.615027
GPR180	0.242667	0.0306565	0.12	0.073	1	GPR180	0.614989
DNM1L	0.242719	0.105243	0.239	0.18	1	DNM1L	0.614896
KLHL2	0.242843	-0.103698	0.098	0.147	1	KLHL2	0.614674
CTCF	0.243122	0.151957	0.467	0.4	1	CTCF	0.614176
NAP1L4	0.243192	-0.0408764	0.783	0.773	1	NAP1L4	0.614051
DHX57	0.243335	0.098812	0.109	0.067	1	DHX57	0.613795
GALNT7	0.243335	0.0785652	0.109	0.067	1	GALNT7	0.613795
GPR82	0.24336	-0.135013	0.141	0.193	1	GPR82	0.613751
SGMS1	0.243433	-0.10074	0.065	0.107	1	SGMS1	0.613621
SFSWAP	0.243484	0.101488	0.283	0.22	1	SFSWAP	0.613529
RPS6	0.243525	0.0628197	1	1	1	RPS6	0.613457
GLIPR2	0.243681	-0.135004	0.13	0.18	1	GLIPR2	0.613179
PCIF1	0.24373	0.115782	0.13	0.087	1	PCIF1	0.61309
LDHB	0.243754	0.069825	0.978	0.873	1	LDHB	0.613049
RSRC1	0.243825	-0.158247	0.272	0.313	1	RSRC1	0.612922
ZSWIM7	0.243842	0.0539008	0.152	0.1	1	ZSWIM7	0.612891
SDF2L1	0.243915	-0.18408	0.337	0.387	1	SDF2L1	0.612762
CARS2	0.243917	0.0793138	0.261	0.187	1	CARS2	0.612758
ZNF146	0.243939	-0.128739	0.141	0.193	1	ZNF146	0.612718
HCST	0.243986	0.0806131	0.739	0.64	1	HCST	0.612635
ETFRF1	0.24416	-0.119147	0.098	0.147	1	ETFRF1	0.612326
ARL6IP1	0.244501	0.108926	0.446	0.34	1	ARL6IP1	0.61172
PTP4A2	0.24463	0.0498942	0.859	0.76	1	PTP4A2	0.611491
SYNJ2BP	0.244773	0.0949154	0.174	0.12	1	SYNJ2BP	0.611237
TTN-AS1	0.244939	0.0923392	0.109	0.067	1	TTN-AS1	0.610942
TOPORS	0.244965	-0.18085	0.228	0.273	1	TOPORS	0.610896
STT3B	0.244982	-0.158248	0.359	0.427	1	STT3B	0.610866
RALGDS	0.245064	0.0893964	0.359	0.28	1	RALGDS	0.61072
UBE2Q2	0.24554	0.0723	0.185	0.127	1	UBE2Q2	0.609877
TMUB1	0.245645	0.0292122	0.207	0.14	1	TMUB1	0.609691
ZBTB7B	0.246152	0.1143	0.272	0.207	1	ZBTB7B	0.608796
ZC3H8	0.2462	0.125471	0.348	0.267	1	ZC3H8	0.608713
ASH1L	0.246274	0.0935835	0.609	0.48	1	ASH1L	0.608581
SNRPE	0.24643	0.139957	0.5	0.407	1	SNRPE	0.608306
TOX	0.246517	0.0998446	0.446	0.353	1	TOX	0.608153
TLE4	0.246551	0.0772819	0.109	0.067	1	TLE4	0.608094
CLOCK	0.246639	-0.105108	0.076	0.12	1	CLOCK	0.607938
BICD2	0.246639	-0.112407	0.076	0.12	1	BICD2	0.607938
PIGX	0.246785	0.0660135	0.185	0.127	1	PIGX	0.607681
MYSM1	0.246787	0.0640744	0.228	0.16	1	MYSM1	0.607677
EMC4	0.246834	0.0600989	0.348	0.26	1	EMC4	0.607596
CPEB4	0.24685	0.021239	0.13	0.08	1	CPEB4	0.607567
PKM	0.247022	0.163888	0.75	0.687	1	PKM	0.607264
PIP4K2B	0.247286	-0.126922	0.065	0.107	1	PIP4K2B	0.6068
GLRX2	0.247322	0.0829415	0.174	0.12	1	GLRX2	0.606737
TTC37	0.247667	0.146687	0.25	0.193	1	TTC37	0.606132
ASB2	0.247819	-0.0813307	0.391	0.447	1	ASB2	0.605866
ITGB2-AS1	0.248103	-0.101483	0.076	0.12	1	ITGB2-AS1	0.605368
AASDHPPT	0.248231	-0.132939	0.217	0.273	1	AASDHPPT	0.605143
GALK2	0.248494	-0.129604	0.13	0.18	1	GALK2	0.604684
CD226	0.24858	-0.136071	0.337	0.393	1	CD226	0.604533
C22orf46	0.248964	-0.111556	0.087	0.133	1	C22orf46	0.603863
CYB5R3	0.249287	0.0743725	0.185	0.127	1	CYB5R3	0.6033
TACO1	0.249337	0.057173	0.239	0.167	1	TACO1	0.603214
NUP54	0.249389	0.116315	0.217	0.16	1	NUP54	0.603123
CAPZB	0.24942	-0.119279	0.772	0.8	1	CAPZB	0.603069
KDM1A	0.249477	0.0438305	0.163	0.107	1	KDM1A	0.60297
IFT43	0.249619	-0.087226	0.065	0.107	1	IFT43	0.602723
ZDBF2	0.249619	-0.147038	0.065	0.107	1	ZDBF2	0.602723
LARP4	0.24963	0.0646171	0.217	0.153	1	LARP4	0.602703
RPRD2	0.249729	-0.104126	0.174	0.227	1	RPRD2	0.602531
PSENEN	0.249777	0.0791229	0.272	0.2	1	PSENEN	0.602448
KRR1	0.250224	-0.108577	0.37	0.433	1	KRR1	0.601672
GOLGA8B	0.250263	-0.158911	0.207	0.26	1	GOLGA8B	0.601603
PPP3CB	0.250913	0.159899	0.25	0.193	1	PPP3CB	0.600477
TOR1AIP1	0.251003	0.0630766	0.337	0.247	1	TOR1AIP1	0.600321
YWHAG	0.251038	-0.0901042	0.13	0.187	1	YWHAG	0.60026
IL27RA	0.251153	0.119094	0.489	0.427	1	IL27RA	0.600062
MOSPD2	0.251182	-0.0881351	0.065	0.107	1	MOSPD2	0.600011
NDUFAF8	0.251538	0.065438	0.478	0.367	1	NDUFAF8	0.599396
PTK2B	0.251641	0.0252276	0.174	0.113	1	PTK2B	0.599218
ZFYVE21	0.251771	-0.108523	0.087	0.133	1	ZFYVE21	0.598994
CHST11	0.251816	0.116337	0.261	0.2	1	CHST11	0.598916
PAXIP1-AS1	0.251967	0.0459866	0.12	0.073	1	PAXIP1-AS1	0.598657
MSI2	0.252494	-0.144338	0.424	0.507	1	MSI2	0.597749
[truncated: 3,947 more rows]

## Sheet: S3D-PD1+ PD1 vs. Bispecific
Table S3D: Differential Analysis of CD4+PD1+FOXP3- T cells PD-1 vs. Bispecific
	p_val	avg_logFC	pct.1	pct.2	p_val_adj	Gene_ID	logP
XIAP	8.77122e-05	0.302348	0.467	0.21	1	XIAP	4.05694
NDUFS7	0.000182825	0.307688	0.674	0.455	1	NDUFS7	3.73796
GNA15	0.000628109	0.288219	0.337	0.147	1	GNA15	3.20197
TNFRSF1B	0.000676213	0.250018	0.652	0.42	1	TNFRSF1B	3.16992
UTP11	0.000766379	0.259917	0.315	0.133	1	UTP11	3.11556
UNC45A	0.000787064	0.264094	0.391	0.189	1	UNC45A	3.10399
ATP5MC2	0.000884021	-0.217541	0.891	0.951	1	ATP5MC2	3.05354
EPN1	0.000978883	0.255448	0.239	0.091	1	EPN1	3.00927
TFAM	0.00122918	0.209617	0.326	0.147	1	TFAM	2.91039
FAM78A	0.00129482	0.283724	0.293	0.133	1	FAM78A	2.88779
IQCE	0.00160705	0.182752	0.163	0.042	1	IQCE	2.79397
SLC11A2	0.00164552	-0.214198	0.022	0.147	1	SLC11A2	2.7837
PDCD2	0.00182848	0.290275	0.554	0.357	1	PDCD2	2.73791
MRPL40	0.00247816	0.230903	0.315	0.147	1	MRPL40	2.60587
SLC1A4	0.00261358	-0.273011	0.065	0.21	1	SLC1A4	2.58276
C1orf43	0.00283089	0.318053	0.543	0.371	1	C1orf43	2.54808
NOL7	0.00288201	0.222687	0.739	0.552	1	NOL7	2.5403
DDX58	0.00303238	0.231969	0.228	0.091	1	DDX58	2.51822
AL031846.2	0.0031354	-0.196436	0.043	0.175	1	AL031846.2	2.50371
TOMM40	0.00327711	0.240854	0.326	0.161	1	TOMM40	2.48451
VGLL4	0.00379188	0.219221	0.228	0.098	1	VGLL4	2.42115
ATP5S	0.00392496	0.204331	0.261	0.112	1	ATP5S	2.40617
IDH3A	0.00396091	0.190214	0.239	0.098	1	IDH3A	2.4022
TMEM259	0.00407496	0.224623	0.457	0.273	1	TMEM259	2.38988
ATP13A1	0.00408456	0.226086	0.196	0.077	1	ATP13A1	2.38886
PNO1	0.00422541	0.198837	0.239	0.105	1	PNO1	2.37413
PIGF	0.0044764	-0.261631	0.109	0.252	1	PIGF	2.34907
MTHFSD	0.00449731	0.120378	0.109	0.021	1	MTHFSD	2.34705
VAMP4	0.00453462	0.317898	0.272	0.133	1	VAMP4	2.34346
ZNF766	0.00470152	0.210681	0.283	0.126	1	ZNF766	2.32776
IDI1	0.0047237	-0.284666	0.283	0.455	1	IDI1	2.32572
MFSD14C	0.00475486	0.243453	0.293	0.147	1	MFSD14C	2.32286
ASB3	0.00482235	0.105931	0.109	0.021	1	ASB3	2.31674
CLINT1	0.00519436	-0.296168	0.25	0.427	1	CLINT1	2.28447
SLC41A1	0.00529428	0.152533	0.12	0.028	1	SLC41A1	2.27619
MAFG	0.00531996	0.252999	0.304	0.154	1	MAFG	2.27409
TNIP3	0.00537061	0.202517	0.12	0.028	1	TNIP3	2.26998
ARMH1	0.00548475	0.208056	0.239	0.105	1	ARMH1	2.26084
CFDP1	0.00554985	-0.250571	0.217	0.392	1	CFDP1	2.25572
SMIM13	0.00568598	0.126743	0.12	0.028	1	SMIM13	2.24519
MPHOSPH10	0.00575988	0.173773	0.522	0.294	1	MPHOSPH10	2.23959
SUSD6	0.00587038	0.192036	0.348	0.182	1	SUSD6	2.23133
PCIF1	0.00593775	0.183095	0.13	0.035	1	PCIF1	2.22638
PRKDC	0.0059655	-0.287788	0.38	0.538	1	PRKDC	2.22435
TPRKB	0.00607515	0.217734	0.272	0.126	1	TPRKB	2.21644
BAG5	0.00612432	-0.297569	0.141	0.287	1	BAG5	2.21294
HDHD2	0.00612932	-0.216228	0.098	0.238	1	HDHD2	2.21259
PPP1R8	0.00626039	-0.25547	0.065	0.189	1	PPP1R8	2.2034
ATG4D	0.00636965	0.151018	0.141	0.042	1	ATG4D	2.19588
TAF9	0.00670006	0.276396	0.467	0.322	1	TAF9	2.17392
HLA-DMA	0.006926	-0.291305	0.152	0.308	1	HLA-DMA	2.15952
TMEM186	0.00702066	0.166035	0.163	0.056	1	TMEM186	2.15362
ZER1	0.00704204	0.128282	0.141	0.042	1	ZER1	2.1523
TMEM238	0.00741304	0.235716	0.326	0.182	1	TMEM238	2.13
CCT3	0.00752095	0.26658	0.761	0.601	1	CCT3	2.12373
LITAF	0.00915005	-0.279512	0.217	0.378	1	LITAF	2.03858
RBM43	0.00915925	0.129732	0.185	0.07	1	RBM43	2.03814
IL7R	0.00917705	-0.357548	0.543	0.664	1	IL7R	2.0373
MCOLN2	0.00944806	0.136055	0.185	0.07	1	MCOLN2	2.02466
KBTBD2	0.00947143	-0.17655	0.054	0.168	1	KBTBD2	2.02358
DNASE2	0.00997955	-0.228348	0.152	0.301	1	DNASE2	2.00089
STAU1	0.00998033	0.22559	0.489	0.336	1	STAU1	2.00085
SSU72	0.0100083	0.208354	0.707	0.566	1	SSU72	1.99964
GLIPR1	0.0104081	-0.336573	0.304	0.448	1	GLIPR1	1.98263
TRAF3IP1	0.0104628	-0.167816	0.022	0.112	1	TRAF3IP1	1.98035
MAPKAPK3	0.0105688	0.209442	0.326	0.182	1	MAPKAPK3	1.97597
NOP10	0.0105933	0.240295	0.761	0.657	1	NOP10	1.97497
TRAF5	0.0106216	0.251649	0.337	0.189	1	TRAF5	1.97381
ZC3HAV1	0.0106484	0.216519	0.533	0.371	1	ZC3HAV1	1.97271
KCTD5	0.0106509	0.197745	0.152	0.056	1	KCTD5	1.97261
DEXI	0.0108115	0.180076	0.37	0.217	1	DEXI	1.96612
INO80D	0.0110072	0.19255	0.228	0.105	1	INO80D	1.95832
RPL7	0.0111787	-0.159051	0.978	0.993	1	RPL7	1.95161
C18orf32	0.0116764	0.144811	0.13	0.042	1	C18orf32	1.93269
ARFIP1	0.011771	0.163764	0.152	0.056	1	ARFIP1	1.92919
SPPL2A	0.0117737	0.228888	0.5	0.35	1	SPPL2A	1.92909
AL121603.2	0.0117904	0.109067	0.109	0.028	1	AL121603.2	1.92847
SYNE1	0.0118163	0.264999	0.63	0.517	1	SYNE1	1.92752
LRRC75A	0.0119017	0.17597	0.152	0.056	1	LRRC75A	1.92439
ORAOV1	0.0121078	0.166873	0.13	0.042	1	ORAOV1	1.91693
DDAH2	0.0122266	0.155613	0.12	0.035	1	DDAH2	1.9127
LSG1	0.0126851	-0.164318	0.043	0.147	1	LSG1	1.89671
SDHC	0.0127918	-0.231816	0.261	0.413	1	SDHC	1.89307
OSBP	0.0128058	0.187093	0.304	0.175	1	OSBP	1.89259
CELF2	0.0129787	-0.210696	0.565	0.692	1	CELF2	1.88677
ZDHHC4	0.0130412	0.164321	0.185	0.077	1	ZDHHC4	1.88468
PRPF40A	0.0130426	-0.212015	0.511	0.643	1	PRPF40A	1.88463
IVD	0.0130471	-0.217997	0.087	0.203	1	IVD	1.88449
NPEPPS	0.0131006	-0.283491	0.239	0.378	1	NPEPPS	1.88271
CD70	0.013281	0.276601	0.152	0.056	1	CD70	1.87677
ADTRP	0.0133602	0.0857717	0.12	0.035	1	ADTRP	1.87419
RNF111	0.013488	0.135746	0.13	0.042	1	RNF111	1.87005
GIMAP5	0.0134893	0.170605	0.337	0.196	1	GIMAP5	1.87001
HACL1	0.0135037	0.206829	0.207	0.098	1	HACL1	1.86955
TMEM263	0.0135258	-0.165879	0.076	0.196	1	TMEM263	1.86884
UCHL3	0.0135279	0.152705	0.217	0.098	1	UCHL3	1.86877
SLC39A4	0.0135295	0.117253	0.12	0.035	1	SLC39A4	1.86872
TUBA1B	0.0135782	0.296436	0.598	0.483	1	TUBA1B	1.86716
UROD	0.0137012	0.13077	0.207	0.091	1	UROD	1.86324
TSG101	0.013938	0.205545	0.467	0.322	1	TSG101	1.8558
PHB	0.0140856	-0.24724	0.359	0.497	1	PHB	1.85122
RRP7A	0.0142027	0.217344	0.478	0.315	1	RRP7A	1.84763
DYNC1LI1	0.0143217	0.172734	0.293	0.161	1	DYNC1LI1	1.84401
ACTN1	0.0143288	0.159304	0.152	0.056	1	ACTN1	1.84379
RPN2	0.0143935	0.195895	0.609	0.434	1	RPN2	1.84183
USP38	0.0144947	-0.157874	0.043	0.14	1	USP38	1.83879
PRR34-AS1	0.0145652	0.150201	0.196	0.084	1	PRR34-AS1	1.83668
HYOU1	0.0147423	0.12914	0.174	0.07	1	HYOU1	1.83143
NDUFS3	0.0149387	0.203708	0.511	0.343	1	NDUFS3	1.82569
HUWE1	0.0151228	-0.217941	0.25	0.413	1	HUWE1	1.82037
TSNAX	0.0151441	0.233922	0.391	0.252	1	TSNAX	1.81976
FOXN3	0.0151798	0.243732	0.348	0.21	1	FOXN3	1.81873
KARS	0.0153883	0.208158	0.359	0.21	1	KARS	1.81281
CEP85L	0.0158105	0.287098	0.38	0.259	1	CEP85L	1.80106
DUSP6	0.0159047	0.138087	0.163	0.063	1	DUSP6	1.79847
BLZF1	0.0160686	0.119314	0.163	0.063	1	BLZF1	1.79402
FASTKD5	0.0160686	-0.178437	0.043	0.14	1	FASTKD5	1.79402
AC060780.1	0.0162681	-0.187455	0.033	0.119	1	AC060780.1	1.78866
WWP1	0.0165688	-0.184853	0.152	0.301	1	WWP1	1.78071
ATP13A3	0.0169451	0.154794	0.228	0.112	1	ATP13A3	1.77096
ZNF609	0.0173562	0.178874	0.207	0.098	1	ZNF609	1.76055
CHD3	0.0175569	-0.237704	0.359	0.503	1	CHD3	1.75555
MRPL57	0.0178805	0.162048	0.739	0.552	1	MRPL57	1.74762
EBPL	0.0183036	0.223145	0.457	0.315	1	EBPL	1.73746
FAM122A	0.0186049	-0.128996	0.054	0.161	1	FAM122A	1.73037
KHSRP	0.0186255	0.155666	0.293	0.161	1	KHSRP	1.72989
P4HTM	0.0187441	0.156725	0.217	0.105	1	P4HTM	1.72713
GGPS1	0.0190333	-0.205566	0.12	0.238	1	GGPS1	1.72049
CDKN2AIP	0.0190857	-0.251497	0.174	0.287	1	CDKN2AIP	1.71929
PTPRJ	0.0193387	0.21589	0.337	0.21	1	PTPRJ	1.71357
ARF1	0.0194414	0.221146	0.761	0.65	1	ARF1	1.71127
PEF1	0.0195172	0.147716	0.348	0.21	1	PEF1	1.70958
MIF	0.0196565	0.245586	0.543	0.427	1	MIF	1.70649
CCDC6	0.0196589	0.185029	0.25	0.133	1	CCDC6	1.70644
AC243960.1	0.0199312	-0.226257	0.283	0.427	1	AC243960.1	1.70047
HLA-DRA	0.0199698	-0.232026	0.402	0.545	1	HLA-DRA	1.69963
SMCO4	0.0204702	-0.360489	0.293	0.427	1	SMCO4	1.68888
ADNP	0.0204897	0.176715	0.348	0.203	1	ADNP	1.68846
TAB3	0.0206966	-0.142271	0.033	0.119	1	TAB3	1.6841
MCM6	0.0207276	0.170365	0.315	0.182	1	MCM6	1.68345
APOOL	0.0208179	0.203283	0.12	0.042	1	APOOL	1.68156
ERH	0.0209246	0.16596	0.804	0.776	1	ERH	1.67934
SBDS	0.0209992	0.161641	0.424	0.273	1	SBDS	1.6778
CORO2A	0.0212398	0.150658	0.109	0.035	1	CORO2A	1.67285
DENND1C	0.0212584	0.210953	0.261	0.147	1	DENND1C	1.67247
PUS3	0.0213011	-0.121058	0.043	0.14	1	PUS3	1.6716
MMP25-AS1	0.0213936	0.139536	0.207	0.098	1	MMP25-AS1	1.66972
DNAJC9	0.0220161	-0.180037	0.13	0.252	1	DNAJC9	1.65726
ZBTB49	0.0220344	0.134808	0.109	0.035	1	ZBTB49	1.6569
RPL4	0.0220573	-0.150355	0.989	0.958	1	RPL4	1.65645
CCL4	0.0220735	2.05749	0.033	0.119	1	CCL4	1.65613
METRN	0.0220735	-0.153082	0.033	0.119	1	METRN	1.65613
TAPBPL	0.0221935	-0.167111	0.065	0.168	1	TAPBPL	1.65377
LIF	0.0225783	0.138117	0.109	0.035	1	LIF	1.64631
MTERF1	0.022707	0.167814	0.152	0.063	1	MTERF1	1.64384
RAC2	0.0227409	0.173966	0.913	0.825	1	RAC2	1.64319
BCL7B	0.0229026	0.189963	0.315	0.189	1	BCL7B	1.64011
EIF3K	0.0229064	0.120202	0.924	0.874	1	EIF3K	1.64004
TRABD	0.0230869	-0.222732	0.478	0.573	1	TRABD	1.63664
TTC5	0.0231145	-0.198595	0.152	0.28	1	TTC5	1.63612
CCDC142	0.023291	0.180018	0.141	0.056	1	CCDC142	1.63281
TMEM200A	0.0235481	0.137717	0.13	0.049	1	TMEM200A	1.62804
TRPT1	0.023631	-0.160423	0.043	0.133	1	TRPT1	1.62652
AP4M1	0.0236762	-0.192013	0.033	0.112	1	AP4M1	1.62569
UBXN1	0.0239176	0.1453	0.88	0.783	1	UBXN1	1.62128
LYAR	0.0239299	0.272023	0.293	0.175	1	LYAR	1.62106
LIG3	0.0244498	0.153026	0.12	0.042	1	LIG3	1.61172
JHY	0.0244498	0.119494	0.12	0.042	1	JHY	1.61172
ALKBH4	0.0248563	0.143994	0.13	0.049	1	ALKBH4	1.60456
KIF5B	0.0248717	0.244881	0.674	0.573	1	KIF5B	1.60429
SLC38A1	0.0250029	0.203752	0.576	0.441	1	SLC38A1	1.60201
PGBD2	0.0250111	0.122059	0.12	0.042	1	PGBD2	1.60187
TNFRSF10B	0.0252959	0.145844	0.12	0.042	1	TNFRSF10B	1.59695
PPP1R3D	0.0258739	0.102012	0.12	0.042	1	PPP1R3D	1.58714
PRPS1	0.0259015	0.179847	0.315	0.189	1	PRPS1	1.58668
SDHAF1	0.0259758	0.139501	0.293	0.161	1	SDHAF1	1.58543
IMP3	0.0260699	0.224601	0.63	0.531	1	IMP3	1.58386
KIF5C	0.0260864	0.144269	0.141	0.056	1	KIF5C	1.58359
MANF	0.0262878	-0.175542	0.315	0.469	1	MANF	1.58025
GMEB1	0.0263552	-0.177834	0.109	0.224	1	GMEB1	1.57913
PRKRIP1	0.0263831	-0.235784	0.109	0.21	1	PRKRIP1	1.57867
MLKL	0.0264604	-0.198355	0.043	0.126	1	MLKL	1.5774
PRKCH	0.0266455	-0.222948	0.478	0.587	1	PRKCH	1.57438
MBOAT7	0.0268628	0.110256	0.152	0.063	1	MBOAT7	1.57085
ZNF322	0.0270038	0.11066	0.163	0.07	1	ZNF322	1.56857
ADARB1	0.0270643	0.124396	0.12	0.042	1	ADARB1	1.5676
FAM120A	0.0272583	0.161101	0.402	0.259	1	FAM120A	1.5645
TIGD5	0.0273691	0.096348	0.12	0.042	1	TIGD5	1.56274
NCSTN	0.0274041	0.114387	0.185	0.084	1	NCSTN	1.56218
IDH3G	0.0277006	0.231837	0.457	0.336	1	IDH3G	1.55751
PSMC4	0.027793	0.221271	0.5	0.378	1	PSMC4	1.55606
TUBGCP3	0.0279671	-0.113694	0.054	0.154	1	TUBGCP3	1.55335
MPPE1	0.027987	0.156241	0.228	0.119	1	MPPE1	1.55304
RFLNB	0.028091	0.189509	0.293	0.175	1	RFLNB	1.55143
TIGAR	0.0282038	0.104797	0.152	0.063	1	TIGAR	1.54969
CPD	0.0282552	0.123504	0.13	0.049	1	CPD	1.5489
TRMT6	0.0283006	0.11405	0.163	0.07	1	TRMT6	1.5482
AUP1	0.0283551	0.217861	0.402	0.273	1	AUP1	1.54737
MAP2K7	0.0284184	0.146607	0.283	0.161	1	MAP2K7	1.5464
QPRT	0.0291371	0.0859056	0.185	0.084	1	QPRT	1.53555
ATPAF2	0.0291651	0.0963734	0.13	0.049	1	ATPAF2	1.53514
GMDS	0.0291672	0.103193	0.141	0.056	1	GMDS	1.53511
PRKAG2	0.0293698	0.146805	0.239	0.126	1	PRKAG2	1.5321
MRPL58	0.029469	-0.186368	0.174	0.308	1	MRPL58	1.53063
HDAC7	0.0295112	-0.217523	0.12	0.224	1	HDAC7	1.53001
EPC1	0.0295627	0.272162	0.467	0.357	1	EPC1	1.52926
PRDM2	0.0296284	-0.196679	0.337	0.462	1	PRDM2	1.52829
FUS	0.0296558	0.195201	0.902	0.769	1	FUS	1.52789
CD6	0.0296812	0.173627	0.609	0.434	1	CD6	1.52752
KIAA0100	0.0297064	0.0853859	0.239	0.119	1	KIAA0100	1.52715
MSL1	0.0300503	-0.176238	0.109	0.224	1	MSL1	1.52215
TMEM219	0.0300531	-0.16045	0.413	0.566	1	TMEM219	1.52211
INTS3	0.0301778	0.11148	0.152	0.063	1	INTS3	1.52031
GAMT	0.0303941	-0.172423	0.076	0.175	1	GAMT	1.51721
GNAI3	0.0305736	0.205045	0.478	0.35	1	GNAI3	1.51465
MRPL47	0.0306546	-0.175485	0.293	0.427	1	MRPL47	1.5135
VPS16	0.0309461	0.0796966	0.207	0.098	1	VPS16	1.50939
WIPF1	0.0311022	-0.180151	0.728	0.79	1	WIPF1	1.50721
SPTSSA	0.0311901	0.137938	0.207	0.105	1	SPTSSA	1.50598
ZNF230	0.0312232	-0.164403	0.033	0.112	1	ZNF230	1.50552
ARL6IP5	0.0313037	0.103546	0.935	0.86	1	ARL6IP5	1.5044
AKT1	0.031592	0.204339	0.38	0.259	1	AKT1	1.50042
TRAF4	0.0316102	0.0740971	0.12	0.042	1	TRAF4	1.50017
NLRC5	0.0317757	0.133805	0.359	0.224	1	NLRC5	1.4979
ANKRD11	0.0321921	0.223364	0.772	0.699	1	ANKRD11	1.49225
PSME2	0.0321974	0.166967	0.902	0.86	1	PSME2	1.49218
POLR2B	0.0322283	0.225048	0.511	0.399	1	POLR2B	1.49176
CCDC130	0.0322387	0.180529	0.261	0.154	1	CCDC130	1.49162
GSPT2	0.032396	-0.16158	0.087	0.189	1	GSPT2	1.48951
SLC7A6	0.0324197	0.129993	0.228	0.119	1	SLC7A6	1.48919
SEC61G	0.0326042	0.193837	0.707	0.559	1	SEC61G	1.48673
MDM2	0.0330165	0.154669	0.348	0.217	1	MDM2	1.48127
HMGXB4	0.0333801	0.164712	0.304	0.182	1	HMGXB4	1.47651
ZNF143	0.0334239	0.194172	0.228	0.126	1	ZNF143	1.47594
STRIP1	0.0335015	-0.146477	0.043	0.126	1	STRIP1	1.47494
RPRD1B	0.0335369	0.0654604	0.141	0.056	1	RPRD1B	1.47448
NF2	0.0335696	-0.142472	0.087	0.189	1	NF2	1.47405
LRRFIP2	0.0338455	0.197654	0.25	0.147	1	LRRFIP2	1.4705
CAPZA2	0.0340073	-0.232901	0.337	0.462	1	CAPZA2	1.46843
NR2F6	0.0343382	0.12329	0.207	0.105	1	NR2F6	1.46422
CDR2	0.0346004	-0.173933	0.152	0.273	1	CDR2	1.46092
PPP4R2	0.0346035	0.288639	0.5	0.392	1	PPP4R2	1.46088
NDFIP2	0.0348055	0.152961	0.457	0.301	1	NDFIP2	1.45835
THEMIS2	0.0350888	0.121137	0.185	0.091	1	THEMIS2	1.45483
DUSP28	0.0354741	0.175278	0.163	0.077	1	DUSP28	1.45009
ARPC2	0.035588	0.118181	1	0.979	1	ARPC2	1.4487
HSPB1	0.0361752	-0.164492	0.217	0.343	1	HSPB1	1.44159
DCAF17	0.0361799	-0.127885	0.043	0.126	1	DCAF17	1.44153
ARL8A	0.0362331	0.172924	0.196	0.105	1	ARL8A	1.44089
PRKCQ	0.0364798	-0.157542	0.196	0.315	1	PRKCQ	1.43795
ELMO1	0.0366136	0.10726	0.413	0.259	1	ELMO1	1.43636
IRF7	0.0369402	0.153355	0.337	0.21	1	IRF7	1.4325
NPM1	0.0369775	-0.140901	0.967	0.937	1	NPM1	1.43206
OMA1	0.0371545	0.212019	0.239	0.14	1	OMA1	1.42999
SNRPA	0.0378204	0.131234	0.304	0.182	1	SNRPA	1.42227
CCDC115	0.0378643	0.166374	0.435	0.301	1	CCDC115	1.42177
CLOCK	0.0378941	-0.188804	0.076	0.168	1	CLOCK	1.42143
HIGD1A	0.0379726	0.159652	0.348	0.217	1	HIGD1A	1.42053
MRPS26	0.0379982	0.171278	0.391	0.252	1	MRPS26	1.42024
VAPB	0.0380134	0.130522	0.293	0.168	1	VAPB	1.42006
ZNF217	0.0380955	-0.181088	0.228	0.364	1	ZNF217	1.41913
COMT	0.0381451	0.174466	0.489	0.35	1	COMT	1.41856
PRRC2A	0.0382264	0.143857	0.315	0.189	1	PRRC2A	1.41764
DRAIC	0.0382756	0.249641	0.228	0.133	1	DRAIC	1.41708
PGM1	0.0384136	0.126014	0.163	0.077	1	PGM1	1.41551
ADSS	0.038447	-0.246699	0.239	0.35	1	ADSS	1.41514
MESD	0.0384744	0.225303	0.533	0.406	1	MESD	1.41483
GTF2H1	0.0388393	-0.165102	0.109	0.21	1	GTF2H1	1.41073
MTMR9	0.0388875	-0.164111	0.098	0.196	1	MTMR9	1.41019
TAZ	0.0392603	-0.173148	0.087	0.182	1	TAZ	1.40605
FKBP5	0.0395278	-0.17659	0.348	0.49	1	FKBP5	1.4031
HPS5	0.039538	-0.130159	0.087	0.189	1	HPS5	1.40299
METAP2	0.0396754	0.179633	0.478	0.35	1	METAP2	1.40148
RIF1	0.0397608	0.157337	0.511	0.378	1	RIF1	1.40055
USP24	0.0397756	-0.156334	0.098	0.196	1	USP24	1.40038
PIGM	0.0397828	0.153809	0.141	0.063	1	PIGM	1.4003
CASP1	0.0398148	0.160192	0.413	0.287	1	CASP1	1.39996
RPS27L	0.039867	0.213534	0.815	0.741	1	RPS27L	1.39939
EIF5A	0.0399169	0.213649	0.598	0.483	1	EIF5A	1.39884
UNC13D	0.039976	0.166901	0.304	0.196	1	UNC13D	1.3982
NUDT16	0.040024	-0.132437	0.054	0.14	1	NUDT16	1.39768
NMI	0.0400785	0.167872	0.457	0.322	1	NMI	1.39709
BTF3L4	0.0400898	0.18532	0.424	0.301	1	BTF3L4	1.39697
PPP2R1B	0.0401605	-0.16308	0.043	0.119	1	PPP2R1B	1.3962
CAMK2G	0.0401883	0.131956	0.207	0.105	1	CAMK2G	1.3959
HARS	0.0402298	-0.213124	0.217	0.336	1	HARS	1.39545
NR2C2AP	0.0405388	0.140737	0.141	0.063	1	NR2C2AP	1.39213
ZNF622	0.0405818	-0.151543	0.13	0.238	1	ZNF622	1.39167
STT3B	0.04082	-0.173469	0.359	0.497	1	STT3B	1.38913
RPL37A	0.0408953	0.0748088	1	0.993	1	RPL37A	1.38833
GSR	0.0411149	0.108926	0.174	0.084	1	GSR	1.386
SUZ12	0.0411284	-0.203212	0.304	0.441	1	SUZ12	1.38586
DARS	0.0412853	0.145354	0.5	0.364	1	DARS	1.3842
RBM12B	0.0414378	0.186621	0.293	0.182	1	RBM12B	1.3826
BRAP	0.0414625	-0.125802	0.065	0.154	1	BRAP	1.38234
RPGR	0.0416956	-0.122287	0.043	0.126	1	RPGR	1.37991
DENR	0.0418011	-0.195976	0.272	0.399	1	DENR	1.37881
ANTXR2	0.0418125	0.112249	0.174	0.084	1	ANTXR2	1.37869
NBDY	0.0420594	-0.182449	0.315	0.427	1	NBDY	1.37614
S100A6	0.0423757	-0.181542	0.859	0.93	1	S100A6	1.37288
AKAP10	0.0424368	0.154014	0.196	0.105	1	AKAP10	1.37226
UFM1	0.0424515	0.174829	0.402	0.273	1	UFM1	1.37211
JAZF1	0.0425305	0.130433	0.109	0.042	1	JAZF1	1.3713
COPB2	0.0425696	-0.173572	0.326	0.455	1	COPB2	1.3709
C19orf70	0.0428433	0.146447	0.587	0.448	1	C19orf70	1.36812
GNPTAB	0.0429916	0.13701	0.228	0.126	1	GNPTAB	1.36662
RPUSD2	0.0429918	0.137214	0.109	0.042	1	RPUSD2	1.36661
RPL36AL	0.0430763	-0.120143	0.989	0.979	1	RPL36AL	1.36576
TOMM22	0.0434552	0.156094	0.522	0.413	1	TOMM22	1.36196
GTF2E1	0.0434574	0.124598	0.109	0.042	1	GTF2E1	1.36194
SLC33A1	0.0435184	0.111935	0.12	0.049	1	SLC33A1	1.36133
RNF138	0.0437726	0.124182	0.163	0.077	1	RNF138	1.3588
YIPF2	0.0438324	0.137052	0.207	0.112	1	YIPF2	1.35821
ABHD17A	0.0439143	-0.166577	0.674	0.762	1	ABHD17A	1.35739
C9orf85	0.0439637	0.158335	0.12	0.049	1	C9orf85	1.35691
PCBP1	0.0440879	0.169374	0.826	0.748	1	PCBP1	1.35568
FAM168B	0.0440931	0.136806	0.141	0.063	1	FAM168B	1.35563
UNKL	0.0440931	0.129617	0.141	0.063	1	UNKL	1.35563
IAH1	0.0443504	0.200187	0.598	0.455	1	IAH1	1.3531
FBLN5	0.0445038	0.130413	0.141	0.063	1	FBLN5	1.3516
TAF6	0.0447429	0.0919488	0.152	0.07	1	TAF6	1.34928
DMAC2	0.0448542	0.0754798	0.25	0.14	1	DMAC2	1.3482
GTPBP2	0.0448658	-0.0985052	0.033	0.105	1	GTPBP2	1.34808
RBM18	0.0448902	0.111225	0.174	0.084	1	RBM18	1.34785
NAA15	0.0449204	-0.186164	0.141	0.245	1	NAA15	1.34756
ARL5A	0.0449422	0.0966141	0.152	0.07	1	ARL5A	1.34735
L3MBTL2	0.0451394	0.135019	0.217	0.119	1	L3MBTL2	1.34544
NBAS	0.0451395	-0.144673	0.098	0.196	1	NBAS	1.34544
DIMT1	0.0452361	0.186963	0.185	0.098	1	DIMT1	1.34452
AC110769.2	0.0453625	0.104646	0.109	0.042	1	AC110769.2	1.3433
SF3A3	0.0453764	0.187077	0.435	0.308	1	SF3A3	1.34317
CAMK1D	0.0455089	0.172214	0.196	0.105	1	CAMK1D	1.3419
MTMR14	0.0455235	0.197479	0.207	0.119	1	MTMR14	1.34176
DDX51	0.0455455	0.128931	0.152	0.07	1	DDX51	1.34155
RNF19B	0.045867	0.100314	0.13	0.056	1	RNF19B	1.3385
AGTRAP	0.0459951	-0.228485	0.076	0.161	1	AGTRAP	1.33729
NCBP2	0.0465307	0.196189	0.446	0.315	1	NCBP2	1.33226
HLA-DRB1	0.0465712	-0.482701	0.457	0.538	1	HLA-DRB1	1.33188
EDEM1	0.0467028	0.141237	0.38	0.252	1	EDEM1	1.33066
SAP30L	0.0467334	-0.103645	0.087	0.189	1	SAP30L	1.33037
VMAC	0.0468803	0.10813	0.163	0.077	1	VMAC	1.32901
GAR1	0.0469089	0.133163	0.207	0.112	1	GAR1	1.32874
RBSN	0.0469821	0.107086	0.13	0.056	1	RBSN	1.32807
LRRC59	0.047107	0.12305	0.261	0.154	1	LRRC59	1.32691
ATP13A2	0.0471943	-0.13503	0.043	0.119	1	ATP13A2	1.32611
CEP63	0.0472617	0.160673	0.207	0.112	1	CEP63	1.32549
SLC35B2	0.0473374	0.103667	0.109	0.042	1	SLC35B2	1.3248
DAPK3	0.0476051	0.108931	0.152	0.07	1	DAPK3	1.32235
EIF3F	0.0476174	-0.166498	0.772	0.818	1	EIF3F	1.32223
AGPAT1	0.0476855	0.0786354	0.163	0.077	1	AGPAT1	1.32161
CDCA7	0.0477355	-0.122851	0.098	0.203	1	CDCA7	1.32116
NCF1	0.0477571	0.0908888	0.293	0.175	1	NCF1	1.32096
MRPL10	0.047901	0.119332	0.239	0.133	1	MRPL10	1.31966
ZC2HC1A	0.047901	-0.104317	0.109	0.217	1	ZC2HC1A	1.31966
OAZ1	0.0480677	0.123977	0.978	0.986	1	OAZ1	1.31815
GPATCH1	0.0481472	0.0954188	0.12	0.049	1	GPATCH1	1.31743
MZT2B	0.0482855	-0.131705	0.75	0.832	1	MZT2B	1.31618
RBM15B	0.0483335	0.105353	0.207	0.112	1	RBM15B	1.31575
MRPS6	0.0484628	0.170865	0.804	0.65	1	MRPS6	1.31459
HMOX2	0.0484978	0.179598	0.543	0.413	1	HMOX2	1.31428
RNASEH2C	0.0487797	0.158359	0.598	0.497	1	RNASEH2C	1.31176
AC005261.1	0.0489921	-0.0928538	0.043	0.119	1	AC005261.1	1.30987
ATP2A3	0.0490015	0.135185	0.272	0.168	1	ATP2A3	1.30979
HBS1L	0.0491405	-0.148689	0.174	0.287	1	HBS1L	1.30856
SYNE2	0.0492952	-0.234517	0.891	0.86	1	SYNE2	1.3072
NAMPT	0.0493804	0.170049	0.228	0.133	1	NAMPT	1.30645
TRIM28	0.0494885	-0.154156	0.207	0.336	1	TRIM28	1.3055
SETD1B	0.0495162	-0.185174	0.087	0.175	1	SETD1B	1.30525
GTF2H2	0.0497233	0.12827	0.185	0.098	1	GTF2H2	1.30344
NRDE2	0.0497233	-0.162223	0.076	0.168	1	NRDE2	1.30344
VTA1	0.0499695	-0.124299	0.087	0.182	1	VTA1	1.30129
LINC00623	0.0501433	0.193153	0.38	0.252	1	LINC00623	1.29979
DLGAP4	0.0501796	-0.127948	0.054	0.133	1	DLGAP4	1.29947
OCEL1	0.050296	0.0945845	0.239	0.133	1	OCEL1	1.29847
UBE2Q2	0.0505063	0.160842	0.185	0.098	1	UBE2Q2	1.29665
RMND5B	0.0505214	0.177776	0.217	0.133	1	RMND5B	1.29653
SLC4A1AP	0.0505643	-0.166506	0.141	0.245	1	SLC4A1AP	1.29616
ZNF121	0.0506198	0.096014	0.152	0.07	1	ZNF121	1.29568
ZNF655	0.0516161	0.151413	0.446	0.322	1	ZNF655	1.28721
AASDH	0.0516279	0.115376	0.12	0.049	1	AASDH	1.28712
POC1B	0.0519189	0.112478	0.13	0.056	1	POC1B	1.28467
METTL25	0.0520467	0.0654091	0.109	0.042	1	METTL25	1.28361
DNAJB11	0.0520676	0.100144	0.239	0.133	1	DNAJB11	1.28343
PQLC3	0.0520785	0.156716	0.283	0.175	1	PQLC3	1.28334
TOGARAM1	0.0522356	0.103404	0.185	0.091	1	TOGARAM1	1.28203
RPL14	0.0523318	-0.113959	1	1	1	RPL14	1.28123
TIMMDC1	0.0526233	0.162135	0.457	0.329	1	TIMMDC1	1.27882
SART3	0.0528401	-0.206147	0.163	0.259	1	SART3	1.27704
TIMM10	0.052914	0.133443	0.272	0.161	1	TIMM10	1.27643
STAM	0.05294	-0.138917	0.12	0.217	1	STAM	1.27622
CISD1	0.0531169	-0.220842	0.152	0.245	1	CISD1	1.27477
APRT	0.0534184	-0.143722	0.761	0.916	1	APRT	1.27231
GOLGA7	0.0534352	-0.171237	0.391	0.49	1	GOLGA7	1.27217
SMAP2	0.053652	-0.198741	0.554	0.664	1	SMAP2	1.27041
SMAD1	0.053701	0.120798	0.109	0.042	1	SMAD1	1.27002
ANKRD54	0.0537098	0.0876761	0.12	0.049	1	ANKRD54	1.26995
PATL2	0.053767	0.143931	0.174	0.091	1	PATL2	1.26948
SCLT1	0.0538154	-0.143593	0.087	0.175	1	SCLT1	1.26909
ZNF75A	0.0538223	0.162014	0.326	0.21	1	ZNF75A	1.26904
B4GALT7	0.0539103	0.101419	0.13	0.056	1	B4GALT7	1.26833
PSTPIP1	0.0540418	-0.215192	0.326	0.434	1	PSTPIP1	1.26727
IFT52	0.0540875	-0.130663	0.065	0.147	1	IFT52	1.2669
CTSA	0.0540949	0.200593	0.413	0.301	1	CTSA	1.26684
RNF115	0.0545506	-0.178044	0.261	0.385	1	RNF115	1.2632
RARS2	0.0546478	0.109232	0.272	0.161	1	RARS2	1.26243
DNAJC21	0.0548301	0.227434	0.587	0.517	1	DNAJC21	1.26098
AC104532.2	0.055205	0.200081	0.163	0.084	1	AC104532.2	1.25802
PSMD12	0.0553077	0.16412	0.467	0.343	1	PSMD12	1.25721
PCNA	0.0554433	0.167176	0.359	0.252	1	PCNA	1.25615
CPTP	0.0554454	-0.142523	0.043	0.112	1	CPTP	1.25613
EIF4E3	0.0554813	0.196352	0.207	0.119	1	EIF4E3	1.25585
PPP6R2	0.0554964	0.118592	0.217	0.119	1	PPP6R2	1.25573
DGKE	0.0555174	0.139655	0.239	0.14	1	DGKE	1.25557
SNW1	0.0556416	0.102279	0.554	0.427	1	SNW1	1.2546
PUS1	0.0556574	0.166166	0.163	0.084	1	PUS1	1.25448
SGPP2	0.0558613	0.0600698	0.12	0.049	1	SGPP2	1.25289
RPE	0.0558672	0.1523	0.152	0.077	1	RPE	1.25284
YTHDF3	0.0558702	-0.158484	0.087	0.175	1	YTHDF3	1.25282
DIP2A	0.055914	0.237011	0.326	0.217	1	DIP2A	1.25248
TRIM16	0.0559651	-0.179426	0.043	0.112	1	TRIM16	1.25208
POLR3E	0.0561128	0.145419	0.163	0.084	1	POLR3E	1.25094
P2RY8	0.0562556	-0.201698	0.152	0.245	1	P2RY8	1.24983
RHBDD2	0.0563417	-0.126654	0.065	0.147	1	RHBDD2	1.24917
C8orf44	0.0565788	0.198064	0.141	0.07	1	C8orf44	1.24735
TMEM167B	0.0567144	0.105126	0.185	0.098	1	TMEM167B	1.24631
CYTH1	0.0567711	-0.206903	0.457	0.608	1	CYTH1	1.24587
C12orf65	0.0567863	0.129691	0.348	0.217	1	C12orf65	1.24576
FAM126B	0.0568293	0.159162	0.174	0.091	1	FAM126B	1.24543
ATP6V0A2	0.0568951	0.066638	0.217	0.119	1	ATP6V0A2	1.24493
SLC16A1	0.0569636	0.0634771	0.12	0.049	1	SLC16A1	1.2444
IP6K1	0.0569889	0.140034	0.293	0.189	1	IP6K1	1.24421
LENG9	0.0570167	-0.132621	0.043	0.112	1	LENG9	1.244
SAP30BP	0.0571572	-0.206044	0.163	0.266	1	SAP30BP	1.24293
ACTR2	0.0572454	-0.159831	0.707	0.776	1	ACTR2	1.24226
STMN3	0.0575115	-0.156243	0.098	0.189	1	STMN3	1.24025
UHMK1	0.058251	0.159026	0.402	0.287	1	UHMK1	1.2347
RER1	0.0586665	-0.152447	0.565	0.692	1	RER1	1.23161
CSNK2A1	0.0587006	0.17853	0.38	0.28	1	CSNK2A1	1.23136
SMURF2	0.059255	0.0783951	0.163	0.077	1	SMURF2	1.22727
SMARCD1	0.0594276	0.169921	0.304	0.203	1	SMARCD1	1.22601
SLC4A7	0.0594277	-0.224629	0.185	0.28	1	SLC4A7	1.22601
SMIM7	0.0595431	-0.184404	0.283	0.392	1	SMIM7	1.22517
TSC1	0.0596178	-0.100873	0.054	0.133	1	TSC1	1.22462
ST3GAL5	0.0598218	0.110434	0.185	0.098	1	ST3GAL5	1.22314
MED11	0.0598405	0.121128	0.37	0.238	1	MED11	1.22301
ATP8A1	0.0600288	-0.14351	0.098	0.189	1	ATP8A1	1.22164
BRD2	0.0600837	0.17762	0.511	0.392	1	BRD2	1.22124
POLR2J	0.0602614	0.158762	0.587	0.483	1	POLR2J	1.21996
MYCBP	0.0602706	-0.19212	0.043	0.112	1	MYCBP	1.21989
CBX7	0.0603119	0.15484	0.217	0.126	1	CBX7	1.2196
PLSCR1	0.0603912	0.148097	0.293	0.182	1	PLSCR1	1.21903
CEBPZOS	0.0605254	-0.226513	0.196	0.294	1	CEBPZOS	1.21806
LTBP3	0.0605566	-0.154164	0.163	0.273	1	LTBP3	1.21784
DERL1	0.0608038	0.133756	0.424	0.301	1	DERL1	1.21607
SELENOK	0.0611818	0.172907	0.696	0.601	1	SELENOK	1.21338
MRPL9	0.0615268	-0.18586	0.228	0.329	1	MRPL9	1.21094
SOCS1	0.0616511	0.182846	0.717	0.552	1	SOCS1	1.21006
MRPL3	0.0617141	0.191347	0.326	0.217	1	MRPL3	1.20962
HOTAIRM1	0.0617638	0.141467	0.152	0.077	1	HOTAIRM1	1.20927
USP3	0.0619054	-0.192592	0.315	0.42	1	USP3	1.20827
ATXN7L1	0.0619544	-0.126815	0.043	0.112	1	ATXN7L1	1.20793
HNRNPLL	0.0620315	-0.25266	0.304	0.399	1	HNRNPLL	1.20739
HERC1	0.0620416	-0.212389	0.272	0.385	1	HERC1	1.20732
STXBP3	0.0621472	-0.17234	0.25	0.35	1	STXBP3	1.20658
SREK1IP1	0.0622363	0.0977929	0.348	0.217	1	SREK1IP1	1.20596
RNF11	0.0622366	0.167694	0.141	0.07	1	RNF11	1.20595
RNPC3	0.0624341	-0.131174	0.076	0.161	1	RNPC3	1.20458
EXOC5	0.0628212	-0.225326	0.141	0.231	1	EXOC5	1.20189
HAUS1	0.0629099	0.164433	0.272	0.175	1	HAUS1	1.20128
PLEKHF2	0.0629125	-0.120246	0.076	0.161	1	PLEKHF2	1.20126
CSGALNACT2	0.0634842	0.173015	0.196	0.112	1	CSGALNACT2	1.19733
C3orf14	0.0636769	-0.131032	0.043	0.112	1	C3orf14	1.19602
MTMR4	0.0637597	-0.165644	0.13	0.231	1	MTMR4	1.19545
ZFX	0.0637972	0.135638	0.402	0.266	1	ZFX	1.1952
OXSR1	0.064183	-0.164814	0.152	0.245	1	OXSR1	1.19258
GID8	0.0644285	0.12294	0.348	0.231	1	GID8	1.19092
RSBN1	0.0651702	-0.158764	0.25	0.364	1	RSBN1	1.18595
ATG3	0.0653117	-0.176567	0.185	0.287	1	ATG3	1.18501
SRSF8	0.0653449	-0.128482	0.283	0.406	1	SRSF8	1.18479
VPS35	0.0653543	0.100776	0.478	0.329	1	VPS35	1.18473
UBXN6	0.0656065	-0.157626	0.098	0.182	1	UBXN6	1.18305
STRAP	0.0656716	0.168329	0.565	0.455	1	STRAP	1.18262
BUD13	0.066129	0.137334	0.13	0.063	1	BUD13	1.17961
ARCN1	0.0662492	-0.178026	0.217	0.315	1	ARCN1	1.17882
DDX39A	0.0666354	0.178251	0.359	0.266	1	DDX39A	1.17629
SLC17A5	0.0666356	-0.113211	0.043	0.112	1	SLC17A5	1.17629
COMMD2	0.0670859	0.119891	0.359	0.238	1	COMMD2	1.17337
ZCCHC2	0.0672289	0.153719	0.272	0.168	1	ZCCHC2	1.17244
CRK	0.0673557	-0.106449	0.076	0.161	1	CRK	1.17163
PLEKHM2	0.067475	0.159343	0.163	0.084	1	PLEKHM2	1.17086
RXRB	0.067475	0.091478	0.163	0.084	1	RXRB	1.17086
SPG11	0.067796	-0.12371	0.174	0.28	1	SPG11	1.1688
NDUFAF4	0.0680091	0.10813	0.163	0.084	1	NDUFAF4	1.16743
SH3TC1	0.0680125	-0.203539	0.065	0.14	1	SH3TC1	1.16741
JKAMP	0.068193	0.172144	0.304	0.196	1	JKAMP	1.16626
ALG8	0.0682774	-0.0812465	0.065	0.147	1	ALG8	1.16572
ACSL6	0.0682851	-0.17335	0.065	0.14	1	ACSL6	1.16567
TXNL1	0.0683606	-0.173008	0.413	0.531	1	TXNL1	1.16519
MRPL52	0.0684003	0.173605	0.478	0.364	1	MRPL52	1.16494
HELZ2	0.068422	0.101519	0.261	0.161	1	HELZ2	1.1648
DCAF8	0.0684495	0.107931	0.174	0.091	1	DCAF8	1.16463
DDX21	0.0684885	0.209272	0.402	0.315	1	DDX21	1.16438
MSI2	0.0685223	-0.182645	0.424	0.552	1	MSI2	1.16417
2020-09-09	0.0686348	-0.159815	0.652	0.699	1	2020-09-09	1.16346
DCAF15	0.0687195	-0.194074	0.087	0.161	1	DCAF15	1.16292
JPT2	0.0687237	0.118882	0.152	0.077	1	JPT2	1.16289
VASP	0.0690133	0.15292	0.511	0.399	1	VASP	1.16107
RPL23	0.0691188	0.146251	0.967	0.937	1	RPL23	1.1604
LMBRD2	0.069162	0.142881	0.12	0.056	1	LMBRD2	1.16013
EBI3	0.0695183	0.101705	0.141	0.07	1	EBI3	1.1579
RRP1	0.0696323	0.106458	0.163	0.084	1	RRP1	1.15719
RINL	0.0697123	-0.144405	0.141	0.238	1	RINL	1.15669
KHNYN	0.0697224	0.153001	0.13	0.063	1	KHNYN	1.15663
CALCOCO1	0.0697503	0.10193	0.272	0.168	1	CALCOCO1	1.15645
SCCPDH	0.0698496	0.116606	0.152	0.077	1	SCCPDH	1.15584
WBP11	0.0698956	-0.13129	0.326	0.434	1	WBP11	1.15555
CBL	0.0699589	0.168558	0.293	0.196	1	CBL	1.15516
F2R	0.0700257	0.1588	0.283	0.182	1	F2R	1.15474
MMADHC	0.0703771	0.108919	0.446	0.336	1	MMADHC	1.15257
RUNX1	0.070386	0.177103	0.283	0.189	1	RUNX1	1.15251
CROT	0.0708322	-0.124926	0.076	0.154	1	CROT	1.14977
CEP95	0.0708322	-0.175753	0.076	0.154	1	CEP95	1.14977
PRPF6	0.070888	-0.127557	0.283	0.406	1	PRPF6	1.14943
PRAF2	0.0709552	0.127233	0.13	0.063	1	PRAF2	1.14902
TUBGCP6	0.0709552	0.105346	0.13	0.063	1	TUBGCP6	1.14902
AL450998.2	0.0710928	0.135421	0.12	0.056	1	AL450998.2	1.14817
KIF20B	0.071123	-0.275477	0.174	0.266	1	KIF20B	1.14799
BNIP3	0.0712945	0.108724	0.141	0.07	1	BNIP3	1.14694
NLRP1	0.071435	-0.169978	0.163	0.266	1	NLRP1	1.14609
NUBP2	0.0716216	-0.176631	0.239	0.35	1	NUBP2	1.14496
C19orf53	0.0717297	0.132347	0.837	0.797	1	C19orf53	1.1443
LAP3	0.0717722	0.147549	0.359	0.252	1	LAP3	1.14404
NAALADL1	0.0718948	0.110163	0.141	0.07	1	NAALADL1	1.1433
TBP	0.0722059	0.110797	0.13	0.063	1	TBP	1.14143
ZNHIT1	0.0724103	-0.143942	0.511	0.622	1	ZNHIT1	1.1402
RCOR1	0.0724877	0.164434	0.152	0.084	1	RCOR1	1.13974
GRK5	0.0724992	0.111734	0.141	0.07	1	GRK5	1.13967
TEX261	0.0724992	0.0892741	0.141	0.07	1	TEX261	1.13967
PRPF31	0.0725146	0.112171	0.435	0.308	1	PRPF31	1.13957
SPSB1	0.0727304	0.118535	0.152	0.077	1	SPSB1	1.13828
FTX	0.0727434	0.158557	0.543	0.441	1	FTX	1.13821
RARA	0.0730453	0.13409	0.109	0.049	1	RARA	1.13641
C5orf30	0.0730677	0.115811	0.12	0.056	1	C5orf30	1.13627
ACAD9	0.0730677	0.112435	0.12	0.056	1	ACAD9	1.13627
FBXL17	0.0731077	0.095456	0.141	0.07	1	FBXL17	1.13604
ZNF407	0.0731077	-0.166171	0.054	0.126	1	ZNF407	1.13604
DCAF11	0.0732026	0.145236	0.326	0.224	1	DCAF11	1.13547
UPF3B	0.0732673	-0.167008	0.185	0.287	1	UPF3B	1.13509
RARRES3	0.0732956	-0.121911	0.989	0.979	1	RARRES3	1.13492
GTPBP4	0.0733451	0.132776	0.37	0.266	1	GTPBP4	1.13463
CHST11	0.0733758	0.17186	0.261	0.168	1	CHST11	1.13445
LRRC8B	0.0734746	0.0941515	0.13	0.063	1	LRRC8B	1.13386
TLE3	0.0734881	0.215285	0.337	0.245	1	TLE3	1.13378
WSB2	0.0734902	0.173904	0.272	0.175	1	WSB2	1.13377
TAPT1	0.0736785	0.111113	0.174	0.098	1	TAPT1	1.13266
HSPA13	0.0737204	0.103545	0.141	0.07	1	HSPA13	1.13241
RBM26	0.0737472	0.176482	0.489	0.371	1	RBM26	1.13225
AGMAT	0.0742419	0.0454385	0.196	0.105	1	AGMAT	1.12935
ANKRA2	0.0743373	0.120787	0.141	0.07	1	ANKRA2	1.12879
ATXN2	0.0743379	0.105107	0.37	0.252	1	ATXN2	1.12879
RAB5IF	0.0746327	-0.13826	0.359	0.483	1	RAB5IF	1.12707
IARS2	0.0752183	0.146205	0.304	0.203	1	IARS2	1.12368
UBL7	0.0752251	-0.137635	0.087	0.168	1	UBL7	1.12364
TOX	0.0754697	0.112532	0.446	0.315	1	TOX	1.12223
NUP58	0.0755461	-0.140992	0.13	0.217	1	NUP58	1.12179
FLYWCH1	0.0759999	-0.107287	0.065	0.14	1	FLYWCH1	1.11919
UBQLN1	0.0761655	-0.100314	0.152	0.245	1	UBQLN1	1.11824
ENTPD4	0.0761803	-0.167892	0.152	0.252	1	ENTPD4	1.11816
REPS1	0.0762134	-0.100513	0.054	0.126	1	REPS1	1.11797
FCF1	0.0762134	-0.12587	0.054	0.126	1	FCF1	1.11797
TMUB2	0.0765103	0.117759	0.239	0.147	1	TMUB2	1.11628
PRKCB	0.0766637	-0.215283	0.424	0.497	1	PRKCB	1.11541
MYL12A	0.0766669	0.122569	0.978	0.965	1	MYL12A	1.11539
C2orf68	0.0766994	0.160957	0.228	0.14	1	C2orf68	1.11521
FLAD1	0.0770452	-0.15404	0.098	0.182	1	FLAD1	1.11325
GTF2H3	0.0770605	-0.170735	0.163	0.252	1	GTF2H3	1.11317
NINJ2	0.0772888	0.172416	0.272	0.182	1	NINJ2	1.11188
FYTTD1	0.0776514	0.132738	0.391	0.273	1	FYTTD1	1.10985
IFT27	0.0777136	0.0779614	0.228	0.133	1	IFT27	1.1095
DUS1L	0.077861	0.12925	0.348	0.245	1	DUS1L	1.10868
PNN	0.0780725	-0.133397	0.761	0.853	1	PNN	1.1075
YJU2	0.0781574	-0.0659485	0.076	0.161	1	YJU2	1.10703
CDK4	0.0781743	0.104723	0.207	0.119	1	CDK4	1.10694
RABGAP1L	0.0782947	-0.179567	0.5	0.58	1	RABGAP1L	1.10627
IFI35	0.0783531	-0.202698	0.304	0.392	1	IFI35	1.10594
IRF2BPL	0.0784177	-0.122827	0.065	0.14	1	IRF2BPL	1.10559
SNX6	0.0785068	0.174105	0.826	0.734	1	SNX6	1.10509
ESRRA	0.078526	-0.108222	0.087	0.168	1	ESRRA	1.10499
KLF16	0.0785541	0.104645	0.12	0.056	1	KLF16	1.10483
PNRC2	0.0786655	-0.147658	0.326	0.448	1	PNRC2	1.10422
C6orf62	0.0786895	-0.197321	0.359	0.441	1	C6orf62	1.10408
APOBEC3H	0.0787001	-0.197789	0.141	0.231	1	APOBEC3H	1.10402
CHD1L	0.0787748	-0.0988789	0.054	0.126	1	CHD1L	1.10361
B4GALT3	0.0789538	0.128975	0.228	0.14	1	B4GALT3	1.10263
GBP5	0.0793661	-0.222213	0.467	0.531	1	GBP5	1.10036
EIF2D	0.0797356	-0.132765	0.098	0.182	1	EIF2D	1.09835
NUMB	0.0798842	-0.136284	0.174	0.28	1	NUMB	1.09754
NSD1	0.0799181	0.170815	0.641	0.594	1	NSD1	1.09735
TEX30	0.0799768	0.120738	0.12	0.056	1	TEX30	1.09704
CHMP2A	0.0800557	0.148335	0.728	0.692	1	CHMP2A	1.09661
ACTL6A	0.0800699	0.168536	0.272	0.182	1	ACTL6A	1.09653
KIAA0232	0.080204	-0.144658	0.163	0.259	1	KIAA0232	1.0958
FGFR1OP2	0.0804101	0.148038	0.598	0.462	1	FGFR1OP2	1.09469
RPL7A	0.0806812	-0.0857522	1	1	1	RPL7A	1.09323
NCK2	0.0807301	0.179017	0.478	0.378	1	NCK2	1.09296
ALKBH7	0.0816742	0.152725	0.543	0.413	1	ALKBH7	1.08792
CTBP1	0.0818019	-0.0985009	0.152	0.252	1	CTBP1	1.08724
PIAS1	0.0821424	0.14655	0.315	0.217	1	PIAS1	1.08543
NFYC	0.0825083	0.119192	0.239	0.147	1	NFYC	1.0835
BAZ1B	0.0825101	-0.151898	0.413	0.49	1	BAZ1B	1.08349
COA3	0.0827031	0.111027	0.348	0.238	1	COA3	1.08248
TSSC4	0.0828602	0.153682	0.435	0.322	1	TSSC4	1.08165
ANAPC4	0.0829036	-0.127144	0.12	0.203	1	ANAPC4	1.08143
GUSB	0.0831428	0.132841	0.25	0.161	1	GUSB	1.08018
METTL26	0.083208	0.162925	0.598	0.448	1	METTL26	1.07983
MKRN1	0.0834003	-0.186496	0.239	0.343	1	MKRN1	1.07883
THUMPD3-AS1	0.0834176	-0.200237	0.489	0.566	1	THUMPD3-AS1	1.07874
ANAPC10	0.0836731	0.106798	0.217	0.126	1	ANAPC10	1.07741
TXNDC17	0.0837684	0.149362	0.543	0.462	1	TXNDC17	1.07692
RPS28	0.0837994	0.0756062	1	1	1	RPS28	1.07676
RRAGA	0.0838571	0.170437	0.424	0.308	1	RRAGA	1.07646
KIAA1551	0.0839159	-0.156219	0.772	0.867	1	KIAA1551	1.07616
SVBP	0.083921	-0.131973	0.185	0.294	1	SVBP	1.07613
ACO2	0.0840468	0.0877382	0.304	0.196	1	ACO2	1.07548
BCL2A1	0.0840868	0.18343	0.152	0.084	1	BCL2A1	1.07527
DPYSL2	0.0842295	-0.170505	0.087	0.161	1	DPYSL2	1.07454
DNAJC30	0.0844038	0.0612829	0.174	0.091	1	DNAJC30	1.07364
HNRNPA3	0.0844956	0.0917689	0.924	0.874	1	HNRNPA3	1.07317
AC114760.2	0.0845777	0.0604705	0.152	0.077	1	AC114760.2	1.07274
ULK1	0.0845779	-0.156887	0.065	0.133	1	ULK1	1.07274
DLST	0.0851221	0.0857113	0.12	0.056	1	DLST	1.06996
CCDC47	0.0851401	0.129006	0.37	0.259	1	CCDC47	1.06987
ZADH2	0.0853012	0.101048	0.25	0.154	1	ZADH2	1.06904
ARID5A	0.0855438	0.201431	0.685	0.58	1	ARID5A	1.06781
POU3F1	0.085602	-0.184359	0.12	0.203	1	POU3F1	1.06752
LTN1	0.0856483	0.114884	0.348	0.245	1	LTN1	1.06728
ANP32E	0.0857276	0.131092	0.62	0.503	1	ANP32E	1.06688
ADNP2	0.0857317	0.0790485	0.13	0.063	1	ADNP2	1.06686
GPATCH4	0.0858952	0.121187	0.239	0.154	1	GPATCH4	1.06603
PPIH	0.0859062	0.118373	0.174	0.098	1	PPIH	1.06598
NUDT9	0.0864584	0.101001	0.13	0.063	1	NUDT9	1.06319
LST1	0.0865271	0.145503	0.174	0.098	1	LST1	1.06285
MARK4	0.0865739	0.0759926	0.109	0.049	1	MARK4	1.06261
TSTD1	0.0867792	-0.102626	0.674	0.783	1	TSTD1	1.06158
SNRNP40	0.0868173	0.128818	0.478	0.357	1	SNRNP40	1.06139
XRCC1	0.0868814	-0.0858201	0.054	0.126	1	XRCC1	1.06107
GBP1	0.0871327	0.201777	0.359	0.266	1	GBP1	1.05982
AP3M1	0.0871516	0.118818	0.174	0.098	1	AP3M1	1.05972
ANO6	0.0872611	-0.14534	0.065	0.133	1	ANO6	1.05918
DIAPH1	0.0872621	0.206392	0.62	0.531	1	DIAPH1	1.05917
IFI27L1	0.0874077	0.0638339	0.12	0.056	1	IFI27L1	1.05845
ING3	0.0877928	-0.163035	0.13	0.217	1	ING3	1.05654
GZMA	0.087836	0.360004	0.163	0.091	1	GZMA	1.05633
MAP2K4	0.087836	-0.144943	0.076	0.147	1	MAP2K4	1.05633
ZFAS1	0.0880274	-0.188509	0.554	0.657	1	ZFAS1	1.05538
TYW3	0.0881132	-0.207753	0.196	0.28	1	TYW3	1.05496
NIF3L1	0.0881945	0.0829254	0.109	0.049	1	NIF3L1	1.05456
ATP11C	0.0885689	-0.0977093	0.043	0.105	1	ATP11C	1.05272
VRK3	0.0885701	0.163398	0.38	0.273	1	VRK3	1.05271
NQO2	0.0887971	0.0938901	0.207	0.119	1	NQO2	1.0516
PSMB9	0.0888092	0.0948516	0.913	0.832	1	PSMB9	1.05154
CHID1	0.0888464	-0.135717	0.141	0.231	1	CHID1	1.05136
AEN	0.089014	0.0724728	0.109	0.049	1	AEN	1.05054
SLC35C2	0.0890726	0.112508	0.228	0.14	1	SLC35C2	1.05026
SMAP1	0.0890762	-0.178596	0.315	0.427	1	SMAP1	1.05024
NAA60	0.0891412	0.0957893	0.185	0.105	1	NAA60	1.04992
HCLS1	0.0893721	0.112549	0.728	0.622	1	HCLS1	1.0488
MTHFD1	0.0894152	0.051882	0.13	0.063	1	MTHFD1	1.04859
FRG1	0.0895489	0.147637	0.424	0.336	1	FRG1	1.04794
WHAMM	0.0897633	0.10914	0.185	0.105	1	WHAMM	1.0469
PIN1	0.0898069	0.165517	0.533	0.434	1	PIN1	1.04669
SPICE1	0.0898396	0.0737409	0.109	0.049	1	SPICE1	1.04653
UPP1	0.0899866	0.0779925	0.304	0.203	1	UPP1	1.04582
C1orf109	0.0900125	-0.156826	0.065	0.133	1	C1orf109	1.0457
IQGAP1	0.0901669	-0.199147	0.587	0.65	1	IQGAP1	1.04495
GNAS	0.0903271	0.100482	0.978	0.979	1	GNAS	1.04418
MRPL48	0.0905357	-0.14377	0.13	0.217	1	MRPL48	1.04318
SLC35E2A	0.0905963	-0.14006	0.054	0.119	1	SLC35E2A	1.04289
SCAMP1	0.0907701	-0.0927875	0.065	0.14	1	SCAMP1	1.04206
HIST1H2BC	0.0909287	-0.0899617	0.043	0.105	1	HIST1H2BC	1.0413
METTL17	0.0910339	0.173293	0.272	0.189	1	METTL17	1.0408
MFSD11	0.0911325	0.0942591	0.163	0.091	1	MFSD11	1.04033
TMCO1	0.0912073	-0.117881	0.565	0.657	1	TMCO1	1.03997
KDM5C	0.0913864	-0.12471	0.152	0.252	1	KDM5C	1.03912
SKAP1	0.0915164	0.169649	0.641	0.517	1	SKAP1	1.0385
TOR2A	0.0916505	0.0627307	0.185	0.105	1	TOR2A	1.03787
ZNF708	0.0918275	0.141159	0.283	0.189	1	ZNF708	1.03703
DENND4B	0.0918956	0.137292	0.217	0.133	1	DENND4B	1.03671
IQCB1	0.0921568	-0.0830411	0.065	0.14	1	IQCB1	1.03547
SLC25A11	0.0922544	0.141489	0.391	0.287	1	SLC25A11	1.03501
NR2C2	0.0924528	0.0811972	0.13	0.063	1	NR2C2	1.03408
PAPOLG	0.0924786	0.119409	0.163	0.091	1	PAPOLG	1.03396
UQCC2	0.0925542	0.128672	0.402	0.301	1	UQCC2	1.0336
RNF41	0.0929376	0.114875	0.174	0.098	1	RNF41	1.03181
ACOT13	0.0930142	0.123674	0.293	0.196	1	ACOT13	1.03145
ZDHHC5	0.0931435	-0.124634	0.098	0.175	1	ZDHHC5	1.03085
MAPKAPK2	0.093312	-0.143661	0.228	0.329	1	MAPKAPK2	1.03006
ZNF587	0.0933387	-0.109474	0.043	0.105	1	ZNF587	1.02994
CERS4	0.0933758	0.122109	0.141	0.077	1	CERS4	1.02977
GLG1	0.0933931	0.149984	0.489	0.357	1	GLG1	1.02969
AP4S1	0.0935495	-0.134452	0.065	0.133	1	AP4S1	1.02896
BMI1	0.0935604	0.113304	0.152	0.084	1	BMI1	1.02891
PSAP	0.0935946	-0.183223	0.25	0.357	1	PSAP	1.02875
BCAP29	0.0938739	-0.101651	0.152	0.259	1	BCAP29	1.02746
QSER1	0.0940604	0.0784231	0.109	0.049	1	QSER1	1.02659
TMED2	0.0942079	0.140437	0.543	0.441	1	TMED2	1.02591
NPC1	0.0942686	-0.104136	0.065	0.14	1	NPC1	1.02563
CAPG	0.0943107	-0.122283	0.174	0.273	1	CAPG	1.02544
DNTTIP2	0.0947283	-0.172972	0.283	0.385	1	DNTTIP2	1.02352
SRI	0.0947893	-0.154879	0.598	0.706	1	SRI	1.02324
NCK1	0.0948468	-0.163374	0.337	0.448	1	NCK1	1.02298
NDUFAF6	0.0949233	0.064133	0.109	0.049	1	NDUFAF6	1.02263
POLI	0.0949951	-0.123476	0.065	0.133	1	POLI	1.0223
ABCF2.1	0.0950374	0.0737301	0.196	0.112	1	ABCF2.1	1.02211
CYSLTR1	0.0950833	0.0986117	0.576	0.434	1	CYSLTR1	1.0219
CASP3	0.0950955	0.0737789	0.293	0.196	1	CASP3	1.02184
C15orf53	0.0953386	0.121959	0.152	0.084	1	C15orf53	1.02073
ROCK1	0.095454	-0.188876	0.609	0.664	1	ROCK1	1.02021
APPL2	0.0959139	0.127685	0.163	0.091	1	APPL2	1.01812
PPP4R1	0.0959139	-0.112707	0.076	0.147	1	PPP4R1	1.01812
DEPDC5	0.096296	-0.111819	0.054	0.119	1	DEPDC5	1.01639
TBC1D2B	0.0964685	0.149838	0.348	0.252	1	TBC1D2B	1.01561
MRM2	0.0965096	0.148563	0.217	0.14	1	MRM2	1.01543
PSMD7	0.0965718	0.17086	0.63	0.531	1	PSMD7	1.01515
TBC1D14	0.0966131	0.10473	0.163	0.091	1	TBC1D14	1.01496
SFXN3	0.0966131	0.103371	0.163	0.091	1	SFXN3	1.01496
TBCE	0.0966315	-0.110515	0.043	0.105	1	TBCE	1.01488
FIP1L1	0.096692	-0.156456	0.261	0.357	1	FIP1L1	1.01461
TRMT2A	0.0970769	-0.0793456	0.054	0.119	1	TRMT2A	1.01288
RPS6KA3	0.0978268	0.0510068	0.489	0.364	1	RPS6KA3	1.00954
RBMXL1	0.0980236	-0.136883	0.076	0.147	1	RBMXL1	1.00867
PSMB7	0.0981246	-0.160251	0.424	0.566	1	PSMB7	1.00822
LIG1	0.0983124	-0.0902109	0.043	0.105	1	LIG1	1.00739
HELQ	0.0986028	0.152239	0.141	0.077	1	HELQ	1.00611
PRRC1	0.0986028	0.122793	0.141	0.077	1	PRRC1	1.00611
RAB4A	0.0986491	0.131699	0.37	0.259	1	RAB4A	1.00591
EED	0.0988132	0.117907	0.391	0.287	1	EED	1.00519
CHMP4B	0.0988845	-0.197716	0.217	0.301	1	CHMP4B	1.00487
NRAS	0.0989798	0.132222	0.207	0.126	1	NRAS	1.00445
MRPL49	0.0991329	0.088952	0.217	0.133	1	MRPL49	1.00378
TRIM21	0.099136	0.103588	0.196	0.119	1	TRIM21	1.00377
FKBP2	0.0991919	0.164097	0.554	0.483	1	FKBP2	1.00352
PSMD10	0.099451	-0.102344	0.054	0.119	1	PSMD10	1.00239
DNMT1	0.0996028	0.138676	0.457	0.343	1	DNMT1	1.00173
KDM4C	0.100176	-0.160151	0.12	0.203	1	KDM4C	0.999235
ZBTB6	0.100424	0.0850813	0.174	0.098	1	ZBTB6	0.998164
NDUFAF8	0.100607	0.089123	0.478	0.35	1	NDUFAF8	0.99737
MYO9B	0.100725	-0.162649	0.239	0.322	1	MYO9B	0.996865
ELP3	0.100837	0.0982543	0.152	0.084	1	ELP3	0.996378
KCTD9	0.100894	-0.134827	0.076	0.147	1	KCTD9	0.996135
MINOS1	0.101567	0.101847	0.609	0.531	1	MINOS1	0.993247
SPON1	0.101622	0.143438	0.163	0.091	1	SPON1	0.993012
MAN2C1	0.101756	-0.208492	0.13	0.203	1	MAN2C1	0.99244
ARHGAP30	0.101959	0.187083	0.685	0.594	1	ARHGAP30	0.991574
TMEM161B-AS1	0.102423	-0.160426	0.076	0.14	1	TMEM161B-AS1	0.989604
TRMT1	0.10299	0.139821	0.185	0.112	1	TRMT1	0.987206
CCR5	0.103099	0.107317	0.196	0.119	1	CCR5	0.986745
NUDT2	0.10318	-0.139407	0.109	0.182	1	NUDT2	0.986404
HNRNPA1	0.103292	-0.114884	0.946	0.916	1	HNRNPA1	0.985933
OSER1	0.103316	0.16649	0.217	0.14	1	OSER1	0.985832
VEZF1	0.103316	0.119291	0.217	0.14	1	VEZF1	0.985832
RRP1B	0.10342	0.125622	0.337	0.238	1	RRP1B	0.985396
HBP1	0.103472	-0.147541	0.272	0.364	1	HBP1	0.985177
SNX3	0.103513	0.170222	0.598	0.538	1	SNX3	0.985007
NAA38	0.103771	0.193672	0.478	0.385	1	NAA38	0.983926
PSPC1	0.103943	0.108719	0.359	0.266	1	PSPC1	0.983205
CASC3	0.103953	0.0747284	0.228	0.133	1	CASC3	0.983162
PLD3	0.104061	-0.205145	0.065	0.126	1	PLD3	0.982713
APOLD1	0.104109	-0.133589	0.098	0.182	1	APOLD1	0.98251
RMC1	0.104338	-0.090983	0.054	0.119	1	RMC1	0.981559
AGO2	0.104366	-0.190545	0.174	0.259	1	AGO2	0.981439
COX17	0.1044	0.0996382	0.543	0.434	1	COX17	0.981301
CD58	0.104465	0.156998	0.337	0.245	1	CD58	0.981031
EIF3M	0.104555	0.126543	0.641	0.559	1	EIF3M	0.980657
STARD10	0.104705	-0.146762	0.087	0.154	1	STARD10	0.980032
ARFGAP2	0.104826	0.141638	0.37	0.287	1	ARFGAP2	0.979532
NDUFAF5	0.10484	0.0325822	0.109	0.049	1	NDUFAF5	0.979473
EXOG	0.104902	0.168792	0.217	0.147	1	EXOG	0.979214
PDAP1	0.104976	-0.150224	0.489	0.594	1	PDAP1	0.978908
GRN	0.105325	-0.0940388	0.076	0.147	1	GRN	0.977469
SLC25A45	0.105357	0.164814	0.272	0.182	1	SLC25A45	0.977336
OSTC	0.105506	-0.152899	0.402	0.517	1	OSTC	0.976724
MOB2	0.105521	0.10395	0.315	0.21	1	MOB2	0.976661
UTP6	0.105784	0.140327	0.25	0.175	1	UTP6	0.97558
ADGRE5	0.105847	0.0396665	0.304	0.196	1	ADGRE5	0.975321
TOB1	0.105884	-0.0943369	0.12	0.203	1	TOB1	0.975171
IPO7	0.105945	0.12727	0.272	0.182	1	IPO7	0.974921
C12orf10	0.106104	-0.156494	0.272	0.35	1	C12orf10	0.974267
SUN2	0.10622	-0.215211	0.467	0.51	1	SUN2	0.973796
PDIA3	0.1063	0.147362	0.739	0.692	1	PDIA3	0.973467
OSTM1	0.106978	0.0661697	0.25	0.154	1	OSTM1	0.970704
JADE1	0.107273	-0.171587	0.141	0.217	1	JADE1	0.969508
ITGA4	0.107321	-0.138462	0.685	0.741	1	ITGA4	0.969316
PSENEN	0.107367	0.149267	0.272	0.189	1	PSENEN	0.969127
TRA2B	0.107559	-0.160644	0.38	0.476	1	TRA2B	0.968351
GMPR2	0.10768	0.122387	0.37	0.28	1	GMPR2	0.967866
FOPNL	0.107881	0.119054	0.196	0.119	1	FOPNL	0.967055
MAP3K14	0.107881	0.0862838	0.196	0.119	1	MAP3K14	0.967055
PACS1	0.107915	-0.0931914	0.239	0.35	1	PACS1	0.966918
ARID1A	0.108377	0.140663	0.424	0.322	1	ARID1A	0.965062
CSKMT	0.108554	0.114559	0.13	0.07	1	CSKMT	0.964356
ENOSF1	0.108559	0.0862203	0.152	0.084	1	ENOSF1	0.964336
RNF145	0.108599	0.190696	0.337	0.259	1	RNF145	0.964173
SEC63	0.108942	-0.176842	0.163	0.245	1	SEC63	0.962805
ZFAND2B	0.109034	-0.119331	0.174	0.259	1	ZFAND2B	0.962439
ARAF	0.109134	0.0943072	0.163	0.091	1	ARAF	0.96204
TAP1	0.10935	0.119625	0.685	0.58	1	TAP1	0.961183
MGAT2	0.109524	0.0739636	0.272	0.182	1	MGAT2	0.960489
HLA-DQA1	0.109819	-0.231146	0.12	0.196	1	HLA-DQA1	0.959323
PLRG1	0.110043	-0.161029	0.25	0.343	1	PLRG1	0.95844
SIT1	0.110404	0.182458	0.533	0.434	1	SIT1	0.957013
C14orf119	0.110427	-0.10167	0.413	0.517	1	C14orf119	0.956923
CCNB1IP1	0.110589	0.103804	0.141	0.077	1	CCNB1IP1	0.956287
RACK1	0.110629	-0.0879781	0.989	0.986	1	RACK1	0.95613
RPS8	0.11063	0.0677237	1	1	1	RPS8	0.956128
TEFM	0.110936	0.116684	0.207	0.126	1	TEFM	0.954926
LRRC8D	0.11106	-0.112408	0.13	0.217	1	LRRC8D	0.954441
UBA1	0.111313	-0.111811	0.152	0.238	1	UBA1	0.953453
CAPN1	0.11135	-0.155892	0.25	0.336	1	CAPN1	0.953311
HERC6	0.111428	0.102042	0.141	0.077	1	HERC6	0.953007
MTRF1L	0.111428	0.0895267	0.141	0.077	1	MTRF1L	0.953007
UBE2B	0.111542	-0.145036	0.652	0.811	1	UBE2B	0.95256
TDG	0.111565	0.126788	0.272	0.189	1	TDG	0.952471
PPP3CA	0.111748	0.116061	0.12	0.063	1	PPP3CA	0.951761
TIMM9	0.111846	0.138879	0.217	0.14	1	TIMM9	0.95138
PARP9	0.111881	0.0747702	0.413	0.301	1	PARP9	0.951244
TAB2	0.111882	-0.100235	0.228	0.329	1	TAB2	0.951239
ZCCHC7	0.111927	0.114828	0.174	0.105	1	ZCCHC7	0.951067
H1FX	0.11211	-0.211826	0.717	0.811	1	H1FX	0.950354
DPM1	0.112242	0.125207	0.293	0.203	1	DPM1	0.949845
FANCF	0.112259	0.0629474	0.163	0.091	1	FANCF	0.949779
TOLLIP	0.112332	0.122098	0.207	0.126	1	TOLLIP	0.949495
SDF2L1	0.11242	-0.206573	0.337	0.42	1	SDF2L1	0.949156
NDUFS1	0.112512	0.149855	0.304	0.224	1	NDUFS1	0.9488
ASB6	0.112903	-0.0625687	0.054	0.119	1	ASB6	0.947293
TCAIM	0.113119	0.091012	0.141	0.077	1	TCAIM	0.946463
RPS19BP1	0.113229	0.0907313	0.63	0.524	1	RPS19BP1	0.946044
MRPL36	0.113326	-0.126271	0.326	0.42	1	MRPL36	0.945669
SCAF8	0.113923	-0.135453	0.12	0.196	1	SCAF8	0.943388
EMD	0.113968	0.12771	0.283	0.196	1	EMD	0.943216
ARPC4	0.114128	0.147445	0.739	0.657	1	ARPC4	0.942606
LBH	0.114154	0.158493	0.641	0.531	1	LBH	0.942509
FLT3LG	0.114282	0.127995	0.228	0.147	1	FLT3LG	0.942022
ANP32B	0.114354	0.0963333	0.837	0.818	1	ANP32B	0.94175
UBE2H	0.114907	0.163108	0.391	0.301	1	UBE2H	0.939654
ZNF567	0.114975	0.114081	0.174	0.105	1	ZNF567	0.939397
BEX3	0.115026	0.143918	0.163	0.098	1	BEX3	0.939206
TRIM11	0.115048	-0.150762	0.141	0.217	1	TRIM11	0.93912
NAA16	0.115463	-0.0771447	0.065	0.133	1	NAA16	0.937557
YKT6	0.116398	0.110131	0.12	0.063	1	YKT6	0.934056
TMEM41B	0.116527	0.0766939	0.228	0.14	1	TMEM41B	0.933572
TMBIM4	0.116632	0.0812425	0.815	0.811	1	TMBIM4	0.933184
LRWD1	0.11674	0.0613678	0.152	0.084	1	LRWD1	0.93278
GLI4	0.116989	0.167147	0.152	0.091	1	GLI4	0.931854
TAF2	0.117304	0.141469	0.174	0.105	1	TAF2	0.930688
IFITM1	0.117411	-0.133837	0.196	0.287	1	IFITM1	0.930292
RECQL	0.117456	0.175581	0.348	0.273	1	RECQL	0.930123
RNF207	0.117491	-0.139363	0.054	0.112	1	RNF207	0.929996
STX5	0.117517	0.0833471	0.25	0.161	1	STX5	0.929898
CSNK1G1	0.117695	0.116554	0.174	0.105	1	CSNK1G1	0.929242
EXOSC6	0.1177	0.0514146	0.37	0.252	1	EXOSC6	0.929223
CERS2	0.117958	0.115038	0.326	0.238	1	CERS2	0.928273
HNRNPUL1	0.117958	-0.161029	0.413	0.476	1	HNRNPUL1	0.928271
GART	0.117993	0.12602	0.239	0.161	1	GART	0.928143
DNAJB12	0.118249	0.116455	0.272	0.182	1	DNAJB12	0.927203
ADIPOR2	0.118316	-0.125163	0.065	0.126	1	ADIPOR2	0.926956
HLA-F	0.118351	0.105544	0.837	0.769	1	HLA-F	0.926829
SMARCA5	0.118382	0.15891	0.63	0.497	1	SMARCA5	0.926714
CWC27	0.118422	0.127085	0.272	0.189	1	CWC27	0.926566
TMEM14A	0.118668	-0.117198	0.141	0.224	1	TMEM14A	0.925666
MRPS34	0.118713	0.125004	0.674	0.58	1	MRPS34	0.925501
ANAPC7	0.118863	-0.114231	0.12	0.196	1	ANAPC7	0.924953
TOR1A	0.119494	0.0972776	0.304	0.203	1	TOR1A	0.922656
CINP	0.119526	-0.0894081	0.141	0.231	1	CINP	0.922537
NUP210	0.119944	0.0979741	0.413	0.301	1	NUP210	0.921021
MINPP1	0.120089	0.0827503	0.141	0.077	1	MINPP1	0.920496
ORAI3	0.120089	0.0788956	0.141	0.077	1	ORAI3	0.920496
PAFAH1B1	0.120259	0.125859	0.587	0.49	1	PAFAH1B1	0.919882
BTF3	0.120631	-0.0899679	0.967	0.979	1	BTF3	0.918543
INTS11	0.12065	-0.15596	0.152	0.231	1	INTS11	0.918473
DCLRE1C	0.120956	0.120685	0.261	0.182	1	DCLRE1C	0.917371
ACTA2	0.121053	0.126695	0.239	0.161	1	ACTA2	0.917024
EIF4ENIF1	0.121078	0.0859604	0.13	0.07	1	EIF4ENIF1	0.916935
PARP14	0.121171	-0.131169	0.446	0.559	1	PARP14	0.916601
ARSA	0.121206	0.147671	0.109	0.056	1	ARSA	0.916475
MTX1	0.121616	0.121598	0.261	0.182	1	MTX1	0.915008
TOMM7	0.121783	-0.112844	0.935	0.951	1	TOMM7	0.914414
CYREN	0.122058	0.0501179	0.163	0.091	1	CYREN	0.913432
PIK3R5	0.122072	0.102136	0.174	0.105	1	PIK3R5	0.913383
SEL1L3	0.122083	0.0637073	0.293	0.203	1	SEL1L3	0.913345
GRB2	0.122098	0.121592	0.63	0.538	1	GRB2	0.913293
SEC62	0.122119	0.0976082	0.63	0.531	1	SEC62	0.913217
PTRH1	0.122177	0.0808412	0.12	0.063	1	PTRH1	0.913012
SIN3A	0.122204	0.108358	0.315	0.231	1	SIN3A	0.912916
ACSS1	0.122219	-0.102953	0.054	0.112	1	ACSS1	0.912862
MTF1	0.122219	-0.108364	0.054	0.112	1	MTF1	0.912862
ATP5PF	0.122727	-0.118879	0.761	0.846	1	ATP5PF	0.91106
RFX5	0.122788	0.0828696	0.141	0.077	1	RFX5	0.910843
ARL4C	0.122935	0.159581	0.739	0.699	1	ARL4C	0.910325
RDH11	0.122979	0.124626	0.402	0.301	1	RDH11	0.910168
SNU13	0.123035	-0.118389	0.641	0.741	1	SNU13	0.909971
HOXB2	0.123039	0.138007	0.293	0.203	1	HOXB2	0.909958
SMARCAD1	0.123127	0.12862	0.239	0.161	1	SMARCAD1	0.909645
GTF2F2	0.123127	0.123198	0.239	0.161	1	GTF2F2	0.909645
NAP1L4	0.123175	-0.0999921	0.783	0.811	1	NAP1L4	0.909479
AC068491.3	0.123267	0.123014	0.109	0.056	1	AC068491.3	0.909153
FBXL3	0.123434	-0.113098	0.207	0.301	1	FBXL3	0.908565
NPAT	0.123613	0.146797	0.261	0.182	1	NPAT	0.907935
WDR11	0.123613	-0.133433	0.163	0.245	1	WDR11	0.907935
SCAMP2	0.123658	0.158407	0.424	0.329	1	SCAMP2	0.907778
FOXJ3	0.123698	-0.128026	0.065	0.126	1	FOXJ3	0.907636
LIMD1	0.123903	0.119387	0.13	0.07	1	LIMD1	0.906917
SKI	0.123903	0.0998973	0.13	0.07	1	SKI	0.906917
MRPS12	0.123927	0.128541	0.489	0.385	1	MRPS12	0.906836
GLRX5	0.124067	-0.141789	0.391	0.483	1	GLRX5	0.906345
NME1	0.124178	0.0988909	0.337	0.238	1	NME1	0.905955
LRRC14	0.124206	-0.108633	0.076	0.14	1	LRRC14	0.905858
NDUFA11	0.124237	-0.0667701	0.587	0.72	1	NDUFA11	0.90575
ERCC4	0.124513	0.107776	0.174	0.105	1	ERCC4	0.904787
ZNF22	0.124657	0.0676824	0.457	0.329	1	ZNF22	0.904285
MRI1	0.124702	-0.131643	0.13	0.203	1	MRI1	0.904126
PREPL	0.124956	-0.137369	0.087	0.154	1	PREPL	0.903244
AP2B1	0.125228	-0.163341	0.261	0.343	1	AP2B1	0.902297
HDGF	0.125259	0.136053	0.424	0.308	1	HDGF	0.902192
ANKRD46	0.125355	0.116498	0.109	0.056	1	ANKRD46	0.901857
NONO	0.125386	-0.20156	0.435	0.503	1	NONO	0.90175
CXCR4	0.125633	-0.179901	0.717	0.839	1	CXCR4	0.900895
PPP1R18	0.125869	0.130627	0.598	0.469	1	PPP1R18	0.90008
ERCC3	0.126107	-0.108316	0.054	0.112	1	ERCC3	0.89926
PSMD11	0.126151	-0.134172	0.435	0.51	1	PSMD11	0.899109
TATDN1	0.126216	0.102936	0.228	0.147	1	TATDN1	0.898885
CD4	0.126306	0.115058	0.696	0.566	1	CD4	0.898575
PGLS	0.126404	0.118383	0.62	0.517	1	PGLS	0.898239
PA2G4	0.126428	0.118413	0.663	0.58	1	PA2G4	0.898157
ZNF714	0.12646	-0.134096	0.065	0.126	1	ZNF714	0.898047
BORCS5	0.12648	0.0751158	0.25	0.168	1	BORCS5	0.897977
EXOSC3	0.126669	0.136026	0.283	0.203	1	EXOSC3	0.897328
TDRD3	0.126676	-0.152644	0.12	0.189	1	TDRD3	0.897305
BRD9	0.126982	-0.122086	0.109	0.182	1	BRD9	0.896256
VPS37A	0.126991	-0.0760386	0.087	0.161	1	VPS37A	0.896227
CBX5	0.127189	0.0843245	0.446	0.322	1	CBX5	0.89555
TRIM13	0.127256	-0.127835	0.293	0.392	1	TRIM13	0.895323
S1PR4	0.127313	0.227555	0.674	0.58	1	S1PR4	0.895127
DELE1	0.127477	-0.118299	0.087	0.154	1	DELE1	0.894569
SLC2A3	0.127879	0.193706	0.413	0.336	1	SLC2A3	0.893199
CDADC1	0.128178	0.0930496	0.12	0.063	1	CDADC1	0.892188
LINC00909	0.128256	-0.164784	0.141	0.217	1	LINC00909	0.891921
COX6A1	0.128324	0.0890317	0.837	0.797	1	COX6A1	0.891693
CDC16	0.128327	-0.0880052	0.065	0.126	1	CDC16	0.89168
UBN1	0.128508	-0.110589	0.217	0.315	1	UBN1	0.89107
HELLS	0.128641	-0.189959	0.174	0.252	1	HELLS	0.890621
EHMT1	0.129288	-0.159333	0.239	0.308	1	EHMT1	0.888442
GHITM	0.129387	-0.132881	0.533	0.608	1	GHITM	0.88811
DNAJB2	0.129505	-0.127558	0.076	0.14	1	DNAJB2	0.887712
PEX13	0.129742	0.0705095	0.141	0.077	1	PEX13	0.886919
RPL26	0.129832	-0.0886731	1	1	1	RPL26	0.886619
MAPK1IP1L	0.129879	-0.173943	0.293	0.364	1	MAPK1IP1L	0.88646
NEK7	0.129984	0.0945516	0.261	0.168	1	NEK7	0.886112
METTL5	0.130091	0.0875985	0.446	0.343	1	METTL5	0.885752
GCA	0.130228	0.106433	0.12	0.063	1	GCA	0.885295
LINC002481	0.130228	0.0985406	0.12	0.063	1	LINC002481	0.885295
CD27	0.130316	0.157102	0.674	0.552	1	CD27	0.885003
RBBP6	0.130861	-0.155326	0.326	0.413	1	RBBP6	0.88319
NCDN	0.130899	-0.144416	0.087	0.154	1	NCDN	0.883063
MEF2D	0.130923	0.112911	0.207	0.133	1	MEF2D	0.882984
MRPL39	0.130975	0.0620597	0.207	0.126	1	MRPL39	0.882811
CUEDC2	0.131021	0.0909551	0.315	0.231	1	CUEDC2	0.882659
SRSF9	0.13104	0.141816	0.783	0.706	1	SRSF9	0.882597
NUP43	0.131169	-0.139689	0.065	0.126	1	NUP43	0.882167
SH3BP1	0.131493	0.117108	0.326	0.238	1	SH3BP1	0.881096
MAPK1	0.131553	0.142622	0.304	0.21	1	MAPK1	0.880899
ARID4A	0.131573	-0.140269	0.37	0.462	1	ARID4A	0.880832
CLU	0.13169	0.0601971	0.13	0.07	1	CLU	0.880448
DNAJB9	0.131765	0.122776	0.272	0.196	1	DNAJB9	0.880199
CORO7	0.131848	-0.117081	0.098	0.168	1	CORO7	0.879928
ISCU	0.131911	0.125647	0.859	0.79	1	ISCU	0.879718
SLC46A3	0.132119	-0.115998	0.054	0.112	1	SLC46A3	0.879033
SUN1	0.132304	0.09548	0.12	0.063	1	SUN1	0.878427
RETREG2	0.132363	0.215405	0.272	0.21	1	RETREG2	0.878234
RPL22L1	0.132492	0.106123	0.446	0.357	1	RPL22L1	0.87781
XAB2	0.132542	0.116402	0.196	0.126	1	XAB2	0.877645
SAP30	0.132637	-0.115481	0.087	0.154	1	SAP30	0.877335
IRAK1	0.132677	0.112975	0.152	0.091	1	IRAK1	0.877204
AC017002.3	0.132824	0.130171	0.228	0.154	1	AC017002.3	0.876722
INTS2	0.132882	0.0957194	0.109	0.056	1	INTS2	0.876534
B3GNTL1	0.133143	-0.0864863	0.054	0.112	1	B3GNTL1	0.875683
ZNF43	0.133143	-0.0913186	0.054	0.112	1	ZNF43	0.875683
TRAPPC2L	0.133317	-0.134529	0.337	0.42	1	TRAPPC2L	0.875113
MCM9	0.133351	0.0905848	0.12	0.063	1	MCM9	0.875002
FNTA	0.133354	-0.149249	0.359	0.434	1	FNTA	0.874994
ACAT1	0.133511	0.0499633	0.217	0.133	1	ACAT1	0.874481
FAR1	0.133929	-0.145528	0.098	0.161	1	FAR1	0.873127
LTA	0.134159	0.435379	0.228	0.161	1	LTA	0.872381
TRPC4AP	0.134323	-0.0434819	0.076	0.147	1	TRPC4AP	0.871851
FAM129A	0.134699	-0.228661	0.326	0.385	1	FAM129A	0.870637
CMPK1	0.134702	0.157456	0.565	0.497	1	CMPK1	0.870626
AFF4	0.134793	-0.102468	0.185	0.28	1	AFF4	0.870331
JUN	0.134838	0.183136	0.565	0.448	1	JUN	0.870187
ANXA2R	0.134979	-0.123162	0.076	0.14	1	ANXA2R	0.869733
DNAJC13	0.135034	-0.09472	0.065	0.126	1	DNAJC13	0.869557
ACER3	0.135095	0.0889927	0.109	0.056	1	ACER3	0.86936
MAGT1	0.135209	0.119125	0.228	0.147	1	MAGT1	0.868994
PPME1	0.135277	-0.0943573	0.087	0.154	1	PPME1	0.868776
EIF4G1	0.135597	0.0574778	0.413	0.301	1	EIF4G1	0.86775
UHRF2	0.135803	-0.11804	0.109	0.182	1	UHRF2	0.867091
ROCK2	0.136029	-0.117781	0.13	0.203	1	ROCK2	0.866369
IER2	0.136123	0.115467	0.609	0.517	1	IER2	0.866067
KATNBL1	0.136163	-0.0454974	0.185	0.28	1	KATNBL1	0.865942
PRPF38B	0.136212	-0.100083	0.63	0.706	1	PRPF38B	0.865785
ARHGAP27	0.136231	0.106267	0.163	0.098	1	ARHGAP27	0.865725
C12orf45	0.136241	0.146258	0.228	0.154	1	C12orf45	0.865692
IPO9	0.136604	0.0594453	0.207	0.126	1	IPO9	0.864538
PCSK7	0.136872	0.0631782	0.728	0.608	1	PCSK7	0.863686
LAS1L	0.136999	-0.0987218	0.065	0.126	1	LAS1L	0.863283
ZNF428	0.137144	0.148821	0.402	0.301	1	ZNF428	0.862824
COX14	0.137238	-0.107438	0.63	0.692	1	COX14	0.862527
NDUFV2-AS1	0.137337	0.094036	0.109	0.056	1	NDUFV2-AS1	0.862212
AP5M1	0.137429	0.0890049	0.261	0.175	1	AP5M1	0.86192
RPAP3	0.137456	0.10727	0.196	0.126	1	RPAP3	0.861835
PSMG4	0.13755	0.132304	0.283	0.203	1	PSMG4	0.861541
SH2D1A	0.137726	-0.0807188	0.554	0.657	1	SH2D1A	0.860984
TRIB1	0.137782	-0.0984015	0.076	0.14	1	TRIB1	0.860807
HENMT1	0.137789	0.109739	0.185	0.112	1	HENMT1	0.860784
IFT20	0.137843	-0.126477	0.217	0.301	1	IFT20	0.860614
CANT1	0.138069	0.119289	0.185	0.119	1	CANT1	0.859905
EBAG9	0.138087	0.0930525	0.272	0.189	1	EBAG9	0.859847
UBE2Z	0.138235	-0.17387	0.261	0.336	1	UBE2Z	0.859383
MPND	0.138351	-0.0725851	0.054	0.112	1	MPND	0.859016
MIS18A	0.138469	0.0905556	0.109	0.056	1	MIS18A	0.858648
ARHGAP12	0.138507	-0.122285	0.087	0.147	1	ARHGAP12	0.858527
PSMB3	0.138664	-0.148244	0.772	0.811	1	PSMB3	0.858036
HLF	0.138726	-0.0787491	0.076	0.14	1	HLF	0.857841
MBD2	0.138851	-0.127011	0.5	0.587	1	MBD2	0.857452
KDM7A	0.13886	-0.0903378	0.087	0.154	1	KDM7A	0.857422
PDHA1	0.138959	0.122845	0.283	0.203	1	PDHA1	0.857114
PPP2R5A	0.139025	0.0662975	0.304	0.21	1	PPP2R5A	0.856906
RPS20	0.139302	0.0828369	1	0.979	1	RPS20	0.856044
PARP11	0.139314	0.0485408	0.152	0.084	1	PARP11	0.856006
FDFT1	0.139379	-0.153857	0.315	0.399	1	FDFT1	0.855802
ZNF253	0.139521	0.137194	0.13	0.077	1	ZNF253	0.85536
EVA1B	0.139559	0.120371	0.37	0.28	1	EVA1B	0.855242
EPG5	0.139772	0.0669506	0.12	0.063	1	EPG5	0.854581
HSP90B1	0.139949	-0.118396	0.5	0.594	1	HSP90B1	0.85403
RBM6	0.140159	0.101845	0.543	0.434	1	RBM6	0.85338
B3GALT6	0.140355	-0.126828	0.109	0.175	1	B3GALT6	0.852771
SLC9A9	0.140526	-0.107146	0.283	0.385	1	SLC9A9	0.852245
SPAG16	0.140571	-0.109828	0.12	0.189	1	SPAG16	0.852105
CHPF	0.140754	0.0748429	0.109	0.056	1	CHPF	0.85154
CTSS	0.140977	-0.135959	0.326	0.42	1	CTSS	0.850852
MTF2	0.141245	-0.132329	0.25	0.336	1	MTF2	0.850028
RASSF5	0.141345	0.0940495	0.5	0.378	1	RASSF5	0.84972
IL6R	0.141951	0.085087	0.283	0.196	1	IL6R	0.84786
STT3A	0.142071	0.114552	0.152	0.091	1	STT3A	0.847496
NNT-AS1	0.142071	-0.163383	0.109	0.175	1	NNT-AS1	0.847493
WDR26	0.142468	0.061441	0.413	0.287	1	WDR26	0.846283
PIGK	0.142553	-0.0908254	0.076	0.14	1	PIGK	0.846022
NDE1	0.142634	0.125386	0.261	0.175	1	NDE1	0.845776
HECTD4	0.142675	0.0585854	0.174	0.105	1	HECTD4	0.845652
RASGRP1	0.14274	0.166305	0.598	0.524	1	RASGRP1	0.845455
CBLB	0.14297	-0.133311	0.239	0.336	1	CBLB	0.844755
GCFC2	0.143067	0.0741364	0.109	0.056	1	GCFC2	0.84446
CBWD1	0.143218	-0.143914	0.076	0.133	1	CBWD1	0.844001
C12orf43	0.143366	-0.10025	0.109	0.182	1	C12orf43	0.843555
FOXN2	0.143403	0.138094	0.228	0.161	1	FOXN2	0.843442
AL135925.1	0.143724	0.113477	0.141	0.084	1	AL135925.1	0.842471
OTUB1	0.143919	-0.12508	0.293	0.385	1	OTUB1	0.841882
RBM42	0.144076	0.0940484	0.228	0.154	1	RBM42	0.841408
PFDN1	0.144127	0.152138	0.413	0.343	1	PFDN1	0.841253
DUSP22	0.144182	0.0786038	0.12	0.063	1	DUSP22	0.841089
SPTLC2	0.144258	0.0831915	0.261	0.182	1	SPTLC2	0.840859
CCDC69	0.145011	-0.207948	0.239	0.308	1	CCDC69	0.838598
EMC8	0.145015	-0.0943752	0.163	0.245	1	EMC8	0.838588
SMC5	0.145191	0.129676	0.446	0.378	1	SMC5	0.838059
FAM200A	0.145301	0.0498659	0.12	0.063	1	FAM200A	0.837731
CWF19L2	0.145707	-0.105682	0.239	0.329	1	CWF19L2	0.836519
AK3	0.145789	-0.115517	0.141	0.217	1	AK3	0.836276
DRAM2	0.145805	-0.105662	0.185	0.266	1	DRAM2	0.836229
ATIC	0.145805	-0.143379	0.185	0.266	1	ATIC	0.836228
HLA-DPB1	0.145898	-0.177491	0.598	0.643	1	HLA-DPB1	0.835951
MAIP1	0.145968	0.0878165	0.152	0.091	1	MAIP1	0.835742
DEF8	0.146221	0.0539954	0.13	0.07	1	DEF8	0.834989
PBXIP1	0.146263	-0.150367	0.565	0.636	1	PBXIP1	0.834867
LRRC41	0.146432	-0.131696	0.109	0.175	1	LRRC41	0.834363
TMEM170A	0.146493	0.100129	0.228	0.154	1	TMEM170A	0.834183
RBBP7	0.146567	-0.192808	0.228	0.287	1	RBBP7	0.833963
SNRPD1	0.146714	0.115797	0.609	0.51	1	SNRPD1	0.833528
SNAP47	0.146763	-0.101433	0.228	0.322	1	SNAP47	0.833382
AKAP5	0.147189	0.187744	0.163	0.105	1	AKAP5	0.832125
RNF170	0.1473	0.0586729	0.207	0.133	1	RNF170	0.831796
RASA2	0.147302	-0.124098	0.13	0.203	1	RASA2	0.831792
SGTA	0.14745	-0.109275	0.076	0.14	1	SGTA	0.831354
GTF2I	0.147733	-0.123885	0.424	0.51	1	GTF2I	0.830524
AHR	0.147908	-0.132199	0.087	0.147	1	AHR	0.830009
KANSL1	0.148107	0.0990581	0.62	0.524	1	KANSL1	0.829424
PRR14L	0.148121	0.103306	0.228	0.154	1	PRR14L	0.829383
UBC	0.148463	0.0912253	1	0.965	1	UBC	0.828381
POMP	0.14849	-0.128159	0.685	0.776	1	POMP	0.828301
ZBTB1	0.148625	-0.184156	0.293	0.357	1	ZBTB1	0.827909
BTBD1	0.148874	-0.12957	0.087	0.147	1	BTBD1	0.827182
TMEM121	0.148979	0.0751268	0.109	0.056	1	TMEM121	0.826875
TMEM129	0.148979	0.0636786	0.109	0.056	1	TMEM129	0.826875
ATAD1	0.149017	-0.0983521	0.141	0.217	1	ATAD1	0.826765
ABCC1	0.149098	-0.153402	0.109	0.175	1	ABCC1	0.826529
PTK2B	0.149161	0.0685151	0.174	0.105	1	PTK2B	0.826345
PARP4	0.149162	-0.0507506	0.217	0.322	1	PARP4	0.826341
CAST	0.149381	-0.115837	0.598	0.65	1	CAST	0.825704
GSKIP	0.149519	-0.087535	0.12	0.196	1	GSKIP	0.825303
ADPRM	0.149562	-0.149669	0.098	0.161	1	ADPRM	0.825178
MZT1	0.149863	0.0770752	0.348	0.238	1	MZT1	0.824306
MRPL54	0.150254	0.166539	0.543	0.448	1	MRPL54	0.823174
ILF2	0.150274	0.108064	0.598	0.476	1	ILF2	0.823115
GIMAP6	0.150307	0.0898222	0.435	0.35	1	GIMAP6	0.823021
AC004951.1	0.150321	0.0851523	0.207	0.133	1	AC004951.1	0.822982
STARD3	0.150379	0.087311	0.293	0.203	1	STARD3	0.822812
BPTF	0.15041	-0.175619	0.641	0.685	1	BPTF	0.822725
BSDC1	0.150558	-0.136859	0.239	0.322	1	BSDC1	0.822296
SMIM37	0.150724	-0.100551	0.163	0.238	1	SMIM37	0.821818
XBP1	0.150869	0.138403	0.337	0.238	1	XBP1	0.8214
RANBP9	0.151175	-0.13604	0.174	0.245	1	RANBP9	0.82052
RSF1	0.151575	-0.0793304	0.457	0.58	1	RSF1	0.819373
SLC16A1-AS1	0.15163	0.146744	0.207	0.133	1	SLC16A1-AS1	0.819216
DIDO1	0.151797	-0.157925	0.25	0.329	1	DIDO1	0.818738
CRNKL1	0.1518	0.0298086	0.196	0.119	1	CRNKL1	0.818729
STARD7	0.15189	0.10807	0.272	0.189	1	STARD7	0.818471
ADK	0.152486	-0.130866	0.13	0.196	1	ADK	0.81677
AC087741.1	0.152615	0.0874216	0.109	0.056	1	AC087741.1	0.816404
NPEPL1	0.152615	0.049086	0.109	0.056	1	NPEPL1	0.816404
PPARG	0.152709	-0.102089	0.109	0.175	1	PPARG	0.816136
SENP1	0.153004	0.109154	0.141	0.084	1	SENP1	0.815298
FKBP4	0.153077	-0.103423	0.098	0.168	1	FKBP4	0.81509
DALRD3	0.153141	0.133465	0.261	0.182	1	DALRD3	0.814908
SUMF2	0.153173	0.130656	0.435	0.343	1	SUMF2	0.814819
NUP54	0.1532	0.124369	0.217	0.147	1	NUP54	0.814742
TMEM161B	0.153495	-0.0806406	0.076	0.14	1	TMEM161B	0.813904
HAT1	0.153497	0.0675516	0.261	0.175	1	HAT1	0.813901
MTUS1	0.153841	0.0657336	0.109	0.056	1	MTUS1	0.812927
RAB5B	0.153903	-0.117445	0.185	0.259	1	RAB5B	0.812753
RTP4	0.154008	0.11787	0.152	0.091	1	RTP4	0.812458
BEX4	0.154215	0.0934476	0.217	0.14	1	BEX4	0.811873
DPY30	0.154248	0.102225	0.511	0.406	1	DPY30	0.811779
SGMS1	0.15439	-0.132322	0.065	0.119	1	SGMS1	0.811379
FEM1A	0.154495	0.0414841	0.12	0.063	1	FEM1A	0.811086
AGK	0.154602	-0.0770273	0.065	0.126	1	AGK	0.810785
ZDHHC18	0.154697	-0.0926228	0.163	0.238	1	ZDHHC18	0.810518
NSA2	0.154978	0.129259	0.641	0.552	1	NSA2	0.809729
CDK11B	0.155008	-0.168467	0.174	0.252	1	CDK11B	0.809647
TOB2	0.155162	-0.095612	0.12	0.189	1	TOB2	0.809213
PHKB	0.155269	-0.0994176	0.196	0.287	1	PHKB	0.808916
ANKRD17	0.155558	0.110657	0.337	0.245	1	ANKRD17	0.808108
GPAA1	0.15582	0.0647474	0.261	0.168	1	GPAA1	0.807376
IP6K2	0.155834	-0.186269	0.228	0.301	1	IP6K2	0.807339
AP3S2	0.156192	0.0400275	0.13	0.07	1	AP3S2	0.806342
ABI1	0.156351	0.119356	0.402	0.315	1	ABI1	0.805901
ATP6V1B2	0.156471	0.0833711	0.228	0.154	1	ATP6V1B2	0.805568
FGD3	0.156478	-0.155132	0.293	0.378	1	FGD3	0.805547
DCBLD1	0.156609	0.12808	0.13	0.077	1	DCBLD1	0.805182
NOP53	0.156646	-0.125531	0.913	0.874	1	NOP53	0.805081
SURF1	0.156687	0.142549	0.435	0.371	1	SURF1	0.804966
BISPR	0.156836	-0.0440805	0.12	0.203	1	BISPR	0.804553
PIP5K1A	0.156911	0.0913935	0.185	0.119	1	PIP5K1A	0.804348
PTPN6	0.15724	0.122574	0.293	0.21	1	PTPN6	0.803437
AC008124.1	0.157272	0.102716	0.141	0.084	1	AC008124.1	0.803349
COPS6	0.157312	0.0525904	0.609	0.49	1	COPS6	0.803237
WDR45	0.157316	-0.117071	0.109	0.175	1	WDR45	0.803228
PSMD2	0.157552	0.102255	0.489	0.399	1	PSMD2	0.802576
PDIK1L	0.157567	0.0511002	0.109	0.056	1	PDIK1L	0.802536
TRIM33	0.157788	0.135133	0.359	0.273	1	TRIM33	0.801927
HERC3	0.158054	-0.100873	0.054	0.105	1	HERC3	0.801194
COMMD3	0.158089	0.0904654	0.457	0.343	1	COMMD3	0.801098
PTPN7	0.158292	0.0785829	0.772	0.748	1	PTPN7	0.800542
TMEM131	0.158295	0.0673655	0.163	0.098	1	TMEM131	0.800534
SAE1	0.158466	0.0846664	0.337	0.245	1	SAE1	0.800064
ANXA6	0.15854	0.127529	0.543	0.476	1	ANXA6	0.799862
ENOPH1	0.158757	0.0727514	0.207	0.133	1	ENOPH1	0.799266
ASNSD1	0.158763	0.124857	0.283	0.21	1	ASNSD1	0.799251
RAP1GDS1	0.158801	0.0426331	0.283	0.189	1	RAP1GDS1	0.799148
ZBTB33	0.158823	0.0577596	0.109	0.056	1	ZBTB33	0.799086
SPINT2	0.158823	0.0498839	0.109	0.056	1	SPINT2	0.799086
ZNF576	0.158881	0.139452	0.163	0.105	1	ZNF576	0.798927
CNST	0.158975	-0.0660211	0.152	0.231	1	CNST	0.79867
TUBGCP2	0.159362	-0.183647	0.25	0.322	1	TUBGCP2	0.797617
CEP44	0.159439	0.0881193	0.141	0.084	1	CEP44	0.797405
PEBP1	0.159474	0.0822488	0.924	0.853	1	PEBP1	0.797311
MLEC	0.159489	-0.123638	0.37	0.455	1	MLEC	0.797269
PPFIA1	0.159492	-0.140375	0.13	0.196	1	PPFIA1	0.797262
ELOVL1	0.159666	-0.0908992	0.12	0.189	1	ELOVL1	0.796788
POLG	0.159754	0.0743235	0.185	0.119	1	POLG	0.796547
CITED2	0.159776	-0.11212	0.174	0.252	1	CITED2	0.79649
TADA2B	0.159822	-0.0989667	0.087	0.147	1	TADA2B	0.796362
MRPL2	0.159901	0.118957	0.261	0.189	1	MRPL2	0.796149
ATP6V0B	0.159946	0.140764	0.565	0.497	1	ATP6V0B	0.796027
CLIC3	0.160093	-0.0790775	0.065	0.126	1	CLIC3	0.795627
IKBKG	0.160158	0.107596	0.217	0.147	1	IKBKG	0.795451
S100A4	0.160283	-0.10074	0.88	0.937	1	S100A4	0.795113
LAPTM4A	0.160362	0.158981	0.467	0.406	1	LAPTM4A	0.794897
RASGRP2	0.160897	0.118988	0.163	0.105	1	RASGRP2	0.793453
RBM45	0.16112	-0.102615	0.065	0.119	1	RBM45	0.792851
MRPL12	0.161222	0.102683	0.304	0.224	1	MRPL12	0.792577
MCF2L2	0.161314	0.0916991	0.152	0.091	1	MCF2L2	0.792327
SRA1	0.16136	-0.119584	0.25	0.343	1	SRA1	0.792203
MAVS	0.161495	0.0689104	0.207	0.133	1	MAVS	0.791842
NUP93	0.161675	0.0316036	0.12	0.063	1	NUP93	0.791356
SRPRA	0.161752	0.0586581	0.457	0.343	1	SRPRA	0.791151
CCDC85B	0.162079	-0.0995753	0.554	0.643	1	CCDC85B	0.790272
RGS2	0.162181	-0.12172	0.13	0.196	1	RGS2	0.790001
IMPAD1	0.162263	-0.0963623	0.065	0.119	1	IMPAD1	0.789781
SUPT4H1	0.162317	0.0945526	0.489	0.392	1	SUPT4H1	0.789635
TM7SF3	0.162391	0.14772	0.196	0.133	1	TM7SF3	0.789438
TADA2A	0.162896	-0.118365	0.054	0.105	1	TADA2A	0.788089
CCDC22	0.16354	-0.0883007	0.098	0.161	1	CCDC22	0.786375
AC093010.2	0.163606	0.0758449	0.185	0.119	1	AC093010.2	0.7862
AL359220.1	0.163651	0.107052	0.239	0.161	1	AL359220.1	0.786082
FOXK2	0.163794	-0.136112	0.12	0.182	1	FOXK2	0.785701
ANXA1	0.16382	-0.216812	0.326	0.413	1	ANXA1	0.785633
DDX55	0.163956	0.116022	0.163	0.105	1	DDX55	0.785274
PPA1	0.164216	0.092721	0.435	0.517	1	PPA1	0.784585
TRIM59	0.164272	-0.142112	0.141	0.203	1	TRIM59	0.784436
NEPRO	0.164458	0.0733346	0.25	0.168	1	NEPRO	0.783944
ZBTB14	0.164539	0.141719	0.174	0.112	1	ZBTB14	0.78373
EPS15L1	0.164567	-0.133673	0.065	0.119	1	EPS15L1	0.783658
CSAD	0.16458	0.0925996	0.185	0.119	1	CSAD	0.783622
ZNF277	0.164635	-0.0606585	0.12	0.196	1	ZNF277	0.783478
ZNF785	0.164957	0.0881682	0.141	0.084	1	ZNF785	0.78263
NAGK	0.165111	0.109022	0.38	0.301	1	NAGK	0.782224
CD53	0.165132	0.1021	0.707	0.65	1	CD53	0.782168
GLUD1	0.165477	-0.210346	0.185	0.245	1	GLUD1	0.781262
OPTN	0.165514	-0.128914	0.598	0.664	1	OPTN	0.781165
FARSA	0.165559	0.107911	0.185	0.119	1	FARSA	0.781048
SEC61B	0.165952	0.135644	0.87	0.783	1	SEC61B	0.780017
DNAJC16	0.166068	0.0820817	0.196	0.126	1	DNAJC16	0.779714
RNFT1	0.166278	0.0326633	0.217	0.14	1	RNFT1	0.779166
EEF1B2	0.166349	-0.120094	0.978	0.993	1	EEF1B2	0.77898
MRPS7	0.166649	-0.113151	0.348	0.448	1	MRPS7	0.778197
DOCK2	0.166696	0.0881055	0.446	0.364	1	DOCK2	0.778075
TAP2	0.166955	0.0991736	0.228	0.154	1	TAP2	0.777401
DHRS4L2	0.167029	0.0576	0.196	0.126	1	DHRS4L2	0.777207
CAMK2D	0.167203	0.0795399	0.141	0.084	1	CAMK2D	0.776755
HIST1H2AC	0.167581	-0.144356	0.12	0.182	1	HIST1H2AC	0.775775
SIRT6	0.167821	-0.0990219	0.109	0.175	1	SIRT6	0.775154
TNPO1	0.167844	0.106365	0.304	0.224	1	TNPO1	0.775094
AP003774.4	0.168069	-0.12481	0.065	0.119	1	AP003774.4	0.774513
ASXL2	0.168712	0.0626808	0.283	0.203	1	ASXL2	0.772854
RAB37	0.168753	-0.0945313	0.141	0.21	1	RAB37	0.772749
NSF	0.168909	-0.174552	0.152	0.217	1	NSF	0.772348
C1orf56	0.168992	0.0712499	0.326	0.231	1	C1orf56	0.772133
RAD51C	0.169122	0.0928266	0.283	0.203	1	RAD51C	0.771799
TARS	0.169195	-0.124143	0.207	0.294	1	TARS	0.771613
RPS6KB1	0.169293	0.159759	0.207	0.14	1	RPS6KB1	0.771361
RCSD1	0.169354	0.0832927	0.446	0.329	1	RCSD1	0.771204
MED19	0.169382	-0.0619305	0.174	0.259	1	MED19	0.771132
ST8SIA4	0.169626	0.194478	0.293	0.224	1	ST8SIA4	0.770507
C4orf3	0.169674	0.086054	0.815	0.748	1	C4orf3	0.770384
VDAC3	0.169878	-0.142075	0.37	0.441	1	VDAC3	0.769864
RAB35	0.16992	-0.101877	0.12	0.189	1	RAB35	0.769755
HSF1	0.169976	0.113926	0.239	0.168	1	HSF1	0.769612
MAGEF1	0.170294	-0.120257	0.087	0.147	1	MAGEF1	0.7688
CMC1	0.170317	0.0884168	0.38	0.28	1	CMC1	0.768741
MBTD1	0.170368	-0.105338	0.054	0.105	1	MBTD1	0.768612
ZDHHC21	0.170453	-0.118431	0.13	0.196	1	ZDHHC21	0.768396
ATF6B	0.170579	-0.14809	0.38	0.455	1	ATF6B	0.768075
ATP2B1	0.170654	-0.246422	0.304	0.364	1	ATP2B1	0.767884
RASSF3	0.171369	-0.0985007	0.087	0.147	1	RASSF3	0.766067
FHL1	0.171766	0.0582549	0.141	0.084	1	FHL1	0.765063
ATP6V1A	0.171769	-0.0988722	0.109	0.175	1	ATP6V1A	0.765056
KPNA1	0.171837	-0.117453	0.12	0.189	1	KPNA1	0.764884
PIH1D1	0.171889	0.120018	0.391	0.301	1	PIH1D1	0.764751
TCP1	0.17213	0.0937567	0.467	0.371	1	TCP1	0.764143
TMEM222	0.172333	0.0641036	0.217	0.14	1	TMEM222	0.763631
LSM2	0.172372	0.096916	0.522	0.42	1	LSM2	0.763533
ZNF720	0.172407	0.127623	0.261	0.189	1	ZNF720	0.763445
SIN3B	0.172413	0.14284	0.152	0.098	1	SIN3B	0.76343
PMPCA	0.172456	0.114139	0.217	0.154	1	PMPCA	0.763321
TUBA4A	0.17255	0.178676	0.62	0.566	1	TUBA4A	0.763085
ABR	0.172586	-0.137204	0.098	0.154	1	ABR	0.762994
ANKRD36	0.172726	-0.109028	0.152	0.231	1	ANKRD36	0.762643
NCF4	0.172742	-0.112251	0.283	0.364	1	NCF4	0.762601
C19orf66	0.172924	0.144274	0.37	0.287	1	C19orf66	0.762144
PLCG2	0.172937	0.131991	0.141	0.091	1	PLCG2	0.762112
POLR2E	0.173586	-0.167256	0.326	0.413	1	POLR2E	0.760485
DDI2	0.173845	-0.0994461	0.13	0.203	1	DDI2	0.759837
MRPS11	0.174015	0.0985194	0.37	0.294	1	MRPS11	0.759413
NSD3	0.174019	-0.119283	0.609	0.664	1	NSD3	0.759402
TBC1D10A	0.174029	0.0844328	0.13	0.077	1	TBC1D10A	0.759378
RNF213	0.174055	0.0988588	0.924	0.874	1	RNF213	0.759314
NPHP3	0.174064	-0.141517	0.163	0.231	1	NPHP3	0.759292
GPBP1	0.174124	-0.138965	0.696	0.713	1	GPBP1	0.759141
RGCC	0.17422	0.225499	0.446	0.385	1	RGCC	0.758902
PDCD10	0.174286	-0.147173	0.467	0.552	1	PDCD10	0.758737
CDC26	0.174553	-0.101953	0.435	0.524	1	CDC26	0.758073
LSM3	0.174556	0.110581	0.554	0.49	1	LSM3	0.758065
TRAC	0.174626	-0.0955492	1	1	1	TRAC	0.757892
PTPN2	0.174968	0.101276	0.424	0.357	1	PTPN2	0.757041
CHP1	0.17528	0.110941	0.185	0.126	1	CHP1	0.756268
ATF4	0.175398	0.0859694	0.457	0.357	1	ATF4	0.755976
FN3KRP	0.175583	0.105748	0.185	0.119	1	FN3KRP	0.755519
TMEM80	0.175871	0.0690831	0.196	0.126	1	TMEM80	0.754807
MPC2	0.175958	0.0601383	0.554	0.469	1	MPC2	0.754591
YTHDC2	0.176134	-0.104499	0.207	0.28	1	YTHDC2	0.754156
CYBA	0.176191	0.0872986	0.978	0.993	1	CYBA	0.754016
DPP3	0.176269	0.0541831	0.163	0.098	1	DPP3	0.753824
ZMYND8	0.176341	-0.154907	0.12	0.182	1	ZMYND8	0.753647
AC074032.1	0.176377	-0.113346	0.076	0.133	1	AC074032.1	0.753559
MT-ND6	0.17645	-0.11579	0.576	0.643	1	MT-ND6	0.753378
THEM4	0.17647	0.104014	0.272	0.189	1	THEM4	0.75333
RIC8A	0.17647	0.0690941	0.272	0.189	1	RIC8A	0.75333
RHBDF2	0.176709	0.0445321	0.152	0.091	1	RHBDF2	0.752741
CCDC136	0.176745	0.116058	0.12	0.07	1	CCDC136	0.752654
GRAP	0.176801	-0.0916785	0.109	0.175	1	GRAP	0.752516
R3HDM2	0.177099	0.0592352	0.37	0.28	1	R3HDM2	0.751783
MRPS18C	0.177144	-0.151054	0.391	0.448	1	MRPS18C	0.751672
MKKS	0.17768	0.0840675	0.13	0.077	1	MKKS	0.75036
DDT	0.177691	0.0917123	0.609	0.497	1	DDT	0.750335
PNPLA8	0.177724	0.064149	0.315	0.231	1	PNPLA8	0.750254
ZCCHC8	0.17782	-0.111765	0.109	0.175	1	ZCCHC8	0.750019
ATP6V1E1	0.177845	-0.109595	0.272	0.35	1	ATP6V1E1	0.749959
DCAF10	0.177925	0.114679	0.207	0.14	1	DCAF10	0.749763
UBE2J2	0.178123	-0.122373	0.261	0.329	1	UBE2J2	0.74928
DUSP16	0.178206	0.0574215	0.304	0.217	1	DUSP16	0.749078
EP300	0.178358	0.0648271	0.413	0.308	1	EP300	0.748708
DOCK9	0.17891	0.0777928	0.13	0.077	1	DOCK9	0.747365
ELAC1	0.17891	-0.106957	0.065	0.119	1	ELAC1	0.747365
NOB1	0.179213	0.125496	0.272	0.203	1	NOB1	0.74663
PLCG1	0.179304	0.0985798	0.12	0.07	1	PLCG1	0.746409
ZNF260	0.179304	0.0932389	0.12	0.07	1	ZNF260	0.746409
SSRP1	0.179362	-0.112949	0.217	0.294	1	SSRP1	0.746271
NSUN2	0.179664	0.053542	0.207	0.133	1	NSUN2	0.745539
SMNDC1	0.179876	0.0313663	0.304	0.217	1	SMNDC1	0.745026
MAP1LC3A	0.180318	-0.135148	0.141	0.21	1	MAP1LC3A	0.743961
PDE4DIP	0.180392	0.068817	0.337	0.245	1	PDE4DIP	0.743784
E2F6	0.180726	-0.0903837	0.054	0.105	1	E2F6	0.742981
TM2D3	0.181018	-0.137551	0.217	0.301	1	TM2D3	0.742278
MTO1	0.18181	0.0926041	0.185	0.119	1	MTO1	0.740381
TMEM205	0.181969	-0.109785	0.13	0.196	1	TMEM205	0.740003
BNIP2	0.182301	0.0773728	0.38	0.294	1	BNIP2	0.739211
FBXW5	0.182306	-0.117172	0.478	0.538	1	FBXW5	0.739199
ATP2C1	0.182983	-0.0987153	0.109	0.175	1	ATP2C1	0.737588
GPALPP1	0.183147	-0.105928	0.152	0.224	1	GPALPP1	0.7372
ZBED5	0.183392	-0.101935	0.163	0.238	1	ZBED5	0.736619
MAD2L1	0.183632	0.0504556	0.152	0.091	1	MAD2L1	0.736052
PHYKPL	0.183738	0.0585622	0.478	0.378	1	PHYKPL	0.735802
LINC01588	0.183892	0.0908463	0.13	0.077	1	LINC01588	0.735437
ARPC1A	0.184237	0.112477	0.337	0.266	1	ARPC1A	0.734623
COX7A2	0.184254	0.0944158	0.815	0.748	1	COX7A2	0.734584
KMT2C	0.184353	0.155168	0.359	0.301	1	KMT2C	0.73435
VPS26C	0.18441	-0.105696	0.12	0.182	1	VPS26C	0.734216
PAK2	0.18444	0.0815136	0.75	0.678	1	PAK2	0.734146
GPR171	0.184797	-0.198807	0.576	0.629	1	GPR171	0.733304
ZNF500	0.185154	0.0652961	0.13	0.077	1	ZNF500	0.732468
RABL2B	0.185197	-0.0828651	0.076	0.133	1	RABL2B	0.732365
COMMD5	0.185341	0.0844159	0.272	0.196	1	COMMD5	0.732029
YIPF4	0.185407	-0.184599	0.413	0.462	1	YIPF4	0.731875
METTL13	0.185561	-0.0998386	0.098	0.154	1	METTL13	0.731513
UBL4A	0.185631	-0.124614	0.174	0.245	1	UBL4A	0.73135
CAPN15	0.185984	0.0492354	0.152	0.091	1	CAPN15	0.730525
PRRC2C	0.186128	0.0861212	0.902	0.874	1	PRRC2C	0.730189
RPS15A	0.186134	0.0497882	1	1	1	RPS15A	0.730174
DENND4A	0.186421	0.054884	0.13	0.077	1	DENND4A	0.729504
HEBP2	0.186504	-0.143942	0.315	0.392	1	HEBP2	0.729311
TUBA1C	0.186604	0.113665	0.25	0.182	1	TUBA1C	0.729079
BTBD10	0.186954	-0.0320429	0.087	0.147	1	BTBD10	0.728265
FAM215B	0.187145	-0.157148	0.12	0.175	1	FAM215B	0.727823
KCNK5	0.187148	0.114203	0.12	0.07	1	KCNK5	0.727814
TSPAN14	0.187224	0.141215	0.478	0.413	1	TSPAN14	0.727637
MKRN2	0.187237	0.0574178	0.141	0.084	1	MKRN2	0.727607
ASB8	0.187751	-0.155694	0.174	0.238	1	ASB8	0.726419
BATF	0.188112	0.117413	0.652	0.559	1	BATF	0.725584
KCNN4	0.18831	0.0573978	0.239	0.161	1	KCNN4	0.725126
SMIM30	0.188318	0.0932138	0.152	0.098	1	SMIM30	0.725109
LDHB	0.188389	0.103112	0.978	0.916	1	LDHB	0.724945
DUT	0.188389	-0.149953	0.37	0.441	1	DUT	0.724944
SNAP23	0.188476	-0.172569	0.261	0.329	1	SNAP23	0.724744
[truncated: 4,663 more rows]

## Sheet: S3E-PD1+ PD-L1 vs. Bispecific
Table S3E: Differential Analysis of CD4+PD1+FOXP3- T cells PD-L1 vs. Bispecific
[truncated: 6,190 more rows]

[truncated: 5 more sheets: S3F-PD1- IgG vs. PD-1, S3G-PD1- IgG vs. PD-L1, S3H-PD1- IgG vs. Bispecific, S3I-PD1- PD-1 vs. Bispecific, S3J-PD1- PD-L1 vs. Bispecific]
