# Supplementary material for: Enhanced Efficacy of Simultaneous PD-1 and PD-L1 Immune Checkpoint Blockade in High-Grade Serous Ovarian Cancer
Source: Oxford University Press journal article supplement (doi:10.1158/0008-5472.can-20-1674), 2020-11-06
Supplement: 00085472can201674-sup-243610_2_supp_6692633_qj3dck.xlsx [file 00085472can201674-sup-243610_2_supp_6692633_qj3dck.xlsx]

## Sheet: S4A PD-1 vs IgG
Table S4A: NK Cell Differential Expression anti-PD-1 vs. IgG
	p_val	avg_logFC	pct.1	pct.2	p_val_adj	Gene_ID
GZMB	7.1808e-05	0.704691	0.636	0.43	1	GZMB
LDHA	9.62281e-05	0.367185	0.839	0.658	1	LDHA
IDH2	0.000160862	0.421981	0.475	0.246	1	IDH2
ADAR	0.000173668	0.405539	0.508	0.298	1	ADAR
ZNF414	0.000431379	-0.280802	0.017	0.14	1	ZNF414
AGTRAP	0.000487945	0.328192	0.22	0.061	1	AGTRAP
IFNGR1	0.000593225	0.267294	0.322	0.123	1	IFNGR1
C1QBP	0.000649167	0.263837	0.585	0.368	1	C1QBP
FAM208B	0.000745002	0.291735	0.237	0.079	1	FAM208B
LYSMD3	0.00078555	0.184696	0.119	0.009	1	LYSMD3
UAP1	0.00078555	0.164314	0.119	0.009	1	UAP1
SNRPE	0.000893806	0.34598	0.534	0.316	1	SNRPE
SURF4	0.000987231	0.303422	0.424	0.228	1	SURF4
TPGS2	0.00102516	0.300792	0.297	0.123	1	TPGS2
BCL7B	0.00105315	0.247369	0.28	0.105	1	BCL7B
RBM39	0.00118201	-0.336576	0.703	0.798	1	RBM39
C20orf27	0.00126462	0.170473	0.11	0.009	1	C20orf27
LINC01184	0.00130713	0.206211	0.11	0.009	1	LINC01184
GLIPR2	0.00138733	0.230602	0.644	0.404	1	GLIPR2
MX1	0.00164526	0.260746	0.288	0.114	1	MX1
MRPL18	0.00164626	0.270501	0.441	0.237	1	MRPL18
WIPF1	0.00164938	0.287266	0.763	0.561	1	WIPF1
EIF2AK2	0.00165728	0.248419	0.424	0.219	1	EIF2AK2
GNAI2	0.00166249	-0.262888	0.678	0.798	1	GNAI2
TAP1	0.00170473	0.328245	0.525	0.325	1	TAP1
GNLY	0.00174472	0.35832	0.932	0.904	1	GNLY
DALRD3	0.0019559	0.245289	0.186	0.053	1	DALRD3
LSM12	0.00197216	0.273973	0.28	0.114	1	LSM12
BORCS5	0.00202546	0.214427	0.186	0.053	1	BORCS5
MORF4L2	0.00218453	0.28378	0.347	0.175	1	MORF4L2
CEP120	0.00262164	0.201206	0.119	0.018	1	CEP120
STAG3	0.00264826	0.200738	0.136	0.026	1	STAG3
ATP13A1	0.00265218	-0.266868	0.042	0.158	1	ATP13A1
PSME2	0.00274323	0.260826	0.881	0.693	1	PSME2
TMA7	0.00277103	-0.244137	0.831	0.912	1	TMA7
MTF1	0.00286175	0.168087	0.119	0.018	1	MTF1
PPIL4	0.00295735	0.321941	0.271	0.123	1	PPIL4
NFAT5	0.00306339	-0.304555	0.161	0.325	1	NFAT5
MRPL13	0.00306727	0.241132	0.39	0.202	1	MRPL13
BORCS7	0.00310414	0.281064	0.288	0.132	1	BORCS7
ATP6V0E2	0.00339066	0.32765	0.22	0.088	1	ATP6V0E2
CALR	0.00345404	0.264831	0.788	0.57	1	CALR
KLRB1	0.00358712	-0.362746	0.788	0.851	1	KLRB1
PPP2CB	0.00385706	0.227456	0.11	0.018	1	PPP2CB
GTPBP1	0.00396362	0.176144	0.127	0.026	1	GTPBP1
PSMD8	0.0040353	0.274328	0.678	0.535	1	PSMD8
NUP210	0.00406145	0.202716	0.271	0.114	1	NUP210
FGFBP2	0.00411456	-0.630785	0.025	0.123	1	FGFBP2
ASB6	0.00414815	0.168333	0.11	0.018	1	ASB6
RAB8B	0.00417296	-0.366659	0.246	0.395	1	RAB8B
CDK12	0.00419569	0.309413	0.331	0.175	1	CDK12
UIMC1	0.00475261	0.214758	0.186	0.061	1	UIMC1
POLR2F	0.00494358	0.296751	0.441	0.254	1	POLR2F
CYB5A	0.00498303	0.195186	0.254	0.105	1	CYB5A
FAM50A	0.00499751	0.262219	0.475	0.298	1	FAM50A
FLAD1	0.00502404	0.187727	0.203	0.07	1	FLAD1
TEFM	0.00517387	0.315433	0.237	0.105	1	TEFM
AC097376.2	0.00521783	0.326594	0.22	0.088	1	AC097376.2
KPNB1	0.00524062	0.266939	0.466	0.281	1	KPNB1
NME6	0.00529479	0.191871	0.169	0.053	1	NME6
HSPA14.1	0.00537133	0.266097	0.178	0.061	1	HSPA14.1
MAML1	0.00546269	-0.297738	0.051	0.158	1	MAML1
SPTY2D1	0.00548424	0.188138	0.237	0.096	1	SPTY2D1
STMN3	0.00558034	0.195641	0.153	0.044	1	STMN3
NUDT9	0.00565389	-0.248853	0.034	0.132	1	NUDT9
IMP4	0.00565405	0.237996	0.254	0.114	1	IMP4
ZNF544	0.0060495	-0.252472	0.051	0.158	1	ZNF544
GOLGA8B	0.00622968	-0.298992	0.119	0.254	1	GOLGA8B
TFDP1	0.00634085	0.19411	0.229	0.096	1	TFDP1
RPL12	0.00645548	0.167026	0.992	0.974	1	RPL12
SAYSD1	0.00648058	0.20452	0.153	0.044	1	SAYSD1
TMEM123	0.00674045	0.271571	0.407	0.254	1	TMEM123
MCM6	0.00677316	0.205755	0.178	0.061	1	MCM6
AIDA	0.00690817	0.230291	0.203	0.079	1	AIDA
CD8A	0.00692073	0.257426	0.212	0.079	1	CD8A
PGRMC1	0.00694636	0.285436	0.195	0.079	1	PGRMC1
RNASEH2C	0.00708286	0.205721	0.653	0.43	1	RNASEH2C
LDB1	0.00710944	0.17697	0.119	0.026	1	LDB1
SMIM37	0.00730603	0.213525	0.297	0.14	1	SMIM37
LEMD2	0.00733928	0.188838	0.102	0.018	1	LEMD2
POU2F2	0.00739111	-0.327208	0.085	0.202	1	POU2F2
C3orf58	0.00744392	0.150395	0.102	0.018	1	C3orf58
ZNF622	0.00762083	-0.25568	0.136	0.272	1	ZNF622
SNTB1	0.00765724	0.186602	0.102	0.018	1	SNTB1
REXO4	0.00765854	0.272831	0.195	0.079	1	REXO4
HIF1A	0.00777887	0.204535	0.415	0.246	1	HIF1A
GPSM2	0.00787601	0.123621	0.102	0.018	1	GPSM2
LY6E	0.00792321	0.406639	0.712	0.605	1	LY6E
MRPL43	0.00799615	0.238727	0.381	0.211	1	MRPL43
APOBEC3H	0.00852766	-0.23295	0.161	0.307	1	APOBEC3H
AP2A2	0.00862381	-0.16653	0.051	0.158	1	AP2A2
SEC24C	0.00871436	0.207981	0.169	0.061	1	SEC24C
H3F3A	0.00871746	-0.137488	0.975	0.982	1	H3F3A
CCDC97	0.00888979	0.208738	0.22	0.088	1	CCDC97
MRPL35	0.00890564	-0.224078	0.076	0.193	1	MRPL35
ABHD5	0.00890577	0.139964	0.161	0.053	1	ABHD5
MVP	0.00893099	0.178596	0.424	0.254	1	MVP
C22orf39	0.00910691	0.21535	0.22	0.096	1	C22orf39
FOXP1	0.00946554	-0.2884	0.314	0.456	1	FOXP1
KYAT3	0.00957758	0.217556	0.144	0.044	1	KYAT3
APRT	0.00975229	0.182693	0.831	0.667	1	APRT
EBLN3P	0.0102327	0.229481	0.237	0.114	1	EBLN3P
USP15	0.0102875	0.262781	0.542	0.377	1	USP15
P2RY11	0.0105809	-0.219153	0.034	0.123	1	P2RY11
GRPEL1	0.0106767	0.155474	0.212	0.088	1	GRPEL1
ELOC	0.0107159	0.175751	0.483	0.307	1	ELOC
SSR3	0.0107451	0.187924	0.475	0.298	1	SSR3
SLC39A3	0.0108967	0.196039	0.195	0.079	1	SLC39A3
KPNA6	0.0109808	0.147761	0.237	0.105	1	KPNA6
CHMP7	0.011083	-0.240945	0.068	0.175	1	CHMP7
H3F3B	0.0111546	0.148749	0.992	0.974	1	H3F3B
CCAR1	0.0116717	0.299237	0.339	0.202	1	CCAR1
CSDE1	0.0118277	-0.24409	0.449	0.596	1	CSDE1
PAAF1	0.0118639	-0.173384	0.034	0.123	1	PAAF1
NAXE	0.0118979	0.187728	0.288	0.149	1	NAXE
PDP2	0.0119956	0.212772	0.11	0.026	1	PDP2
SPATA20	0.0119956	0.178664	0.11	0.026	1	SPATA20
POLE4	0.0121433	0.174383	0.297	0.158	1	POLE4
GBP5	0.0122107	0.282823	0.492	0.333	1	GBP5
DECR1	0.012337	0.218826	0.373	0.211	1	DECR1
TOP1	0.0123516	-0.288474	0.407	0.553	1	TOP1
SUDS3	0.0124694	-0.215012	0.068	0.175	1	SUDS3
ISG20	0.0124708	0.334591	0.517	0.368	1	ISG20
DCAF11	0.0125143	0.268117	0.271	0.14	1	DCAF11
HSPA13	0.0126151	0.175045	0.11	0.026	1	HSPA13
GMCL1	0.0127721	0.179757	0.271	0.132	1	GMCL1
TNRC6C	0.0128202	-0.259469	0.136	0.263	1	TNRC6C
CHD1L	0.0130177	0.153438	0.127	0.035	1	CHD1L
TERF1	0.0130458	0.261199	0.237	0.114	1	TERF1
SEC22B	0.0132003	-0.312497	0.246	0.368	1	SEC22B
NME1	0.0133758	0.224006	0.254	0.132	1	NME1
SPRYD3	0.0134291	0.139688	0.11	0.026	1	SPRYD3
RLIM	0.0136087	0.173324	0.153	0.053	1	RLIM
POP7	0.0136165	0.193492	0.254	0.123	1	POP7
BLM	0.0137783	0.203877	0.136	0.044	1	BLM
TSC22D1	0.0138386	-0.259998	0.068	0.167	1	TSC22D1
UQCC2	0.0140901	0.207199	0.356	0.202	1	UQCC2
AKAP9	0.0143742	-0.320017	0.483	0.632	1	AKAP9
ARPP19	0.0144273	0.17943	0.373	0.219	1	ARPP19
IFITM2	0.0147008	0.172879	0.932	0.904	1	IFITM2
GPR68	0.0149	-0.173812	0.11	0.237	1	GPR68
TOR1AIP1	0.0151149	0.185981	0.305	0.158	1	TOR1AIP1
GALNT2	0.015178	-0.11458	0.051	0.149	1	GALNT2
DDX28	0.0152366	0.122073	0.153	0.053	1	DDX28
GZMH	0.0152881	0.23549	0.203	0.088	1	GZMH
TXNL4A	0.0153079	0.177301	0.458	0.289	1	TXNL4A
B3GAT3	0.0154097	0.250859	0.373	0.228	1	B3GAT3
CEMIP2	0.0154539	-0.370542	0.195	0.307	1	CEMIP2
DYNLRB1	0.0155441	0.255124	0.653	0.5	1	DYNLRB1
ARHGEF2	0.0156639	0.149733	0.229	0.105	1	ARHGEF2
RPP30	0.0156947	0.186778	0.203	0.088	1	RPP30
PMS2	0.0158602	0.249831	0.169	0.07	1	PMS2
SERTAD3	0.0160422	0.209957	0.136	0.044	1	SERTAD3
WAS	0.0160568	0.233497	0.441	0.289	1	WAS
TMEM238	0.0161365	0.196812	0.263	0.132	1	TMEM238
CYB5R3	0.0161634	-0.228146	0.068	0.167	1	CYB5R3
HDHD5	0.0165679	0.142765	0.136	0.044	1	HDHD5
NBEAL2	0.0167258	0.196157	0.212	0.096	1	NBEAL2
ACTR3	0.0169003	0.197316	0.797	0.649	1	ACTR3
DENR	0.01691	0.224321	0.297	0.167	1	DENR
BCDIN3D	0.0170465	0.150357	0.178	0.07	1	BCDIN3D
IP6K1	0.0171979	0.192158	0.237	0.114	1	IP6K1
DNAJB1	0.0173385	0.148762	0.161	0.061	1	DNAJB1
PDXK	0.0173633	0.220128	0.22	0.105	1	PDXK
COMMD10	0.0173648	-0.224418	0.076	0.175	1	COMMD10
RHBDF2	0.0174557	0.171136	0.119	0.035	1	RHBDF2
ERI3	0.0175073	0.169874	0.161	0.061	1	ERI3
CAAP1	0.017797	0.22964	0.22	0.105	1	CAAP1
MRPS18A	0.0179092	0.165284	0.186	0.079	1	MRPS18A
TMSB10	0.0179523	0.161398	0.992	1	1	TMSB10
IRF7	0.0180224	0.225266	0.347	0.202	1	IRF7
EXOSC9	0.0181832	0.204486	0.263	0.14	1	EXOSC9
TIMMDC1	0.0181981	-0.302777	0.161	0.272	1	TIMMDC1
AGL	0.0182868	0.213728	0.195	0.088	1	AGL
EMSY	0.018351	-0.218171	0.076	0.175	1	EMSY
XPO1	0.0184541	0.186345	0.331	0.193	1	XPO1
PTMS	0.0185201	-0.274007	0.076	0.175	1	PTMS
METTL22	0.0188765	0.146068	0.102	0.026	1	METTL22
GABPB2	0.0190169	-0.171885	0.034	0.114	1	GABPB2
KMT5B	0.019269	-0.261175	0.153	0.272	1	KMT5B
WDR13	0.0196077	0.221856	0.144	0.053	1	WDR13
AC006033.2	0.0197599	-0.176466	0.051	0.14	1	AC006033.2
METTL26	0.019887	-0.271475	0.39	0.509	1	METTL26
GNL1	0.0202422	0.231489	0.229	0.114	1	GNL1
COMMD8	0.0204008	0.202248	0.381	0.237	1	COMMD8
SIN3A	0.0204656	0.152231	0.237	0.114	1	SIN3A
GLS	0.0205292	0.208545	0.398	0.246	1	GLS
OTUD6B	0.0205676	0.138178	0.102	0.026	1	OTUD6B
USP14	0.0209342	0.205718	0.347	0.211	1	USP14
ZNF581	0.0210114	-0.169268	0.051	0.14	1	ZNF581
NT5C2	0.0210889	-0.234344	0.059	0.149	1	NT5C2
CLN6	0.0213319	0.161399	0.102	0.026	1	CLN6
BCKDHB	0.0213319	0.135219	0.102	0.026	1	BCKDHB
CRCP	0.0213739	0.127771	0.186	0.079	1	CRCP
PPIH	0.0214106	0.163281	0.254	0.132	1	PPIH
CLN3	0.0214588	0.175109	0.144	0.053	1	CLN3
CHD4	0.0217436	0.252464	0.407	0.254	1	CHD4
RTP4	0.021897	0.207704	0.178	0.079	1	RTP4
ZBED1	0.0221994	0.107807	0.178	0.07	1	ZBED1
BBC3	0.0222675	-0.215217	0.042	0.123	1	BBC3
WDR37	0.0223618	0.0925947	0.119	0.035	1	WDR37
ARID1B	0.0224634	-0.198359	0.381	0.509	1	ARID1B
ATAD1	0.0224846	0.18772	0.178	0.079	1	ATAD1
PDGFD	0.0225366	-0.268013	0.068	0.158	1	PDGFD
WDR1	0.0225646	0.265478	0.441	0.289	1	WDR1
TBC1D7	0.0225796	-0.199207	0.059	0.149	1	TBC1D7
CCDC142	0.0226633	0.173985	0.127	0.044	1	CCDC142
BTBD7	0.0226834	0.221671	0.178	0.079	1	BTBD7
TRAPPC2	0.0227111	0.222533	0.263	0.14	1	TRAPPC2
PMVK	0.0227276	0.1898	0.254	0.132	1	PMVK
GIMAP1	0.0227478	-0.199668	0.585	0.719	1	GIMAP1
VDAC1	0.0228107	0.241523	0.534	0.395	1	VDAC1
POLRMT	0.0231161	0.092279	0.119	0.035	1	POLRMT
JMJD4	0.0231455	0.203841	0.127	0.044	1	JMJD4
SNRNP48	0.0234113	-0.0914267	0.059	0.158	1	SNRNP48
PSMA7	0.0235021	0.146776	0.898	0.789	1	PSMA7
BUD23	0.0237736	0.202028	0.271	0.149	1	BUD23
BICD2	0.0239266	0.073847	0.144	0.053	1	BICD2
MBD5	0.0239439	-0.210246	0.153	0.272	1	MBD5
TRAPPC10	0.0240185	-0.229255	0.254	0.368	1	TRAPPC10
ABHD2	0.0240441	0.175247	0.229	0.114	1	ABHD2
CD63	0.0244956	0.158419	0.983	0.939	1	CD63
ANKRD36C	0.0251163	-0.293756	0.11	0.211	1	ANKRD36C
KMT2A	0.0251277	0.130998	0.542	0.342	1	KMT2A
HCCS	0.025249	0.167388	0.153	0.061	1	HCCS
SMARCB1	0.0254117	0.24051	0.322	0.202	1	SMARCB1
TUBB	0.0254456	0.189723	0.653	0.509	1	TUBB
WDR45	0.0255181	-0.277708	0.11	0.211	1	WDR45
OXR1	0.0255423	-0.265612	0.136	0.237	1	OXR1
LRRC58	0.0255855	-0.168814	0.076	0.175	1	LRRC58
LAMTOR2	0.0256301	0.224214	0.415	0.272	1	LAMTOR2
GIPC1	0.0258711	0.205169	0.237	0.123	1	GIPC1
POLR2I	0.0258801	0.142692	0.305	0.167	1	POLR2I
RCC2	0.0259405	-0.199422	0.076	0.167	1	RCC2
MTHFD1	0.0259513	0.174649	0.136	0.053	1	MTHFD1
CASK	0.026012	-0.193452	0.212	0.342	1	CASK
CAT	0.0261312	0.163118	0.212	0.105	1	CAT
POU2F1	0.0261449	-0.114429	0.042	0.123	1	POU2F1
RNF166	0.0265218	-0.261146	0.271	0.412	1	RNF166
STX4	0.0265678	0.24789	0.364	0.237	1	STX4
TOP2B	0.0265982	-0.271152	0.322	0.439	1	TOP2B
RNF6	0.0267286	0.194998	0.161	0.07	1	RNF6
MTCH2	0.0268387	0.235989	0.28	0.167	1	MTCH2
CNST	0.0269581	0.173815	0.153	0.061	1	CNST
NNT-AS1	0.0269581	0.131968	0.153	0.061	1	NNT-AS1
PFKFB3	0.0270399	0.155406	0.11	0.035	1	PFKFB3
GCHFR	0.0271228	0.214761	0.381	0.228	1	GCHFR
RMC1	0.0273413	0.123707	0.11	0.035	1	RMC1
TSEN34	0.0273954	-0.254422	0.11	0.211	1	TSEN34
VDAC2	0.0274423	0.218055	0.559	0.395	1	VDAC2
FLII	0.0275816	-0.165954	0.153	0.272	1	FLII
METAP1	0.0276456	0.141372	0.11	0.035	1	METAP1
LARP4	0.0276798	0.227377	0.169	0.079	1	LARP4
TP53TG1	0.027686	0.0727502	0.144	0.053	1	TP53TG1
HELZ	0.0279656	-0.255111	0.364	0.474	1	HELZ
SMIM4	0.0281458	-0.129052	0.042	0.123	1	SMIM4
UBE2H	0.0281718	-0.273243	0.102	0.202	1	UBE2H
TM7SF3	0.0281735	0.206096	0.195	0.096	1	TM7SF3
GBP1	0.0282673	0.218516	0.212	0.105	1	GBP1
PCMT1	0.0283636	0.223749	0.424	0.272	1	PCMT1
TXLNA	0.0286571	0.187057	0.169	0.079	1	TXLNA
HSP90AB1	0.0288356	0.15361	0.873	0.754	1	HSP90AB1
TRNT1	0.0288631	-0.240429	0.119	0.219	1	TRNT1
GNAI3	0.028891	0.177634	0.508	0.342	1	GNAI3
LSM14B	0.0292263	-0.222296	0.034	0.105	1	LSM14B
YJU2	0.0293633	0.0690424	0.127	0.044	1	YJU2
ALAD	0.0293717	0.156877	0.11	0.035	1	ALAD
BOLA3	0.0295436	0.132898	0.229	0.114	1	BOLA3
PELP1	0.029555	-0.197165	0.051	0.132	1	PELP1
ANKRD36B	0.0296081	0.0713144	0.144	0.053	1	ANKRD36B
CFL1	0.0297878	0.116928	0.992	0.965	1	CFL1
MECP2	0.0298959	-0.165883	0.22	0.368	1	MECP2
KDM5C	0.0300236	0.183805	0.161	0.07	1	KDM5C
CNPY3	0.0300535	-0.207061	0.203	0.325	1	CNPY3
NHP2	0.030068	0.233136	0.424	0.289	1	NHP2
ATP6V1G1	0.030225	-0.19507	0.78	0.789	1	ATP6V1G1
SLC2A4RG	0.0302934	0.226566	0.195	0.096	1	SLC2A4RG
CDC37	0.0304588	0.168068	0.517	0.36	1	CDC37
JAK3	0.0305489	0.195538	0.347	0.228	1	JAK3
AK6	0.0309033	0.181288	0.22	0.114	1	AK6
TSC22D3	0.0309551	0.153615	0.136	0.053	1	TSC22D3
LAX1	0.0312026	-0.231059	0.076	0.167	1	LAX1
PMPCA	0.0312373	0.139844	0.203	0.096	1	PMPCA
GPCPD1	0.0312559	0.137249	0.136	0.053	1	GPCPD1
DLST	0.0312559	0.136979	0.136	0.053	1	DLST
VRK3	0.0314037	-0.233555	0.102	0.193	1	VRK3
MRPS34	0.0314063	0.213577	0.627	0.491	1	MRPS34
ZNF706	0.0314113	-0.34328	0.407	0.5	1	ZNF706
RRP36	0.0316927	0.207991	0.305	0.184	1	RRP36
POLR2K	0.0317137	0.109193	0.576	0.386	1	POLR2K
RPS9	0.031835	0.0968015	1	1	1	RPS9
THOC7	0.0319062	0.127971	0.458	0.298	1	THOC7
RSL1D1	0.0320673	0.222132	0.5	0.36	1	RSL1D1
PCNX2	0.0321286	-0.204257	0.085	0.175	1	PCNX2
MPI	0.0326894	-0.160918	0.034	0.105	1	MPI
TRIM11	0.0327426	0.120421	0.212	0.105	1	TRIM11
PKN2	0.0327907	0.13838	0.271	0.149	1	PKN2
UBXN11	0.0327976	0.172007	0.136	0.053	1	UBXN11
GBA2	0.032926	0.126404	0.11	0.035	1	GBA2
SIRT7	0.0329662	-0.265531	0.297	0.412	1	SIRT7
MTPAP	0.0331704	-0.211346	0.059	0.14	1	MTPAP
SRSF8	0.0333817	-0.264638	0.331	0.439	1	SRSF8
TMEM38B	0.0336432	0.0781341	0.11	0.035	1	TMEM38B
CLPTM1	0.0336805	-0.252102	0.119	0.211	1	CLPTM1
NAPA	0.0337355	0.126805	0.237	0.123	1	NAPA
HAGH	0.0339229	-0.227837	0.339	0.456	1	HAGH
TMEM161A	0.0339567	-0.236842	0.076	0.158	1	TMEM161A
EXOC5	0.0341311	0.18359	0.195	0.096	1	EXOC5
KIDINS220	0.034244	0.260979	0.305	0.184	1	KIDINS220
VHL	0.034312	-0.269106	0.144	0.246	1	VHL
PSMD14	0.0343895	0.193565	0.339	0.211	1	PSMD14
RAB11B	0.0345025	-0.224162	0.212	0.325	1	RAB11B
ARHGAP5	0.034558	0.118311	0.186	0.088	1	ARHGAP5
TMEM120B	0.0346264	-0.26004	0.161	0.263	1	TMEM120B
ADO	0.0349316	-0.0954292	0.034	0.105	1	ADO
DENND6A	0.0349788	-0.212329	0.093	0.184	1	DENND6A
MT-ND5	0.0350877	0.112106	0.992	0.982	1	MT-ND5
ETFRF1	0.0351437	0.106292	0.153	0.061	1	ETFRF1
ODR4	0.0351583	0.107185	0.161	0.07	1	ODR4
C1orf21	0.035358	-0.357381	0.263	0.351	1	C1orf21
KDM1A	0.0353889	0.182594	0.203	0.105	1	KDM1A
MRPS33	0.0356256	0.21112	0.305	0.193	1	MRPS33
CCDC115	0.0357602	-0.278268	0.144	0.237	1	CCDC115
S100A4	0.0358678	0.233219	0.898	0.86	1	S100A4
TAF13	0.0358754	0.0752826	0.11	0.035	1	TAF13
CXCR4	0.0359105	-0.175769	0.517	0.64	1	CXCR4
CTR9	0.0359964	0.13505	0.229	0.123	1	CTR9
PFN1	0.0360306	-0.0998341	0.983	0.991	1	PFN1
ERAP1	0.0360363	0.181838	0.263	0.149	1	ERAP1
DDX56	0.0362242	0.204049	0.22	0.123	1	DDX56
EEF2	0.036568	-0.240805	0.686	0.702	1	EEF2
AC118549.1	0.0367656	0.131792	0.136	0.053	1	AC118549.1
TMEM208	0.0367873	0.134486	0.441	0.289	1	TMEM208
USB1	0.0368531	0.140336	0.186	0.088	1	USB1
43895	0.0369786	0.168098	0.169	0.079	1	43895
PRDX6	0.0371025	-0.231252	0.534	0.596	1	PRDX6
ARHGAP30	0.0373294	0.144843	0.661	0.5	1	ARHGAP30
USP39	0.0374739	0.156188	0.144	0.061	1	USP39
C12orf4	0.0375639	-0.16607	0.042	0.114	1	C12orf4
POP4	0.037614	0.177913	0.203	0.105	1	POP4
OASL	0.0376923	0.350081	0.288	0.175	1	OASL
FLI1	0.0377829	-0.200536	0.136	0.237	1	FLI1
TMX4	0.038151	-0.205342	0.398	0.518	1	TMX4
TEDC1	0.0383452	-0.184842	0.042	0.114	1	TEDC1
TROVE2	0.0384545	0.152736	0.356	0.219	1	TROVE2
UQCRB	0.0386459	0.153114	0.847	0.763	1	UQCRB
CDC16	0.0387497	0.217701	0.153	0.07	1	CDC16
TBC1D1	0.0388929	0.209236	0.237	0.14	1	TBC1D1
IKBKB	0.0389297	-0.277608	0.136	0.228	1	IKBKB
METTL14	0.0389642	-0.136509	0.076	0.167	1	METTL14
NFE2L1	0.039058	0.135834	0.119	0.044	1	NFE2L1
IFI27L1	0.0393839	0.132049	0.102	0.035	1	IFI27L1
ZMAT5	0.0395565	0.16346	0.144	0.061	1	ZMAT5
MMAB	0.0398457	0.125935	0.119	0.044	1	MMAB
NXPE3	0.0401534	-0.206491	0.068	0.149	1	NXPE3
ICMT	0.0402445	0.0823402	0.119	0.044	1	ICMT
PGK1	0.0403018	0.232656	0.627	0.535	1	PGK1
DOPEY2	0.0403592	-0.138213	0.042	0.114	1	DOPEY2
SIRT2	0.0404144	0.244804	0.212	0.114	1	SIRT2
SNRPF	0.0404402	0.165947	0.5	0.351	1	SNRPF
UBL5	0.04049	0.17596	0.814	0.649	1	UBL5
H1FX	0.0406446	-0.131512	0.585	0.702	1	H1FX
MIS18A	0.0406788	0.166814	0.102	0.035	1	MIS18A
WDHD1	0.0406788	0.14202	0.102	0.035	1	WDHD1
NIPA2	0.0408197	0.13506	0.195	0.096	1	NIPA2
USP48	0.0409386	-0.319478	0.161	0.263	1	USP48
SNX18	0.0414833	0.101127	0.271	0.149	1	SNX18
HIST3H2A	0.0415179	0.13803	0.169	0.079	1	HIST3H2A
CD3E	0.0415595	0.205342	0.398	0.289	1	CD3E
AC114760.2	0.0416897	0.191499	0.178	0.088	1	AC114760.2
CSE1L	0.0418831	0.189009	0.153	0.07	1	CSE1L
IFI6	0.0419863	0.389544	0.364	0.254	1	IFI6
ARL16	0.0420339	0.238971	0.263	0.158	1	ARL16
PHACTR4	0.0421075	0.187359	0.203	0.105	1	PHACTR4
SRP9	0.0421735	-0.237197	0.602	0.605	1	SRP9
MT-ND1	0.0424506	0.0982826	1	1	1	MT-ND1
ADPRM	0.0424611	0.140411	0.102	0.035	1	ADPRM
C1orf43	0.0426141	0.151765	0.331	0.202	1	C1orf43
PMM2	0.0427021	0.21337	0.127	0.053	1	PMM2
NCKAP1L	0.0427141	0.160393	0.381	0.237	1	NCKAP1L
SIVA1	0.0427292	0.197552	0.619	0.456	1	SIVA1
BLOC1S2	0.0427611	0.156619	0.339	0.211	1	BLOC1S2
ACTR8	0.0429169	0.107016	0.102	0.035	1	ACTR8
FABP5	0.0430351	0.1867	0.178	0.088	1	FABP5
PHB	0.0430391	0.131188	0.449	0.307	1	PHB
NPHP3	0.0432495	0.132785	0.169	0.079	1	NPHP3
LRBA	0.0432761	0.0955421	0.28	0.158	1	LRBA
MED25	0.0433768	0.134729	0.102	0.035	1	MED25
TMEM106C	0.0433928	0.195418	0.195	0.096	1	TMEM106C
ZNF598	0.0438225	-0.190112	0.051	0.123	1	ZNF598
UCP2	0.0439193	0.187834	0.525	0.377	1	UCP2
GTF2H3	0.0440174	0.117375	0.144	0.061	1	GTF2H3
ADPRHL2	0.0440571	0.110237	0.195	0.096	1	ADPRHL2
UTP6	0.0441091	0.152605	0.212	0.114	1	UTP6
VPS13D	0.044256	-0.215163	0.076	0.158	1	VPS13D
SLC12A6	0.0443175	-0.221384	0.085	0.167	1	SLC12A6
SEPHS1	0.0443374	0.157672	0.127	0.053	1	SEPHS1
MRPL12	0.0446233	0.187041	0.22	0.123	1	MRPL12
SFSWAP	0.0446927	-0.248308	0.169	0.272	1	SFSWAP
LRRC28	0.0447544	0.158653	0.127	0.053	1	LRRC28
OGFOD1	0.0447816	0.12954	0.102	0.035	1	OGFOD1
CD2	0.0447831	0.313152	0.703	0.596	1	CD2
MTA1	0.044819	-0.285148	0.11	0.193	1	MTA1
PPM1B	0.0448261	0.209241	0.203	0.114	1	PPM1B
WASF2	0.044903	0.171232	0.559	0.395	1	WASF2
TOPBP1	0.0451219	0.171647	0.178	0.088	1	TOPBP1
CCDC22	0.0451965	0.124069	0.144	0.061	1	CCDC22
DCAF6	0.0452281	0.1603	0.153	0.07	1	DCAF6
NDUFB6	0.0455575	0.125572	0.398	0.254	1	NDUFB6
ZNF33A	0.0455609	0.166477	0.28	0.167	1	ZNF33A
OPA1	0.0457063	0.165741	0.237	0.14	1	OPA1
KHDC4	0.0458617	0.133748	0.246	0.132	1	KHDC4
PITHD1	0.0459998	-0.239312	0.237	0.342	1	PITHD1
KIAA1586	0.0460252	0.121799	0.127	0.053	1	KIAA1586
B2M	0.0460611	0.0615105	1	1	1	B2M
PFDN6	0.0460634	0.161644	0.331	0.202	1	PFDN6
SYAP1	0.0461483	0.117706	0.28	0.158	1	SYAP1
PYHIN1	0.0464009	-0.239825	0.415	0.535	1	PYHIN1
PPT1	0.04656	0.164888	0.178	0.088	1	PPT1
HSF2	0.0467142	0.11206	0.102	0.035	1	HSF2
CTBP2	0.0468442	-0.183309	0.136	0.237	1	CTBP2
FKBP1A	0.0468863	-0.213635	0.381	0.5	1	FKBP1A
PIGP	0.0469701	0.183988	0.263	0.158	1	PIGP
TPM4	0.0471642	0.176195	0.415	0.272	1	TPM4
DOCK5	0.047428	-0.313639	0.068	0.14	1	DOCK5
PKN1	0.0476483	0.170558	0.475	0.351	1	PKN1
EHMT2	0.0476998	-0.196498	0.076	0.158	1	EHMT2
C3AR1	0.0477065	0.123535	0.102	0.035	1	C3AR1
PATJ	0.0477669	0.137415	0.127	0.053	1	PATJ
UBE2L6	0.0480029	0.237638	0.483	0.36	1	UBE2L6
TRIP4	0.0480365	0.113437	0.178	0.088	1	TRIP4
ZSCAN16-AS1	0.0480454	-0.181551	0.102	0.193	1	ZSCAN16-AS1
LAP3	0.0482529	0.157911	0.288	0.175	1	LAP3
NCAM1	0.0486061	0.112411	0.305	0.175	1	NCAM1
FCMR	0.0486061	-0.172256	0.186	0.298	1	FCMR
CDV3	0.0486502	0.240187	0.508	0.412	1	CDV3
DRG1	0.0487959	0.151696	0.153	0.07	1	DRG1
ELOF1	0.0488025	0.149313	0.254	0.149	1	ELOF1
ING2	0.0488966	-0.189555	0.076	0.158	1	ING2
ALG5	0.0492841	-0.179935	0.144	0.246	1	ALG5
ATF7IP2	0.0493565	0.1896	0.195	0.105	1	ATF7IP2
EIF4H	0.0494537	-0.221241	0.271	0.368	1	EIF4H
UNC45A	0.049557	0.192717	0.237	0.14	1	UNC45A
ATP5MF	0.0495889	0.168689	0.593	0.456	1	ATP5MF
GBF1	0.0498241	0.192412	0.11	0.044	1	GBF1
RASA3	0.0500365	0.131905	0.153	0.07	1	RASA3
TCAIM	0.0500529	-0.108923	0.051	0.123	1	TCAIM
PSMB8	0.0502397	0.125697	0.771	0.702	1	PSMB8
MAP4K4	0.0503284	0.20255	0.203	0.114	1	MAP4K4
STAM2	0.0503965	-0.203304	0.085	0.167	1	STAM2
PSMB10	0.0506033	0.214431	0.331	0.211	1	PSMB10
SMDT1	0.0508134	0.187839	0.712	0.614	1	SMDT1
GATD1	0.0508781	0.11905	0.153	0.07	1	GATD1
AMZ2	0.0508994	0.130037	0.212	0.114	1	AMZ2
MKNK2	0.0509147	0.132736	0.254	0.149	1	MKNK2
ORAI1	0.0510145	0.166336	0.398	0.289	1	ORAI1
FOPNL	0.0513076	0.138695	0.136	0.061	1	FOPNL
ITGAX	0.0513299	0.282592	0.288	0.175	1	ITGAX
CARNMT1	0.0513719	0.0265962	0.119	0.044	1	CARNMT1
ITM2A	0.0516044	0.227123	0.551	0.404	1	ITM2A
SEC23IP	0.0517315	0.123038	0.153	0.07	1	SEC23IP
MAPKAPK5-AS1	0.0518067	-0.184591	0.119	0.211	1	MAPKAPK5-AS1
ACAA2	0.0518397	0.173995	0.398	0.263	1	ACAA2
ERGIC3	0.0523373	0.130978	0.263	0.149	1	ERGIC3
MICAL2	0.0523937	0.0997286	0.102	0.035	1	MICAL2
P4HB	0.0524994	-0.273115	0.373	0.465	1	P4HB
RABAC1	0.0528663	0.206556	0.771	0.675	1	RABAC1
TECR	0.0528902	0.163404	0.398	0.281	1	TECR
MRPL15	0.0529079	0.187979	0.203	0.114	1	MRPL15
AP1S2	0.0529471	-0.265231	0.127	0.219	1	AP1S2
SUPT20H	0.0537021	-0.164599	0.169	0.272	1	SUPT20H
EBPL	0.0537324	0.168357	0.263	0.158	1	EBPL
CD74	0.0538345	0.139018	0.678	0.5	1	CD74
NCR3	0.054135	0.235349	0.432	0.325	1	NCR3
RHOF	0.0541702	0.113069	0.585	0.412	1	RHOF
COA1	0.0542445	-0.220065	0.458	0.535	1	COA1
ALYREF	0.0547494	0.15478	0.237	0.14	1	ALYREF
STAT6	0.0548173	0.200952	0.203	0.114	1	STAT6
FUT8	0.0548947	0.196259	0.186	0.105	1	FUT8
MORF4L1	0.0552866	0.195419	0.703	0.57	1	MORF4L1
CDC14A	0.0553691	-0.280341	0.161	0.246	1	CDC14A
NFU1	0.0555976	0.115451	0.178	0.088	1	NFU1
KIAA1551	0.0557843	0.164791	0.712	0.623	1	KIAA1551
CNOT7	0.0558313	0.14182	0.347	0.237	1	CNOT7
MAGOH	0.055834	0.1628	0.508	0.386	1	MAGOH
JADE1	0.0558406	0.159264	0.237	0.14	1	JADE1
PPP4C	0.0559121	0.16198	0.492	0.342	1	PPP4C
NABP2	0.0559734	0.158523	0.169	0.088	1	NABP2
ARHGDIA	0.0559849	0.170036	0.644	0.526	1	ARHGDIA
PHRF1	0.0564058	0.171099	0.169	0.088	1	PHRF1
IKZF3	0.0564325	-0.177416	0.525	0.632	1	IKZF3
RNF187	0.0565203	0.170112	0.356	0.246	1	RNF187
GLIPR1	0.056613	-0.212723	0.432	0.526	1	GLIPR1
RCSD1	0.0567066	-0.288526	0.339	0.421	1	RCSD1
YBX1	0.0568473	0.147907	0.847	0.772	1	YBX1
ZSCAN26	0.0569826	-0.195812	0.042	0.105	1	ZSCAN26
GMEB1	0.0571841	0.209904	0.203	0.114	1	GMEB1
PPIP5K2	0.0572686	-0.294639	0.186	0.272	1	PPIP5K2
CBFB	0.0574722	0.15347	0.178	0.096	1	CBFB
FAM117A	0.0575756	0.114074	0.153	0.07	1	FAM117A
MT-ATP6	0.0578281	0.0475554	1	1	1	MT-ATP6
PI4KB	0.0579505	0.157219	0.136	0.061	1	PI4KB
ILF3-DT	0.0579748	0.188933	0.229	0.132	1	ILF3-DT
URM1	0.0581264	0.203424	0.254	0.158	1	URM1
DGKZ	0.0581816	-0.149789	0.381	0.509	1	DGKZ
FAM3A	0.058365	0.102462	0.127	0.053	1	FAM3A
FAM126B	0.0584059	-0.225788	0.102	0.184	1	FAM126B
SMYD4	0.0585079	0.0868935	0.11	0.044	1	SMYD4
MRPL23	0.058631	0.199307	0.22	0.132	1	MRPL23
SP110	0.0586657	0.231895	0.525	0.395	1	SP110
RNF214	0.0587435	-0.143297	0.059	0.132	1	RNF214
PPP2R2D	0.0587705	-0.205697	0.068	0.14	1	PPP2R2D
CLP1	0.0587898	0.157048	0.11	0.044	1	CLP1
BABAM1	0.0588184	-0.232995	0.144	0.228	1	BABAM1
EXOG	0.0588553	0.140731	0.22	0.123	1	EXOG
NIPSNAP1	0.0594213	-0.164499	0.085	0.167	1	NIPSNAP1
TTC38	0.0594353	0.125078	0.212	0.123	1	TTC38
ALKBH7	0.0594612	0.197831	0.347	0.246	1	ALKBH7
FEM1B	0.0594654	0.136009	0.161	0.079	1	FEM1B
PRIM2	0.0594654	0.108108	0.161	0.079	1	PRIM2
AC058791.1	0.0598031	-0.193641	0.144	0.237	1	AC058791.1
MPG	0.0598256	0.194762	0.492	0.377	1	MPG
C11orf21	0.0598646	-0.232544	0.042	0.105	1	C11orf21
AVEN	0.0599277	0.166663	0.11	0.044	1	AVEN
AMDHD2	0.0599277	0.139003	0.11	0.044	1	AMDHD2
DNAJC30	0.060092	0.180379	0.178	0.096	1	DNAJC30
AKR1B1	0.0601583	0.148219	0.263	0.158	1	AKR1B1
CAMK2D	0.0603046	-0.169722	0.059	0.132	1	CAMK2D
CAMK1	0.0605034	0.141861	0.11	0.044	1	CAMK1
FOCAD	0.0605034	0.128685	0.11	0.044	1	FOCAD
RFC4	0.0605034	0.11178	0.11	0.044	1	RFC4
TXNDC15	0.0606623	0.216088	0.212	0.123	1	TXNDC15
ARRB2	0.0608209	-0.217011	0.314	0.404	1	ARRB2
TYROBP	0.0608482	-0.167024	0.958	0.947	1	TYROBP
RPLP0	0.0608866	0.102636	0.898	0.912	1	RPLP0
TXNIP	0.0609012	-0.154243	0.873	0.947	1	TXNIP
UBQLN2	0.060987	-0.0791409	0.093	0.184	1	UBQLN2
EBAG9	0.0610282	0.114988	0.229	0.123	1	EBAG9
TMEM147-AS1	0.0610507	-0.158936	0.042	0.105	1	TMEM147-AS1
ERI1	0.0610837	0.106551	0.11	0.044	1	ERI1
PITPNB	0.061499	-0.238893	0.22	0.325	1	PITPNB
RAE1	0.0617826	-0.168659	0.093	0.175	1	RAE1
CSRP1	0.0620631	-0.183459	0.068	0.14	1	CSRP1
EIF3K	0.0620909	-0.144012	0.729	0.772	1	EIF3K
RPS11	0.0622212	0.104991	0.983	0.991	1	RPS11
DNASE1	0.0623459	-0.169594	0.136	0.228	1	DNASE1
RPS7	0.0623589	-0.0655115	1	1	1	RPS7
GPS2	0.062583	-0.176857	0.068	0.14	1	GPS2
TFIP11	0.0625873	0.158399	0.136	0.061	1	TFIP11
IFT27	0.0625873	0.13867	0.136	0.061	1	IFT27
FDFT1	0.0627506	0.207883	0.263	0.167	1	FDFT1
FURIN	0.0627741	0.15468	0.237	0.14	1	FURIN
DYM	0.0628107	0.100048	0.161	0.079	1	DYM
DTHD1	0.0628524	0.184336	0.11	0.044	1	DTHD1
NDUFC1	0.062972	0.230388	0.373	0.263	1	NDUFC1
PPP1R3E	0.0629829	-0.10774	0.059	0.132	1	PPP1R3E
CYTH4	0.063648	0.183133	0.373	0.246	1	CYTH4
XAB2	0.0636509	-0.183833	0.093	0.175	1	XAB2
SPAG7	0.0638292	0.152234	0.398	0.263	1	SPAG7
PRKD2	0.0639139	-0.176714	0.119	0.202	1	PRKD2
PPP1R15A	0.063952	0.201546	0.169	0.088	1	PPP1R15A
BAZ1B	0.0640091	0.11176	0.407	0.281	1	BAZ1B
PIM2	0.0640814	-0.150044	0.059	0.132	1	PIM2
NEDD9	0.0643299	-0.216398	0.153	0.237	1	NEDD9
FUOM	0.0644443	0.106265	0.212	0.114	1	FUOM
SUPT4H1	0.0646256	-0.287643	0.22	0.316	1	SUPT4H1
NOL9	0.0646632	0.116352	0.11	0.044	1	NOL9
EFTUD2	0.0647912	0.0910923	0.161	0.079	1	EFTUD2
SREK1	0.0648375	0.207516	0.373	0.263	1	SREK1
GPATCH4	0.0648839	0.118735	0.212	0.114	1	GPATCH4
VOPP1	0.0652546	0.107592	0.254	0.149	1	VOPP1
COPS9	0.0657329	0.168687	0.551	0.412	1	COPS9
ATP6AP2	0.066095	0.189396	0.5	0.368	1	ATP6AP2
AL034397.3	0.0665168	0.114322	0.11	0.044	1	AL034397.3
PLPP5	0.0665983	-0.136558	0.068	0.14	1	PLPP5
MGST3	0.0666275	0.170324	0.466	0.333	1	MGST3
PASK	0.0666318	-0.130533	0.042	0.105	1	PASK
C9orf16	0.0673302	0.182659	0.703	0.544	1	C9orf16
IL7R	0.0675717	0.289262	0.415	0.289	1	IL7R
PARP1	0.0676108	0.177923	0.551	0.412	1	PARP1
AKAP8L	0.0677232	0.126814	0.246	0.149	1	AKAP8L
XBP1	0.0678315	0.183032	0.483	0.342	1	XBP1
DCXR	0.06858	0.146416	0.331	0.211	1	DCXR
CIRBP	0.068604	-0.164644	0.653	0.684	1	CIRBP
UBE2D2	0.0689184	-0.132408	0.542	0.623	1	UBE2D2
PYGO2	0.0689376	0.102483	0.119	0.053	1	PYGO2
ITGA4	0.0692674	0.11094	0.449	0.316	1	ITGA4
ZFP36L2	0.0692791	-0.108519	0.703	0.807	1	ZFP36L2
SYNCRIP	0.0692922	0.167567	0.466	0.333	1	SYNCRIP
AC005332.5	0.0693795	-0.203075	0.119	0.202	1	AC005332.5
NMI	0.0694281	0.245553	0.373	0.263	1	NMI
ABCA5	0.0695307	-0.167732	0.076	0.149	1	ABCA5
NKTR	0.069587	-0.249675	0.424	0.518	1	NKTR
LFNG	0.0696503	0.133766	0.212	0.114	1	LFNG
FAM114A2	0.0696504	-0.123743	0.119	0.211	1	FAM114A2
MED27	0.0697033	0.0547839	0.11	0.044	1	MED27
CDK13	0.0697072	-0.179262	0.407	0.509	1	CDK13
EPC2	0.0699502	0.131373	0.144	0.07	1	EPC2
CCNG2	0.0699611	-0.163229	0.068	0.14	1	CCNG2
CYTH1	0.0699686	0.136683	0.28	0.175	1	CYTH1
HSPB11	0.0699806	0.201358	0.415	0.298	1	HSPB11
RB1CC1	0.0702322	0.211528	0.288	0.193	1	RB1CC1
STXBP3	0.0704286	0.120161	0.28	0.167	1	STXBP3
SLC38A1	0.070681	0.133861	0.559	0.43	1	SLC38A1
PRF1	0.0708469	0.186804	0.729	0.623	1	PRF1
WASHC1	0.0710677	0.160278	0.178	0.096	1	WASHC1
DENND6B	0.0710679	0.121483	0.178	0.096	1	DENND6B
MAN1B1	0.0710806	0.137868	0.144	0.07	1	MAN1B1
WRNIP1	0.0712575	-0.122154	0.042	0.105	1	WRNIP1
ABI3	0.0713918	0.0673226	0.322	0.202	1	ABI3
DEK	0.0714584	0.154916	0.636	0.535	1	DEK
GSN	0.0714767	0.0551057	0.186	0.096	1	GSN
HDDC3	0.0715296	-0.16374	0.11	0.193	1	HDDC3
RFWD3	0.0721823	0.0701166	0.136	0.061	1	RFWD3
SZRD1	0.0725098	0.175543	0.314	0.202	1	SZRD1
AES	0.0725718	-0.137556	0.805	0.816	1	AES
SMC4	0.0728054	0.227261	0.305	0.202	1	SMC4
PAG1	0.0728192	0.130507	0.339	0.219	1	PAG1
CTSS	0.0728937	0.134741	0.415	0.289	1	CTSS
ZNF677	0.0730251	-0.17115	0.11	0.193	1	ZNF677
RDX	0.0730725	-0.202486	0.195	0.281	1	RDX
KNOP1	0.073135	0.11236	0.178	0.096	1	KNOP1
COMMD5	0.0733407	-0.127293	0.144	0.237	1	COMMD5
NAA38	0.0733506	0.192979	0.466	0.351	1	NAA38
APIP	0.0734617	-0.110748	0.068	0.14	1	APIP
TMEM8A	0.0737262	0.138665	0.203	0.114	1	TMEM8A
NDUFB8	0.0737355	0.1423	0.661	0.535	1	NDUFB8
PRPF19	0.0740168	-0.0720242	0.042	0.105	1	PRPF19
UBE2F	0.0740655	0.179885	0.28	0.184	1	UBE2F
EHMT1	0.0742795	-0.202748	0.186	0.281	1	EHMT1
HNRNPUL1	0.0743483	0.125094	0.314	0.202	1	HNRNPUL1
RPL4	0.0744754	-0.142651	0.873	0.86	1	RPL4
MRPL39	0.074632	-0.180636	0.085	0.158	1	MRPL39
MFSD6	0.0746428	0.112853	0.119	0.053	1	MFSD6
RAB3GAP2	0.0747403	0.15111	0.22	0.132	1	RAB3GAP2
ALDH18A1	0.0750616	0.0800391	0.11	0.044	1	ALDH18A1
GUCD1	0.0750946	0.0599593	0.186	0.096	1	GUCD1
PHTF1	0.0751175	0.162597	0.153	0.079	1	PHTF1
RIPK1	0.0751791	0.168869	0.195	0.114	1	RIPK1
REC8	0.0752998	0.101137	0.119	0.053	1	REC8
ZNF611	0.0753263	0.194283	0.127	0.061	1	ZNF611
NEAT1	0.0753597	-0.165403	0.763	0.851	1	NEAT1
GTF3C6	0.0755403	0.14706	0.5	0.377	1	GTF3C6
TRIM52	0.0757041	-0.20891	0.153	0.237	1	TRIM52
PPP1R8	0.0757528	0.11908	0.144	0.07	1	PPP1R8
PATL2	0.075809	-0.141555	0.051	0.114	1	PATL2
FARS2	0.0759616	0.123887	0.119	0.053	1	FARS2
RFC1	0.0760589	0.104108	0.424	0.281	1	RFC1
COIL	0.0763277	0.158038	0.178	0.096	1	COIL
TGFBR1	0.0766787	0.118957	0.169	0.088	1	TGFBR1
SNX2	0.0767397	0.209737	0.263	0.175	1	SNX2
RSPRY1	0.0768597	0.136139	0.153	0.079	1	RSPRY1
TBC1D22A	0.0769584	-0.213038	0.11	0.184	1	TBC1D22A
LAPTM4B	0.0771765	-0.121831	0.051	0.114	1	LAPTM4B
ARRDC2	0.0774911	-0.187461	0.11	0.184	1	ARRDC2
HDAC1	0.0775016	0.171937	0.381	0.263	1	HDAC1
DDX60	0.0775616	0.142988	0.246	0.149	1	DDX60
NAALADL1	0.0777586	0.159622	0.186	0.105	1	NAALADL1
MED12	0.0778678	-0.137542	0.051	0.114	1	MED12
PIK3AP1	0.0780394	0.159274	0.153	0.079	1	PIK3AP1
ELP3	0.0781812	0.107989	0.144	0.07	1	ELP3
DBF4	0.0782958	0.17314	0.186	0.105	1	DBF4
ZBTB40	0.0783512	-0.11029	0.068	0.14	1	ZBTB40
AP3B1	0.0786124	0.140911	0.212	0.123	1	AP3B1
CMPK1	0.0790972	0.149461	0.39	0.254	1	CMPK1
STK38	0.0791241	-0.18514	0.127	0.211	1	STK38
CHM	0.0791622	-0.221066	0.136	0.219	1	CHM
TMEM187	0.0791951	0.112849	0.127	0.061	1	TMEM187
KIAA1468	0.0792654	-0.135427	0.051	0.114	1	KIAA1468
HSPE1	0.0792819	0.209539	0.534	0.43	1	HSPE1
AC008105.3	0.0794046	-0.181045	0.331	0.43	1	AC008105.3
TXNDC11	0.079419	0.0998776	0.144	0.07	1	TXNDC11
ASCC2	0.0795144	0.128543	0.169	0.088	1	ASCC2
POMP	0.0795606	0.132917	0.72	0.614	1	POMP
MICB	0.0796141	-0.087495	0.068	0.14	1	MICB
HIST1H1C	0.0798407	-0.156481	0.254	0.342	1	HIST1H1C
ANGPT2	0.0798554	0.179019	0.127	0.061	1	ANGPT2
EXOSC10	0.079874	-0.197259	0.059	0.123	1	EXOSC10
CD55	0.0800326	0.104602	0.119	0.053	1	CD55
EIF3J-DT	0.0801907	-0.254438	0.186	0.272	1	EIF3J-DT
SMC2	0.0804209	0.166472	0.254	0.158	1	SMC2
SLC25A11	0.0805323	-0.191295	0.212	0.307	1	SLC25A11
LPP	0.0805795	0.172299	0.297	0.202	1	LPP
SEL1L3	0.0805944	-0.127597	0.136	0.228	1	SEL1L3
RAB1B	0.0806513	-0.122227	0.178	0.281	1	RAB1B
MAP3K7	0.0806727	0.0967238	0.144	0.07	1	MAP3K7
IP6K2	0.0806919	0.145411	0.263	0.167	1	IP6K2
CDCA7	0.080728	0.114148	0.119	0.053	1	CDCA7
MKNK1	0.0810531	0.137995	0.153	0.079	1	MKNK1
POLD2	0.0810531	0.077002	0.153	0.079	1	POLD2
NFE2L3	0.0812987	0.140181	0.102	0.044	1	NFE2L3
WDR60	0.0813055	0.0839809	0.144	0.07	1	WDR60
AIMP2	0.0814283	0.0933655	0.119	0.053	1	AIMP2
PRPF38A	0.0815159	-0.234361	0.322	0.386	1	PRPF38A
LRR1	0.0816192	-0.205516	0.068	0.132	1	LRR1
PRKDC	0.0818062	0.194837	0.381	0.272	1	PRKDC
CHST12	0.0818831	0.136701	0.525	0.377	1	CHST12
ING4	0.0819969	-0.154327	0.144	0.237	1	ING4
MAN2C1	0.0821218	-0.125879	0.051	0.114	1	MAN2C1
DNAAF2	0.0821336	0.109021	0.119	0.053	1	DNAAF2
SAR1A	0.0822187	-0.229028	0.28	0.377	1	SAR1A
AOAH	0.0825093	-0.18169	0.508	0.579	1	AOAH
ACYP2	0.0826182	-0.139422	0.059	0.123	1	ACYP2
C6orf62	0.082777	0.0586558	0.466	0.333	1	C6orf62
SERINC1	0.0827791	-0.308925	0.229	0.307	1	SERINC1
ZDHHC18	0.0827827	-0.206943	0.127	0.211	1	ZDHHC18
MTOR	0.0828226	0.13984	0.102	0.044	1	MTOR
BCL2L13	0.0828438	0.0784438	0.119	0.053	1	BCL2L13
SYTL2	0.0829063	0.163581	0.153	0.079	1	SYTL2
NAPG	0.0829063	0.12703	0.153	0.079	1	NAPG
GCSH	0.0829499	-0.15228	0.068	0.132	1	GCSH
PDE3B	0.0829642	-0.251501	0.229	0.316	1	PDE3B
PSMB7	0.0830907	0.204715	0.458	0.351	1	PSMB7
TIA1	0.0832678	0.154392	0.186	0.105	1	TIA1
BICDL1	0.0833231	-0.158357	0.169	0.263	1	BICDL1
NINJ1	0.0833445	-0.267919	0.102	0.175	1	NINJ1
ALG13	0.0833773	-0.170701	0.178	0.272	1	ALG13
ATP5PO	0.0833992	0.155816	0.585	0.482	1	ATP5PO
SRSF7	0.0834799	-0.129603	0.754	0.754	1	SRSF7
NCL	0.0835281	0.119558	0.847	0.825	1	NCL
YIF1B	0.0835316	0.114849	0.153	0.079	1	YIF1B
PRH1	0.0836102	0.0894908	0.314	0.193	1	PRH1
PIGX	0.0839164	0.113931	0.161	0.088	1	PIGX
POLR2H	0.0839735	0.144051	0.288	0.184	1	POLR2H
CDKN2D	0.0841254	0.110688	0.449	0.316	1	CDKN2D
NSUN5	0.0843329	0.200539	0.254	0.167	1	NSUN5
MKI67	0.0843697	0.237754	0.102	0.044	1	MKI67
ZNF514	0.0843697	0.158571	0.102	0.044	1	ZNF514
CENPU	0.0843697	0.14373	0.102	0.044	1	CENPU
LRRC37B	0.0846033	0.151161	0.127	0.061	1	LRRC37B
HTT	0.0849809	0.14162	0.186	0.105	1	HTT
NDUFA12	0.0851377	-0.194792	0.508	0.553	1	NDUFA12
PPP6R2	0.085293	0.0365621	0.203	0.114	1	PPP6R2
TIMM9	0.0855582	0.138279	0.186	0.105	1	TIMM9
GOLGA2	0.0856228	0.171445	0.169	0.096	1	GOLGA2
BRAT1	0.0857344	0.0813587	0.119	0.053	1	BRAT1
KBTBD3	0.0858489	0.0967591	0.144	0.07	1	KBTBD3
WDR11	0.0858518	0.10145	0.203	0.114	1	WDR11
TXN2	0.0862059	0.118481	0.364	0.246	1	TXN2
NCOA4	0.0868255	0.143333	0.237	0.149	1	NCOA4
DLEU2	0.087184	0.0911733	0.144	0.07	1	DLEU2
CBX5	0.0872566	0.158336	0.288	0.193	1	CBX5
ACSL5	0.0873211	-0.0942923	0.051	0.114	1	ACSL5
DYNLL1	0.0874813	-0.135596	0.754	0.772	1	DYNLL1
SLBP	0.0879822	0.181349	0.288	0.193	1	SLBP
RPL5	0.0883309	-0.0988558	0.983	1	1	RPL5
GOLGA1	0.088336	-0.148921	0.059	0.123	1	GOLGA1
UBE2V2	0.0884971	0.0888512	0.322	0.211	1	UBE2V2
KLHDC4	0.0886903	0.0967072	0.203	0.114	1	KLHDC4
AHR	0.0887061	0.0735337	0.119	0.053	1	AHR
DTNBP1	0.0888078	0.0935362	0.212	0.123	1	DTNBP1
ATP10A	0.0890726	-0.148891	0.059	0.123	1	ATP10A
VAV1	0.0891656	-0.141712	0.093	0.167	1	VAV1
EIF4B	0.0892296	0.185174	0.483	0.377	1	EIF4B
ROCK1	0.0892492	0.14611	0.619	0.518	1	ROCK1
POLR3D	0.0893327	0.104864	0.153	0.079	1	POLR3D
RHOA	0.0894883	0.125965	0.839	0.746	1	RHOA
LTV1	0.0895575	-0.232823	0.153	0.228	1	LTV1
PRMT1	0.0895586	0.144568	0.475	0.36	1	PRMT1
GCA	0.0895771	0.114019	0.127	0.061	1	GCA
EMC3	0.0896925	0.191363	0.263	0.175	1	EMC3
CD7	0.089728	0.106423	0.941	0.904	1	CD7
DIS3	0.0898277	0.113721	0.237	0.14	1	DIS3
GLRX	0.0898582	0.23316	0.458	0.342	1	GLRX
OGFR	0.0899815	0.189783	0.305	0.211	1	OGFR
TCF12	0.0902227	0.0656393	0.119	0.053	1	TCF12
MRPL17	0.0904644	0.101675	0.314	0.202	1	MRPL17
BIRC6	0.0905105	0.0891647	0.415	0.289	1	BIRC6
TMEM209	0.0907931	0.0964159	0.102	0.044	1	TMEM209
USP37	0.0907931	0.0671333	0.102	0.044	1	USP37
G3BP1	0.0909214	0.100969	0.449	0.325	1	G3BP1
ACLY	0.0910002	0.104638	0.153	0.079	1	ACLY
NF2	0.091029	0.147239	0.136	0.07	1	NF2
PRDX5	0.0910817	-0.160225	0.636	0.693	1	PRDX5
CALM3	0.0911801	0.171376	0.576	0.474	1	CALM3
STX18	0.091398	-0.153185	0.093	0.167	1	STX18
ARF3	0.0915003	0.103863	0.178	0.096	1	ARF3
GALE	0.0917395	0.152753	0.136	0.07	1	GALE
R3HDM1	0.0920544	0.168291	0.246	0.158	1	R3HDM1
ADPGK	0.0929155	0.0619659	0.229	0.132	1	ADPGK
XAF1	0.0929516	0.174837	0.322	0.219	1	XAF1
FAM204A	0.0929981	-0.157393	0.254	0.36	1	FAM204A
CCDC137	0.0930892	0.0522754	0.203	0.114	1	CCDC137
GLCCI1	0.0931407	-0.157876	0.229	0.333	1	GLCCI1
WSB2	0.0932719	0.101058	0.127	0.061	1	WSB2
WDR41	0.0938977	0.144206	0.136	0.07	1	WDR41
COA6	0.094055	0.189629	0.22	0.14	1	COA6
SNX20	0.0943865	0.110154	0.347	0.237	1	SNX20
SNX10	0.094472	-0.213718	0.161	0.237	1	SNX10
CD48	0.0945136	0.155274	0.856	0.781	1	CD48
NAGK	0.0947319	0.172904	0.288	0.193	1	NAGK
ATXN1	0.0948193	0.170746	0.263	0.167	1	ATXN1
UNG	0.0948677	0.190532	0.144	0.079	1	UNG
FAM49A	0.0950036	0.0888258	0.102	0.044	1	FAM49A
EPC1	0.0950906	-0.209492	0.39	0.465	1	EPC1
MALAT1	0.0953023	-0.110317	1	1	1	MALAT1
DCUN1D5	0.0953281	0.158501	0.246	0.158	1	DCUN1D5
CASP2	0.095495	0.0940665	0.161	0.088	1	CASP2
CENPC	0.0956032	0.124493	0.424	0.316	1	CENPC
SYPL1	0.0956783	0.166514	0.305	0.202	1	SYPL1
EFHD2	0.0958877	0.139994	0.737	0.614	1	EFHD2
POLDIP3	0.0959271	-0.108406	0.059	0.123	1	POLDIP3
CEBPB	0.0959454	-0.198792	0.305	0.412	1	CEBPB
MNAT1	0.0960463	0.12998	0.22	0.132	1	MNAT1
SSNA1	0.0960673	0.17315	0.542	0.421	1	SSNA1
MED13	0.096078	0.113446	0.212	0.123	1	MED13
ZNF655	0.096559	0.0893981	0.28	0.175	1	ZNF655
HIST1H2BC	0.0968385	0.151543	0.136	0.07	1	HIST1H2BC
SLC25A6	0.0969063	-0.112222	0.771	0.851	1	SLC25A6
ADRB2	0.0969564	-0.183013	0.102	0.175	1	ADRB2
BICRAL	0.0972458	-0.167244	0.068	0.132	1	BICRAL
PDXDC1	0.0974073	0.214016	0.186	0.114	1	PDXDC1
ORC2	0.0976795	0.144348	0.11	0.053	1	ORC2
RBM38	0.0977027	-0.343176	0.22	0.298	1	RBM38
SIKE1	0.097843	0.0939959	0.246	0.149	1	SIKE1
TRMT2A	0.097866	0.101713	0.127	0.061	1	TRMT2A
RNF170	0.0978882	0.109447	0.161	0.088	1	RNF170
JPX	0.0980783	0.163356	0.466	0.36	1	JPX
PRPS1	0.0982793	0.141892	0.203	0.123	1	PRPS1
COMMD4	0.0985703	0.198555	0.331	0.246	1	COMMD4
CEP290	0.0986485	-0.226052	0.136	0.211	1	CEP290
OSTF1	0.098833	-0.130266	0.593	0.658	1	OSTF1
CLNS1A	0.0993831	0.200583	0.356	0.272	1	CLNS1A
IPO9	0.0993929	-0.257231	0.11	0.175	1	IPO9
HIST1H4C	0.0995386	0.131138	0.449	0.325	1	HIST1H4C
CCNDBP1	0.0996811	-0.182709	0.381	0.482	1	CCNDBP1
UBC	0.0998523	0.112563	0.992	0.974	1	UBC
MRPL28	0.0999056	0.0801126	0.39	0.263	1	MRPL28
TECPR1	0.0999139	-0.0970951	0.059	0.123	1	TECPR1
RNF19A	0.0999194	0.193281	0.381	0.263	1	RNF19A
SUCO	0.100117	-0.190959	0.119	0.193	1	SUCO
COX19	0.100143	0.100948	0.246	0.149	1	COX19
APBA2	0.100438	0.0990705	0.195	0.114	1	APBA2
RAB7A	0.10112	0.154259	0.424	0.307	1	RAB7A
RAD9A	0.101173	0.072117	0.153	0.079	1	RAD9A
USP22	0.101289	-0.127837	0.127	0.211	1	USP22
BAZ2A	0.101346	-0.20935	0.203	0.281	1	BAZ2A
TIMP1	0.101503	0.132197	0.271	0.175	1	TIMP1
PIN1	0.101581	-0.188768	0.373	0.439	1	PIN1
SERPINB1	0.101618	0.134889	0.644	0.518	1	SERPINB1
HINT1	0.101682	0.109208	0.907	0.825	1	HINT1
ATP5F1B	0.101907	0.117048	0.551	0.421	1	ATP5F1B
PRR5L	0.101932	0.175613	0.186	0.114	1	PRR5L
SMAGP	0.102064	0.0921281	0.102	0.044	1	SMAGP
GEMIN6	0.102485	0.128157	0.169	0.096	1	GEMIN6
CHD2	0.102593	-0.0443948	0.28	0.377	1	CHD2
OXNAD1	0.102624	-0.290205	0.254	0.325	1	OXNAD1
BRF2	0.102781	0.15688	0.11	0.053	1	BRF2
NOC2L	0.102782	0.176223	0.237	0.158	1	NOC2L
SMNDC1	0.102782	0.167128	0.237	0.158	1	SMNDC1
NDUFB2	0.103074	0.118756	0.737	0.579	1	NDUFB2
ZNF507	0.103179	-0.211749	0.093	0.158	1	ZNF507
AKAP10	0.103183	0.123626	0.169	0.096	1	AKAP10
GIMAP5	0.103359	0.0612856	0.178	0.096	1	GIMAP5
CRNKL1	0.103364	-0.146583	0.119	0.193	1	CRNKL1
ZNF429	0.103489	-0.149638	0.068	0.132	1	ZNF429
MUM1	0.1037	-0.155329	0.186	0.272	1	MUM1
SIN3B	0.103893	0.067738	0.102	0.044	1	SIN3B
ELAC2	0.103901	-0.176384	0.093	0.158	1	ELAC2
HDAC7	0.103901	-0.194599	0.093	0.158	1	HDAC7
VAPB	0.103901	-0.198525	0.093	0.158	1	VAPB
SAMSN1	0.104019	-0.223679	0.381	0.456	1	SAMSN1
AKAP7	0.104133	-0.166655	0.085	0.149	1	AKAP7
YEATS4	0.104271	0.090085	0.127	0.061	1	YEATS4
TBC1D10A	0.104453	0.202025	0.153	0.088	1	TBC1D10A
PLP2	0.104555	0.14074	0.602	0.482	1	PLP2
CORO7	0.10459	0.143016	0.169	0.096	1	CORO7
IPO7	0.10459	0.109393	0.169	0.096	1	IPO7
RBM23	0.104681	0.135655	0.314	0.228	1	RBM23
EFR3A	0.104681	0.101478	0.322	0.219	1	EFR3A
CLDND1	0.105157	-0.202588	0.576	0.623	1	CLDND1
DDX49	0.105193	0.103158	0.22	0.132	1	DDX49
SNAPC2	0.105327	-0.141357	0.076	0.14	1	SNAPC2
TRAPPC11	0.105409	0.116786	0.11	0.053	1	TRAPPC11
IRF9	0.105416	0.155879	0.254	0.167	1	IRF9
BIRC2	0.10548	-0.159598	0.178	0.272	1	BIRC2
NAP1L4	0.105723	0.100123	0.661	0.482	1	NAP1L4
KLHL7	0.10573	-0.161142	0.051	0.105	1	KLHL7
BCL2	0.105769	-0.248778	0.186	0.263	1	BCL2
CBL	0.105824	0.135207	0.212	0.132	1	CBL
C19orf25	0.105883	0.13879	0.373	0.272	1	C19orf25
MCM3	0.106075	0.141405	0.297	0.202	1	MCM3
FAM214A	0.106313	-0.247934	0.169	0.237	1	FAM214A
PBDC1	0.106351	0.139986	0.331	0.228	1	PBDC1
TMEM251	0.106398	-0.175449	0.085	0.149	1	TMEM251
CALCOCO2	0.106789	0.124691	0.39	0.272	1	CALCOCO2
FAM76A	0.10683	0.0821351	0.161	0.088	1	FAM76A
ITGB1BP1	0.106843	0.145208	0.432	0.316	1	ITGB1BP1
USF3	0.106899	-0.212471	0.076	0.14	1	USF3
XRCC6	0.10771	0.0864041	0.576	0.421	1	XRCC6
HELB	0.107918	0.186968	0.237	0.158	1	HELB
AL390728.6	0.108377	-0.109631	0.068	0.132	1	AL390728.6
ZDHHC2	0.108391	0.130461	0.22	0.132	1	ZDHHC2
CCSER2	0.108606	0.15939	0.39	0.289	1	CCSER2
SUN2	0.108758	-0.129655	0.475	0.544	1	SUN2
ABR	0.108997	0.142714	0.11	0.053	1	ABR
DDX55	0.10907	0.138867	0.161	0.088	1	DDX55
PDCD4	0.109315	0.150734	0.763	0.649	1	PDCD4
DLGAP1-AS1	0.10981	0.173821	0.229	0.149	1	DLGAP1-AS1
CEP164	0.110099	-0.129091	0.076	0.14	1	CEP164
GPAA1	0.110438	-0.188832	0.169	0.246	1	GPAA1
MOCS2	0.110583	-0.201734	0.093	0.158	1	MOCS2
CYLD	0.110743	-0.157129	0.424	0.526	1	CYLD
SSBP1	0.110759	-0.135571	0.593	0.649	1	SSBP1
IRF2BPL	0.110822	-0.10476	0.102	0.175	1	IRF2BPL
OAT	0.110827	0.118347	0.11	0.053	1	OAT
RPL28	0.111	0.0756201	1	0.991	1	RPL28
CBX7	0.11106	0.146736	0.144	0.079	1	CBX7
UBE2L3	0.111224	0.135918	0.568	0.421	1	UBE2L3
TTC31	0.1113	-0.198328	0.051	0.105	1	TTC31
FAAP20	0.111441	0.0976669	0.398	0.281	1	FAAP20
UBE2A	0.111448	0.0335918	0.271	0.167	1	UBE2A
DYNC1I2	0.111525	-0.30323	0.271	0.333	1	DYNC1I2
LINC00667	0.111607	-0.158889	0.127	0.202	1	LINC00667
MALT1	0.111705	0.180634	0.203	0.132	1	MALT1
NAA16	0.111876	0.167959	0.178	0.105	1	NAA16
C1orf131	0.112047	-0.232618	0.161	0.228	1	C1orf131
MYO1F	0.112208	0.0853717	0.61	0.509	1	MYO1F
ZMAT2	0.11223	0.0846846	0.466	0.325	1	ZMAT2
MBNL2	0.11225	-0.193118	0.051	0.105	1	MBNL2
SP140	0.112335	0.207196	0.297	0.202	1	SP140
MPHOSPH8	0.112531	-0.193726	0.602	0.623	1	MPHOSPH8
SERGEF	0.112681	0.100447	0.11	0.053	1	SERGEF
PI4KA	0.112681	0.0931388	0.11	0.053	1	PI4KA
GON7	0.113068	0.0983367	0.212	0.132	1	GON7
SLC20A2	0.113207	-0.151028	0.051	0.105	1	SLC20A2
EPN1	0.113428	-0.158411	0.085	0.149	1	EPN1
LARP4B	0.113447	-0.0869139	0.068	0.132	1	LARP4B
METTL16	0.113484	0.139399	0.144	0.079	1	METTL16
RALB	0.113484	0.13072	0.144	0.079	1	RALB
MYL12B	0.113596	-0.0899083	0.924	0.939	1	MYL12B
KIF2A	0.113649	0.145044	0.483	0.351	1	KIF2A
DGKA	0.113672	-0.140024	0.127	0.202	1	DGKA
RSBN1L	0.113736	-0.183435	0.466	0.544	1	RSBN1L
SPG7	0.11378	0.112455	0.373	0.263	1	SPG7
PAK1IP1	0.114072	0.16735	0.178	0.105	1	PAK1IP1
SPECC1	0.114427	0.136822	0.212	0.132	1	SPECC1
SECISBP2	0.114451	0.129844	0.28	0.193	1	SECISBP2
DAXX	0.114459	0.163588	0.339	0.237	1	DAXX
ISCA1	0.114623	0.0832273	0.229	0.14	1	ISCA1
TOX	0.114659	-0.158431	0.153	0.228	1	TOX
DDX17	0.114705	-0.158438	0.856	0.86	1	DDX17
CLIP1	0.114728	-0.15268	0.212	0.307	1	CLIP1
PARL	0.114878	0.154784	0.254	0.175	1	PARL
TMEM30A	0.115033	-0.140238	0.119	0.193	1	TMEM30A
CNPPD1	0.115122	0.132688	0.144	0.079	1	CNPPD1
CCDC88B	0.115137	0.148395	0.263	0.175	1	CCDC88B
GHDC	0.11514	-0.134771	0.051	0.105	1	GHDC
ACAP1	0.115167	-0.128643	0.831	0.851	1	ACAP1
RAP1GDS1	0.115187	0.146464	0.237	0.158	1	RAP1GDS1
SMYD3	0.115203	0.0826669	0.136	0.07	1	SMYD3
OSBPL9	0.115496	-0.0691261	0.093	0.167	1	OSBPL9
SRSF1	0.116092	-0.178391	0.237	0.316	1	SRSF1
SERBP1	0.116195	-0.0605493	0.729	0.798	1	SERBP1
CAPN10	0.116276	0.041235	0.127	0.061	1	CAPN10
GGCX	0.116462	0.113384	0.11	0.053	1	GGCX
POU5F2	0.116462	0.0683574	0.11	0.053	1	POU5F2
YIPF6	0.116471	-0.135364	0.119	0.193	1	YIPF6
TBC1D31	0.116598	0.123906	0.237	0.149	1	TBC1D31
LMF2	0.116826	0.142536	0.203	0.123	1	LMF2
SSH2	0.116899	0.198543	0.263	0.184	1	SSH2
EXOSC4	0.117052	-0.226002	0.11	0.175	1	EXOSC4
RNF19B	0.117098	-0.106093	0.051	0.105	1	RNF19B
ARHGEF9	0.117248	0.129773	0.186	0.114	1	ARHGEF9
SLC9A3R1	0.117289	-0.226995	0.449	0.526	1	SLC9A3R1
PRNP	0.117559	0.0437639	0.195	0.114	1	PRNP
RETREG3	0.117618	-0.0713054	0.085	0.158	1	RETREG3
44081	0.117876	-0.124579	0.915	0.93	1	44081
SF3B1	0.118052	-0.182873	0.593	0.614	1	SF3B1
MRGBP	0.118088	-0.149503	0.051	0.105	1	MRGBP
HCST	0.118091	-0.0975967	0.924	0.912	1	HCST
PCNX1	0.118323	0.241067	0.178	0.114	1	PCNX1
TBCA	0.118999	-0.189797	0.492	0.579	1	TBCA
PSMD9	0.119048	0.130047	0.119	0.061	1	PSMD9
ZNF33B	0.119144	-0.125838	0.085	0.149	1	ZNF33B
LNPEP	0.119242	-0.209462	0.364	0.447	1	LNPEP
MRPS18C	0.11925	0.119439	0.347	0.246	1	MRPS18C
NPTN	0.119513	0.102486	0.169	0.096	1	NPTN
ANAPC10	0.119513	0.0929827	0.169	0.096	1	ANAPC10
MT-CO1	0.11958	0.0613577	1	1	1	MT-CO1
ODC1	0.119906	0.117583	0.169	0.096	1	ODC1
GMNN	0.119982	0.125413	0.119	0.061	1	GMNN
MXRA7	0.120218	-0.208735	0.119	0.184	1	MXRA7
TRIM13	0.120379	0.109351	0.271	0.175	1	TRIM13
RNPEPL1	0.120416	0.149123	0.5	0.395	1	RNPEPL1
CHMP2A	0.120471	0.120593	0.585	0.482	1	CHMP2A
N4BP1	0.12051	-0.283297	0.237	0.298	1	N4BP1
ASPH	0.120818	-0.120955	0.085	0.149	1	ASPH
SSH1	0.120829	-0.123616	0.093	0.158	1	SSH1
MFN1	0.121306	0.0641406	0.136	0.07	1	MFN1
CLEC2B	0.121595	0.167143	0.907	0.851	1	CLEC2B
HSPD1	0.121846	0.176724	0.449	0.351	1	HSPD1
CEBPG	0.121863	0.106699	0.144	0.079	1	CEBPG
ATAD2	0.121867	0.106241	0.203	0.123	1	ATAD2
RANGAP1	0.122198	0.0961905	0.136	0.07	1	RANGAP1
EMC7	0.122218	0.177772	0.356	0.263	1	EMC7
TRBC1	0.122404	-0.169212	0.492	0.605	1	TRBC1
USP8	0.122597	0.137587	0.373	0.272	1	USP8
LMBR1L	0.122969	-0.169202	0.127	0.202	1	LMBR1L
NUPL2	0.123132	0.0957199	0.28	0.193	1	NUPL2
LRCH4	0.123246	0.135907	0.186	0.114	1	LRCH4
44080	0.12392	0.201015	0.771	0.675	1	44080
HMGXB4	0.124079	0.0872994	0.203	0.123	1	HMGXB4
RALGAPA2	0.124248	0.131737	0.153	0.088	1	RALGAPA2
UBR7	0.124254	0.0976702	0.119	0.061	1	UBR7
IL12RB1	0.124302	0.0721799	0.169	0.096	1	IL12RB1
UQCRFS1	0.124532	0.165137	0.449	0.351	1	UQCRFS1
MRM3	0.124673	-0.168821	0.059	0.114	1	MRM3
DDAH2	0.12492	0.143854	0.229	0.14	1	DDAH2
APPBP2	0.125097	0.112924	0.153	0.088	1	APPBP2
METTL4	0.125114	-0.153191	0.102	0.167	1	METTL4
MRPL16	0.125229	0.174847	0.297	0.211	1	MRPL16
SEC61B	0.125319	0.13846	0.78	0.675	1	SEC61B
IL4R	0.125376	0.0920441	0.314	0.211	1	IL4R
HNRNPA1	0.125527	0.102799	0.805	0.728	1	HNRNPA1
CLK1	0.12582	-0.149561	0.237	0.325	1	CLK1
FAF2	0.126322	-0.119981	0.127	0.202	1	FAF2
BLCAP	0.126379	-0.245082	0.093	0.149	1	BLCAP
ELOB	0.126578	0.11624	0.788	0.693	1	ELOB
DCTN6	0.127074	0.143988	0.246	0.167	1	DCTN6
ATP10D	0.127196	-0.168872	0.076	0.132	1	ATP10D
MGAT1	0.127198	-0.209838	0.263	0.333	1	MGAT1
ZBED5	0.127438	0.182683	0.195	0.123	1	ZBED5
DHRS4-AS1	0.127659	0.0949144	0.119	0.061	1	DHRS4-AS1
CAPZA1	0.128126	0.130725	0.441	0.325	1	CAPZA1
SNRPA	0.128166	-0.175481	0.144	0.219	1	SNRPA
CHMP1B	0.128386	-0.102183	0.11	0.184	1	CHMP1B
MYL6B	0.128405	-0.142837	0.102	0.167	1	MYL6B
IFI44L	0.128587	0.119464	0.136	0.07	1	IFI44L
ACOT8	0.128668	-0.134918	0.059	0.114	1	ACOT8
HAVCR2	0.128822	0.266819	0.381	0.298	1	HAVCR2
PACS1	0.128903	-0.14923	0.237	0.325	1	PACS1
TPD52	0.128909	0.0951047	0.144	0.079	1	TPD52
MBD3	0.128978	0.136499	0.195	0.123	1	MBD3
ELP2	0.128978	-0.194017	0.127	0.193	1	ELP2
CCL5	0.129023	-0.150269	0.915	0.904	1	CCL5
SH2B3	0.129406	-0.10198	0.051	0.105	1	SH2B3
IARS	0.129496	0.158044	0.229	0.149	1	IARS
STK38L	0.129682	-0.161695	0.059	0.114	1	STK38L
SPOUT1	0.129754	0.134365	0.195	0.123	1	SPOUT1
HMGB1	0.129873	0.127496	0.941	0.947	1	HMGB1
OXSR1	0.130277	0.111497	0.186	0.114	1	OXSR1
EIF3I	0.130351	0.119779	0.568	0.439	1	EIF3I
METTL2A	0.130459	0.0295496	0.136	0.07	1	METTL2A
TNF	0.130475	-0.110818	0.051	0.105	1	TNF
DHPS	0.130905	-0.187099	0.169	0.246	1	DHPS
UHRF2	0.130933	-0.133353	0.093	0.158	1	UHRF2
CIB1	0.131095	0.107922	0.737	0.632	1	CIB1
WHAMM	0.13118	-0.088636	0.169	0.254	1	WHAMM
WDFY1	0.131403	0.0607187	0.136	0.07	1	WDFY1
ATPAF1	0.131403	0.0480002	0.136	0.07	1	ATPAF1
PFKP	0.131763	0.0258595	0.169	0.096	1	PFKP
GPX4	0.131778	-0.177437	0.695	0.763	1	GPX4
TCP1	0.132233	0.137399	0.381	0.281	1	TCP1
ATF4	0.13241	0.1622	0.347	0.246	1	ATF4
MED1	0.132613	0.112795	0.169	0.096	1	MED1
KAT2B	0.132762	-0.137736	0.059	0.114	1	KAT2B
CHFR	0.132881	0.112954	0.178	0.105	1	CHFR
GPR171	0.13289	-0.260416	0.331	0.386	1	GPR171
ZNF639	0.132892	0.126804	0.195	0.123	1	ZNF639
TP53RK	0.132979	0.16192	0.212	0.14	1	TP53RK
ZNF787	0.133401	-0.181025	0.161	0.237	1	ZNF787
FAM49B	0.133681	-0.151033	0.695	0.746	1	FAM49B
ARHGAP21	0.133802	-0.126558	0.059	0.114	1	ARHGAP21
UPF1	0.134046	0.0786781	0.212	0.132	1	UPF1
BEX4	0.134108	-0.191405	0.246	0.307	1	BEX4
43898	0.134267	0.0499028	0.136	0.07	1	43898
MED15	0.134442	0.0345473	0.161	0.088	1	MED15
SLAMF7	0.134474	0.145564	0.424	0.307	1	SLAMF7
MED19	0.134483	-0.147004	0.127	0.193	1	MED19
TMEM50A	0.134495	0.12061	0.669	0.518	1	TMEM50A
CKS2	0.134665	0.196335	0.136	0.079	1	CKS2
STIP1	0.134667	0.113251	0.305	0.211	1	STIP1
ZNF37A	0.134917	-0.15087	0.203	0.281	1	ZNF37A
PSTPIP1	0.135075	0.18045	0.39	0.298	1	PSTPIP1
WASHC2C	0.135899	-0.103577	0.059	0.114	1	WASHC2C
KLF10	0.135899	-0.123382	0.059	0.114	1	KLF10
PPP2R5A	0.136011	0.198149	0.195	0.132	1	PPP2R5A
CSNK1D	0.136166	0.134963	0.339	0.246	1	CSNK1D
TAF1	0.136224	-0.119794	0.093	0.158	1	TAF1
SNX5	0.136226	0.111277	0.297	0.202	1	SNX5
GDI2	0.136253	0.119365	0.424	0.325	1	GDI2
SGO2	0.136267	0.0917772	0.144	0.079	1	SGO2
PRCC	0.136267	0.0279208	0.144	0.079	1	PRCC
CHD6	0.136637	0.106459	0.246	0.167	1	CHD6
TRIM73	0.136785	0.124186	0.186	0.114	1	TRIM73
SNX19	0.136957	-0.130033	0.059	0.114	1	SNX19
LRRFIP2	0.137004	0.0936536	0.153	0.088	1	LRRFIP2
CFAP36	0.137087	-0.166569	0.11	0.175	1	CFAP36
DLGAP4	0.137101	0.14502	0.127	0.07	1	DLGAP4
MBNL1	0.137271	-0.170944	0.653	0.693	1	MBNL1
GK5	0.137802	-0.140998	0.102	0.167	1	GK5
STOM	0.13781	-0.191046	0.449	0.518	1	STOM
CDIP1	0.13794	0.0819709	0.178	0.105	1	CDIP1
ARL8B	0.137981	0.117724	0.161	0.096	1	ARL8B
ACTB	0.138031	0.0498414	1	1	1	ACTB
SF3B6	0.138074	-0.178248	0.534	0.588	1	SF3B6
CPEB4	0.138157	0.062194	0.144	0.079	1	CPEB4
YTHDC1	0.138467	-0.142109	0.271	0.36	1	YTHDC1
RAB6A	0.138654	0.0974086	0.271	0.184	1	RAB6A
GPATCH8	0.138775	0.156962	0.364	0.281	1	GPATCH8
DEAF1	0.138832	0.100358	0.119	0.061	1	DEAF1
ZNF143	0.138837	-0.176188	0.068	0.123	1	ZNF143
DCBLD1	0.139109	0.055977	0.144	0.079	1	DCBLD1
DTD1	0.139166	0.10921	0.229	0.149	1	DTD1
C6orf48	0.139271	-0.219732	0.407	0.456	1	C6orf48
C21orf91	0.139345	0.141436	0.195	0.123	1	C21orf91
PLIN3	0.139659	0.0882317	0.178	0.105	1	PLIN3
GLTP	0.140036	0.0197441	0.237	0.149	1	GLTP
RUNDC1	0.140169	-0.122014	0.059	0.114	1	RUNDC1
MRPL21	0.14037	0.0978153	0.28	0.184	1	MRPL21
CISD1	0.140775	0.0878939	0.263	0.175	1	CISD1
TGDS	0.140933	0.152583	0.136	0.079	1	TGDS
SGK3	0.141548	0.190236	0.102	0.053	1	SGK3
HIST2H2AC	0.141945	-0.104163	0.068	0.123	1	HIST2H2AC
ATP6V1H	0.141968	0.0990141	0.237	0.158	1	ATP6V1H
RPLP1	0.141972	0.0704576	1	1	1	RPLP1
NSMCE4A	0.142237	-0.183401	0.186	0.254	1	NSMCE4A
ASB8	0.142262	-0.250168	0.195	0.254	1	ASB8
JAML	0.142263	-0.120492	0.186	0.263	1	JAML
CREB3	0.142343	-0.0911432	0.059	0.114	1	CREB3
DPY30	0.142351	0.0946333	0.415	0.289	1	DPY30
HNRNPA0	0.142486	-0.184369	0.398	0.465	1	HNRNPA0
DRAP1	0.143219	0.12272	0.788	0.64	1	DRAP1
ITFG2	0.14356	0.094038	0.212	0.132	1	ITFG2
ITGAM	0.143701	0.181751	0.127	0.07	1	ITGAM
HSCB	0.143847	0.199179	0.102	0.053	1	HSCB
PNRC2	0.144049	0.059793	0.458	0.333	1	PNRC2
MYH9	0.144456	-0.129276	0.568	0.649	1	MYH9
NOTCH1	0.144463	-0.155847	0.203	0.289	1	NOTCH1
TTC33	0.144542	-0.0814935	0.059	0.114	1	TTC33
MARK3	0.144559	0.137915	0.297	0.211	1	MARK3
ACAT2	0.144754	0.128362	0.212	0.14	1	ACAT2
CARS2	0.145269	0.0657895	0.186	0.114	1	CARS2
PIGBOS1	0.145269	-0.129603	0.119	0.184	1	PIGBOS1
SMIM8	0.145894	0.0597579	0.153	0.088	1	SMIM8
PILRB	0.146147	0.0615933	0.28	0.184	1	PILRB
KAT6B	0.14621	0.197897	0.39	0.307	1	KAT6B
SRI	0.146303	0.127622	0.653	0.526	1	SRI
PRKRIP1	0.146392	0.127543	0.203	0.132	1	PRKRIP1
MRNIP	0.146768	-0.0763552	0.059	0.114	1	MRNIP
TGOLN2	0.147029	-0.173109	0.508	0.544	1	TGOLN2
MYCBP	0.14742	0.0703576	0.119	0.061	1	MYCBP
SLC27A2	0.147882	0.111326	0.127	0.07	1	SLC27A2
ARL4C	0.148045	-0.162877	0.729	0.746	1	ARL4C
AP2M1	0.14833	0.15842	0.508	0.421	1	AP2M1
OTUB1	0.148426	-0.139198	0.22	0.298	1	OTUB1
SLC25A36	0.148427	0.0765421	0.305	0.211	1	SLC25A36
CDK10	0.1485	-0.128097	0.11	0.175	1	CDK10
GALC	0.148531	0.142573	0.102	0.053	1	GALC
LAMTOR5	0.148549	0.140346	0.585	0.474	1	LAMTOR5
SPCS3	0.148574	0.170754	0.525	0.421	1	SPCS3
PTPN12	0.148773	-0.170894	0.119	0.184	1	PTPN12
ARFRP1	0.148852	-0.139441	0.144	0.211	1	ARFRP1
CCT2	0.148896	0.141462	0.415	0.316	1	CCT2
C6orf47	0.148913	0.103393	0.203	0.132	1	C6orf47
ETNK1	0.148925	-0.103793	0.136	0.211	1	ETNK1
SS18	0.14907	0.100662	0.246	0.167	1	SS18
PSMC4	0.14911	-0.154653	0.288	0.36	1	PSMC4
TENT2	0.149405	0.200123	0.229	0.158	1	TENT2
RNF13	0.14961	0.0909693	0.271	0.184	1	RNF13
IRF2BP2	0.14961	0.12194	0.271	0.184	1	IRF2BP2
FARSA	0.149659	0.0831622	0.186	0.114	1	FARSA
PRKAR2B	0.14972	0.124945	0.102	0.053	1	PRKAR2B
XPNPEP1	0.149767	0.0958428	0.153	0.088	1	XPNPEP1
PSD4	0.14981	0.0877743	0.322	0.219	1	PSD4
ZNHIT1	0.149814	0.0394757	0.508	0.36	1	ZNHIT1
IMMP1L	0.149919	0.0533898	0.144	0.079	1	IMMP1L
EPS8L2	0.150007	0.102967	0.127	0.07	1	EPS8L2
TLK2	0.150019	-0.20016	0.11	0.167	1	TLK2
ARPC4	0.150108	0.156551	0.602	0.474	1	ARPC4
UXS1	0.150516	0.150969	0.212	0.14	1	UXS1
SH2D1A	0.150841	-0.223442	0.356	0.412	1	SH2D1A
POLR2E	0.150841	0.137634	0.432	0.333	1	POLR2E
CDC26	0.150874	-0.153147	0.297	0.368	1	CDC26
SIGMAR1	0.150916	0.115534	0.102	0.053	1	SIGMAR1
ELP5	0.150921	0.158735	0.22	0.149	1	ELP5
TOLLIP	0.151175	0.165671	0.144	0.088	1	TOLLIP
DUT	0.151442	0.228858	0.339	0.254	1	DUT
NPC1	0.151589	-0.129048	0.068	0.123	1	NPC1
VPS13B	0.151864	0.0754707	0.119	0.061	1	VPS13B
PSMB2	0.151897	0.0720409	0.559	0.439	1	PSMB2
HNRNPA3	0.151959	0.155528	0.805	0.667	1	HNRNPA3
PHF14	0.152156	-0.180711	0.246	0.316	1	PHF14
ARMCX6	0.15257	-0.144866	0.153	0.219	1	ARMCX6
ETS1	0.152636	-0.176878	0.686	0.684	1	ETS1
DHX29	0.152638	0.10918	0.229	0.149	1	DHX29
ATG12	0.152874	0.039481	0.39	0.281	1	ATG12
ATG4B	0.153091	-0.0843282	0.093	0.158	1	ATG4B
COA3	0.153196	-0.186379	0.22	0.289	1	COA3
TPP1	0.153215	0.0885005	0.246	0.158	1	TPP1
HELLS	0.153601	0.217526	0.11	0.061	1	HELLS
EML4	0.153665	-0.192434	0.364	0.439	1	EML4
SFPQ	0.153868	0.111616	0.619	0.518	1	SFPQ
FAM120A	0.153873	-0.118536	0.153	0.228	1	FAM120A
FTSJ1	0.153938	0.0949253	0.102	0.053	1	FTSJ1
SERTAD2	0.154217	-0.154635	0.093	0.149	1	SERTAD2
MDC1	0.154548	0.0777054	0.102	0.053	1	MDC1
KDM3B	0.154664	0.109669	0.136	0.079	1	KDM3B
ANKRD44	0.154852	-0.221438	0.381	0.456	1	ANKRD44
SLC25A24	0.15494	0.0705509	0.178	0.105	1	SLC25A24
ZDHHC17	0.15522	-0.193604	0.093	0.149	1	ZDHHC17
MT-CO3	0.155733	0.0500775	1	1	1	MT-CO3
PRDX3	0.155765	-0.218931	0.136	0.193	1	PRDX3
ZC3H15	0.156267	-0.202196	0.432	0.482	1	ZC3H15
RPS6KA3	0.156463	0.165051	0.508	0.439	1	RPS6KA3
RYBP	0.156782	0.116211	0.136	0.079	1	RYBP
FAM98B	0.156782	0.0886985	0.136	0.079	1	FAM98B
LMBRD1	0.156784	-0.222686	0.161	0.219	1	LMBRD1
MYO19	0.157006	0.151434	0.102	0.053	1	MYO19
DPAGT1	0.157006	0.0984031	0.102	0.053	1	DPAGT1
BBS4	0.157006	0.0893063	0.102	0.053	1	BBS4
FBXL5	0.157073	-0.194831	0.11	0.167	1	FBXL5
MSMO1	0.157271	0.135159	0.144	0.088	1	MSMO1
DYNC1H1	0.157293	0.0850724	0.441	0.342	1	DYNC1H1
MED10	0.157369	0.0796076	0.5	0.377	1	MED10
NOP14	0.157848	0.11284	0.178	0.114	1	NOP14
SCAMP1	0.158246	0.102627	0.102	0.053	1	SCAMP1
LACTB2	0.158246	0.0911868	0.102	0.053	1	LACTB2
ME2	0.158707	-0.220752	0.237	0.298	1	ME2
RFC5	0.159429	-0.0999449	0.068	0.123	1	RFC5
HNRNPAB	0.15961	-0.181656	0.373	0.447	1	HNRNPAB
RPL22	0.159706	0.0761629	0.958	0.912	1	RPL22
OXA1L	0.159921	0.112976	0.212	0.14	1	OXA1L
RUVBL2	0.16012	0.0943962	0.102	0.053	1	RUVBL2
PSMB4	0.160202	0.127778	0.449	0.342	1	PSMB4
MTHFD2	0.160306	0.0620829	0.153	0.088	1	MTHFD2
CYC1	0.160843	-0.160224	0.263	0.342	1	CYC1
NUS1	0.161056	0.0141822	0.119	0.061	1	NUS1
DYNLT1	0.16115	0.114434	0.424	0.316	1	DYNLT1
XYLT1	0.161379	0.103288	0.102	0.053	1	XYLT1
ATG101	0.161394	-0.156685	0.169	0.237	1	ATG101
RBM10	0.161444	0.0634039	0.212	0.132	1	RBM10
CDK19	0.161724	-0.0966938	0.068	0.123	1	CDK19
SETD2	0.161749	-0.176986	0.305	0.368	1	SETD2
PRCP	0.161876	0.17071	0.11	0.061	1	PRCP
ZNF138	0.162011	0.116753	0.102	0.053	1	ZNF138
TOGARAM1	0.162011	0.110862	0.102	0.053	1	TOGARAM1
PARP12	0.162011	0.0881197	0.102	0.053	1	PARP12
H2AFY	0.162028	0.0965526	0.39	0.289	1	H2AFY
PTPN18	0.16222	0.158972	0.288	0.219	1	PTPN18
CD226	0.162269	0.177663	0.314	0.237	1	CD226
IDH3B	0.162305	-0.187628	0.246	0.316	1	IDH3B
SAMD9L	0.162604	0.124713	0.441	0.316	1	SAMD9L
NOP56	0.162797	0.110255	0.356	0.281	1	NOP56
PNN	0.162868	-0.165016	0.729	0.754	1	PNN
TMEM14A	0.162913	-0.0864136	0.127	0.193	1	TMEM14A
CD81	0.163021	0.141734	0.881	0.842	1	CD81
CALM2	0.163166	-0.101647	0.703	0.781	1	CALM2
MMADHC	0.163435	0.126021	0.305	0.219	1	MMADHC
SCLT1	0.163698	0.0760525	0.161	0.096	1	SCLT1
MEI1	0.163881	0.112137	0.169	0.105	1	MEI1
ANXA6	0.164061	0.0913153	0.483	0.36	1	ANXA6
HDGFL3	0.164301	0.126686	0.11	0.061	1	HDGFL3
RNF44	0.164368	0.123172	0.136	0.079	1	RNF44
LCORL	0.164391	0.0859393	0.127	0.07	1	LCORL
CHD3	0.164436	0.131555	0.246	0.167	1	CHD3
ORAI2	0.16463	0.139554	0.432	0.342	1	ORAI2
DPYD	0.164716	0.0773186	0.161	0.096	1	DPYD
NIPBL	0.164969	0.0953171	0.432	0.342	1	NIPBL
PITPNM1	0.165053	-0.113242	0.076	0.132	1	PITPNM1
IDI1	0.165204	0.0760259	0.441	0.351	1	IDI1
AKT1	0.165464	0.130537	0.28	0.193	1	AKT1
SMC6	0.165473	0.123146	0.178	0.114	1	SMC6
CD164	0.16566	-0.154516	0.602	0.623	1	CD164
BACH2	0.165843	0.0770887	0.102	0.053	1	BACH2
INPP4B	0.165843	0.0410042	0.102	0.053	1	INPP4B
DYNLT3	0.165848	0.139431	0.263	0.184	1	DYNLT3
CHD1	0.166096	0.0763065	0.297	0.211	1	CHD1
ATP5F1C	0.166185	0.11199	0.525	0.43	1	ATP5F1C
COMMD1	0.16626	0.114541	0.22	0.149	1	COMMD1
CELF2	0.166384	-0.128604	0.483	0.535	1	CELF2
PTPN1	0.166999	0.0680399	0.297	0.202	1	PTPN1
METTL6	0.167136	0.105883	0.102	0.053	1	METTL6
TM2D2	0.167368	-0.187664	0.11	0.167	1	TM2D2
EXOC7	0.167567	-0.196318	0.246	0.316	1	EXOC7
EVA1B	0.167805	-0.15962	0.195	0.272	1	EVA1B
BATF	0.167869	0.114714	0.288	0.202	1	BATF
SURF2	0.168035	0.119073	0.22	0.149	1	SURF2
ZNF141	0.16816	0.0266959	0.169	0.096	1	ZNF141
SSBP3	0.16816	-0.047253	0.102	0.167	1	SSBP3
DNMT3A	0.168318	0.089929	0.263	0.184	1	DNMT3A
PHF10	0.168374	-0.156726	0.11	0.167	1	PHF10
KIF1BP	0.168436	0.10735	0.102	0.053	1	KIF1BP
SLC8B1	0.168436	0.0723426	0.102	0.053	1	SLC8B1
BTAF1	0.16846	-0.114625	0.076	0.132	1	BTAF1
DPP7	0.168707	-0.177373	0.441	0.491	1	DPP7
CDC37L1	0.168825	0.134616	0.136	0.079	1	CDC37L1
ATP6V0E1	0.169118	0.0986661	0.831	0.772	1	ATP6V0E1
CD44	0.169127	-0.169271	0.763	0.746	1	CD44
RSRC1	0.169247	0.15468	0.297	0.211	1	RSRC1
LAMTOR4	0.169266	0.132469	0.636	0.561	1	LAMTOR4
SPTLC2	0.169563	0.128162	0.263	0.184	1	SPTLC2
VIM-AS1	0.169778	-0.178528	0.093	0.149	1	VIM-AS1
GTF2A2	0.170058	0.154116	0.432	0.351	1	GTF2A2
SH3BGRL3	0.170178	0.0741691	0.992	0.991	1	SH3BGRL3
BCL10	0.1704	-0.141042	0.11	0.167	1	BCL10
MAGEH1	0.171115	0.15057	0.144	0.088	1	MAGEH1
IFT43	0.171156	0.191985	0.119	0.07	1	IFT43
SERTAD1	0.171371	0.0691408	0.127	0.07	1	SERTAD1
ALG8	0.171447	-0.151308	0.102	0.158	1	ALG8
FCER1G	0.171519	0.0978319	0.898	0.789	1	FCER1G
SFT2D2	0.171663	0.0845207	0.254	0.167	1	SFT2D2
CIR1	0.171842	-0.206891	0.398	0.43	1	CIR1
GNPDA1	0.171932	0.0804432	0.169	0.105	1	GNPDA1
MTR	0.171973	0.0386346	0.161	0.096	1	MTR
MDM2	0.172165	-0.149225	0.136	0.202	1	MDM2
SMIM15	0.172195	-0.176177	0.246	0.307	1	SMIM15
PHAX	0.172241	-0.233684	0.229	0.289	1	PHAX
EHD4	0.172381	0.0730219	0.102	0.053	1	EHD4
RNF139	0.172381	0.0702965	0.102	0.053	1	RNF139
TMEM160	0.172531	0.141801	0.559	0.456	1	TMEM160
IDNK	0.172549	-0.175032	0.059	0.105	1	IDNK
SP3	0.172634	0.0606054	0.373	0.263	1	SP3
PTEN	0.173184	-0.0911042	0.203	0.281	1	PTEN
KIAA0232	0.17327	-0.169351	0.136	0.193	1	KIAA0232
MALSU1	0.173329	-0.164134	0.144	0.202	1	MALSU1
TOX4	0.173658	0.101914	0.356	0.263	1	TOX4
SNRPC	0.174246	0.097265	0.441	0.342	1	SNRPC
HDAC5	0.174255	-0.066041	0.076	0.132	1	HDAC5
FUT11	0.174255	-0.123069	0.076	0.132	1	FUT11
ANXA2	0.174439	0.110287	0.483	0.386	1	ANXA2
CLN8	0.174523	0.110814	0.136	0.079	1	CLN8
TMEM243	0.174735	-0.160036	0.322	0.386	1	TMEM243
EAPP	0.174837	-0.122897	0.288	0.368	1	EAPP
TMUB1	0.174875	-0.169619	0.153	0.211	1	TMUB1
ASXL2	0.175039	0.0961733	0.263	0.184	1	ASXL2
LINC002481	0.175155	0.0757833	0.161	0.096	1	LINC002481
EDF1	0.175373	-0.107454	0.78	0.807	1	EDF1
ADK	0.175389	0.088167	0.178	0.114	1	ADK
LARS	0.175452	0.0570527	0.297	0.202	1	LARS
ARAP2	0.175536	0.17494	0.517	0.43	1	ARAP2
CPOX	0.175553	0.0993776	0.11	0.061	1	CPOX
FNTA	0.175557	0.0569227	0.347	0.246	1	FNTA
ZNF146	0.176481	-0.0711035	0.102	0.167	1	ZNF146
CEP44	0.176614	-0.089777	0.076	0.132	1	CEP44
ELF1	0.176862	-0.120728	0.415	0.5	1	ELF1
TMEM170A	0.176941	0.112756	0.237	0.167	1	TMEM170A
VPS36	0.177273	-0.173759	0.314	0.36	1	VPS36
IBTK	0.177836	0.116462	0.237	0.167	1	IBTK
EIF4A1	0.178021	0.109029	0.381	0.289	1	EIF4A1
SC5D	0.17813	0.110175	0.11	0.061	1	SC5D
METRN	0.178161	0.085396	0.169	0.105	1	METRN
NDUFA9	0.178721	0.112241	0.297	0.219	1	NDUFA9
THG1L	0.178938	0.0948076	0.144	0.088	1	THG1L
SRPK2	0.179	-0.119601	0.314	0.386	1	SRPK2
WDFY2	0.179109	0.058198	0.102	0.053	1	WDFY2
EEF1AKMT1	0.179109	0.0581014	0.102	0.053	1	EEF1AKMT1
TMEM248	0.179248	0.109362	0.305	0.219	1	TMEM248
OSBP	0.179477	-0.165803	0.119	0.175	1	OSBP
MRPL48	0.179478	0.11084	0.178	0.114	1	MRPL48
CNN2	0.179544	-0.214182	0.229	0.289	1	CNN2
APOL3	0.179588	0.0750873	0.288	0.211	1	APOL3
RPS2	0.179822	0.0670505	1	1	1	RPS2
GGCT	0.179839	0.0327328	0.203	0.132	1	GGCT
SYNRG	0.179845	0.0670099	0.551	0.439	1	SYNRG
ENO1	0.179891	0.162567	0.729	0.658	1	ENO1
DUSP11	0.180054	0.0930333	0.212	0.14	1	DUSP11
TRIP11	0.180113	0.0917375	0.373	0.281	1	TRIP11
ZDHHC5	0.180197	0.165479	0.153	0.096	1	ZDHHC5
ST3GAL5	0.180275	0.100224	0.169	0.105	1	ST3GAL5
CHCHD1	0.180418	0.114314	0.449	0.351	1	CHCHD1
NUTM2A-AS1	0.180478	0.0487105	0.102	0.053	1	NUTM2A-AS1
BAP1	0.180478	0.0311338	0.102	0.053	1	BAP1
BAD	0.1805	0.0447398	0.237	0.158	1	BAD
CASP1	0.180878	0.122488	0.322	0.237	1	CASP1
BARD1	0.180993	0.161358	0.119	0.07	1	BARD1
GRAP2	0.181018	0.0573027	0.127	0.07	1	GRAP2
TGFB1	0.181064	-0.0886036	0.678	0.728	1	TGFB1
RBBP5	0.181548	0.132129	0.178	0.114	1	RBBP5
CLSTN3	0.181549	0.0841877	0.136	0.079	1	CLSTN3
TUFM	0.181682	0.0941433	0.568	0.43	1	TUFM
ANXA5	0.181785	0.132303	0.314	0.228	1	ANXA5
RHOG	0.181797	-0.174644	0.305	0.368	1	RHOG
SLC25A42	0.181855	0.0720279	0.102	0.053	1	SLC25A42
PUSL1	0.181855	0.0698033	0.102	0.053	1	PUSL1
TYMS	0.182047	0.240746	0.11	0.061	1	TYMS
RMND1	0.182066	-0.105997	0.085	0.14	1	RMND1
ECI2	0.182104	0.0726644	0.297	0.202	1	ECI2
C4orf3	0.182483	0.176363	0.729	0.658	1	C4orf3
C1GALT1C1	0.182782	0.0831844	0.203	0.132	1	C1GALT1C1
MRPL41	0.182925	-0.148965	0.458	0.535	1	MRPL41
EIF1AD	0.183239	0.0580999	0.102	0.053	1	EIF1AD
PSEN2	0.183239	0.0278848	0.102	0.053	1	PSEN2
TPRG1L	0.183367	0.115982	0.11	0.061	1	TPRG1L
ZDHHC3	0.183479	0.0816386	0.169	0.105	1	ZDHHC3
DCTPP1	0.183558	0.151313	0.28	0.211	1	DCTPP1
CCDC167	0.183582	0.070083	0.263	0.175	1	CCDC167
SNAPIN	0.183784	-0.226001	0.212	0.263	1	SNAPIN
RRP15	0.183834	0.15723	0.127	0.079	1	RRP15
CCDC82	0.184484	-0.165232	0.288	0.342	1	CCDC82
SELL	0.184646	0.189536	0.288	0.211	1	SELL
CNP	0.184686	0.104751	0.144	0.088	1	CNP
PRPSAP1	0.184763	0.0836921	0.203	0.132	1	PRPSAP1
CCDC124	0.18487	-0.154964	0.144	0.202	1	CCDC124
ARL14EP	0.185271	-0.126692	0.28	0.351	1	ARL14EP
USP1	0.185495	-0.184468	0.195	0.254	1	USP1
C15orf40	0.185676	0.0889014	0.297	0.211	1	C15orf40
KANSL3	0.185865	-0.124165	0.059	0.105	1	KANSL3
ARL6IP5	0.186329	-0.139169	0.78	0.789	1	ARL6IP5
NAAA	0.186349	0.0817432	0.136	0.079	1	NAAA
NDUFS1	0.186761	0.0408878	0.203	0.132	1	NDUFS1
COPB1	0.186763	-0.174942	0.364	0.43	1	COPB1
PSMD11	0.186768	-0.254049	0.288	0.36	1	PSMD11
MTIF2	0.186791	-0.100604	0.085	0.14	1	MTIF2
YTHDC2	0.186847	-0.179975	0.144	0.202	1	YTHDC2
PMF1	0.187232	0.0991426	0.415	0.316	1	PMF1
MAPKAPK3	0.187344	0.0987533	0.203	0.14	1	MAPKAPK3
DPEP2	0.18737	0.0982705	0.11	0.061	1	DPEP2
MBOAT7	0.18737	0.0674808	0.11	0.061	1	MBOAT7
KIAA0355	0.18737	0.0666189	0.11	0.061	1	KIAA0355
POLR2B	0.187761	0.0803169	0.441	0.333	1	POLR2B
REL	0.188207	-0.157516	0.415	0.465	1	REL
KLRC1	0.188263	0.16289	0.729	0.711	1	KLRC1
CDC42SE2	0.188392	0.0938292	0.712	0.553	1	CDC42SE2
PPP1R16B	0.188499	0.0886266	0.22	0.149	1	PPP1R16B
MED8	0.188608	0.104883	0.195	0.132	1	MED8
IGFBP2	0.188718	0.0502446	0.11	0.061	1	IGFBP2
WDR59	0.188767	0.153835	0.127	0.079	1	WDR59
VEZT	0.188783	0.0237082	0.136	0.079	1	VEZT
TMEM60	0.188827	-0.119815	0.161	0.228	1	TMEM60
CLDN15	0.188855	0.044834	0.102	0.053	1	CLDN15
FHL3	0.18908	-0.177958	0.195	0.254	1	FHL3
HADHA	0.189133	0.0830782	0.466	0.377	1	HADHA
LINC00861	0.189217	-0.180146	0.28	0.333	1	LINC00861
EIF3E	0.189275	-0.138227	0.636	0.675	1	EIF3E
LCMT1	0.189341	0.131556	0.203	0.14	1	LCMT1
PURA	0.189363	-0.165721	0.356	0.439	1	PURA
CCDC90B	0.189598	-0.159298	0.246	0.307	1	CCDC90B
ANP32A	0.189622	0.0805672	0.542	0.43	1	ANP32A
TESPA1	0.189783	0.104901	0.229	0.158	1	TESPA1
MAU2	0.190005	-0.12306	0.059	0.105	1	MAU2
DGAT1	0.190278	0.0468322	0.102	0.053	1	DGAT1
SH3BGRL	0.190573	-0.188633	0.492	0.526	1	SH3BGRL
UBL4A	0.190742	0.0929474	0.229	0.158	1	UBL4A
RBM17	0.190777	0.118368	0.466	0.36	1	RBM17
GPM6B	0.191086	0.0331822	0.178	0.114	1	GPM6B
U2SURP	0.191222	0.113364	0.517	0.404	1	U2SURP
LBR	0.191403	-0.154417	0.466	0.509	1	LBR
NAA30	0.191437	0.0929465	0.11	0.061	1	NAA30
MT-ND3	0.191857	0.0687733	1	1	1	MT-ND3
PRKCH	0.192	-0.229759	0.407	0.43	1	PRKCH
BORCS6	0.192206	-0.15	0.136	0.193	1	BORCS6
MATK	0.192375	-0.173718	0.746	0.754	1	MATK
FAM208A	0.19243	0.161323	0.288	0.211	1	FAM208A
SLC35F6	0.192555	0.130164	0.119	0.07	1	SLC35F6
NDE1	0.192789	-0.166191	0.11	0.167	1	NDE1
PCBD1	0.192802	-0.0936689	0.059	0.105	1	PCBD1
PINK1	0.192806	0.0809084	0.11	0.061	1	PINK1
RAB22A	0.192873	-0.17665	0.144	0.202	1	RAB22A
KIAA0100	0.192962	0.0800846	0.144	0.088	1	KIAA0100
CEBPZ	0.193141	0.120799	0.271	0.193	1	CEBPZ
CLCN3	0.193209	0.0857745	0.186	0.123	1	CLCN3
MRPS35	0.193447	-0.116238	0.102	0.158	1	MRPS35
GABARAPL2	0.193541	0.0676616	0.593	0.491	1	GABARAPL2
EXOSC8	0.19356	0.142758	0.22	0.158	1	EXOSC8
XIAP	0.193565	0.0272721	0.263	0.175	1	XIAP
CUL4A	0.193722	-0.160001	0.085	0.132	1	CUL4A
YBEY	0.194037	0.116688	0.161	0.105	1	YBEY
DBNL	0.194112	-0.138683	0.271	0.342	1	DBNL
DUSP12	0.194166	0.0940044	0.144	0.088	1	DUSP12
YPEL3	0.194257	-0.210412	0.686	0.684	1	YPEL3
KAT6A	0.194348	0.134436	0.322	0.246	1	KAT6A
KRAS	0.194427	0.101278	0.398	0.307	1	KRAS
RGS16	0.194748	0.211557	0.169	0.114	1	RGS16
CDKN1B	0.194846	-0.148417	0.237	0.298	1	CDKN1B
TMEM183A	0.195019	0.0586999	0.153	0.096	1	TMEM183A
FKBP5	0.195071	0.141946	0.127	0.079	1	FKBP5
RUNX2	0.195189	-0.130959	0.068	0.114	1	RUNX2
SRPRA	0.195311	-0.204303	0.271	0.333	1	SRPRA
LRRC47	0.195629	-0.104176	0.059	0.105	1	LRRC47
TMF1	0.195647	-0.114201	0.381	0.447	1	TMF1
TATDN1	0.19599	-0.147948	0.119	0.175	1	TATDN1
ARRDC3	0.196022	-0.202729	0.161	0.219	1	ARRDC3
TRIM24	0.196195	0.0814897	0.153	0.096	1	TRIM24
CCT4	0.196285	0.12739	0.475	0.386	1	CCT4
TRA2A	0.196356	0.101885	0.254	0.184	1	TRA2A
DPP8	0.196393	0.160717	0.263	0.193	1	DPP8
AHCYL1	0.196454	0.152662	0.203	0.14	1	AHCYL1
AIP	0.196486	0.0854996	0.534	0.421	1	AIP
PPP1R11	0.196772	0.0620823	0.246	0.167	1	PPP1R11
DUSP16	0.196959	0.0625758	0.11	0.061	1	DUSP16
BCKDK	0.196959	0.0493524	0.11	0.061	1	BCKDK
TOMM7	0.197144	0.142217	0.915	0.833	1	TOMM7
TNFAIP8L1	0.197546	-0.151906	0.076	0.123	1	TNFAIP8L1
NR2C2	0.197914	-0.097324	0.068	0.114	1	NR2C2
MSANTD3	0.198358	0.0666388	0.11	0.061	1	MSANTD3
SACS	0.198358	0.0556549	0.11	0.061	1	SACS
CRYL1	0.198486	-0.0947673	0.059	0.105	1	CRYL1
RAB8A	0.198897	-0.105543	0.39	0.465	1	RAB8A
SLC25A45	0.198925	0.111828	0.246	0.175	1	SLC25A45
CCNT1	0.198926	0.118151	0.127	0.079	1	CCNT1
TRAPPC12	0.199038	0.0346965	0.144	0.088	1	TRAPPC12
YWHAB	0.199095	0.0998059	0.907	0.825	1	YWHAB
DERL2	0.199101	0.11356	0.373	0.281	1	DERL2
ISCA2	0.199173	-0.130097	0.195	0.263	1	ISCA2
PDHB	0.199549	-0.145637	0.22	0.281	1	PDHB
TLE4	0.199646	0.188087	0.288	0.219	1	TLE4
NRAS	0.199845	0.0190656	0.161	0.096	1	NRAS
GOT2	0.199926	-0.0984845	0.059	0.105	1	GOT2
VIM	0.199964	0.16174	0.89	0.877	1	VIM
ZNF106	0.200115	0.117406	0.322	0.237	1	ZNF106
ABHD17B	0.200427	-0.151101	0.119	0.175	1	ABHD17B
FGR	0.200427	-0.162684	0.119	0.175	1	FGR
RPS26	0.200451	0.0951702	0.856	0.789	1	RPS26
NONO	0.200526	0.0233932	0.441	0.325	1	NONO
TMEM161B	0.200559	0.115799	0.119	0.07	1	TMEM161B
XRCC5	0.20063	0.163127	0.695	0.632	1	XRCC5
GYG1	0.200634	0.121447	0.39	0.298	1	GYG1
SLC35E2B	0.200666	-0.117509	0.068	0.114	1	SLC35E2B
KBTBD2	0.201507	0.08287	0.144	0.088	1	KBTBD2
CTSA	0.201528	0.138213	0.424	0.325	1	CTSA
HSD17B11	0.201816	0.0888804	0.246	0.175	1	HSD17B11
NLRC3	0.201856	-0.125564	0.246	0.316	1	NLRC3
SH2D2A	0.201956	0.182684	0.432	0.342	1	SH2D2A
NAPEPLD	0.202053	-0.134754	0.068	0.114	1	NAPEPLD
ATG3	0.202097	0.14933	0.237	0.175	1	ATG3
TMIGD2	0.202153	-0.184582	0.39	0.439	1	TMIGD2
GTF2IRD2	0.202598	0.0725432	0.11	0.061	1	GTF2IRD2
ZFAND2A	0.202598	0.0626808	0.11	0.061	1	ZFAND2A
UBA7	0.202598	0.0493997	0.11	0.061	1	UBA7
NUDT16L1	0.202634	0.0249744	0.28	0.193	1	NUDT16L1
RALGAPA1	0.202724	0.0275334	0.297	0.202	1	RALGAPA1
MFSD8	0.202804	-0.126438	0.102	0.158	1	MFSD8
LEPROTL1	0.202869	-0.211522	0.585	0.614	1	LEPROTL1
PLEKHJ1	0.20309	0.0340487	0.339	0.237	1	PLEKHJ1
MDN1	0.20328	0.0982597	0.119	0.07	1	MDN1
DGCR6L	0.203324	0.0421305	0.347	0.254	1	DGCR6L
STIM2	0.203974	0.0994404	0.28	0.211	1	STIM2
HIRIP3	0.203998	0.113844	0.144	0.088	1	HIRIP3
SLC25A38	0.204101	0.0612832	0.212	0.14	1	SLC25A38
PIGF	0.204152	0.126158	0.127	0.079	1	PIGF
PGM1	0.204189	-0.158899	0.076	0.123	1	PGM1
AC025164.1	0.204342	-0.165446	0.195	0.263	1	AC025164.1
ATP6V1E1	0.204549	0.0884165	0.229	0.158	1	ATP6V1E1
PHF20	0.204567	-0.205408	0.288	0.333	1	PHF20
SMIM20	0.204917	-0.154239	0.119	0.167	1	SMIM20
ZC3H13	0.205017	-0.17192	0.356	0.404	1	ZC3H13
EIF4G3	0.205158	0.0844763	0.271	0.193	1	EIF4G3
MAPK9	0.205475	0.103006	0.127	0.079	1	MAPK9
ARMT1	0.205616	-0.0973249	0.093	0.149	1	ARMT1
CNPY4	0.205763	-0.124474	0.059	0.105	1	CNPY4
CISD3	0.20585	0.0949632	0.263	0.184	1	CISD3
SMC3	0.205928	0.051241	0.576	0.465	1	SMC3
PLEKHM2	0.206028	0.101913	0.119	0.07	1	PLEKHM2
SNRNP70	0.206348	0.0907797	0.364	0.281	1	SNRNP70
ZNF770	0.20647	0.048298	0.237	0.158	1	ZNF770
RTF2	0.206602	0.150585	0.466	0.395	1	RTF2
TENT4B	0.207014	0.110091	0.153	0.096	1	TENT4B
TAF1B	0.207083	0.128231	0.178	0.123	1	TAF1B
TADA2B	0.207241	-0.0891255	0.059	0.105	1	TADA2B
NIFK-AS1	0.207289	-0.119059	0.169	0.237	1	NIFK-AS1
RASSF3	0.207412	0.0848779	0.119	0.07	1	RASSF3
RIOK3	0.207682	-0.0866856	0.195	0.263	1	RIOK3
SRBD1	0.207777	0.0588257	0.144	0.088	1	SRBD1
CRK	0.207793	-0.130467	0.085	0.132	1	CRK
MPHOSPH9	0.208006	0.172304	0.212	0.149	1	MPHOSPH9
CCNK	0.208006	0.158256	0.212	0.149	1	CCNK
RAD23A	0.208137	0.0768106	0.466	0.377	1	RAD23A
GOLGB1	0.208556	-0.147409	0.407	0.456	1	GOLGB1
FBXW2	0.208648	0.0400273	0.22	0.149	1	FBXW2
NCOA7	0.208681	0.0624383	0.246	0.175	1	NCOA7
THAP11	0.208703	0.0319975	0.203	0.132	1	THAP11
ZRANB1	0.208803	0.0788951	0.119	0.07	1	ZRANB1
RPA1	0.209074	0.0905921	0.186	0.123	1	RPA1
ACTL6A	0.209297	-0.128973	0.136	0.193	1	ACTL6A
RAB37	0.209356	-0.12912	0.237	0.307	1	RAB37
LTA4H	0.209589	-0.133852	0.153	0.211	1	LTA4H
AMD1	0.209675	0.0823882	0.246	0.175	1	AMD1
DPM1	0.209675	0.074911	0.246	0.175	1	DPM1
KPNA3	0.209695	0.0754393	0.22	0.149	1	KPNA3
EXOSC7	0.209695	-0.185782	0.161	0.211	1	EXOSC7
PFDN4	0.209719	0.0803124	0.263	0.184	1	PFDN4
EHBP1	0.210221	-0.0726233	0.059	0.105	1	EHBP1
GAB3	0.210401	-0.117118	0.136	0.193	1	GAB3
PBX2	0.21052	-0.101084	0.068	0.114	1	PBX2
NAGPA	0.21052	-0.113984	0.068	0.114	1	NAGPA
YTHDF3	0.21052	-0.132067	0.068	0.114	1	YTHDF3
SUZ12	0.210592	0.10297	0.356	0.263	1	SUZ12
RTCA	0.21065	-0.133815	0.153	0.211	1	RTCA
NOL4L	0.210745	0.0589031	0.22	0.149	1	NOL4L
DEXI	0.210954	0.095166	0.195	0.132	1	DEXI
ATP2A2	0.210954	0.072034	0.195	0.132	1	ATP2A2
SURF1	0.210971	0.0201638	0.322	0.228	1	SURF1
SAMD3	0.211174	-0.212112	0.5	0.553	1	SAMD3
SLC39A10	0.211241	0.0996716	0.483	0.395	1	SLC39A10
PRPF4B	0.211252	-0.204548	0.441	0.474	1	PRPF4B
SDHD	0.211486	-0.191439	0.339	0.368	1	SDHD
HVCN1	0.211605	0.0903152	0.119	0.07	1	HVCN1
GOLIM4	0.21163	0.123876	0.161	0.105	1	GOLIM4
EFCAB14	0.211981	0.106876	0.331	0.254	1	EFCAB14
TSTA3	0.212238	-0.201965	0.254	0.316	1	TSTA3
TYMP	0.212279	0.19372	0.5	0.421	1	TYMP
SNRNP25	0.212615	0.155129	0.203	0.149	1	SNRNP25
GNGT2	0.212747	0.0590361	0.11	0.061	1	GNGT2
SETX	0.212985	-0.17864	0.339	0.404	1	SETX
TPGS1	0.213005	-0.184788	0.246	0.298	1	TPGS1
ZNF609	0.213089	-0.142813	0.085	0.132	1	ZNF609
RTF1	0.213208	0.0310302	0.441	0.333	1	RTF1
SKI	0.213209	0.0896532	0.153	0.096	1	SKI
MRPL45	0.213232	-0.0512436	0.059	0.105	1	MRPL45
LENG8	0.2135	-0.148288	0.195	0.263	1	LENG8
SUMO3	0.213736	0.126433	0.347	0.263	1	SUMO3
BECN1	0.21406	0.0817429	0.161	0.105	1	BECN1
SPCS2	0.214124	-0.117621	0.686	0.719	1	SPCS2
ISOC2	0.214192	0.045434	0.203	0.132	1	ISOC2
BAZ1A	0.214302	-0.223671	0.22	0.272	1	BAZ1A
BCCIP	0.214419	0.148276	0.144	0.096	1	BCCIP
HSBP1L1	0.214434	0.0812844	0.119	0.07	1	HSBP1L1
ATF6B	0.214674	0.0268184	0.347	0.254	1	ATF6B
KDM5A	0.214895	-0.203715	0.407	0.456	1	KDM5A
GTF2E2	0.215152	-0.120995	0.076	0.123	1	GTF2E2
TTC37	0.215302	0.0190086	0.203	0.132	1	TTC37
DLD	0.215332	-0.117337	0.127	0.184	1	DLD
TMEM131	0.215487	0.054657	0.144	0.088	1	TMEM131
MT-ND4	0.215502	0.0463327	1	1	1	MT-ND4
TRMU	0.215724	0.0686933	0.153	0.096	1	TRMU
ZBTB11	0.215747	-0.146457	0.186	0.246	1	ZBTB11
SCAI	0.215858	0.0374289	0.119	0.07	1	SCAI
RNF114	0.215982	-0.158354	0.136	0.193	1	RNF114
CCZ1	0.21601	-0.153647	0.153	0.211	1	CCZ1
ANKRD39	0.216548	0.134817	0.22	0.158	1	ANKRD39
MAP3K8	0.216663	0.170067	0.169	0.114	1	MAP3K8
RIT1	0.216746	-0.142225	0.169	0.228	1	RIT1
LSM7	0.216869	0.112363	0.559	0.5	1	LSM7
CLPX	0.217061	0.0744471	0.186	0.123	1	CLPX
MAP4K5	0.217207	0.0537403	0.11	0.061	1	MAP4K5
BANP	0.21729	0.101767	0.119	0.07	1	BANP
MAD2L1	0.21729	0.057661	0.119	0.07	1	MAD2L1
NECAP1	0.218406	-0.173089	0.144	0.202	1	NECAP1
MGA	0.218658	0.181703	0.195	0.14	1	MGA
IPO5	0.218728	0.0313508	0.119	0.07	1	IPO5
CPNE1	0.218928	-0.17748	0.407	0.456	1	CPNE1
ELL	0.219039	0.112787	0.127	0.079	1	ELL
RNASEH2B	0.219195	0.108189	0.331	0.254	1	RNASEH2B
UBL3	0.219241	-0.0668079	0.068	0.114	1	UBL3
TYK2	0.219371	-0.128257	0.076	0.123	1	TYK2
MRPL55	0.219435	-0.129567	0.195	0.263	1	MRPL55
TXNL1	0.219599	-0.167601	0.373	0.412	1	TXNL1
ZNF524	0.219756	-0.162741	0.161	0.219	1	ZNF524
TDP2	0.219799	0.111591	0.178	0.123	1	TDP2
APH1A	0.220087	0.0344523	0.297	0.211	1	APH1A
ATP1B1	0.220173	0.070406	0.119	0.07	1	ATP1B1
SDE2	0.220279	0.0919058	0.169	0.114	1	SDE2
NRBP1	0.220682	0.0777565	0.271	0.193	1	NRBP1
LAMP1	0.220836	-0.161741	0.297	0.36	1	LAMP1
IST1	0.22084	-0.221018	0.186	0.237	1	IST1
IL32	0.221011	0.1481	0.686	0.632	1	IL32
COA5	0.221298	0.161336	0.237	0.175	1	COA5
PLCB1	0.221472	0.10733	0.161	0.105	1	PLCB1
MCFD2	0.221494	0.0957711	0.169	0.114	1	MCFD2
SELENOT	0.22152	0.0492771	0.593	0.465	1	SELENOT
FLOT1	0.221764	0.131321	0.356	0.281	1	FLOT1
ERH	0.221818	0.0896562	0.695	0.535	1	ERH
DHRS1	0.222067	-0.158999	0.093	0.14	1	DHRS1
ZFPM1	0.222178	0.15227	0.144	0.096	1	ZFPM1
SPPL3	0.222217	-0.105132	0.076	0.123	1	SPPL3
MT1X	0.222854	0.0214292	0.28	0.193	1	MT1X
LSR	0.22323	0.0969067	0.102	0.061	1	LSR
BTBD2	0.223257	0.0464307	0.11	0.061	1	BTBD2
SPTLC1	0.223326	0.113392	0.169	0.114	1	SPTLC1
XIST	0.22339	0.063611	0.763	0.693	1	XIST
INTS5	0.2234	0.0423323	0.144	0.088	1	INTS5
FKBP11	0.223612	-0.0709322	0.271	0.342	1	FKBP11
TSC1	0.223698	-0.0753006	0.068	0.114	1	TSC1
MSN	0.223764	-0.063897	0.754	0.833	1	MSN
APTX	0.223787	0.101202	0.136	0.088	1	APTX
UHMK1	0.224013	0.121611	0.28	0.211	1	UHMK1
BIVM	0.224014	-0.024999	0.059	0.105	1	BIVM
NUDT4	0.224081	0.0274482	0.186	0.123	1	NUDT4
MRPL54	0.224095	0.097768	0.534	0.447	1	MRPL54
CCS	0.224173	-0.167175	0.153	0.202	1	CCS
CFDP1	0.224255	0.172256	0.331	0.254	1	CFDP1
GABARAPL1	0.224413	-0.146873	0.246	0.307	1	GABARAPL1
AKIRIN1	0.224446	0.136849	0.237	0.175	1	AKIRIN1
RBM5	0.224554	-0.0852488	0.246	0.316	1	RBM5
ANKH	0.224668	0.107687	0.186	0.132	1	ANKH
SNRPG	0.224727	0.132788	0.542	0.474	1	SNRPG
TSEN15	0.22487	0.0564053	0.237	0.167	1	TSEN15
ENY2	0.225344	0.0544492	0.492	0.386	1	ENY2
HNRNPUL2	0.225361	-0.0998218	0.085	0.132	1	HNRNPUL2
UBE2D3	0.22541	-0.119173	0.669	0.684	1	UBE2D3
PA2G4	0.225622	0.116095	0.576	0.509	1	PA2G4
SF3A2	0.225713	0.0717353	0.195	0.132	1	SF3A2
TOR1AIP2	0.225766	-0.160057	0.169	0.228	1	TOR1AIP2
RAB1A	0.225904	-0.091538	0.11	0.167	1	RAB1A
UMPS	0.225998	0.0441825	0.153	0.096	1	UMPS
MAFG	0.226022	0.0765924	0.119	0.07	1	MAFG
ZNF561	0.226705	-0.0704717	0.068	0.114	1	ZNF561
RAC1	0.226735	0.0597272	0.703	0.596	1	RAC1
UFM1	0.226921	-0.173595	0.254	0.307	1	UFM1
FUCA1	0.227007	0.0825123	0.237	0.167	1	FUCA1
CEP57	0.227131	0.0821604	0.347	0.272	1	CEP57
ANKRD13A	0.227307	0.0561983	0.153	0.096	1	ANKRD13A
ERP29	0.227392	0.0984258	0.678	0.579	1	ERP29
HMGXB3	0.227434	-0.149291	0.093	0.14	1	HMGXB3
KIAA2013	0.228007	0.0689538	0.203	0.14	1	KIAA2013
TRAPPC6B	0.228124	0.029864	0.212	0.14	1	TRAPPC6B
ARHGEF3	0.228349	0.0703582	0.322	0.237	1	ARHGEF3
STX10	0.228381	-0.141385	0.212	0.263	1	STX10
YIPF3	0.228461	0.0887606	0.28	0.202	1	YIPF3
UQCRC1	0.228477	-0.130001	0.161	0.219	1	UQCRC1
ORMDL1	0.228699	-0.170724	0.449	0.491	1	ORMDL1
SLMAP	0.22885	0.0858885	0.186	0.123	1	SLMAP
UBE3C	0.228885	0.0828252	0.169	0.114	1	UBE3C
LYRM1	0.228885	-0.208503	0.119	0.167	1	LYRM1
TPP2	0.228985	0.0720171	0.28	0.211	1	TPP2
RNF146	0.229065	0.0711768	0.161	0.105	1	RNF146
FAM96B	0.229241	0.123249	0.619	0.561	1	FAM96B
NIP7	0.229393	-0.14178	0.127	0.175	1	NIP7
TRPT1	0.229445	-0.0959916	0.076	0.123	1	TRPT1
ACO2	0.22994	0.0647166	0.153	0.096	1	ACO2
NARS	0.230195	0.0559251	0.347	0.254	1	NARS
KHDRBS1	0.230336	0.106389	0.441	0.351	1	KHDRBS1
ENDOG	0.230661	0.115948	0.136	0.088	1	ENDOG
IMMT	0.230707	0.102966	0.297	0.219	1	IMMT
LIMD2	0.230707	-0.129815	0.856	0.904	1	LIMD2
RASA2	0.230853	0.0137604	0.297	0.211	1	RASA2
VPS13C	0.230922	0.050746	0.441	0.333	1	VPS13C
PRDM2	0.23095	0.0907	0.288	0.211	1	PRDM2
SEC11C	0.231026	0.10231	0.364	0.281	1	SEC11C
HEXB	0.231264	0.0598795	0.153	0.096	1	HEXB
ARID4B	0.231482	-0.155622	0.585	0.614	1	ARID4B
SKAP2	0.231745	-0.161211	0.305	0.36	1	SKAP2
ARRB1	0.231772	-0.0128851	0.11	0.061	1	ARRB1
ATF7IP	0.231938	-0.194458	0.246	0.298	1	ATF7IP
ARHGAP26	0.232093	-0.167017	0.169	0.219	1	ARHGAP26
RAP2B	0.232107	0.114761	0.212	0.149	1	RAP2B
TRIM22	0.232202	0.102052	0.373	0.289	1	TRIM22
GCDH	0.232474	0.0381382	0.186	0.123	1	GCDH
LSM5	0.232592	0.0811862	0.449	0.351	1	LSM5
COQ9	0.232804	-0.0694476	0.068	0.114	1	COQ9
UTP3	0.232842	-0.0246193	0.237	0.158	1	UTP3
MTRNR2L12	0.232937	-0.150426	0.644	0.64	1	MTRNR2L12
PDS5A	0.232975	0.0667385	0.271	0.202	1	PDS5A
RPL10A	0.23341	-0.0622064	0.975	0.991	1	RPL10A
MTO1	0.233453	0.0992538	0.136	0.088	1	MTO1
BCL2L1	0.233817	-0.129928	0.085	0.132	1	BCL2L1
PSMA1	0.233892	-0.0990796	0.551	0.605	1	PSMA1
YIF1A	0.233929	0.0700355	0.153	0.096	1	YIF1A
RRS1	0.233929	0.0496706	0.153	0.096	1	RRS1
TMEM138	0.23396	0.079485	0.195	0.132	1	TMEM138
CWF19L2	0.234036	-0.0955732	0.212	0.281	1	CWF19L2
POLR2G	0.234125	0.0927839	0.39	0.307	1	POLR2G
PYCARD	0.234525	0.109718	0.636	0.553	1	PYCARD
RNH1	0.234688	0.024928	0.5	0.395	1	RNH1
ZSCAN18	0.235177	0.092723	0.169	0.114	1	ZSCAN18
MICU3	0.23518	0.129652	0.102	0.061	1	MICU3
CIZ1	0.23518	0.106158	0.102	0.061	1	CIZ1
FAU	0.235336	0.0587909	1	1	1	FAU
LRRC59	0.23555	-0.0984372	0.144	0.202	1	LRRC59
44083	0.235562	-0.223098	0.475	0.518	1	44083
MRPS27	0.236151	0.0703241	0.127	0.079	1	MRPS27
ADAM28	0.236161	-0.151425	0.169	0.228	1	ADAM28
CLIC1	0.236433	0.0674099	0.949	0.921	1	CLIC1
CST3	0.236807	0.115429	0.102	0.061	1	CST3
SLC50A1	0.23684	-0.0606286	0.076	0.123	1	SLC50A1
FBXO42	0.236842	0.062575	0.161	0.105	1	FBXO42
AC084033.3	0.236922	0.10578	0.144	0.096	1	AC084033.3
OCIAD2	0.237327	-0.132556	0.585	0.605	1	OCIAD2
GSTK1	0.237362	0.064515	0.602	0.474	1	GSTK1
MTURN	0.237364	-0.0839638	0.11	0.167	1	MTURN
IFITM3	0.237484	0.194987	0.246	0.193	1	IFITM3
SYS1	0.237906	-0.107466	0.144	0.202	1	SYS1
PRKAA1	0.237946	0.0705318	0.263	0.193	1	PRKAA1
MYO9B	0.237995	-0.156258	0.263	0.325	1	MYO9B
SLC27A3	0.238012	-0.055443	0.11	0.167	1	SLC27A3
MED6	0.23804	0.0376095	0.288	0.211	1	MED6
PREPL	0.238128	-0.134536	0.085	0.132	1	PREPL
VPS16	0.238146	0.12331	0.153	0.105	1	VPS16
PMPCB	0.238391	-0.111808	0.169	0.228	1	PMPCB
ANAPC11	0.238539	0.082225	0.568	0.439	1	ANAPC11
TFRC	0.238646	0.0360387	0.153	0.096	1	TFRC
GNG5	0.238826	0.0929629	0.695	0.623	1	GNG5
NF1	0.239011	0.0731457	0.169	0.114	1	NF1
MRPL52	0.239024	-0.155432	0.263	0.316	1	MRPL52
EEF1AKMT2	0.239093	0.0915146	0.127	0.079	1	EEF1AKMT2
SUMF2	0.23918	0.0832718	0.305	0.228	1	SUMF2
DCAF15	0.239372	-0.109861	0.136	0.193	1	DCAF15
PNISR	0.239384	-0.121663	0.864	0.86	1	PNISR
C8orf33	0.239475	0.0827035	0.161	0.105	1	C8orf33
AC060780.1	0.239844	-0.07654	0.076	0.123	1	AC060780.1
FOXN2	0.239844	-0.100419	0.076	0.123	1	FOXN2
IKBIP	0.239939	0.0514836	0.229	0.158	1	IKBIP
RPS15	0.240001	-0.0578227	1	1	1	RPS15
SLC25A3	0.240527	0.147251	0.763	0.684	1	SLC25A3
AC022706.1	0.240573	0.0754828	0.127	0.079	1	AC022706.1
ITPR2	0.240637	-0.0814006	0.169	0.228	1	ITPR2
MRPS30	0.240688	0.0643624	0.153	0.096	1	MRPS30
TFAM	0.240775	0.0467262	0.28	0.202	1	TFAM
NDUFV1	0.240837	0.0417636	0.314	0.228	1	NDUFV1
CNPY2	0.240984	0.128931	0.458	0.368	1	CNPY2
TSPOAP1-AS1	0.241191	0.0907523	0.305	0.228	1	TSPOAP1-AS1
KMT2B	0.241201	0.12039	0.229	0.167	1	KMT2B
LINC00996	0.241435	0.125419	0.39	0.307	1	LINC00996
EIF4A3	0.241438	0.104933	0.314	0.237	1	EIF4A3
PPP2R1A	0.241495	0.112917	0.246	0.184	1	PPP2R1A
UBXN4	0.241618	0.0567982	0.686	0.57	1	UBXN4
TMED4	0.241963	-0.176594	0.263	0.316	1	TMED4
C11orf68	0.242056	-0.130535	0.102	0.149	1	C11orf68
AC139887.2	0.24206	0.083659	0.127	0.079	1	AC139887.2
NEU1	0.24206	0.0784277	0.127	0.079	1	NEU1
ABHD18	0.24206	0.0734506	0.127	0.079	1	ABHD18
CD59	0.242175	0.132757	0.153	0.105	1	CD59
SEC61G	0.242398	0.0892543	0.61	0.509	1	SEC61G
TSNAX	0.242456	0.104362	0.322	0.254	1	TSNAX
PAPOLG	0.242495	-0.113837	0.085	0.132	1	PAPOLG
TTC9C	0.242888	-0.139772	0.119	0.167	1	TTC9C
PPP4R2	0.243019	0.0607785	0.297	0.211	1	PPP4R2
C1orf52	0.243044	0.0109603	0.178	0.114	1	C1orf52
SMARCC1	0.243351	-0.158778	0.246	0.298	1	SMARCC1
NDUFA6	0.243375	0.102873	0.373	0.298	1	NDUFA6
ECD	0.243393	0.081983	0.102	0.061	1	ECD
FAM160B1	0.243463	-0.164199	0.11	0.158	1	FAM160B1
PCLAF	0.243553	0.111071	0.127	0.079	1	PCLAF
KIAA0040	0.243847	0.136336	0.144	0.096	1	KIAA0040
EIF2B1	0.24419	0.0775551	0.169	0.114	1	EIF2B1
PRKD3	0.24462	0.0287767	0.237	0.167	1	PRKD3
CTSB	0.244858	0.0876426	0.136	0.088	1	CTSB
NCAPD2	0.244858	0.0854342	0.136	0.088	1	NCAPD2
ISG20L2	0.245053	0.0630568	0.127	0.079	1	ISG20L2
RAB28	0.245053	0.0549238	0.127	0.079	1	RAB28
RNF40	0.24506	0.117283	0.102	0.061	1	RNF40
CNOT6	0.24506	0.111749	0.102	0.061	1	CNOT6
GLRX5	0.245173	0.14166	0.356	0.298	1	GLRX5
EIF3F	0.245287	-0.105431	0.627	0.684	1	EIF3F
FAM215B	0.245489	-0.0773345	0.136	0.193	1	FAM215B
FLOT2	0.245612	-0.153967	0.127	0.175	1	FLOT2
SMAP2	0.245849	0.0570478	0.449	0.36	1	SMAP2
ITGB1	0.246133	-0.129612	0.619	0.658	1	ITGB1
TNIK	0.246148	0.0273153	0.161	0.105	1	TNIK
RAB27A	0.246298	-0.136969	0.373	0.439	1	RAB27A
STK11	0.246402	-0.180913	0.161	0.211	1	STK11
RALY	0.246553	0.0545913	0.398	0.298	1	RALY
TMX1	0.246572	0.0169851	0.28	0.202	1	TMX1
ZBTB8OS	0.246626	-0.218039	0.331	0.36	1	ZBTB8OS
PIGS	0.246657	0.109538	0.144	0.096	1	PIGS
DUSP2	0.246659	-0.12923	0.305	0.36	1	DUSP2
PON2	0.246734	0.0822009	0.102	0.061	1	PON2
PQLC3	0.246809	0.0805662	0.169	0.114	1	PQLC3
ANAPC7	0.246809	-0.159008	0.119	0.167	1	ANAPC7
SNTB2	0.24686	0.150525	0.195	0.14	1	SNTB2
STX8	0.247649	0.108063	0.297	0.228	1	STX8
DNPH1	0.247673	0.0585302	0.542	0.43	1	DNPH1
POC1B	0.24777	0.0808119	0.136	0.088	1	POC1B
TRMT13	0.247785	-0.163386	0.186	0.237	1	TRMT13
GIMAP7	0.247827	-0.126442	0.915	0.939	1	GIMAP7
TMED9	0.248522	0.0722422	0.364	0.289	1	TMED9
SARAF	0.248819	-0.167916	0.814	0.816	1	SARAF
CNOT2	0.248959	-0.170951	0.28	0.342	1	CNOT2
REEP5	0.249	-0.166902	0.644	0.649	1	REEP5
TNFAIP8	0.249112	-0.0747869	0.407	0.482	1	TNFAIP8
SCCPDH	0.249234	0.0853815	0.136	0.088	1	SCCPDH
MCMBP	0.249234	0.0725004	0.136	0.088	1	MCMBP
HECA	0.249323	0.0657064	0.203	0.14	1	HECA
RRP8	0.249466	-0.131424	0.127	0.175	1	RRP8
TPM3	0.249704	0.115551	0.805	0.772	1	TPM3
HERC4	0.249718	0.110496	0.339	0.272	1	HERC4
SRP72	0.249883	0.119313	0.398	0.325	1	SRP72
GSDMD	0.249936	0.141353	0.39	0.298	1	GSDMD
CD96	0.250148	-0.0965531	0.703	0.667	1	CD96
AGPAT2	0.250168	-0.104756	0.161	0.219	1	AGPAT2
TMEM256	0.25039	-0.125647	0.237	0.298	1	TMEM256
ARID4A	0.250648	-0.264897	0.28	0.316	1	ARID4A
CHORDC1	0.250725	0.080654	0.28	0.211	1	CHORDC1
MFSD10	0.251226	0.067605	0.424	0.333	1	MFSD10
UBA1	0.251786	-0.176435	0.102	0.149	1	UBA1
ZFYVE21	0.251806	0.0982876	0.102	0.061	1	ZFYVE21
EXD3	0.251806	0.0702434	0.102	0.061	1	EXD3
CGAS	0.252344	0.0820698	0.144	0.096	1	CGAS
WAPL	0.252405	-0.178512	0.288	0.333	1	WAPL
LGALS3	0.252535	0.197474	0.254	0.202	1	LGALS3
CYCS	0.252559	0.0240361	0.492	0.377	1	CYCS
CD37	0.252621	-0.135041	0.746	0.702	1	CD37
CHD8	0.252676	-0.135126	0.22	0.281	1	CHD8
RNF165	0.252774	-0.139107	0.119	0.167	1	RNF165
ILK	0.252957	0.0533039	0.415	0.316	1	ILK
HBP1	0.252973	-0.109955	0.136	0.193	1	HBP1
APOL1	0.253007	0.0537069	0.203	0.14	1	APOL1
PSMA4	0.253244	-0.131599	0.508	0.535	1	PSMA4
UVRAG	0.253443	-0.152959	0.119	0.167	1	UVRAG
CYTIP	0.253473	0.111913	0.602	0.509	1	CYTIP
CCNY	0.254067	0.0975918	0.186	0.132	1	CCNY
ETFA	0.254143	0.0379633	0.314	0.237	1	ETFA
APEH	0.254615	-0.0904424	0.102	0.149	1	APEH
EP400	0.254671	0.0830527	0.178	0.123	1	EP400
PDE4D	0.254795	0.072433	0.237	0.175	1	PDE4D
PPTC7	0.255154	0.0897549	0.136	0.088	1	PPTC7
ASCC3	0.255324	0.126605	0.203	0.149	1	ASCC3
PARP8	0.255682	-0.131072	0.322	0.368	1	PARP8
PPP2R5C	0.255837	-0.113191	0.559	0.561	1	PPP2R5C
LDLRAD4	0.255847	-0.120901	0.229	0.289	1	LDLRAD4
ABHD8	0.255934	-0.11288	0.085	0.132	1	ABHD8
FNDC3A	0.255983	-0.17526	0.127	0.175	1	FNDC3A
ACOT13	0.256188	0.132896	0.22	0.167	1	ACOT13
AP2B1	0.256418	0.100963	0.263	0.193	1	AP2B1
ZSWIM7	0.256648	0.0348182	0.136	0.088	1	ZSWIM7
AGA	0.25695	0.065258	0.102	0.061	1	AGA
ZNF276	0.257023	0.166484	0.178	0.132	1	ZNF276
SOD1	0.257068	0.102572	0.72	0.658	1	SOD1
DHRS7	0.257107	-0.141736	0.551	0.588	1	DHRS7
EMB	0.257107	-0.127722	0.568	0.57	1	EMB
C6orf203	0.257128	-0.0956163	0.093	0.14	1	C6orf203
CCT3	0.257467	0.101762	0.627	0.526	1	CCT3
C4orf48	0.25747	0.0812038	0.254	0.193	1	C4orf48
LAS1L	0.257482	-0.134444	0.119	0.167	1	LAS1L
SMARCAD1	0.257791	-0.205658	0.153	0.202	1	SMARCAD1
DPM2	0.257909	0.0659052	0.22	0.158	1	DPM2
RHOQ	0.257922	-0.154315	0.136	0.184	1	RHOQ
FANCA	0.25815	0.0928048	0.136	0.088	1	FANCA
BRD7	0.258482	0.0227152	0.347	0.254	1	BRD7
SIRPG	0.258681	0.0804401	0.102	0.061	1	SIRPG
UBE2Q1	0.258689	0.0270923	0.195	0.132	1	UBE2Q1
SLA	0.25869	-0.114383	0.517	0.544	1	SLA
STT3B	0.259097	-0.129324	0.331	0.386	1	STT3B
LONP2	0.259137	-0.0808502	0.22	0.281	1	LONP2
UBN1	0.259236	-0.160925	0.271	0.325	1	UBN1
ZRANB2	0.259401	-0.213288	0.424	0.482	1	ZRANB2
ZNF638	0.259485	0.0945927	0.424	0.36	1	ZNF638
MCM7	0.25958	0.10187	0.144	0.096	1	MCM7
CBWD1	0.259657	0.0527865	0.136	0.088	1	CBWD1
RAB29	0.25969	0.0910458	0.271	0.202	1	RAB29
NSMCE1	0.259931	-0.0934383	0.22	0.289	1	NSMCE1
TP53	0.25995	0.0854884	0.178	0.123	1	TP53
TDG	0.25995	0.061439	0.178	0.123	1	TDG
AHI1	0.260051	0.205095	0.381	0.307	1	AHI1
WDR6	0.2602	0.0718916	0.169	0.114	1	WDR6
GPN3	0.2602	0.0583089	0.169	0.114	1	GPN3
CBX3	0.260409	-0.121139	0.483	0.5	1	CBX3
PPP5C	0.260526	-0.0666679	0.085	0.132	1	PPP5C
C12orf45	0.260526	-0.0982357	0.085	0.132	1	C12orf45
RCN2	0.260612	0.0789282	0.424	0.333	1	RCN2
SCYL2	0.261245	-0.145536	0.068	0.105	1	SCYL2
C2orf68	0.261566	0.0751651	0.169	0.114	1	C2orf68
CEP85L	0.261878	-0.125808	0.144	0.193	1	CEP85L
RTCB	0.261961	0.0613308	0.305	0.228	1	RTCB
SLC52A2	0.26207	-0.0605478	0.085	0.132	1	SLC52A2
JOSD2	0.262117	-0.0932445	0.169	0.228	1	JOSD2
FSD1	0.262167	0.0885108	0.102	0.061	1	FSD1
AC008124.1	0.262515	0.0935126	0.144	0.096	1	AC008124.1
SMIM29	0.262937	0.0529278	0.169	0.114	1	SMIM29
TINF2	0.263031	-0.119949	0.237	0.298	1	TINF2
PEX13	0.263235	-0.0622953	0.076	0.123	1	PEX13
MMP24OS	0.26391	0.104415	0.288	0.228	1	MMP24OS
SCAMP1-AS1	0.263922	0.0737843	0.102	0.061	1	SCAMP1-AS1
ZNF350	0.26399	0.0684256	0.144	0.096	1	ZNF350
PML	0.264105	-0.104193	0.11	0.158	1	PML
BTN3A1	0.264261	0.0124547	0.186	0.123	1	BTN3A1
LPGAT1	0.264454	0.067325	0.297	0.219	1	LPGAT1
C1D	0.264543	0.0349897	0.432	0.333	1	C1D
NUDT22	0.264982	0.0955874	0.347	0.272	1	NUDT22
AC004687.1	0.265132	-0.0392258	0.678	0.772	1	AC004687.1
BTG1	0.265137	-0.111425	0.983	0.982	1	BTG1
EPS15L1	0.265471	0.105421	0.144	0.096	1	EPS15L1
ABTB1	0.265733	-0.139266	0.161	0.211	1	ABTB1
KPNA4	0.26594	0.0581682	0.331	0.263	1	KPNA4
SF3B2	0.266038	0.0490931	0.568	0.465	1	SF3B2
LINC00909	0.266153	-0.103791	0.102	0.149	1	LINC00909
CASP3	0.266236	0.145448	0.305	0.246	1	CASP3
PARVG	0.266405	0.0854966	0.271	0.202	1	PARVG
MED28	0.266478	0.111038	0.288	0.219	1	MED28
PLEKHF1	0.26652	-0.249749	0.288	0.333	1	PLEKHF1
AP003774.4	0.266732	0.0113965	0.127	0.079	1	AP003774.4
SARNP	0.266737	0.122058	0.11	0.07	1	SARNP
NSF	0.266737	0.107055	0.11	0.07	1	NSF
DENND4A	0.266837	-0.0568017	0.144	0.202	1	DENND4A
44075	0.267364	0.0928601	0.475	0.386	1	44075
TRPC4AP	0.26762	-0.104313	0.102	0.149	1	TRPC4AP
FBXO7	0.267737	-0.145287	0.203	0.254	1	FBXO7
R3HCC1	0.268011	0.0676526	0.178	0.123	1	R3HCC1
GTPBP4	0.268282	0.144088	0.288	0.228	1	GTPBP4
STAMBP	0.268374	-0.0978444	0.11	0.158	1	STAMBP
RFTN1	0.26855	0.140819	0.331	0.263	1	RFTN1
PIK3CG	0.268899	0.066447	0.22	0.158	1	PIK3CG
ARPC5L	0.268935	0.150884	0.653	0.544	1	ARPC5L
PQBP1	0.268968	-0.13785	0.144	0.193	1	PQBP1
ZNF227	0.269235	0.0879375	0.102	0.061	1	ZNF227
UPF2	0.269349	-0.155755	0.22	0.272	1	UPF2
CENPB	0.269729	0.0962826	0.186	0.132	1	CENPB
POLR3E	0.269873	-0.136209	0.068	0.105	1	POLR3E
ZNF347	0.270138	0.118497	0.11	0.07	1	ZNF347
SNRPD1	0.270262	0.0337445	0.508	0.412	1	SNRPD1
EDEM1	0.270268	0.0722484	0.153	0.105	1	EDEM1
MVB12A	0.270378	0.0526176	0.136	0.088	1	MVB12A
JADE2	0.270644	-0.0892595	0.093	0.14	1	JADE2
ALDH9A1	0.270725	0.161578	0.212	0.158	1	ALDH9A1
NNT	0.270735	0.0468176	0.178	0.123	1	NNT
GRK6	0.270832	-0.162027	0.305	0.342	1	GRK6
EVL	0.271015	-0.10175	0.915	0.833	1	EVL
TXLNG	0.271023	0.0635449	0.102	0.061	1	TXLNG
ETV6	0.271621	-0.13342	0.068	0.105	1	ETV6
NFATC3	0.27169	-0.242118	0.28	0.298	1	NFATC3
MKLN1	0.271729	0.126963	0.153	0.105	1	MKLN1
ITSN2	0.271859	0.0396932	0.364	0.281	1	ITSN2
ETF1	0.272105	-0.163105	0.127	0.175	1	ETF1
KIF13B	0.272593	-0.153074	0.076	0.114	1	KIF13B
THOC2	0.272758	0.141887	0.322	0.254	1	THOC2
HIVEP3	0.273161	0.0520337	0.127	0.079	1	HIVEP3
[truncated: 3,712 more rows]

## Sheet: S4B PD-L1 vs. IgG
Table S4B: NK Cell Differential Expression anti-PD-L1 vs. IgG
	p_val	avg_logFC	pct.1	pct.2	p_val_adj	Gene_ID	logP
AGTRAP	5.38843e-05	0.380465	0.263	0.061	1	AGTRAP	4.26854
C1QBP	0.000172077	0.302535	0.621	0.368	1	C1QBP	3.76428
TERF1	0.000182662	0.356665	0.326	0.114	1	TERF1	3.73835
FAM49A	0.000208208	0.337851	0.211	0.044	1	FAM49A	3.6815
LAMTOR2	0.000307637	0.3139	0.516	0.272	1	LAMTOR2	3.51196
BTG1	0.000712466	-0.3566	0.947	0.982	1	BTG1	3.14724
LDHA	0.000779114	0.288133	0.863	0.658	1	LDHA	3.1084
PARK7	0.000828721	0.269134	0.916	0.781	1	PARK7	3.08159
MSMO1	0.000847506	0.362717	0.253	0.088	1	MSMO1	3.07186
RTF1	0.000945989	0.264331	0.579	0.333	1	RTF1	3.02411
NME1	0.00095401	0.316743	0.316	0.132	1	NME1	3.02045
ZER1	0.000981022	0.221854	0.116	0.009	1	ZER1	3.00832
ZNF583	0.0010011	0.250293	0.116	0.009	1	ZNF583	2.99952
LYSMD3	0.0010853	0.147714	0.116	0.009	1	LYSMD3	2.96445
BICRAL	0.00112955	-0.260121	0.011	0.132	1	BICRAL	2.94709
GTF2A2	0.00115367	0.303138	0.6	0.351	1	GTF2A2	2.93792
APRT	0.00116493	0.298844	0.874	0.667	1	APRT	2.9337
APBB1IP	0.00125629	0.370537	0.747	0.553	1	APBB1IP	2.90091
YIF1A	0.00127625	0.265553	0.274	0.096	1	YIF1A	2.89406
OGFRL1	0.00142922	0.205494	0.168	0.035	1	OGFRL1	2.8449
WDR26	0.0016939	0.299234	0.295	0.123	1	WDR26	2.77111
HSPA13	0.0017753	0.185545	0.147	0.026	1	HSPA13	2.75073
LY6E	0.00196022	0.480469	0.758	0.605	1	LY6E	2.7077
C20orf27	0.00202306	0.133444	0.105	0.009	1	C20orf27	2.69399
PSMD8	0.00208081	0.277966	0.726	0.535	1	PSMD8	2.68177
FAM91A1	0.00213459	-0.264089	0.021	0.14	1	FAM91A1	2.67069
NUP210	0.00218959	0.260968	0.284	0.114	1	NUP210	2.65964
ARRB2	0.00224282	-0.361017	0.232	0.404	1	ARRB2	2.64921
CTR9	0.00251872	0.237116	0.295	0.123	1	CTR9	2.59882
EIF4A2	0.00260161	-0.281363	0.821	0.886	1	EIF4A2	2.58476
PPIL4	0.00275711	0.291207	0.284	0.123	1	PPIL4	2.55955
DHX29	0.00290578	0.251075	0.337	0.149	1	DHX29	2.53674
NOL9	0.0029162	0.250308	0.168	0.044	1	NOL9	2.53518
EIF4B	0.00317571	0.320178	0.558	0.377	1	EIF4B	2.49816
CYB5A	0.00347102	0.242006	0.263	0.105	1	CYB5A	2.45954
C3orf58	0.00354041	0.203658	0.116	0.018	1	C3orf58	2.45095
NXPH4	0.00360318	0.22846	0.116	0.018	1	NXPH4	2.44331
TMEM87B	0.00360977	0.182708	0.168	0.044	1	TMEM87B	2.44252
BRI3BP	0.00366697	0.165584	0.116	0.018	1	BRI3BP	2.43569
SSR4	0.00369925	0.21848	0.916	0.816	1	SSR4	2.43189
UFM1	0.00371096	-0.371306	0.147	0.307	1	UFM1	2.43051
PCNX1	0.00375486	0.264765	0.263	0.114	1	PCNX1	2.42541
MPG	0.00383107	0.302406	0.568	0.377	1	MPG	2.41668
PAFAH2	0.00386453	0.162167	0.116	0.018	1	PAFAH2	2.4129
TSPAN5	0.00398033	0.223262	0.305	0.132	1	TSPAN5	2.40008
ZNRF1	0.00411515	0.204867	0.368	0.175	1	ZNRF1	2.38561
IGFBP2	0.00422163	0.291203	0.189	0.061	1	IGFBP2	2.37452
CTSC	0.00430887	0.30616	0.747	0.544	1	CTSC	2.36564
TAP1	0.00442553	0.302543	0.526	0.325	1	TAP1	2.35403
HDAC1	0.00473216	0.235345	0.484	0.263	1	HDAC1	2.32494
TMEM147-AS1	0.00475519	-0.21258	0.011	0.105	1	TMEM147-AS1	2.32283
RNF6	0.00480144	0.244191	0.2	0.07	1	RNF6	2.31863
RNF135	0.00482918	0.234988	0.126	0.026	1	RNF135	2.31613
CCDC142	0.00494442	0.181097	0.158	0.044	1	CCDC142	2.30588
MALAT1	0.00494774	-0.188191	1	1	1	MALAT1	2.30559
IER3	0.00496106	-0.402919	0.042	0.158	1	IER3	2.30443
ADAR	0.00496927	0.34239	0.484	0.298	1	ADAR	2.30371
GLIPR2	0.00500258	0.221612	0.632	0.404	1	GLIPR2	2.30081
R3HCC1L	0.00500865	0.148355	0.147	0.035	1	R3HCC1L	2.30028
RASA3	0.0052307	0.237022	0.2	0.07	1	RASA3	2.28144
TXNIP	0.00526277	-0.353992	0.884	0.947	1	TXNIP	2.27879
OTUD6B	0.00548386	0.207211	0.126	0.026	1	OTUD6B	2.26091
PSMC1	0.00556029	0.283701	0.463	0.289	1	PSMC1	2.2549
VDAC1	0.00560638	0.290395	0.537	0.395	1	VDAC1	2.25132
ALYREF	0.00577185	0.233144	0.295	0.14	1	ALYREF	2.23868
NFAT5	0.00587921	-0.361801	0.168	0.325	1	NFAT5	2.23068
SQLE	0.00588439	0.274547	0.232	0.096	1	SQLE	2.2303
NCKAP1L	0.00592197	0.225828	0.442	0.237	1	NCKAP1L	2.22753
ACO2	0.00594905	0.220773	0.242	0.096	1	ACO2	2.22555
ATAD1	0.00627983	0.198802	0.211	0.079	1	ATAD1	2.20205
CD82	0.00636218	-0.266185	0.095	0.237	1	CD82	2.19639
OXR1	0.00636218	-0.287583	0.095	0.237	1	OXR1	2.19639
TRAPPC11	0.00646328	0.203912	0.168	0.053	1	TRAPPC11	2.18955
GLRX5	0.00651131	0.321108	0.453	0.298	1	GLRX5	2.18633
MTHFS	0.0066052	0.164689	0.158	0.044	1	MTHFS	2.18011
FAM20B	0.00663189	0.147114	0.105	0.018	1	FAM20B	2.17836
DALRD3	0.00672091	0.192905	0.168	0.053	1	DALRD3	2.17257
RNF44	0.00673099	0.193465	0.211	0.079	1	RNF44	2.17192
MNAT1	0.00675196	0.239846	0.295	0.132	1	MNAT1	2.17057
TMF1	0.00680479	-0.310325	0.274	0.447	1	TMF1	2.16719
NUDCD3	0.00680895	0.22254	0.211	0.079	1	NUDCD3	2.16692
C1orf162	0.00688552	-0.393823	0.126	0.272	1	C1orf162	2.16206
IDH2	0.00699007	0.285812	0.421	0.246	1	IDH2	2.15552
FAM208B	0.00704548	0.280512	0.2	0.079	1	FAM208B	2.15209
NUDT16L1	0.00724579	0.322524	0.347	0.193	1	NUDT16L1	2.13991
HACD2	0.00747509	0.143999	0.105	0.018	1	HACD2	2.12638
ZC3H14	0.00753563	-0.30017	0.053	0.167	1	ZC3H14	2.12288
ZNF518B	0.00764767	0.178489	0.168	0.053	1	ZNF518B	2.11647
GALE	0.00766904	0.217198	0.189	0.07	1	GALE	2.11526
DHX9	0.00771533	0.173621	0.347	0.175	1	DHX9	2.11265
PPM1G	0.00776943	0.259927	0.653	0.43	1	PPM1G	2.10961
RPUSD3	0.00783803	0.185551	0.263	0.114	1	RPUSD3	2.10579
DENND6A	0.00789578	-0.274066	0.063	0.184	1	DENND6A	2.1026
ABI3	0.007896	0.1289	0.389	0.202	1	ABI3	2.10259
MRPL43	0.00796362	0.27231	0.379	0.211	1	MRPL43	2.09889
ZNF66	0.00799896	0.123471	0.105	0.018	1	ZNF66	2.09697
UBA7	0.00806413	0.227111	0.179	0.061	1	UBA7	2.09344
TPM4	0.00810122	0.195753	0.484	0.272	1	TPM4	2.09145
PEX19	0.00810607	0.210144	0.116	0.026	1	PEX19	2.09119
CAPZA1	0.00841828	0.267489	0.516	0.325	1	CAPZA1	2.07478
CKS2	0.00847325	0.234251	0.2	0.079	1	CKS2	2.07195
RNF145	0.00880594	0.255006	0.263	0.123	1	RNF145	2.05522
ST3GAL5	0.00882008	0.251177	0.242	0.105	1	ST3GAL5	2.05453
PIGX	0.00888687	0.21672	0.211	0.088	1	PIGX	2.05125
METTL4	0.00889202	-0.259313	0.053	0.167	1	METTL4	2.051
PPP2R5A	0.00892604	0.303811	0.263	0.132	1	PPP2R5A	2.04934
CTNNBL1	0.00901903	0.219112	0.326	0.167	1	CTNNBL1	2.04484
WDR37	0.00907035	0.18489	0.137	0.035	1	WDR37	2.04238
FYB1	0.00917112	0.258254	0.758	0.614	1	FYB1	2.03758
NABP2	0.00918545	0.271602	0.211	0.088	1	NABP2	2.0369
DIS3	0.00925356	0.207996	0.295	0.14	1	DIS3	2.03369
EEF1E1	0.00959513	0.197883	0.305	0.149	1	EEF1E1	2.01795
TFCP2	0.00987532	-0.225745	0.042	0.149	1	TFCP2	2.00545
PTBP2	0.00991693	0.1389	0.116	0.026	1	PTBP2	2.00362
LTBP3	0.00996492	0.251796	0.326	0.175	1	LTBP3	2.00153
YWHAG	0.010002	-0.223759	0.042	0.149	1	YWHAG	1.99992
THOC7	0.0100142	0.229359	0.495	0.298	1	THOC7	1.99938
AC058791.1	0.0102073	-0.29312	0.105	0.237	1	AC058791.1	1.99109
ELOC	0.0102359	0.180848	0.495	0.307	1	ELOC	1.98987
CALM3	0.0103417	0.253407	0.653	0.474	1	CALM3	1.98541
POLRMT	0.0105856	0.128085	0.137	0.035	1	POLRMT	1.97528
UQCRC2	0.0106513	0.269206	0.516	0.36	1	UQCRC2	1.9726
LGALS3	0.0106661	0.31271	0.358	0.202	1	LGALS3	1.97199
CHD9	0.0108934	0.260114	0.484	0.325	1	CHD9	1.96284
SPNS1	0.0108952	0.27273	0.221	0.096	1	SPNS1	1.96276
SPTY2D1	0.0108952	0.238437	0.221	0.096	1	SPTY2D1	1.96276
THEM6	0.0111491	0.204202	0.147	0.044	1	THEM6	1.95276
AKIRIN1	0.0112649	0.265469	0.326	0.175	1	AKIRIN1	1.94827
CRCP	0.0114765	0.229925	0.2	0.079	1	CRCP	1.94019
MAGOH	0.011499	0.232152	0.558	0.386	1	MAGOH	1.93934
ZBTB20	0.0115361	0.296811	0.495	0.307	1	ZBTB20	1.93794
UBR7	0.0115968	0.204548	0.168	0.061	1	UBR7	1.93566
GCHFR	0.0117685	0.266421	0.4	0.228	1	GCHFR	1.92928
KRT86	0.0118519	0.243147	0.242	0.105	1	KRT86	1.92621
PMVK	0.0120217	0.197758	0.274	0.132	1	PMVK	1.92003
TSEN54	0.0122722	-0.312157	0.158	0.298	1	TSEN54	1.91108
CITED2	0.0122975	0.249061	0.337	0.184	1	CITED2	1.91018
ZFP36L2	0.0123321	-0.214467	0.758	0.807	1	ZFP36L2	1.90896
SMYD2	0.0123793	0.152232	0.147	0.044	1	SMYD2	1.9073
ARL6IP1	0.0124799	0.240159	0.368	0.219	1	ARL6IP1	1.90379
TIGIT	0.0125928	0.156723	0.621	0.465	1	TIGIT	1.89988
CYSTM1	0.0126303	0.165913	0.189	0.07	1	CYSTM1	1.89858
CPD	0.0127051	0.097923	0.147	0.044	1	CPD	1.89602
SOCS2	0.0131818	0.244848	0.126	0.035	1	SOCS2	1.88002
NDUFB6	0.0131986	0.167397	0.442	0.254	1	NDUFB6	1.87947
CDC14A	0.0132921	-0.302867	0.116	0.246	1	CDC14A	1.87641
ISG20L2	0.0135247	0.145031	0.2	0.079	1	ISG20L2	1.86887
HSPA14.1	0.013541	0.171539	0.168	0.061	1	HSPA14.1	1.86835
CTPS1	0.0135547	0.156767	0.126	0.035	1	CTPS1	1.86791
ELAC2	0.0136212	-0.224219	0.053	0.158	1	ELAC2	1.86579
AC005332.5	0.0137679	-0.278535	0.084	0.202	1	AC005332.5	1.86113
LASP1	0.0137686	0.233004	0.474	0.281	1	LASP1	1.86111
NTAN1	0.0138991	0.177111	0.284	0.132	1	NTAN1	1.85701
SUGT1	0.0141331	0.222021	0.432	0.254	1	SUGT1	1.84976
UBAP2L	0.0144027	0.171444	0.221	0.096	1	UBAP2L	1.84156
GBP1	0.0144153	0.242277	0.232	0.105	1	GBP1	1.84118
STK17B	0.0144602	0.187487	0.768	0.579	1	STK17B	1.83982
POP4	0.0145589	0.205597	0.232	0.105	1	POP4	1.83687
PILRB	0.01466	0.162517	0.358	0.184	1	PILRB	1.83387
RAP2C	0.0149916	-0.232701	0.042	0.14	1	RAP2C	1.82415
FH	0.0150505	0.178638	0.168	0.061	1	FH	1.82245
GBP5	0.0151459	0.267935	0.505	0.333	1	GBP5	1.8197
ISG20	0.0152558	0.382898	0.516	0.368	1	ISG20	1.81656
TMEM68	0.0153085	-0.18683	0.021	0.105	1	TMEM68	1.81507
PPP3CC	0.0153214	0.161289	0.242	0.105	1	PPP3CC	1.8147
PGPEP1	0.0153403	0.188371	0.211	0.088	1	PGPEP1	1.81417
SYT11	0.0153502	0.174451	0.126	0.035	1	SYT11	1.81389
TRPV2	0.0154453	0.212031	0.263	0.123	1	TRPV2	1.8112
EIF1B	0.0155469	0.208166	0.621	0.456	1	EIF1B	1.80836
MICB	0.0155598	-0.188852	0.042	0.14	1	MICB	1.80799
TMEM106C	0.0156176	0.223301	0.221	0.096	1	TMEM106C	1.80639
METTL16	0.0158597	0.20663	0.189	0.079	1	METTL16	1.7997
NPIPB5	0.0159211	-0.207652	0.032	0.123	1	NPIPB5	1.79803
EMC7	0.0159983	0.228409	0.432	0.263	1	EMC7	1.79592
SCO1	0.0160051	-0.289668	0.105	0.219	1	SCO1	1.79574
INTS10	0.0160093	0.219554	0.305	0.158	1	INTS10	1.79563
RYBP	0.016032	0.228528	0.189	0.079	1	RYBP	1.79501
MED4	0.0160587	0.150781	0.421	0.246	1	MED4	1.79429
PEX13	0.0161339	-0.203241	0.032	0.123	1	PEX13	1.79226
XAF1	0.0164031	0.264516	0.379	0.219	1	XAF1	1.78507
EIF2B1	0.0165378	0.180848	0.242	0.114	1	EIF2B1	1.78152
TRIM5	0.0167872	-0.186393	0.032	0.123	1	TRIM5	1.77502
PHF1	0.0168054	-0.219844	0.126	0.263	1	PHF1	1.77455
CD63	0.0168963	0.178408	1	0.939	1	CD63	1.77221
PEF1	0.0169585	-0.298677	0.105	0.219	1	PEF1	1.77061
SIRT2	0.0170164	0.188269	0.242	0.114	1	SIRT2	1.76913
KMT2A	0.0170306	0.165483	0.537	0.342	1	KMT2A	1.76877
NIFK-AS1	0.0172043	-0.30376	0.116	0.237	1	NIFK-AS1	1.76436
FNDC3B	0.0172448	0.209643	0.105	0.026	1	FNDC3B	1.76334
NMRAL1	0.017452	0.165577	0.232	0.105	1	NMRAL1	1.75815
FUBP1	0.0175555	-0.287729	0.274	0.412	1	FUBP1	1.75559
ARID5B	0.0175827	0.295437	0.305	0.175	1	ARID5B	1.75492
PITPNA-AS1	0.0175968	-0.250939	0.053	0.149	1	PITPNA-AS1	1.75457
GLTP	0.0175979	0.152198	0.295	0.149	1	GLTP	1.75454
RAB10	0.0176559	-0.288357	0.179	0.316	1	RAB10	1.75311
PPP1R12C	0.0180266	0.224596	0.147	0.053	1	PPP1R12C	1.74409
SPTSSA	0.0182022	0.250845	0.221	0.105	1	SPTSSA	1.73988
SSBP4	0.0182058	0.234129	0.558	0.36	1	SSBP4	1.73979
IFI44	0.0183733	0.176802	0.137	0.044	1	IFI44	1.73581
ZNF236	0.0185721	0.191199	0.105	0.026	1	ZNF236	1.73114
RNF19A	0.0185829	0.194897	0.442	0.263	1	RNF19A	1.73089
C5orf24	0.0189109	0.217259	0.316	0.175	1	C5orf24	1.72329
CDV3	0.018955	0.26382	0.579	0.412	1	CDV3	1.72228
GZMB	0.019086	0.544311	0.579	0.43	1	GZMB	1.71928
BCAP29	0.0191111	0.224034	0.305	0.175	1	BCAP29	1.71871
ZDHHC3	0.0191251	0.244305	0.232	0.105	1	ZDHHC3	1.7184
SCCPDH	0.0192303	0.200001	0.2	0.088	1	SCCPDH	1.71601
GPATCH4	0.019234	0.205828	0.242	0.114	1	GPATCH4	1.71593
HMGXB4	0.0197794	0.116461	0.263	0.123	1	HMGXB4	1.70379
ACTB	0.01991	0.121932	0.989	1	1	ACTB	1.70093
RNPEPL1	0.019945	0.22719	0.547	0.395	1	RNPEPL1	1.70017
IFI27L1	0.0201875	0.166159	0.116	0.035	1	IFI27L1	1.69492
JAML	0.0202252	-0.354596	0.147	0.263	1	JAML	1.69411
DCPS	0.0202287	0.197776	0.211	0.096	1	DCPS	1.69403
MRPS33	0.020251	0.245065	0.326	0.193	1	MRPS33	1.69355
AIDA	0.0202612	0.165362	0.189	0.079	1	AIDA	1.69334
AL161772.1	0.0202821	0.150875	0.105	0.026	1	AL161772.1	1.69289
YJU2	0.0203278	0.109386	0.137	0.044	1	YJU2	1.69191
UFC1	0.0203288	-0.255887	0.495	0.588	1	UFC1	1.69189
ATXN1L	0.0205801	0.134628	0.105	0.026	1	ATXN1L	1.68655
NOP53	0.0206835	-0.236982	0.653	0.719	1	NOP53	1.68438
LTBP4	0.0208628	0.135953	0.2	0.088	1	LTBP4	1.68063
TMX4	0.0209796	-0.218796	0.358	0.518	1	TMX4	1.6782
MT-CO2	0.0210344	0.0923292	1	1	1	MT-CO2	1.67707
2020-03-03	0.0210649	-0.231845	0.063	0.167	1	2020-03-03	1.67644
SFPQ	0.0213433	0.147462	0.726	0.518	1	SFPQ	1.67074
LIMD2	0.0213878	-0.199752	0.863	0.904	1	LIMD2	1.66983
PRKAG1	0.0216184	0.180514	0.263	0.132	1	PRKAG1	1.66518
CDK4	0.0216567	0.231049	0.221	0.105	1	CDK4	1.66441
CCNH	0.0218715	-0.296664	0.137	0.263	1	CCNH	1.66012
TPMT	0.0218916	0.204448	0.232	0.114	1	TPMT	1.65972
ERBIN	0.0219047	-0.274214	0.168	0.298	1	ERBIN	1.65946
JPT1	0.0220669	0.193683	0.505	0.342	1	JPT1	1.65626
RPS9	0.0222808	0.0926059	1	1	1	RPS9	1.65207
ASPH	0.0224048	-0.187541	0.053	0.149	1	ASPH	1.64966
PISD	0.0224494	0.103319	0.105	0.026	1	PISD	1.64879
VMAC	0.0225025	0.15481	0.116	0.035	1	VMAC	1.64777
TCEAL3	0.0227568	0.20253	0.211	0.096	1	TCEAL3	1.64289
CHMP3	0.022888	0.256952	0.305	0.175	1	CHMP3	1.64039
THYN1	0.0228987	0.193655	0.389	0.246	1	THYN1	1.64019
RNF139	0.0229024	0.147352	0.147	0.053	1	RNF139	1.64012
VEGFB	0.0229109	0.203673	0.411	0.246	1	VEGFB	1.63996
BCL2A1	0.0229173	0.181837	0.158	0.061	1	BCL2A1	1.63984
RRP7A	0.0229603	0.214797	0.358	0.219	1	RRP7A	1.63902
LAGE3	0.0231348	0.224918	0.358	0.219	1	LAGE3	1.63574
ZNF524	0.0231438	-0.259664	0.105	0.219	1	ZNF524	1.63556
CD81	0.0232055	0.240099	0.937	0.842	1	CD81	1.63441
NAPB	0.0234382	0.0824226	0.105	0.026	1	NAPB	1.63008
LSM12	0.0235748	0.249249	0.232	0.114	1	LSM12	1.62755
URM1	0.0235901	0.211575	0.284	0.158	1	URM1	1.62727
UBE2J1	0.0238168	0.245519	0.274	0.149	1	UBE2J1	1.62312
DDOST	0.0239727	0.170062	0.495	0.316	1	DDOST	1.62028
RRP36	0.0240634	0.202572	0.326	0.184	1	RRP36	1.61864
HIST3H2A	0.024219	0.210297	0.179	0.079	1	HIST3H2A	1.61584
L3MBTL2	0.024473	-0.240101	0.032	0.114	1	L3MBTL2	1.61131
TEX261	0.0245726	0.129039	0.147	0.053	1	TEX261	1.60955
CC2D1B	0.024861	0.0597635	0.147	0.053	1	CC2D1B	1.60448
VAMP2	0.0250898	-0.321869	0.579	0.667	1	VAMP2	1.6005
CUL4B	0.0251132	-0.186437	0.032	0.114	1	CUL4B	1.6001
MAP4K4	0.0252447	0.229097	0.221	0.114	1	MAP4K4	1.59783
SQOR	0.02525	0.184749	0.253	0.132	1	SQOR	1.59774
TFIP11	0.0253519	0.16405	0.158	0.061	1	TFIP11	1.59599
VPS18	0.0253795	0.161307	0.116	0.035	1	VPS18	1.59552
DDX39A	0.0254341	0.215987	0.421	0.272	1	DDX39A	1.59458
PPIL1	0.0254388	-0.190369	0.032	0.114	1	PPIL1	1.5945
ABHD8	0.025484	-0.21325	0.042	0.132	1	ABHD8	1.59373
LSM6	0.0255497	0.164352	0.547	0.386	1	LSM6	1.59261
AP3B1	0.0256083	0.194567	0.242	0.123	1	AP3B1	1.59162
H2AFY	0.0262228	0.17727	0.463	0.289	1	H2AFY	1.58132
UHRF2	0.0262841	-0.218307	0.063	0.158	1	UHRF2	1.58031
NDUFS6	0.02643	0.20401	0.684	0.526	1	NDUFS6	1.5779
ATF7IP2	0.0266426	0.155395	0.221	0.105	1	ATF7IP2	1.57442
CCDC97	0.0267665	0.16552	0.2	0.088	1	CCDC97	1.57241
ARPP19	0.0268744	0.160431	0.358	0.219	1	ARPP19	1.57066
IRF2BP2	0.0269105	0.242292	0.316	0.184	1	IRF2BP2	1.57008
NOC2L	0.0269278	0.263435	0.274	0.158	1	NOC2L	1.5698
RNF170	0.0269926	0.221706	0.189	0.088	1	RNF170	1.56875
RNF187	0.0270554	0.224587	0.389	0.246	1	RNF187	1.56775
CLNS1A	0.0270687	0.22432	0.411	0.272	1	CLNS1A	1.56753
SIRT7	0.0271847	-0.317335	0.305	0.412	1	SIRT7	1.56568
SLF2	0.0274906	0.231033	0.242	0.123	1	SLF2	1.56082
BORCS7	0.0277154	0.28814	0.242	0.132	1	BORCS7	1.55728
CIC	0.0278117	0.163603	0.126	0.044	1	CIC	1.55577
NFKB2	0.0278185	0.195561	0.284	0.158	1	NFKB2	1.55567
PRKDC	0.0278524	0.236561	0.421	0.272	1	PRKDC	1.55514
MCEE	0.0281574	0.158303	0.126	0.044	1	MCEE	1.55041
PARVG	0.0282525	0.216141	0.347	0.202	1	PARVG	1.54894
BTBD7	0.0282685	0.254123	0.179	0.079	1	BTBD7	1.5487
SH2D3C	0.0283165	0.141807	0.158	0.061	1	SH2D3C	1.54796
DHX40	0.0285695	0.0875783	0.116	0.035	1	DHX40	1.5441
TMEM191B	0.0288599	0.178791	0.126	0.044	1	TMEM191B	1.53971
NDUFA6	0.0291294	0.191772	0.453	0.298	1	NDUFA6	1.53567
SCAF1	0.0292167	0.188243	0.126	0.044	1	SCAF1	1.53437
KLC1	0.0293583	0.199855	0.189	0.088	1	KLC1	1.53227
XIAP	0.0294237	0.134305	0.326	0.175	1	XIAP	1.5313
BRD1	0.0294352	-0.283275	0.137	0.254	1	BRD1	1.53113
POMP	0.0294428	0.210872	0.747	0.614	1	POMP	1.53102
YWHAE	0.0296233	0.214645	0.463	0.289	1	YWHAE	1.52837
CYB561D2	0.0298781	0.248855	0.326	0.202	1	CYB561D2	1.52465
DPYD	0.0301534	0.212606	0.2	0.096	1	DPYD	1.52066
SHISA5	0.0301544	0.130712	0.432	0.263	1	SHISA5	1.52065
FAM160B1	0.0301552	-0.249233	0.063	0.158	1	FAM160B1	1.52064
SWI5	0.0302349	0.117196	0.158	0.061	1	SWI5	1.51949
EFTUD2	0.0303498	0.16814	0.179	0.079	1	EFTUD2	1.51784
NOTCH1	0.0307733	-0.292264	0.179	0.289	1	NOTCH1	1.51183
FOXK2	0.0308314	0.156202	0.189	0.088	1	FOXK2	1.51101
PSMA7	0.030943	0.135821	0.937	0.789	1	PSMA7	1.50944
SUGP2	0.0310812	-0.258137	0.158	0.272	1	SUGP2	1.5075
SPATA13	0.0311044	0.192843	0.295	0.167	1	SPATA13	1.50718
COX7A2	0.0312026	0.193148	0.811	0.719	1	COX7A2	1.50581
TYROBP	0.0312568	-0.19926	0.916	0.947	1	TYROBP	1.50506
CNPPD1	0.0312813	0.138776	0.179	0.079	1	CNPPD1	1.50472
SERTAD1	0.0317695	0.146761	0.168	0.07	1	SERTAD1	1.49799
NAAA	0.0319159	0.201026	0.179	0.079	1	NAAA	1.49599
TFG	0.0320391	-0.18872	0.147	0.272	1	TFG	1.49432
MXRA7	0.0323244	-0.258704	0.084	0.184	1	MXRA7	1.49047
PATJ	0.0323904	0.205932	0.137	0.053	1	PATJ	1.48958
UBTF	0.0324272	0.27498	0.495	0.368	1	UBTF	1.48909
SNX3	0.0324755	-0.275737	0.453	0.553	1	SNX3	1.48844
MRPS30	0.0325223	0.209453	0.2	0.096	1	MRPS30	1.48782
UCKL1	0.0325612	0.165312	0.179	0.079	1	UCKL1	1.4873
CHD3	0.0327357	0.209049	0.295	0.167	1	CHD3	1.48498
METTL9	0.0328096	0.231854	0.474	0.351	1	METTL9	1.484
CCNY	0.0329431	0.151884	0.253	0.132	1	CCNY	1.48224
TULP4	0.0330348	0.0829664	0.274	0.14	1	TULP4	1.48103
MLLT10	0.0332618	-0.188564	0.084	0.184	1	MLLT10	1.47805
MTPAP	0.0332662	-0.2153	0.053	0.14	1	MTPAP	1.478
TMEM179B	0.0332668	0.218997	0.421	0.281	1	TMEM179B	1.47799
JMJD1C	0.0333298	0.155093	0.379	0.219	1	JMJD1C	1.47717
EXOSC2	0.0333995	0.128547	0.126	0.044	1	EXOSC2	1.47626
COPS5	0.0334013	0.219201	0.4	0.272	1	COPS5	1.47624
SLBP	0.0334771	0.243484	0.326	0.193	1	SLBP	1.47525
CD8A	0.0335507	0.285733	0.179	0.079	1	CD8A	1.4743
COMMD1	0.0335766	0.140756	0.274	0.149	1	COMMD1	1.47396
NDUFS5	0.0335944	0.196987	0.758	0.605	1	NDUFS5	1.47373
GTPBP6	0.0336002	-0.252916	0.2	0.316	1	GTPBP6	1.47366
DHRS4L2	0.0337654	0.198119	0.2	0.096	1	DHRS4L2	1.47153
ATP6V0E2	0.0338011	0.173324	0.179	0.088	1	ATP6V0E2	1.47107
SLC38A2	0.0338653	0.211617	0.389	0.254	1	SLC38A2	1.47025
MAP4K5	0.034043	0.110458	0.158	0.061	1	MAP4K5	1.46797
IDH3B	0.0341777	-0.26554	0.189	0.316	1	IDH3B	1.46626
PTGDR	0.0342242	0.153389	0.526	0.342	1	PTGDR	1.46567
LRRFIP2	0.0342971	0.145488	0.189	0.088	1	LRRFIP2	1.46474
RUVBL2	0.0342999	0.149093	0.137	0.053	1	RUVBL2	1.46471
POLE4	0.0343555	0.153237	0.274	0.158	1	POLE4	1.464
SMC3	0.0344309	0.163838	0.611	0.465	1	SMC3	1.46305
KRT81	0.0345521	0.255195	0.284	0.158	1	KRT81	1.46153
RPL12	0.0345775	0.1399	1	0.974	1	RPL12	1.46121
ITGAX	0.0346735	0.344434	0.295	0.175	1	ITGAX	1.46
PMS2	0.0346916	0.226499	0.158	0.07	1	PMS2	1.45978
ACAT1	0.0349097	0.12811	0.179	0.079	1	ACAT1	1.45705
WSB2	0.0349409	0.183719	0.147	0.061	1	WSB2	1.45667
PFKP	0.0353762	0.190403	0.2	0.096	1	PFKP	1.45129
TMEM238	0.0355221	0.14389	0.253	0.132	1	TMEM238	1.4495
C9orf16	0.0355602	0.237144	0.684	0.544	1	C9orf16	1.44904
ZSWIM7	0.0356374	0.101217	0.189	0.088	1	ZSWIM7	1.44809
SPAST	0.0358203	0.236211	0.168	0.079	1	SPAST	1.44587
CAP1	0.035856	0.14114	0.758	0.649	1	CAP1	1.44544
ARID3A	0.0358728	-0.182322	0.042	0.123	1	ARID3A	1.44524
MED27	0.0358898	0.0938538	0.126	0.044	1	MED27	1.44503
APIP	0.0359018	-0.163697	0.053	0.14	1	APIP	1.44488
EIF3K	0.036024	-0.177806	0.747	0.772	1	EIF3K	1.44341
GSS	0.0362145	0.201257	0.189	0.096	1	GSS	1.44112
BORCS5	0.0363047	0.16126	0.137	0.053	1	BORCS5	1.44004
ZBED1	0.0363173	0.125766	0.168	0.07	1	ZBED1	1.43989
ZC3H8	0.0363578	0.240014	0.253	0.14	1	ZC3H8	1.4394
YIPF5	0.0364606	-0.249427	0.189	0.307	1	YIPF5	1.43818
USP39	0.0364895	0.169931	0.147	0.061	1	USP39	1.43783
TDG	0.0369701	0.230425	0.232	0.123	1	TDG	1.43215
PPIE	0.037002	0.128224	0.337	0.184	1	PPIE	1.43177
NBEAL2	0.0370521	0.165321	0.2	0.096	1	NBEAL2	1.43119
UBAC1	0.037401	-0.210599	0.074	0.167	1	UBAC1	1.42712
VPS35L	0.0374832	0.179511	0.105	0.035	1	VPS35L	1.42616
PTDSS1	0.0376557	0.21473	0.168	0.079	1	PTDSS1	1.42417
ANGPT2	0.037689	0.216094	0.147	0.061	1	ANGPT2	1.42379
DDX28	0.0379798	0.123575	0.137	0.053	1	DDX28	1.42045
CAMLG	0.038116	0.132983	0.474	0.307	1	CAMLG	1.41889
MT-ATP6	0.0381658	0.0772474	1	1	1	MT-ATP6	1.41833
TM2D3	0.0382624	0.15718	0.284	0.158	1	TM2D3	1.41723
PARP15	0.0384119	0.20837	0.168	0.079	1	PARP15	1.41553
RBBP8	0.0384654	0.126484	0.105	0.035	1	RBBP8	1.41493
MUC20-OT1	0.0386371	0.171098	0.305	0.175	1	MUC20-OT1	1.413
NDUFA8	0.0387334	0.23018	0.337	0.202	1	NDUFA8	1.41191
PCBD2	0.0388119	-0.17413	0.032	0.105	1	PCBD2	1.41104
ASCC2	0.0388171	0.155726	0.189	0.088	1	ASCC2	1.41098
TMA7	0.0388677	-0.156757	0.926	0.912	1	TMA7	1.41041
OCIAD1	0.0392849	0.206451	0.642	0.5	1	OCIAD1	1.40577
H1FX	0.0395553	-0.126362	0.537	0.702	1	H1FX	1.4028
EPC1	0.0395739	-0.312321	0.347	0.465	1	EPC1	1.40259
SELENOM	0.0396554	-0.199582	0.074	0.167	1	SELENOM	1.4017
EMC9	0.0397913	-0.143891	0.032	0.105	1	EMC9	1.40021
PPP6R2	0.0398463	0.146627	0.221	0.114	1	PPP6R2	1.39961
PBDC1	0.0398512	0.204608	0.358	0.228	1	PBDC1	1.39956
MAP2K6	0.0399797	0.137306	0.105	0.035	1	MAP2K6	1.39816
FAM204A	0.0401023	-0.22202	0.232	0.36	1	FAM204A	1.39683
GTF2H3	0.0401888	0.176249	0.147	0.061	1	GTF2H3	1.3959
ZSCAN26	0.0402888	-0.172454	0.032	0.105	1	ZSCAN26	1.39482
AKAP8L	0.0404025	0.205856	0.263	0.149	1	AKAP8L	1.39359
SNX5	0.0404411	0.158983	0.337	0.202	1	SNX5	1.39318
NAALADL1	0.040462	0.233805	0.2	0.105	1	NAALADL1	1.39295
ACTA2	0.0404955	0.14836	0.105	0.035	1	ACTA2	1.39259
SEC23B	0.0405092	0.159091	0.158	0.07	1	SEC23B	1.39245
FBXO2	0.0406153	0.129643	0.137	0.053	1	FBXO2	1.39131
PREP	0.0406153	0.118312	0.137	0.053	1	PREP	1.39131
PRKD3	0.0407811	0.119947	0.295	0.167	1	PRKD3	1.38954
MRPS18C	0.0408785	0.157234	0.379	0.246	1	MRPS18C	1.38851
ST3GAL2	0.0409593	0.190363	0.168	0.079	1	ST3GAL2	1.38765
OASL	0.041021	0.226115	0.316	0.175	1	OASL	1.38699
TRIM52	0.0411995	-0.214663	0.126	0.237	1	TRIM52	1.38511
LYRM1	0.0412215	-0.223873	0.074	0.167	1	LYRM1	1.38488
ZNF622	0.0414696	-0.208049	0.158	0.272	1	ZNF622	1.38227
HERC5	0.0414905	0.161668	0.147	0.061	1	HERC5	1.38205
PLAC8	0.0414942	-0.293605	0.316	0.421	1	PLAC8	1.38201
RBM15B	0.0415275	0.0990631	0.137	0.053	1	RBM15B	1.38166
LINC00672	0.0415442	0.197933	0.105	0.035	1	LINC00672	1.38149
OGFOD1	0.0415442	0.151844	0.105	0.035	1	OGFOD1	1.38149
TMEM69	0.0415442	0.125777	0.105	0.035	1	TMEM69	1.38149
LPCAT4	0.0415673	0.165458	0.168	0.079	1	LPCAT4	1.38125
MIDN	0.0418189	0.250367	0.358	0.246	1	MIDN	1.37863
AP5Z1	0.0419323	0.171405	0.147	0.061	1	AP5Z1	1.37745
NCL	0.0423588	0.195847	0.863	0.825	1	NCL	1.37306
TERF2	0.0424909	0.133869	0.2	0.096	1	TERF2	1.3717
AC025164.1	0.0428026	-0.227941	0.147	0.263	1	AC025164.1	1.36853
STIP1	0.0428778	0.197508	0.347	0.211	1	STIP1	1.36777
NECAP2	0.0429247	0.125851	0.463	0.307	1	NECAP2	1.36729
IKBKB	0.0430026	-0.260344	0.126	0.228	1	IKBKB	1.36651
NUP54	0.0430637	-0.242763	0.105	0.202	1	NUP54	1.36589
PQLC3	0.0432405	0.137216	0.221	0.114	1	PQLC3	1.36411
OPTN	0.0433431	0.190007	0.589	0.465	1	OPTN	1.36308
PFDN6	0.0434291	0.146732	0.337	0.202	1	PFDN6	1.36222
RNF138	0.0437394	0.129475	0.147	0.061	1	RNF138	1.35913
MRPL12	0.0437721	0.141896	0.232	0.123	1	MRPL12	1.3588
MKNK2	0.0437812	0.0966119	0.274	0.149	1	MKNK2	1.35871
TEN1	0.0440733	0.205869	0.126	0.053	1	TEN1	1.35582
PRPS1	0.0441382	0.162211	0.232	0.123	1	PRPS1	1.35518
FAM78A	0.044179	0.138197	0.295	0.175	1	FAM78A	1.35478
SENP2	0.0442669	0.106698	0.105	0.035	1	SENP2	1.35392
ILF3-DT	0.0443153	0.131526	0.253	0.132	1	ILF3-DT	1.35345
EIF5A	0.0446181	0.145651	0.716	0.57	1	EIF5A	1.35049
MT-CYB	0.0446853	0.107667	1	1	1	MT-CYB	1.34984
SDHC	0.0446961	0.171718	0.432	0.298	1	SDHC	1.34973
CDK12	0.0447368	0.27028	0.274	0.175	1	CDK12	1.34933
ITM2A	0.0447872	0.253626	0.547	0.404	1	ITM2A	1.34885
NKG7	0.0448073	0.189863	0.989	0.982	1	NKG7	1.34865
RNF166	0.0451172	-0.254835	0.284	0.412	1	RNF166	1.34566
DAPK2	0.0451735	0.212333	0.295	0.175	1	DAPK2	1.34512
TSPYL1	0.0453112	-0.282117	0.168	0.272	1	TSPYL1	1.34379
ALKBH2	0.0453974	0.0980564	0.105	0.035	1	ALKBH2	1.34297
NOP56	0.0454051	0.205803	0.389	0.281	1	NOP56	1.3429
PKN2	0.0454592	0.16726	0.263	0.149	1	PKN2	1.34238
PRPSAP1	0.0455244	0.165165	0.242	0.132	1	PRPSAP1	1.34176
ETFRF1	0.0456119	0.127174	0.147	0.061	1	ETFRF1	1.34092
GPATCH11	0.0459035	-0.226265	0.084	0.175	1	GPATCH11	1.33815
USP10	0.0459186	0.139893	0.211	0.105	1	USP10	1.33801
VARS	0.0459871	0.143764	0.116	0.044	1	VARS	1.33736
DPYSL2	0.0460963	0.232219	0.126	0.053	1	DPYSL2	1.33633
GALK2	0.0460963	-0.116497	0.042	0.123	1	GALK2	1.33633
UBE2G2	0.0462758	0.133614	0.337	0.202	1	UBE2G2	1.33465
TMEM161A	0.0464857	-0.226356	0.074	0.158	1	TMEM161A	1.33268
ATG16L1	0.0465521	0.137002	0.105	0.035	1	ATG16L1	1.33206
ELOB	0.0467239	0.172539	0.832	0.693	1	ELOB	1.33046
ATP5F1C	0.0468233	0.189932	0.568	0.43	1	ATP5F1C	1.32954
GDI1	0.0470602	0.104245	0.147	0.061	1	GDI1	1.32735
GPX4	0.0470803	-0.165148	0.705	0.763	1	GPX4	1.32716
GRK5	0.0471387	0.0984035	0.105	0.035	1	GRK5	1.32662
DCTN2	0.047561	0.267478	0.358	0.246	1	DCTN2	1.32275
MLLT11	0.0476402	0.14844	0.116	0.044	1	MLLT11	1.32203
LIMK1	0.0478002	0.179929	0.253	0.14	1	LIMK1	1.32057
TMEM109	0.0479663	0.200627	0.326	0.202	1	TMEM109	1.31906
PLSCR1	0.0479797	0.261137	0.316	0.202	1	PLSCR1	1.31894
CBX7	0.0480765	0.153123	0.168	0.079	1	CBX7	1.31807
ARPC4	0.0483891	0.153067	0.695	0.474	1	ARPC4	1.31525
NCOA7	0.0486256	0.147634	0.295	0.175	1	NCOA7	1.31314
MT-CO3	0.0488724	0.0866749	1	1	1	MT-CO3	1.31094
SLC41A3	0.0489358	0.0579558	0.105	0.035	1	SLC41A3	1.31037
SMC5	0.0491799	0.161378	0.326	0.193	1	SMC5	1.30821
PIGP	0.0493246	0.194038	0.263	0.158	1	PIGP	1.30694
ENDOD1	0.049343	0.156162	0.116	0.044	1	ENDOD1	1.30677
HNRNPA1P48	0.049343	0.124895	0.116	0.044	1	HNRNPA1P48	1.30677
TSEN34	0.0493521	-0.256402	0.116	0.211	1	TSEN34	1.30669
SPECC1	0.0494701	-0.179482	0.053	0.132	1	SPECC1	1.30566
ERCC3	0.0495475	0.0813516	0.105	0.035	1	ERCC3	1.30498
NXPE3	0.0497808	-0.174817	0.063	0.149	1	NXPE3	1.30294
HDAC5	0.0499938	-0.176062	0.053	0.132	1	HDAC5	1.30108
UBE3B	0.0500052	0.0733522	0.137	0.053	1	UBE3B	1.30098
TMEM245	0.0502747	0.187422	0.232	0.132	1	TMEM245	1.29865
AP4E1	0.0503309	0.141444	0.147	0.061	1	AP4E1	1.29817
ZNF605	0.0505063	0.182112	0.116	0.044	1	ZNF605	1.29665
MRPL14	0.0505468	0.168827	0.432	0.298	1	MRPL14	1.29631
GIMAP7	0.0506939	-0.201119	0.905	0.939	1	GIMAP7	1.29504
TRAPPC6A	0.050758	0.156424	0.411	0.272	1	TRAPPC6A	1.2945
ELMO2	0.0507901	0.0705134	0.105	0.035	1	ELMO2	1.29422
ZNF136	0.05091	0.167316	0.168	0.079	1	ZNF136	1.2932
ATXN10	0.0510042	0.186821	0.4	0.272	1	ATXN10	1.29239
CDK13	0.0510254	-0.23831	0.389	0.509	1	CDK13	1.29221
DTX2	0.0510919	0.0606095	0.137	0.053	1	DTX2	1.29165
TRAPPC2	0.0512923	0.136289	0.253	0.14	1	TRAPPC2	1.28995
UGDH	0.05142	-0.190973	0.042	0.114	1	UGDH	1.28887
ARF5	0.0514708	0.140682	0.463	0.316	1	ARF5	1.28844
SURF4	0.0515208	0.253217	0.337	0.228	1	SURF4	1.28802
OTUD4	0.0515295	0.116143	0.158	0.07	1	OTUD4	1.28794
SLAMF7	0.0517314	0.227517	0.463	0.307	1	SLAMF7	1.28625
FAM214A	0.0518944	-0.245133	0.137	0.237	1	FAM214A	1.28488
EIF4G2	0.0518961	0.13189	0.621	0.456	1	EIF4G2	1.28487
RBM19	0.0520026	-0.214312	0.042	0.114	1	RBM19	1.28397
DYNLL2	0.0520384	0.127582	0.158	0.07	1	DYNLL2	1.28368
SMAP1	0.052095	-0.280839	0.242	0.351	1	SMAP1	1.2832
CEP97	0.0522943	0.129165	0.116	0.044	1	CEP97	1.28155
XPA	0.0523823	0.161687	0.347	0.211	1	XPA	1.28082
DUSP2	0.0526468	-0.246978	0.242	0.36	1	DUSP2	1.27863
TMEM161B-AS1	0.052722	0.141666	0.179	0.088	1	TMEM161B-AS1	1.27801
SPAG7	0.0527313	0.141637	0.421	0.263	1	SPAG7	1.27793
NAP1L4	0.0529548	0.152825	0.663	0.482	1	NAP1L4	1.27609
JUND	0.0529563	0.162667	0.884	0.851	1	JUND	1.27608
LRPPRC	0.0530519	-0.194493	0.095	0.184	1	LRPPRC	1.2753
2020-03-06	0.0530579	-0.206161	0.168	0.281	1	2020-03-06	1.27525
MAP9	0.0533292	-0.155199	0.063	0.149	1	MAP9	1.27303
C16orf72	0.0534254	-0.28285	0.126	0.228	1	C16orf72	1.27225
PCBP1	0.0534284	0.161377	0.747	0.632	1	PCBP1	1.27223
KYAT3	0.0535154	0.117906	0.116	0.044	1	KYAT3	1.27152
RASA2	0.0537173	0.199559	0.326	0.211	1	RASA2	1.26989
CLP1	0.0541349	0.130382	0.116	0.044	1	CLP1	1.26652
NDUFC1	0.0541582	0.173902	0.389	0.263	1	NDUFC1	1.26634
MRPS25	0.0542459	0.151507	0.221	0.114	1	MRPS25	1.26563
MTPN	0.0543984	0.204938	0.463	0.325	1	MTPN	1.26441
PSME2	0.0544266	0.154821	0.811	0.693	1	PSME2	1.26419
DENR	0.0548245	0.199915	0.274	0.167	1	DENR	1.26103
ZCCHC8	0.0549041	-0.264469	0.074	0.158	1	ZCCHC8	1.2604
ACLY	0.0549043	0.120638	0.168	0.079	1	ACLY	1.26039
SPATA33	0.054987	0.128917	0.126	0.053	1	SPATA33	1.25974
ITGA1	0.0550559	0.302166	0.495	0.368	1	ITGA1	1.2592
PAWR	0.0555872	0.159994	0.126	0.053	1	PAWR	1.25503
SIVA1	0.0560028	0.197227	0.611	0.456	1	SIVA1	1.25179
SAYSD1	0.0560293	0.120318	0.116	0.044	1	SAYSD1	1.25159
HERC2	0.0561965	0.186842	0.295	0.175	1	HERC2	1.25029
KIAA1671	0.0566729	0.118599	0.116	0.044	1	KIAA1671	1.24662
MT-CO1	0.0567298	0.0812174	1	1	1	MT-CO1	1.24619
TPM3	0.0567887	0.162933	0.884	0.772	1	TPM3	1.24574
HSCB	0.0568039	0.142229	0.126	0.053	1	HSCB	1.24562
RFC1	0.0569182	0.162621	0.432	0.281	1	RFC1	1.24475
LRRC58	0.0570198	-0.155311	0.084	0.175	1	LRRC58	1.24397
CDCA7	0.0574205	0.155514	0.126	0.053	1	CDCA7	1.24093
PSMD1	0.0574825	0.162894	0.284	0.175	1	PSMD1	1.24046
TOR1A	0.057819	0.20983	0.326	0.202	1	TOR1A	1.23793
STX11	0.0578269	0.176725	0.137	0.061	1	STX11	1.23787
CHCHD2	0.0579027	0.157686	0.926	0.807	1	CHCHD2	1.2373
MMAB	0.0579785	0.0789083	0.116	0.044	1	MMAB	1.23673
DUT	0.0580144	0.315069	0.368	0.254	1	DUT	1.23646
AC093010.2	0.0580427	0.157593	0.126	0.053	1	AC093010.2	1.23625
SNRPG	0.0581434	0.197016	0.611	0.474	1	SNRPG	1.2355
SDF2	0.0581811	0.204637	0.389	0.272	1	SDF2	1.23522
PIGF	0.0582001	0.177899	0.158	0.079	1	PIGF	1.23508
RAD17	0.0585755	0.162622	0.221	0.123	1	RAD17	1.23228
TMEM70	0.0585755	0.140198	0.221	0.123	1	TMEM70	1.23228
LINC02084	0.0586106	0.123483	0.168	0.079	1	LINC02084	1.23202
PSMB7	0.058646	0.191873	0.484	0.351	1	PSMB7	1.23176
HDHD2	0.0586705	0.13793	0.126	0.053	1	HDHD2	1.23158
ARRDC3	0.0589498	-0.297054	0.126	0.219	1	ARRDC3	1.22952
ERN1	0.0590744	-0.140375	0.084	0.175	1	ERN1	1.2286
WDR46	0.0592777	0.201422	0.284	0.184	1	WDR46	1.22711
AZIN1	0.0598344	0.156199	0.179	0.088	1	AZIN1	1.22305
GOLT1B	0.0598434	0.116797	0.211	0.114	1	GOLT1B	1.22298
BRAT1	0.059943	0.134573	0.126	0.053	1	BRAT1	1.22226
ENO1	0.060319	0.198517	0.747	0.658	1	ENO1	1.21955
KDM4C	0.0605403	-0.189958	0.074	0.158	1	KDM4C	1.21796
C1orf43	0.0606317	0.148148	0.326	0.202	1	C1orf43	1.2173
LAPTM4B	0.0607552	-0.121912	0.042	0.114	1	LAPTM4B	1.21642
EIF3J-DT	0.0607631	-0.325726	0.179	0.272	1	EIF3J-DT	1.21636
NOP14	0.060833	0.11627	0.211	0.114	1	NOP14	1.21586
PCSK7	0.0610201	0.133078	0.674	0.465	1	PCSK7	1.21453
NCBP2	0.0611264	-0.218419	0.211	0.316	1	NCBP2	1.21377
CALR	0.0614267	0.157391	0.737	0.57	1	CALR	1.21164
MSH6	0.0617827	0.126622	0.232	0.132	1	MSH6	1.20913
AATF	0.0618188	0.140091	0.347	0.228	1	AATF	1.20888
SEPHS1	0.0618945	0.120445	0.126	0.053	1	SEPHS1	1.20835
ATAD2	0.0619516	0.216356	0.221	0.123	1	ATAD2	1.20795
SF3B5	0.0619581	0.170522	0.705	0.544	1	SF3B5	1.2079
XCL1	0.0621595	0.215916	0.726	0.588	1	XCL1	1.20649
THOC6	0.06218	0.161826	0.168	0.088	1	THOC6	1.20635
ARL16	0.0624141	0.172432	0.263	0.158	1	ARL16	1.20472
CAST	0.0625443	-0.231659	0.463	0.579	1	CAST	1.20381
WDR75	0.0627437	0.129762	0.137	0.061	1	WDR75	1.20243
CD3E	0.062809	0.143581	0.411	0.289	1	CD3E	1.20198
GLS	0.0630271	0.140543	0.379	0.246	1	GLS	1.20047
AL353194.1	0.0633819	0.133712	0.137	0.061	1	AL353194.1	1.19803
RERE	0.0633976	-0.221188	0.084	0.167	1	RERE	1.19793
TIMM13	0.0634382	0.104728	0.368	0.237	1	TIMM13	1.19765
PNPLA6	0.0634692	-0.141827	0.042	0.114	1	PNPLA6	1.19744
PRF1	0.0636226	0.238786	0.705	0.623	1	PRF1	1.19639
RANGAP1	0.0637355	0.0931679	0.158	0.07	1	RANGAP1	1.19562
CD53	0.0638465	0.0953733	0.758	0.623	1	CD53	1.19486
ABR	0.0638983	0.11443	0.126	0.053	1	ABR	1.19451
NBAS	0.0638983	0.108805	0.126	0.053	1	NBAS	1.19451
TPRG1L	0.0640255	0.111069	0.137	0.061	1	TPRG1L	1.19365
SNX19	0.0641632	-0.129679	0.042	0.114	1	SNX19	1.19271
CCNL2	0.0643855	-0.216057	0.105	0.193	1	CCNL2	1.19121
ZNF764	0.0645781	0.101424	0.126	0.053	1	ZNF764	1.18991
RAB3IP	0.0646199	0.180199	0.147	0.07	1	RAB3IP	1.18963
TSPAN14	0.0647901	-0.232173	0.221	0.325	1	TSPAN14	1.18849
TBC1D1	0.0648808	0.189031	0.232	0.14	1	TBC1D1	1.18788
KLRC3	0.0649547	0.0301752	0.158	0.07	1	KLRC3	1.18739
DTNBP1	0.064972	0.129658	0.221	0.123	1	DTNBP1	1.18727
COA1	0.065075	-0.225263	0.463	0.535	1	COA1	1.18659
MKNK1	0.0651256	0.183553	0.158	0.079	1	MKNK1	1.18625
JAK3	0.0652133	0.163815	0.337	0.228	1	JAK3	1.18566
EDEM2	0.0652464	0.152613	0.147	0.07	1	EDEM2	1.18544
LRRC42	0.0652638	0.115128	0.126	0.053	1	LRRC42	1.18533
CHCHD5	0.0654672	0.18068	0.358	0.237	1	CHCHD5	1.18398
MKKS	0.0656258	0.177345	0.168	0.088	1	MKKS	1.18293
CELF2	0.065724	0.219891	0.705	0.535	1	CELF2	1.18228
CSDE1	0.0657668	-0.16388	0.484	0.596	1	CSDE1	1.18199
SIGMAR1	0.0659555	0.0962953	0.126	0.053	1	SIGMAR1	1.18075
ADPRHL2	0.0659991	0.104401	0.189	0.096	1	ADPRHL2	1.18046
TTC9C	0.0662563	-0.198392	0.084	0.167	1	TTC9C	1.17877
SF3B6	0.0666952	-0.224961	0.526	0.588	1	SF3B6	1.17591
ARHGEF3	0.0667322	0.193853	0.358	0.237	1	ARHGEF3	1.17566
OTULIN	0.0667504	0.14206	0.358	0.246	1	OTULIN	1.17555
DHX30	0.0668348	-0.184624	0.095	0.184	1	DHX30	1.175
ARRDC2	0.0673975	-0.136081	0.095	0.184	1	ARRDC2	1.17136
AK2	0.0680013	-0.0637413	0.053	0.132	1	AK2	1.16748
POLM	0.0683199	0.11454	0.179	0.088	1	POLM	1.16545
TMEM170A	0.068574	0.150473	0.274	0.167	1	TMEM170A	1.16384
NIPSNAP1	0.068619	-0.222112	0.084	0.167	1	NIPSNAP1	1.16356
ORMDL3	0.0687829	0.0933409	0.126	0.053	1	ORMDL3	1.16252
WDR1	0.0689224	0.235678	0.421	0.289	1	WDR1	1.16164
SSR3	0.0689424	0.135589	0.432	0.298	1	SSR3	1.16151
ATP5F1B	0.068978	0.202212	0.526	0.421	1	ATP5F1B	1.16129
ZNF330	0.0691203	0.218436	0.211	0.123	1	ZNF330	1.16039
TMEM101	0.0692927	0.169125	0.2	0.114	1	TMEM101	1.15931
POLR2I	0.069317	0.0642018	0.295	0.167	1	POLR2I	1.15916
COMMD7	0.0693399	0.0701968	0.526	0.36	1	COMMD7	1.15902
PIBF1	0.0695227	0.0815608	0.179	0.088	1	PIBF1	1.15787
EP300	0.0700206	0.230266	0.337	0.228	1	EP300	1.15477
COX19	0.070292	0.0960677	0.263	0.149	1	COX19	1.15309
TMEM41B	0.0705975	0.0881287	0.274	0.149	1	TMEM41B	1.15121
CEBPZ	0.0709321	0.162459	0.305	0.193	1	CEBPZ	1.14916
PUSL1	0.0709682	0.0896483	0.126	0.053	1	PUSL1	1.14894
IFIT5	0.0709682	0.0787954	0.126	0.053	1	IFIT5	1.14894
OS9	0.0710369	0.13898	0.274	0.167	1	OS9	1.14852
SUMO3	0.071298	0.165536	0.389	0.263	1	SUMO3	1.14692
C22orf39	0.0715017	0.178253	0.179	0.096	1	C22orf39	1.14568
SH2D1B	0.0715618	0.232603	0.368	0.263	1	SH2D1B	1.14532
AUP1	0.071769	0.139257	0.358	0.237	1	AUP1	1.14406
GFM1	0.0720383	0.189049	0.189	0.105	1	GFM1	1.14244
ARFGAP3	0.0722356	-0.190665	0.189	0.298	1	ARFGAP3	1.14125
KCNK6	0.0724564	0.110329	0.126	0.053	1	KCNK6	1.13992
EIF1AD	0.0724564	0.0996186	0.126	0.053	1	EIF1AD	1.13992
TIAM1	0.0726361	-0.161929	0.095	0.184	1	TIAM1	1.13885
IPO9	0.0727373	-0.25512	0.095	0.175	1	IPO9	1.13824
TMCO1	0.0729478	0.119838	0.558	0.368	1	TMCO1	1.13699
CCDC57	0.0730509	0.134703	0.253	0.149	1	CCDC57	1.13637
PDIA4	0.0731371	0.182516	0.253	0.158	1	PDIA4	1.13586
TP53TG1	0.0732101	0.0642255	0.126	0.053	1	TP53TG1	1.13543
DLD	0.0732385	-0.144422	0.095	0.184	1	DLD	1.13526
SLC2A4RG	0.0733514	0.177834	0.179	0.096	1	SLC2A4RG	1.13459
DIS3L	0.0735357	-0.128449	0.053	0.123	1	DIS3L	1.1335
CNOT10	0.073856	0.131376	0.147	0.07	1	CNOT10	1.13161
USF3	0.073856	-0.175396	0.063	0.14	1	USF3	1.13161
UBE2M	0.0738741	0.117307	0.537	0.395	1	UBE2M	1.13151
RGL4	0.0739294	0.286631	0.253	0.158	1	RGL4	1.13118
CIB1	0.0741419	0.179444	0.737	0.632	1	CIB1	1.12994
EPC2	0.074555	0.141821	0.147	0.07	1	EPC2	1.12752
DNAJC30	0.0746062	0.153427	0.179	0.096	1	DNAJC30	1.12723
FTL	0.0746603	-0.116361	0.937	0.982	1	FTL	1.12691
SNAPC5	0.0748823	0.150855	0.232	0.14	1	SNAPC5	1.12562
GRHPR	0.0750078	0.106265	0.263	0.158	1	GRHPR	1.12489
AMMECR1	0.0750772	0.0915728	0.137	0.061	1	AMMECR1	1.12449
SAMD9	0.0753388	-0.257546	0.495	0.57	1	SAMD9	1.12298
DCUN1D5	0.0755347	0.179313	0.253	0.158	1	DCUN1D5	1.12185
BOLA3	0.0755698	0.101996	0.211	0.114	1	BOLA3	1.12165
NIPSNAP3A	0.075688	0.143328	0.189	0.105	1	NIPSNAP3A	1.12097
EIF4A1	0.0760938	0.220832	0.411	0.289	1	EIF4A1	1.11865
NGDN	0.0763108	0.181772	0.189	0.105	1	NGDN	1.11741
IGKC	0.0764399	-0.310229	0.379	0.474	1	IGKC	1.11668
ATAD3B	0.0765594	0.150509	0.105	0.044	1	ATAD3B	1.116
NDUFS8	0.0765808	0.116249	0.684	0.526	1	NDUFS8	1.11588
UNK	0.0766847	-0.110161	0.063	0.14	1	UNK	1.11529
EEF1A1	0.0767501	-0.0855618	1	1	1	EEF1A1	1.11492
ZNF506	0.0768109	0.145165	0.274	0.175	1	ZNF506	1.11458
NDUFA1	0.0768376	0.200446	0.611	0.482	1	NDUFA1	1.11443
HELZ	0.0768615	-0.193434	0.368	0.474	1	HELZ	1.11429
MOB4	0.0769482	0.149715	0.337	0.219	1	MOB4	1.1138
EZR	0.0770194	-0.211811	0.537	0.632	1	EZR	1.1134
HEXA	0.0771277	0.168532	0.4	0.281	1	HEXA	1.11279
CYCS	0.0771292	0.156944	0.537	0.377	1	CYCS	1.11278
LMO4	0.0771393	-0.251645	0.263	0.368	1	LMO4	1.11272
TBCD	0.0773117	0.146538	0.337	0.211	1	TBCD	1.11175
TNRC6C	0.0773406	-0.209917	0.168	0.263	1	TNRC6C	1.11159
BTG2	0.0773884	0.157653	0.442	0.316	1	BTG2	1.11132
IMMP1L	0.0774702	0.133689	0.158	0.079	1	IMMP1L	1.11087
FABP5	0.0775892	0.155784	0.168	0.088	1	FABP5	1.1102
FAF2	0.0777292	-0.188591	0.116	0.202	1	FAF2	1.10942
PPP2R5C	0.0778027	-0.202195	0.474	0.561	1	PPP2R5C	1.10901
DYNLRB1	0.0781397	0.20393	0.6	0.5	1	DYNLRB1	1.10713
QTRT1	0.0781708	0.177158	0.116	0.053	1	QTRT1	1.10696
ADD3	0.0782733	-0.179344	0.147	0.246	1	ADD3	1.10639
ME2	0.078466	-0.234926	0.2	0.298	1	ME2	1.10532
SUCO	0.0787729	-0.175716	0.105	0.193	1	SUCO	1.10362
HDGFL2	0.0788306	0.0898447	0.263	0.149	1	HDGFL2	1.10331
GATD1	0.0788637	0.0991583	0.147	0.07	1	GATD1	1.10312
POMC	0.078903	0.10403	0.211	0.114	1	POMC	1.10291
LBH	0.0790397	0.130021	0.537	0.412	1	LBH	1.10215
RFC4	0.0791554	0.16961	0.105	0.044	1	RFC4	1.10152
WAS	0.079286	0.137761	0.411	0.289	1	WAS	1.1008
PIK3CG	0.0793911	0.186582	0.253	0.158	1	PIK3CG	1.10023
PGAM1	0.07943	0.0899802	0.484	0.316	1	PGAM1	1.10002
CD59	0.0794873	0.135675	0.189	0.105	1	CD59	1.0997
TC2N	0.0795589	0.129941	0.347	0.237	1	TC2N	1.09931
ORC4	0.0796634	-0.135611	0.053	0.123	1	ORC4	1.09874
CHD8	0.0796894	-0.191296	0.179	0.281	1	CHD8	1.0986
SNX4	0.0798017	0.15236	0.179	0.096	1	SNX4	1.09799
UBE2I	0.080058	0.0782178	0.768	0.64	1	UBE2I	1.0966
NASP	0.0800757	0.249722	0.505	0.377	1	NASP	1.0965
PLEC	0.0803217	-0.262719	0.084	0.158	1	PLEC	1.09517
ZNF655	0.0805686	0.030464	0.295	0.175	1	ZNF655	1.09383
MTMR6	0.0806612	0.192927	0.116	0.053	1	MTMR6	1.09334
ANP32E	0.080674	-0.217918	0.358	0.43	1	ANP32E	1.09327
RIC3	0.0809255	0.118467	0.105	0.044	1	RIC3	1.09191
KDM2A	0.0811327	-0.206215	0.168	0.263	1	KDM2A	1.0908
UBE2K	0.0813461	0.202927	0.326	0.219	1	UBE2K	1.08966
BRD4	0.0814099	0.152844	0.389	0.272	1	BRD4	1.08932
STX18	0.0814923	-0.134749	0.084	0.167	1	STX18	1.08888
SRPRA	0.081769	-0.27215	0.242	0.333	1	SRPRA	1.08741
CERS2	0.0817979	0.18673	0.316	0.211	1	CERS2	1.08726
SMC6	0.0819433	0.157971	0.2	0.114	1	SMC6	1.08649
MAP3K4	0.0821052	0.148346	0.189	0.105	1	MAP3K4	1.08563
ATF1	0.0821052	0.139525	0.189	0.105	1	ATF1	1.08563
GBP4	0.0823592	-0.190971	0.295	0.412	1	GBP4	1.08429
MED16	0.0824219	0.0971179	0.168	0.088	1	MED16	1.08396
TUBA1A	0.082442	0.270379	0.526	0.395	1	TUBA1A	1.08385
YPEL5	0.0824818	0.181908	0.337	0.219	1	YPEL5	1.08364
DENND2D	0.0825011	0.145744	0.547	0.404	1	DENND2D	1.08354
ATP8A1	0.0825245	0.0914932	0.358	0.237	1	ATP8A1	1.08342
CBR1	0.082531	0.120461	0.253	0.149	1	CBR1	1.08338
HMGCL	0.0828795	-0.129528	0.053	0.123	1	HMGCL	1.08155
AC097376.2	0.0831318	0.145605	0.168	0.088	1	AC097376.2	1.08023
CARD11	0.0832307	-0.179341	0.084	0.167	1	CARD11	1.07972
MIF4GD	0.0833176	-0.252775	0.168	0.254	1	MIF4GD	1.07926
IDNK	0.083374	-0.17083	0.042	0.105	1	IDNK	1.07897
ECD	0.0841123	0.193894	0.126	0.061	1	ECD	1.07514
ITCH	0.0842605	0.16059	0.221	0.132	1	ITCH	1.07438
MYL6	0.0843081	0.112232	1	0.991	1	MYL6	1.07413
LPGAT1	0.0843619	0.101135	0.347	0.219	1	LPGAT1	1.07385
PPP1R11	0.0843661	0.139589	0.263	0.167	1	PPP1R11	1.07383
NUDT22	0.0845944	0.169333	0.389	0.272	1	NUDT22	1.07266
R3HDM4	0.08489	-0.175809	0.126	0.211	1	R3HDM4	1.07114
GCDH	0.0851	0.0767459	0.221	0.123	1	GCDH	1.07007
PIK3CD	0.0853483	0.12672	0.379	0.263	1	PIK3CD	1.0688
2020-03-05	0.0854481	0.112439	0.158	0.079	1	2020-03-05	1.0683
TNFSF13B	0.0854755	0.165196	0.189	0.105	1	TNFSF13B	1.06816
ATP1B3	0.0856336	0.12086	0.337	0.219	1	ATP1B3	1.06736
WRNIP1	0.0860727	-0.139078	0.042	0.105	1	WRNIP1	1.06513
SMUG1	0.0860727	-0.158947	0.042	0.105	1	SMUG1	1.06513
S100A4	0.0861254	0.206796	0.905	0.86	1	S100A4	1.06487
SP140	0.0861476	0.192109	0.316	0.202	1	SP140	1.06476
TECPR1	0.0861999	-0.132909	0.053	0.123	1	TECPR1	1.06449
SLC39A4	0.0862051	0.158916	0.158	0.079	1	SLC39A4	1.06447
HELLS	0.0866224	0.206789	0.126	0.061	1	HELLS	1.06237
UBE2B	0.0866692	-0.232894	0.453	0.526	1	UBE2B	1.06214
RABEP1	0.0867357	0.163189	0.232	0.14	1	RABEP1	1.0618
PPT1	0.0867559	0.118021	0.168	0.088	1	PPT1	1.0617
GDAP2	0.0869877	-0.14627	0.042	0.105	1	GDAP2	1.06054
CEP68	0.0871605	0.156839	0.137	0.07	1	CEP68	1.05968
SLU7	0.0872533	0.13516	0.316	0.202	1	SLU7	1.05922
CREB3L2	0.0873639	-0.300118	0.126	0.202	1	CREB3L2	1.05867
DUSP12	0.0874958	0.110037	0.168	0.088	1	DUSP12	1.05801
ZNF43	0.0874958	0.10912	0.168	0.088	1	ZNF43	1.05801
MICU2	0.0876042	-0.187499	0.211	0.307	1	MICU2	1.05748
MYO5A	0.0876183	0.180597	0.116	0.053	1	MYO5A	1.05741
GTF2E2	0.0876913	0.120314	0.221	0.123	1	GTF2E2	1.05704
BCL7C	0.0879985	0.121704	0.474	0.342	1	BCL7C	1.05552
COLGALT1	0.0880885	0.0729257	0.147	0.07	1	COLGALT1	1.05508
CPSF6	0.0881944	0.12989	0.253	0.158	1	CPSF6	1.05456
ZNF701	0.0882675	0.0794942	0.211	0.114	1	ZNF701	1.0542
FDFT1	0.0882699	0.0977125	0.274	0.167	1	FDFT1	1.05419
VRK2	0.0883298	0.111673	0.105	0.044	1	VRK2	1.05389
NUDC	0.0884755	0.138525	0.558	0.412	1	NUDC	1.05318
SSU72	0.0884966	0.17316	0.558	0.439	1	SSU72	1.05307
INO80C	0.088521	0.160905	0.116	0.053	1	INO80C	1.05295
CLEC2B	0.0886083	0.165096	0.895	0.851	1	CLEC2B	1.05253
RDH14	0.0888082	-0.234136	0.158	0.237	1	RDH14	1.05155
NDUFC2	0.0888155	0.172285	0.716	0.579	1	NDUFC2	1.05151
FBXW5	0.0888427	0.141096	0.411	0.298	1	FBXW5	1.05138
GLRX	0.0888868	0.221978	0.463	0.342	1	GLRX	1.05116
ARPC1A	0.0889568	0.113484	0.189	0.105	1	ARPC1A	1.05082
CCNDBP1	0.0889589	0.112723	0.632	0.482	1	CCNDBP1	1.05081
RRP15	0.0891874	0.177534	0.147	0.079	1	RRP15	1.0497
TIMM23B	0.0892926	0.11605	0.105	0.044	1	TIMM23B	1.04918
CHORDC1	0.0894029	0.17166	0.316	0.211	1	CHORDC1	1.04865
CTDSPL2	0.089526	-0.197156	0.105	0.184	1	CTDSPL2	1.04805
ARHGAP35	0.089599	0.159674	0.179	0.096	1	ARHGAP35	1.0477
PRDM2	0.0896849	0.158085	0.316	0.211	1	PRDM2	1.04728
SF3A2	0.0900639	0.14897	0.221	0.132	1	SF3A2	1.04545
PTPN1	0.0900675	0.108798	0.316	0.202	1	PTPN1	1.04543
UPP1	0.0901069	-0.281023	0.4	0.474	1	UPP1	1.04524
DTX3	0.0902638	0.111154	0.105	0.044	1	DTX3	1.04449
RBBP6	0.0905179	-0.235439	0.274	0.36	1	RBBP6	1.04327
RNFT1	0.0907835	-0.169633	0.095	0.175	1	RNFT1	1.04199
EHMT1	0.0909845	-0.237127	0.189	0.281	1	EHMT1	1.04103
MOB1A	0.0910555	-0.230183	0.442	0.509	1	MOB1A	1.04069
BAZ1B	0.0910894	0.0805312	0.4	0.281	1	BAZ1B	1.04053
RAPGEF6	0.0912289	0.160576	0.211	0.123	1	RAPGEF6	1.03987
RFC2	0.091298	0.17199	0.253	0.158	1	RFC2	1.03954
ZNF107	0.0913735	0.169795	0.2	0.114	1	ZNF107	1.03918
MAPK9	0.0916004	0.158901	0.147	0.079	1	MAPK9	1.0381
ATR	0.0916816	-0.112993	0.042	0.105	1	ATR	1.03772
SSH1	0.0920428	-0.173501	0.084	0.158	1	SSH1	1.03601
KIF21A	0.0921113	0.20792	0.274	0.184	1	KIF21A	1.03569
MXD4	0.0921878	0.0760548	0.516	0.36	1	MXD4	1.03533
EIF2B2	0.0922523	0.217268	0.179	0.105	1	EIF2B2	1.03502
ZNF800	0.0931226	-0.23997	0.211	0.298	1	ZNF800	1.03095
PMM1	0.0931475	0.114733	0.116	0.053	1	PMM1	1.03083
ORC2	0.0931475	0.10048	0.116	0.053	1	ORC2	1.03083
PIGM	0.0932286	0.0797675	0.105	0.044	1	PIGM	1.03045
NAMPT	0.0932841	0.135309	0.189	0.105	1	NAMPT	1.03019
MCRIP2	0.0932841	0.120839	0.189	0.105	1	MCRIP2	1.03019
CAT	0.0932841	0.0763861	0.189	0.105	1	CAT	1.03019
SP3	0.0936387	-0.255982	0.179	0.263	1	SP3	1.02854
SMIM12	0.093662	0.111904	0.368	0.246	1	SMIM12	1.02844
H2AFZ	0.0937439	0.185869	0.768	0.658	1	H2AFZ	1.02806
DCAF5	0.0938746	0.144781	0.232	0.14	1	DCAF5	1.02745
C12orf65	0.0940047	0.0823362	0.4	0.281	1	C12orf65	1.02685
AP002387.2	0.0940841	-0.240092	0.095	0.167	1	AP002387.2	1.02648
COX15	0.0940957	0.123026	0.116	0.053	1	COX15	1.02643
SGK3	0.0940957	0.0976794	0.116	0.053	1	SGK3	1.02643
FLNA	0.0942135	0.148364	0.389	0.272	1	FLNA	1.02589
PPIG	0.0942282	0.154915	0.642	0.465	1	PPIG	1.02582
SORL1	0.0944088	-0.156143	0.211	0.307	1	SORL1	1.02499
LAMTOR1	0.094426	-0.260956	0.442	0.509	1	LAMTOR1	1.02491
LENG1	0.0945464	0.141944	0.232	0.14	1	LENG1	1.02436
GIGYF2	0.0947127	0.126851	0.274	0.167	1	GIGYF2	1.02359
CCND2	0.0949718	0.186816	0.526	0.404	1	CCND2	1.02241
FCMR	0.0950193	-0.197291	0.2	0.298	1	FCMR	1.02219
BLVRA	0.0950516	0.142619	0.116	0.053	1	BLVRA	1.02204
UROD	0.0950516	0.109372	0.116	0.053	1	UROD	1.02204
PAPOLG	0.0951686	-0.163122	0.063	0.132	1	PAPOLG	1.02151
HEATR5B	0.0952481	0.0788128	0.105	0.044	1	HEATR5B	1.02114
CCT2	0.0952857	0.123238	0.442	0.316	1	CCT2	1.02097
AMD1	0.0952935	0.11144	0.274	0.175	1	AMD1	1.02094
RBM12	0.0954143	0.149337	0.211	0.123	1	RBM12	1.02039
MUM1	0.095646	-0.183022	0.179	0.272	1	MUM1	1.01933
SMURF2	0.0959806	-0.300181	0.168	0.246	1	SMURF2	1.01782
NUP205	0.0962709	0.087908	0.105	0.044	1	NUP205	1.0165
MTERF1	0.0962709	0.0769157	0.105	0.044	1	MTERF1	1.0165
USP3	0.0965161	0.132264	0.368	0.254	1	USP3	1.0154
CHM	0.0965844	-0.251404	0.137	0.219	1	CHM	1.01509
ALG8	0.0967777	-0.167594	0.084	0.158	1	ALG8	1.01422
PPP1CA	0.0968928	0.191794	0.705	0.596	1	PPP1CA	1.01371
VHL	0.0968951	-0.22612	0.158	0.246	1	VHL	1.0137
C4orf3	0.0969772	0.139206	0.768	0.658	1	C4orf3	1.01333
TP53BP2	0.0969868	0.128405	0.116	0.053	1	TP53BP2	1.01329
SEM1	0.0969956	0.153242	0.621	0.509	1	SEM1	1.01325
C6orf48	0.0970158	-0.235074	0.389	0.456	1	C6orf48	1.01316
HSPD1	0.0973452	0.196655	0.484	0.351	1	HSPD1	1.01169
MRPL18	0.0973512	0.185747	0.337	0.237	1	MRPL18	1.01166
UNKL	0.0973834	0.0893128	0.158	0.079	1	UNKL	1.01152
REXO4	0.0974349	0.163379	0.147	0.079	1	REXO4	1.01129
ZNF544	0.0975851	-0.188648	0.084	0.158	1	ZNF544	1.01062
TUBA4A	0.0976447	0.118539	0.379	0.263	1	TUBA4A	1.01035
RPL24	0.0979221	-0.0881232	1	0.982	1	RPL24	1.00912
TOGARAM1	0.0979661	0.162457	0.116	0.053	1	TOGARAM1	1.00892
NBL1	0.0982306	0.124841	0.347	0.228	1	NBL1	1.00775
ZNF626	0.0983986	0.111277	0.168	0.088	1	ZNF626	1.00701
TMEM8A	0.0986291	0.113783	0.2	0.114	1	TMEM8A	1.00599
IRF8	0.098964	-0.192596	0.053	0.114	1	IRF8	1.00452
GIPC1	0.0990184	0.138965	0.211	0.123	1	GIPC1	1.00428
POLR2H	0.099177	0.101352	0.295	0.184	1	POLR2H	1.00359
GDF11	0.0992171	0.0973684	0.168	0.088	1	GDF11	1.00341
MTA1	0.0992477	-0.22067	0.116	0.193	1	MTA1	1.00328
RAB9A	0.0994046	-0.164	0.137	0.228	1	RAB9A	1.00259
ZNF217	0.0997387	-0.188517	0.242	0.333	1	ZNF217	1.00114
BLZF1	0.100094	0.144266	0.126	0.061	1	BLZF1	0.999592
CDC73	0.1001	-0.163958	0.137	0.228	1	CDC73	0.999564
SLC25A39	0.100329	0.15247	0.347	0.246	1	SLC25A39	0.998574
MAP3K14	0.10045	0.051832	0.105	0.044	1	MAP3K14	0.998048
RNASEH2B	0.100793	0.14756	0.358	0.254	1	RNASEH2B	0.996571
WDR59	0.1009	0.130065	0.147	0.079	1	WDR59	0.996109
ZAP70	0.100908	0.150781	0.4	0.281	1	ZAP70	0.996072
PPP1R12B	0.100911	-0.153305	0.053	0.114	1	PPP1R12B	0.996064
GPCPD1	0.100952	0.0784133	0.116	0.053	1	GPCPD1	0.995887
NUP88	0.101085	0.153133	0.168	0.096	1	NUP88	0.995314
ZNF276	0.101249	0.203317	0.211	0.132	1	ZNF276	0.994611
HCG18	0.101363	-0.232782	0.189	0.263	1	HCG18	0.99412
ZNF569	0.101518	0.0748471	0.105	0.044	1	ZNF569	0.993459
EIF2AK2	0.101651	0.0435133	0.337	0.219	1	EIF2AK2	0.992889
2020-09-11	0.101912	0.126818	0.263	0.167	1	2020-09-11	0.991774
DGAT1	0.101963	0.099453	0.116	0.053	1	DGAT1	0.991559
IFRD1	0.10236	-0.148333	0.063	0.132	1	IFRD1	0.989869
SH2D2A	0.102362	0.220902	0.474	0.342	1	SH2D2A	0.989861
RPL10	0.102429	-0.0782485	1	1	1	RPL10	0.989576
PDE4B	0.102669	0.203078	0.147	0.079	1	PDE4B	0.988561
KAT2B	0.102887	-0.180921	0.053	0.114	1	KAT2B	0.987638
AGPS	0.102887	-0.205884	0.053	0.114	1	AGPS	0.987638
TMEM260	0.102982	0.110738	0.116	0.053	1	TMEM260	0.98724
CD74	0.103075	0.0438884	0.695	0.5	1	CD74	0.986845
CEP295	0.103289	-0.140385	0.063	0.132	1	CEP295	0.985947
EMG1	0.103351	0.084296	0.295	0.193	1	EMG1	0.985685
ASCC3	0.103564	0.11204	0.242	0.149	1	ASCC3	0.984789
SETD2	0.103663	-0.26472	0.284	0.368	1	SETD2	0.984375
ESS2	0.104009	0.101691	0.116	0.053	1	ESS2	0.982929
C6orf203	0.104012	-0.173016	0.074	0.14	1	C6orf203	0.982917
RALGAPA2	0.104344	0.168634	0.158	0.088	1	RALGAPA2	0.981531
LUZP1	0.104573	-0.150757	0.358	0.447	1	LUZP1	0.980581
KCTD17	0.104694	0.138327	0.137	0.07	1	KCTD17	0.980077
IFI16	0.104729	0.130254	0.811	0.693	1	IFI16	0.979934
CALCOCO2	0.10481	0.192639	0.379	0.272	1	CALCOCO2	0.979598
FAM114A2	0.104858	-0.145508	0.126	0.211	1	FAM114A2	0.979397
BLOC1S5	0.104895	-0.157704	0.053	0.114	1	BLOC1S5	0.979246
SACS	0.104939	0.110899	0.126	0.061	1	SACS	0.979063
GGA2	0.105091	0.151557	0.232	0.14	1	GGA2	0.978432
NSUN2	0.105166	-0.14429	0.063	0.132	1	NSUN2	0.978124
GFI1	0.105521	0.194591	0.179	0.105	1	GFI1	0.976663
MKLN1	0.105521	0.169102	0.179	0.105	1	MKLN1	0.976663
NDUFA13	0.105688	0.11938	0.442	0.316	1	NDUFA13	0.975974
RNF149	0.105701	-0.165473	0.158	0.246	1	RNF149	0.975921
TBRG1	0.105995	0.129301	0.284	0.184	1	TBRG1	0.974713
OAS2	0.106928	0.0970498	0.179	0.096	1	OAS2	0.970909
YIPF1	0.106928	0.111092	0.126	0.061	1	YIPF1	0.970907
SCAMP1-AS1	0.106928	0.108006	0.126	0.061	1	SCAMP1-AS1	0.970907
WDFY2	0.10714	0.105058	0.116	0.053	1	WDFY2	0.97005
STK40	0.10714	0.0735875	0.116	0.053	1	STK40	0.97005
RTP4	0.107199	0.148644	0.147	0.079	1	RTP4	0.969807
RAB2A	0.107811	0.114315	0.495	0.36	1	RAB2A	0.967338
MSH3	0.107816	0.220857	0.168	0.096	1	MSH3	0.967315
FAM184B	0.107964	-0.19986	0.053	0.114	1	FAM184B	0.966719
C19orf70	0.108106	0.176126	0.526	0.43	1	C19orf70	0.966149
HDAC8	0.108124	0.132235	0.147	0.079	1	HDAC8	0.966077
C1orf21	0.108342	-0.230076	0.253	0.351	1	C1orf21	0.965205
HP1BP3	0.108422	0.128188	0.579	0.456	1	HP1BP3	0.964883
PDZD8	0.108516	0.137789	0.137	0.07	1	PDZD8	0.964505
ITGAE	0.10856	0.18922	0.579	0.465	1	ITGAE	0.96433
HEATR1	0.108765	0.124475	0.158	0.088	1	HEATR1	0.963511
PAN3	0.108773	0.0434961	0.158	0.079	1	PAN3	0.963478
H3F3A	0.108862	-0.0861786	1	0.982	1	H3F3A	0.963123
SEC62	0.10906	-0.208397	0.484	0.561	1	SEC62	0.962335
SLC25A42	0.109268	0.103102	0.116	0.053	1	SLC25A42	0.961508
AC118549.1	0.109268	0.0822718	0.116	0.053	1	AC118549.1	0.961508
WDR13	0.109268	0.0804085	0.116	0.053	1	WDR13	0.961508
EMC3	0.109357	0.122399	0.284	0.175	1	EMC3	0.961152
SNX27	0.109489	0.136984	0.137	0.07	1	SNX27	0.96063
AIFM1	0.109554	0.154977	0.168	0.096	1	AIFM1	0.960373
MRPL40	0.109578	-0.175712	0.242	0.342	1	MRPL40	0.960277
TAPBPL	0.109699	0.162711	0.179	0.105	1	TAPBPL	0.959798
MORF4L2	0.109786	0.177091	0.263	0.175	1	MORF4L2	0.959453
BRCA1	0.109968	0.0845879	0.126	0.061	1	BRCA1	0.958733
TST	0.11005	-0.143261	0.053	0.114	1	TST	0.95841
MRPL15	0.110134	0.157726	0.189	0.114	1	MRPL15	0.958077
RBM5	0.110164	0.192439	0.432	0.316	1	RBM5	0.957962
DDI2	0.110198	0.106877	0.221	0.132	1	DDI2	0.957825
HDAC3	0.110305	0.141406	0.221	0.14	1	HDAC3	0.957405
TMCC1	0.110383	0.0322067	0.105	0.044	1	TMCC1	0.957098
IVNS1ABP	0.11039	-0.23849	0.305	0.368	1	IVNS1ABP	0.957069
ZKSCAN1	0.110399	0.150464	0.337	0.228	1	ZKSCAN1	0.957034
CDC16	0.110468	0.129835	0.137	0.07	1	CDC16	0.956762
EPS8L2	0.110468	0.129275	0.137	0.07	1	EPS8L2	0.956762
APLP2	0.110857	0.106105	0.242	0.149	1	APLP2	0.955238
CPLANE1	0.110997	0.144902	0.126	0.061	1	CPLANE1	0.954691
ZDHHC5	0.111313	0.15037	0.168	0.096	1	ZDHHC5	0.953455
RPL36AL	0.111394	-0.115015	0.947	0.947	1	RPL36AL	0.953137
SIL1	0.111455	0.127129	0.137	0.07	1	SIL1	0.952902
TMEM131	0.111488	0.186537	0.158	0.088	1	TMEM131	0.952774
PLEKHA1	0.111814	-0.182563	0.253	0.342	1	PLEKHA1	0.951505
CLK1	0.11187	-0.189731	0.232	0.325	1	CLK1	0.951285
SETDB2	0.11195	-0.146249	0.063	0.132	1	SETDB2	0.950974
IL16	0.112001	0.0441911	0.642	0.456	1	IL16	0.950777
DGCR2	0.112032	0.0871006	0.126	0.061	1	DGCR2	0.950656
THOC2	0.112041	0.104229	0.379	0.254	1	THOC2	0.950622
YLPM1	0.112516	-0.206537	0.116	0.193	1	YLPM1	0.948787
ARL17A	0.112523	0.0731367	0.116	0.053	1	ARL17A	0.94876
LARP4B	0.112947	-0.078483	0.063	0.132	1	LARP4B	0.947124
GPBP1L1	0.113021	0.135496	0.337	0.228	1	GPBP1L1	0.946841
TP53I13	0.11315	0.157765	0.337	0.219	1	TP53I13	0.946347
CCDC93	0.113238	-0.106276	0.053	0.114	1	CCDC93	0.946009
RUNX3	0.113597	0.0747554	0.611	0.447	1	RUNX3	0.944635
STN1	0.114177	0.0977531	0.295	0.193	1	STN1	0.942422
FASLG	0.114257	0.194043	0.484	0.351	1	FASLG	0.942118
RGS3	0.114291	-0.156771	0.074	0.14	1	RGS3	0.94199
ANKRD28	0.114316	-0.133137	0.053	0.114	1	ANKRD28	0.941892
TUFM	0.11434	0.11592	0.568	0.43	1	TUFM	0.941804
ISCU	0.114997	0.0846423	0.589	0.43	1	ISCU	0.939315
IMP4	0.115188	0.141649	0.189	0.114	1	IMP4	0.938594
TTC14	0.115677	-0.230525	0.442	0.491	1	TTC14	0.936754
MED19	0.115832	-0.161416	0.116	0.193	1	MED19	0.93617
TMEM208	0.115972	0.0790789	0.411	0.289	1	TMEM208	0.935646
GAK	0.116198	-0.157649	0.147	0.228	1	GAK	0.9348
AC245060.5	0.116253	0.0862543	0.126	0.061	1	AC245060.5	0.934598
ZNF780B	0.116253	0.0841637	0.126	0.061	1	ZNF780B	0.934598
GALM	0.116491	0.0682188	0.137	0.07	1	GALM	0.933707
PCMT1	0.116713	0.152321	0.389	0.272	1	PCMT1	0.932881
FGD5-AS1	0.116836	0.140665	0.211	0.132	1	FGD5-AS1	0.932422
ADNP	0.116888	-0.241378	0.168	0.246	1	ADNP	0.932231
LINC01684	0.116981	0.0227143	0.116	0.053	1	LINC01684	0.931885
MCMBP	0.117094	0.138807	0.158	0.088	1	MCMBP	0.931465
CCNI	0.11723	0.132696	0.8	0.719	1	CCNI	0.930963
R3HDM1	0.117454	0.1465	0.242	0.158	1	R3HDM1	0.930132
ATP1B1	0.117519	0.117837	0.137	0.07	1	ATP1B1	0.92989
VBP1	0.117692	0.116693	0.358	0.246	1	VBP1	0.929254
AC016831.7	0.117694	-0.131921	0.084	0.158	1	AC016831.7	0.929245
SIKE1	0.117761	0.0906209	0.242	0.149	1	SIKE1	0.928998
ZNF253	0.11805	0.127129	0.158	0.088	1	ZNF253	0.927936
EDF1	0.118163	-0.120912	0.853	0.807	1	EDF1	0.927518
NOSIP	0.118204	0.106724	0.337	0.237	1	NOSIP	0.927368
GPALPP1	0.118397	-0.196884	0.105	0.175	1	GPALPP1	0.926659
ASH1L	0.118524	0.173355	0.453	0.342	1	ASH1L	0.926193
RFXANK	0.118657	0.11755	0.189	0.114	1	RFXANK	0.925707
GSTK1	0.118778	0.0896876	0.653	0.474	1	GSTK1	0.925263
TCAIM	0.118887	-0.141752	0.063	0.123	1	TCAIM	0.924866
FAM50A	0.119149	0.140664	0.4	0.298	1	FAM50A	0.923911
ATP6AP1	0.119191	0.142898	0.232	0.149	1	ATP6AP1	0.923756
TXNDC15	0.119225	0.139076	0.2	0.123	1	TXNDC15	0.923633
SSBP1	0.119258	-0.150013	0.642	0.649	1	SSBP1	0.923512
MAPK14	0.119272	-0.177297	0.095	0.167	1	MAPK14	0.923461
WDR41	0.119598	0.102168	0.137	0.07	1	WDR41	0.922277
MED12	0.119831	-0.113963	0.053	0.114	1	MED12	0.92143
ANKRD36	0.120184	0.0864628	0.189	0.105	1	ANKRD36	0.920154
SEC23IP	0.120647	0.0994993	0.137	0.07	1	SEC23IP	0.918482
MECP2	0.120837	-0.120682	0.263	0.368	1	MECP2	0.9178
MYO1G	0.12102	-0.199524	0.274	0.351	1	MYO1G	0.917143
PPM1B	0.121085	0.193917	0.179	0.114	1	PPM1B	0.91691
BCL7B	0.121175	0.0908615	0.179	0.105	1	BCL7B	0.916588
PCGF5	0.121398	-0.190855	0.137	0.219	1	PCGF5	0.915787
PHF12	0.121409	0.0784507	0.2	0.114	1	PHF12	0.91575
THAP11	0.12152	0.0831859	0.221	0.132	1	THAP11	0.915351
MRPS28	0.121702	0.0705738	0.126	0.061	1	MRPS28	0.914702
MRPS27	0.121746	0.0935204	0.147	0.079	1	MRPS27	0.914546
RGP1	0.121992	-0.163338	0.105	0.175	1	RGP1	0.91367
ACTG1	0.122127	0.12565	0.989	0.974	1	ACTG1	0.913188
EIF3M	0.12217	0.0387791	0.6	0.404	1	EIF3M	0.913036
SNAP29	0.122338	0.0987412	0.221	0.14	1	SNAP29	0.912439
C1orf131	0.122549	-0.186286	0.147	0.228	1	C1orf131	0.911692
CDK5	0.122768	0.0984752	0.147	0.079	1	CDK5	0.910916
GOLGA8B	0.122842	-0.250318	0.189	0.254	1	GOLGA8B	0.910653
CDK10	0.122903	-0.154268	0.105	0.175	1	CDK10	0.910436
USP15	0.122977	0.154248	0.463	0.377	1	USP15	0.910176
PDS5B	0.123009	0.0942172	0.295	0.202	1	PDS5B	0.910062
TNFRSF25	0.123108	0.112008	0.189	0.114	1	TNFRSF25	0.909715
HEBP2	0.123131	0.110106	0.421	0.307	1	HEBP2	0.909631
ZNF677	0.123135	-0.164463	0.116	0.193	1	ZNF677	0.90962
NPC1	0.123205	-0.210097	0.063	0.123	1	NPC1	0.909372
TRG-AS1	0.123279	0.100281	0.442	0.316	1	TRG-AS1	0.909111
CBWD1	0.123912	0.0950041	0.158	0.088	1	CBWD1	0.906887
MTURN	0.123942	-0.156815	0.095	0.167	1	MTURN	0.906781
ECHS1	0.124024	-0.156194	0.326	0.421	1	ECHS1	0.906495
RPL37	0.12408	0.0573441	0.989	0.965	1	RPL37	0.906299
GSTO1	0.124205	0.122932	0.526	0.439	1	GSTO1	0.905861
GNAQ	0.124259	0.113885	0.168	0.096	1	GNAQ	0.905672
RBBP7	0.124572	0.114654	0.316	0.211	1	RBBP7	0.90458
ARFIP1	0.124889	0.13361	0.179	0.105	1	ARFIP1	0.903477
TEFM	0.124889	0.111204	0.179	0.105	1	TEFM	0.903477
BECN1	0.124889	0.110585	0.179	0.105	1	BECN1	0.903477
GK5	0.124893	-0.142624	0.095	0.167	1	GK5	0.903462
MTHFD2	0.124911	0.122328	0.158	0.088	1	MTHFD2	0.9034
KLHDC4	0.124924	0.138577	0.189	0.114	1	KLHDC4	0.903354
SERF2	0.124927	0.0803499	1	0.974	1	SERF2	0.903345
RPAP2	0.125225	-0.166708	0.211	0.307	1	RPAP2	0.902308
FUBP3	0.125552	-0.0931902	0.053	0.114	1	FUBP3	0.901175
PCNX2	0.125671	-0.168581	0.105	0.175	1	PCNX2	0.900766
CALHM2	0.125874	0.0666099	0.147	0.079	1	CALHM2	0.900063
JADE1	0.126569	0.0854373	0.221	0.14	1	JADE1	0.897672
YARS	0.126693	0.115983	0.316	0.219	1	YARS	0.897247
ATP5MF	0.126745	0.147544	0.558	0.456	1	ATP5MF	0.897069
EML3	0.127099	0.0627121	0.137	0.07	1	EML3	0.895859
SLC35E1	0.127429	0.115166	0.221	0.14	1	SLC35E1	0.894732
SNX18	0.127487	0.129268	0.242	0.149	1	SNX18	0.894535
TIA1	0.127732	0.155367	0.179	0.105	1	TIA1	0.8937
CHAMP1	0.127945	0.102621	0.158	0.088	1	CHAMP1	0.892977
RAB28	0.127979	0.0742952	0.147	0.079	1	RAB28	0.89286
DCTN6	0.128037	0.116086	0.253	0.167	1	DCTN6	0.892666
UNC13D	0.12826	0.155324	0.232	0.149	1	UNC13D	0.891907
NR1H2	0.128328	-0.233934	0.211	0.289	1	NR1H2	0.891678
LSM1	0.128329	0.17254	0.4	0.307	1	LSM1	0.891674
EMC2	0.128536	0.0485183	0.232	0.14	1	EMC2	0.890974
ADK	0.12862	0.16971	0.189	0.114	1	ADK	0.890693
PIGBOS1	0.12862	-0.109992	0.105	0.184	1	PIGBOS1	0.890693
CORO1A	0.128633	0.104449	0.968	0.965	1	CORO1A	0.890647
RPL30	0.12864	-0.0751618	1	1	1	RPL30	0.890623
NCF1	0.128748	0.12967	0.411	0.289	1	NCF1	0.89026
SNRNP200	0.128798	0.153255	0.389	0.281	1	SNRNP200	0.89009
ANP32A	0.128894	0.0782166	0.589	0.43	1	ANP32A	0.889768
VMP1	0.129058	0.16904	0.537	0.439	1	VMP1	0.889213
RBM22	0.129095	-0.137089	0.168	0.254	1	RBM22	0.889091
POLR2G	0.129237	0.160313	0.411	0.307	1	POLR2G	0.888612
LAMP1	0.129491	-0.248558	0.295	0.36	1	LAMP1	0.887759
UTP6	0.129557	0.128161	0.189	0.114	1	UTP6	0.88754
ARHGEF9	0.129557	0.109794	0.189	0.114	1	ARHGEF9	0.88754
ADH5	0.130013	-0.19895	0.347	0.43	1	ADH5	0.886013
LATS1	0.130391	-0.186937	0.105	0.175	1	LATS1	0.884753
ZFR	0.130419	0.14172	0.326	0.228	1	ZFR	0.884659
NEK7	0.130649	-0.117208	0.074	0.14	1	NEK7	0.883895
RLF	0.130649	-0.151206	0.074	0.14	1	RLF	0.883895
ADI1	0.130914	-0.216154	0.137	0.211	1	ADI1	0.883015
HLA-E	0.130965	-0.0971032	0.968	0.982	1	HLA-E	0.882845
COPS6	0.131022	0.0724508	0.558	0.412	1	COPS6	0.882657
GIMAP6	0.13104	0.0661557	0.568	0.43	1	GIMAP6	0.882595
SPRTN	0.131517	0.131372	0.211	0.132	1	SPRTN	0.881019
PDE6D	0.131546	0.0591455	0.137	0.07	1	PDE6D	0.880921
PSMB4	0.131657	0.215082	0.432	0.342	1	PSMB4	0.880556
REXO1	0.131728	-0.12105	0.074	0.14	1	REXO1	0.88032
RFC5	0.132207	-0.135704	0.063	0.123	1	RFC5	0.878745
TTI2	0.132207	-0.16641	0.063	0.123	1	TTI2	0.878745
PCMTD2	0.132207	-0.262758	0.063	0.123	1	PCMTD2	0.878745
PIP4K2A	0.132404	0.0871663	0.484	0.351	1	PIP4K2A	0.8781
DDX5	0.132431	-0.126805	0.968	0.965	1	DDX5	0.878009
KAT6B	0.132516	-0.124421	0.221	0.307	1	KAT6B	0.87773
TBK1	0.132516	-0.261937	0.232	0.298	1	TBK1	0.87773
PYROXD1	0.132582	0.120089	0.179	0.105	1	PYROXD1	0.877514
RAD1	0.132603	-0.156672	0.084	0.149	1	RAD1	0.877447
PGS1	0.132677	0.0604116	0.137	0.07	1	PGS1	0.877204
KMT2B	0.132707	0.121128	0.263	0.167	1	KMT2B	0.877106
TIFA	0.132815	-0.180318	0.074	0.14	1	TIFA	0.876752
PIN4	0.132832	0.112907	0.305	0.219	1	PIN4	0.876697
RAN	0.133167	0.119345	0.874	0.711	1	RAN	0.875602
ARID1B	0.133251	-0.156974	0.442	0.509	1	ARID1B	0.875331
MED6	0.133306	0.110161	0.305	0.211	1	MED6	0.875152
GFER	0.133358	0.145024	0.189	0.114	1	GFER	0.874981
SH3KBP1	0.133363	0.133634	0.463	0.325	1	SH3KBP1	0.874965
ANKRD10	0.133442	-0.143845	0.147	0.228	1	ANKRD10	0.874708
ZSCAN16-AS1	0.133581	-0.126395	0.116	0.193	1	ZSCAN16-AS1	0.874254
ARHGAP18	0.134136	0.117413	0.284	0.184	1	ARHGAP18	0.872455
RABAC1	0.134341	0.122721	0.8	0.675	1	RABAC1	0.87179
PRKAR2A	0.134472	0.104461	0.221	0.14	1	PRKAR2A	0.871369
TXN2	0.135039	0.157203	0.347	0.246	1	TXN2	0.869542
GSK3B	0.135247	0.0837427	0.158	0.088	1	GSK3B	0.868872
RNF146	0.13556	0.122217	0.179	0.105	1	RNF146	0.867867
PGM1	0.135711	-0.157682	0.063	0.123	1	PGM1	0.867384
ACADM	0.135786	-0.1121	0.158	0.237	1	ACADM	0.867146
FNTA	0.135787	0.10404	0.347	0.246	1	FNTA	0.867141
N4BP2	0.136416	0.149188	0.2	0.123	1	N4BP2	0.865134
CD52	0.13676	-0.160368	0.863	0.868	1	CD52	0.864042
GNAI2	0.136912	-0.161116	0.779	0.798	1	GNAI2	0.863558
BRF2	0.136938	0.156275	0.105	0.053	1	BRF2	0.863476
MDC1	0.136938	0.115773	0.105	0.053	1	MDC1	0.863476
ZNF644	0.137417	0.0866895	0.368	0.263	1	ZNF644	0.861959
PHPT1	0.137578	0.196732	0.547	0.439	1	PHPT1	0.86145
PHF3	0.137796	0.116175	0.547	0.421	1	PHF3	0.860763
CHCHD1	0.13814	0.138655	0.442	0.351	1	CHCHD1	0.85968
TRA2B	0.13814	-0.18817	0.358	0.421	1	TRA2B	0.85968
CLCN3	0.138332	0.108715	0.2	0.123	1	CLCN3	0.859078
DGKD	0.138439	-0.220931	0.126	0.193	1	DGKD	0.858742
SYPL1	0.138505	0.117367	0.305	0.202	1	SYPL1	0.858533
COMMD8	0.138515	0.101595	0.337	0.237	1	COMMD8	0.858504
LINC00996	0.138878	-0.318152	0.242	0.307	1	LINC00996	0.857367
GMNN	0.138886	0.192008	0.116	0.061	1	GMNN	0.85734
EZH2	0.138886	0.152407	0.116	0.061	1	EZH2	0.85734
POU2F2	0.138902	-0.194881	0.126	0.202	1	POU2F2	0.857292
KLHDC3	0.139024	0.130593	0.221	0.14	1	KLHDC3	0.85691
GMEB1	0.139221	0.0789026	0.189	0.114	1	GMEB1	0.856296
TOX4	0.13928	0.0630744	0.368	0.263	1	TOX4	0.856113
RAB14	0.139499	0.115026	0.379	0.289	1	RAB14	0.855429
APAF1	0.139588	0.163361	0.105	0.053	1	APAF1	0.855151
SETD1A	0.139588	0.109198	0.105	0.053	1	SETD1A	0.855151
B3GAT3	0.139656	0.106975	0.337	0.228	1	B3GAT3	0.854939
LSM14B	0.140077	-0.180925	0.053	0.105	1	LSM14B	0.853634
HNRNPUL1	0.140156	0.156034	0.295	0.202	1	HNRNPUL1	0.853387
FAM177A1	0.140207	0.129269	0.379	0.272	1	FAM177A1	0.853232
OCEL1	0.140242	-0.133414	0.105	0.175	1	OCEL1	0.853121
C12orf10	0.140378	0.105092	0.326	0.228	1	C12orf10	0.8527
OGFOD3	0.140495	-0.120891	0.063	0.123	1	OGFOD3	0.852339
IKZF2	0.140568	0.147048	0.232	0.149	1	IKZF2	0.852112
SERINC1	0.140773	-0.27205	0.232	0.307	1	SERINC1	0.851482
C15orf40	0.141712	0.0333885	0.326	0.211	1	C15orf40	0.848592
GRPEL1	0.141759	0.0471788	0.158	0.088	1	GRPEL1	0.84845
RPSA	0.141841	0.0836857	0.968	0.974	1	RPSA	0.848197
EIF1	0.141846	0.0806198	0.979	1	1	EIF1	0.848183
HOOK3	0.142088	-0.121031	0.168	0.246	1	HOOK3	0.847442
MTHFD1	0.142278	0.0995062	0.105	0.053	1	MTHFD1	0.846863
POC1B-AS1	0.142278	0.0963216	0.105	0.053	1	POC1B-AS1	0.846863
DRAM2	0.142279	-0.170069	0.105	0.175	1	DRAM2	0.846858
RBM6	0.142288	-0.238714	0.337	0.395	1	RBM6	0.846832
CEP250	0.142334	0.0753219	0.147	0.079	1	CEP250	0.846691
BIN2	0.142378	-0.216611	0.579	0.596	1	BIN2	0.846556
ELAVL1	0.142663	-0.178218	0.221	0.307	1	ELAVL1	0.845689
RPL32	0.143096	0.0677569	1	1	1	RPL32	0.844371
MAML1	0.143133	-0.183546	0.095	0.158	1	MAML1	0.844262
EFR3A	0.143134	0.163801	0.305	0.219	1	EFR3A	0.844258
UPF3A	0.143198	-0.144171	0.242	0.316	1	UPF3A	0.844063
CFAP298	0.143296	0.1133	0.305	0.211	1	CFAP298	0.843766
STUB1	0.143573	-0.216895	0.453	0.491	1	STUB1	0.842927
ARPC5L	0.143854	0.167544	0.695	0.544	1	ARPC5L	0.842079
PABPC1	0.143954	0.101291	0.811	0.711	1	PABPC1	0.841778
STARD10	0.144067	-0.0968937	0.074	0.14	1	STARD10	0.841435
C17orf67	0.144167	-0.111903	0.063	0.123	1	C17orf67	0.841135
ZNF274	0.144256	0.0943747	0.189	0.114	1	ZNF274	0.840865
ATP6V0E1	0.14456	0.146476	0.8	0.772	1	ATP6V0E1	0.839953
CASK	0.144599	-0.193086	0.274	0.342	1	CASK	0.839836
HOXB4	0.144754	0.0676969	0.168	0.096	1	HOXB4	0.839368
DAZAP1	0.14507	0.0702315	0.305	0.202	1	DAZAP1	0.838424
ACTR2	0.145154	0.125346	0.632	0.509	1	ACTR2	0.83817
BCCIP	0.145296	0.171384	0.158	0.096	1	BCCIP	0.837747
CCDC69	0.145454	-0.245028	0.284	0.342	1	CCDC69	0.837273
RPS11	0.145623	0.111535	1	0.991	1	RPS11	0.836771
CDC37L1	0.145816	0.0642106	0.147	0.079	1	CDC37L1	0.836194
GTPBP4	0.145902	0.130706	0.316	0.228	1	GTPBP4	0.835938
UQCC2	0.145981	0.120115	0.295	0.202	1	UQCC2	0.835703
PYHIN1	0.146086	-0.157464	0.495	0.535	1	PYHIN1	0.835392
CD9	0.146612	0.245829	0.295	0.219	1	CD9	0.833831
MARS	0.146655	0.154104	0.126	0.07	1	MARS	0.833702
UBE4B	0.146655	0.153673	0.126	0.07	1	UBE4B	0.833702
PIGS	0.146939	0.097419	0.168	0.096	1	PIGS	0.832864
ZMAT2	0.147116	0.15227	0.442	0.325	1	ZMAT2	0.832342
KBTBD2	0.147367	0.051619	0.158	0.088	1	KBTBD2	0.8316
ERP29	0.147368	0.140708	0.674	0.579	1	ERP29	0.831596
CXCR4	0.147915	-0.193942	0.589	0.64	1	CXCR4	0.829989
DDX10	0.147947	-0.160643	0.074	0.132	1	DDX10	0.829895
BANP	0.148068	0.0383418	0.137	0.07	1	BANP	0.829539
TBC1D22A	0.14811	-0.164773	0.116	0.184	1	TBC1D22A	0.829416
CTSB	0.148162	0.152663	0.147	0.088	1	CTSB	0.829264
OXLD1	0.148256	0.126038	0.305	0.228	1	OXLD1	0.828988
PSMC4	0.148323	0.105349	0.474	0.36	1	PSMC4	0.828792
EXOSC9	0.148337	0.141602	0.211	0.14	1	EXOSC9	0.828749
CCL4	0.148353	0.461226	0.568	0.421	1	CCL4	0.828702
EEF1B2	0.148799	0.0999476	0.968	0.93	1	EEF1B2	0.827401
NGLY1	0.149002	0.16333	0.284	0.202	1	NGLY1	0.826807
IMPDH1	0.149033	0.125485	0.242	0.158	1	IMPDH1	0.826718
GLMN	0.149082	-0.141678	0.084	0.149	1	GLMN	0.826574
NDUFS3	0.149176	0.138119	0.358	0.263	1	NDUFS3	0.826302
LACTB2	0.149176	0.0871747	0.105	0.053	1	LACTB2	0.826301
ZBED4	0.149419	-0.151698	0.053	0.105	1	ZBED4	0.825593
SIN3A	0.14943	0.0780756	0.189	0.114	1	SIN3A	0.825562
UBQLN2	0.149431	-0.0857521	0.105	0.184	1	UBQLN2	0.825561
PNISR	0.149523	-0.149439	0.853	0.86	1	PNISR	0.825293
ABHD17B	0.149589	-0.147006	0.105	0.175	1	ABHD17B	0.8251
RAMMET	0.149693	0.142142	0.421	0.333	1	RAMMET	0.824798
DYNC1H1	0.149728	0.056762	0.474	0.342	1	DYNC1H1	0.824698
KHDC4	0.149813	0.0287224	0.221	0.132	1	KHDC4	0.824449
SOS2	0.149902	-0.174621	0.147	0.219	1	SOS2	0.824192
FAM217B	0.149969	-0.18051	0.158	0.228	1	FAM217B	0.824
ATM	0.150029	-0.147205	0.6	0.675	1	ATM	0.823826
RAB6A	0.150079	0.102337	0.274	0.184	1	RAB6A	0.823679
SRSF4	0.1502	0.0429611	0.505	0.36	1	SRSF4	0.82333
KIF1BP	0.150586	0.121007	0.105	0.053	1	KIF1BP	0.822216
AHDC1	0.150586	0.0989343	0.105	0.053	1	AHDC1	0.822216
RAB1B	0.150687	-0.171326	0.2	0.281	1	RAB1B	0.821925
GGNBP2	0.150711	0.146088	0.421	0.316	1	GGNBP2	0.821854
PBX3	0.150792	-0.159529	0.053	0.105	1	PBX3	0.821622
ACAA1	0.150867	0.183686	0.358	0.272	1	ACAA1	0.821406
BAD	0.150909	0.0854919	0.242	0.158	1	BAD	0.821286
SPTLC2	0.151218	-0.151506	0.116	0.184	1	SPTLC2	0.820396
ABCB1	0.151324	-0.238933	0.242	0.307	1	ABCB1	0.820092
PHC2	0.151729	-0.150032	0.105	0.175	1	PHC2	0.81893
RSL1D1	0.151782	0.106048	0.463	0.36	1	RSL1D1	0.818781
MBNL1	0.151824	-0.229365	0.674	0.693	1	MBNL1	0.818659
MMS22L	0.151931	0.155845	0.116	0.061	1	MMS22L	0.818353
SCAMP1	0.152006	0.119067	0.105	0.053	1	SCAMP1	0.81814
SRM	0.152397	0.141536	0.411	0.307	1	SRM	0.817022
MARK3	0.152426	0.175375	0.284	0.211	1	MARK3	0.81694
CD47	0.152539	-0.19675	0.516	0.509	1	CD47	0.81662
LINC00685	0.152602	0.101832	0.232	0.158	1	LINC00685	0.81644
MRPS12	0.152814	0.0743247	0.463	0.342	1	MRPS12	0.815837
PIK3AP1	0.15284	0.158796	0.137	0.079	1	PIK3AP1	0.815764
MRFAP1L1	0.152915	0.0684809	0.253	0.158	1	MRFAP1L1	0.815551
CBFB	0.153204	0.0744572	0.158	0.096	1	CBFB	0.81473
GNB1	0.153228	0.0756088	0.389	0.281	1	GNB1	0.814661
SUCLG1	0.153344	0.137567	0.326	0.246	1	SUCLG1	0.814334
PAF1	0.153436	0.0863011	0.105	0.053	1	PAF1	0.814074
ABHD5	0.153436	0.0816449	0.105	0.053	1	ABHD5	0.814074
PA2G4	0.153445	0.120209	0.6	0.509	1	PA2G4	0.814047
LIMD1	0.153566	-0.138428	0.053	0.105	1	LIMD1	0.813705
USP14	0.153607	0.126842	0.295	0.211	1	USP14	0.813589
ZNF428	0.153798	0.0929313	0.474	0.342	1	ZNF428	0.813049
UTP14A	0.154068	0.130312	0.147	0.088	1	UTP14A	0.812288
PRKRIP1	0.154082	-0.155092	0.074	0.132	1	PRKRIP1	0.812248
PTPRE	0.15426	-0.229837	0.2	0.272	1	PTPRE	0.811745
ARMC8	0.154613	0.094223	0.263	0.175	1	ARMC8	0.810753
ZNF397	0.154813	-0.229766	0.137	0.202	1	ZNF397	0.810192
PCGF6	0.154876	0.0735822	0.105	0.053	1	PCGF6	0.810016
SEC22B	0.154958	-0.211738	0.305	0.368	1	SEC22B	0.809785
PIK3R1	0.155196	0.146369	0.589	0.474	1	PIK3R1	0.809119
SP100	0.155257	-0.178066	0.537	0.596	1	SP100	0.808949
ASXL2	0.155321	0.18919	0.263	0.184	1	ASXL2	0.808769
CPSF7	0.155332	-0.149362	0.074	0.132	1	CPSF7	0.808739
DUSP10	0.155332	-0.220063	0.074	0.132	1	DUSP10	0.808739
UPF3B	0.15544	-0.161193	0.116	0.184	1	UPF3B	0.808439
OTUD6B-AS1	0.155613	-0.244361	0.295	0.36	1	OTUD6B-AS1	0.807953
AKR1B1	0.155677	0.0858091	0.242	0.158	1	AKR1B1	0.807776
MX1	0.155825	0.0907588	0.189	0.114	1	MX1	0.807363
ARL6IP5	0.156063	-0.125147	0.842	0.789	1	ARL6IP5	0.806699
HSPB11	0.156141	0.10913	0.411	0.298	1	HSPB11	0.806483
AC005838.2	0.156326	0.12087	0.105	0.053	1	AC005838.2	0.805968
KMT5B	0.156493	-0.232308	0.2	0.272	1	KMT5B	0.805506
STAMBP	0.156504	-0.152849	0.095	0.158	1	STAMBP	0.805475
CRTC3	0.156642	0.155375	0.305	0.219	1	CRTC3	0.805093
KIAA0040	0.156692	0.185593	0.158	0.096	1	KIAA0040	0.804954
TNFRSF18	0.156717	0.137098	0.716	0.535	1	TNFRSF18	0.804885
GOLGA3	0.156911	0.051809	0.189	0.114	1	GOLGA3	0.804348
COX14	0.156977	0.0719693	0.505	0.386	1	COX14	0.804164
MTO1	0.157087	0.149574	0.147	0.088	1	MTO1	0.80386
IGFLR1	0.15731	-0.198062	0.105	0.167	1	IGFLR1	0.803244
UPF2	0.157393	-0.20397	0.2	0.272	1	UPF2	0.803016
NEK1	0.157403	0.13938	0.116	0.061	1	NEK1	0.802987
FOPNL	0.157403	0.0680243	0.116	0.061	1	FOPNL	0.802987
DDT	0.157708	0.12755	0.621	0.456	1	DDT	0.802147
ARFGAP2	0.157751	0.0655898	0.368	0.263	1	ARFGAP2	0.802027
NSD2	0.157787	0.112744	0.105	0.053	1	NSD2	0.801928
CAAP1	0.157872	0.0314559	0.179	0.105	1	CAAP1	0.801696
LPCAT1	0.157874	0.171265	0.211	0.14	1	LPCAT1	0.801691
NSFL1C	0.158002	0.0739642	0.189	0.114	1	NSFL1C	0.801337
GSTP1	0.158091	0.108628	0.874	0.763	1	GSTP1	0.801093
UBL5	0.158306	0.115264	0.779	0.649	1	UBL5	0.800504
TBX21	0.158664	-0.197576	0.116	0.184	1	TBX21	0.799522
CNPY2	0.158972	0.143942	0.484	0.368	1	CNPY2	0.798679
QRICH1	0.159128	-0.151302	0.074	0.132	1	QRICH1	0.798253
TUT4	0.159152	-0.224343	0.316	0.395	1	TUT4	0.798187
GLT8D1	0.1592	0.157707	0.221	0.158	1	GLT8D1	0.798057
PHYH	0.159258	0.0751015	0.105	0.053	1	PHYH	0.797898
SDCCAG8	0.159405	0.0924944	0.168	0.096	1	SDCCAG8	0.797497
PTEN	0.159537	-0.162881	0.2	0.281	1	PTEN	0.797138
DEXI	0.159556	0.159815	0.2	0.132	1	DEXI	0.797086
PLEKHM2	0.159593	0.12202	0.126	0.07	1	PLEKHM2	0.796986
PTPRA	0.159766	0.0960103	0.358	0.263	1	PTPRA	0.796516
NDUFV2	0.159829	0.106499	0.632	0.474	1	NDUFV2	0.796344
EIF4EBP1	0.15999	0.13837	0.295	0.202	1	EIF4EBP1	0.795908
UBE2D3	0.160063	-0.142866	0.642	0.684	1	UBE2D3	0.795708
MCM6	0.160194	0.108818	0.116	0.061	1	MCM6	0.795353
MBOAT7	0.160194	0.101132	0.116	0.061	1	MBOAT7	0.795353
OSBPL2	0.160194	0.0829227	0.116	0.061	1	OSBPL2	0.795353
EID2	0.160409	0.109892	0.137	0.079	1	EID2	0.794772
XPO1	0.160641	0.0892261	0.284	0.193	1	XPO1	0.794145
SYNGR2	0.160703	0.0704982	0.179	0.105	1	SYNGR2	0.793977
BCL2L13	0.16074	0.0899289	0.105	0.053	1	BCL2L13	0.793877
ELOF1	0.160896	0.147821	0.221	0.149	1	ELOF1	0.793454
PMEPA1	0.160989	-0.313386	0.137	0.211	1	PMEPA1	0.793204
BCL2	0.161111	-0.218315	0.189	0.263	1	BCL2	0.792875
TMEM106B	0.161178	-0.239551	0.221	0.307	1	TMEM106B	0.792694
CEP350	0.16157	-0.225185	0.305	0.377	1	CEP350	0.791638
SDCBP	0.1616	0.171778	0.421	0.342	1	SDCBP	0.79156
CARD16	0.1616	0.129906	0.442	0.325	1	CARD16	0.79156
FAM215B	0.161688	-0.155047	0.126	0.193	1	FAM215B	0.791322
UMPS	0.161755	0.0572344	0.168	0.096	1	UMPS	0.791141
SLC12A6	0.161846	-0.176093	0.105	0.167	1	SLC12A6	0.790897
CCM2	0.162022	-0.226994	0.389	0.447	1	CCM2	0.790425
SMARCC1	0.162032	-0.154374	0.221	0.298	1	SMARCC1	0.790399
CEBPD	0.162111	-0.455361	0.389	0.456	1	CEBPD	0.790189
PSIP1	0.162135	0.160204	0.568	0.456	1	PSIP1	0.790123
POU5F2	0.162232	0.0612718	0.105	0.053	1	POU5F2	0.789865
PTPRN2	0.162281	0.153498	0.126	0.07	1	PTPRN2	0.789732
SAT1	0.162629	-0.250546	0.263	0.333	1	SAT1	0.788802
PPCDC	0.162635	0.0794289	0.147	0.088	1	PPCDC	0.788785
ATP5MD	0.162936	0.0993645	0.642	0.518	1	ATP5MD	0.787983
DDX52	0.162978	-0.145357	0.126	0.202	1	DDX52	0.787871
POLD2	0.162994	0.105987	0.137	0.079	1	POLD2	0.787829
COX8A	0.163171	-0.129692	0.663	0.693	1	COX8A	0.787357
STX10	0.163453	-0.170081	0.189	0.263	1	STX10	0.786608
PTRHD1	0.163487	0.180335	0.242	0.175	1	PTRHD1	0.786517
PFDN1	0.164082	-0.219665	0.179	0.246	1	PFDN1	0.784939
LLGL2	0.16415	-0.154299	0.116	0.184	1	LLGL2	0.78476
TMEM9B	0.164221	0.100756	0.358	0.246	1	TMEM9B	0.784571
CENPH	0.164451	0.100053	0.116	0.061	1	CENPH	0.783963
ID2	0.164682	0.155325	0.821	0.719	1	ID2	0.783353
SRSF1	0.164905	-0.171177	0.242	0.316	1	SRSF1	0.782765
ACSL3	0.165063	0.0833529	0.179	0.114	1	ACSL3	0.78235
CALM2	0.165158	-0.128263	0.779	0.781	1	CALM2	0.7821
NME6	0.165247	0.0765707	0.105	0.053	1	NME6	0.781867
CLN3	0.165247	0.0556438	0.105	0.053	1	CLN3	0.781867
GBP3	0.165555	-0.203246	0.158	0.228	1	GBP3	0.781058
MYO9B	0.165596	-0.142893	0.242	0.325	1	MYO9B	0.780949
AGO1	0.16561	0.133109	0.137	0.079	1	AGO1	0.780913
TWF1	0.16561	0.112718	0.137	0.079	1	TWF1	0.780913
MAP3K5	0.165889	0.120903	0.116	0.061	1	MAP3K5	0.780183
PECAM1	0.165889	0.0626752	0.116	0.061	1	PECAM1	0.780183
AURKAIP1	0.166331	-0.133657	0.526	0.605	1	AURKAIP1	0.779027
MRPS11	0.166388	0.0881832	0.358	0.246	1	MRPS11	0.778877
TKT	0.166703	0.0456094	0.474	0.333	1	TKT	0.778055
CORO1B	0.166738	0.0972962	0.221	0.14	1	CORO1B	0.777966
VIPAS39	0.16677	0.0881341	0.105	0.053	1	VIPAS39	0.777882
CLTB	0.16683	-0.195621	0.284	0.36	1	CLTB	0.777726
TADA3	0.167269	0.0856161	0.463	0.333	1	TADA3	0.776585
GTF2H5	0.167364	0.0573533	0.4	0.281	1	GTF2H5	0.776339
PPIP5K2	0.167364	-0.24142	0.211	0.272	1	PPIP5K2	0.776337
AASDHPPT	0.167649	0.0976252	0.263	0.184	1	AASDHPPT	0.775598
PRKAG2	0.167707	0.0262172	0.158	0.088	1	PRKAG2	0.775448
ATP5F1E	0.167759	0.0953566	0.968	0.939	1	ATP5F1E	0.775315
RPL35A	0.167781	-0.0648495	1	0.991	1	RPL35A	0.775256
ANXA5	0.167888	0.146721	0.316	0.228	1	ANXA5	0.77498
ILK	0.167985	0.159697	0.4	0.316	1	ILK	0.77473
PPME1	0.168021	-0.108228	0.053	0.105	1	PPME1	0.774638
RABL2B	0.168258	0.08227	0.137	0.079	1	RABL2B	0.774025
LINC00667	0.168304	0.128704	0.295	0.202	1	LINC00667	0.773906
POLR2L	0.168633	0.114465	0.663	0.509	1	POLR2L	0.773056
CAPN15	0.168971	0.112046	0.147	0.088	1	CAPN15	0.772187
C9orf78	0.16899	0.113464	0.579	0.465	1	C9orf78	0.772139
EIF2S3	0.169108	0.0351232	0.463	0.342	1	EIF2S3	0.771836
TXNDC11	0.169151	0.133528	0.126	0.07	1	TXNDC11	0.771726
ZNF675	0.169151	-0.0472575	0.063	0.123	1	ZNF675	0.771726
PDIA6	0.169368	0.143634	0.589	0.456	1	PDIA6	0.771168
SNTB2	0.169487	0.112416	0.211	0.14	1	SNTB2	0.770864
EP400	0.16961	0.100228	0.2	0.123	1	EP400	0.770549
DNAAF2	0.169848	0.0773975	0.105	0.053	1	DNAAF2	0.76994
EFL1	0.169848	0.0740097	0.105	0.053	1	EFL1	0.76994
CYTIP	0.16988	0.160148	0.621	0.509	1	CYTIP	0.769858
LUC7L3	0.170025	-0.136354	0.695	0.711	1	LUC7L3	0.769488
GLRX2	0.170431	0.150151	0.2	0.132	1	GLRX2	0.768451
ADAM8	0.170873	0.122066	0.368	0.272	1	ADAM8	0.767327
ZFYVE28	0.170937	0.145802	0.137	0.079	1	ZFYVE28	0.767163
PGRMC2	0.170937	-0.172935	0.074	0.132	1	PGRMC2	0.767163
ETFB	0.171103	0.159202	0.474	0.386	1	ETFB	0.766744
NAE1	0.17112	-0.198978	0.221	0.298	1	NAE1	0.7667
COX11	0.171126	-0.133555	0.158	0.237	1	COX11	0.766685
C16orf91	0.171215	-0.176869	0.105	0.167	1	C16orf91	0.766459
COIL	0.171247	0.122086	0.158	0.096	1	COIL	0.766377
RPF2	0.171557	0.148617	0.147	0.088	1	RPF2	0.765591
MMP25-AS1	0.171559	-0.126535	0.442	0.482	1	MMP25-AS1	0.765587
MICAL3	0.171734	0.0823486	0.116	0.061	1	MICAL3	0.765143
KAT5	0.171959	0.107792	0.126	0.07	1	KAT5	0.764575
MAN2C1	0.172052	0.129274	0.179	0.114	1	MAN2C1	0.764339
TRGC1	0.172123	0.149031	0.347	0.254	1	TRGC1	0.76416
CCDC159	0.172289	0.115494	0.137	0.079	1	CCDC159	0.763743
SFMBT2	0.172289	-0.14648	0.074	0.132	1	SFMBT2	0.763743
ZNRF2	0.172582	0.120421	0.263	0.184	1	ZNRF2	0.763005
SS18L2	0.172647	0.0904047	0.432	0.316	1	SS18L2	0.762841
RPS3	0.172791	-0.061026	1	1	1	RPS3	0.762478
SDHB	0.173292	-0.149865	0.168	0.246	1	SDHB	0.761221
VPS45	0.173376	0.141267	0.126	0.07	1	VPS45	0.761011
TESC	0.173376	0.104357	0.126	0.07	1	TESC	0.761011
CNOT2	0.17354	-0.163856	0.253	0.342	1	CNOT2	0.7606
ARL4C	0.173573	-0.192435	0.726	0.746	1	ARL4C	0.760517
CYB5R3	0.173707	0.119151	0.242	0.167	1	CYB5R3	0.760184
SELPLG	0.173919	0.104792	0.316	0.219	1	SELPLG	0.759653
CDC42	0.173972	-0.142665	0.8	0.754	1	CDC42	0.759521
RBPJ	0.174208	-0.219151	0.526	0.57	1	RBPJ	0.758931
TLE3	0.174312	0.0128737	0.263	0.167	1	TLE3	0.758673
ZNF230	0.174545	0.0517433	0.105	0.053	1	ZNF230	0.758094
AC004951.1	0.174714	0.0622201	0.116	0.061	1	AC004951.1	0.757672
SF3B4	0.174995	-0.174118	0.179	0.246	1	SF3B4	0.756974
CCT3	0.175	0.142496	0.642	0.526	1	CCT3	0.756962
JAK2	0.176132	0.100313	0.105	0.053	1	JAK2	0.754163
CAPN10	0.176218	0.0979013	0.116	0.061	1	CAPN10	0.753949
CHML	0.176218	0.0463849	0.116	0.061	1	CHML	0.753949
SENP1	0.176313	0.125745	0.168	0.105	1	SENP1	0.753715
CDIP1	0.176313	0.0883967	0.168	0.105	1	CDIP1	0.753715
LAMTOR5	0.176322	0.111861	0.589	0.474	1	LAMTOR5	0.753693
DOCK10	0.176687	0.164485	0.389	0.307	1	DOCK10	0.752795
PARP1	0.176968	0.0937732	0.558	0.412	1	PARP1	0.752105
CCDC152	0.177732	0.0765318	0.116	0.061	1	CCDC152	0.750233
EMB	0.178193	-0.122257	0.505	0.57	1	EMB	0.74911
ROCK2	0.178327	-0.163933	0.137	0.202	1	ROCK2	0.748783
AC093673.1	0.178503	-0.149717	0.105	0.167	1	AC093673.1	0.748355
FOXN3	0.178508	0.0524877	0.337	0.237	1	FOXN3	0.748342
HNRNPH1	0.178628	-0.216677	0.589	0.596	1	HNRNPH1	0.74805
ZFPM1	0.178894	0.107898	0.158	0.096	1	ZFPM1	0.747405
RRP1	0.178894	0.0914607	0.158	0.096	1	RRP1	0.747405
C19orf25	0.178968	0.142272	0.347	0.272	1	C19orf25	0.747225
PFDN5	0.179008	-0.102727	0.979	0.939	1	PFDN5	0.747128
BMS1	0.179092	0.110926	0.242	0.158	1	BMS1	0.746924
AP1S2	0.179141	-0.266445	0.158	0.219	1	AP1S2	0.746806
GATC	0.179167	0.0999516	0.137	0.079	1	GATC	0.746741
FUOM	0.179261	0.133483	0.179	0.114	1	FUOM	0.746515
POLR2F	0.179884	0.100811	0.358	0.254	1	POLR2F	0.745007
CTSS	0.179894	0.10528	0.389	0.289	1	CTSS	0.744982
SNRPC	0.17998	0.10836	0.432	0.342	1	SNRPC	0.744776
SART3	0.180483	0.106072	0.179	0.114	1	SART3	0.743563
FBH1	0.180567	0.113348	0.137	0.079	1	FBH1	0.743362
RBM28	0.18059	-0.158615	0.137	0.202	1	RBM28	0.743307
XRCC4	0.180593	0.0904442	0.126	0.07	1	XRCC4	0.7433
RNF169	0.180685	-0.14381	0.126	0.193	1	RNF169	0.743079
CAPN1	0.180698	-0.212618	0.189	0.246	1	CAPN1	0.743046
MED18	0.180789	0.068369	0.116	0.061	1	MED18	0.742827
CFL1	0.181262	0.0992558	0.989	0.965	1	CFL1	0.741694
RPL28	0.181264	0.0541543	1	0.991	1	RPL28	0.741688
RNF126	0.181377	0.125469	0.284	0.211	1	RNF126	0.741418
FAM98C	0.181713	0.0992695	0.179	0.114	1	FAM98C	0.740615
ATP2A2	0.181852	0.112848	0.2	0.132	1	ATP2A2	0.740283
HPS4	0.181975	0.0884156	0.137	0.079	1	HPS4	0.739988
HES6	0.182062	0.123823	0.126	0.07	1	HES6	0.73978
TMED1	0.182398	0.0279573	0.232	0.149	1	TMED1	0.738981
SRGAP3	0.182418	0.159558	0.316	0.228	1	SRGAP3	0.738933
ALKBH7	0.182441	0.118895	0.337	0.246	1	ALKBH7	0.738877
HAVCR2	0.183471	0.200885	0.379	0.298	1	HAVCR2	0.736432
POLG2	0.183541	0.105657	0.126	0.07	1	POLG2	0.736267
KMT2C	0.183696	-0.223287	0.284	0.351	1	KMT2C	0.7359
BRAF	0.183761	0.0866732	0.274	0.184	1	BRAF	0.735748
SRPK1	0.183879	0.0874799	0.295	0.202	1	SRPK1	0.735469
JAKMIP2	0.184024	0.143507	0.211	0.14	1	JAKMIP2	0.735126
DOK1	0.184302	0.014349	0.147	0.079	1	DOK1	0.734471
GCLM	0.184336	0.0773078	0.221	0.14	1	GCLM	0.734389
TGOLN2	0.184623	-0.163062	0.505	0.544	1	TGOLN2	0.733714
THUMPD2	0.18465	-0.127946	0.063	0.114	1	THUMPD2	0.733651
KLHL24	0.184748	-0.10747	0.095	0.158	1	KLHL24	0.73342
PPP1R15A	0.184931	0.128405	0.147	0.088	1	PPP1R15A	0.73299
MANEA-DT	0.185028	0.0729756	0.126	0.07	1	MANEA-DT	0.732762
2020-09-06	0.185256	0.177546	0.832	0.675	1	2020-09-06	0.732228
FTSJ3	0.185333	-0.141359	0.116	0.175	1	FTSJ3	0.732048
AK6	0.185437	0.115959	0.179	0.114	1	AK6	0.731804
TXLNG	0.185448	0.0315515	0.116	0.061	1	TXLNG	0.731778
KLRB1	0.185473	0.133221	0.926	0.851	1	KLRB1	0.731719
TESPA1	0.185726	0.122888	0.232	0.158	1	TESPA1	0.731128
RPL39	0.185805	-0.0685382	1	0.974	1	RPL39	0.730943
HAUS3	0.18588	0.0250521	0.105	0.053	1	HAUS3	0.730768
TRAPPC2B	0.18602	-0.134736	0.105	0.167	1	TRAPPC2B	0.730441
TRDC	0.186048	0.173098	0.916	0.912	1	TRDC	0.730376
EIF3L	0.186239	0.0791423	0.453	0.351	1	EIF3L	0.72993
KAT6A	0.186245	0.127488	0.337	0.246	1	KAT6A	0.729916
DNAJB2	0.18631	0.0962005	0.147	0.088	1	DNAJB2	0.729764
CD160	0.186791	0.18788	0.158	0.096	1	CD160	0.728643
PIGT	0.186914	0.109931	0.189	0.123	1	PIGT	0.728358
EIF2B4	0.18702	0.0708829	0.116	0.061	1	EIF2B4	0.728111
VPS8	0.187295	-0.134378	0.105	0.167	1	VPS8	0.727474
SRI	0.187454	0.132317	0.663	0.526	1	SRI	0.727106
CTSZ	0.187549	0.126513	0.305	0.211	1	CTSZ	0.726885
S100A10	0.187651	-0.105758	0.8	0.842	1	S100A10	0.726649
CEP95	0.187771	-0.104278	0.126	0.193	1	CEP95	0.726372
VPS13C	0.188085	0.168222	0.421	0.333	1	VPS13C	0.725646
SLC25A6	0.188226	-0.0595595	0.811	0.851	1	SLC25A6	0.72532
PGK1	0.188468	0.13243	0.642	0.535	1	PGK1	0.724762
HSD17B4	0.188576	-0.131599	0.105	0.167	1	HSD17B4	0.724513
ATP5MC1	0.188587	0.104078	0.537	0.404	1	ATP5MC1	0.724488
CEP170	0.188602	0.0594772	0.116	0.061	1	CEP170	0.724453
TRIOBP	0.189051	0.118618	0.168	0.105	1	TRIOBP	0.723422
NUDT2	0.189051	0.117954	0.168	0.105	1	NUDT2	0.723422
STRADA	0.189218	0.0625454	0.179	0.114	1	STRADA	0.723038
RBM26	0.189229	0.131747	0.379	0.289	1	RBM26	0.723013
ACSL5	0.189266	-0.126974	0.063	0.114	1	ACSL5	0.722928
SMYD3	0.189544	0.081271	0.126	0.07	1	SMYD3	0.722289
MACF1	0.189779	0.12772	0.653	0.553	1	MACF1	0.721753
LRPAP1	0.19018	0.113797	0.505	0.412	1	LRPAP1	0.720835
BPNT1	0.190195	0.0380021	0.116	0.061	1	BPNT1	0.720802
HSPH1	0.190248	0.124108	0.221	0.149	1	HSPH1	0.720679
HELZ2	0.190361	0.157022	0.168	0.105	1	HELZ2	0.720423
BOD1L1	0.190428	0.046045	0.684	0.518	1	BOD1L1	0.72027
HBS1L	0.19049	0.120564	0.179	0.114	1	HBS1L	0.720127
TMX2	0.19049	-0.0580348	0.105	0.175	1	TMX2	0.720127
C21orf2	0.190594	-0.141753	0.074	0.132	1	C21orf2	0.719891
RAB18	0.190679	0.121139	0.347	0.263	1	RAB18	0.719698
SNX6	0.190685	0.186334	0.589	0.526	1	SNX6	0.719683
MCTS1	0.190934	0.0402113	0.316	0.219	1	MCTS1	0.719116
LMBR1L	0.191037	-0.167041	0.137	0.202	1	LMBR1L	0.718883
TNIP2	0.191461	0.0896606	0.358	0.272	1	TNIP2	0.71792
ACADVL	0.19155	0.0880845	0.305	0.219	1	ACADVL	0.717718
U2SURP	0.191724	0.127534	0.526	0.404	1	U2SURP	0.717324
BBC3	0.191725	-0.172923	0.074	0.123	1	BBC3	0.717321
SP4	0.191725	-0.175268	0.074	0.123	1	SP4	0.717321
IKZF3	0.191775	0.177375	0.705	0.632	1	IKZF3	0.717209
IFT27	0.191796	0.046312	0.116	0.061	1	IFT27	0.717159
RPP30	0.191901	0.0575034	0.147	0.088	1	RPP30	0.716923
PRPF38A	0.191935	-0.163055	0.326	0.386	1	PRPF38A	0.716846
FAM3C	0.192031	0.0624285	0.242	0.167	1	FAM3C	0.71663
SCAF11	0.192125	-0.203069	0.653	0.737	1	SCAF11	0.716417
ABI2	0.192224	-0.176617	0.137	0.202	1	ABI2	0.716192
RBM39	0.192782	-0.15518	0.821	0.798	1	RBM39	0.714934
NUTM2B-AS1	0.193109	0.116794	0.389	0.289	1	NUTM2B-AS1	0.714197
RNF19B	0.193237	-0.0698079	0.053	0.105	1	RNF19B	0.71391
SMARCC2	0.193238	-0.220624	0.295	0.351	1	SMARCC2	0.713907
MICAL1	0.193317	0.108296	0.147	0.088	1	MICAL1	0.713729
PPP3R1	0.193317	-0.178222	0.084	0.14	1	PPP3R1	0.713729
ALG13	0.193501	-0.164739	0.2	0.272	1	ALG13	0.713318
GORASP2	0.193533	-0.0975854	0.074	0.132	1	GORASP2	0.713246
RANBP3	0.193567	-0.1807	0.095	0.149	1	RANBP3	0.713168
IMMT	0.193589	0.102413	0.305	0.219	1	IMMT	0.71312
PICALM	0.193739	-0.173761	0.147	0.211	1	PICALM	0.712784
LAS1L	0.193768	-0.155754	0.105	0.167	1	LAS1L	0.712719
TNIK	0.194331	0.0907204	0.168	0.105	1	TNIK	0.711458
TNFRSF1A	0.194576	0.103598	0.347	0.246	1	TNFRSF1A	0.710911
ZDHHC18	0.194912	-0.192973	0.147	0.211	1	ZDHHC18	0.71016
POP5	0.195604	0.105111	0.368	0.272	1	POP5	0.708623
PDLIM2	0.195627	0.141387	0.389	0.307	1	PDLIM2	0.708572
UBLCP1	0.195659	0.102223	0.253	0.175	1	UBLCP1	0.708501
METTL5	0.195915	0.109507	0.358	0.263	1	METTL5	0.707933
SNX2	0.196139	0.117463	0.242	0.175	1	SNX2	0.707437
CASP7	0.196174	0.0799319	0.147	0.088	1	CASP7	0.707358
MTREX	0.196174	-0.128522	0.084	0.14	1	MTREX	0.707358
GON4L	0.19689	0.0478006	0.358	0.263	1	GON4L	0.705777
PPA1	0.19704	0.106871	0.347	0.254	1	PPA1	0.705446
NAPEPLD	0.197147	-0.126683	0.063	0.114	1	NAPEPLD	0.705211
TEDC1	0.197147	-0.139075	0.063	0.114	1	TEDC1	0.705211
STK38L	0.197147	-0.143204	0.063	0.114	1	STK38L	0.705211
SP110	0.197541	0.13922	0.484	0.395	1	SP110	0.704342
AKAP8	0.197614	0.0305955	0.147	0.088	1	AKAP8	0.704182
DHRS1	0.197614	-0.141878	0.084	0.14	1	DHRS1	0.704182
NKAP	0.197775	0.133511	0.263	0.184	1	NKAP	0.703828
GPR108	0.197852	-0.110844	0.211	0.281	1	GPR108	0.70366
TMSB10	0.197925	0.0343202	1	1	1	TMSB10	0.703499
AC008105.3	0.198046	-0.125591	0.347	0.43	1	AC008105.3	0.703234
SPTLC1	0.19826	0.0947038	0.179	0.114	1	SPTLC1	0.702766
CCDC22	0.198303	0.0398862	0.116	0.061	1	CCDC22	0.70267
SLC25A32	0.198303	0.0151964	0.116	0.061	1	SLC25A32	0.70267
TMEM14A	0.198781	-0.111743	0.126	0.193	1	TMEM14A	0.701625
CDKN2C	0.198819	0.050314	0.126	0.07	1	CDKN2C	0.701543
RANBP9	0.199039	0.0977902	0.168	0.105	1	RANBP9	0.701062
SUZ12	0.199188	0.120838	0.368	0.263	1	SUZ12	0.700737
CCNB1IP1	0.199619	0.0638726	0.221	0.14	1	CCNB1IP1	0.699799
CTSW	0.199633	0.141245	0.947	0.842	1	CTSW	0.699767
YEATS4	0.199955	0.0357246	0.116	0.061	1	YEATS4	0.699068
ADGRG3	0.199975	0.0395979	0.242	0.167	1	ADGRG3	0.699024
CWC15	0.200129	0.0184226	0.547	0.412	1	CWC15	0.698691
KIAA1468	0.200365	-0.109283	0.063	0.114	1	KIAA1468	0.698177
ATPAF1	0.200396	0.0492329	0.126	0.07	1	ATPAF1	0.698111
NADK	0.200517	0.0897443	0.147	0.088	1	NADK	0.697849
LIN7C	0.200517	0.0833434	0.147	0.088	1	LIN7C	0.697849
GALK1	0.200517	0.0454285	0.147	0.088	1	GALK1	0.697849
PLPP5	0.200517	-0.0956485	0.084	0.14	1	PLPP5	0.697849
RAB11A	0.200667	0.109269	0.316	0.237	1	RAB11A	0.697524
HNRNPD	0.201091	0.106015	0.663	0.561	1	HNRNPD	0.696608
CNOT1	0.201283	-0.229425	0.179	0.237	1	CNOT1	0.696193
METTL18	0.201921	-0.121012	0.126	0.193	1	METTL18	0.694818
AC006033.2	0.20198	-0.121443	0.084	0.14	1	AC006033.2	0.694692
PTPN22	0.20219	0.140257	0.611	0.491	1	PTPN22	0.694241
PLIN3	0.202453	0.0787847	0.168	0.105	1	PLIN3	0.693675
LY9	0.202548	0.0924843	0.137	0.079	1	LY9	0.693471
TRIM4	0.202661	-0.102199	0.137	0.211	1	TRIM4	0.69323
NDUFA4	0.20269	0.121056	0.863	0.754	1	NDUFA4	0.693168
PSMB6	0.202947	0.0717713	0.589	0.474	1	PSMB6	0.692616
SMC2	0.202968	0.10011	0.232	0.158	1	SMC2	0.692572
PIN1	0.203017	-0.138168	0.411	0.439	1	PIN1	0.692469
PRKX	0.203018	0.159253	0.453	0.377	1	PRKX	0.692466
NRIP1	0.20333	-0.018958	0.2	0.123	1	NRIP1	0.6918
CD2AP	0.203553	0.0473941	0.253	0.167	1	CD2AP	0.691322
FNIP1	0.20371	-0.14326	0.211	0.281	1	FNIP1	0.690987
PPIF	0.203831	0.085349	0.168	0.105	1	PPIF	0.69073
POP7	0.203988	0.0681937	0.189	0.123	1	POP7	0.690396
RPL19	0.204402	0.0914091	1	1	1	RPL19	0.689515
NDUFB8	0.204483	0.127209	0.663	0.535	1	NDUFB8	0.689343
FNDC3A	0.204518	-0.171335	0.116	0.175	1	FNDC3A	0.689268
GPAA1	0.204714	-0.113883	0.168	0.246	1	GPAA1	0.688853
DBP	0.204781	0.0901558	0.158	0.096	1	DBP	0.68871
NUP43	0.204781	0.0845018	0.158	0.096	1	NUP43	0.68871
RPL34	0.204812	-0.0743387	1	1	1	RPL34	0.688645
PPFIA1	0.204929	0.0883385	0.147	0.088	1	PPFIA1	0.688396
STK10	0.204949	0.1464	0.442	0.351	1	STK10	0.688354
DUSP11	0.205023	0.104267	0.211	0.14	1	DUSP11	0.688196
ATMIN	0.205215	0.0740163	0.168	0.105	1	ATMIN	0.687791
YY1	0.205415	-0.166801	0.432	0.509	1	YY1	0.687367
MRPL10	0.205648	-0.0999157	0.137	0.202	1	MRPL10	0.686875
GPR68	0.205795	-0.0460309	0.158	0.237	1	GPR68	0.686565
RPL4	0.206381	-0.103955	0.884	0.86	1	RPL4	0.68533
CARD8-AS1	0.206416	-0.128629	0.084	0.14	1	CARD8-AS1	0.685258
CCDC88B	0.206458	0.150546	0.242	0.175	1	CCDC88B	0.685167
TBRG4	0.206606	0.0589761	0.168	0.105	1	TBRG4	0.684857
B3GNT2	0.206611	0.0759537	0.189	0.123	1	B3GNT2	0.684847
RPL38	0.206748	-0.146356	0.937	0.904	1	RPL38	0.684558
SERPINB6	0.206904	0.0698759	0.537	0.43	1	SERPINB6	0.68423
PLRG1	0.207886	-0.171311	0.189	0.246	1	PLRG1	0.682176
TCERG1	0.208161	0.0746674	0.211	0.14	1	TCERG1	0.681601
ST8SIA4	0.208187	0.101242	0.253	0.175	1	ST8SIA4	0.681547
WDFY1	0.20842	0.0517473	0.126	0.07	1	WDFY1	0.68106
PPP4R2	0.20848	0.0584098	0.305	0.211	1	PPP4R2	0.680936
GZMK	0.208562	0.146072	0.474	0.368	1	GZMK	0.680765
MTHFR	0.208727	0.0708975	0.137	0.079	1	MTHFR	0.680422
LCOR	0.208967	0.105187	0.232	0.158	1	LCOR	0.679922
GANAB	0.209032	0.103145	0.263	0.184	1	GANAB	0.679788
ANKRD13A	0.209106	0.0544802	0.158	0.096	1	ANKRD13A	0.679633
OTULINL	0.209121	0.0852535	0.379	0.272	1	OTULINL	0.679603
BUD23	0.209407	0.0895931	0.221	0.149	1	BUD23	0.679008
PHF10	0.20997	-0.100097	0.105	0.167	1	PHF10	0.677843
YBX1	0.210076	0.0722441	0.874	0.772	1	YBX1	0.677623
UBXN6	0.210292	0.0156896	0.137	0.079	1	UBXN6	0.677177
TRAM1	0.210322	-0.225917	0.337	0.377	1	TRAM1	0.677116
MRPL41	0.210414	-0.113849	0.453	0.535	1	MRPL41	0.676926
JAGN1	0.210429	0.123613	0.358	0.281	1	JAGN1	0.676894
RPS17	0.210465	0.156894	0.221	0.158	1	RPS17	0.67682
SH3BP5	0.21054	-0.235737	0.137	0.193	1	SH3BP5	0.676665
MGAT2	0.210695	-0.122978	0.137	0.202	1	MGAT2	0.676346
CHD1	0.210796	0.0853093	0.295	0.211	1	CHD1	0.676138
GMCL1	0.21156	0.109512	0.2	0.132	1	GMCL1	0.674566
TATDN3	0.211694	0.0267576	0.126	0.07	1	TATDN3	0.674291
RNMT	0.211835	-0.162811	0.263	0.316	1	RNMT	0.674002
USB1	0.212439	0.07177	0.147	0.088	1	USB1	0.672765
TRMT10C	0.212862	-0.231136	0.221	0.281	1	TRMT10C	0.671902
KRAS	0.212884	0.0767952	0.411	0.307	1	KRAS	0.671857
YPEL3	0.213049	-0.16847	0.684	0.684	1	YPEL3	0.671521
SOD1	0.213275	0.134051	0.737	0.658	1	SOD1	0.671059
RAPGEF1	0.213497	-0.140275	0.095	0.149	1	RAPGEF1	0.670609
GNA13	0.213559	-0.100688	0.147	0.219	1	GNA13	0.670482
ZNF595	0.213664	-0.200979	0.105	0.158	1	ZNF595	0.670268
ATP8B4	0.21368	0.101121	0.368	0.281	1	ATP8B4	0.670236
HSPE1	0.214248	0.0739353	0.547	0.43	1	HSPE1	0.669084
TRIM8	0.215261	-0.146629	0.179	0.237	1	TRIM8	0.667035
SUPT5H	0.215277	0.103028	0.232	0.167	1	SUPT5H	0.667003
TMED9	0.215454	0.0872437	0.379	0.289	1	TMED9	0.666645
P2RX4	0.215498	-0.120157	0.084	0.14	1	P2RX4	0.666556
SREK1	0.2163	0.0993288	0.347	0.263	1	SREK1	0.664943
EFHD2	0.216425	0.163078	0.653	0.614	1	EFHD2	0.664693
VPS33A	0.21646	-0.153438	0.095	0.149	1	VPS33A	0.664621
DGCR8	0.216536	0.0154999	0.168	0.105	1	DGCR8	0.66447
SERPINB1	0.21702	0.126631	0.611	0.518	1	SERPINB1	0.663499
NFIC	0.21704	0.0739466	0.147	0.088	1	NFIC	0.66346
ICAM2	0.217183	-0.106431	0.179	0.254	1	ICAM2	0.663175
TPGS2	0.217348	0.0688113	0.189	0.123	1	TPGS2	0.662845
SMARCE1	0.217577	0.08185	0.274	0.193	1	SMARCE1	0.662387
SECISBP2	0.217577	0.0746324	0.274	0.193	1	SECISBP2	0.662387
MRPL27	0.21765	0.0776553	0.316	0.237	1	MRPL27	0.662242
ELMOD2	0.217765	0.12732	0.137	0.088	1	ELMOD2	0.662012
NHLRC2	0.217894	0.130858	0.116	0.07	1	NHLRC2	0.661754
GMIP	0.217982	-0.201613	0.105	0.158	1	GMIP	0.66158
SUDS3	0.218087	-0.120028	0.116	0.175	1	SUDS3	0.66137
HMGB1	0.218232	0.093826	0.979	0.947	1	HMGB1	0.661081
DLGAP1-AS1	0.218379	0.109441	0.211	0.149	1	DLGAP1-AS1	0.660789
SRBD1	0.218589	0.0209072	0.147	0.088	1	SRBD1	0.660371
PLEKHM1	0.218756	-0.0852124	0.063	0.114	1	PLEKHM1	0.660041
MAGED2	0.218829	-0.214539	0.284	0.351	1	MAGED2	0.659895
ZFP36	0.218831	-0.165614	0.158	0.219	1	ZFP36	0.659892
RPS6KA3	0.218944	-0.18471	0.358	0.439	1	RPS6KA3	0.659667
ERO1A	0.219031	0.0398421	0.242	0.167	1	ERO1A	0.659495
ANKRD36C	0.219494	-0.167321	0.147	0.211	1	ANKRD36C	0.658577
OAZ2	0.220094	0.0614555	0.189	0.123	1	OAZ2	0.657393
PIAS2	0.220105	-0.23952	0.116	0.167	1	PIAS2	0.65737
P4HTM	0.220146	0.0486038	0.147	0.088	1	P4HTM	0.657288
HPF1	0.220323	0.120579	0.211	0.149	1	HPF1	0.65694
RPLP2	0.2204	0.0427602	1	0.991	1	RPLP2	0.656789
RAD23B	0.22078	-0.143829	0.147	0.211	1	RAD23B	0.656041
NSMCE2	0.220895	-0.178847	0.105	0.158	1	NSMCE2	0.655815
SLC39A1	0.221476	0.0549872	0.189	0.123	1	SLC39A1	0.654674
SAR1A	0.22211	-0.164163	0.305	0.377	1	SAR1A	0.653433
PRH1	0.222265	0.0800075	0.274	0.193	1	PRH1	0.653128
ELMO1	0.222362	-0.155429	0.105	0.158	1	ELMO1	0.65294
C11orf68	0.222477	-0.145072	0.095	0.149	1	C11orf68	0.652716
SMIM7	0.222674	-0.150893	0.305	0.368	1	SMIM7	0.65233
FBXL5	0.222952	-0.185453	0.116	0.167	1	FBXL5	0.651788
ATP6V0A2	0.222988	0.13643	0.147	0.096	1	ATP6V0A2	0.651718
NAP1L1	0.223047	-0.162389	0.463	0.5	1	NAP1L1	0.651604
ANAPC4	0.223124	0.0251021	0.137	0.079	1	ANAPC4	0.651454
RBM12B	0.22356	0.0709305	0.2	0.132	1	RBM12B	0.650606
TGFBR2	0.223577	0.0357214	0.347	0.246	1	TGFBR2	0.650573
LRCH4	0.224203	0.14594	0.168	0.114	1	LRCH4	0.649358
TMEM30A	0.224923	-0.084103	0.126	0.193	1	TMEM30A	0.647967
ACBD3	0.225097	0.124026	0.284	0.211	1	ACBD3	0.64763
P2RY11	0.225118	-0.131999	0.074	0.123	1	P2RY11	0.647589
SMAD5	0.225118	-0.152453	0.074	0.123	1	SMAD5	0.647589
CCDC32	0.225163	-0.143555	0.158	0.219	1	CCDC32	0.647503
PPIH	0.225357	0.174472	0.189	0.132	1	PPIH	0.64713
ARHGAP15	0.225613	0.0692205	0.411	0.325	1	ARHGAP15	0.646636
METTL26	0.226034	-0.156455	0.484	0.509	1	METTL26	0.645827
H3F3B	0.226073	0.0987989	1	0.974	1	H3F3B	0.645752
AC084033.3	0.226099	0.12077	0.147	0.096	1	AC084033.3	0.645701
CDKN2D	0.226389	0.0167554	0.432	0.316	1	CDKN2D	0.645144
EEF1D	0.226445	0.081114	0.937	0.93	1	EEF1D	0.645038
GNPTAB	0.226449	-0.13639	0.4	0.456	1	GNPTAB	0.645029
M6PR	0.226473	0.057685	0.442	0.333	1	M6PR	0.644983
DNAJB14	0.226815	0.0835164	0.421	0.342	1	DNAJB14	0.644327
HELB	0.226913	0.119723	0.221	0.158	1	HELB	0.64414
PTPRJ	0.226977	0.1254	0.274	0.211	1	PTPRJ	0.644018
PTGER2	0.227073	0.100919	0.326	0.246	1	PTGER2	0.643834
MYSM1	0.227142	-0.127652	0.179	0.246	1	MYSM1	0.643703
HOPX	0.227219	-0.179786	0.853	0.868	1	HOPX	0.643556
PHLDA1	0.227384	0.162826	0.137	0.088	1	PHLDA1	0.64324
TSC1	0.227504	-0.0640731	0.063	0.114	1	TSC1	0.643011
TXLNA	0.227654	0.110159	0.126	0.079	1	TXLNA	0.642725
TNIP1	0.227665	0.145206	0.316	0.246	1	TNIP1	0.642704
CBX4	0.227963	-0.102554	0.116	0.175	1	CBX4	0.642136
TRIM27	0.227995	0.0338568	0.263	0.184	1	TRIM27	0.642075
NDUFS2	0.228211	0.0837087	0.442	0.351	1	NDUFS2	0.641664
PRRC2B	0.228445	-0.130749	0.305	0.36	1	PRRC2B	0.641218
CCNG1	0.228503	-0.139891	0.074	0.123	1	CCNG1	0.641108
NDUFAF1	0.228612	0.0292588	0.158	0.096	1	NDUFAF1	0.640902
ZNF33B	0.228612	-0.112873	0.095	0.149	1	ZNF33B	0.640902
PPP2R3C	0.229062	-0.138072	0.137	0.202	1	PPP2R3C	0.640047
DENND4A	0.229557	-0.141503	0.147	0.202	1	DENND4A	0.63911
DYRK1A	0.22961	0.122018	0.253	0.184	1	DYRK1A	0.639009
COMMD4	0.22991	0.120905	0.305	0.246	1	COMMD4	0.638442
ZNF787	0.229925	-0.184657	0.179	0.237	1	ZNF787	0.638415
NELFA	0.23008	0.124222	0.158	0.105	1	NELFA	0.638121
GIMAP5	0.230164	0.0380472	0.158	0.096	1	GIMAP5	0.637963
CASD1	0.230209	-0.119492	0.074	0.123	1	CASD1	0.637878
PKN1	0.230288	0.106054	0.453	0.351	1	PKN1	0.637728
PTAR1	0.230417	0.0500014	0.211	0.14	1	PTAR1	0.637486
ANXA6	0.230815	0.0708555	0.463	0.36	1	ANXA6	0.636736
TMEM60	0.230944	-0.156293	0.168	0.228	1	TMEM60	0.636494
RPS27A	0.230955	-0.0594051	1	1	1	RPS27A	0.636472
ARAP2	0.231149	0.145429	0.505	0.43	1	ARAP2	0.636107
VPS13D	0.23131	-0.16211	0.105	0.158	1	VPS13D	0.635806
MRPL57	0.23151	0.0795597	0.6	0.491	1	MRPL57	0.635431
HAGH	0.231513	-0.165295	0.389	0.456	1	HAGH	0.635425
CORO7	0.231616	0.133548	0.147	0.096	1	CORO7	0.635231
SLTM	0.231676	0.0974553	0.558	0.474	1	SLTM	0.635119
TMEM216	0.231724	-0.116488	0.095	0.149	1	TMEM216	0.635029
POLK	0.232424	-0.136235	0.189	0.254	1	POLK	0.63372
CIAPIN1	0.232785	0.120595	0.126	0.079	1	CIAPIN1	0.633045
UBR5	0.232922	0.065026	0.263	0.184	1	UBR5	0.63279
TMEM80	0.233291	-0.0791443	0.095	0.149	1	TMEM80	0.632102
MRPS22	0.233291	-0.0886148	0.095	0.149	1	MRPS22	0.632102
TMSB4X	0.23365	0.0511408	1	1	1	TMSB4X	0.631435
TTC21B	0.233775	0.12697	0.116	0.07	1	TTC21B	0.631202
WASF2	0.233993	0.0896644	0.516	0.395	1	WASF2	0.630798
NUTF2	0.234141	0.0969664	0.284	0.202	1	NUTF2	0.630523
CBX3	0.234457	0.138155	0.611	0.5	1	CBX3	0.629936
SRSF11	0.23463	-0.22436	0.484	0.509	1	SRSF11	0.629616
CHMP2B	0.234865	0.114009	0.274	0.202	1	CHMP2B	0.629182
ANKRA2	0.234866	-0.211734	0.095	0.149	1	ANKRA2	0.62918
UBXN4	0.23492	0.0707208	0.705	0.57	1	UBXN4	0.629079
CCDC167	0.234967	0.0764088	0.253	0.175	1	CCDC167	0.628993
AHI1	0.235039	-0.209108	0.242	0.307	1	AHI1	0.628861
FSD1	0.235153	0.112075	0.105	0.061	1	FSD1	0.628649
GGCT	0.235199	0.117815	0.189	0.132	1	GGCT	0.628565
NDRG3	0.235381	-0.108678	0.074	0.123	1	NDRG3	0.628229
ABI1	0.235565	-0.171743	0.158	0.219	1	ABI1	0.62789
ZNF652	0.23577	0.0777887	0.305	0.211	1	ZNF652	0.627512
LARP7	0.235782	0.0456372	0.442	0.342	1	LARP7	0.62749
MRPL39	0.235878	-0.142082	0.105	0.158	1	MRPL39	0.627312
MRPL48	0.236076	0.141862	0.168	0.114	1	MRPL48	0.626947
CDK6	0.236319	0.116884	0.211	0.149	1	CDK6	0.626502
TM7SF3	0.236422	0.108566	0.147	0.096	1	TM7SF3	0.626313
KARS	0.236629	0.0982491	0.189	0.132	1	KARS	0.625932
HACD4	0.236629	-0.117516	0.126	0.184	1	HACD4	0.625932
USP4	0.236678	0.117046	0.179	0.123	1	USP4	0.625842
FAM104B	0.23707	0.10235	0.105	0.061	1	FAM104B	0.625124
MCM7	0.23723	0.148474	0.147	0.096	1	MCM7	0.624831
TMEM183A	0.23723	0.0948408	0.147	0.096	1	TMEM183A	0.624831
USP25	0.237455	0.0810583	0.2	0.132	1	USP25	0.624419
PHKG2	0.238153	0.124009	0.179	0.123	1	PHKG2	0.623144
PTTG1	0.238153	0.121334	0.179	0.123	1	PTTG1	0.623144
CDK11B	0.238153	-0.109608	0.116	0.175	1	CDK11B	0.623144
TMEM223	0.238498	0.0715251	0.295	0.211	1	TMEM223	0.622515
HLA-F	0.238568	0.0918635	0.842	0.763	1	HLA-F	0.622387
RAB11B	0.238819	-0.0890922	0.242	0.325	1	RAB11B	0.621931
ZNF124	0.238997	0.116724	0.105	0.061	1	ZNF124	0.621607
GPN3	0.239113	0.137801	0.168	0.114	1	GPN3	0.621397
AL133453.1	0.239113	0.0542265	0.168	0.114	1	AL133453.1	0.621397
FBXL15	0.239776	-0.14309	0.2	0.263	1	FBXL15	0.620193
TIAL1	0.240049	-0.163252	0.305	0.377	1	TIAL1	0.6197
GOLGA5	0.240167	-0.0529389	0.063	0.114	1	GOLGA5	0.619487
MDH2	0.240467	0.0806228	0.442	0.342	1	MDH2	0.618944
ZC3H13	0.240467	-0.177488	0.368	0.404	1	ZC3H13	0.618944
NELFCD	0.240553	0.156178	0.284	0.228	1	NELFCD	0.618789
ZNF7	0.240706	0.0548008	0.221	0.149	1	ZNF7	0.618514
SLC25A33	0.240755	-0.154212	0.063	0.105	1	SLC25A33	0.618425
PSMB2	0.24096	0.0622383	0.547	0.439	1	PSMB2	0.618055
IARS2	0.241072	0.134203	0.242	0.175	1	IARS2	0.617853
TNK2	0.24109	0.0979352	0.116	0.07	1	TNK2	0.617821
HIST1H2AC	0.241118	-0.0163152	0.147	0.088	1	HIST1H2AC	0.61777
POLR2J3.1	0.241402	0.0967351	0.579	0.491	1	POLR2J3.1	0.61726
TMOD3	0.241503	0.135335	0.4	0.307	1	TMOD3	0.617078
ZEB2	0.241834	-0.161799	0.211	0.272	1	ZEB2	0.616482
EIF4E2	0.241872	0.102636	0.326	0.246	1	EIF4E2	0.616414
DHRS3	0.242128	-0.162473	0.389	0.456	1	DHRS3	0.615954
FAM49B	0.24218	-0.0850527	0.726	0.746	1	FAM49B	0.615861
ADA2	0.242556	0.111907	0.158	0.105	1	ADA2	0.615187
LST1	0.242885	0.158066	0.105	0.061	1	LST1	0.614599
TOMM20	0.243101	0.116753	0.611	0.5	1	TOMM20	0.614214
ROCK1	0.243113	0.084791	0.611	0.518	1	ROCK1	0.614192
CPSF4	0.243292	0.081715	0.126	0.079	1	CPSF4	0.613872
HCLS1	0.243356	0.0867772	0.579	0.491	1	HCLS1	0.613758
PIK3IP1	0.243444	-0.245043	0.389	0.439	1	PIK3IP1	0.613601
NDUFA2	0.243621	0.0989271	0.568	0.482	1	NDUFA2	0.613285
ATP13A1	0.243634	-0.139998	0.105	0.158	1	ATP13A1	0.613262
OGFR	0.243678	0.0788281	0.284	0.211	1	OGFR	0.613183
BRMS1	0.243756	0.0337431	0.326	0.237	1	BRMS1	0.613045
IPO7	0.243761	0.116005	0.147	0.096	1	IPO7	0.613035
SYNE2	0.244044	-0.19586	0.432	0.491	1	SYNE2	0.612532
TAF1B	0.244182	-0.0882694	0.074	0.123	1	TAF1B	0.612286
MRPL35	0.244512	-0.135185	0.137	0.193	1	MRPL35	0.611699
CLK3	0.244512	-0.161557	0.137	0.193	1	CLK3	0.611699
2020-09-07	0.244543	-0.0689894	0.916	0.93	1	2020-09-07	0.611644
KCTD7	0.244561	-0.132614	0.063	0.105	1	KCTD7	0.611612
TXNDC9	0.244602	0.0830594	0.337	0.246	1	TXNDC9	0.61154
HMGN2	0.244737	-0.116415	0.642	0.658	1	HMGN2	0.6113
MLH3	0.244939	-0.149914	0.084	0.132	1	MLH3	0.610942
ZDHHC20	0.245152	-0.195037	0.116	0.167	1	ZDHHC20	0.610565
SUPT16H	0.245223	-0.189139	0.4	0.447	1	SUPT16H	0.610439
ZBTB24	0.24593	0.0354616	0.189	0.123	1	ZBTB24	0.609188
ASNA1	0.24597	0.0455857	0.337	0.237	1	ASNA1	0.609118
CDK19	0.24597	-0.0885437	0.074	0.123	1	CDK19	0.609118
TMPO	0.246297	0.0978014	0.453	0.36	1	TMPO	0.60854
UIMC1	0.246817	0.117713	0.105	0.061	1	UIMC1	0.607624
C11orf49	0.246817	0.0930133	0.105	0.061	1	C11orf49	0.607624
SIPA1L1	0.246867	0.113233	0.126	0.079	1	SIPA1L1	0.607536
TOR1AIP1	0.247008	0.11965	0.221	0.158	1	TOR1AIP1	0.60729
SLF1	0.247042	0.245543	0.284	0.219	1	SLF1	0.60723
PTPN18	0.247042	0.122007	0.284	0.219	1	PTPN18	0.60723
SRSF7	0.247275	-0.08796	0.811	0.754	1	SRSF7	0.60682
IL10RA	0.247306	-0.153303	0.453	0.491	1	IL10RA	0.606766
FAR1	0.247425	-0.195766	0.126	0.175	1	FAR1	0.606556
ZBTB8OS	0.248025	-0.183467	0.305	0.36	1	ZBTB8OS	0.605505
FDPS	0.248111	0.0774373	0.516	0.421	1	FDPS	0.605354
PSTPIP1	0.248178	0.183717	0.347	0.298	1	PSTPIP1	0.605237
DDX6	0.248228	0.0883718	0.526	0.421	1	DDX6	0.605149
CD151	0.248295	0.1172	0.189	0.132	1	CD151	0.605032
HRAS	0.248295	0.104667	0.189	0.132	1	HRAS	0.605032
APMAP	0.248428	0.122704	0.495	0.404	1	APMAP	0.604799
TGDS	0.248669	0.0810099	0.126	0.079	1	TGDS	0.604379
NCBP2-AS2	0.248792	0.105199	0.263	0.193	1	NCBP2-AS2	0.604163
WRN	0.2488	0.10378	0.105	0.061	1	WRN	0.604149
RNASEL	0.2488	0.0803114	0.105	0.061	1	RNASEL	0.604149
RBMX2	0.248927	0.0381934	0.189	0.123	1	RBMX2	0.603928
SCAMP2	0.248929	0.0836039	0.4	0.316	1	SCAMP2	0.603925
MAPK1IP1L	0.248993	0.08278	0.242	0.175	1	MAPK1IP1L	0.603813
LFNG	0.249771	0.0533536	0.179	0.114	1	LFNG	0.602457
SDHAF3	0.249772	0.0234971	0.179	0.114	1	SDHAF3	0.602457
GLCCI1	0.249879	-0.168129	0.253	0.333	1	GLCCI1	0.602271
SNRPN	0.250035	0.0893214	0.442	0.342	1	SNRPN	0.602
CASP8	0.250035	-0.019472	0.453	0.333	1	CASP8	0.601999
ACAA2	0.25009	0.0942496	0.347	0.263	1	ACAA2	0.601903
TMED7	0.250125	-0.168595	0.084	0.132	1	TMED7	0.601843
MLKL	0.250125	-0.198665	0.084	0.132	1	MLKL	0.601843
GABARAPL2	0.250184	0.0382096	0.653	0.491	1	GABARAPL2	0.60174
PLEKHB2	0.250473	-0.137594	0.137	0.184	1	PLEKHB2	0.601239
NIP7	0.250562	0.0653574	0.253	0.175	1	NIP7	0.601085
CRLF3	0.250562	-0.148918	0.179	0.237	1	CRLF3	0.601085
STYX	0.250591	0.107643	0.158	0.105	1	STYX	0.601034
ASTE1	0.250794	0.0528524	0.105	0.061	1	ASTE1	0.600683
MRPL52	0.250845	0.112161	0.389	0.316	1	MRPL52	0.600595
NAA35	0.250997	0.0981611	0.137	0.088	1	NAA35	0.600332
C12orf49	0.250997	0.0691905	0.137	0.088	1	C12orf49	0.600332
RPS3A	0.25123	-0.0482661	1	1	1	RPS3A	0.599928
TSC22D1	0.251325	-0.150566	0.116	0.167	1	TSC22D1	0.599764
TFDP2	0.251357	0.0817294	0.242	0.167	1	TFDP2	0.599709
NIFK	0.251402	0.058777	0.4	0.307	1	NIFK	0.599631
EIF4A3	0.251492	0.0521975	0.326	0.237	1	EIF4A3	0.599475
TMED3	0.251745	-0.107371	0.137	0.193	1	TMED3	0.59904
FUT11	0.251871	-0.150563	0.084	0.132	1	FUT11	0.598822
GZMA	0.251877	0.157359	0.768	0.719	1	GZMA	0.598812
LINS1	0.252221	0.122285	0.158	0.105	1	LINS1	0.59822
SMIM15	0.252266	-0.177521	0.263	0.307	1	SMIM15	0.598142
ARPC5	0.25232	0.127947	0.789	0.667	1	ARPC5	0.598048
RASSF3	0.252363	0.0919537	0.116	0.07	1	RASSF3	0.597975
AIMP1	0.252507	0.0895147	0.326	0.246	1	AIMP1	0.597726
RPL29	0.252656	0.0662513	1	1	1	RPL29	0.59747
ORC3	0.252798	0.0708469	0.105	0.061	1	ORC3	0.597226
SLC25A45	0.25302	0.090472	0.242	0.175	1	SLC25A45	0.596844
POM121	0.253037	0.0896827	0.158	0.105	1	POM121	0.596815
MIGA1	0.253038	-0.186885	0.105	0.149	1	MIGA1	0.596815
ZNF561	0.253118	0.0813695	0.168	0.114	1	ZNF561	0.596676
INO80	0.253175	-0.11924	0.105	0.158	1	INO80	0.596579
TMEM131L	0.253175	-0.125118	0.105	0.158	1	TMEM131L	0.596579
SPG7	0.253383	-0.149532	0.211	0.263	1	SPG7	0.596222
ABCD4	0.253432	0.074982	0.2	0.132	1	ABCD4	0.596138
EIF6	0.25371	0.109605	0.421	0.342	1	EIF6	0.595663
ZDHHC7	0.253794	0.112878	0.147	0.096	1	ZDHHC7	0.595519
ZNF350	0.253794	0.0805552	0.147	0.096	1	ZNF350	0.595519
RBM25	0.253969	0.141954	0.663	0.579	1	RBM25	0.59522
HOXB2	0.254059	0.103026	0.295	0.219	1	HOXB2	0.595066
ELK3	0.254262	-0.114314	0.063	0.105	1	ELK3	0.594718
C1orf52	0.254452	0.0227196	0.179	0.114	1	C1orf52	0.594394
EMSY	0.254809	-0.0876281	0.116	0.175	1	EMSY	0.593786
IKBKE	0.254815	0.0703485	0.105	0.061	1	IKBKE	0.593775
DNAJB1	0.254815	0.0697973	0.105	0.061	1	DNAJB1	0.593775
SLC2A3	0.255274	-0.159823	0.242	0.298	1	SLC2A3	0.592994
ARL2BP	0.255298	0.119156	0.263	0.193	1	ARL2BP	0.592953
PCNT	0.255501	0.0934136	0.158	0.105	1	PCNT	0.592608
STK24	0.255731	0.0867823	0.242	0.175	1	STK24	0.592217
VAV1	0.255759	0.0895187	0.232	0.167	1	VAV1	0.59217
UQCRC1	0.255975	-0.130645	0.158	0.219	1	UQCRC1	0.591803
RALY	0.256138	0.0716229	0.4	0.298	1	RALY	0.591527
KAT7	0.256155	0.0198554	0.2	0.14	1	KAT7	0.591497
SNRPA1	0.256182	-0.123379	0.274	0.342	1	SNRPA1	0.591451
PLEKHO2	0.2562	0.0685412	0.116	0.07	1	PLEKHO2	0.59142
PARN	0.256272	0.0578869	0.137	0.088	1	PARN	0.591299
C8orf76	0.256362	0.101113	0.179	0.123	1	C8orf76	0.591146
RAB11FIP4	0.256842	0.0710347	0.105	0.061	1	RAB11FIP4	0.590333
GALNT1	0.256948	0.119201	0.316	0.246	1	GALNT1	0.590155
NFKBIA	0.256995	-0.211717	0.411	0.482	1	NFKBIA	0.590076
MED28	0.2572	0.0491625	0.295	0.219	1	MED28	0.589728
IRF9	0.257378	0.182032	0.221	0.167	1	IRF9	0.589429
ENG	0.257445	0.0931475	0.211	0.149	1	ENG	0.589315
NMT1	0.257534	0.0374229	0.221	0.149	1	NMT1	0.589165
DR1	0.257844	0.0410806	0.4	0.298	1	DR1	0.588643
SPCS1	0.257846	0.0963467	0.821	0.702	1	SPCS1	0.588639
ZNHIT1	0.258005	0.0346462	0.463	0.36	1	ZNHIT1	0.588371
GOLGA8A	0.258058	-0.131537	0.095	0.14	1	GOLGA8A	0.588283
KDM5C	0.258135	0.0799424	0.116	0.07	1	KDM5C	0.588154
ANAPC11	0.258197	0.0794222	0.558	0.439	1	ANAPC11	0.588048
ZNRD1	0.258204	-0.159444	0.368	0.412	1	ZNRD1	0.588038
MGAT5	0.258217	-0.113756	0.063	0.105	1	MGAT5	0.588016
BPGM	0.258217	-0.162605	0.063	0.105	1	BPGM	0.588016
RAMP1	0.258217	-0.173589	0.063	0.105	1	RAMP1	0.588016
FLYWCH2	0.25822	0.10863	0.221	0.158	1	FLYWCH2	0.58801
AKAP9	0.258384	-0.175528	0.589	0.632	1	AKAP9	0.587734
ADAP1	0.258461	0.0882132	0.242	0.175	1	ADAP1	0.587605
ATG12	0.258546	0.0394966	0.368	0.281	1	ATG12	0.587462
PITPNB	0.258547	-0.143226	0.253	0.325	1	PITPNB	0.587461
FAM53C	0.258881	0.0721021	0.105	0.061	1	FAM53C	0.5869
FAM222B	0.258881	0.0531134	0.105	0.061	1	FAM222B	0.5869
RPL23	0.258923	-0.101668	0.821	0.816	1	RPL23	0.586829
SNRNP40	0.259165	0.164962	0.316	0.254	1	SNRNP40	0.586424
TNFRSF4	0.259171	0.297179	0.274	0.211	1	TNFRSF4	0.586414
STAT5A	0.259396	-0.0755429	0.095	0.149	1	STAT5A	0.586037
GNL1	0.259523	0.0812455	0.168	0.114	1	GNL1	0.585824
INTS6	0.259707	0.0858504	0.305	0.237	1	INTS6	0.585516
EIF2A	0.259707	-0.163318	0.242	0.289	1	EIF2A	0.585516
DRG1	0.260079	0.0686563	0.116	0.07	1	DRG1	0.584895
SDF2L1	0.260362	0.0838977	0.432	0.368	1	SDF2L1	0.584422
PUM3	0.260619	-0.0974352	0.137	0.193	1	PUM3	0.583995
BLVRB	0.26064	0.0885709	0.147	0.096	1	BLVRB	0.583959
HNRNPR	0.260707	0.0706915	0.611	0.526	1	HNRNPR	0.583848
LRRC2	0.260931	0.0800654	0.105	0.061	1	LRRC2	0.583475
APBA2	0.261141	0.126544	0.168	0.114	1	APBA2	0.583124
ABHD2	0.261141	0.112321	0.168	0.114	1	ABHD2	0.583124
ING2	0.261322	-0.153125	0.105	0.158	1	ING2	0.582824
NPHP3	0.261536	0.0877728	0.126	0.079	1	NPHP3	0.582468
COMMD3	0.261872	-0.145012	0.305	0.351	1	COMMD3	0.581911
RP9	0.262033	0.0821381	0.116	0.07	1	RP9	0.581644
HNRNPA1	0.262182	0.0786416	0.874	0.728	1	HNRNPA1	0.581397
ST6GALNAC4	0.262214	-0.135755	0.063	0.105	1	ST6GALNAC4	0.581345
CXorf40B	0.262472	-0.0564942	0.074	0.123	1	CXorf40B	0.580916
STK38	0.262514	-0.183424	0.158	0.211	1	STK38	0.580847
LPIN2	0.262617	0.0697508	0.453	0.386	1	LPIN2	0.580677
TTF1	0.262729	-0.164379	0.126	0.175	1	TTF1	0.580493
TYMS	0.262991	0.141756	0.105	0.061	1	TYMS	0.580059
RAB30	0.262991	0.0588951	0.105	0.061	1	RAB30	0.580059
TCFL5	0.262991	0.0481307	0.105	0.061	1	TCFL5	0.580059
ARL6IP4	0.263073	0.0935208	0.779	0.711	1	ARL6IP4	0.579923
TAOK1	0.263079	0.0513539	0.284	0.202	1	TAOK1	0.579913
CMC1	0.263122	0.0300336	0.653	0.544	1	CMC1	0.579843
PCID2	0.263205	-0.0863788	0.316	0.395	1	PCID2	0.579706
ALOX5AP	0.263301	0.094954	0.768	0.728	1	ALOX5AP	0.579547
EEF1AKMT2	0.263411	0.115383	0.126	0.079	1	EEF1AKMT2	0.579366
TTC37	0.263435	0.109532	0.189	0.132	1	TTC37	0.579327
GTPBP8	0.263624	0.107184	0.2	0.14	1	GTPBP8	0.579015
USP8	0.263836	0.108688	0.347	0.272	1	USP8	0.578666
SKI	0.26411	0.115389	0.147	0.096	1	SKI	0.578215
[truncated: 3,683 more rows]

## Sheet: S4C Bispecific vs. IgG
Table S4C: NK Cell Differential Expression Bispecific vs. IgG
	p_val	avg_logFC	pct.1	pct.2	p_val_adj	Gene_ID	logP
TERF1	5.41093e-06	0.559619	0.418	0.114	0.10929	TERF1	5.26673
NME1	1.06006e-05	0.605479	0.418	0.132	0.214111	NME1	4.97467
LDHA	1.40332e-05	0.519088	0.909	0.658	0.283443	LDHA	4.85284
RFC4	4.04112e-05	0.378821	0.255	0.044	0.816224	RFC4	4.3935
DOHH	0.000132421	0.348559	0.2	0.026	1	DOHH	3.87804
SRM	0.000188207	0.432577	0.618	0.307	1	SRM	3.72536
UIMC1	0.000193786	0.316244	0.273	0.061	1	UIMC1	3.71268
YJU2	0.000210124	0.276914	0.236	0.044	1	YJU2	3.67752
AXIN1	0.000228454	0.36961	0.327	0.096	1	AXIN1	3.6412
COA6	0.000279758	0.399781	0.382	0.14	1	COA6	3.55322
UBE2L3	0.000281787	0.396284	0.727	0.421	1	UBE2L3	3.55008
ZNF117	0.000330703	0.245981	0.164	0.018	1	ZNF117	3.48056
CKS2	0.000471455	0.446384	0.273	0.079	1	CKS2	3.32656
BTBD6	0.000475817	0.363225	0.436	0.175	1	BTBD6	3.32256
PSMB4	0.000600836	0.383324	0.655	0.342	1	PSMB4	3.22124
RPS27	0.000624518	-0.18552	1	1	1	RPS27	3.20445
CYB5A	0.000630684	0.3257	0.327	0.105	1	CYB5A	3.20019
PILRB	0.000666957	0.254488	0.473	0.184	1	PILRB	3.1759
NAXE	0.000675746	0.362271	0.382	0.149	1	NAXE	3.17022
XIST	0.000717272	0.283844	0.891	0.693	1	XIST	3.14432
ZSWIM7	0.000724291	0.291043	0.291	0.088	1	ZSWIM7	3.14009
MNAT1	0.00072979	0.350547	0.364	0.132	1	MNAT1	3.1368
MESP1	0.000778909	0.201611	0.127	0.009	1	MESP1	3.10851
AGTRAP	0.000911018	0.326635	0.236	0.061	1	AGTRAP	3.04047
CDK4	0.000924983	0.34394	0.309	0.105	1	CDK4	3.03387
PSME2	0.00100205	0.322225	0.891	0.693	1	PSME2	2.99911
PSMA7	0.00102372	0.290364	0.927	0.789	1	PSMA7	2.98982
P4HA1	0.00104563	0.215286	0.145	0.018	1	P4HA1	2.98062
BOLA3	0.00109019	0.300619	0.327	0.114	1	BOLA3	2.9625
TSR2	0.00116978	0.329161	0.418	0.184	1	TSR2	2.9319
ZNF775	0.00120825	0.164738	0.145	0.018	1	ZNF775	2.91784
TMED9	0.00121293	0.413639	0.545	0.289	1	TMED9	2.91616
HACD2	0.00124345	0.124679	0.145	0.018	1	HACD2	2.90537
PPP1R12C	0.00132051	0.229966	0.218	0.053	1	PPP1R12C	2.87926
DALRD3	0.00140957	0.230498	0.218	0.053	1	DALRD3	2.85091
LEPROTL1	0.00142785	-0.512114	0.382	0.614	1	LEPROTL1	2.84532
GCC2	0.0014454	-0.486526	0.473	0.649	1	GCC2	2.84001
FAAP20	0.00145709	0.407461	0.545	0.281	1	FAAP20	2.83651
FAM117A	0.00155278	0.209423	0.255	0.07	1	FAM117A	2.80889
NCK2	0.00159414	-0.463853	0.109	0.325	1	NCK2	2.79747
SDF2	0.00163183	0.356831	0.509	0.272	1	SDF2	2.78733
FOSL2	0.00185137	0.313232	0.255	0.079	1	FOSL2	2.73251
KPNB1	0.00187533	0.293736	0.545	0.281	1	KPNB1	2.72692
PSMD8	0.00189005	0.301755	0.8	0.535	1	PSMD8	2.72353
NUDT5	0.00190731	0.271919	0.509	0.254	1	NUDT5	2.71958
ST3GAL2	0.00192325	0.296925	0.255	0.079	1	ST3GAL2	2.71596
NACC1	0.00197167	0.285686	0.236	0.07	1	NACC1	2.70516
RABEP1	0.00202358	0.323537	0.345	0.14	1	RABEP1	2.69388
TMEM183A	0.00202675	0.301245	0.273	0.096	1	TMEM183A	2.6932
BORCS7	0.00204396	0.343798	0.327	0.132	1	BORCS7	2.68953
SPON2	0.0020638	0.338183	0.109	0.009	1	SPON2	2.68533
MVB12A	0.00212313	0.243577	0.273	0.088	1	MVB12A	2.67302
GEN1	0.00213218	0.137952	0.109	0.009	1	GEN1	2.67118
POLE	0.00220263	0.17948	0.109	0.009	1	POLE	2.65706
SMARCB1	0.00222602	0.334134	0.418	0.202	1	SMARCB1	2.65247
EMD	0.00224797	0.312406	0.309	0.114	1	EMD	2.64821
STK35	0.00227521	0.20175	0.109	0.009	1	STK35	2.64298
ACAD9	0.00242698	0.15414	0.109	0.009	1	ACAD9	2.61493
MAD2L1	0.00244506	0.296443	0.236	0.07	1	MAD2L1	2.61171
WDR76	0.00247163	0.372246	0.182	0.044	1	WDR76	2.60702
UAP1	0.00250629	0.16666	0.109	0.009	1	UAP1	2.60097
SLC7A5	0.00250629	0.12007	0.109	0.009	1	SLC7A5	2.60097
EIF4A2	0.00252984	-0.356549	0.836	0.886	1	EIF4A2	2.59691
QTRT1	0.00259834	0.283907	0.2	0.053	1	QTRT1	2.5853
RRP7A	0.00260514	0.375833	0.436	0.219	1	RRP7A	2.58417
MRPS14	0.00261723	0.270142	0.4	0.175	1	MRPS14	2.58216
WAS	0.00262707	0.341487	0.527	0.289	1	WAS	2.58053
GCN1	0.00264371	0.308455	0.182	0.044	1	GCN1	2.57779
PRKDC	0.00264476	0.423678	0.491	0.272	1	PRKDC	2.57761
VIM-AS1	0.00268207	-0.35637	0	0.149	1	VIM-AS1	2.57153
CXCR4	0.00269233	-0.562874	0.473	0.64	1	CXCR4	2.56987
MTOR	0.00270346	0.243817	0.182	0.044	1	MTOR	2.56808
PNKP	0.00273037	0.291141	0.491	0.246	1	PNKP	2.56378
RSL1D1	0.00274354	0.32553	0.6	0.36	1	RSL1D1	2.56169
RUVBL2	0.00282713	0.230974	0.2	0.053	1	RUVBL2	2.54865
TRIM52	0.00283742	-0.427181	0.055	0.237	1	TRIM52	2.54708
MTMR10	0.00288976	0.223932	0.127	0.018	1	MTMR10	2.53914
RAB11FIP4	0.00294613	0.243533	0.218	0.061	1	RAB11FIP4	2.53075
MSMO1	0.00301915	0.2949	0.255	0.088	1	MSMO1	2.52012
PIP4K2B	0.00305666	0.242475	0.127	0.018	1	PIP4K2B	2.51475
CENPW	0.00305666	0.181991	0.127	0.018	1	CENPW	2.51475
GTPBP1	0.0030934	0.235414	0.145	0.026	1	GTPBP1	2.50956
STARD3NL	0.00311785	0.340507	0.527	0.289	1	STARD3NL	2.50614
COPS7A	0.0031272	0.236279	0.218	0.061	1	COPS7A	2.50484
RPL10	0.0031333	-0.180273	1	1	1	RPL10	2.504
LAMTOR2	0.00316973	0.317144	0.491	0.272	1	LAMTOR2	2.49898
NDUFB6	0.00316973	0.231725	0.527	0.254	1	NDUFB6	2.49898
SLC26A2	0.00331836	0.229888	0.218	0.061	1	SLC26A2	2.47908
ATP7A	0.00332354	0.202975	0.127	0.018	1	ATP7A	2.4784
PHKA2	0.00332354	0.157024	0.127	0.018	1	PHKA2	2.4784
SNRNP40	0.00333196	0.307413	0.491	0.254	1	SNRNP40	2.4773
TUT7	0.00335576	-0.442081	0.091	0.281	1	TUT7	2.47421
FEN1	0.00336122	0.332451	0.255	0.088	1	FEN1	2.4735
CFL1	0.00336131	0.215266	0.964	0.965	1	CFL1	2.47349
CDT1	0.00337255	0.182161	0.182	0.044	1	CDT1	2.47204
OTUD6B	0.00342345	0.231227	0.145	0.026	1	OTUD6B	2.46554
CENPN	0.00342345	0.160544	0.145	0.026	1	CENPN	2.46554
IFI44	0.00344714	0.252346	0.182	0.044	1	IFI44	2.46254
RTP4	0.00345976	0.323803	0.236	0.079	1	RTP4	2.46095
TRAF3IP1	0.00346727	0.232416	0.164	0.035	1	TRAF3IP1	2.46001
ACTR6	0.00348322	0.250579	0.364	0.149	1	ACTR6	2.45802
RFX7	0.00351082	0.245648	0.145	0.026	1	RFX7	2.45459
RIOX2	0.00351082	0.22333	0.145	0.026	1	RIOX2	2.45459
ZNF236	0.00351082	0.179389	0.145	0.026	1	ZNF236	2.45459
RFXAP	0.00352324	0.152594	0.182	0.044	1	RFXAP	2.45306
TXLNA	0.00352407	0.279932	0.236	0.079	1	TXLNA	2.45296
UCHL5	0.00357627	0.231098	0.382	0.167	1	UCHL5	2.44657
FANCI	0.00360022	0.238618	0.145	0.026	1	FANCI	2.44367
ZNF714	0.00360022	0.22499	0.145	0.026	1	ZNF714	2.44367
SNRPE	0.00361602	0.344753	0.564	0.316	1	SNRPE	2.44177
TUBB	0.00361853	0.497224	0.691	0.509	1	TUBB	2.44147
LCP1	0.00362638	0.244753	0.945	0.781	1	LCP1	2.44053
SMARCAL1	0.00363248	0.236933	0.164	0.035	1	SMARCAL1	2.4398
HIRIP3	0.00367284	0.265487	0.255	0.088	1	HIRIP3	2.435
TAF3	0.00367995	0.278551	0.327	0.132	1	TAF3	2.43416
TAP1	0.00368835	0.370933	0.564	0.325	1	TAP1	2.43317
GZMB	0.00370387	1.00102	0.618	0.43	1	GZMB	2.43134
COG5	0.00371774	0.140572	0.164	0.035	1	COG5	2.42972
PFDN4	0.00375216	0.291289	0.4	0.184	1	PFDN4	2.42572
OAS1	0.00400556	0.379877	0.236	0.079	1	OAS1	2.39734
POP4	0.0040606	0.232341	0.291	0.105	1	POP4	2.39141
CHD1L	0.00407728	0.113583	0.164	0.035	1	CHD1L	2.38963
HSPA13	0.00407904	0.16549	0.145	0.026	1	HSPA13	2.38944
YEATS4	0.00411383	0.211769	0.218	0.061	1	YEATS4	2.38575
PDRG1	0.00419583	0.218914	0.291	0.105	1	PDRG1	2.37718
PTPN6	0.00446702	0.386336	0.564	0.333	1	PTPN6	2.34998
ARPC2	0.00448364	0.176097	1	0.965	1	ARPC2	2.34837
FBXL5	0.00453761	-0.382551	0.018	0.167	1	FBXL5	2.34317
PSMD14	0.00462694	0.230472	0.436	0.211	1	PSMD14	2.33471
PRPF38B	0.00463013	-0.379684	0.473	0.658	1	PRPF38B	2.33441
TESK1	0.0047247	0.157745	0.2	0.053	1	TESK1	2.32563
TUBA1B	0.00476066	0.767946	0.745	0.623	1	TUBA1B	2.32233
CHST12	0.00481152	0.289811	0.673	0.377	1	CHST12	2.31772
TEN1	0.00504404	0.275279	0.182	0.053	1	TEN1	2.29722
RPS15	0.00505732	-0.178613	1	1	1	RPS15	2.29608
ATP6V1E1	0.00514385	0.204551	0.364	0.158	1	ATP6V1E1	2.28871
RNF6	0.00516948	0.261255	0.218	0.07	1	RNF6	2.28655
H2AFY	0.00525791	0.321068	0.527	0.289	1	H2AFY	2.27919
LUC7L	0.00526597	-0.323581	0.018	0.167	1	LUC7L	2.27852
ASCC2	0.00528899	0.232382	0.255	0.088	1	ASCC2	2.27663
TEFM	0.00534422	0.263046	0.273	0.105	1	TEFM	2.27212
ATP5PO	0.0054067	0.268104	0.727	0.482	1	ATP5PO	2.26707
MRPL43	0.00549978	0.308957	0.418	0.211	1	MRPL43	2.25965
TMEM106C	0.00568404	0.366126	0.255	0.096	1	TMEM106C	2.24534
PARK7	0.00570805	0.236589	0.873	0.781	1	PARK7	2.24351
PNP	0.00571909	-0.352756	0.127	0.325	1	PNP	2.24267
PRDX4	0.00572175	0.258106	0.291	0.114	1	PRDX4	2.24247
MED24	0.0058295	0.190454	0.236	0.079	1	MED24	2.23437
GOT1	0.00617861	0.301192	0.182	0.053	1	GOT1	2.20911
HSCB	0.00617861	0.264946	0.182	0.053	1	HSCB	2.20911
ZNF276	0.00621083	0.364998	0.309	0.132	1	ZNF276	2.20685
SLAMF7	0.00625229	0.3648	0.527	0.307	1	SLAMF7	2.20396
ARL2	0.0062623	0.282155	0.418	0.211	1	ARL2	2.20327
SH3BP5	0.00626452	-0.384249	0.036	0.193	1	SH3BP5	2.20311
PHB	0.00637447	0.268172	0.545	0.307	1	PHB	2.19556
PPP1R7	0.00640481	0.296746	0.655	0.395	1	PPP1R7	2.19349
MMP25-AS1	0.00662813	-0.409098	0.291	0.482	1	MMP25-AS1	2.17861
SMG6	0.00666919	0.296629	0.364	0.175	1	SMG6	2.17593
CALR	0.00676049	0.434653	0.782	0.57	1	CALR	2.17002
RPL30	0.00708899	-0.164483	1	1	1	RPL30	2.14942
SF3B5	0.00718807	0.259544	0.764	0.544	1	SF3B5	2.14339
ZNF281	0.00722273	0.29814	0.327	0.149	1	ZNF281	2.1413
LAGE3	0.00726787	0.332285	0.418	0.219	1	LAGE3	2.13859
IL27RA	0.0073525	0.389938	0.527	0.342	1	IL27RA	2.13357
EXOC5	0.00739435	0.232075	0.255	0.096	1	EXOC5	2.1311
DCPS	0.00739435	0.2279	0.255	0.096	1	DCPS	2.1311
CYCS	0.00746291	0.233761	0.636	0.377	1	CYCS	2.12709
HSP90AB1	0.00746426	0.48949	0.855	0.754	1	HSP90AB1	2.12701
ACTB	0.0076044	0.218459	1	1	1	ACTB	2.11893
TFAP4	0.00764922	0.189856	0.109	0.018	1	TFAP4	2.11638
DHRS7B	0.00770595	0.135975	0.218	0.07	1	DHRS7B	2.11317
SF3A2	0.00774907	0.251999	0.309	0.132	1	SF3A2	2.11075
CD160	0.00777378	0.679568	0.236	0.096	1	CD160	2.10937
RSAD2	0.00785931	0.215513	0.109	0.018	1	RSAD2	2.10462
CIC	0.00789007	0.219229	0.164	0.044	1	CIC	2.10292
RBM38	0.00798974	-0.556606	0.127	0.298	1	RBM38	2.09747
AIMP2	0.00799521	0.210567	0.182	0.053	1	AIMP2	2.09717
RNF139	0.00799521	0.200086	0.182	0.053	1	RNF139	2.09717
GBF1	0.00805588	0.210959	0.164	0.044	1	GBF1	2.09389
FAM20B	0.00807455	0.179715	0.109	0.018	1	FAM20B	2.09288
RPS23	0.00819364	-0.151542	1	1	1	RPS23	2.08652
PECR	0.00822479	0.208326	0.164	0.044	1	PECR	2.08487
ALDH16A1	0.00822479	0.196436	0.164	0.044	1	ALDH16A1	2.08487
MLLT1	0.00829506	0.196076	0.109	0.018	1	MLLT1	2.08118
NEAT1	0.00831738	-0.289016	0.782	0.851	1	NEAT1	2.08001
DERA	0.00833425	0.199673	0.273	0.105	1	DERA	2.07913
DENND6A	0.00835421	-0.314664	0.036	0.184	1	DENND6A	2.07809
PLEKHF2	0.00835432	0.233628	0.236	0.088	1	PLEKHF2	2.07809
FAM49A	0.00839687	0.293506	0.164	0.044	1	FAM49A	2.07588
PIGT	0.00848374	0.30078	0.291	0.123	1	PIGT	2.07141
ASPM	0.00852094	0.602112	0.109	0.018	1	ASPM	2.06951
UHRF1	0.00852094	0.223673	0.109	0.018	1	UHRF1	2.06951
POLD2	0.00856417	0.250459	0.218	0.079	1	POLD2	2.06731
CBR1	0.0086699	0.267109	0.327	0.149	1	CBR1	2.06199
USP25	0.008702	0.301733	0.309	0.132	1	USP25	2.06038
CENPU	0.00875072	0.148188	0.164	0.044	1	CENPU	2.05796
CCNB1	0.0087523	0.302745	0.109	0.018	1	CCNB1	2.05788
FNDC3B	0.00875332	0.239611	0.127	0.026	1	FNDC3B	2.05783
GIMAP5	0.00882455	0.247396	0.255	0.096	1	GIMAP5	2.05431
PRKAG1	0.0088282	0.2262	0.309	0.132	1	PRKAG1	2.05413
CRELD2	0.00887335	0.399726	0.4	0.219	1	CRELD2	2.05191
SDCBP	0.00891832	0.305098	0.545	0.342	1	SDCBP	2.04972
SAYSD1	0.00893259	0.229081	0.164	0.044	1	SAYSD1	2.04902
ECSIT	0.00893259	0.174704	0.164	0.044	1	ECSIT	2.04902
ZNF35	0.00896631	0.210211	0.127	0.026	1	ZNF35	2.04739
GPR89B	0.00898926	0.191011	0.109	0.018	1	GPR89B	2.04628
ST8SIA6	0.00898926	0.182355	0.109	0.018	1	ST8SIA6	2.04628
C3orf58	0.00898926	0.178503	0.109	0.018	1	C3orf58	2.04628
TUBB2A	0.00898926	0.155061	0.109	0.018	1	TUBB2A	2.04628
LAP3	0.00901524	0.31809	0.345	0.175	1	LAP3	2.04502
CIB1	0.0090166	0.303237	0.782	0.632	1	CIB1	2.04496
CENPM	0.00902509	0.288966	0.145	0.035	1	CENPM	2.04455
ALKBH2	0.00902509	0.193181	0.145	0.035	1	ALKBH2	2.04455
CHD7	0.00918392	0.197575	0.127	0.026	1	CHD7	2.03697
TOR1B	0.00918392	0.183529	0.127	0.026	1	TOR1B	2.03697
CTPS1	0.00922593	0.177492	0.145	0.035	1	CTPS1	2.03499
SMIM19	0.00923256	0.160997	0.527	0.281	1	SMIM19	2.03468
ELP5	0.00923264	0.144746	0.345	0.149	1	ELP5	2.03467
SLF2	0.00926927	0.224777	0.291	0.123	1	SLF2	2.03295
MCMBP	0.0093769	0.2004	0.236	0.088	1	MCMBP	2.02794
CD81	0.00943706	0.22582	0.964	0.842	1	CD81	2.02516
APOBEC3C	0.00958894	0.233513	0.691	0.491	1	APOBEC3C	2.01823
CISD1	0.00959643	0.153502	0.382	0.175	1	CISD1	2.01789
GZMH	0.00968889	0.260226	0.236	0.088	1	GZMH	2.01373
PMPCA	0.00970467	0.214718	0.255	0.096	1	PMPCA	2.01302
EFHD2	0.009738	0.393607	0.764	0.614	1	EFHD2	2.01153
APBA2	0.00978819	0.26423	0.273	0.114	1	APBA2	2.0093
FBXL4	0.00985261	0.144413	0.145	0.035	1	FBXL4	2.00645
TP53BP2	0.00989128	0.15931	0.182	0.053	1	TP53BP2	2.00475
SNTB1	0.00999541	0.12394	0.109	0.018	1	SNTB1	2.0002
EXOSC8	0.0101287	0.231154	0.345	0.158	1	EXOSC8	1.99445
ATP23	0.0103442	0.160794	0.127	0.026	1	ATP23	1.9853
BTG1	0.0103626	-0.30728	0.945	0.982	1	BTG1	1.98453
MFN2	0.0105351	0.124213	0.109	0.018	1	MFN2	1.97736
RCAN1	0.0106312	0.146953	0.145	0.035	1	RCAN1	1.97342
DNAJB2	0.0106811	0.212278	0.236	0.088	1	DNAJB2	1.97138
METRN	0.0107149	0.282213	0.255	0.105	1	METRN	1.97001
WDR37	0.0107471	0.160328	0.145	0.035	1	WDR37	1.96871
RPL3	0.0108231	-0.148593	1	1	1	RPL3	1.96565
LDLR	0.0108437	0.170339	0.127	0.026	1	LDLR	1.96482
EED	0.010855	0.160761	0.236	0.088	1	EED	1.96437
NCL	0.0109931	0.266572	0.891	0.825	1	NCL	1.95888
SNRPC	0.0110914	0.249716	0.545	0.342	1	SNRPC	1.95501
SGMS1	0.0111675	0.148341	0.164	0.044	1	SGMS1	1.95204
LARP7	0.0112897	0.229226	0.582	0.342	1	LARP7	1.94732
KRI1	0.0113598	0.196526	0.291	0.123	1	KRI1	1.94463
PSMB8	0.0114483	0.229125	0.8	0.702	1	PSMB8	1.94126
RPS27A	0.0115741	-0.154247	1	1	1	RPS27A	1.93651
ATP6V0E1	0.0115937	0.244064	0.909	0.772	1	ATP6V0E1	1.93578
CPD	0.0116234	0.118901	0.164	0.044	1	CPD	1.93466
AC025164.1	0.0116379	-0.344791	0.091	0.263	1	AC025164.1	1.93413
POP7	0.0118588	0.173163	0.291	0.123	1	POP7	1.92596
ABI3	0.0119065	0.161816	0.4	0.202	1	ABI3	1.92422
JAML	0.0119277	-0.473013	0.109	0.263	1	JAML	1.92344
TMSB10	0.0120237	0.150402	1	1	1	TMSB10	1.91996
ZNF398	0.0121875	0.147656	0.127	0.026	1	ZNF398	1.91409
RABL6	0.012201	0.198155	0.4	0.202	1	RABL6	1.91361
MIF	0.0123545	0.330187	0.564	0.342	1	MIF	1.90817
RPS28	0.0123709	-0.173128	1	0.991	1	RPS28	1.9076
UTP11	0.012374	0.193721	0.364	0.175	1	UTP11	1.90749
CHEK1	0.0123983	0.261926	0.182	0.061	1	CHEK1	1.90664
MTPAP	0.0125113	-0.304069	0.018	0.14	1	MTPAP	1.9027
CCDC107	0.0125609	0.386424	0.491	0.298	1	CCDC107	1.90098
SNRPF	0.0126118	0.216957	0.582	0.351	1	SNRPF	1.89922
AMD1	0.0126119	0.183121	0.364	0.175	1	AMD1	1.89922
GMNN	0.0126251	0.235763	0.182	0.061	1	GMNN	1.89876
YWHAE	0.0126301	0.294928	0.509	0.289	1	YWHAE	1.89859
PSMB9	0.012742	0.209077	0.909	0.789	1	PSMB9	1.89476
PTPRE	0.0127652	-0.397233	0.109	0.272	1	PTPRE	1.89397
GHITM	0.0128624	0.202784	0.709	0.447	1	GHITM	1.89068
ACAT2	0.0129148	0.326213	0.291	0.14	1	ACAT2	1.88891
ITGB1	0.012984	-0.317596	0.545	0.658	1	ITGB1	1.88659
NDUFB2	0.0130003	0.296884	0.782	0.579	1	NDUFB2	1.88605
LIMD2	0.0130277	-0.269003	0.855	0.904	1	LIMD2	1.88513
TMEM147-AS1	0.0130282	-0.227825	0	0.105	1	TMEM147-AS1	1.88511
EMC3	0.0131511	0.286027	0.345	0.175	1	EMC3	1.88104
NOC2L	0.0132572	0.225328	0.327	0.158	1	NOC2L	1.87755
RAD9A	0.0132587	0.209551	0.218	0.079	1	RAD9A	1.8775
SWI5	0.0133278	0.324165	0.182	0.061	1	SWI5	1.87524
MPDU1	0.0133689	0.203417	0.236	0.096	1	MPDU1	1.8739
VTI1B	0.0134434	0.226104	0.364	0.184	1	VTI1B	1.87149
WTAP	0.0135092	-0.407699	0.273	0.447	1	WTAP	1.86937
GPATCH4	0.0135408	0.278034	0.273	0.114	1	GPATCH4	1.86836
TYMS	0.0135696	0.581211	0.182	0.061	1	TYMS	1.86743
ZBTB14	0.0135696	0.2348	0.182	0.061	1	ZBTB14	1.86743
CMTM6	0.0135929	0.177634	0.655	0.404	1	CMTM6	1.86669
LMBR1L	0.0136496	-0.31337	0.055	0.202	1	LMBR1L	1.86488
TAP2	0.0136653	0.227571	0.291	0.123	1	TAP2	1.86438
NUBP1	0.0137	0.187758	0.218	0.079	1	NUBP1	1.86328
UQCC2	0.0137618	0.280593	0.382	0.202	1	UQCC2	1.86132
NDUFA1	0.0137844	0.328439	0.655	0.482	1	NDUFA1	1.86061
RPS14	0.0138504	-0.126379	1	1	1	RPS14	1.85854
DLST	0.0139385	0.242674	0.164	0.053	1	DLST	1.85578
RPL7A	0.0139805	-0.158258	1	1	1	RPL7A	1.85448
CSNK2B	0.0140196	0.261654	0.582	0.368	1	CSNK2B	1.85327
MRPS18B	0.0140237	0.359157	0.418	0.254	1	MRPS18B	1.85314
GINM1	0.014056	0.28461	0.291	0.132	1	GINM1	1.85214
PCNX2	0.0141633	-0.240006	0.036	0.175	1	PCNX2	1.84883
B3GAT3	0.0142138	0.262222	0.418	0.228	1	B3GAT3	1.84729
CIRBP	0.014224	-0.336783	0.618	0.684	1	CIRBP	1.84698
TFIP11	0.0143184	0.243075	0.182	0.061	1	TFIP11	1.8441
TMEM238	0.0144496	0.229751	0.291	0.132	1	TMEM238	1.84014
CSNK1D	0.0145116	0.252268	0.436	0.246	1	CSNK1D	1.83828
TMEM248	0.0145283	0.230504	0.418	0.219	1	TMEM248	1.83778
CENPK	0.0148192	0.367302	0.236	0.105	1	CENPK	1.82917
OAT	0.0150307	0.29062	0.164	0.053	1	OAT	1.82302
STAM2	0.0151029	-0.3111	0.036	0.167	1	STAM2	1.82094
DDX23	0.0154972	0.236382	0.327	0.158	1	DDX23	1.80975
RNF166	0.0155969	-0.373746	0.236	0.412	1	RNF166	1.80696
RBM39	0.015685	-0.335232	0.727	0.798	1	RBM39	1.80452
RNPEP	0.0158987	0.141788	0.164	0.053	1	RNPEP	1.79864
SUCO	0.01597	-0.323028	0.055	0.193	1	SUCO	1.7967
EEF1E1	0.0160425	0.238319	0.309	0.149	1	EEF1E1	1.79473
MX1	0.0160826	0.187468	0.273	0.114	1	MX1	1.79364
BRD1	0.0163003	-0.43678	0.109	0.254	1	BRD1	1.7878
KPNA2	0.0164462	0.399669	0.255	0.114	1	KPNA2	1.78393
WASF2	0.0165695	0.249855	0.618	0.395	1	WASF2	1.78069
SASH3	0.016573	0.191214	0.455	0.263	1	SASH3	1.7806
PPIL4	0.0167112	0.192703	0.273	0.123	1	PPIL4	1.77699
FH	0.016788	0.169127	0.182	0.061	1	FH	1.775
NOP14	0.0169247	0.239811	0.255	0.114	1	NOP14	1.77148
NKG7	0.0169725	0.29587	1	0.982	1	NKG7	1.77025
AKIRIN1	0.0171166	0.235052	0.345	0.175	1	AKIRIN1	1.76658
TPT1	0.017128	-0.15807	1	1	1	TPT1	1.76629
TPP1	0.0171696	0.27861	0.327	0.158	1	TPP1	1.76524
CATSPER1	0.0173215	0.196179	0.236	0.096	1	CATSPER1	1.76141
ZNF544	0.0174262	-0.319507	0.036	0.158	1	ZNF544	1.7588
NUDT3	0.0174435	0.148014	0.164	0.053	1	NUDT3	1.75837
SHLD2	0.0174632	0.163708	0.2	0.07	1	SHLD2	1.75788
YBX1	0.0175786	0.30212	0.836	0.772	1	YBX1	1.75502
NCAPH2	0.0177111	0.282327	0.2	0.079	1	NCAPH2	1.75175
CHCHD2	0.0177611	0.26978	0.964	0.807	1	CHCHD2	1.75053
ZWINT	0.0177678	0.311286	0.164	0.053	1	ZWINT	1.75037
TPM3	0.0178223	0.250834	0.873	0.772	1	TPM3	1.74904
LINC00861	0.0178837	-0.428599	0.182	0.333	1	LINC00861	1.74754
TOP2A	0.0182676	0.676	0.145	0.044	1	TOP2A	1.73832
MAP4K5	0.0183155	0.218062	0.182	0.061	1	MAP4K5	1.73718
GOLGA8B	0.0184176	-0.358814	0.109	0.254	1	GOLGA8B	1.73477
CCDC88B	0.0184272	0.230958	0.345	0.175	1	CCDC88B	1.73454
CLSPN	0.0184323	0.285169	0.164	0.053	1	CLSPN	1.73442
ZDHHC5	0.0186642	0.1602	0.236	0.096	1	ZDHHC5	1.72899
MRE11	0.0187717	0.126181	0.273	0.114	1	MRE11	1.7265
SEPHS1	0.0187726	0.148095	0.164	0.053	1	SEPHS1	1.72648
SCCPDH	0.0187832	0.215364	0.218	0.088	1	SCCPDH	1.72623
PMPCB	0.0188266	-0.35891	0.091	0.228	1	PMPCB	1.72523
LY6E	0.0188295	0.362785	0.745	0.605	1	LY6E	1.72516
IDH2	0.0188418	0.352725	0.418	0.246	1	IDH2	1.72488
TMEM9B	0.018901	0.191468	0.455	0.246	1	TMEM9B	1.72351
PQLC3	0.0189632	0.243586	0.255	0.114	1	PQLC3	1.72209
AC090152.1	0.0190606	0.116067	0.309	0.14	1	AC090152.1	1.71986
HSPD1	0.0190919	0.371947	0.509	0.351	1	HSPD1	1.71915
CLEC2B	0.0191514	0.204683	0.927	0.851	1	CLEC2B	1.7178
HAUS6	0.0192262	0.120239	0.236	0.096	1	HAUS6	1.71611
GALK1	0.0193702	0.246336	0.218	0.088	1	GALK1	1.71287
WDR5	0.0194698	0.110761	0.164	0.053	1	WDR5	1.71064
TNFRSF25	0.0195052	0.207982	0.255	0.114	1	TNFRSF25	1.70985
RPL9	0.0196156	-0.164721	0.964	1	1	RPL9	1.7074
COPS5	0.0197238	0.27954	0.436	0.272	1	COPS5	1.70501
FAM129A	0.0197268	-0.298252	0.109	0.263	1	FAM129A	1.70494
KLHDC4	0.0197812	0.26144	0.255	0.114	1	KLHDC4	1.70375
IL9R	0.0198267	0.109929	0.164	0.053	1	IL9R	1.70275
TMOD3	0.0198369	0.188621	0.545	0.307	1	TMOD3	1.70253
RPL35A	0.0200594	-0.162758	0.964	0.991	1	RPL35A	1.69768
AFTPH	0.0200607	-0.38283	0.073	0.202	1	AFTPH	1.69765
EIF2D	0.0201341	0.177859	0.145	0.044	1	EIF2D	1.69607
STX4	0.0201926	0.237996	0.418	0.237	1	STX4	1.69481
ARPC1A	0.0201968	0.241688	0.236	0.105	1	ARPC1A	1.69472
DDX39A	0.0202608	0.330613	0.436	0.272	1	DDX39A	1.69334
RHEB	0.0202972	0.1712	0.509	0.298	1	RHEB	1.69256
RALY	0.0202973	0.262682	0.509	0.298	1	RALY	1.69256
GDI1	0.020308	0.0643124	0.182	0.061	1	GDI1	1.69233
IFI27L1	0.0204073	0.16762	0.127	0.035	1	IFI27L1	1.69021
CIAPIN1	0.0204618	0.236329	0.2	0.079	1	CIAPIN1	1.68906
CCDC142	0.0205268	0.191946	0.145	0.044	1	CCDC142	1.68768
URM1	0.0206419	0.24679	0.309	0.158	1	URM1	1.68525
AC007952.4	0.0208369	0.178438	0.127	0.035	1	AC007952.4	1.68117
RBBP8	0.0208369	0.109115	0.127	0.035	1	RBBP8	1.68117
BLMH	0.0209082	0.144511	0.218	0.088	1	BLMH	1.67968
CAMK1	0.0209261	0.192193	0.145	0.044	1	CAMK1	1.67931
SLC25A1	0.0210721	0.155509	0.291	0.132	1	SLC25A1	1.67629
CCAR1	0.0210913	0.259446	0.364	0.202	1	CCAR1	1.6759
SBNO2	0.0211213	0.277155	0.2	0.079	1	SBNO2	1.67528
TRIP4	0.0212282	0.183809	0.218	0.088	1	TRIP4	1.67309
GPS1	0.0212282	0.180048	0.218	0.088	1	GPS1	1.67309
DDX28	0.0213124	0.123553	0.164	0.053	1	DDX28	1.67137
BLM	0.0213322	0.177713	0.145	0.044	1	BLM	1.67097
SMC5	0.0215937	0.216434	0.364	0.193	1	SMC5	1.66567
MAP7D3	0.0216414	0.323295	0.182	0.07	1	MAP7D3	1.66471
SYVN1	0.0216987	0.110978	0.164	0.053	1	SYVN1	1.66357
GINS2	0.0217451	0.199481	0.145	0.044	1	GINS2	1.66264
TWISTNB	0.0217809	0.228216	0.345	0.184	1	TWISTNB	1.66192
HSPB11	0.0218465	0.249256	0.491	0.298	1	HSPB11	1.66062
MED16	0.0218812	0.165698	0.218	0.088	1	MED16	1.65993
FDFT1	0.0219723	0.223532	0.327	0.167	1	FDFT1	1.65812
ARPC5L	0.0220824	0.30234	0.764	0.544	1	ARPC5L	1.65595
ZNF605	0.0221649	0.177096	0.145	0.044	1	ZNF605	1.65433
USP37	0.0221649	0.0820943	0.145	0.044	1	USP37	1.65433
XPO1	0.0222168	0.301339	0.345	0.193	1	XPO1	1.65332
CDC45	0.0223081	0.149555	0.109	0.026	1	CDC45	1.65154
USP15	0.0224099	0.273324	0.545	0.377	1	USP15	1.64956
PPHLN1	0.0225509	-0.37556	0.255	0.386	1	PPHLN1	1.64684
STOML2	0.0226192	0.263206	0.382	0.211	1	STOML2	1.64552
TPX2	0.022635	0.291432	0.127	0.035	1	TPX2	1.64522
CLASRP	0.0227383	0.239816	0.182	0.07	1	CLASRP	1.64324
ANP32B	0.0229125	0.262762	0.745	0.544	1	ANP32B	1.63993
RBBP6	0.0230898	-0.319612	0.2	0.36	1	RBBP6	1.63658
MFHAS1	0.0231051	0.172762	0.127	0.035	1	MFHAS1	1.63629
DHX32	0.0231051	0.142122	0.127	0.035	1	DHX32	1.63629
KLHL21	0.0231051	0.140725	0.127	0.035	1	KLHL21	1.63629
RPS3	0.0232155	-0.139461	1	1	1	RPS3	1.63422
MAGOH	0.0232278	0.260631	0.564	0.386	1	MAGOH	1.63399
PCED1A	0.0234671	0.117219	0.145	0.044	1	PCED1A	1.62954
EDEM1	0.0234743	0.185044	0.236	0.105	1	EDEM1	1.62941
IL18RAP	0.0234985	0.242134	0.291	0.14	1	IL18RAP	1.62896
UBQLN2	0.0235911	-0.217403	0.055	0.184	1	UBQLN2	1.62725
CHCHD1	0.0236457	0.208703	0.527	0.351	1	CHCHD1	1.62625
MT2A	0.0238068	0.359917	0.6	0.412	1	MT2A	1.6233
SMG7	0.0238615	0.239831	0.255	0.123	1	SMG7	1.6223
NRM	0.0238702	0.266988	0.109	0.026	1	NRM	1.62214
GTSE1	0.0238702	0.213138	0.109	0.026	1	GTSE1	1.62214
FAM193B	0.0238702	0.159817	0.109	0.026	1	FAM193B	1.62214
FAM110A	0.0240192	0.190349	0.255	0.114	1	FAM110A	1.61944
PROSER1	0.0240707	0.135036	0.127	0.035	1	PROSER1	1.61851
CDK19	0.0241464	-0.238629	0.018	0.123	1	CDK19	1.61715
NT5C3A	0.0241735	0.194919	0.273	0.132	1	NT5C3A	1.61666
SERF2	0.0242525	0.155355	0.982	0.974	1	SERF2	1.61524
NUCKS1	0.0243366	0.338052	0.655	0.526	1	NUCKS1	1.61374
MT-ND5	0.0243592	0.150417	1	0.982	1	MT-ND5	1.61334
POLR2M	0.0243716	0.173293	0.145	0.044	1	POLR2M	1.61312
GEMIN5	0.0244116	0.1692	0.109	0.026	1	GEMIN5	1.6124
WRB	0.0244116	0.169112	0.109	0.026	1	WRB	1.6124
ERCC3	0.0245665	0.17747	0.127	0.035	1	ERCC3	1.60966
NUTM2B-AS1	0.0246214	0.34577	0.473	0.289	1	NUTM2B-AS1	1.60869
DDX21	0.0246991	0.247025	0.455	0.272	1	DDX21	1.60732
PPP2R2A	0.0247982	0.28416	0.4	0.237	1	PPP2R2A	1.60558
CAMKK2	0.0249636	0.120783	0.109	0.026	1	CAMKK2	1.60269
CD44	0.0249989	-0.30792	0.745	0.746	1	CD44	1.60208
FAM50B	0.0250712	0.158762	0.127	0.035	1	FAM50B	1.60083
NUDT8	0.0250712	0.14358	0.127	0.035	1	NUDT8	1.60083
EIF4A1	0.0251295	0.275062	0.473	0.289	1	EIF4A1	1.59982
HELLS	0.0253452	0.315496	0.164	0.061	1	HELLS	1.5961
NECAP1	0.0253662	-0.347567	0.073	0.202	1	NECAP1	1.59574
CAPN7	0.025481	0.14403	0.2	0.079	1	CAPN7	1.59378
BARD1	0.025487	0.175846	0.182	0.07	1	BARD1	1.59368
CPSF6	0.025488	0.184227	0.309	0.158	1	CPSF6	1.59367
ZNF33B	0.0255465	-0.271143	0.036	0.149	1	ZNF33B	1.59267
ORC6	0.0255847	0.143344	0.127	0.035	1	ORC6	1.59202
RPL28	0.0256625	-0.107829	1	0.991	1	RPL28	1.5907
PHF3	0.0258316	-0.354596	0.273	0.421	1	PHF3	1.58785
CNPPD1	0.0258771	0.145351	0.2	0.079	1	CNPPD1	1.58708
CHMP6	0.0259723	-0.239891	0.127	0.289	1	CHMP6	1.58549
PRF1	0.0260713	0.413771	0.764	0.623	1	PRF1	1.58384
STAG3	0.0261001	0.230285	0.109	0.026	1	STAG3	1.58336
MYO18A	0.0261001	0.1302	0.109	0.026	1	MYO18A	1.58336
FOXRED1	0.0261001	0.114454	0.109	0.026	1	FOXRED1	1.58336
DDX5	0.0261049	-0.224619	0.945	0.965	1	DDX5	1.58328
B3GALNT2	0.0261074	0.0847503	0.127	0.035	1	B3GALNT2	1.58324
LSM3	0.0261537	0.248626	0.618	0.404	1	LSM3	1.58247
OLA1	0.0263177	0.104354	0.4	0.211	1	OLA1	1.57975
TXNDC15	0.0263857	0.241744	0.255	0.123	1	TXNDC15	1.57863
SUPT4H1	0.0264585	-0.38259	0.164	0.316	1	SUPT4H1	1.57743
ISY1	0.0265997	-0.283116	0.109	0.254	1	ISY1	1.57512
UBR7	0.0266722	0.24526	0.164	0.061	1	UBR7	1.57394
DCAF11	0.0266815	0.235221	0.291	0.14	1	DCAF11	1.57379
ATAD2B	0.0266815	0.225567	0.291	0.14	1	ATAD2B	1.57379
USPL1	0.0266849	0.129274	0.109	0.026	1	USPL1	1.57373
KATNAL1	0.0271804	0.12976	0.127	0.035	1	KATNAL1	1.56574
PRKAR1B	0.027281	0.148773	0.109	0.026	1	PRKAR1B	1.56414
USP20	0.027281	0.145983	0.109	0.026	1	USP20	1.56414
TK1	0.027281	0.134044	0.109	0.026	1	TK1	1.56414
DCXR	0.0273509	0.216491	0.382	0.211	1	DCXR	1.56303
CISD3	0.0278346	0.231885	0.345	0.184	1	CISD3	1.55541
SPAG1	0.0278885	0.163026	0.109	0.026	1	SPAG1	1.55457
CAD	0.0278885	0.0945257	0.109	0.026	1	CAD	1.55457
ARF3	0.0279928	0.0734339	0.236	0.096	1	ARF3	1.55295
PLEKHO2	0.0280675	0.191339	0.182	0.07	1	PLEKHO2	1.5518
CD151	0.028242	0.18431	0.273	0.132	1	CD151	1.5491
SP110	0.0282843	0.203383	0.6	0.395	1	SP110	1.54845
LAG3	0.0282913	0.131905	0.127	0.035	1	LAG3	1.54835
POLRMT	0.0282913	0.114256	0.127	0.035	1	POLRMT	1.54835
TNIK	0.0283596	0.18214	0.236	0.105	1	TNIK	1.5473
GNAI2	0.0284076	-0.269061	0.673	0.798	1	GNAI2	1.54657
DNAJC27	0.0285077	0.111696	0.109	0.026	1	DNAJC27	1.54504
CDC73	0.0285341	-0.287894	0.091	0.228	1	CDC73	1.54464
RTN4	0.0289897	0.178285	0.582	0.395	1	RTN4	1.53776
IRF2BPL	0.0291525	-0.227243	0.055	0.175	1	IRF2BPL	1.53532
CTNNBL1	0.0292908	0.154654	0.327	0.167	1	CTNNBL1	1.53327
PRMT1	0.0296091	0.255066	0.527	0.36	1	PRMT1	1.52858
NFAT5	0.029624	-0.366803	0.182	0.325	1	NFAT5	1.52836
GTPBP4	0.0297036	0.227034	0.4	0.228	1	GTPBP4	1.52719
NCBP3	0.029774	0.186717	0.455	0.254	1	NCBP3	1.52616
DCAF6	0.0299103	0.185643	0.182	0.07	1	DCAF6	1.52418
MRPL18	0.0300709	0.223665	0.4	0.237	1	MRPL18	1.52185
RSAD1	0.0301406	0.216765	0.2	0.079	1	RSAD1	1.52085
C1orf35	0.0301984	0.297881	0.309	0.167	1	C1orf35	1.52002
DYRK1A	0.0304961	0.242077	0.345	0.184	1	DYRK1A	1.51576
RBM18	0.0305984	0.142416	0.2	0.079	1	RBM18	1.5143
AUP1	0.0307123	0.214919	0.4	0.237	1	AUP1	1.51269
STX11	0.031019	0.220074	0.164	0.061	1	STX11	1.50837
TMEM50A	0.0310339	0.178812	0.745	0.518	1	TMEM50A	1.50816
HELZ	0.0311242	-0.301542	0.327	0.474	1	HELZ	1.5069
IFI35	0.0312301	0.333107	0.455	0.289	1	IFI35	1.50543
SIRT7	0.031257	-0.32466	0.273	0.412	1	SIRT7	1.50505
YWHAG	0.0312791	-0.218344	0.036	0.149	1	YWHAG	1.50475
TPM4	0.0314061	0.183323	0.473	0.272	1	TPM4	1.50299
DCTN1	0.0314146	0.240815	0.2	0.088	1	DCTN1	1.50287
KIF21B	0.0314477	-0.252012	0.018	0.114	1	KIF21B	1.50241
ACLY	0.031532	0.11917	0.2	0.079	1	ACLY	1.50125
FAM104A	0.0315478	0.25165	0.273	0.14	1	FAM104A	1.50103
NRBF2	0.0315488	-0.315121	0.145	0.281	1	NRBF2	1.50102
MYBL1	0.0316686	0.205697	0.273	0.132	1	MYBL1	1.49937
C1QBP	0.0318713	0.311997	0.491	0.368	1	C1QBP	1.4966
SAAL1	0.0320636	0.240443	0.164	0.061	1	SAAL1	1.49399
ARRDC3	0.0320705	-0.346884	0.091	0.219	1	ARRDC3	1.49389
RBM26	0.0321743	0.249294	0.455	0.289	1	RBM26	1.49249
NCKAP1L	0.0321985	0.293541	0.4	0.237	1	NCKAP1L	1.49216
RIPK1	0.0323259	0.221959	0.236	0.114	1	RIPK1	1.49045
SP140	0.0323767	0.22945	0.364	0.202	1	SP140	1.48977
BET1	0.0325213	0.149594	0.236	0.105	1	BET1	1.48783
TTC17	0.032558	-0.327851	0.055	0.167	1	TTC17	1.48734
MIR4435-2HG	0.0325717	-0.213236	0.018	0.114	1	MIR4435-2HG	1.48716
MBD1	0.0325717	-0.249379	0.018	0.114	1	MBD1	1.48716
GTF2H3	0.0325971	0.209928	0.164	0.061	1	GTF2H3	1.48682
PCNA	0.0326423	0.395786	0.327	0.184	1	PCNA	1.48622
COX4I1	0.0328768	0.158237	0.891	0.895	1	COX4I1	1.48311
ALDH3A2	0.0328782	0.199004	0.218	0.096	1	ALDH3A2	1.48309
STAT3	0.032887	0.225718	0.527	0.368	1	STAT3	1.48298
CDC40	0.033127	-0.329579	0.291	0.439	1	CDC40	1.47982
E2F1	0.0331465	0.192289	0.145	0.053	1	E2F1	1.47956
CAT	0.0331883	0.0981264	0.236	0.105	1	CAT	1.47901
CNOT6	0.0336869	0.111331	0.164	0.061	1	CNOT6	1.47254
FIGNL1	0.03373	0.226011	0.145	0.053	1	FIGNL1	1.47198
HLA-DQA1	0.03373	-0.250502	0.018	0.114	1	HLA-DQA1	1.47198
FIBP	0.033778	0.237416	0.473	0.316	1	FIBP	1.47137
ENDOG	0.0337953	0.225022	0.2	0.088	1	ENDOG	1.47114
EIF4G1	0.0339602	0.109316	0.364	0.193	1	EIF4G1	1.46903
PITPNB	0.0340183	-0.37868	0.182	0.325	1	PITPNB	1.46829
FKBP3	0.0340935	0.191011	0.418	0.237	1	FKBP3	1.46733
STMN1	0.0341277	0.646782	0.327	0.193	1	STMN1	1.46689
TPRG1L	0.0342434	0.205406	0.164	0.061	1	TPRG1L	1.46542
LARP4	0.0342771	0.263165	0.182	0.079	1	LARP4	1.465
BOLA1	0.0343269	0.150446	0.236	0.105	1	BOLA1	1.46437
PNISR	0.0346919	-0.26723	0.782	0.86	1	PNISR	1.45977
UBE2V2	0.0347233	0.19921	0.382	0.211	1	UBE2V2	1.45938
TRMU	0.0347681	0.180933	0.218	0.096	1	TRMU	1.45882
TRIOBP	0.0347914	0.156475	0.236	0.105	1	TRIOBP	1.45853
MCM6	0.0348078	0.167769	0.164	0.061	1	MCM6	1.45832
SUCLG2	0.0349173	0.185401	0.327	0.175	1	SUCLG2	1.45696
SERTAD1	0.034978	0.163903	0.182	0.07	1	SERTAD1	1.45621
SH3GLB2	0.0350078	0.179273	0.273	0.132	1	SH3GLB2	1.45583
MINDY2	0.0351627	0.254898	0.255	0.123	1	MINDY2	1.45392
RPL34	0.0352517	-0.15981	0.982	1	1	RPL34	1.45282
AC008124.1	0.0352548	0.162188	0.218	0.096	1	AC008124.1	1.45278
RPF2	0.0352966	0.230863	0.2	0.088	1	RPF2	1.45227
ADGRE5	0.0353695	0.246544	0.6	0.412	1	ADGRE5	1.45137
STXBP3	0.0356659	0.153402	0.327	0.167	1	STXBP3	1.44775
NIFK	0.0361246	0.214282	0.491	0.307	1	NIFK	1.4422
TUBA1A	0.0361974	0.226184	0.6	0.395	1	TUBA1A	1.44132
ANKRD13A	0.0362457	0.168675	0.218	0.096	1	ANKRD13A	1.44074
IMP3	0.0363328	0.252391	0.564	0.395	1	IMP3	1.4397
ARPP19	0.0364243	0.239151	0.364	0.219	1	ARPP19	1.43861
UBA7	0.0365487	0.175446	0.164	0.061	1	UBA7	1.43713
NIN	0.0368836	0.133314	0.309	0.158	1	NIN	1.43317
BUD23	0.0370749	0.175074	0.291	0.149	1	BUD23	1.43092
ICAM2	0.0370982	-0.221893	0.109	0.254	1	ICAM2	1.43065
SSR4	0.0372265	0.228875	0.945	0.816	1	SSR4	1.42915
UBE2A	0.0373273	0.145574	0.327	0.167	1	UBE2A	1.42797
PSMB1	0.0374002	0.217417	0.855	0.728	1	PSMB1	1.42713
UNG	0.0375174	0.215988	0.182	0.079	1	UNG	1.42577
EPC1	0.0375956	-0.36321	0.327	0.465	1	EPC1	1.42486
DDX10	0.0376292	0.284964	0.255	0.132	1	DDX10	1.42447
CDC14A	0.0377485	-0.37677	0.127	0.246	1	CDC14A	1.4231
MYCBP	0.0377501	0.131916	0.164	0.061	1	MYCBP	1.42308
RPLP0	0.0377733	0.147543	0.964	0.912	1	RPLP0	1.42282
SYNGR1	0.0377847	0.197819	0.327	0.175	1	SYNGR1	1.42268
TMEM70	0.0379506	0.144903	0.255	0.123	1	TMEM70	1.42078
TPI1	0.0381031	0.231942	0.818	0.64	1	TPI1	1.41904
APRT	0.0381627	0.172752	0.873	0.667	1	APRT	1.41836
TBC1D10B	0.0382987	0.14315	0.218	0.096	1	TBC1D10B	1.41682
JAK3	0.0383587	0.217303	0.382	0.228	1	JAK3	1.41614
PTPN1	0.0384921	0.175814	0.364	0.202	1	PTPN1	1.41463
NPRL3	0.0385619	0.153619	0.218	0.096	1	NPRL3	1.41384
HSPE1	0.0387411	0.255327	0.618	0.43	1	HSPE1	1.41183
UCP2	0.0387477	0.188849	0.582	0.377	1	UCP2	1.41175
GTF2A2	0.0387886	0.180789	0.545	0.351	1	GTF2A2	1.4113
PIGS	0.0388272	0.150777	0.218	0.096	1	PIGS	1.41086
HDAC1	0.0388704	0.183978	0.455	0.263	1	HDAC1	1.41038
GFER	0.0388721	0.223356	0.236	0.114	1	GFER	1.41036
DEAF1	0.0389849	0.167068	0.164	0.061	1	DEAF1	1.4091
SCAMP1-AS1	0.0389849	0.130468	0.164	0.061	1	SCAMP1-AS1	1.4091
CNP	0.0390221	0.180529	0.2	0.088	1	CNP	1.40869
PIGP	0.0391195	0.214534	0.291	0.158	1	PIGP	1.40761
EIF4A3	0.0391721	0.215876	0.4	0.237	1	EIF4A3	1.40702
GAPDH	0.0392086	0.236966	0.982	0.93	1	GAPDH	1.40662
IL4R	0.0393036	-0.343663	0.091	0.211	1	IL4R	1.40557
RPP30	0.0395807	0.175887	0.2	0.088	1	RPP30	1.40252
SUMO1	0.0396053	0.224238	0.691	0.553	1	SUMO1	1.40225
SLC37A3	0.0396151	0.150964	0.164	0.061	1	SLC37A3	1.40214
YIPF6	0.0398935	-0.238482	0.073	0.193	1	YIPF6	1.3991
ARL8B	0.0399027	0.108192	0.218	0.096	1	ARL8B	1.399
GBP5	0.0399519	0.224216	0.509	0.333	1	GBP5	1.39846
TESPA1	0.0400393	0.249626	0.291	0.158	1	TESPA1	1.39751
CENPF	0.0400635	0.555617	0.145	0.053	1	CENPF	1.39725
GSKIP	0.0401486	0.10497	0.182	0.07	1	GSKIP	1.39633
TOMM20	0.0401957	-0.257808	0.364	0.5	1	TOMM20	1.39582
AP5Z1	0.0402539	0.136845	0.164	0.061	1	AP5Z1	1.39519
MRPL19	0.0402885	-0.280941	0.091	0.211	1	MRPL19	1.39482
NGLY1	0.0403854	0.260703	0.345	0.202	1	NGLY1	1.39378
POLE4	0.040506	0.163426	0.291	0.158	1	POLE4	1.39248
SAMD1	0.0407863	0.192798	0.273	0.14	1	SAMD1	1.38949
ARL16	0.0409129	0.135503	0.309	0.158	1	ARL16	1.38814
TCOF1	0.0409243	0.19416	0.255	0.123	1	TCOF1	1.38802
BRD7	0.0409941	0.1531	0.436	0.254	1	BRD7	1.38728
TYROBP	0.0411657	-0.229682	0.945	0.947	1	TYROBP	1.38546
CEP152	0.0415577	0.126273	0.164	0.061	1	CEP152	1.38135
RFWD3	0.0415577	0.116796	0.164	0.061	1	RFWD3	1.38135
OS9	0.0417242	0.23997	0.309	0.167	1	OS9	1.37961
TRAPPC6A	0.0418178	0.24972	0.436	0.272	1	TRAPPC6A	1.37864
TMBIM4	0.0418611	-0.197348	0.6	0.719	1	TMBIM4	1.37819
CLDND1	0.0418714	-0.314928	0.509	0.623	1	CLDND1	1.37808
FMNL3	0.0418797	0.124147	0.236	0.105	1	FMNL3	1.378
MED13	0.0419584	0.171846	0.255	0.123	1	MED13	1.37718
DGCR6L	0.0419642	0.180875	0.418	0.254	1	DGCR6L	1.37712
MALT1	0.0420625	0.263408	0.255	0.132	1	MALT1	1.3761
PAF1	0.04215	0.139551	0.145	0.053	1	PAF1	1.3752
RPL41	0.0421902	-0.11684	1	1	1	RPL41	1.37479
ODF2	0.0422695	0.218775	0.127	0.044	1	ODF2	1.37397
WDR11	0.0425471	0.23528	0.236	0.114	1	WDR11	1.37113
ZNF264	0.0425814	0.227942	0.255	0.132	1	ZNF264	1.37078
GLRX2	0.0425814	0.201434	0.255	0.132	1	GLRX2	1.37078
ANKRD40	0.0427026	0.161368	0.218	0.096	1	ANKRD40	1.36955
APMAP	0.0427936	0.195555	0.636	0.404	1	APMAP	1.36862
MYO19	0.0428656	0.205437	0.145	0.053	1	MYO19	1.36789
CCDC18	0.0428971	0.093761	0.164	0.061	1	CCDC18	1.36757
BCAS3	0.0431282	-0.25455	0.018	0.105	1	BCAS3	1.36524
PHF19	0.0434938	0.193008	0.345	0.193	1	PHF19	1.36157
GID8	0.0435633	0.255181	0.327	0.184	1	GID8	1.36088
HDHD2	0.0435915	0.136017	0.145	0.053	1	HDHD2	1.3606
DCUN1D1	0.0436353	0.223363	0.255	0.132	1	DCUN1D1	1.36016
KLF10	0.0436495	0.193379	0.236	0.114	1	KLF10	1.36002
SMCR8	0.0438223	0.226254	0.127	0.044	1	SMCR8	1.3583
RAB33B	0.0438223	0.220915	0.127	0.044	1	RAB33B	1.3583
ATR	0.0438832	-0.196415	0.018	0.105	1	ATR	1.3577
FCHSD2	0.0438832	-0.226784	0.018	0.105	1	FCHSD2	1.3577
NAALADL1	0.0439086	0.212586	0.218	0.105	1	NAALADL1	1.35745
ICE1	0.0439149	-0.372463	0.109	0.228	1	ICE1	1.35739
H2AFV	0.0439168	0.211463	0.709	0.553	1	H2AFV	1.35737
FASLG	0.0439956	0.262423	0.527	0.351	1	FASLG	1.35659
PAPSS1	0.0442728	0.0757943	0.164	0.061	1	PAPSS1	1.35386
RRP36	0.0442777	0.19465	0.327	0.184	1	RRP36	1.35381
RPS27L	0.0444591	0.213444	0.727	0.588	1	RPS27L	1.35204
NDC80	0.0446167	0.191022	0.127	0.044	1	NDC80	1.3505
PDE12	0.044776	0.212444	0.236	0.114	1	PDE12	1.34895
RAB11FIP2	0.0447844	0.272184	0.182	0.079	1	RAB11FIP2	1.34887
SERPINE2	0.0447844	0.218534	0.182	0.079	1	SERPINE2	1.34887
PDE4B	0.0447844	0.161512	0.182	0.079	1	PDE4B	1.34887
HMGB2	0.0448701	0.623742	0.6	0.447	1	HMGB2	1.34804
CBWD1	0.0449201	0.167129	0.2	0.088	1	CBWD1	1.34756
NARF	0.044948	0.19334	0.418	0.254	1	NARF	1.34729
GNGT2	0.0449745	0.128125	0.164	0.061	1	GNGT2	1.34703
MMD	0.0450744	0.124452	0.145	0.053	1	MMD	1.34607
DUSP11	0.0453973	0.196154	0.273	0.14	1	DUSP11	1.34297
DBN1	0.0454231	0.277881	0.127	0.044	1	DBN1	1.34272
NCSTN	0.0454231	0.162747	0.127	0.044	1	NCSTN	1.34272
SLC4A2	0.0454231	0.140596	0.127	0.044	1	SLC4A2	1.34272
ZNF207	0.0456195	0.208777	0.655	0.474	1	ZNF207	1.34085
MZT2A	0.0458478	0.184628	0.582	0.377	1	MZT2A	1.33868
FKBP8	0.0458567	0.216495	0.618	0.43	1	FKBP8	1.3386
FBXW7	0.0459535	-0.125522	0.036	0.14	1	FBXW7	1.33768
DNMT1	0.0460327	0.303271	0.527	0.368	1	DNMT1	1.33693
PIGF	0.0461042	0.157994	0.182	0.079	1	PIGF	1.33626
PRIM2	0.0467763	0.208177	0.182	0.079	1	PRIM2	1.32997
ATAD1	0.0467763	0.175479	0.182	0.079	1	ATAD1	1.32997
PPP1R16B	0.0468153	0.137902	0.291	0.149	1	PPP1R16B	1.32961
CDR2	0.0470159	-0.209547	0.018	0.105	1	CDR2	1.32775
ZNF75A	0.0470292	0.214311	0.382	0.228	1	ZNF75A	1.32763
TMEM102	0.0470729	0.182845	0.127	0.044	1	TMEM102	1.32723
EIF2B1	0.0471027	0.132108	0.236	0.114	1	EIF2B1	1.32695
HPRT1	0.047177	0.168522	0.309	0.167	1	HPRT1	1.32627
FAM3A	0.0473784	0.167153	0.145	0.053	1	FAM3A	1.32442
FANCL	0.0473784	0.100928	0.145	0.053	1	FANCL	1.32442
NDUFC2	0.0474565	0.198604	0.745	0.579	1	NDUFC2	1.3237
CBX7	0.0474566	0.158774	0.182	0.079	1	CBX7	1.3237
POM121	0.0475023	0.167107	0.218	0.105	1	POM121	1.32329
COMMD8	0.0476232	0.146626	0.4	0.237	1	COMMD8	1.32218
AP3M2	0.0477	0.174577	0.236	0.114	1	AP3M2	1.32148
MRPS12	0.0478556	0.140798	0.527	0.342	1	MRPS12	1.32007
NTPCR	0.0478758	0.108884	0.164	0.061	1	NTPCR	1.31988
ATG3	0.0479483	0.160172	0.309	0.175	1	ATG3	1.31923
UFSP2	0.0481406	-0.278351	0.055	0.158	1	UFSP2	1.31749
TUBGCP3	0.048168	0.104806	0.145	0.053	1	TUBGCP3	1.31724
RBMS1	0.0482554	0.239278	0.473	0.316	1	RBMS1	1.31645
AK6	0.0483037	0.17299	0.236	0.114	1	AK6	1.31602
WWP1	0.0484479	0.149104	0.291	0.149	1	WWP1	1.31473
SNAP47	0.0488074	-0.286788	0.055	0.158	1	SNAP47	1.31151
RBM15B	0.0489687	0.081796	0.145	0.053	1	RBM15B	1.31008
RNF126	0.0491034	0.119808	0.364	0.211	1	RNF126	1.30889
SLC15A4	0.049173	0.184998	0.291	0.158	1	SLC15A4	1.30827
ISG20	0.0493974	0.341143	0.491	0.368	1	ISG20	1.3063
WEE1	0.0493992	0.178831	0.109	0.035	1	WEE1	1.30628
MCM2	0.0493992	0.167069	0.109	0.035	1	MCM2	1.30628
UBE2N	0.0494629	0.203372	0.491	0.325	1	UBE2N	1.30572
DDX55	0.049482	0.137286	0.2	0.088	1	DDX55	1.30555
RRP1B	0.0496281	0.224095	0.382	0.237	1	RRP1B	1.30427
CLIC1	0.0496395	0.160338	0.982	0.921	1	CLIC1	1.30417
DTHD1	0.0496419	0.204177	0.127	0.044	1	DTHD1	1.30415
COQ3	0.0496419	0.110609	0.127	0.044	1	COQ3	1.30415
BECN1	0.0497102	0.18156	0.218	0.105	1	BECN1	1.30355
STIM2	0.0497452	0.231545	0.345	0.211	1	STIM2	1.30325
SNAPC5	0.0498576	0.162781	0.273	0.14	1	SNAPC5	1.30227
NSFL1C	0.0501533	0.136189	0.236	0.114	1	NSFL1C	1.2997
SLC7A6OS	0.0503756	0.115748	0.309	0.158	1	SLC7A6OS	1.29778
ETS2	0.050524	0.113745	0.127	0.044	1	ETS2	1.2965
FBXL3	0.0507828	0.109581	0.236	0.114	1	FBXL3	1.29428
HIST1H2AC	0.0508546	0.172295	0.2	0.088	1	HIST1H2AC	1.29367
NADK	0.0508546	0.11494	0.2	0.088	1	NADK	1.29367
KMT5A	0.0509842	0.12675	0.182	0.079	1	KMT5A	1.29256
NUSAP1	0.0513289	0.402337	0.109	0.035	1	NUSAP1	1.28964
ICMT	0.0514191	0.12445	0.127	0.044	1	ICMT	1.28888
NUP205	0.0514191	0.122572	0.127	0.044	1	NUP205	1.28888
TOGARAM2	0.0514191	0.110824	0.127	0.044	1	TOGARAM2	1.28888
ARPC5	0.0515356	0.204009	0.836	0.667	1	ARPC5	1.28789
GLRX5	0.0520552	0.278983	0.418	0.298	1	GLRX5	1.28354
NUP210	0.0520619	0.111418	0.236	0.114	1	NUP210	1.28348
EHBP1	0.0520664	-0.12739	0.018	0.105	1	EHBP1	1.28344
ISCA1	0.0522221	0.155185	0.273	0.14	1	ISCA1	1.28215
TMEM60	0.0522248	-0.268693	0.109	0.228	1	TMEM60	1.28212
KLHDC7B	0.0523172	0.151351	0.109	0.035	1	KLHDC7B	1.28136
S100A4	0.0526051	0.260363	0.891	0.86	1	S100A4	1.27897
IPO9	0.0526757	-0.341851	0.073	0.175	1	IPO9	1.27839
DECR1	0.0527144	0.168432	0.364	0.211	1	DECR1	1.27807
TBK1	0.0527144	-0.338482	0.182	0.298	1	TBK1	1.27807
GSS	0.0527877	0.171269	0.2	0.096	1	GSS	1.27747
SMIM10L1	0.0529295	0.203919	0.418	0.263	1	SMIM10L1	1.2763
DTYMK	0.0530917	0.287627	0.309	0.193	1	DTYMK	1.27497
MRPS18A	0.0532043	0.14366	0.182	0.079	1	MRPS18A	1.27405
ACAA2	0.0533776	0.174967	0.436	0.263	1	ACAA2	1.27264
TAGAP	0.0534391	0.327206	0.273	0.14	1	TAGAP	1.27214
RPS3A	0.0534856	-0.126433	0.982	1	1	RPS3A	1.27176
ENOPH1	0.0535146	0.224974	0.255	0.132	1	ENOPH1	1.27153
THOC2	0.0539607	0.238224	0.418	0.254	1	THOC2	1.26792
G6PD	0.0540353	0.203048	0.273	0.149	1	G6PD	1.26732
OSTC	0.0540851	0.26133	0.564	0.439	1	OSTC	1.26692
ZNF655	0.0541419	0.0951464	0.327	0.175	1	ZNF655	1.26647
MED25	0.0543415	0.139583	0.109	0.035	1	MED25	1.26487
POLR3H	0.0543415	0.118237	0.109	0.035	1	POLR3H	1.26487
CCHCR1	0.0543415	0.111147	0.109	0.035	1	CCHCR1	1.26487
TRIM73	0.0547008	0.184634	0.236	0.114	1	TRIM73	1.26201
LINC02084	0.0547288	0.186326	0.182	0.079	1	LINC02084	1.26178
KPNA6	0.0547335	0.175811	0.218	0.105	1	KPNA6	1.26175
ROMO1	0.054897	0.170482	0.436	0.263	1	ROMO1	1.26045
DUT	0.0552475	0.466206	0.4	0.254	1	DUT	1.25769
CIAO1	0.0552664	0.205912	0.291	0.158	1	CIAO1	1.25754
GLRX	0.0553367	0.266355	0.527	0.342	1	GLRX	1.25699
NDUFAB1	0.0554053	0.197213	0.636	0.482	1	NDUFAB1	1.25645
DHX29	0.0554626	0.118518	0.291	0.149	1	DHX29	1.256
MALAT1	0.0555942	-0.15956	1	1	1	MALAT1	1.25497
ADPGK	0.0559021	0.0672874	0.273	0.132	1	ADPGK	1.25257
FLNA	0.0559298	0.217913	0.418	0.272	1	FLNA	1.25236
RIPOR2	0.0560068	-0.289031	0.182	0.307	1	RIPOR2	1.25176
CNBP	0.0560192	0.210885	0.691	0.482	1	CNBP	1.25166
KRT81	0.0561866	0.263575	0.291	0.158	1	KRT81	1.25037
SIVA1	0.0562492	0.177769	0.636	0.456	1	SIVA1	1.24988
CEBPG	0.0562895	0.125308	0.182	0.079	1	CEBPG	1.24957
TCF19	0.0564308	0.093656	0.109	0.035	1	TCF19	1.24848
YTHDF2	0.0565394	0.162693	0.509	0.316	1	YTHDF2	1.24765
NDUFS5	0.0566317	0.244424	0.764	0.605	1	NDUFS5	1.24694
EBAG9	0.0568604	0.111949	0.255	0.123	1	EBAG9	1.24519
EIF4B	0.0569129	0.1962	0.527	0.377	1	EIF4B	1.24479
EID2B	0.057073	0.12087	0.127	0.044	1	EID2B	1.24357
IPP	0.057073	0.0951291	0.127	0.044	1	IPP	1.24357
BLVRB	0.0571419	0.196665	0.2	0.096	1	BLVRB	1.24305
CTR9	0.0572067	0.1984	0.236	0.123	1	CTR9	1.24255
HDAC3	0.0572074	0.279258	0.255	0.14	1	HDAC3	1.24255
PLEK	0.057243	0.203139	0.436	0.281	1	PLEK	1.24228
TRGC1	0.057325	0.163759	0.436	0.254	1	TRGC1	1.24166
RPAIN	0.0573331	0.187988	0.345	0.211	1	RPAIN	1.24159
BAG5	0.0574224	-0.311368	0.145	0.272	1	BAG5	1.24092
NEPRO	0.0574459	0.245355	0.291	0.167	1	NEPRO	1.24074
SMYD3	0.0574914	0.202219	0.164	0.07	1	SMYD3	1.2404
SUN1	0.0575002	0.178369	0.109	0.035	1	SUN1	1.24033
DHX9	0.0575656	0.154414	0.309	0.175	1	DHX9	1.23984
LASP1	0.0575852	0.236307	0.455	0.281	1	LASP1	1.23969
PPP1CA	0.0577106	0.220422	0.709	0.596	1	PPP1CA	1.23874
SH3KBP1	0.057717	0.148898	0.527	0.325	1	SH3KBP1	1.2387
RPL13	0.0577716	-0.0872403	1	1	1	RPL13	1.23829
C22orf39	0.0578958	0.1925	0.2	0.096	1	C22orf39	1.23735
ZNF569	0.0580638	0.0971818	0.127	0.044	1	ZNF569	1.23609
RAB3GAP2	0.0580936	0.17795	0.255	0.132	1	RAB3GAP2	1.23587
HSP90AA1	0.0581438	0.191107	0.982	0.886	1	HSP90AA1	1.2355
PPP2R5A	0.0582226	0.257691	0.236	0.132	1	PPP2R5A	1.23491
GLIPR2	0.0582494	0.187587	0.582	0.404	1	GLIPR2	1.23471
ITGB1BP1	0.0584384	0.245385	0.491	0.316	1	ITGB1BP1	1.2333
TMX4	0.0585314	-0.28255	0.382	0.518	1	TMX4	1.23261
ZNF30	0.0585865	0.180465	0.109	0.035	1	ZNF30	1.2322
LINC00426	0.0585865	0.12473	0.109	0.035	1	LINC00426	1.2322
C3AR1	0.0585865	0.121307	0.109	0.035	1	C3AR1	1.2322
ZNF160	0.0587695	-0.130723	0.036	0.132	1	ZNF160	1.23085
GIMAP1	0.058998	-0.22496	0.6	0.719	1	GIMAP1	1.22916
FEZ1	0.0590689	0.104545	0.127	0.044	1	FEZ1	1.22864
TPST2	0.059267	0.165631	0.436	0.272	1	TPST2	1.22719
MOGS	0.0596032	0.213187	0.273	0.158	1	MOGS	1.22473
HOPX	0.0596059	-0.223818	0.818	0.868	1	HOPX	1.22471
SURF4	0.059708	0.258136	0.345	0.228	1	SURF4	1.22397
NCOA4	0.0597851	0.159948	0.273	0.149	1	NCOA4	1.22341
SEC23IP	0.0600711	0.17397	0.164	0.07	1	SEC23IP	1.22133
STAT4	0.0602705	0.179078	0.382	0.237	1	STAT4	1.2199
TMEM129	0.0603541	0.105197	0.182	0.079	1	TMEM129	1.21929
ECD	0.0604781	0.200324	0.145	0.061	1	ECD	1.2184
MCRIP2	0.0605507	0.14772	0.218	0.105	1	MCRIP2	1.21788
CCDC127	0.0605747	0.0649385	0.2	0.088	1	CCDC127	1.21771
FAM118A	0.0605748	-0.246698	0.327	0.43	1	FAM118A	1.21771
ARMH3	0.0608101	0.143525	0.109	0.035	1	ARMH3	1.21602
ACOT4	0.0608101	0.13417	0.109	0.035	1	ACOT4	1.21602
AC090114.2	0.0608101	0.123062	0.109	0.035	1	AC090114.2	1.21602
STX2	0.0608101	0.0724742	0.109	0.035	1	STX2	1.21602
CMAS	0.0608534	0.12513	0.255	0.132	1	CMAS	1.21572
POMP	0.0609344	0.241414	0.727	0.614	1	POMP	1.21514
PSME4	0.0610283	-0.251224	0.091	0.202	1	PSME4	1.21447
MALSU1	0.0613864	-0.236835	0.091	0.202	1	MALSU1	1.21193
ST8SIA4	0.0613989	0.125614	0.327	0.175	1	ST8SIA4	1.21184
CHMP5	0.0618183	0.21559	0.455	0.316	1	CHMP5	1.20888
CHD6	0.0618253	0.100262	0.309	0.167	1	CHD6	1.20883
XRCC4	0.0618437	0.181807	0.164	0.07	1	XRCC4	1.2087
TM7SF2	0.0619479	0.138675	0.109	0.035	1	TM7SF2	1.20797
GAN	0.0619479	0.104839	0.109	0.035	1	GAN	1.20797
MTMR9	0.0619773	0.17002	0.291	0.158	1	MTMR9	1.20777
TBC1D17	0.0620177	-0.234344	0.036	0.123	1	TBC1D17	1.20748
BACH1	0.0620177	-0.245311	0.036	0.123	1	BACH1	1.20748
ARFIP1	0.0620825	0.106687	0.218	0.105	1	ARFIP1	1.20703
CENPQ	0.0621712	0.0520697	0.127	0.044	1	CENPQ	1.20641
SMYD2	0.0621712	0.0493737	0.127	0.044	1	SMYD2	1.20641
RBCK1	0.0622013	0.11052	0.473	0.289	1	RBCK1	1.2062
ABCA5	0.0624357	-0.27604	0.055	0.149	1	ABCA5	1.20457
CD96	0.0627264	-0.260442	0.673	0.667	1	CD96	1.20255
FBXO42	0.0628604	0.103715	0.218	0.105	1	FBXO42	1.20162
FLOT2	0.0628604	-0.258967	0.073	0.175	1	FLOT2	1.20162
ZCCHC7	0.063024	-0.174571	0.055	0.158	1	ZCCHC7	1.20049
GBA2	0.0631032	0.140655	0.109	0.035	1	GBA2	1.19995
DDX11	0.0631032	0.0970407	0.109	0.035	1	DDX11	1.19995
VPS18	0.0631032	0.0362804	0.109	0.035	1	VPS18	1.19995
CREB3	0.0631496	0.195843	0.218	0.114	1	CREB3	1.19963
TOX4	0.0631698	0.178361	0.418	0.263	1	TOX4	1.19949
PDIA3	0.063614	0.245279	0.709	0.596	1	PDIA3	1.19645
TNK2	0.0636594	0.134512	0.164	0.07	1	TNK2	1.19614
HPF1	0.0638932	0.184091	0.273	0.149	1	HPF1	1.19455
NIP7	0.0639371	0.217749	0.309	0.175	1	NIP7	1.19425
UXS1	0.0641198	0.21918	0.255	0.14	1	UXS1	1.19301
PPP1R2	0.0641232	-0.315924	0.509	0.605	1	PPP1R2	1.19298
SUZ12	0.0641384	0.281204	0.4	0.263	1	SUZ12	1.19288
APH1B	0.0642763	0.107771	0.109	0.035	1	APH1B	1.19195
ARFGEF2	0.0642763	0.093908	0.109	0.035	1	ARFGEF2	1.19195
MED4	0.0644928	0.0767038	0.418	0.246	1	MED4	1.19049
RPS13	0.0649762	-0.134768	0.982	0.991	1	RPS13	1.18725
CDK12	0.0651665	0.300635	0.291	0.175	1	CDK12	1.18598
SELPLG	0.0654806	0.186808	0.364	0.219	1	SELPLG	1.18389
PIGX	0.0658764	0.208437	0.182	0.088	1	PIGX	1.18127
ATAD5	0.0658764	0.199023	0.182	0.088	1	ATAD5	1.18127
ZDHHC2	0.0659435	0.172019	0.255	0.132	1	ZDHHC2	1.18083
DNTTIP2	0.0659732	0.187624	0.418	0.272	1	DNTTIP2	1.18063
AL135925.1	0.0664505	0.0975824	0.182	0.079	1	AL135925.1	1.1775
PPP4C	0.0664849	0.166595	0.545	0.342	1	PPP4C	1.17728
TFDP1	0.0667483	0.143616	0.2	0.096	1	TFDP1	1.17556
XAF1	0.0667524	0.154404	0.364	0.219	1	XAF1	1.17553
TTI2	0.0667818	-0.210341	0.036	0.123	1	TTI2	1.17534
ERCC1	0.0667895	0.172463	0.345	0.202	1	ERCC1	1.17529
PPM1A	0.0668153	0.0894485	0.291	0.158	1	PPM1A	1.17512
GSTP1	0.0668385	0.0869604	0.873	0.763	1	GSTP1	1.17497
CLTC	0.0668731	0.246206	0.418	0.272	1	CLTC	1.17475
METTL26	0.0669486	-0.287598	0.418	0.509	1	METTL26	1.17426
B3GALT4	0.067355	0.174959	0.309	0.184	1	B3GALT4	1.17163
TRMT1	0.0674228	0.148761	0.164	0.07	1	TRMT1	1.17119
SNF8	0.0674694	0.219098	0.545	0.377	1	SNF8	1.17089
JKAMP	0.0676983	-0.209599	0.073	0.175	1	JKAMP	1.16942
S1PR5	0.0679041	0.0669621	0.109	0.035	1	S1PR5	1.1681
PRR5L	0.0679199	0.147303	0.218	0.114	1	PRR5L	1.168
GSDMD	0.0680519	0.155869	0.491	0.298	1	GSDMD	1.16716
MRPS7	0.0682927	0.164097	0.527	0.368	1	MRPS7	1.16563
GIT1	0.0683918	0.079743	0.164	0.07	1	GIT1	1.165
MDM4	0.068426	-0.239676	0.273	0.43	1	MDM4	1.16478
ZFR	0.0685645	0.176918	0.364	0.228	1	ZFR	1.1639
TROVE2	0.0687828	0.192866	0.345	0.219	1	TROVE2	1.16252
RPL4	0.0688826	-0.196278	0.873	0.86	1	RPL4	1.16189
CAPZA1	0.0692159	0.202569	0.473	0.325	1	CAPZA1	1.15979
FAM210A	0.0693473	0.132445	0.2	0.096	1	FAM210A	1.15897
C9orf16	0.0693664	0.258964	0.691	0.544	1	C9orf16	1.15885
DPM1	0.0693775	-0.216738	0.073	0.175	1	DPM1	1.15878
NOTCH1	0.0694835	-0.307731	0.182	0.289	1	NOTCH1	1.15812
HNRNPR	0.0696214	0.220934	0.655	0.526	1	HNRNPR	1.15726
PSMB7	0.0696921	0.182327	0.491	0.351	1	PSMB7	1.15682
ASCC3	0.0697305	0.126562	0.273	0.149	1	ASCC3	1.15658
OASL	0.0697309	0.320547	0.291	0.175	1	OASL	1.15657
SYTL1	0.0697329	0.194245	0.4	0.254	1	SYTL1	1.15656
YDJC	0.0697958	0.18113	0.309	0.184	1	YDJC	1.15617
NFYB	0.0698212	0.185977	0.345	0.211	1	NFYB	1.15601
DDOST	0.0698389	0.20485	0.455	0.316	1	DDOST	1.1559
DNAJC9	0.0699291	0.17499	0.327	0.193	1	DNAJC9	1.15534
EIF4G3	0.0699404	-0.270771	0.091	0.193	1	EIF4G3	1.15527
LSM10	0.0701085	0.144433	0.491	0.316	1	LSM10	1.15423
CCNT2	0.0702298	0.131611	0.218	0.105	1	CCNT2	1.15348
NBEAL2	0.0702319	0.162972	0.2	0.096	1	NBEAL2	1.15347
SNX4	0.0702319	0.129486	0.2	0.096	1	SNX4	1.15347
ERI3	0.0704084	0.166079	0.145	0.061	1	ERI3	1.15238
TIGD5	0.0704084	0.137377	0.145	0.061	1	TIGD5	1.15238
THAP4	0.0704149	0.0805391	0.109	0.035	1	THAP4	1.15234
NDUFA6	0.0706547	0.167149	0.455	0.298	1	NDUFA6	1.15086
ANKRD13D	0.0708805	0.19078	0.545	0.36	1	ANKRD13D	1.14947
CCNG2	0.0709172	0.182125	0.255	0.14	1	CCNG2	1.14925
CCDC47	0.0710517	0.178846	0.291	0.167	1	CCDC47	1.14843
ZNF511	0.071052	0.186288	0.291	0.167	1	ZNF511	1.14842
BAX	0.0710628	0.18197	0.636	0.465	1	BAX	1.14836
GNG5	0.0710935	0.229825	0.745	0.623	1	GNG5	1.14817
TBPL1	0.0712058	0.127693	0.291	0.158	1	TBPL1	1.14748
POC5	0.0714711	0.142073	0.145	0.061	1	POC5	1.14587
RAPGEF6	0.0715808	0.149473	0.236	0.123	1	RAPGEF6	1.1452
CEP95	0.0715808	-0.2632	0.091	0.193	1	CEP95	1.1452
ZNRF1	0.0716072	0.125172	0.309	0.175	1	ZNRF1	1.14504
UBL5	0.071609	0.164762	0.891	0.649	1	UBL5	1.14503
ELL	0.071614	0.248521	0.164	0.079	1	ELL	1.145
ITGB3BP	0.0719602	0.103708	0.218	0.105	1	ITGB3BP	1.14291
VAMP2	0.0719698	-0.321071	0.582	0.667	1	VAMP2	1.14285
ERCC6L2	0.0720717	0.0714988	0.182	0.079	1	ERCC6L2	1.14224
MKLN1	0.0720798	0.2445	0.2	0.105	1	MKLN1	1.14219
HAT1	0.072221	0.0995174	0.364	0.202	1	HAT1	1.14134
RPL21	0.0723724	-0.109019	1	1	1	RPL21	1.14043
ORC3	0.0725462	0.136108	0.145	0.061	1	ORC3	1.13939
DNAJB1	0.0725469	0.149701	0.145	0.061	1	DNAJB1	1.13938
CISD2	0.0725586	0.21164	0.364	0.228	1	CISD2	1.13931
GOSR2	0.0728384	-0.194831	0.073	0.175	1	GOSR2	1.13764
EIF4H	0.0729322	-0.272127	0.255	0.368	1	EIF4H	1.13708
ZPR1	0.0729413	0.154914	0.2	0.096	1	ZPR1	1.13703
ADPRHL2	0.0729413	0.123802	0.2	0.096	1	ADPRHL2	1.13703
APPL1	0.0730761	-0.345382	0.2	0.298	1	APPL1	1.13622
UBE2M	0.0731659	0.13797	0.564	0.395	1	UBE2M	1.13569
FOXJ3	0.0732271	-0.222419	0.055	0.149	1	FOXJ3	1.13533
TNRC6C	0.0734087	-0.234096	0.145	0.263	1	TNRC6C	1.13425
CAST	0.0735281	-0.287998	0.473	0.579	1	CAST	1.13355
PSMD7	0.073976	0.208182	0.564	0.439	1	PSMD7	1.13091
TMEM18	0.0741225	0.16914	0.255	0.14	1	TMEM18	1.13005
NBEAL1	0.0741847	0.164573	0.145	0.061	1	NBEAL1	1.12969
NABP2	0.0741914	0.145391	0.182	0.088	1	NABP2	1.12965
HUWE1	0.074352	0.130763	0.345	0.202	1	HUWE1	1.12871
RANGAP1	0.0744485	0.12798	0.164	0.07	1	RANGAP1	1.12814
FNDC3A	0.0746212	-0.241773	0.073	0.175	1	FNDC3A	1.12714
FAM208B	0.0746245	0.242234	0.164	0.079	1	FAM208B	1.12712
HMGN1	0.0746747	0.276731	0.764	0.64	1	HMGN1	1.12683
ZNF121	0.0747383	0.119877	0.145	0.061	1	ZNF121	1.12646
USP39	0.0747383	0.116712	0.145	0.061	1	USP39	1.12646
PTBP3	0.0749792	0.187281	0.4	0.254	1	PTBP3	1.12506
RBM28	0.0750726	0.177527	0.345	0.202	1	RBM28	1.12452
TOLLIP	0.075166	0.155511	0.182	0.088	1	TOLLIP	1.12398
CCPG1	0.0756738	-0.265225	0.182	0.298	1	CCPG1	1.12105
SLC30A5	0.0757171	0.231539	0.2	0.105	1	SLC30A5	1.12081
TADA3	0.0757663	0.194089	0.491	0.333	1	TADA3	1.12052
E2F4	0.07582	0.148869	0.236	0.123	1	E2F4	1.12022
KHSRP	0.0759255	0.196378	0.236	0.132	1	KHSRP	1.11961
TRAF2	0.0760312	0.0405082	0.182	0.079	1	TRAF2	1.11901
ARL4C	0.0760801	-0.232472	0.727	0.746	1	ARL4C	1.11873
EBNA1BP2	0.0760933	0.236197	0.291	0.175	1	EBNA1BP2	1.11865
LRRFIP2	0.0761511	0.171377	0.182	0.088	1	LRRFIP2	1.11832
DHRS1	0.0765384	-0.290687	0.055	0.14	1	DHRS1	1.11612
ERGIC3	0.0768136	0.175621	0.273	0.149	1	ERGIC3	1.11456
OGDH	0.0769834	0.185905	0.145	0.061	1	OGDH	1.1136
ELMOD2	0.0771466	0.177143	0.182	0.088	1	ELMOD2	1.11268
MAT2A	0.0771709	0.256023	0.309	0.202	1	MAT2A	1.11255
GGA1	0.0771709	0.142595	0.327	0.193	1	GGA1	1.11255
TMEM205	0.0776072	0.238973	0.236	0.14	1	TMEM205	1.1101
MPLKIP	0.0776438	0.1711	0.509	0.342	1	MPLKIP	1.10989
CASTOR3	0.0782326	0.214313	0.127	0.053	1	CASTOR3	1.10661
PPA1	0.0784186	0.180603	0.4	0.254	1	PPA1	1.10558
SF3B1	0.0784459	-0.240136	0.527	0.614	1	SF3B1	1.10543
LARS	0.0787634	0.149305	0.345	0.202	1	LARS	1.10368
EMC8	0.0788068	0.164316	0.273	0.158	1	EMC8	1.10344
M6PR	0.0789305	0.107875	0.527	0.333	1	M6PR	1.10275
SNU13	0.0791337	0.215515	0.691	0.526	1	SNU13	1.10164
COX7B	0.0792245	0.166773	0.673	0.553	1	COX7B	1.10114
SS18L2	0.0793605	0.187119	0.455	0.316	1	SS18L2	1.1004
EIF5B	0.0795682	0.206566	0.564	0.412	1	EIF5B	1.09926
NPTN	0.0795969	0.170414	0.2	0.096	1	NPTN	1.0991
EBPL	0.0796358	0.165594	0.273	0.158	1	EBPL	1.09889
UQCRH	0.079792	0.191723	0.8	0.711	1	UQCRH	1.09804
ALKBH4	0.0798712	0.196042	0.164	0.079	1	ALKBH4	1.09761
ADAR	0.0798773	0.251602	0.418	0.298	1	ADAR	1.09758
SUMO3	0.0800062	0.180615	0.4	0.263	1	SUMO3	1.09688
PSD4	0.0800721	0.224218	0.345	0.219	1	PSD4	1.09652
KIF20B	0.0801971	0.22429	0.182	0.088	1	KIF20B	1.09584
SIRT2	0.0802092	0.139102	0.218	0.114	1	SIRT2	1.09578
USP28	0.0802338	0.199795	0.327	0.193	1	USP28	1.09564
TRAPPC3	0.0802908	0.195255	0.327	0.202	1	TRAPPC3	1.09533
ZMAT5	0.0804539	0.108814	0.145	0.061	1	ZMAT5	1.09445
CCT3	0.0804848	0.149805	0.655	0.526	1	CCT3	1.09429
PARP1	0.0805131	0.196751	0.564	0.412	1	PARP1	1.09413
EHD4	0.0807223	0.198298	0.127	0.053	1	EHD4	1.09301
C18orf25	0.081152	0.138343	0.218	0.114	1	C18orf25	1.0907
TMEM30A	0.0811751	-0.209485	0.091	0.193	1	TMEM30A	1.09058
PGP	0.0812237	0.177165	0.509	0.342	1	PGP	1.09032
TMX2	0.0812711	0.202258	0.291	0.175	1	TMX2	1.09006
GFI1	0.0814526	0.214519	0.2	0.105	1	GFI1	1.0891
CCAR2	0.0816386	0.12356	0.145	0.061	1	CCAR2	1.0881
FO393401.1	0.0816386	0.0833031	0.145	0.061	1	FO393401.1	1.0881
BCKDK	0.0816386	0.0774087	0.145	0.061	1	BCKDK	1.0881
VPS50	0.0816386	0.0766029	0.145	0.061	1	VPS50	1.0881
HDDC2	0.0819416	0.122301	0.509	0.333	1	HDDC2	1.0865
MTHFD1	0.0819911	0.177536	0.127	0.053	1	MTHFD1	1.08623
SCAF11	0.0824736	-0.276365	0.582	0.737	1	SCAF11	1.08369
CFL2	0.0828374	0.129151	0.145	0.061	1	CFL2	1.08177
PPP1CC	0.0828771	0.0987528	0.418	0.254	1	PPP1CC	1.08157
FARSA	0.0830647	0.160303	0.218	0.114	1	FARSA	1.08058
CDKN2C	0.0831987	0.0321913	0.164	0.07	1	CDKN2C	1.07988
KCNQ1OT1	0.083276	0.200728	0.127	0.053	1	KCNQ1OT1	1.07948
NDUFA8	0.0832821	0.103472	0.364	0.202	1	NDUFA8	1.07945
KHDC4	0.0833553	0.0815073	0.255	0.132	1	KHDC4	1.07907
PWWP2A	0.0836165	0.0702595	0.2	0.096	1	PWWP2A	1.07771
RPS15A	0.0836908	-0.100521	1	1	1	RPS15A	1.07732
PSPC1	0.0840347	0.125366	0.218	0.114	1	PSPC1	1.07554
SH2D3C	0.0840505	0.0585283	0.145	0.061	1	SH2D3C	1.07546
LUC7L3	0.0842638	-0.229424	0.655	0.711	1	LUC7L3	1.07436
RPL29	0.0842922	-0.110297	1	1	1	RPL29	1.07421
MXD4	0.0843724	0.15308	0.509	0.36	1	MXD4	1.0738
DUSP12	0.0844162	0.142513	0.182	0.088	1	DUSP12	1.07357
SMDT1	0.084453	0.218123	0.691	0.614	1	SMDT1	1.07338
MRPS11	0.0844778	0.232655	0.382	0.246	1	MRPS11	1.07326
44085	0.0845995	0.165313	0.291	0.167	1	44085	1.07263
SNRPD1	0.0847402	0.196217	0.545	0.412	1	SNRPD1	1.07191
FGD5-AS1	0.0848862	0.173957	0.236	0.132	1	FGD5-AS1	1.07116
IGF2R	0.0848862	0.139535	0.236	0.132	1	IGF2R	1.07116
SUSD6	0.0849129	0.113573	0.236	0.123	1	SUSD6	1.07103
CSGALNACT2	0.0849129	0.0596403	0.236	0.123	1	CSGALNACT2	1.07103
COMMD2	0.0849303	0.138794	0.382	0.237	1	COMMD2	1.07094
POLR1E	0.0850137	0.146323	0.218	0.114	1	POLR1E	1.07051
MCM7	0.0851737	0.373626	0.182	0.096	1	MCM7	1.06969
RAP1GDS1	0.0851984	0.156951	0.273	0.158	1	RAP1GDS1	1.06957
RPL11	0.0852011	-0.0992238	1	1	1	RPL11	1.06955
TXLNG	0.0852778	0.0616037	0.145	0.061	1	TXLNG	1.06916
RPL18A	0.085506	-0.101089	1	1	1	RPL18A	1.068
CCSER2	0.0855198	0.184037	0.436	0.289	1	CCSER2	1.06793
MRPL17	0.0857774	0.126275	0.345	0.202	1	MRPL17	1.06663
LMO4	0.0859579	-0.296209	0.255	0.368	1	LMO4	1.06571
DOCK5	0.0861486	-0.295843	0.055	0.14	1	DOCK5	1.06475
MRPS18C	0.086381	0.20503	0.382	0.246	1	MRPS18C	1.06358
MTRNR2L12	0.0863829	-0.242631	0.582	0.64	1	MTRNR2L12	1.06357
ZNF836	0.0865197	0.125712	0.145	0.061	1	ZNF836	1.06289
SMC2	0.0865263	0.191256	0.273	0.158	1	SMC2	1.06285
RMND5A	0.0865921	0.131041	0.182	0.088	1	RMND5A	1.06252
ZC3H7A	0.0867321	-0.308988	0.145	0.246	1	ZC3H7A	1.06182
HLA-A	0.0867337	0.127819	1	1	1	HLA-A	1.06181
TRPV2	0.0868333	0.123848	0.236	0.123	1	TRPV2	1.06131
RBBP7	0.0868559	0.165777	0.345	0.211	1	RBBP7	1.0612
RBPJ	0.0869022	-0.269384	0.473	0.57	1	RBPJ	1.06097
LFNG	0.0869991	0.169172	0.218	0.114	1	LFNG	1.06049
RAB5A	0.0872741	-0.231641	0.055	0.14	1	RAB5A	1.05911
CYBA	0.0873529	0.0893284	1	0.991	1	CYBA	1.05872
SNX14	0.0874869	-0.228374	0.164	0.272	1	SNX14	1.05806
PSMD1	0.0875979	0.156886	0.291	0.175	1	PSMD1	1.05751
FDPS	0.0877218	0.168425	0.545	0.421	1	FDPS	1.05689
S1PR4	0.0877218	-0.197805	0.382	0.5	1	S1PR4	1.05689
MSH6	0.0877354	0.105802	0.236	0.132	1	MSH6	1.05683
TMEM101	0.087776	-0.151154	0.036	0.114	1	TMEM101	1.05662
CBX5	0.0878422	0.216877	0.309	0.193	1	CBX5	1.0563
BICDL1	0.0878422	-0.269469	0.164	0.263	1	BICDL1	1.0563
EEF1A1	0.0879757	-0.0995978	1	1	1	EEF1A1	1.05564
FKBP2	0.0881956	0.248207	0.618	0.491	1	FKBP2	1.05455
GPCPD1	0.0885796	0.116331	0.127	0.053	1	GPCPD1	1.05267
RMI2	0.0885796	0.108349	0.127	0.053	1	RMI2	1.05267
PAFAH1B3	0.0885843	0.174757	0.2	0.105	1	PAFAH1B3	1.05264
PIP4P1	0.088813	0.123515	0.182	0.088	1	PIP4P1	1.05152
CCNT1	0.0888861	0.133044	0.164	0.079	1	CCNT1	1.05117
ZNF528	0.0890463	-0.162714	0.036	0.114	1	ZNF528	1.05038
TNKS2	0.0892312	0.167648	0.273	0.158	1	TNKS2	1.04948
HIF1A	0.0894974	0.0801033	0.382	0.246	1	HIF1A	1.04819
PLIN3	0.0896431	0.181437	0.2	0.105	1	PLIN3	1.04748
ALKBH5	0.0897368	-0.256276	0.091	0.184	1	ALKBH5	1.04703
RBMX2	0.0897795	0.109092	0.236	0.123	1	RBMX2	1.04682
POLR2H	0.0898528	0.173209	0.309	0.184	1	POLR2H	1.04647
AZIN1	0.0899406	0.126777	0.182	0.088	1	AZIN1	1.04604
HENMT1	0.090019	0.129075	0.327	0.193	1	HENMT1	1.04567
ZDHHC18	0.0900416	-0.264727	0.109	0.211	1	ZDHHC18	1.04556
KPNA1	0.0900484	0.100344	0.218	0.114	1	KPNA1	1.04552
PPIH	0.0906611	0.134719	0.236	0.132	1	PPIH	1.04258
IDI1	0.0906757	0.205407	0.473	0.351	1	IDI1	1.04251
GOT2	0.0907119	0.121995	0.2	0.105	1	GOT2	1.04234
ACTG1	0.0908214	0.136651	1	0.974	1	ACTG1	1.04181
PANK2	0.090876	0.128271	0.327	0.193	1	PANK2	1.04155
GNAQ	0.0910453	0.0734626	0.2	0.096	1	GNAQ	1.04074
GAK	0.091072	-0.25733	0.127	0.228	1	GAK	1.04062
STAMBPL1	0.0910836	0.0877403	0.218	0.114	1	STAMBPL1	1.04056
TNRC18	0.0915852	0.199166	0.109	0.044	1	TNRC18	1.03817
ITCH	0.0916536	0.235079	0.236	0.132	1	ITCH	1.03785
SQLE	0.0917392	0.194252	0.182	0.096	1	SQLE	1.03744
SH2D1A	0.0918796	-0.298095	0.291	0.412	1	SH2D1A	1.03678
UNK	0.0918953	-0.193285	0.055	0.14	1	UNK	1.03671
RIT1	0.0920038	-0.244575	0.127	0.228	1	RIT1	1.03619
KLF3	0.0922303	0.0857071	0.182	0.088	1	KLF3	1.03513
OGFR	0.0926604	0.140885	0.345	0.211	1	OGFR	1.03311
EFL1	0.0927333	0.128895	0.127	0.053	1	EFL1	1.03276
CDCA7	0.0927333	0.125144	0.127	0.053	1	CDCA7	1.03276
PHF23	0.0927376	0.113028	0.273	0.149	1	PHF23	1.03274
STRIP1	0.0929494	0.0456174	0.145	0.061	1	STRIP1	1.03175
MOCS2	0.0932626	-0.270376	0.073	0.158	1	MOCS2	1.03029
MANF	0.0935688	0.194055	0.455	0.307	1	MANF	1.02887
MGST3	0.0937021	0.170594	0.491	0.333	1	MGST3	1.02825
SNHG9	0.0938536	0.22665	0.218	0.123	1	SNHG9	1.02755
TOR2A	0.094016	0.178811	0.182	0.096	1	TOR2A	1.0268
LRRC75A	0.0941521	0.101643	0.127	0.053	1	LRRC75A	1.02617
CLASP2	0.0941521	0.0967156	0.127	0.053	1	CLASP2	1.02617
HNRNPA1	0.0941928	0.162518	0.836	0.728	1	HNRNPA1	1.02598
AGPS	0.0942467	0.097678	0.218	0.114	1	AGPS	1.02573
TRDC	0.0943087	0.253505	0.927	0.912	1	TRDC	1.02545
NDFIP2	0.0944925	0.182799	0.382	0.237	1	NDFIP2	1.0246
GNG2	0.0944957	0.114012	0.473	0.316	1	GNG2	1.02459
MAPK14	0.094534	-0.196778	0.073	0.167	1	MAPK14	1.02441
TOPBP1	0.0945666	0.0895171	0.182	0.088	1	TOPBP1	1.02426
IFIT2	0.0946426	0.19764	0.109	0.044	1	IFIT2	1.02391
CCDC34	0.0946426	0.173037	0.109	0.044	1	CCDC34	1.02391
GGCT	0.0946836	0.116562	0.236	0.132	1	GGCT	1.02373
AIDA	0.094925	0.146993	0.164	0.079	1	AIDA	1.02262
SUCLG1	0.0953268	0.2067	0.364	0.246	1	SUCLG1	1.02078
CEMIP2	0.0954772	-0.320502	0.2	0.307	1	CEMIP2	1.0201
MAML1	0.0955231	-0.266734	0.073	0.158	1	MAML1	1.01989
TASP1	0.0955883	0.161354	0.127	0.053	1	TASP1	1.0196
DNAJC5	0.0956264	-0.215903	0.036	0.114	1	DNAJC5	1.01942
RBM41	0.0956488	0.150783	0.2	0.105	1	RBM41	1.01932
PPM1G	0.0956551	0.240652	0.6	0.43	1	PPM1G	1.01929
USB1	0.0957524	0.117184	0.182	0.088	1	USB1	1.01885
LIN7C	0.0957524	0.100102	0.182	0.088	1	LIN7C	1.01885
EIF2AK2	0.0958928	0.172176	0.364	0.219	1	EIF2AK2	1.01821
PTGER2	0.0960017	0.159267	0.382	0.246	1	PTGER2	1.01772
PTDSS1	0.0961713	0.133573	0.164	0.079	1	PTDSS1	1.01695
RSPRY1	0.0961713	0.116082	0.164	0.079	1	RSPRY1	1.01695
CD37	0.0962656	-0.180874	0.655	0.702	1	CD37	1.01653
DDT	0.0963923	0.18191	0.673	0.456	1	DDT	1.01596
SMIM29	0.0964039	0.133423	0.218	0.114	1	SMIM29	1.01591
SPCS2	0.0964315	-0.175548	0.673	0.719	1	SPCS2	1.01578
NSMCE1	0.0965535	-0.253159	0.182	0.289	1	NSMCE1	1.01523
DDB2	0.0969317	0.130573	0.255	0.14	1	DDB2	1.01353
VPS13B	0.0969879	0.0383166	0.145	0.061	1	VPS13B	1.01328
CCDC159	0.0974307	0.117495	0.164	0.079	1	CCDC159	1.0113
PSMD3	0.0975419	0.132861	0.309	0.193	1	PSMD3	1.01081
GNB2	0.0977707	0.152715	0.418	0.298	1	GNB2	1.00979
MED8	0.0977934	0.130649	0.236	0.132	1	MED8	1.00969
ACADVL	0.0980054	0.153092	0.345	0.219	1	ACADVL	1.00875
NFU1	0.0981597	0.082472	0.182	0.088	1	NFU1	1.00807
TMA7	0.0981963	-0.183581	0.836	0.912	1	TMA7	1.0079
PARP8	0.0983309	-0.240422	0.255	0.368	1	PARP8	1.00731
HCFC1	0.098484	0.191698	0.2	0.105	1	HCFC1	1.00663
DBF4	0.098484	0.144063	0.2	0.105	1	DBF4	1.00663
SPTSSA	0.098484	0.114133	0.2	0.105	1	SPTSSA	1.00663
C11orf68	0.0985999	0.0813964	0.273	0.149	1	C11orf68	1.00612
SLC30A9	0.0987033	0.1118	0.164	0.079	1	SLC30A9	1.00567
FAM122B	0.0987033	0.110615	0.164	0.079	1	FAM122B	1.00567
IMPDH1	0.0987426	0.129985	0.273	0.158	1	IMPDH1	1.0055
UQCRFS1	0.0988284	0.196439	0.491	0.351	1	UQCRFS1	1.00512
INPP1	0.0989958	0.055228	0.2	0.096	1	INPP1	1.00438
WDR1	0.0991491	0.212566	0.418	0.289	1	WDR1	1.00371
DUSP2	0.0993413	-0.118711	0.236	0.36	1	DUSP2	1.00287
MKI67	0.0993815	0.444728	0.109	0.044	1	MKI67	1.00269
ADK	0.0997573	-0.148121	0.036	0.114	1	ADK	1.00106
MMADHC	0.0997835	0.137354	0.345	0.219	1	MMADHC	1.00094
INPP4A	0.0998297	-0.322424	0.164	0.254	1	INPP4A	1.00074
PMVK	0.0999115	0.154202	0.236	0.132	1	PMVK	1.00038
BORCS5	0.100002	0.0689961	0.127	0.053	1	BORCS5	0.99999
SUPT7L	0.100615	0.0586605	0.182	0.088	1	SUPT7L	0.997337
FASN	0.101003	0.122662	0.109	0.044	1	FASN	0.995668
PIAS4	0.101003	0.0929899	0.109	0.044	1	PIAS4	0.995668
AMZ2	0.101201	0.214623	0.2	0.114	1	AMZ2	0.994814
HIGD1A	0.101274	0.141859	0.309	0.193	1	HIGD1A	0.994501
PGRMC2	0.101288	-0.263919	0.055	0.132	1	PGRMC2	0.994441
SSH1	0.101366	-0.217739	0.073	0.158	1	SSH1	0.994106
PLIN2	0.101421	0.196936	0.218	0.123	1	PLIN2	0.993871
TSPAN31	0.101421	-0.317413	0.091	0.184	1	TSPAN31	0.993871
BYSL	0.101509	0.0908965	0.127	0.053	1	BYSL	0.993495
BCL7C	0.101849	0.147593	0.473	0.342	1	BCL7C	0.992044
SENP7	0.101898	0.133715	0.4	0.263	1	SENP7	0.991832
BCL7B	0.101974	0.124111	0.2	0.105	1	BCL7B	0.991512
FLOT1	0.102056	0.160957	0.436	0.281	1	FLOT1	0.991163
PDPK1	0.102066	0.148579	0.236	0.132	1	PDPK1	0.991119
SLC9A3R1	0.102113	-0.198451	0.382	0.526	1	SLC9A3R1	0.99092
TMIGD2	0.102465	0.170332	0.6	0.439	1	TMIGD2	0.989423
SMC3	0.102606	0.251981	0.564	0.465	1	SMC3	0.988829
AL138724.1	0.102645	0.165485	0.109	0.044	1	AL138724.1	0.988664
HDHD5	0.102645	0.145683	0.109	0.044	1	HDHD5	0.988664
MCEE	0.102645	0.137633	0.109	0.044	1	MCEE	0.988664
WDFY2	0.103034	0.0508299	0.127	0.053	1	WDFY2	0.987019
SKP1	0.103174	-0.116986	0.909	0.833	1	SKP1	0.986429
APOL6	0.103192	0.20022	0.4	0.272	1	APOL6	0.986353
UFC1	0.103204	-0.237802	0.545	0.588	1	UFC1	0.986301
ARFGAP3	0.103332	-0.114678	0.164	0.298	1	ARFGAP3	0.985767
PDXDC1	0.103525	0.212978	0.2	0.114	1	PDXDC1	0.984956
P4HTM	0.103752	0.103443	0.182	0.088	1	P4HTM	0.984003
TSR1	0.103927	0.113034	0.164	0.079	1	TSR1	0.983273
FTL	0.104025	-0.10337	1	0.982	1	FTL	0.982864
CDC25B	0.10415	0.201006	0.145	0.07	1	CDC25B	0.982339
JPT1	0.104277	0.225224	0.473	0.342	1	JPT1	0.98181
ZMYM3	0.104308	0.158733	0.109	0.044	1	ZMYM3	0.981683
KYAT3	0.104308	0.147696	0.109	0.044	1	KYAT3	0.981683
SCRIB	0.104308	0.137314	0.109	0.044	1	SCRIB	0.981683
AC118549.1	0.104577	0.0962409	0.127	0.053	1	AC118549.1	0.980563
HACD3	0.104827	0.101396	0.273	0.158	1	HACD3	0.979526
VOPP1	0.105093	0.14849	0.255	0.149	1	VOPP1	0.978426
SLC39A3	0.105266	0.0677361	0.164	0.079	1	SLC39A3	0.97771
ADRM1	0.105369	0.103222	0.509	0.333	1	ADRM1	0.977287
FAM162A	0.105412	0.194385	0.291	0.175	1	FAM162A	0.977111
VPS26C	0.105412	0.113621	0.291	0.175	1	VPS26C	0.977111
TXNIP	0.105425	-0.191619	0.927	0.947	1	TXNIP	0.977055
GPS2	0.105622	-0.151106	0.055	0.14	1	GPS2	0.976244
PRKAG2	0.105673	0.0578616	0.182	0.088	1	PRKAG2	0.976038
S100PBP	0.10587	-0.264372	0.127	0.228	1	S100PBP	0.975228
RHOA	0.105944	0.197155	0.873	0.746	1	RHOA	0.974926
ZNF845	0.105992	0.138062	0.109	0.044	1	ZNF845	0.974726
PIDD1	0.105992	0.0958698	0.109	0.044	1	PIDD1	0.974726
ATP13A1	0.106243	-0.220499	0.073	0.158	1	ATP13A1	0.973699
CDK11A	0.106403	0.120888	0.255	0.14	1	CDK11A	0.973047
PRPF38A	0.106419	-0.181819	0.273	0.386	1	PRPF38A	0.972982
CHCHD5	0.106458	0.165298	0.364	0.237	1	CHCHD5	0.97282
CBR4	0.106474	0.181209	0.309	0.202	1	CBR4	0.972757
PUS3	0.10662	0.141863	0.164	0.079	1	PUS3	0.972163
CDV3	0.107028	0.200559	0.527	0.412	1	CDV3	0.970504
TSG101	0.107061	-0.314775	0.2	0.307	1	TSG101	0.970367
ANAPC11	0.107326	0.177036	0.582	0.439	1	ANAPC11	0.969294
CGAS	0.107359	0.164395	0.182	0.096	1	CGAS	0.96916
SLC25A53	0.107698	0.128167	0.109	0.044	1	SLC25A53	0.967791
SLC35B4	0.107698	0.114912	0.109	0.044	1	SLC35B4	0.967791
HNRNPA1P48	0.107698	0.106916	0.109	0.044	1	HNRNPA1P48	0.967791
NFE2L1	0.107698	0.0990996	0.109	0.044	1	NFE2L1	0.967791
FAM214A	0.107902	-0.205992	0.127	0.237	1	FAM214A	0.966969
CDC37L1	0.107987	0.136764	0.164	0.079	1	CDC37L1	0.96663
HNRNPUL2	0.107987	-0.195727	0.055	0.132	1	HNRNPUL2	0.96663
PHACTR4	0.108008	0.179809	0.2	0.105	1	PHACTR4	0.966545
SLAMF6	0.108008	0.113803	0.2	0.105	1	SLAMF6	0.966545
SEC14L1	0.108313	0.129194	0.364	0.237	1	SEC14L1	0.96532
SEC31A	0.108313	-0.245269	0.218	0.307	1	SEC31A	0.96532
DYNC1H1	0.108691	0.0658929	0.527	0.342	1	DYNC1H1	0.963807
ELAC2	0.10875	-0.205139	0.073	0.158	1	ELAC2	0.96357
USF2	0.108849	0.184541	0.491	0.333	1	USF2	0.963177
C11orf71	0.109171	0.161797	0.145	0.07	1	C11orf71	0.961895
CYREN	0.109171	0.160444	0.145	0.07	1	CYREN	0.961895
STARD9	0.109426	0.152919	0.109	0.044	1	STARD9	0.960879
SERTAD3	0.109426	0.14786	0.109	0.044	1	SERTAD3	0.960879
MMAB	0.109426	0.114567	0.109	0.044	1	MMAB	0.960879
GLMN	0.109429	0.289552	0.255	0.149	1	GLMN	0.960866
RPL39	0.109491	-0.102855	1	0.974	1	RPL39	0.960623
DBNL	0.109759	0.158188	0.509	0.342	1	DBNL	0.959559
GON7	0.1099	0.105353	0.236	0.132	1	GON7	0.959004
PATL2	0.10995	-0.117837	0.036	0.114	1	PATL2	0.958806
GTF3C1	0.110189	0.0666135	0.218	0.114	1	GTF3C1	0.957863
RABIF	0.110189	0.0516534	0.218	0.114	1	RABIF	0.957863
SLC25A33	0.110299	-0.232568	0.036	0.105	1	SLC25A33	0.957428
SRP72	0.110414	0.164006	0.436	0.325	1	SRP72	0.956977
BRF1	0.110639	0.143872	0.145	0.07	1	BRF1	0.956091
GALK2	0.110657	0.119258	0.218	0.123	1	GALK2	0.956022
LINC02001	0.110762	-0.203535	0.055	0.132	1	LINC02001	0.955611
PIGN	0.110934	0.0646262	0.127	0.053	1	PIGN	0.954935
ITPKB	0.111	-0.168156	0.055	0.14	1	ITPKB	0.954678
MRPS33	0.111104	0.163653	0.309	0.193	1	MRPS33	0.95427
ALDOC	0.111176	0.157872	0.109	0.044	1	ALDOC	0.95399
UTP14C	0.111176	0.126865	0.109	0.044	1	UTP14C	0.95399
PIGM	0.111176	0.122896	0.109	0.044	1	PIGM	0.95399
RFC3	0.111176	0.104351	0.109	0.044	1	RFC3	0.95399
SEC22A	0.111176	0.0714877	0.109	0.044	1	SEC22A	0.95399
EIF3J-DT	0.111196	-0.359471	0.182	0.272	1	EIF3J-DT	0.953911
TMEM199	0.111762	0.102731	0.2	0.105	1	TMEM199	0.951706
EML3	0.112123	0.189466	0.145	0.07	1	EML3	0.950304
SELENOO	0.112123	0.142645	0.145	0.07	1	SELENOO	0.950304
IRF9	0.112167	0.246404	0.273	0.167	1	IRF9	0.950133
IMMP1L	0.112171	0.0969432	0.164	0.079	1	IMMP1L	0.950119
SPG21	0.112171	-0.151576	0.055	0.132	1	SPG21	0.950119
C1GALT1C1	0.112223	0.140555	0.236	0.132	1	C1GALT1C1	0.949919
DVL3	0.112377	-0.113036	0.055	0.14	1	DVL3	0.949321
AC016831.7	0.112598	-0.206087	0.073	0.158	1	AC016831.7	0.948468
OAS3	0.112947	0.127253	0.109	0.044	1	OAS3	0.947124
ZNRD1	0.112955	-0.202594	0.291	0.412	1	ZNRD1	0.947094
EIF3J	0.112968	0.139557	0.382	0.246	1	EIF3J	0.947043
ITPA	0.113004	0.0745069	0.291	0.167	1	ITPA	0.946906
EMC6	0.113465	0.133271	0.473	0.316	1	EMC6	0.945138
EXOSC5	0.113594	0.124959	0.164	0.079	1	EXOSC5	0.944645
C12orf45	0.113594	-0.189759	0.055	0.132	1	C12orf45	0.944645
ATP6V1C1	0.113623	0.154637	0.145	0.07	1	ATP6V1C1	0.944532
SYK	0.113623	0.120239	0.145	0.07	1	SYK	0.944532
PKM	0.113634	0.28963	0.545	0.474	1	PKM	0.944493
SF3A1	0.113724	0.153097	0.291	0.175	1	SF3A1	0.944147
CHURC1	0.113733	-0.254953	0.364	0.465	1	CHURC1	0.944113
RALGAPA2	0.113769	0.286028	0.164	0.088	1	RALGAPA2	0.943978
SPTY2D1	0.113901	0.150861	0.182	0.096	1	SPTY2D1	0.943473
COX19	0.113906	0.201377	0.255	0.149	1	COX19	0.943454
GFOD1	0.11391	0.228807	0.236	0.14	1	GFOD1	0.943439
TPRKB	0.114195	0.150554	0.309	0.193	1	TPRKB	0.942351
IRF1	0.114266	0.10158	0.909	0.789	1	IRF1	0.942085
MIS12	0.114287	0.132073	0.218	0.123	1	MIS12	0.942004
ZSCAN18	0.114489	0.0780577	0.218	0.114	1	ZSCAN18	0.941235
SAMSN1	0.114576	-0.275847	0.364	0.456	1	SAMSN1	0.940906
GGPS1	0.114585	0.136724	0.236	0.132	1	GGPS1	0.940873
TEX30	0.114585	0.0858945	0.236	0.132	1	TEX30	0.940873
CROCC	0.114741	0.111952	0.109	0.044	1	CROCC	0.940281
AL117339.5	0.114741	0.0810076	0.109	0.044	1	AL117339.5	0.940281
SLC25A5	0.115028	0.137557	0.709	0.561	1	SLC25A5	0.939196
KIAA1191	0.115031	0.0944704	0.164	0.079	1	KIAA1191	0.939185
ATP10D	0.115031	-0.20164	0.055	0.132	1	ATP10D	0.939185
CST3	0.115074	0.212069	0.127	0.061	1	CST3	0.939025
SEC23B	0.115139	0.095075	0.145	0.07	1	SEC23B	0.938778
TMEM131L	0.115223	-0.227766	0.073	0.158	1	TMEM131L	0.938461
HELB	0.115626	0.0909254	0.273	0.158	1	HELB	0.936945
NFE2L3	0.115645	0.0653115	0.109	0.044	1	NFE2L3	0.936873
PRPF31	0.115955	0.112331	0.345	0.219	1	PRPF31	0.93571
RPL24	0.115959	-0.10111	1	0.982	1	RPL24	0.935695
LYRM4	0.116198	0.127019	0.255	0.149	1	LYRM4	0.934803
LPCAT1	0.116265	0.213319	0.236	0.14	1	LPCAT1	0.934551
LZTR1	0.116557	0.141095	0.109	0.044	1	LZTR1	0.933461
CEP97	0.116557	0.0785429	0.109	0.044	1	CEP97	0.933461
SAC3D1	0.116557	0.0660738	0.109	0.044	1	SAC3D1	0.933461
ARID4B	0.116589	-0.264253	0.545	0.614	1	ARID4B	0.933343
KCTD17	0.116671	0.132943	0.145	0.07	1	KCTD17	0.933039
TMEM9	0.116671	0.131901	0.145	0.07	1	TMEM9	0.933039
LIMD1	0.116701	-0.203008	0.036	0.105	1	LIMD1	0.932927
ANKRD10	0.117887	-0.189273	0.127	0.228	1	ANKRD10	0.928534
MRPL11	0.118015	0.101327	0.455	0.316	1	MRPL11	0.928063
GPI	0.118201	0.0793357	0.236	0.132	1	GPI	0.92738
TESC	0.118218	0.134677	0.145	0.07	1	TESC	0.927316
ABRAXAS2	0.118218	0.11425	0.145	0.07	1	ABRAXAS2	0.927316
C1orf52	0.11828	0.0757332	0.218	0.114	1	C1orf52	0.927088
KLF2	0.118281	-0.390875	0.091	0.175	1	KLF2	0.927085
COASY	0.118346	-0.235625	0.036	0.105	1	COASY	0.926847
TMEM87B	0.118396	0.0826261	0.109	0.044	1	TMEM87B	0.926664
PWWP2B	0.118396	0.0721335	0.109	0.044	1	PWWP2B	0.926664
NLRX1	0.118396	0.0616131	0.109	0.044	1	NLRX1	0.926664
KDM5A	0.118473	-0.306857	0.382	0.456	1	KDM5A	0.926381
COMMD9	0.119357	0.14649	0.182	0.096	1	COMMD9	0.923153
PAN3	0.119428	0.0892482	0.164	0.079	1	PAN3	0.922893
NQO2	0.119428	-0.196711	0.055	0.132	1	NQO2	0.922893
GIGYF1	0.119578	0.116309	0.2	0.105	1	GIGYF1	0.922348
EDEM2	0.119782	0.133848	0.145	0.07	1	EDEM2	0.92161
PNKD	0.119922	-0.25217	0.2	0.298	1	PNKD	0.9211
PLA2G16	0.119963	0.166257	0.582	0.412	1	PLA2G16	0.920954
TSPAN32	0.120009	-0.188418	0.036	0.105	1	TSPAN32	0.920786
MRPS25	0.120213	0.0826383	0.218	0.114	1	MRPS25	0.920049
ERVK3-1	0.120257	0.11886	0.109	0.044	1	ERVK3-1	0.91989
SKIV2L	0.120257	0.110506	0.109	0.044	1	SKIV2L	0.91989
TRAPPC13	0.120257	0.103313	0.109	0.044	1	TRAPPC13	0.91989
INSIG1	0.120257	0.0648334	0.109	0.044	1	INSIG1	0.91989
TOP3A	0.120257	0.055922	0.109	0.044	1	TOP3A	0.91989
TANK	0.120334	-0.24447	0.236	0.333	1	TANK	0.91961
DNAJC2	0.120754	-0.208114	0.2	0.307	1	DNAJC2	0.9181
DCTN5	0.120921	0.0888634	0.2	0.105	1	DCTN5	0.917497
HEBP1	0.120923	0.127629	0.164	0.079	1	HEBP1	0.917492
PSAP	0.121085	0.165593	0.345	0.219	1	PSAP	0.916911
HIBCH	0.121096	0.166089	0.273	0.167	1	HIBCH	0.916871
PABPN1	0.121323	0.109576	0.527	0.342	1	PABPN1	0.916059
C16orf72	0.121344	-0.25103	0.127	0.228	1	C16orf72	0.915982
PDK3	0.121361	0.127917	0.145	0.07	1	PDK3	0.91592
ACAD8	0.121361	0.115842	0.145	0.07	1	ACAD8	0.91592
XPC	0.121413	-0.239387	0.145	0.246	1	XPC	0.915734
MAPKAPK5-AS1	0.121486	-0.277864	0.127	0.211	1	MAPKAPK5-AS1	0.915472
RPA2	0.121524	0.143541	0.509	0.368	1	RPA2	0.915338
TGS1	0.121569	0.0902314	0.327	0.202	1	TGS1	0.915179
NDUFAF3	0.121624	0.149236	0.491	0.351	1	NDUFAF3	0.914981
MXRA7	0.121827	-0.215734	0.091	0.184	1	MXRA7	0.914256
JHY	0.122141	0.193536	0.109	0.044	1	JHY	0.913139
GIN1	0.122141	0.0536282	0.109	0.044	1	GIN1	0.913139
FUOM	0.122327	0.198331	0.2	0.114	1	FUOM	0.912479
FBXW4	0.122432	0.0561691	0.164	0.079	1	FBXW4	0.912105
POLR1C	0.122432	-0.195396	0.055	0.132	1	POLR1C	0.912105
SERINC1	0.122534	-0.340237	0.218	0.307	1	SERINC1	0.911744
SNRPG	0.122666	0.141155	0.6	0.474	1	SNRPG	0.911275
STX8	0.123185	0.193095	0.327	0.228	1	STX8	0.909441
FNTA	0.123347	0.0683375	0.4	0.246	1	FNTA	0.908873
DPH7	0.123386	-0.168815	0.073	0.158	1	DPH7	0.908734
IFNAR2	0.123413	0.12987	0.273	0.167	1	IFNAR2	0.908641
BOD1L1	0.123453	0.0949849	0.691	0.518	1	BOD1L1	0.908497
ANGEL2	0.123581	0.142196	0.182	0.096	1	ANGEL2	0.908047
MT-ND3	0.123949	-0.0915253	1	1	1	MT-ND3	0.906758
UCKL1	0.123955	0.0749745	0.164	0.079	1	UCKL1	0.906736
ELMOD3	0.123956	-0.159312	0.055	0.132	1	ELMOD3	0.906733
SPDL1	0.124048	0.0664285	0.109	0.044	1	SPDL1	0.90641
GNB1	0.124151	0.135807	0.418	0.281	1	GNB1	0.906049
SLC52A2	0.124511	0.208018	0.218	0.132	1	SLC52A2	0.904793
MCM4	0.124569	0.148926	0.145	0.07	1	MCM4	0.904589
YEATS2	0.124569	0.0734718	0.145	0.07	1	YEATS2	0.904589
RPLP2	0.124771	-0.103453	1	0.991	1	RPLP2	0.903887
CTNNBIP1	0.125015	0.141563	0.182	0.096	1	CTNNBIP1	0.903037
NUP155	0.125015	0.0963314	0.182	0.096	1	NUP155	0.903037
EEF2	0.125098	-0.229089	0.727	0.702	1	EEF2	0.90275
MIIP	0.125109	-0.181087	0.036	0.105	1	MIIP	0.902712
NUDT1	0.125145	0.146358	0.345	0.228	1	NUDT1	0.902586
PNRC2	0.125346	-0.324771	0.236	0.333	1	PNRC2	0.901889
TIPIN	0.125495	0.050862	0.164	0.079	1	TIPIN	0.901375
GPR18	0.125729	0.100493	0.255	0.149	1	GPR18	0.900566
HEATR5B	0.125978	0.0373629	0.109	0.044	1	HEATR5B	0.899704
NCK1	0.126265	0.197167	0.382	0.272	1	NCK1	0.898716
ATF4	0.126321	0.164549	0.364	0.246	1	ATF4	0.898525
CD9	0.12639	0.0379266	0.345	0.219	1	CD9	0.898288
LYRM7	0.126906	0.186402	0.164	0.088	1	LYRM7	0.896519
ITFG2	0.126986	0.0453675	0.236	0.132	1	ITFG2	0.896245
RBM4	0.126986	-0.261173	0.109	0.193	1	RBM4	0.896245
ENO1	0.127019	0.212165	0.782	0.658	1	ENO1	0.896132
FUT11	0.127048	-0.179812	0.055	0.132	1	FUT11	0.896032
GUSB	0.127461	0.180838	0.309	0.202	1	GUSB	0.894623
PDE4D	0.127699	0.180622	0.273	0.175	1	PDE4D	0.893813
RAC1	0.127812	0.108378	0.709	0.596	1	RAC1	0.893428
NOL12	0.127843	0.0592233	0.145	0.07	1	NOL12	0.893322
MKRN1	0.12815	0.113908	0.273	0.167	1	MKRN1	0.892282
PTPN11	0.128204	0.103206	0.255	0.149	1	PTPN11	0.892098
XBP1	0.128255	0.290805	0.473	0.342	1	XBP1	0.891924
ERGIC2	0.12832	0.168322	0.418	0.289	1	ERGIC2	0.891705
SQOR	0.128428	0.182701	0.218	0.132	1	SQOR	0.89134
EPHA4	0.128436	0.183213	0.164	0.088	1	EPHA4	0.891315
TACO1	0.128436	0.126853	0.164	0.088	1	TACO1	0.891315
CA5B	0.128601	-0.139333	0.036	0.105	1	CA5B	0.890754
AC012360.3	0.128601	-0.156788	0.036	0.105	1	AC012360.3	0.890754
SNX1	0.12862	0.134296	0.236	0.14	1	SNX1	0.890693
SRSF10	0.12926	0.16222	0.582	0.43	1	SRSF10	0.888537
SERTAD2	0.129395	-0.212092	0.073	0.149	1	SERTAD2	0.888084
MRPS31	0.129486	0.0425673	0.291	0.167	1	MRPS31	0.887777
LARP1	0.129526	0.0788169	0.309	0.193	1	LARP1	0.887643
ENTR1	0.129751	0.116716	0.218	0.123	1	ENTR1	0.886889
PRCP	0.130376	0.14972	0.127	0.061	1	PRCP	0.884802
GHDC	0.130376	-0.133099	0.036	0.105	1	GHDC	0.884802
SELENOS	0.130426	0.118895	0.473	0.307	1	SELENOS	0.884635
PPP4R3A	0.130543	0.145472	0.345	0.228	1	PPP4R3A	0.884245
PHF21A	0.130556	0.188302	0.2	0.114	1	PHF21A	0.884203
RWDD4	0.130717	0.102141	0.255	0.149	1	RWDD4	0.883667
SMNDC1	0.131213	0.148697	0.255	0.158	1	SMNDC1	0.882023
TIMM10	0.131292	0.160499	0.273	0.175	1	TIMM10	0.881761
ISG15	0.131421	0.26789	0.727	0.553	1	ISG15	0.881334
ALG13	0.131537	-0.260675	0.182	0.272	1	ALG13	0.880951
RGS10	0.13177	-0.228051	0.364	0.456	1	RGS10	0.880185
IFI16	0.131888	0.169392	0.8	0.693	1	IFI16	0.879794
WDR46	0.13189	0.201688	0.273	0.184	1	WDR46	0.879788
BCAT2	0.131909	0.0206653	0.109	0.044	1	BCAT2	0.879724
EXOC7	0.13207	-0.188533	0.2	0.316	1	EXOC7	0.879197
CEP89	0.132169	0.151665	0.127	0.061	1	CEP89	0.878869
CERS6	0.132169	-0.124036	0.036	0.105	1	CERS6	0.878869
RNF38	0.132169	-0.151955	0.036	0.105	1	RNF38	0.878869
POLR2L	0.132406	0.160779	0.691	0.509	1	POLR2L	0.878093
TDG	0.132479	0.0867067	0.218	0.123	1	TDG	0.877852
ATOX1	0.132595	0.221501	0.327	0.219	1	ATOX1	0.877474
MAP3K13	0.132678	0.173515	0.2	0.114	1	MAP3K13	0.8772
HACL1	0.132879	0.0653844	0.145	0.07	1	HACL1	0.876543
ARHGAP18	0.132968	0.195339	0.291	0.184	1	ARHGAP18	0.876252
ARL6IP1	0.13316	0.26572	0.327	0.219	1	ARL6IP1	0.875627
ABI2	0.133177	-0.208723	0.109	0.202	1	ABI2	0.875571
CCT4	0.133236	0.169238	0.491	0.386	1	CCT4	0.875378
PPIP5K2	0.13325	-0.341059	0.2	0.272	1	PPIP5K2	0.875332
PCBP1	0.133267	0.142234	0.8	0.632	1	PCBP1	0.875276
DOCK2	0.133836	0.0539009	0.327	0.202	1	DOCK2	0.873426
H2AFZ	0.13394	0.408663	0.782	0.658	1	H2AFZ	0.873089
ZNF217	0.134238	-0.247871	0.236	0.333	1	ZNF217	0.872125
FBXL6	0.134592	0.0813304	0.145	0.07	1	FBXL6	0.870982
YKT6	0.134592	0.0641536	0.145	0.07	1	YKT6	0.870982
KCNAB2	0.135016	0.201984	0.255	0.158	1	KCNAB2	0.869614
EIF2S3	0.135312	0.0659449	0.491	0.342	1	EIF2S3	0.868662
PPP1R11	0.135519	0.0953165	0.273	0.167	1	PPP1R11	0.868
COPS2	0.135534	0.0948336	0.291	0.175	1	COPS2	0.867952
PDHB	0.135552	-0.200236	0.182	0.281	1	PDHB	0.867895
MRPL57	0.135631	0.159492	0.6	0.491	1	MRPL57	0.867641
HTT	0.135749	0.0148234	0.2	0.105	1	HTT	0.867264
SLC25A11	0.136143	0.164414	0.436	0.307	1	SLC25A11	0.866005
CCDC92	0.1363	0.153542	0.164	0.088	1	CCDC92	0.865503
TMEM161B-AS1	0.1363	0.139977	0.164	0.088	1	TMEM161B-AS1	0.865503
POLL	0.136321	0.0786419	0.145	0.07	1	POLL	0.865437
TMEM181	0.136321	0.0609116	0.145	0.07	1	TMEM181	0.865437
SNHG8	0.136332	-0.247305	0.309	0.395	1	SNHG8	0.865401
FAM204A	0.13643	-0.175046	0.255	0.36	1	FAM204A	0.865089
DNPH1	0.136575	0.168733	0.564	0.43	1	DNPH1	0.864629
PSMC3	0.136661	0.20324	0.436	0.307	1	PSMC3	0.864354
TRIM44	0.136688	-0.219276	0.2	0.298	1	TRIM44	0.86427
ZCCHC9	0.136779	0.124707	0.273	0.167	1	ZCCHC9	0.863982
COPE	0.136993	0.188257	0.782	0.623	1	COPE	0.863302
DPP7	0.137054	-0.245899	0.436	0.491	1	DPP7	0.863108
RAE1	0.137288	-0.185804	0.091	0.175	1	RAE1	0.862367
C1orf123	0.137288	-0.189143	0.091	0.175	1	C1orf123	0.862367
STAT6	0.137737	0.14226	0.2	0.114	1	STAT6	0.860951
CORO1B	0.137858	0.198971	0.236	0.14	1	CORO1B	0.860567
STIP1	0.137884	0.123224	0.327	0.211	1	STIP1	0.860487
CSKMT	0.138067	0.0926677	0.145	0.07	1	CSKMT	0.859909
TPGS1	0.138402	-0.231751	0.2	0.298	1	TPGS1	0.858856
RBM8A	0.138496	0.209308	0.727	0.623	1	RBM8A	0.858562
SELENOT	0.138498	0.0918773	0.636	0.465	1	SELENOT	0.858555
PFKP	0.13851	0.102713	0.182	0.096	1	PFKP	0.858519
KPNA4	0.138587	0.179661	0.382	0.263	1	KPNA4	0.858276
C11orf58	0.138732	-0.173064	0.691	0.711	1	C11orf58	0.857822
NARS	0.139139	0.0609498	0.4	0.254	1	NARS	0.856552
PDZD11	0.139149	0.0892454	0.255	0.149	1	PDZD11	0.85652
TRIB2	0.139219	0.180614	0.236	0.14	1	TRIB2	0.856301
GPR68	0.139346	-0.190022	0.145	0.237	1	GPR68	0.855905
ZAP70	0.139468	0.161139	0.4	0.281	1	ZAP70	0.855527
CCDC152	0.139535	0.17128	0.127	0.061	1	CCDC152	0.855317
DHRS4-AS1	0.139535	0.130142	0.127	0.061	1	DHRS4-AS1	0.855317
PSMD9	0.139535	0.127433	0.127	0.061	1	PSMD9	0.855317
CARS	0.139548	0.118148	0.164	0.088	1	CARS	0.855275
ODR4	0.139831	0.0473277	0.145	0.07	1	ODR4	0.854396
BOD1	0.140135	-0.256482	0.055	0.123	1	BOD1	0.853454
TMEM223	0.140247	0.179684	0.327	0.211	1	TMEM223	0.853107
API5	0.1403	0.124133	0.291	0.184	1	API5	0.852942
PARVG	0.140304	0.12373	0.309	0.202	1	PARVG	0.852931
JAKMIP2	0.14059	0.0922062	0.236	0.14	1	JAKMIP2	0.852046
MED31	0.140755	0.171068	0.218	0.132	1	MED31	0.851535
AOAH	0.140818	-0.214181	0.491	0.579	1	AOAH	0.851343
FUS	0.141097	0.175228	0.855	0.754	1	FUS	0.850481
ASB1	0.141195	0.197156	0.164	0.088	1	ASB1	0.850182
TBC1D10C	0.141617	-0.144791	0.491	0.623	1	TBC1D10C	0.848884
CNOT3	0.141656	0.0752613	0.182	0.096	1	CNOT3	0.848765
MRPL51	0.141717	0.149757	0.709	0.632	1	MRPL51	0.848578
CRNKL1	0.141807	-0.190826	0.109	0.193	1	CRNKL1	0.848302
ZNF677	0.141807	-0.21769	0.109	0.193	1	ZNF677	0.848302
MTA1	0.141807	-0.230168	0.109	0.193	1	MTA1	0.848302
TMPO	0.142438	0.269242	0.455	0.36	1	TMPO	0.846375
RDX	0.142464	-0.256629	0.2	0.281	1	RDX	0.846296
GPR82	0.142471	0.177285	0.291	0.193	1	GPR82	0.846274
TRAPPC2L	0.142644	0.121001	0.382	0.254	1	TRAPPC2L	0.845746
BATF	0.142742	0.16345	0.309	0.202	1	BATF	0.845448
ZNF394	0.142742	0.130281	0.309	0.202	1	ZNF394	0.845448
ATG12	0.142753	0.115792	0.4	0.281	1	ATG12	0.845413
PPP4R3B	0.142819	0.0798216	0.4	0.263	1	PPP4R3B	0.845215
TTC38	0.14313	0.137965	0.2	0.123	1	TTC38	0.844269
NOL10	0.143623	-0.186415	0.055	0.123	1	NOL10	0.842777
GPN3	0.143697	0.149801	0.2	0.114	1	GPN3	0.842552
NSL1	0.143724	-0.194905	0.164	0.254	1	NSL1	0.842469
BRD3	0.143838	0.185006	0.273	0.175	1	BRD3	0.842126
TRNAU1AP	0.144176	0.152965	0.382	0.263	1	TRNAU1AP	0.841107
CHM	0.14422	-0.227122	0.127	0.219	1	CHM	0.840973
EPB41	0.14422	-0.180234	0.4	0.5	1	EPB41	0.840973
CTBS	0.144221	0.151555	0.255	0.158	1	CTBS	0.840972
ME2	0.144402	-0.292862	0.218	0.298	1	ME2	0.840427
YIPF3	0.144523	0.179458	0.291	0.202	1	YIPF3	0.840063
SRP19	0.144534	0.0985527	0.527	0.386	1	SRP19	0.840031
ABHD17B	0.14462	-0.177748	0.091	0.175	1	ABHD17B	0.839771
BBX	0.144753	0.243873	0.491	0.377	1	BBX	0.839374
MAVS	0.145061	0.207964	0.218	0.132	1	MAVS	0.838451
METAP2	0.145095	0.249351	0.345	0.254	1	METAP2	0.838349
HNRNPUL1	0.145213	0.168571	0.309	0.202	1	HNRNPUL1	0.837995
MAP3K7	0.145226	0.0425298	0.145	0.07	1	MAP3K7	0.837955
MBP	0.145242	-0.188897	0.764	0.798	1	MBP	0.837907
PTRH1	0.145263	0.139861	0.127	0.061	1	PTRH1	0.837844
OSBPL2	0.145263	0.0939783	0.127	0.061	1	OSBPL2	0.837844
ZNF397	0.14547	-0.205402	0.109	0.202	1	ZNF397	0.837227
NAP1L1	0.146113	0.193037	0.655	0.5	1	NAP1L1	0.83531
SAMD9	0.146113	-0.252698	0.509	0.57	1	SAMD9	0.83531
RAB37	0.146176	-0.176476	0.2	0.307	1	RAB37	0.835123
MAPK1	0.146286	0.143285	0.618	0.439	1	MAPK1	0.834797
ACP1	0.14631	0.12493	0.455	0.325	1	ACP1	0.834726
SARAF	0.146418	-0.264273	0.818	0.816	1	SARAF	0.834405
GEMIN6	0.146478	0.0676669	0.182	0.096	1	GEMIN6	0.834229
CDK17	0.146478	-0.207019	0.073	0.149	1	CDK17	0.834229
GIMAP2	0.146813	0.0425431	0.527	0.342	1	GIMAP2	0.833236
ABHD8	0.146877	-0.135241	0.055	0.132	1	ABHD8	0.833046
SLFN5	0.147048	-0.233008	0.764	0.772	1	SLFN5	0.832541
XKR8	0.147212	0.130995	0.127	0.061	1	XKR8	0.832056
B4GALT7	0.147212	0.124327	0.127	0.061	1	B4GALT7	0.832056
CLINT1	0.147362	-0.288851	0.273	0.351	1	CLINT1	0.831614
DPY30	0.147441	0.160167	0.418	0.289	1	DPY30	0.831381
TXNRD1	0.147524	0.206835	0.236	0.149	1	TXNRD1	0.831137
CHD2	0.147914	-0.191924	0.291	0.377	1	CHD2	0.829992
CTSB	0.147929	0.094633	0.164	0.088	1	CTSB	0.829946
UBE2J1	0.148112	-0.175029	0.073	0.149	1	UBE2J1	0.829409
AGFG1	0.148242	0.205044	0.273	0.184	1	AGFG1	0.829028
RPA3	0.148629	0.119118	0.364	0.237	1	RPA3	0.827896
COMMD1	0.148938	0.168282	0.236	0.149	1	COMMD1	0.826996
ST6GAL1	0.148979	-0.156019	0.055	0.123	1	ST6GAL1	0.826876
CASD1	0.148979	-0.175671	0.055	0.123	1	CASD1	0.826876
ZNF100	0.149181	0.122184	0.127	0.061	1	ZNF100	0.826286
CPOX	0.149181	0.115079	0.127	0.061	1	CPOX	0.826286
AL645568.1	0.149181	0.109786	0.127	0.061	1	AL645568.1	0.826286
SEC24C	0.149181	0.078113	0.127	0.061	1	SEC24C	0.826286
PSMB6	0.149223	0.117698	0.618	0.474	1	PSMB6	0.826164
FBXO33	0.14965	0.111117	0.164	0.088	1	FBXO33	0.824924
PTPA	0.14965	0.156018	0.164	0.088	1	PTPA	0.824922
SLC25A3	0.149742	0.146839	0.855	0.684	1	SLC25A3	0.824657
CUL5	0.149775	-0.216836	0.145	0.237	1	CUL5	0.82456
OXSR1	0.149854	0.105894	0.2	0.114	1	OXSR1	0.824333
EID2	0.149886	0.174356	0.145	0.079	1	EID2	0.824239
RER1	0.149903	0.17215	0.545	0.412	1	RER1	0.82419
ATP5F1C	0.149967	0.164554	0.564	0.43	1	ATP5F1C	0.824005
RAN	0.149985	0.22719	0.818	0.711	1	RAN	0.823951
BANF1	0.150558	0.148207	0.636	0.509	1	BANF1	0.822295
PLXNC1	0.150779	0.030178	0.145	0.07	1	PLXNC1	0.821659
MCPH1	0.150957	0.144532	0.218	0.132	1	MCPH1	0.821147
FUNDC2	0.150957	-0.268041	0.109	0.184	1	FUNDC2	0.821147
MZF1	0.15117	0.137119	0.127	0.061	1	MZF1	0.820534
IGFBP2	0.15117	0.0800452	0.127	0.061	1	IGFBP2	0.820534
ZFP91	0.151424	0.0720669	0.2	0.114	1	ZFP91	0.819806
SAMHD1	0.151469	0.0328967	0.455	0.316	1	SAMHD1	0.819675
CDK9	0.152178	0.16867	0.291	0.202	1	CDK9	0.817647
BTBD1	0.152248	0.196219	0.2	0.123	1	BTBD1	0.817447
BZW2	0.152459	0.120023	0.218	0.132	1	BZW2	0.816846
PPP1R18	0.152524	0.106682	0.727	0.553	1	PPP1R18	0.816662
EXOSC1	0.152702	-0.275344	0.236	0.316	1	EXOSC1	0.816154
GZMA	0.15288	0.285763	0.8	0.719	1	GZMA	0.81565
XPO6	0.1531	0.0668263	0.182	0.096	1	XPO6	0.815024
ZHX1	0.153139	0.0992008	0.164	0.088	1	ZHX1	0.814914
POC1B	0.153139	0.0819266	0.164	0.088	1	POC1B	0.814914
CBWD5	0.153139	0.0660287	0.164	0.088	1	CBWD5	0.814914
WSB2	0.153179	0.0935868	0.127	0.061	1	WSB2	0.8148
ZFAND2A	0.153179	0.0841602	0.127	0.061	1	ZFAND2A	0.8148
NDUFA5	0.153453	0.11034	0.455	0.325	1	NDUFA5	0.814025
BTG3	0.153899	0.161596	0.255	0.158	1	BTG3	0.812763
GCSH	0.153973	0.117871	0.218	0.132	1	GCSH	0.812556
ADAM28	0.153984	-0.251912	0.145	0.228	1	ADAM28	0.812525
EOMES	0.154083	-0.170876	0.273	0.386	1	EOMES	0.812245
BAZ1B	0.154235	0.0319482	0.418	0.281	1	BAZ1B	0.811816
TMEM208	0.154277	0.17641	0.418	0.289	1	TMEM208	0.811699
YME1L1	0.154409	0.0975574	0.345	0.219	1	YME1L1	0.811329
MTRF1L	0.154486	-0.179953	0.055	0.123	1	MTRF1L	0.811111
BAZ1A	0.154568	0.120491	0.4	0.272	1	BAZ1A	0.810879
LIMS1	0.154693	-0.297585	0.218	0.307	1	LIMS1	0.81053
COPS9	0.154839	0.0958559	0.564	0.412	1	COPS9	0.810119
ZMAT2	0.155037	0.117234	0.491	0.325	1	ZMAT2	0.809565
CD52	0.15506	-0.185879	0.8	0.868	1	CD52	0.8095
CAPZB	0.155102	0.181347	0.709	0.57	1	CAPZB	0.809382
PGAM1	0.155138	0.0459502	0.473	0.316	1	PGAM1	0.809282
GIT2	0.155208	0.13966	0.273	0.175	1	GIT2	0.809087
CAPN10	0.155209	0.144005	0.127	0.061	1	CAPN10	0.809084
ZFYVE21	0.155209	0.113421	0.127	0.061	1	ZFYVE21	0.809084
GTF2IRD2	0.155209	0.109545	0.127	0.061	1	GTF2IRD2	0.809084
RGL4	0.155321	0.136679	0.255	0.158	1	RGL4	0.808769
C4orf48	0.15539	0.13056	0.291	0.193	1	C4orf48	0.808576
PCLAF	0.155419	0.369078	0.145	0.079	1	PCLAF	0.808497
APPL2	0.155419	0.176328	0.145	0.079	1	APPL2	0.808497
FEZ2	0.155442	-0.245133	0.073	0.14	1	FEZ2	0.808432
AKT1	0.155458	0.111631	0.309	0.193	1	AKT1	0.808388
TNFRSF9	0.155471	0.365794	0.109	0.053	1	TNFRSF9	0.808351
ZNF644	0.155869	0.0855668	0.382	0.263	1	ZNF644	0.80724
MEA1	0.156371	0.211876	0.309	0.219	1	MEA1	0.805843
TMEM258	0.156422	-0.15125	0.509	0.579	1	TMEM258	0.805701
TTPAL	0.156496	0.0399583	0.182	0.096	1	TTPAL	0.805497
PHRF1	0.156689	0.106786	0.164	0.088	1	PHRF1	0.804962
SMS	0.156739	0.0828769	0.309	0.202	1	SMS	0.804823
ASNSD1	0.156784	0.0379206	0.309	0.193	1	ASNSD1	0.804697
PCMT1	0.156945	0.126279	0.4	0.272	1	PCMT1	0.804252
IL32	0.156959	0.201583	0.764	0.632	1	IL32	0.804215
ZFX	0.157077	0.100774	0.382	0.263	1	ZFX	0.803888
PSMF1	0.157248	0.0846236	0.291	0.184	1	PSMF1	0.803416
POGK	0.157258	0.101419	0.127	0.061	1	POGK	0.803387
UVRAG	0.15783	-0.240983	0.091	0.167	1	UVRAG	0.801811
ZSCAN16-AS1	0.157923	-0.193085	0.109	0.193	1	ZSCAN16-AS1	0.801556
FBXO3	0.157923	-0.199081	0.109	0.193	1	FBXO3	0.801556
TSSC4	0.158119	-0.179956	0.164	0.263	1	TSSC4	0.801016
ALDH9A1	0.158195	0.100469	0.255	0.158	1	ALDH9A1	0.800807
TCF25	0.158218	0.123883	0.655	0.474	1	TCF25	0.800744
GOLGA1	0.158243	-0.183414	0.055	0.123	1	GOLGA1	0.800677
CRTC3	0.158253	-0.236034	0.145	0.219	1	CRTC3	0.800647
RPS11	0.158272	0.105287	1	0.991	1	RPS11	0.800596
RALBP1	0.1585	-0.289828	0.309	0.377	1	RALBP1	0.799971
MLYCD	0.158582	0.153731	0.218	0.132	1	MLYCD	0.799746
ARMC10	0.158582	0.123416	0.218	0.132	1	ARMC10	0.799746
SPTLC2	0.158613	0.138776	0.291	0.184	1	SPTLC2	0.799661
LINC01934	0.158726	-0.24396	0.127	0.211	1	LINC01934	0.799351
DDIT4	0.158985	-0.137006	0.309	0.412	1	DDIT4	0.798645
UBXN4	0.159214	0.12137	0.727	0.57	1	UBXN4	0.798018
DCTPP1	0.159226	0.199328	0.309	0.211	1	DCTPP1	0.797985
CEP57L1	0.159328	0.0695723	0.127	0.061	1	CEP57L1	0.797707
CALCOCO1	0.159454	-0.199815	0.109	0.193	1	CALCOCO1	0.797365
TRIM69	0.159463	0.0795954	0.2	0.114	1	TRIM69	0.797341
GNL1	0.159463	0.0711502	0.2	0.114	1	GNL1	0.797341
WDR18	0.159688	0.105858	0.255	0.167	1	WDR18	0.796727
DKC1	0.159698	0.172519	0.345	0.237	1	DKC1	0.7967
CENPB	0.160142	0.130378	0.218	0.132	1	CENPB	0.795496
GNPTG	0.160147	-0.155856	0.055	0.123	1	GNPTG	0.795482
N4BP2L2	0.160309	-0.182695	0.818	0.842	1	N4BP2L2	0.795042
ARHGEF6	0.160587	0.135435	0.327	0.219	1	ARHGEF6	0.79429
C1orf56	0.1607	-0.298805	0.327	0.404	1	C1orf56	0.793984
LEO1	0.160731	0.117921	0.309	0.202	1	LEO1	0.7939
LMNB1	0.160889	0.105031	0.236	0.14	1	LMNB1	0.793474
RRP15	0.161105	0.145324	0.145	0.079	1	RRP15	0.792891
HSPB1	0.161109	0.0455964	0.2	0.114	1	HSPB1	0.792881
RPL5	0.161261	-0.0792071	1	1	1	RPL5	0.79247
CFAP298	0.161606	0.0794457	0.327	0.211	1	CFAP298	0.791544
LTBP3	0.161802	-0.139666	0.091	0.175	1	LTBP3	0.791015
HLA-DMB	0.162068	-0.14144	0.055	0.123	1	HLA-DMB	0.790303
RPS18	0.162268	-0.101784	1	1	1	RPS18	0.789768
METTL18	0.16255	-0.19438	0.109	0.193	1	METTL18	0.789014
EIF5A	0.162692	0.117784	0.691	0.57	1	EIF5A	0.788633
CNOT11	0.162767	0.0814515	0.2	0.114	1	CNOT11	0.788433
G3BP1	0.162916	0.125279	0.436	0.325	1	G3BP1	0.788037
KDM3B	0.163035	0.146382	0.145	0.079	1	KDM3B	0.787719
RNPC3	0.163458	0.0470578	0.182	0.096	1	RNPC3	0.786593
ZNF672	0.16353	0.0887063	0.127	0.061	1	ZNF672	0.786402
NT5DC2	0.16353	0.0787346	0.127	0.061	1	NT5DC2	0.786402
PACS2	0.16353	0.0583414	0.127	0.061	1	PACS2	0.786402
PRDX3	0.163558	0.119575	0.291	0.193	1	PRDX3	0.786329
MRPL50	0.163558	-0.203001	0.164	0.254	1	MRPL50	0.786328
MPHOSPH9	0.163645	0.134124	0.236	0.149	1	MPHOSPH9	0.786098
APPBP2	0.163976	0.0579928	0.164	0.088	1	APPBP2	0.785221
GABPA	0.164007	-0.150769	0.055	0.123	1	GABPA	0.785139
ERO1B	0.164007	-0.160344	0.055	0.123	1	ERO1B	0.785139
RPS19BP1	0.164189	0.103789	0.636	0.474	1	RPS19BP1	0.784657
UBC	0.164293	0.0754216	1	0.974	1	UBC	0.784382
METTL4	0.164439	-0.197851	0.091	0.167	1	METTL4	0.783996
ZNF562	0.164938	0.100114	0.182	0.105	1	ZNF562	0.78268
DRAP1	0.165119	0.164327	0.745	0.64	1	DRAP1	0.782202
NAA15	0.165443	0.0441529	0.255	0.149	1	NAA15	0.781352
ALAS1	0.165662	0.0771708	0.127	0.061	1	ALAS1	0.780776
BORCS6	0.165691	-0.174034	0.109	0.193	1	BORCS6	0.780701
HELZ2	0.165813	0.140839	0.182	0.105	1	HELZ2	0.780381
MOSMO	0.165963	-0.194463	0.055	0.123	1	MOSMO	0.77999
TAF12	0.166054	0.185481	0.327	0.228	1	TAF12	0.77975
MRPL49	0.166123	-0.179125	0.091	0.167	1	MRPL49	0.779569
ASH1L	0.166637	0.133768	0.473	0.342	1	ASH1L	0.77823
KCTD11	0.166729	0.191483	0.109	0.053	1	KCTD11	0.777989
GRB2	0.166994	0.149373	0.527	0.395	1	GRB2	0.777299
DENR	0.167009	0.16338	0.255	0.167	1	DENR	0.77726
ODF2L	0.1672	-0.324803	0.291	0.368	1	ODF2L	0.776765
MORF4L2	0.167248	0.139547	0.273	0.175	1	MORF4L2	0.77664
XRCC6	0.167389	0.131451	0.545	0.421	1	XRCC6	0.776273
ZNF32	0.167538	0.164147	0.273	0.184	1	ZNF32	0.775886
KDM7A	0.167815	0.0940841	0.127	0.061	1	KDM7A	0.775168
EMC1	0.167815	0.0616899	0.127	0.061	1	EMC1	0.775168
ZNF639	0.167936	-0.0676491	0.055	0.123	1	ZNF639	0.774856
DIS3L	0.167936	-0.117604	0.055	0.123	1	DIS3L	0.774856
SAR1A	0.168421	-0.192678	0.273	0.377	1	SAR1A	0.773603
PKN2	0.168495	0.0189889	0.255	0.149	1	PKN2	0.773412
DNTTIP1	0.16893	0.191534	0.145	0.079	1	DNTTIP1	0.772294
CETN2	0.16893	0.117047	0.145	0.079	1	CETN2	0.772294
LPIN2	0.168953	0.0940733	0.527	0.386	1	LPIN2	0.772235
RAD18	0.169052	0.177673	0.109	0.053	1	RAD18	0.771979
DNAJC19	0.169246	-0.228907	0.255	0.342	1	DNAJC19	0.771481
ITM2B	0.169439	-0.124334	0.982	0.974	1	ITM2B	0.770986
KIF5B	0.169745	0.059121	0.545	0.368	1	KIF5B	0.770204
ZCCHC3	0.169927	-0.124252	0.055	0.123	1	ZCCHC3	0.769737
CLCN3	0.169927	-0.144403	0.055	0.123	1	CLCN3	0.769737
XPO4	0.169989	0.0829603	0.127	0.061	1	XPO4	0.769579
NELFCD	0.170079	0.156291	0.327	0.228	1	NELFCD	0.769349
TLE4	0.170094	-0.129669	0.127	0.219	1	TLE4	0.76931
FADD	0.170104	-0.0883508	0.091	0.175	1	FADD	0.769286
B3GALT6	0.170488	0.196143	0.218	0.14	1	B3GALT6	0.768306
HLA-DMA	0.170488	-0.154534	0.109	0.193	1	HLA-DMA	0.768306
NAA38	0.170858	0.0909912	0.491	0.351	1	NAA38	0.767365
MYL6	0.17101	0.122314	0.982	0.991	1	MYL6	0.766979
GBP1	0.171134	0.152054	0.182	0.105	1	GBP1	0.766663
RFC1	0.171217	0.132424	0.418	0.281	1	RFC1	0.766454
TUBB4B	0.17124	0.262577	0.509	0.368	1	TUBB4B	0.766394
C1orf131	0.171282	-0.163389	0.145	0.228	1	C1orf131	0.766289
UQCC3	0.171282	-0.219257	0.145	0.228	1	UQCC3	0.766289
PSMB2	0.172314	0.151831	0.582	0.439	1	PSMB2	0.763681
RBX1	0.17233	0.116174	0.727	0.614	1	RBX1	0.76364
GADD45GIP1	0.172403	0.16853	0.618	0.526	1	GADD45GIP1	0.763455
RAB28	0.172947	0.127326	0.145	0.079	1	RAB28	0.762087
HCFC1R1	0.17298	0.134373	0.236	0.149	1	HCFC1R1	0.762005
PAICS	0.172991	0.0597672	0.2	0.114	1	PAICS	0.761977
SLC35B1	0.173172	0.0979957	0.255	0.158	1	SLC35B1	0.761523
PGPEP1	0.17344	0.100525	0.164	0.088	1	PGPEP1	0.760852
CSTF1	0.17344	0.0894313	0.164	0.088	1	CSTF1	0.760852
EPRS	0.173569	0.153564	0.455	0.333	1	EPRS	0.760527
CEP126	0.173772	0.188153	0.109	0.053	1	CEP126	0.760021
SGK3	0.173772	0.148445	0.109	0.053	1	SGK3	0.760021
TARBP1	0.173772	0.13179	0.109	0.053	1	TARBP1	0.760021
URB1	0.173772	0.106751	0.109	0.053	1	URB1	0.760021
ZNF598	0.173963	-0.138821	0.055	0.123	1	ZNF598	0.759544
MTF2	0.174012	0.0725617	0.364	0.237	1	MTF2	0.759422
SF3B6	0.174066	-0.171715	0.491	0.588	1	SF3B6	0.759287
44080	0.174217	0.153819	0.782	0.675	1	44080	0.758911
RPL18	0.174711	-0.0745363	1	1	1	RPL18	0.757681
ANKRD28	0.17474	0.0926698	0.2	0.114	1	ANKRD28	0.757607
NR3C1	0.174936	0.213513	0.6	0.474	1	NR3C1	0.75712
WAC-AS1	0.17531	-0.256293	0.182	0.263	1	WAC-AS1	0.756194
PNO1	0.17538	0.0848973	0.164	0.088	1	PNO1	0.756019
SFT2D1	0.175539	0.158076	0.473	0.333	1	SFT2D1	0.755627
CCM2	0.175817	-0.236262	0.364	0.447	1	CCM2	0.754939
C15orf61	0.176007	-0.0972894	0.055	0.123	1	C15orf61	0.75447
C6orf106	0.176007	-0.108168	0.055	0.123	1	C6orf106	0.75447
CLK4	0.176028	-0.255418	0.182	0.263	1	CLK4	0.754418
DGAT1	0.176168	0.1364	0.109	0.053	1	DGAT1	0.754073
TBCE.1	0.176168	0.113764	0.109	0.053	1	TBCE.1	0.754073
COX15	0.176168	0.103957	0.109	0.053	1	COX15	0.754073
GRHPR	0.17629	0.0603873	0.255	0.158	1	GRHPR	0.753772
KIAA1551	0.17631	0.0674136	0.782	0.623	1	KIAA1551	0.753723
LAMTOR1	0.176321	-0.229268	0.436	0.509	1	LAMTOR1	0.753696
STN1	0.17641	0.110467	0.291	0.193	1	STN1	0.753476
TTF2	0.176637	0.0461947	0.127	0.061	1	TTF2	0.752917
LSM1	0.176725	0.173915	0.4	0.307	1	LSM1	0.752702
RPS24	0.176852	-0.0814864	1	1	1	RPS24	0.752391
CDK2AP2	0.176917	0.186337	0.6	0.491	1	CDK2AP2	0.752231
AP2B1	0.177884	0.153729	0.291	0.193	1	AP2B1	0.749864
PQBP1	0.177884	0.112248	0.291	0.193	1	PQBP1	0.749864
DMAC1	0.178348	0.0515778	0.345	0.219	1	DMAC1	0.748731
VRK1	0.178427	0.097388	0.182	0.105	1	VRK1	0.748541
BLOC1S2	0.178556	0.136666	0.309	0.211	1	BLOC1S2	0.748225
MTERF3	0.178589	0.0931437	0.109	0.053	1	MTERF3	0.748146
SCAMP1	0.178589	0.0671673	0.109	0.053	1	SCAMP1	0.748146
BRCA1	0.178896	0.0237811	0.127	0.061	1	BRCA1	0.747399
IL2RG	0.179056	0.201577	0.764	0.632	1	IL2RG	0.747011
DDX19B	0.179311	0.0716959	0.164	0.088	1	DDX19B	0.746394
ERV3-1	0.179311	-0.0251594	0.164	0.088	1	ERV3-1	0.746394
TRIM24	0.179333	0.162678	0.164	0.096	1	TRIM24	0.74634
ICE2	0.179333	-0.204262	0.073	0.14	1	ICE2	0.74634
NSMCE3	0.17952	0.159427	0.382	0.272	1	NSMCE3	0.745888
CCNI	0.179874	-0.119313	0.673	0.719	1	CCNI	0.745031
MAU2	0.180285	0.161397	0.182	0.105	1	MAU2	0.74404
UBLCP1	0.180458	0.161832	0.255	0.175	1	UBLCP1	0.743623
TMED2	0.180481	0.132647	0.491	0.36	1	TMED2	0.743569
CASK	0.180922	-0.175567	0.255	0.342	1	CASK	0.742508
VPS51	0.180923	-0.222657	0.255	0.342	1	VPS51	0.742507
RSRC1	0.180969	0.10454	0.327	0.211	1	RSRC1	0.742396
TRPM7	0.181058	0.106048	0.236	0.149	1	TRPM7	0.742181
BAZ2B	0.18117	-0.194213	0.2	0.289	1	BAZ2B	0.741914
ZFYVE28	0.181196	0.165433	0.145	0.079	1	ZFYVE28	0.741851
NUDCD3	0.181196	0.105491	0.145	0.079	1	NUDCD3	0.741851
TSPAN5	0.181482	0.0946103	0.218	0.132	1	TSPAN5	0.741167
THAP11	0.181482	0.0897847	0.218	0.132	1	THAP11	0.741167
WDR55	0.181482	0.0780291	0.218	0.132	1	WDR55	0.741167
ITGAX	0.182295	0.134021	0.273	0.175	1	ITGAX	0.739226
VAPA	0.18247	0.154585	0.582	0.509	1	VAPA	0.738808
MPHOSPH10	0.182555	0.101764	0.382	0.254	1	MPHOSPH10	0.738607
FXYD5	0.182998	-0.276665	0.6	0.579	1	FXYD5	0.737554
VCPIP1	0.183327	0.0274639	0.236	0.14	1	VCPIP1	0.736773
NBN	0.18333	0.101918	0.309	0.202	1	NBN	0.736767
NUMA1	0.18333	0.0879984	0.309	0.202	1	NUMA1	0.736767
IFI6	0.183334	0.349395	0.345	0.254	1	IFI6	0.736757
RPL27	0.183383	-0.1253	0.982	0.956	1	RPL27	0.73664
PRR5	0.183504	0.110205	0.109	0.053	1	PRR5	0.736353
ITGAM	0.183601	0.183755	0.127	0.07	1	ITGAM	0.736125
WDR73	0.183687	-0.201928	0.091	0.167	1	WDR73	0.735922
NUP214	0.184046	0.171412	0.182	0.105	1	NUP214	0.735074
GLCCI1	0.184222	-0.283276	0.255	0.333	1	GLCCI1	0.734658
HIST1H1D	0.184357	-0.137435	0.218	0.325	1	HIST1H1D	0.734339
MRPL20	0.184389	0.204335	0.691	0.518	1	MRPL20	0.734265
KMT2E	0.184389	-0.195095	0.509	0.605	1	KMT2E	0.734265
MPG	0.184529	0.132512	0.491	0.377	1	MPG	0.733937
PHB2	0.184698	0.166641	0.527	0.395	1	PHB2	0.733538
AK3	0.185215	0.138312	0.164	0.096	1	AK3	0.732324
POLM	0.185328	0.0624423	0.164	0.088	1	POLM	0.732059
S100A11	0.18546	-0.0862432	0.927	0.904	1	S100A11	0.73175
ATRX	0.185494	-0.223912	0.473	0.526	1	ATRX	0.731669
HEXDC	0.185604	0.132406	0.255	0.167	1	HEXDC	0.731412
H1FX	0.185776	-0.237344	0.618	0.702	1	H1FX	0.731011
TTC37	0.185816	0.0860217	0.218	0.132	1	TTC37	0.730916
USP24	0.185948	0.0959419	0.182	0.105	1	USP24	0.730609
TSPYL4	0.186	0.0869863	0.109	0.053	1	TSPYL4	0.730488
PMM2	0.186	0.0654847	0.109	0.053	1	PMM2	0.730488
ING4	0.186209	-0.152415	0.145	0.237	1	ING4	0.73
ARID3A	0.186498	-0.108352	0.055	0.123	1	ARID3A	0.729327
ETFA	0.186834	0.137474	0.327	0.237	1	ETFA	0.728544
FBXO6	0.186999	0.123783	0.273	0.175	1	FBXO6	0.72816
PPIA	0.187138	0.16526	0.927	0.816	1	PPIA	0.727837
SSR2	0.187154	0.0993043	0.836	0.64	1	SSR2	0.727801
SNTB2	0.18723	0.115586	0.218	0.14	1	SNTB2	0.727624
RASSF7	0.187359	0.036241	0.2	0.114	1	RASSF7	0.727325
SLC27A3	0.187359	-0.118428	0.091	0.167	1	SLC27A3	0.727325
RBM33	0.187534	-0.268316	0.236	0.307	1	RBM33	0.726919
FBXO38	0.187571	0.0699677	0.145	0.079	1	FBXO38	0.726835
TIMM21	0.187572	0.0666002	0.145	0.079	1	TIMM21	0.726833
NSMCE4A	0.187837	-0.0396626	0.145	0.254	1	NSMCE4A	0.726219
ARHGAP9	0.188047	-0.177761	0.527	0.579	1	ARHGAP9	0.725733
ZNF766	0.188455	-0.219516	0.109	0.184	1	ZNF766	0.724793
METTL6	0.18852	0.1052	0.109	0.053	1	METTL6	0.724643
HSDL2	0.18852	0.0871922	0.109	0.053	1	HSDL2	0.724643
BCAP29	0.188587	0.11716	0.273	0.175	1	BCAP29	0.724488
OXA1L	0.188969	0.139201	0.218	0.14	1	OXA1L	0.723609
TMEM243	0.189059	-0.180676	0.309	0.386	1	TMEM243	0.723402
GNB5	0.189215	-0.200205	0.073	0.14	1	GNB5	0.723045
MBNL1	0.189341	-0.254108	0.618	0.693	1	MBNL1	0.722754
HCST	0.189484	0.139242	0.982	0.912	1	HCST	0.722426
CSNK1G1	0.189766	-0.200764	0.055	0.114	1	CSNK1G1	0.721782
IL2RB	0.189798	0.175599	0.909	0.877	1	IL2RB	0.721709
CD2	0.189961	-0.270598	0.564	0.596	1	CD2	0.721335
NDUFB8	0.190036	0.129198	0.636	0.535	1	NDUFB8	0.721164
STX10	0.190358	-0.238905	0.2	0.263	1	STX10	0.720428
ATP5F1B	0.190393	0.106432	0.545	0.421	1	ATP5F1B	0.720349
TBC1D15	0.190484	0.114809	0.255	0.167	1	TBC1D15	0.720141
AP2S1	0.190967	0.159758	0.582	0.5	1	AP2S1	0.719042
BLVRA	0.191065	0.0939578	0.109	0.053	1	BLVRA	0.718819
ABR	0.191065	0.0871675	0.109	0.053	1	ABR	0.718819
TRIM37	0.191065	0.0796513	0.109	0.053	1	TRIM37	0.718819
ZNF701	0.191085	0.0532155	0.2	0.114	1	ZNF701	0.718773
PRELID3B	0.191085	-0.140929	0.091	0.167	1	PRELID3B	0.718773
TNPO3	0.191239	0.136525	0.164	0.096	1	TNPO3	0.718424
ZDHHC21	0.191239	-0.136722	0.073	0.14	1	ZDHHC21	0.718424
MICB	0.191239	-0.155638	0.073	0.14	1	MICB	0.718424
HMG20B	0.191306	0.147677	0.255	0.167	1	HMG20B	0.718271
SKAP2	0.191568	-0.282754	0.309	0.36	1	SKAP2	0.717676
POLR2G	0.191891	0.0688841	0.436	0.307	1	POLR2G	0.716946
PPP1R12B	0.192006	-0.157115	0.055	0.114	1	PPP1R12B	0.716684
EHMT1	0.192082	-0.221351	0.2	0.281	1	EHMT1	0.716514
ELOB	0.192148	0.135897	0.855	0.693	1	ELOB	0.716365
RMND1	0.192255	-0.156811	0.073	0.14	1	RMND1	0.716121
ELMO1	0.192499	-0.20432	0.091	0.158	1	ELMO1	0.715571
TKT	0.192689	0.0856769	0.473	0.333	1	TKT	0.715142
MCTS1	0.19283	0.0536646	0.327	0.219	1	MCTS1	0.714825
ADIPOR2	0.193278	0.186314	0.164	0.096	1	ADIPOR2	0.713817
ZNF581	0.193278	-0.164328	0.073	0.14	1	ZNF581	0.713817
DARS	0.193399	0.0263732	0.345	0.228	1	DARS	0.713546
SMC6	0.193462	0.155628	0.182	0.114	1	SMC6	0.713405
PPP2R5C	0.193493	-0.161163	0.527	0.561	1	PPP2R5C	0.713335
PFDN6	0.193582	0.15232	0.291	0.202	1	PFDN6	0.713135
OTUB1	0.193617	-0.295537	0.236	0.298	1	OTUB1	0.713056
HAUS8	0.193635	0.0898004	0.109	0.053	1	HAUS8	0.713015
TNFRSF12A	0.193635	0.073369	0.109	0.053	1	TNFRSF12A	0.713015
CLN3	0.193635	0.0678646	0.109	0.053	1	CLN3	0.713015
PI4KA	0.193635	0.0493917	0.109	0.053	1	PI4KA	0.713015
KMT2C	0.193673	-0.246784	0.273	0.351	1	KMT2C	0.71293
HNRNPDL	0.193812	-0.246767	0.636	0.649	1	HNRNPDL	0.712618
COMMD4	0.193917	0.210711	0.327	0.246	1	COMMD4	0.712385
BST2	0.193993	-0.0987645	0.655	0.675	1	BST2	0.712214
CRTAM	0.194111	0.292029	0.145	0.079	1	CRTAM	0.711949
GGA2	0.194257	0.154523	0.218	0.14	1	GGA2	0.711624
HAGHL	0.194266	-0.190368	0.055	0.114	1	HAGHL	0.711602
ZNF3	0.194266	-0.196384	0.055	0.114	1	ZNF3	0.711602
VPS13D	0.194428	-0.235841	0.091	0.158	1	VPS13D	0.711242
STRAP	0.194879	0.174041	0.473	0.377	1	STRAP	0.710236
ZBTB40	0.195334	-0.151927	0.073	0.14	1	ZBTB40	0.709223
CLIP4	0.195334	-0.154952	0.073	0.14	1	CLIP4	0.709223
STAT5B	0.195623	0.0571796	0.218	0.132	1	STAT5B	0.708579
TIA1	0.195675	0.102209	0.182	0.105	1	TIA1	0.708464
LENG1	0.196043	0.187558	0.218	0.14	1	LENG1	0.707648
ALYREF	0.196043	0.116497	0.218	0.14	1	ALYREF	0.707648
SLC35A5	0.196231	0.10417	0.109	0.053	1	SLC35A5	0.707232
CKS1B	0.196263	0.464626	0.218	0.149	1	CKS1B	0.707161
MCCC2	0.196546	-0.143503	0.055	0.114	1	MCCC2	0.706536
EXOSC3	0.196676	0.109417	0.273	0.175	1	EXOSC3	0.70625
RNF19A	0.196693	0.0836278	0.382	0.263	1	RNF19A	0.706212
SMC4	0.196716	0.324032	0.291	0.202	1	SMC4	0.70616
GIPC1	0.196921	0.12412	0.2	0.123	1	GIPC1	0.705707
MFSD14C	0.196921	0.0925542	0.2	0.123	1	MFSD14C	0.705707
GLS	0.197283	0.129518	0.345	0.246	1	GLS	0.70491
AGPAT1	0.197347	0.159063	0.182	0.114	1	AGPAT1	0.70477
SRSF4	0.197676	0.0533326	0.491	0.36	1	SRSF4	0.704046
NCAPD3	0.197841	0.177378	0.145	0.088	1	NCAPD3	0.703684
MKNK2	0.19805	0.0454024	0.236	0.149	1	MKNK2	0.703225
LLGL2	0.198294	0.136986	0.273	0.184	1	LLGL2	0.702691
RNF34	0.198294	0.0243525	0.291	0.175	1	RNF34	0.702691
PLSCR1	0.198297	0.12922	0.291	0.202	1	PLSCR1	0.702684
REXO4	0.198563	0.0603412	0.145	0.079	1	REXO4	0.702101
GNL2	0.198693	-0.227194	0.109	0.175	1	GNL2	0.701817
SNRNP27	0.198826	-0.221046	0.145	0.219	1	SNRNP27	0.701527
RTL8A	0.198852	0.0809625	0.109	0.053	1	RTL8A	0.701469
ATP9B	0.199493	0.151508	0.164	0.096	1	ATP9B	0.700073
KCMF1	0.199887	0.175329	0.291	0.202	1	KCMF1	0.699215
AP2A2	0.200298	-0.155826	0.091	0.158	1	AP2A2	0.698324
MRPL23	0.200567	0.170779	0.2	0.132	1	MRPL23	0.697742
FXN	0.200817	0.0775555	0.145	0.079	1	FXN	0.697199
CCT8	0.201014	0.108048	0.6	0.482	1	CCT8	0.696774
ATP13A3	0.20113	0.0924591	0.218	0.132	1	ATP13A3	0.696524
RBM19	0.201164	-0.167711	0.055	0.114	1	RBM19	0.69645
CNPY2	0.201199	0.0885526	0.509	0.368	1	CNPY2	0.696374
LSP1	0.201252	-0.19586	0.673	0.737	1	LSP1	0.69626
NDUFS2	0.201344	0.14425	0.455	0.351	1	NDUFS2	0.696061
DCAF13	0.201363	0.0911021	0.345	0.237	1	DCAF13	0.69602
ATAD3A	0.201499	0.0577065	0.109	0.053	1	ATAD3A	0.695727
NOSIP	0.20165	0.15061	0.327	0.237	1	NOSIP	0.695401
R3HDM1	0.202259	0.121822	0.236	0.158	1	R3HDM1	0.694092
FAM76B	0.202524	0.0316156	0.236	0.14	1	FAM76B	0.693524
CCZ1	0.202725	0.213243	0.309	0.211	1	CCZ1	0.693093
VGLL4	0.202758	0.0459736	0.255	0.158	1	VGLL4	0.693021
LYST	0.203021	-0.21193	0.473	0.561	1	LYST	0.692459
CFAP97	0.203281	0.0364159	0.273	0.167	1	CFAP97	0.691902
IKBKB	0.203327	-0.279635	0.164	0.228	1	IKBKB	0.691805
PBX2	0.203502	-0.140839	0.055	0.114	1	PBX2	0.691431
CUL4B	0.203502	-0.151476	0.055	0.114	1	CUL4B	0.691431
FAM184B	0.203502	-0.207364	0.055	0.114	1	FAM184B	0.691431
TRMT10C	0.203529	-0.25137	0.2	0.281	1	TRMT10C	0.691374
SLA2	0.20353	0.0614318	0.327	0.219	1	SLA2	0.691373
TRIM38	0.203655	-0.292183	0.291	0.36	1	TRIM38	0.691106
S100A6	0.203659	0.0986852	0.873	0.816	1	S100A6	0.691097
BRD4	0.203942	0.102	0.382	0.272	1	BRD4	0.690494
TFAM	0.204161	0.0413223	0.309	0.202	1	TFAM	0.690028
REEP4	0.204171	0.0560367	0.109	0.053	1	REEP4	0.690005
FAM122A	0.204283	-0.190138	0.091	0.158	1	FAM122A	0.689769
HLA-DRB1	0.204399	-0.284054	0.218	0.298	1	HLA-DRB1	0.68952
IP6K1	0.204555	0.0166668	0.2	0.114	1	IP6K1	0.689189
PPIL2	0.204569	0.132519	0.2	0.123	1	PPIL2	0.689159
FOXN2	0.204569	0.097256	0.2	0.123	1	FOXN2	0.689159
CDC23	0.204608	0.109542	0.127	0.07	1	CDC23	0.689078
EPS15	0.204964	-0.180093	0.182	0.263	1	EPS15	0.688322
CHERP	0.205288	0.148749	0.182	0.114	1	CHERP	0.687637
LRIG2	0.20538	0.0770167	0.145	0.079	1	LRIG2	0.687441
ABHD10	0.20538	0.0768707	0.145	0.079	1	ABHD10	0.687441
CRCP	0.20538	0.0482386	0.145	0.079	1	CRCP	0.687441
SAT1	0.205407	-0.213441	0.255	0.333	1	SAT1	0.687385
FAM3C	0.205689	0.0748506	0.255	0.167	1	FAM3C	0.686789
NOM1	0.205771	0.0331433	0.182	0.105	1	NOM1	0.686616
SOAT1	0.205852	0.118549	0.164	0.096	1	SOAT1	0.686445
ALG3	0.205852	0.113267	0.164	0.096	1	ALG3	0.686445
SNUPN	0.205852	-0.150398	0.073	0.14	1	SNUPN	0.686445
UGDH	0.20586	-0.170276	0.055	0.114	1	UGDH	0.686428
CTNNB1	0.206504	-0.273786	0.218	0.281	1	CTNNB1	0.685071
CHPT1	0.206578	0.0384649	0.309	0.202	1	CHPT1	0.684915
PHF1	0.206578	-0.179176	0.182	0.263	1	PHF1	0.684915
THRAP3	0.20664	0.126748	0.727	0.579	1	THRAP3	0.684786
TP53TG1	0.206869	0.0491901	0.109	0.053	1	TP53TG1	0.684304
AHR	0.206869	0.0469737	0.109	0.053	1	AHR	0.684304
MAZ	0.206884	0.141464	0.527	0.421	1	MAZ	0.684273
CDK5RAP2	0.206971	0.0902038	0.236	0.149	1	CDK5RAP2	0.68409
KDM5C	0.207046	0.163238	0.127	0.07	1	KDM5C	0.683934
ERH	0.207311	0.134527	0.655	0.535	1	ERH	0.683378
SUPT3H	0.208004	0.106617	0.164	0.096	1	SUPT3H	0.681928
SLBP	0.208017	0.222899	0.273	0.193	1	SLBP	0.681902
DDX58	0.208474	0.0934896	0.2	0.123	1	DDX58	0.680949
SLC12A6	0.208528	-0.156357	0.091	0.167	1	SLC12A6	0.680836
TCIRG1	0.208818	0.157379	0.382	0.289	1	TCIRG1	0.680231
WDR83	0.208886	0.104475	0.218	0.14	1	WDR83	0.68009
TTC21B	0.209505	0.142798	0.127	0.07	1	TTC21B	0.678807
SESN3	0.209505	0.0926488	0.127	0.07	1	SESN3	0.678807
CCDC88C	0.209554	0.107638	0.4	0.281	1	CCDC88C	0.678704
WASHC5	0.209593	0.0363336	0.109	0.053	1	WASHC5	0.678623
NME6	0.209593	0.024803	0.109	0.053	1	NME6	0.678623
NBAS	0.209593	0.0211352	0.109	0.053	1	NBAS	0.678623
FAM98A	0.210019	0.0783525	0.145	0.079	1	FAM98A	0.677742
TATDN1	0.210126	-0.220111	0.109	0.175	1	TATDN1	0.67752
HLA-C	0.21013	0.067507	1	1	1	HLA-C	0.677512
A1BG	0.210172	-0.137734	0.073	0.14	1	A1BG	0.677424
[truncated: 4,007 more rows]

## Sheet: S4D PD-1 vs. Bispecific
Table S4D: NK Cell Differential Expression Bispecific vs. PD-1
	p_val	avg_logFC	pct.1	pct.2	p_val_adj	Gene_ID	logP
MED24	1.45127e-05	0.270887	0.236	0.025	0.293128	MED24	4.83825
BTBD6	0.000136015	0.403953	0.436	0.169	1	BTBD6	3.86641
AXIN1	0.000140188	0.365062	0.327	0.093	1	AXIN1	3.85329
RPS27	0.000170884	-0.215582	1	1	1	RPS27	3.7673
TUBB2A	0.000277662	0.196636	0.109	0	1	TUBB2A	3.55648
RPL28	0.000311717	-0.183449	1	1	1	RPL28	3.50624
NACC1	0.000369657	0.337361	0.236	0.059	1	NACC1	3.4322
KATNAL1	0.000517871	0.219461	0.127	0.008	1	KATNAL1	3.28578
CCNG2	0.000585725	0.345354	0.255	0.068	1	CCNG2	3.23231
FOSL2	0.000623352	0.314142	0.255	0.068	1	FOSL2	3.20527
SRM	0.000753033	0.456099	0.618	0.347	1	SRM	3.12319
CRELD2	0.000756256	0.520445	0.4	0.178	1	CRELD2	3.12133
PECR	0.000768757	0.255065	0.164	0.025	1	PECR	3.11421
KLF10	0.000775961	0.316761	0.236	0.059	1	KLF10	3.11016
STARD3NL	0.000834391	0.37932	0.527	0.263	1	STARD3NL	3.07863
IL4R	0.000908596	-0.435707	0.091	0.314	1	IL4R	3.04163
RABEP1	0.000916696	0.345783	0.345	0.127	1	RABEP1	3.03777
PPP1R12C	0.000965398	0.217921	0.218	0.051	1	PPP1R12C	3.01529
SMARCAL1	0.0010293	0.261066	0.164	0.025	1	SMARCAL1	2.98746
PAAF1	0.0011542	0.180404	0.182	0.034	1	PAAF1	2.93772
PRPF38B	0.00160556	-0.412709	0.473	0.703	1	PRPF38B	2.79437
CREB3	0.00171889	0.286986	0.218	0.059	1	CREB3	2.76475
GOT1	0.00181436	0.341983	0.182	0.042	1	GOT1	2.74128
SLC26A2	0.00186507	0.281056	0.218	0.059	1	SLC26A2	2.72931
POLD4	0.00191341	0.208864	0.109	0.008	1	POLD4	2.71819
NCAPH2	0.002049	0.324912	0.2	0.051	1	NCAPH2	2.68846
NIP7	0.0021849	0.359529	0.309	0.127	1	NIP7	2.66057
BET1	0.00221176	0.222214	0.236	0.068	1	BET1	2.65526
SLC37A3	0.00224318	0.250141	0.164	0.034	1	SLC37A3	2.64914
NT5DC2	0.00232484	0.205991	0.127	0.017	1	NT5DC2	2.63361
SLC25A11	0.00234154	0.355709	0.436	0.212	1	SLC25A11	2.6305
CD2	0.00236286	-0.58375	0.564	0.703	1	CD2	2.62656
RPL10	0.00241925	-0.177492	1	1	1	RPL10	2.61632
ZNF836	0.00245356	0.228364	0.145	0.025	1	ZNF836	2.6102
LDLR	0.00252907	0.20728	0.127	0.017	1	LDLR	2.59704
MTMR10	0.00260071	0.200845	0.127	0.017	1	MTMR10	2.58491
DDX10	0.00278313	0.393433	0.255	0.093	1	DDX10	2.55547
GHITM	0.00285209	0.299004	0.709	0.466	1	GHITM	2.54484
WDR5	0.0029057	0.161521	0.164	0.034	1	WDR5	2.53675
COMMD10	0.00291709	0.378185	0.236	0.076	1	COMMD10	2.53505
HSPA14.1	0.00291709	-0.364088	0.018	0.178	1	HSPA14.1	2.53505
HSP90AA1	0.00299309	0.248669	0.982	0.915	1	HSP90AA1	2.52388
PNKP	0.00313217	0.314252	0.491	0.254	1	PNKP	2.50415
NAA25	0.00320516	-0.255335	0	0.144	1	NAA25	2.49415
KBTBD3	0.00320516	-0.302165	0	0.144	1	KBTBD3	2.49415
GCSH	0.00336097	0.27015	0.218	0.068	1	GCSH	2.47354
TUBA1A	0.003411	0.31443	0.6	0.356	1	TUBA1A	2.46712
MRPL35	0.00350003	0.278844	0.236	0.076	1	MRPL35	2.45593
PLEK	0.0037092	0.348498	0.436	0.22	1	PLEK	2.43072
SF3B5	0.0038044	0.292728	0.764	0.568	1	SF3B5	2.41971
CYB5R3	0.0038336	0.271447	0.218	0.068	1	CYB5R3	2.41639
H3F3A	0.00389453	0.2343	1	0.975	1	H3F3A	2.40955
ARPC2	0.00393517	0.223073	1	0.992	1	ARPC2	2.40504
TMIGD2	0.00397822	0.354914	0.6	0.39	1	TMIGD2	2.40031
PNP	0.00422468	-0.331363	0.127	0.339	1	PNP	2.37421
DBNL	0.00429555	0.296871	0.509	0.271	1	DBNL	2.36698
MT-ND3	0.00436214	-0.160299	1	1	1	MT-ND3	2.3603
HCST	0.00440325	0.236838	0.982	0.924	1	HCST	2.35623
GOT2	0.00452496	0.220479	0.2	0.059	1	GOT2	2.34438
ITGB3BP	0.00452979	0.211703	0.218	0.068	1	ITGB3BP	2.34392
TAF3	0.00453531	0.352134	0.327	0.144	1	TAF3	2.34339
POU2F2	0.00463568	0.293965	0.236	0.085	1	POU2F2	2.33389
LUC7L	0.00464983	-0.313935	0.018	0.169	1	LUC7L	2.33256
NCK2	0.00466904	-0.3818	0.109	0.297	1	NCK2	2.33077
PANK2	0.0048212	0.314256	0.327	0.153	1	PANK2	2.31684
NUDT5	0.00483929	0.300014	0.509	0.297	1	NUDT5	2.31522
PRDX4	0.00489309	0.27652	0.291	0.119	1	PRDX4	2.31042
YTHDF2	0.0049545	0.305811	0.509	0.297	1	YTHDF2	2.305
RNF126	0.00500148	0.259487	0.364	0.161	1	RNF126	2.3009
C11orf68	0.00519473	0.211931	0.273	0.102	1	C11orf68	2.28444
NEPRO	0.00536364	0.339659	0.291	0.119	1	NEPRO	2.27054
EXOSC10	0.00537472	0.196772	0.2	0.059	1	EXOSC10	2.26964
SDCBP	0.00559281	0.268937	0.545	0.331	1	SDCBP	2.25237
PELP1	0.00566927	0.201949	0.182	0.051	1	PELP1	2.24647
EIF4G3	0.00574979	-0.355248	0.091	0.271	1	EIF4G3	2.24035
CIC	0.00577	0.236659	0.164	0.042	1	CIC	2.23882
TESK1	0.00579668	0.195706	0.2	0.059	1	TESK1	2.23682
PRDX3	0.00585482	0.338505	0.291	0.136	1	PRDX3	2.23249
DPM1	0.00590567	-0.291649	0.073	0.246	1	DPM1	2.22873
CNPY3	0.00614064	0.34338	0.4	0.203	1	CNPY3	2.21179
SASH3	0.00629239	0.311948	0.455	0.254	1	SASH3	2.20118
CATSPER1	0.00640389	0.227276	0.236	0.085	1	CATSPER1	2.19356
BAZ1A	0.00669209	0.344161	0.4	0.22	1	BAZ1A	2.17444
GPR89B	0.00673069	0.200235	0.109	0.017	1	GPR89B	2.17194
RPS23	0.00678369	-0.154223	1	1	1	RPS23	2.16853
PNRC2	0.00680299	-0.384564	0.236	0.458	1	PNRC2	2.1673
ST3GAL2	0.00687214	0.291456	0.255	0.102	1	ST3GAL2	2.16291
TP53BP2	0.00690358	0.16365	0.182	0.051	1	TP53BP2	2.16093
MZT2A	0.00702361	0.300568	0.582	0.381	1	MZT2A	2.15344
NEDD9	0.00704539	0.272611	0.327	0.153	1	NEDD9	2.1521
PANK4	0.0071032	0.139551	0.109	0.017	1	PANK4	2.14855
TTPAL	0.00717764	0.133503	0.182	0.051	1	TTPAL	2.14402
ST8SIA6	0.00729631	0.193307	0.109	0.017	1	ST8SIA6	2.1369
ZNF414	0.00729631	0.11755	0.109	0.017	1	ZNF414	2.1369
WTAP	0.00749135	-0.324817	0.273	0.5	1	WTAP	2.12544
GEN1	0.00749412	0.120253	0.109	0.017	1	GEN1	2.12528
DBN1	0.00754405	0.303749	0.127	0.025	1	DBN1	2.1224
NNT-AS1	0.00759633	-0.237919	0.018	0.153	1	NNT-AS1	2.1194
CENPN	0.00762813	0.151488	0.145	0.034	1	CENPN	2.11758
TUT7	0.00765034	-0.369276	0.091	0.263	1	TUT7	2.11632
PHKA2	0.0077272	0.164231	0.127	0.025	1	PHKA2	2.11198
FMNL3	0.00781276	0.191947	0.236	0.085	1	FMNL3	2.1072
FAM129A	0.00784906	-0.319492	0.109	0.297	1	FAM129A	2.10518
PPP2R2A	0.00785845	0.37343	0.4	0.22	1	PPP2R2A	2.10466
PASK	0.00787971	0.171844	0.164	0.042	1	PASK	2.10349
DCPS	0.00791236	0.244748	0.255	0.102	1	DCPS	2.10169
SNRNP40	0.00795215	0.259671	0.491	0.28	1	SNRNP40	2.09952
PTPMT1	0.00804231	-0.22476	0	0.119	1	PTPMT1	2.09462
GCC2	0.00805593	-0.440993	0.473	0.636	1	GCC2	2.09388
PPP1R7	0.00809415	0.253523	0.655	0.398	1	PPP1R7	2.09183
ATP13A2	0.00850029	0.18151	0.127	0.025	1	ATP13A2	2.07057
ACTR6	0.00857999	0.261334	0.364	0.186	1	ACTR6	2.06651
CD160	0.00858383	0.570654	0.236	0.093	1	CD160	2.06632
COPS5	0.00859918	0.290134	0.436	0.263	1	COPS5	2.06554
INPP1	0.00875543	0.202407	0.2	0.068	1	INPP1	2.05772
SH3BP5	0.00886154	-0.281321	0.036	0.186	1	SH3BP5	2.05249
H2AFV	0.0088761	0.271081	0.709	0.517	1	H2AFV	2.05178
UBE2L3	0.00888835	0.260366	0.727	0.568	1	UBE2L3	2.05118
ADGRE5	0.00899328	0.324245	0.6	0.398	1	ADGRE5	2.04608
RABL6	0.00900795	0.226658	0.4	0.195	1	RABL6	2.04537
DOHH	0.00906885	0.296489	0.2	0.068	1	DOHH	2.04245
TAP2	0.00922447	0.299469	0.291	0.127	1	TAP2	2.03506
MOGS	0.00931693	0.232179	0.273	0.11	1	MOGS	2.03073
UCHL5	0.00937642	0.190745	0.382	0.178	1	UCHL5	2.02796
EMD	0.00943102	0.272434	0.309	0.144	1	EMD	2.02544
RRP7A	0.00971422	0.3144	0.436	0.254	1	RRP7A	2.01259
CDK4	0.00989644	0.236058	0.309	0.136	1	CDK4	2.00452
LRR1	0.00989665	0.216938	0.2	0.068	1	LRR1	2.00451
MORF4L1	0.00998677	-0.320694	0.491	0.703	1	MORF4L1	2.00057
AL645568.1	0.010021	0.129237	0.127	0.025	1	AL645568.1	1.99909
USP22	0.0101848	0.242269	0.291	0.127	1	USP22	1.99205
CHMP7	0.0102462	0.226884	0.2	0.068	1	CHMP7	1.98944
ZBED1	0.0103659	-0.245413	0.036	0.178	1	ZBED1	1.98439
PTPN6	0.010405	0.316999	0.564	0.364	1	PTPN6	1.98276
CAPN7	0.0107911	0.201423	0.2	0.068	1	CAPN7	1.96693
RFC4	0.0108661	0.26704	0.255	0.11	1	RFC4	1.96393
SPATA20	0.0108945	-0.231839	0	0.11	1	SPATA20	1.96279
MAU2	0.0109771	0.284457	0.182	0.059	1	MAU2	1.95951
GNG2	0.011003	0.263759	0.473	0.271	1	GNG2	1.95849
FIBP	0.011039	0.328523	0.473	0.314	1	FIBP	1.95707
CAST	0.0110402	-0.337367	0.473	0.636	1	CAST	1.95702
PPHLN1	0.0111147	-0.349379	0.255	0.424	1	PPHLN1	1.9541
CHEK1	0.011177	0.234846	0.182	0.059	1	CHEK1	1.95167
CLASRP	0.0113802	0.222525	0.182	0.059	1	CLASRP	1.94385
ETNK1	0.0115001	0.190671	0.309	0.136	1	ETNK1	1.9393
SUDS3	0.0115577	0.203577	0.2	0.068	1	SUDS3	1.93713
ARHGAP21	0.0117963	0.194775	0.182	0.059	1	ARHGAP21	1.92826
CYBA	0.0119048	0.156485	1	0.983	1	CYBA	1.92428
PPP1R18	0.0120488	0.244918	0.727	0.576	1	PPP1R18	1.91906
ZNF117	0.0121441	0.190676	0.164	0.051	1	ZNF117	1.91563
TSR2	0.0121454	0.220217	0.418	0.22	1	TSR2	1.91559
LIN7C	0.0122258	0.17395	0.182	0.059	1	LIN7C	1.91272
SDF2	0.0122348	0.271558	0.509	0.322	1	SDF2	1.9124
DDX21	0.0122862	0.29956	0.455	0.28	1	DDX21	1.91058
TCOF1	0.0124916	0.263744	0.255	0.11	1	TCOF1	1.90338
SLC52A2	0.012502	0.268566	0.218	0.085	1	SLC52A2	1.90302
APIP	0.0127982	0.122586	0.2	0.068	1	APIP	1.89285
TMOD3	0.0129039	0.246799	0.545	0.339	1	TMOD3	1.88928
XIST	0.0129451	0.220233	0.891	0.763	1	XIST	1.8879
ADK	0.0133242	-0.236288	0.036	0.178	1	ADK	1.87536
TRGC1	0.0133706	0.245218	0.436	0.237	1	TRGC1	1.87385
ZSWIM7	0.0138097	0.256224	0.291	0.136	1	ZSWIM7	1.85982
JAKMIP2	0.0141036	0.184715	0.236	0.093	1	JAKMIP2	1.85067
RPL21	0.0141665	-0.131292	1	1	1	RPL21	1.84874
CDT1	0.014335	0.149625	0.182	0.059	1	CDT1	1.8436
LEPROTL1	0.0143361	-0.300592	0.382	0.585	1	LEPROTL1	1.84357
RPL29	0.0144252	-0.134099	1	0.992	1	RPL29	1.84088
RHEB	0.0144609	0.245809	0.509	0.322	1	RHEB	1.8398
PDRG1	0.0145691	0.221003	0.291	0.136	1	PDRG1	1.83657
ANKRD40	0.0146332	0.224058	0.218	0.085	1	ANKRD40	1.83466
PTPRE	0.0146425	-0.371056	0.109	0.271	1	PTPRE	1.83439
METTL22	0.0147416	-0.181451	0	0.102	1	METTL22	1.83146
MIR181A1HG	0.0147416	-0.190563	0	0.102	1	MIR181A1HG	1.83146
TM9SF4	0.0147416	-0.219241	0	0.102	1	TM9SF4	1.83146
GTF3C1	0.014863	0.204337	0.218	0.085	1	GTF3C1	1.82789
PSMD7	0.0149592	0.286638	0.564	0.381	1	PSMD7	1.82509
SUSD6	0.0149778	0.208725	0.236	0.093	1	SUSD6	1.82455
FAM110A	0.0150634	0.2414	0.255	0.11	1	FAM110A	1.82208
PPM1A	0.0151783	0.151285	0.291	0.127	1	PPM1A	1.81878
GNAI3	0.0153135	-0.300126	0.327	0.508	1	GNAI3	1.81492
HIGD1A	0.0154119	0.237586	0.309	0.153	1	HIGD1A	1.81214
RPS13	0.0155718	-0.168094	0.982	0.975	1	RPS13	1.80766
USP25	0.0159599	0.28424	0.309	0.161	1	USP25	1.79697
SWI5	0.0160219	0.347474	0.182	0.068	1	SWI5	1.79528
RAB5A	0.0162122	-0.23969	0.055	0.195	1	RAB5A	1.79016
CCS	0.0164253	0.246079	0.309	0.153	1	CCS	1.78449
ARHGEF2	0.016447	-0.224014	0.073	0.229	1	ARHGEF2	1.78391
CBR4	0.016573	0.286601	0.309	0.161	1	CBR4	1.7806
AC090152.1	0.0166668	0.206346	0.309	0.144	1	AC090152.1	1.77815
ZNF639	0.0166832	-0.194453	0.055	0.195	1	ZNF639	1.77772
TMED9	0.0167785	0.341396	0.545	0.364	1	TMED9	1.77525
ITGA4	0.0169715	-0.384797	0.309	0.449	1	ITGA4	1.77028
PLEKHF2	0.0170489	0.230164	0.236	0.102	1	PLEKHF2	1.7683
RPL34	0.0170996	-0.153179	0.982	1	1	RPL34	1.76701
GPAA1	0.0171905	0.241684	0.327	0.169	1	GPAA1	1.76471
STOM	0.0172217	0.234519	0.636	0.449	1	STOM	1.76392
TERF1	0.0172771	0.298419	0.418	0.237	1	TERF1	1.76253
PQBP1	0.0174374	0.250098	0.291	0.144	1	PQBP1	1.75852
CENPM	0.0175536	0.238771	0.145	0.042	1	CENPM	1.75563
PLCXD2	0.0175536	0.187982	0.145	0.042	1	PLCXD2	1.75563
CCZ1	0.0177183	0.36689	0.309	0.153	1	CCZ1	1.75158
SAMD1	0.0179257	0.276262	0.273	0.136	1	SAMD1	1.74652
HNRNPA0	0.0180684	0.285828	0.564	0.398	1	HNRNPA0	1.74308
ZNF100	0.0181609	0.182195	0.127	0.034	1	ZNF100	1.74086
TUBGCP3	0.0182435	0.132375	0.145	0.042	1	TUBGCP3	1.73889
NME1	0.0183621	0.381473	0.418	0.254	1	NME1	1.73608
PGM1	0.0184101	0.240961	0.2	0.076	1	PGM1	1.73494
PSMB4	0.0184937	0.255546	0.655	0.449	1	PSMB4	1.73298
HMGB2	0.0185754	0.381302	0.6	0.415	1	HMGB2	1.73106
MMP25-AS1	0.018742	-0.411628	0.291	0.458	1	MMP25-AS1	1.72718
OAS1	0.0191292	0.307836	0.236	0.102	1	OAS1	1.7183
EED	0.0192478	0.104866	0.236	0.093	1	EED	1.71562
TEDC1	0.0193229	0.177823	0.145	0.042	1	TEDC1	1.71393
MIR4435-2HG	0.0193749	-0.199917	0.018	0.127	1	MIR4435-2HG	1.71276
LARP7	0.0196958	0.287939	0.582	0.39	1	LARP7	1.70563
TIMMDC1	0.0197152	0.251559	0.309	0.161	1	TIMMDC1	1.7052
CCDC152	0.0197275	0.230776	0.127	0.034	1	CCDC152	1.70493
XPNPEP3	0.0198341	0.171082	0.109	0.025	1	XPNPEP3	1.70259
TEN1	0.0198886	0.207567	0.182	0.068	1	TEN1	1.7014
FOXN2	0.0199169	0.197676	0.2	0.076	1	FOXN2	1.70078
MRPL19	0.0199445	-0.309686	0.091	0.229	1	MRPL19	1.70018
UTP11	0.0200721	0.185221	0.364	0.186	1	UTP11	1.69741
TIMM10	0.0200819	0.238884	0.273	0.127	1	TIMM10	1.6972
KHSRP	0.0202502	0.215357	0.236	0.102	1	KHSRP	1.69357
LCP1	0.0202855	0.150914	0.945	0.788	1	LCP1	1.69281
TBCE.1	0.0202868	0.188235	0.109	0.025	1	TBCE.1	1.69279
RBBP6	0.0206231	-0.274064	0.2	0.39	1	RBBP6	1.68565
ZMYM3	0.0207485	0.192987	0.109	0.025	1	ZMYM3	1.68301
ERCC3	0.0209786	0.187005	0.127	0.034	1	ERCC3	1.67822
PACS1	0.0212287	0.292488	0.418	0.237	1	PACS1	1.67308
MBP	0.0212388	-0.152554	0.764	0.89	1	MBP	1.67287
FBXO38	0.0212461	0.122965	0.145	0.042	1	FBXO38	1.67272
PDE12	0.0214916	0.294667	0.236	0.11	1	PDE12	1.66773
FAM104A	0.0215112	0.275887	0.273	0.136	1	FAM104A	1.66734
UBL3	0.0215798	0.190242	0.182	0.068	1	UBL3	1.66595
IL27RA	0.0215965	0.319271	0.527	0.39	1	IL27RA	1.66562
SPDL1	0.0216994	0.124001	0.109	0.025	1	SPDL1	1.66355
AC139887.2	0.0218575	-0.227095	0.018	0.127	1	AC139887.2	1.6604
CLCN3	0.0220391	-0.230177	0.055	0.186	1	CLCN3	1.65681
FGFBP2	0.022189	0.250167	0.109	0.025	1	FGFBP2	1.65386
MLLT1	0.022189	0.155383	0.109	0.025	1	MLLT1	1.65386
KLHL21	0.0222984	0.118844	0.127	0.034	1	KLHL21	1.65173
HACD2	0.0224783	0.0832178	0.145	0.042	1	HACD2	1.64824
TSPAN31	0.022536	-0.215392	0.091	0.246	1	TSPAN31	1.64712
CDC45	0.0226881	0.126307	0.109	0.025	1	CDC45	1.6442
STX2	0.0226881	0.100083	0.109	0.025	1	STX2	1.6442
PABPN1	0.0228817	0.218652	0.527	0.322	1	PABPN1	1.64051
ZFP91	0.0229018	0.14438	0.2	0.076	1	ZFP91	1.64013
ALKBH4	0.0230034	0.232144	0.164	0.059	1	ALKBH4	1.63821
FXYD5	0.0230062	-0.341673	0.6	0.644	1	FXYD5	1.63815
ZBTB14	0.0230216	0.208371	0.182	0.068	1	ZBTB14	1.63787
OSBPL9	0.0231726	0.258142	0.218	0.093	1	OSBPL9	1.63503
FAM193B	0.0231969	0.148038	0.109	0.025	1	FAM193B	1.63457
OSTC	0.0232496	0.307569	0.564	0.432	1	OSTC	1.63358
MYL12B	0.0232651	0.180722	0.982	0.924	1	MYL12B	1.6333
DYNLL1	0.0234964	0.262919	0.855	0.754	1	DYNLL1	1.629
TLE4	0.0236492	-0.317756	0.127	0.288	1	TLE4	1.62618
PCGF3	0.0237156	0.089733	0.109	0.025	1	PCGF3	1.62497
BTBD1	0.0237345	0.275841	0.2	0.085	1	BTBD1	1.62462
QTRT1	0.0237345	0.244472	0.2	0.085	1	QTRT1	1.62462
AL135925.1	0.0237733	0.194101	0.182	0.068	1	AL135925.1	1.62391
NR2C2	0.0237733	0.147682	0.182	0.068	1	NR2C2	1.62391
PSMB9	0.0239385	0.193484	0.909	0.856	1	PSMB9	1.6209
TMEM9B	0.0240978	0.184887	0.455	0.28	1	TMEM9B	1.61802
TMEM129	0.0241571	0.172529	0.182	0.068	1	TMEM129	1.61696
MCRIP2	0.0241959	0.194612	0.218	0.093	1	MCRIP2	1.61626
CCDC124	0.0242132	0.193021	0.291	0.144	1	CCDC124	1.61595
LZTR1	0.0242444	0.144736	0.109	0.025	1	LZTR1	1.61539
STAT4	0.0245016	0.239026	0.382	0.22	1	STAT4	1.61081
GDF11	0.0246124	-0.134208	0.018	0.127	1	GDF11	1.60885
RER1	0.0246439	0.265091	0.545	0.381	1	RER1	1.60829
NAPG	0.0247224	-0.229805	0.036	0.153	1	NAPG	1.60691
POLR1E	0.0248997	0.204846	0.218	0.093	1	POLR1E	1.60381
AK3	0.0250295	0.198924	0.164	0.059	1	AK3	1.60155
RBM5	0.0250496	0.228065	0.418	0.246	1	RBM5	1.6012
MAP4K4	0.0251381	-0.285481	0.073	0.203	1	MAP4K4	1.59967
SAAL1	0.0254528	0.248442	0.164	0.059	1	SAAL1	1.59427
RPAIN	0.0257703	0.301074	0.345	0.195	1	RPAIN	1.58888
CTNNB1	0.0258389	-0.380353	0.218	0.356	1	CTNNB1	1.58773
TUBA1B	0.0258597	0.665852	0.745	0.653	1	TUBA1B	1.58738
TPRKB	0.0260109	0.226276	0.309	0.161	1	TPRKB	1.58485
TNFAIP8L1	0.0262776	0.29027	0.182	0.076	1	TNFAIP8L1	1.58041
MRM3	0.0263179	0.179305	0.164	0.059	1	MRM3	1.57975
RAB11FIP4	0.0263606	0.203891	0.218	0.093	1	RAB11FIP4	1.57904
LSM3	0.026386	0.289368	0.618	0.466	1	LSM3	1.57863
APEH	0.0263924	0.142257	0.236	0.102	1	APEH	1.57852
MRPS14	0.0265033	0.210745	0.4	0.229	1	MRPS14	1.5767
CELF2	0.0265299	0.225646	0.655	0.483	1	CELF2	1.57626
GNAQ	0.0266671	0.0968207	0.2	0.076	1	GNAQ	1.57402
PILRB	0.0270539	0.192895	0.473	0.28	1	PILRB	1.56777
POLR3D	0.0270715	-0.202824	0.036	0.153	1	POLR3D	1.56749
SMIM19	0.027207	0.198418	0.527	0.322	1	SMIM19	1.56532
EIF4G1	0.0274664	0.224476	0.364	0.203	1	EIF4G1	1.5612
GPS1	0.0275044	0.174074	0.218	0.093	1	GPS1	1.5606
HVCN1	0.0277573	-0.238197	0.018	0.119	1	HVCN1	1.55662
MRPS18B	0.0279629	0.35549	0.418	0.288	1	MRPS18B	1.55342
LLGL2	0.0280561	0.228017	0.273	0.136	1	LLGL2	1.55197
TNKS2	0.0280561	0.214824	0.273	0.136	1	TNKS2	1.55197
OSTF1	0.0282053	0.262752	0.745	0.593	1	OSTF1	1.54967
STX11	0.0285926	0.189975	0.164	0.059	1	STX11	1.54375
NQO2	0.0286107	-0.233222	0.055	0.178	1	NQO2	1.54347
RFXAP	0.028746	0.127129	0.182	0.068	1	RFXAP	1.54142
RNPC3	0.028746	0.108117	0.182	0.068	1	RNPC3	1.54142
SNX4	0.0287651	0.197983	0.2	0.085	1	SNX4	1.54113
MPDU1	0.0289711	0.197101	0.236	0.11	1	MPDU1	1.53804
YWHAE	0.029124	0.26584	0.509	0.356	1	YWHAE	1.53575
IFI35	0.0291241	0.333129	0.455	0.288	1	IFI35	1.53575
CTPS1	0.0291408	0.186811	0.145	0.051	1	CTPS1	1.5355
MRPL51	0.0293638	0.19578	0.709	0.619	1	MRPL51	1.53219
SLC5A3	0.0296216	0.325247	0.564	0.441	1	SLC5A3	1.52839
ALKBH2	0.0296538	0.183272	0.145	0.051	1	ALKBH2	1.52792
COA6	0.029685	0.210152	0.382	0.22	1	COA6	1.52746
ST8SIA4	0.0296854	0.21124	0.327	0.178	1	ST8SIA4	1.52746
PRCC	0.0297022	-0.257164	0.036	0.144	1	PRCC	1.52721
CCDC47	0.0297698	0.250315	0.291	0.153	1	CCDC47	1.52622
COX4I1	0.0297895	0.166127	0.891	0.966	1	COX4I1	1.52594
EXOSC5	0.0300372	0.183438	0.164	0.059	1	EXOSC5	1.52234
TTC17	0.03013	-0.247478	0.055	0.169	1	TTC17	1.521
FANCI	0.0301746	0.217536	0.145	0.051	1	FANCI	1.52036
WASHC2C	0.0305324	0.163686	0.164	0.059	1	WASHC2C	1.51524
TAGAP	0.0305896	0.325163	0.273	0.136	1	TAGAP	1.51443
LYRM1	0.0307808	0.272711	0.236	0.119	1	LYRM1	1.51172
OLA1	0.0307956	0.135503	0.4	0.212	1	OLA1	1.51151
RBCK1	0.0308126	0.252781	0.473	0.314	1	RBCK1	1.51127
ZNF814	0.0309313	0.183896	0.2	0.085	1	ZNF814	1.5096
FBXW7	0.0309554	-0.137369	0.036	0.153	1	FBXW7	1.50926
CDC40	0.0311279	-0.291945	0.291	0.449	1	CDC40	1.50685
PRDX5	0.0313635	0.222645	0.764	0.636	1	PRDX5	1.50358
HDDC2	0.0314493	0.166436	0.509	0.305	1	HDDC2	1.50239
KRT81	0.0316244	0.260298	0.291	0.144	1	KRT81	1.49998
RIOX2	0.0317843	0.191891	0.145	0.051	1	RIOX2	1.49779
INPP4A	0.0319387	-0.342746	0.164	0.297	1	INPP4A	1.49568
UBE2D3	0.032223	0.239792	0.764	0.669	1	UBE2D3	1.49183
EIF4A2	0.0325576	-0.279929	0.836	0.822	1	EIF4A2	1.48735
TMEM183A	0.0325785	0.242545	0.273	0.153	1	TMEM183A	1.48707
ALKBH7	0.0326679	-0.301615	0.2	0.347	1	ALKBH7	1.48588
ALG5	0.0327723	0.13648	0.291	0.144	1	ALG5	1.48449
TBC1D7	0.0331152	0.120437	0.164	0.059	1	TBC1D7	1.47997
SBNO2	0.0332359	0.249933	0.2	0.085	1	SBNO2	1.47839
MVB12A	0.0333171	0.19096	0.273	0.136	1	MVB12A	1.47733
PHF3	0.0337634	-0.348768	0.273	0.424	1	PHF3	1.47155
CASTOR3	0.0339707	0.239013	0.127	0.042	1	CASTOR3	1.46889
ANXA5	0.0340398	-0.287322	0.164	0.314	1	ANXA5	1.46801
ELMOD3	0.0341198	-0.279746	0.055	0.169	1	ELMOD3	1.46699
RB1	0.0341995	0.115804	0.164	0.059	1	RB1	1.46598
CMTM6	0.0342972	0.151956	0.655	0.449	1	CMTM6	1.46474
SSR4	0.0343548	0.220573	0.945	0.847	1	SSR4	1.46401
FEN1	0.0344853	0.261435	0.255	0.127	1	FEN1	1.46237
GK5	0.0346122	0.25101	0.218	0.102	1	GK5	1.46077
C11orf71	0.0346309	0.152228	0.145	0.051	1	C11orf71	1.46054
MAP3K11	0.0346309	0.116393	0.145	0.051	1	MAP3K11	1.46054
MFSD10	0.034717	-0.304534	0.273	0.424	1	MFSD10	1.45946
TSSC4	0.0349695	-0.235298	0.164	0.331	1	TSSC4	1.45631
MON1B	0.035184	0.142723	0.2	0.085	1	MON1B	1.45365
MRPL55	0.0351913	0.274335	0.345	0.195	1	MRPL55	1.45356
PHF23	0.0352075	0.249014	0.273	0.144	1	PHF23	1.45336
FBXL4	0.0352256	0.129384	0.145	0.051	1	FBXL4	1.45314
USF2	0.0356529	0.239307	0.491	0.305	1	USF2	1.44791
DHRS7B	0.0357889	0.103511	0.218	0.093	1	DHRS7B	1.44625
VPS26C	0.0360091	0.136996	0.291	0.144	1	VPS26C	1.44359
CLK4	0.036107	-0.226999	0.182	0.331	1	CLK4	1.44241
MYBL1	0.0362501	0.164408	0.273	0.136	1	MYBL1	1.44069
SERF2	0.0363664	0.153323	0.982	0.992	1	SERF2	1.4393
CEP95	0.0363866	-0.272303	0.091	0.212	1	CEP95	1.43906
C12orf73	0.0364412	0.132157	0.145	0.051	1	C12orf73	1.43841
FBXL5	0.0364412	-0.187721	0.018	0.11	1	FBXL5	1.43841
PUM1	0.0369736	-0.270674	0.164	0.314	1	PUM1	1.43211
ZNF766	0.0370001	-0.221545	0.109	0.246	1	ZNF766	1.4318
MRPS35	0.0370019	0.242213	0.218	0.102	1	MRPS35	1.43178
LSM12	0.0370064	-0.282125	0.145	0.28	1	LSM12	1.43172
RFX7	0.0370623	0.149954	0.145	0.051	1	RFX7	1.43107
POLL	0.0370623	0.126151	0.145	0.051	1	POLL	1.43107
BCL2L11	0.0370623	-0.212908	0.018	0.11	1	BCL2L11	1.43107
MBD1	0.0370623	-0.238728	0.018	0.11	1	MBD1	1.43107
ARL6IP5	0.0374463	0.188968	0.909	0.78	1	ARL6IP5	1.42659
ATRX	0.037565	-0.220958	0.473	0.644	1	ATRX	1.42522
ZNF622	0.0375726	0.149052	0.273	0.136	1	ZNF622	1.42513
FH	0.037714	0.136018	0.182	0.076	1	FH	1.4235
ATF7IP2	0.0380108	-0.240061	0.073	0.195	1	ATF7IP2	1.42009
SDHD	0.0382174	0.217931	0.473	0.339	1	SDHD	1.41774
CKS2	0.0384774	0.250049	0.273	0.136	1	CKS2	1.41479
TRIM13	0.0384936	-0.250561	0.127	0.271	1	TRIM13	1.41461
BX890604.1	0.0385826	0.166089	0.127	0.042	1	BX890604.1	1.41361
MPHOSPH10	0.038696	0.227882	0.382	0.229	1	MPHOSPH10	1.41233
RBM26	0.0387479	0.237204	0.455	0.297	1	RBM26	1.41175
ZNF207	0.0388004	0.215174	0.655	0.525	1	ZNF207	1.41116
LASP1	0.0388231	0.284016	0.455	0.288	1	LASP1	1.41091
RPS18	0.0389139	-0.140192	1	1	1	RPS18	1.4099
ATAD2B	0.0389164	0.262478	0.291	0.153	1	ATAD2B	1.40987
MFGE8	0.0389366	-0.325353	0.091	0.22	1	MFGE8	1.40964
HLA-DQA1	0.0389794	-0.181981	0.018	0.11	1	HLA-DQA1	1.40916
RCAN1	0.0389799	0.113028	0.145	0.051	1	RCAN1	1.40916
COPS7A	0.0390135	0.208222	0.218	0.102	1	COPS7A	1.40879
UNK	0.0390168	-0.25943	0.055	0.161	1	UNK	1.40875
FUNDC2	0.0390612	-0.325701	0.109	0.229	1	FUNDC2	1.40825
RBM8A	0.0391519	0.265427	0.727	0.602	1	RBM8A	1.40725
DYRK1A	0.039337	0.251072	0.345	0.195	1	DYRK1A	1.4052
APOBEC3C	0.0394452	0.269239	0.691	0.585	1	APOBEC3C	1.40401
IKZF3	0.0394661	0.254568	0.673	0.525	1	IKZF3	1.40378
UBE2H	0.0395306	0.197201	0.218	0.102	1	UBE2H	1.40307
AFTPH	0.0395865	-0.29221	0.073	0.186	1	AFTPH	1.40245
ITGAL	0.0397334	0.246433	0.564	0.424	1	ITGAL	1.40084
ORAI2	0.0399403	-0.325769	0.291	0.432	1	ORAI2	1.39859
SMIM10L1	0.0399771	0.267519	0.418	0.263	1	SMIM10L1	1.39819
WRNIP1	0.0399942	0.180718	0.127	0.042	1	WRNIP1	1.398
GLMN	0.0405492	0.397255	0.255	0.136	1	GLMN	1.39202
WDR83	0.0405824	0.180329	0.218	0.102	1	WDR83	1.39166
ALDH3A2	0.0405824	0.174243	0.218	0.102	1	ALDH3A2	1.39166
JKAMP	0.040604	-0.264288	0.073	0.186	1	JKAMP	1.39143
ARFGAP3	0.0406825	-0.227457	0.164	0.331	1	ARFGAP3	1.39059
SESN3	0.0407163	0.102639	0.127	0.042	1	SESN3	1.39023
TPT1	0.0408018	-0.142054	1	1	1	TPT1	1.38932
LTBP3	0.04082	-0.240992	0.091	0.22	1	LTBP3	1.38913
HOPX	0.0408544	-0.212725	0.818	0.881	1	HOPX	1.38876
ICAM2	0.040958	-0.329354	0.109	0.246	1	ICAM2	1.38766
PRKAG2	0.0411599	0.168552	0.182	0.076	1	PRKAG2	1.38553
SIN3A	0.0411935	-0.243049	0.109	0.237	1	SIN3A	1.38517
ALKBH5	0.0413027	-0.226868	0.091	0.22	1	ALKBH5	1.38402
TMEM101	0.0414191	-0.220504	0.036	0.136	1	TMEM101	1.3828
ATP7A	0.0414494	0.16192	0.127	0.042	1	ATP7A	1.38248
FKBP3	0.0414755	0.208455	0.418	0.254	1	FKBP3	1.38221
PITHD1	0.041505	0.190047	0.4	0.237	1	PITHD1	1.3819
NUCKS1	0.0417298	0.320273	0.655	0.576	1	NUCKS1	1.37955
JOSD2	0.041916	0.163743	0.309	0.169	1	JOSD2	1.37762
GTF3C2	0.0421936	0.141269	0.127	0.042	1	GTF3C2	1.37475
STAT3	0.042284	0.227066	0.527	0.39	1	STAT3	1.37382
PHF20	0.0426138	0.186722	0.455	0.288	1	PHF20	1.37045
ACAP2	0.042744	0.206107	0.418	0.263	1	ACAP2	1.36912
SLC4A2	0.0429491	0.127835	0.127	0.042	1	SLC4A2	1.36705
METTL14	0.0429806	0.158999	0.182	0.076	1	METTL14	1.36673
GTF2E2	0.0429806	0.141463	0.182	0.076	1	GTF2E2	1.36673
HENMT1	0.0430315	0.201789	0.327	0.186	1	HENMT1	1.36621
IFIT2	0.0434894	0.230921	0.109	0.034	1	IFIT2	1.36162
WIPF1	0.0434915	-0.251442	0.673	0.763	1	WIPF1	1.3616
CYCS	0.0436458	0.209725	0.636	0.492	1	CYCS	1.36006
NKG7	0.0437791	0.218969	1	1	1	NKG7	1.35873
MED27	0.0437844	-0.119746	0.018	0.11	1	MED27	1.35868
TSPOAP1-AS1	0.0440352	-0.296934	0.164	0.305	1	TSPOAP1-AS1	1.3562
RPL9	0.0441186	-0.185205	0.964	0.975	1	RPL9	1.35538
LRRC40	0.0444945	0.129519	0.127	0.042	1	LRRC40	1.35169
FER	0.04451	-0.115003	0.018	0.11	1	FER	1.35154
APMAP	0.0445716	0.241407	0.636	0.449	1	APMAP	1.35094
MNAT1	0.044815	0.220566	0.364	0.22	1	MNAT1	1.34858
RAB33B	0.0452846	0.161428	0.127	0.042	1	RAB33B	1.34405
RPL41	0.0455111	-0.104851	1	1	1	RPL41	1.34188
AGPAT1	0.0455137	0.165685	0.182	0.076	1	AGPAT1	1.34186
RMND5A	0.0455137	0.147383	0.182	0.076	1	RMND5A	1.34186
RALBP1	0.0457278	-0.372999	0.309	0.415	1	RALBP1	1.33982
TACO1	0.0457704	0.147496	0.164	0.068	1	TACO1	1.33942
FOXP1	0.0458402	0.187751	0.473	0.314	1	FOXP1	1.33875
ATP6V1F	0.0459576	0.213895	0.709	0.551	1	ATP6V1F	1.33764
KLRB1	0.0459837	0.178855	0.964	0.788	1	KLRB1	1.3374
KCTD11	0.0460647	0.224022	0.109	0.034	1	KCTD11	1.33663
HNRNPR	0.0460655	0.29506	0.655	0.542	1	HNRNPR	1.33662
MAD2L1	0.046071	0.238782	0.236	0.119	1	MAD2L1	1.33657
FAM120B	0.0460865	0.115646	0.127	0.042	1	FAM120B	1.33643
KLF3	0.0461662	0.139619	0.182	0.076	1	KLF3	1.33568
SMG6	0.0462557	0.284417	0.364	0.237	1	SMG6	1.33483
SERBP1	0.0462957	0.157141	0.855	0.729	1	SERBP1	1.33446
RBM4	0.0463468	-0.29151	0.109	0.229	1	RBM4	1.33398
XRCC4	0.0464596	0.197901	0.164	0.068	1	XRCC4	1.33292
IMP3	0.0465124	0.264046	0.564	0.432	1	IMP3	1.33243
EXOSC4	0.0467578	0.214027	0.218	0.11	1	EXOSC4	1.33015
MESP1	0.0469004	0.120957	0.127	0.042	1	MESP1	1.32882
TMEM230	0.0469102	0.196246	0.6	0.449	1	TMEM230	1.32873
TRAPPC3	0.0469254	0.258701	0.327	0.203	1	TRAPPC3	1.32859
NUDT9	0.0469512	0.16555	0.109	0.034	1	NUDT9	1.32835
TNFRSF12A	0.0469512	0.153844	0.109	0.034	1	TNFRSF12A	1.32835
TSPYL4	0.0469512	0.136904	0.109	0.034	1	TSPYL4	1.32835
RBMX2	0.047209	0.177504	0.236	0.119	1	RBMX2	1.32597
DHX30	0.0476127	0.176691	0.273	0.144	1	DHX30	1.32228
CHCHD2	0.0476184	0.204143	0.964	0.907	1	CHCHD2	1.32223
PRKAG1	0.047726	0.164863	0.309	0.169	1	PRKAG1	1.32125
FAAP20	0.0477343	0.309794	0.545	0.398	1	FAAP20	1.32117
CLTC	0.0478318	0.260436	0.418	0.28	1	CLTC	1.32028
CENPT	0.0478643	0.161166	0.164	0.068	1	CENPT	1.31999
MRPL11	0.0481479	0.190316	0.455	0.322	1	MRPL11	1.31742
FAM120A	0.048178	0.15997	0.291	0.153	1	FAM120A	1.31715
VTI1B	0.0481864	0.151839	0.364	0.212	1	VTI1B	1.31708
PPP1CC	0.0482855	0.125727	0.418	0.254	1	PPP1CC	1.31618
MAPK1	0.0483871	0.256805	0.618	0.458	1	MAPK1	1.31527
CD164	0.048393	0.178248	0.691	0.602	1	CD164	1.31522
RBM23	0.0485587	-0.286071	0.182	0.314	1	RBM23	1.31373
TRMT1	0.04858	0.186025	0.164	0.068	1	TRMT1	1.31354
RXRA	0.048615	-0.147455	0.018	0.102	1	RXRA	1.31323
FCHSD2	0.048615	-0.205711	0.018	0.102	1	FCHSD2	1.31323
GTSE1	0.0487673	0.169233	0.109	0.034	1	GTSE1	1.31187
P3H1	0.0487673	0.160513	0.109	0.034	1	P3H1	1.31187
LSM14B	0.0487673	0.154796	0.109	0.034	1	LSM14B	1.31187
ACTB	0.0487741	0.168617	1	1	1	ACTB	1.31181
ANP32B	0.0488683	0.230122	0.745	0.669	1	ANP32B	1.31097
FEZ2	0.0489645	-0.273093	0.073	0.186	1	FEZ2	1.31012
ANKRD36C	0.0491644	0.22338	0.218	0.11	1	ANKRD36C	1.30835
FEZ1	0.0494148	0.141681	0.127	0.042	1	FEZ1	1.30614
PUS1	0.049435	-0.14586	0.018	0.102	1	PUS1	1.30597
CLN6	0.049435	-0.220153	0.018	0.102	1	CLN6	1.30597
RBPJ	0.0494969	-0.210739	0.473	0.627	1	RBPJ	1.30542
UHRF1	0.0496973	0.18332	0.109	0.034	1	UHRF1	1.30367
NLRX1	0.0496973	0.119358	0.109	0.034	1	NLRX1	1.30367
ICE2	0.049782	-0.257858	0.073	0.178	1	ICE2	1.30293
C6orf226	0.0500382	0.153175	0.164	0.068	1	C6orf226	1.3007
APTX	0.0500734	-0.159936	0.036	0.136	1	APTX	1.30039
SLC25A6	0.050132	0.149176	0.909	0.771	1	SLC25A6	1.29988
BNIP3	0.0502665	-0.164606	0.018	0.102	1	BNIP3	1.29872
VPS11	0.0502665	-0.185269	0.018	0.102	1	VPS11	1.29872
ETS2	0.0502776	0.102649	0.127	0.042	1	ETS2	1.29863
SMAD3	0.0503779	0.194769	0.273	0.144	1	SMAD3	1.29776
MPI	0.050642	0.126189	0.109	0.034	1	MPI	1.29549
GIN1	0.050642	0.12398	0.109	0.034	1	GIN1	1.29549
RETREG3	0.0510489	0.0994963	0.2	0.085	1	RETREG3	1.29201
FAM207A	0.0510513	0.176412	0.291	0.161	1	FAM207A	1.29199
NRBF2	0.0513691	-0.284961	0.145	0.271	1	NRBF2	1.2893
LMNB1	0.0513799	0.189236	0.236	0.119	1	LMNB1	1.28921
AP5Z1	0.051533	0.157735	0.164	0.068	1	AP5Z1	1.28791
MRPL41	0.051556	0.232537	0.636	0.458	1	MRPL41	1.28772
BCS1L	0.0516018	0.114709	0.109	0.034	1	BCS1L	1.28734
C11orf58	0.0516691	-0.258638	0.691	0.771	1	C11orf58	1.28677
DYM	0.0516854	-0.184597	0.055	0.161	1	DYM	1.28663
NAP1L1	0.051709	0.264767	0.655	0.534	1	NAP1L1	1.28643
NPRL3	0.0518105	0.142794	0.218	0.102	1	NPRL3	1.28558
GRPEL1	0.0518538	-0.203254	0.091	0.212	1	GRPEL1	1.28522
INPP4B	0.0519648	-0.116953	0.018	0.102	1	INPP4B	1.28429
MIF	0.0519751	0.245277	0.564	0.424	1	MIF	1.2842
AGFG1	0.0520277	0.28082	0.273	0.161	1	AGFG1	1.28377
SIKE1	0.0522354	-0.233392	0.127	0.246	1	SIKE1	1.28204
PSMD1	0.052239	0.278795	0.291	0.178	1	PSMD1	1.28201
SLC25A24	0.052318	-0.248334	0.073	0.178	1	SLC25A24	1.28135
ABHD3	0.0523895	-0.247681	0.109	0.229	1	ABHD3	1.28076
UBTF	0.0524768	-0.270492	0.291	0.432	1	UBTF	1.28003
HLA-DRB1	0.0525156	-0.306085	0.218	0.356	1	HLA-DRB1	1.27971
TARS2	0.0525767	0.104951	0.109	0.034	1	TARS2	1.27921
MAFF	0.0528318	-0.23698	0.018	0.102	1	MAFF	1.2771
PARP10	0.0529686	0.269324	0.218	0.11	1	PARP10	1.27598
YJU2	0.0530806	0.207872	0.236	0.127	1	YJU2	1.27506
USP14	0.0532468	-0.270862	0.218	0.347	1	USP14	1.27371
TOP3A	0.053567	0.0897451	0.109	0.034	1	TOP3A	1.2711
MAVS	0.0536259	0.299256	0.218	0.11	1	MAVS	1.27063
NDUFAF1	0.0537833	-0.166429	0.036	0.136	1	NDUFAF1	1.26935
GABARAPL1	0.053795	0.167859	0.382	0.246	1	GABARAPL1	1.26926
TRBC1	0.0538907	0.223267	0.655	0.492	1	TRBC1	1.26849
ACTG1	0.054035	0.175648	1	1	1	ACTG1	1.26732
NCAM1	0.0542287	-0.195077	0.164	0.305	1	NCAM1	1.26577
BLVRB	0.0544527	0.141646	0.2	0.093	1	BLVRB	1.26398
WASHC5	0.0545729	0.0716746	0.109	0.034	1	WASHC5	1.26302
MIS18A	0.054602	-0.17532	0.018	0.102	1	MIS18A	1.26279
FBXO7	0.0546098	0.225415	0.327	0.203	1	FBXO7	1.26273
HLA-A	0.0546479	0.136911	1	1	1	HLA-A	1.26243
TNFRSF1A	0.0549376	0.211818	0.345	0.212	1	TNFRSF1A	1.26013
GALK2	0.0551641	0.146638	0.218	0.102	1	GALK2	1.25834
ZNF605	0.0552575	0.202413	0.145	0.059	1	ZNF605	1.25761
ZNF397	0.0556348	-0.18394	0.109	0.246	1	ZNF397	1.25465
CHPT1	0.0556685	0.120106	0.309	0.161	1	CHPT1	1.25439
NUDT1	0.0557095	0.125556	0.345	0.195	1	NUDT1	1.25407
SNU13	0.0559832	0.233921	0.691	0.576	1	SNU13	1.25194
MINDY2	0.0561645	0.237691	0.255	0.136	1	MINDY2	1.25054
RPL30	0.0563105	-0.120037	1	1	1	RPL30	1.24941
PARK7	0.0564199	0.127289	0.873	0.822	1	PARK7	1.24857
EIF3E	0.0565197	0.13049	0.764	0.636	1	EIF3E	1.2478
CAPG	0.0565889	-0.276722	0.382	0.5	1	CAPG	1.24727
VPS18	0.0566318	0.0658464	0.109	0.034	1	VPS18	1.24694
NIT1	0.0566513	-0.220194	0.036	0.127	1	NIT1	1.24679
MRPS11	0.0567783	0.254513	0.382	0.237	1	MRPS11	1.24582
CIAPIN1	0.0570148	0.225933	0.2	0.102	1	CIAPIN1	1.24401
NPC1	0.0570619	0.11241	0.164	0.068	1	NPC1	1.24365
IFNGR1	0.0574825	-0.195446	0.164	0.322	1	IFNGR1	1.24046
C18orf25	0.0577146	0.167476	0.218	0.11	1	C18orf25	1.23871
KLHL6	0.0578699	0.12458	0.236	0.119	1	KLHL6	1.23755
NDUFAB1	0.0579183	0.177293	0.636	0.542	1	NDUFAB1	1.23718
TOP1	0.0579824	0.245105	0.582	0.407	1	TOP1	1.2367
SHLD2	0.0580845	0.139635	0.2	0.093	1	SHLD2	1.23594
GLRX2	0.0581012	0.149217	0.255	0.136	1	GLRX2	1.23582
LINC02001	0.0582782	-0.262177	0.055	0.153	1	LINC02001	1.23449
HSF2	0.0582911	-0.119145	0.018	0.102	1	HSF2	1.2344
AP1G2	0.0582988	0.199828	0.182	0.085	1	AP1G2	1.23434
NUBP1	0.0584206	0.201877	0.218	0.11	1	NUBP1	1.23343
RTN4	0.0589591	0.205667	0.582	0.432	1	RTN4	1.22945
RPS14	0.0591016	-0.10279	1	1	1	RPS14	1.2284
TMEM187	0.0591525	-0.150719	0.036	0.127	1	TMEM187	1.22803
MT-ND1	0.059321	-0.104492	1	1	1	MT-ND1	1.22679
RPS15	0.0593211	-0.120791	1	1	1	RPS15	1.22679
ZWINT	0.0593603	0.320155	0.164	0.076	1	ZWINT	1.2265
SMG7	0.0594229	0.146097	0.255	0.136	1	SMG7	1.22605
POC5	0.0596392	0.131246	0.145	0.059	1	POC5	1.22447
PLEKHO2	0.0598765	0.159831	0.182	0.085	1	PLEKHO2	1.22274
ZC3H14	0.060093	0.183426	0.255	0.136	1	ZC3H14	1.22118
SYVN1	0.0604371	0.107334	0.164	0.068	1	SYVN1	1.2187
ATP10A	0.0605493	0.162222	0.145	0.059	1	ATP10A	1.21789
P4HA1	0.0605493	0.139667	0.145	0.059	1	P4HA1	1.21789
IFI44	0.0606785	0.179678	0.182	0.085	1	IFI44	1.21696
CFAP298	0.060681	0.174847	0.327	0.195	1	CFAP298	1.21695
TXNL4A	0.0608766	-0.296137	0.345	0.458	1	TXNL4A	1.21555
SYNGR1	0.0610186	0.175325	0.327	0.186	1	SYNGR1	1.21454
RPS3A	0.0611006	-0.11701	0.982	1	1	RPS3A	1.21395
SMARCD2	0.0611329	0.11035	0.2	0.093	1	SMARCD2	1.21373
SLC15A4	0.0611692	0.230978	0.291	0.169	1	SLC15A4	1.21347
CCNDBP1	0.0612925	0.234433	0.527	0.381	1	CCNDBP1	1.21259
MRPS25	0.0613168	0.12354	0.218	0.11	1	MRPS25	1.21242
SELENOO	0.0614708	0.157996	0.145	0.059	1	SELENOO	1.21133
RPL13	0.0617791	-0.100296	1	1	1	RPL13	1.20916
KRR1	0.0621129	0.213078	0.455	0.305	1	KRR1	1.20682
LARP1	0.0621621	0.139723	0.309	0.178	1	LARP1	1.20647
NDC80	0.0621849	0.188006	0.127	0.051	1	NDC80	1.20632
SERPINE2	0.0623093	0.19765	0.182	0.085	1	SERPINE2	1.20545
ACYP2	0.0624039	0.148958	0.145	0.059	1	ACYP2	1.20479
MRPL45	0.0624039	0.127094	0.145	0.059	1	MRPL45	1.20479
FAM98A	0.0624039	0.0909359	0.145	0.059	1	FAM98A	1.20479
ZNF281	0.0627022	0.210522	0.327	0.203	1	ZNF281	1.20272
C12orf29	0.0630104	-0.201916	0.055	0.153	1	C12orf29	1.20059
TRIM52	0.0630104	-0.218271	0.055	0.153	1	TRIM52	1.20059
PDPK1	0.0631673	0.193817	0.236	0.127	1	PDPK1	1.19951
SMCR8	0.0631913	0.233057	0.127	0.051	1	SMCR8	1.19934
LCORL	0.0635246	-0.151307	0.036	0.127	1	LCORL	1.19706
ELOF1	0.0640777	-0.254716	0.145	0.254	1	ELOF1	1.19329
ZNF714	0.0643053	0.167201	0.145	0.059	1	ZNF714	1.19175
NTPCR	0.0645149	0.172718	0.164	0.076	1	NTPCR	1.19034
FKBP2	0.0645216	0.335393	0.618	0.525	1	FKBP2	1.1903
GALK1	0.0645587	0.259882	0.218	0.119	1	GALK1	1.19005
PLEKHN1	0.0646567	-0.170558	0.055	0.153	1	PLEKHN1	1.18939
SELPLG	0.0646591	0.20722	0.364	0.229	1	SELPLG	1.18937
ARL2	0.064661	0.147525	0.418	0.263	1	ARL2	1.18936
RABIF	0.0647381	0.098621	0.218	0.102	1	RABIF	1.18884
RPS28	0.0647922	-0.117471	1	1	1	RPS28	1.18848
BAX	0.0650068	0.248778	0.636	0.534	1	BAX	1.18704
ANKRD28	0.0651286	0.130127	0.2	0.093	1	ANKRD28	1.18623
ZNF75A	0.0651324	0.161124	0.382	0.229	1	ZNF75A	1.1862
RPL17	0.0651481	-0.213931	0.255	0.39	1	RPL17	1.1861
TMEM102	0.0652444	0.208063	0.127	0.051	1	TMEM102	1.18546
VHL	0.0653272	0.200154	0.255	0.144	1	VHL	1.18491
CNBP	0.0656455	0.217486	0.691	0.559	1	CNBP	1.18279
CCDC115	0.0660422	0.185926	0.255	0.144	1	CCDC115	1.18018
DLD	0.0661098	0.188868	0.236	0.127	1	DLD	1.17973
UBXN2B	0.0662737	-0.157559	0.036	0.127	1	UBXN2B	1.17866
ZFX	0.0665341	0.202609	0.382	0.246	1	ZFX	1.17696
ANKRD11	0.0666394	0.143457	0.709	0.551	1	ANKRD11	1.17627
LAGE3	0.066694	0.265753	0.418	0.28	1	LAGE3	1.17591
ZFR	0.0671061	0.163565	0.364	0.229	1	ZFR	1.17324
RLIM	0.0671926	-0.198299	0.055	0.153	1	RLIM	1.17268
HIRIP3	0.0674917	0.151643	0.255	0.144	1	HIRIP3	1.17075
CSDE1	0.0677588	0.211802	0.6	0.449	1	CSDE1	1.16903
PIGT	0.0678013	0.227442	0.291	0.169	1	PIGT	1.16876
RPF2	0.0678723	0.214508	0.2	0.102	1	RPF2	1.16831
ADAM10	0.0679049	0.118694	0.345	0.212	1	ADAM10	1.1681
MIIP	0.0681603	-0.169394	0.036	0.127	1	MIIP	1.16647
MT-CO1	0.0681718	-0.0930123	1	1	1	MT-CO1	1.1664
EMC8	0.0682385	0.155621	0.273	0.153	1	EMC8	1.16597
ARMC10	0.0682694	0.151061	0.218	0.11	1	ARMC10	1.16577
CUL5	0.0684122	-0.248614	0.145	0.263	1	CUL5	1.16487
ADGRG1	0.0684271	0.302622	0.127	0.051	1	ADGRG1	1.16477
XKR8	0.0684271	0.158552	0.127	0.051	1	XKR8	1.16477
RBM28	0.0685496	0.213105	0.345	0.212	1	RBM28	1.164
FBXO6	0.0686466	0.229987	0.273	0.161	1	FBXO6	1.16338
RPS27L	0.0686649	0.175229	0.727	0.602	1	RPS27L	1.16326
PDIA3	0.0691339	0.245132	0.709	0.653	1	PDIA3	1.16031
CDK11A	0.0691948	0.227194	0.255	0.153	1	CDK11A	1.15993
NOB1	0.0691989	0.159117	0.182	0.085	1	NOB1	1.1599
SMARCE1	0.0693193	0.0973063	0.291	0.161	1	SMARCE1	1.15915
VMA21	0.0694319	0.211143	0.309	0.186	1	VMA21	1.15844
AGFG2	0.0695159	0.179195	0.127	0.051	1	AGFG2	1.15792
CBR1	0.0695858	0.191072	0.327	0.195	1	CBR1	1.15748
HLA-DPA1	0.0698803	-0.347605	0.364	0.466	1	HLA-DPA1	1.15565
STAMBPL1	0.0698993	0.141514	0.218	0.11	1	STAMBPL1	1.15553
EBNA1BP2	0.0699025	0.179137	0.291	0.169	1	EBNA1BP2	1.15551
SLC25A1	0.0699025	0.1667	0.291	0.169	1	SLC25A1	1.15551
DYNLT3	0.0700518	-0.317495	0.164	0.263	1	DYNLT3	1.15458
RBMS1	0.0700563	0.200073	0.473	0.314	1	RBMS1	1.15455
ERCC6	0.0701025	-0.288457	0.055	0.144	1	ERCC6	1.15427
SNRPD3	0.0702038	-0.193786	0.473	0.695	1	SNRPD3	1.15364
LRRC47	0.0702983	0.0789119	0.145	0.059	1	LRRC47	1.15305
NCOA7	0.0704007	-0.277687	0.145	0.246	1	NCOA7	1.15242
AUP1	0.0706214	0.202365	0.4	0.271	1	AUP1	1.15106
SLC25A5	0.0706223	0.106404	0.709	0.559	1	SLC25A5	1.15106
RPS3	0.0706734	-0.123685	1	1	1	RPS3	1.15074
SLC25A33	0.0708592	-0.179701	0.036	0.119	1	SLC25A33	1.1496
ATP9B	0.0709898	0.216957	0.164	0.076	1	ATP9B	1.1488
SFI1	0.0711186	-0.260186	0.127	0.237	1	SFI1	1.14802
MAP7D3	0.0711494	0.291896	0.182	0.093	1	MAP7D3	1.14783
VPS50	0.0713404	0.0906761	0.145	0.059	1	VPS50	1.14666
SAMHD1	0.0716629	0.23874	0.455	0.331	1	SAMHD1	1.14471
DDX5	0.0716752	-0.154657	0.945	0.949	1	DDX5	1.14463
SPG21	0.0719387	-0.224905	0.055	0.144	1	SPG21	1.14304
TECR	0.0720727	-0.222771	0.255	0.398	1	TECR	1.14223
EEF1E1	0.0721238	0.197951	0.309	0.195	1	EEF1E1	1.14192
BTG3	0.0721943	0.215089	0.255	0.153	1	BTG3	1.1415
PFDN4	0.0723149	0.210976	0.4	0.263	1	PFDN4	1.14077
GFOD1	0.072334	0.248543	0.236	0.127	1	GFOD1	1.14066
CNPY4	0.0723951	0.0674554	0.145	0.059	1	CNPY4	1.14029
OSBP	0.0725156	0.198034	0.218	0.119	1	OSBP	1.13957
ZDHHC24	0.0725445	0.292094	0.291	0.178	1	ZDHHC24	1.1394
CCL3	0.0726695	0.301506	0.273	0.153	1	CCL3	1.13865
YME1L1	0.072814	0.183709	0.345	0.22	1	YME1L1	1.13779
TTC31	0.072868	0.145527	0.127	0.051	1	TTC31	1.13746
EFL1	0.072868	0.141814	0.127	0.051	1	EFL1	1.13746
PLA2G16	0.0728857	0.237289	0.582	0.432	1	PLA2G16	1.13736
SLC30A9	0.0729347	0.17728	0.164	0.076	1	SLC30A9	1.13707
KRI1	0.072956	0.0953055	0.291	0.161	1	KRI1	1.13694
ARL6IP1	0.0731395	0.308139	0.327	0.203	1	ARL6IP1	1.13585
APOL1	0.0732635	-0.142087	0.091	0.203	1	APOL1	1.13511
DERA	0.0734305	0.141627	0.273	0.153	1	DERA	1.13412
RPS15A	0.0737742	-0.0879128	1	1	1	RPS15A	1.1321
HECA	0.0740708	-0.207631	0.091	0.203	1	HECA	1.13035
AP3M1	0.0741996	0.199293	0.218	0.119	1	AP3M1	1.1296
SEC31A	0.0744155	-0.245131	0.218	0.331	1	SEC31A	1.12834
MXD4	0.0746903	0.329014	0.509	0.432	1	MXD4	1.12674
GIGYF1	0.0748051	0.167779	0.2	0.102	1	GIGYF1	1.12607
AGPS	0.0750535	0.188789	0.218	0.119	1	AGPS	1.12463
BRD1	0.0751368	-0.236262	0.109	0.212	1	BRD1	1.12415
MARCKSL1	0.0751754	0.115774	0.127	0.051	1	MARCKSL1	1.12392
TMBIM6	0.0753264	0.189144	0.891	0.763	1	TMBIM6	1.12305
TRAPPC2L	0.0754242	0.146796	0.382	0.237	1	TRAPPC2L	1.12249
HMGN1	0.0754521	0.231923	0.764	0.627	1	HMGN1	1.12233
LINC00996	0.0754605	-0.37592	0.273	0.39	1	LINC00996	1.12228
RPS27A	0.0756336	-0.105222	1	1	1	RPS27A	1.12129
SPRTN	0.075711	0.184896	0.2	0.102	1	SPRTN	1.12084
GINM1	0.0758742	0.27665	0.291	0.186	1	GINM1	1.11991
WDR55	0.0759154	0.183292	0.218	0.119	1	WDR55	1.11967
P4HB	0.0759911	0.262876	0.473	0.373	1	P4HB	1.11924
CHD8	0.0762512	0.22449	0.345	0.22	1	CHD8	1.11775
TAX1BP3	0.0763512	0.117774	0.127	0.051	1	TAX1BP3	1.11718
ELF1	0.0764463	0.223031	0.564	0.415	1	ELF1	1.11664
43895	0.076541	-0.210869	0.073	0.169	1	43895	1.11611
NOM1	0.0767021	0.104885	0.182	0.085	1	NOM1	1.11519
A1BG	0.0767415	-0.170132	0.073	0.178	1	A1BG	1.11497
PSMA7	0.0768689	0.143588	0.927	0.898	1	PSMA7	1.11425
EXOSC7	0.076885	0.189079	0.273	0.161	1	EXOSC7	1.11416
COX7B	0.0769386	0.159332	0.673	0.551	1	COX7B	1.11386
CCM2	0.0770372	-0.211731	0.364	0.508	1	CCM2	1.1133
AP003774.4	0.077204	-0.0649126	0.036	0.127	1	AP003774.4	1.11236
LAMTOR1	0.0772881	-0.228595	0.436	0.593	1	LAMTOR1	1.11189
NFYB	0.0773075	0.149165	0.345	0.22	1	NFYB	1.11178
FLAD1	0.0773733	-0.164908	0.091	0.203	1	FLAD1	1.11141
BYSL	0.077542	0.111033	0.127	0.051	1	BYSL	1.11046
MAPKAPK5	0.0775496	0.171231	0.2	0.102	1	MAPKAPK5	1.11042
FAM118A	0.0775845	-0.288913	0.327	0.432	1	FAM118A	1.11022
EIF4EBP2	0.0776634	0.232945	0.218	0.119	1	EIF4EBP2	1.10978
DCBLD1	0.077685	-0.196844	0.055	0.144	1	DCBLD1	1.10966
PRDX6	0.0778643	0.15047	0.6	0.534	1	PRDX6	1.10866
DERL2	0.0779091	-0.302432	0.255	0.373	1	DERL2	1.10841
SNAPC2	0.0779882	0.076846	0.164	0.076	1	SNAPC2	1.10797
ARPC5	0.0780234	0.185039	0.836	0.746	1	ARPC5	1.10778
TIMM13	0.0781541	0.245897	0.327	0.212	1	TIMM13	1.10705
EPB41	0.0782083	-0.206275	0.4	0.551	1	EPB41	1.10675
E2F1	0.0782425	0.177678	0.145	0.068	1	E2F1	1.10656
ZNF141	0.0783621	-0.183581	0.073	0.169	1	ZNF141	1.10589
ICE1	0.0783865	-0.205248	0.109	0.212	1	ICE1	1.10576
GDI1	0.0786781	0.0977312	0.182	0.085	1	GDI1	1.10415
RGS10	0.0787256	-0.209678	0.364	0.475	1	RGS10	1.10388
TPX2	0.0787479	0.213897	0.127	0.051	1	TPX2	1.10376
TOGARAM2	0.0787479	0.101535	0.127	0.051	1	TOGARAM2	1.10376
STOML2	0.0792255	0.211555	0.382	0.271	1	STOML2	1.10113
DCTN1	0.0794245	0.16864	0.2	0.102	1	DCTN1	1.10005
DDX58	0.0794245	0.134558	0.2	0.102	1	DDX58	1.10005
MED31	0.0794441	0.203702	0.218	0.119	1	MED31	1.09994
ACSL5	0.0799691	0.111904	0.127	0.051	1	ACSL5	1.09708
CD9	0.0799877	0.101521	0.345	0.203	1	CD9	1.09698
PSMD3	0.0801542	0.176465	0.309	0.195	1	PSMD3	1.09607
EEA1	0.0801606	-0.187094	0.109	0.22	1	EEA1	1.09604
MRPS7	0.0801839	0.155787	0.527	0.39	1	MRPS7	1.09591
SKP1	0.0802111	-0.125033	0.909	0.915	1	SKP1	1.09577
MTMR9	0.0808667	0.19648	0.291	0.178	1	MTMR9	1.09223
SNAP23	0.0808871	-0.245121	0.127	0.229	1	SNAP23	1.09212
DCUN1D1	0.0809951	0.216274	0.255	0.153	1	DCUN1D1	1.09154
CSNK2B	0.0811838	0.128982	0.582	0.424	1	CSNK2B	1.09053
PHB2	0.0812008	0.230083	0.527	0.398	1	PHB2	1.09044
ZNF672	0.0812055	0.117125	0.127	0.051	1	ZNF672	1.09041
TRG-AS1	0.0814503	0.227821	0.436	0.322	1	TRG-AS1	1.08911
TTN	0.0815929	-0.164771	0.036	0.119	1	TTN	1.08835
NDFIP2	0.0816602	0.225728	0.382	0.246	1	NDFIP2	1.08799
ERCC6L2	0.0817196	0.10053	0.182	0.085	1	ERCC6L2	1.08767
DDX23	0.0818126	0.124099	0.327	0.195	1	DDX23	1.08718
NIN	0.0818843	0.179593	0.309	0.186	1	NIN	1.0868
RPL3	0.0820145	-0.112069	1	0.992	1	RPL3	1.08611
NCBP3	0.082117	0.185551	0.455	0.314	1	NCBP3	1.08557
PHF19	0.0822055	0.214585	0.345	0.229	1	PHF19	1.0851
IL9R	0.0822332	0.105593	0.164	0.076	1	IL9R	1.08495
RUVBL2	0.0823057	0.136577	0.2	0.102	1	RUVBL2	1.08457
FUNDC1	0.0823057	0.0944182	0.2	0.102	1	FUNDC1	1.08457
SNRNP48	0.0824727	0.0647421	0.145	0.059	1	SNRNP48	1.08369
TOMM20	0.0825128	-0.203012	0.364	0.483	1	TOMM20	1.08348
CD38	0.082544	0.265315	0.545	0.415	1	CD38	1.08331
GCN1	0.0826417	0.213633	0.182	0.093	1	GCN1	1.0828
DOK1	0.0827352	-0.184695	0.036	0.119	1	DOK1	1.08231
HLA-DMB	0.0827544	-0.17094	0.055	0.144	1	HLA-DMB	1.08221
NORAD	0.082841	0.166213	0.291	0.169	1	NORAD	1.08175
SFSWAP	0.082841	0.165765	0.291	0.169	1	SFSWAP	1.08175
SUMO1	0.0831735	0.193624	0.691	0.61	1	SUMO1	1.08002
SGMS1	0.0833232	0.13622	0.164	0.076	1	SGMS1	1.07923
RELA	0.0834651	-0.191209	0.091	0.195	1	RELA	1.0785
WWC3	0.083725	0.131591	0.127	0.051	1	WWC3	1.07714
DGKZ	0.0837862	0.0739055	0.582	0.381	1	DGKZ	1.07683
RHBDF2	0.0838905	-0.176406	0.036	0.119	1	RHBDF2	1.07629
MRE11	0.0839282	0.0949979	0.273	0.153	1	MRE11	1.07609
CHMP1B	0.08412	0.0875926	0.218	0.11	1	CHMP1B	1.0751
SPON2	0.0842648	0.233328	0.109	0.042	1	SPON2	1.07435
PGRMC1	0.0843759	-0.198634	0.091	0.195	1	PGRMC1	1.07378
DDOST	0.0844299	0.190454	0.455	0.347	1	DDOST	1.0735
SLF2	0.0844832	0.131375	0.291	0.169	1	SLF2	1.07323
NCK1	0.0846076	0.269285	0.382	0.28	1	NCK1	1.07259
ATAD5	0.0846959	0.186298	0.182	0.093	1	ATAD5	1.07214
CLASP2	0.0850082	0.100604	0.127	0.051	1	CLASP2	1.07054
YWHAG	0.0850588	-0.111967	0.036	0.119	1	YWHAG	1.07028
CORO1B	0.0852433	0.245514	0.236	0.136	1	CORO1B	1.06934
FADD	0.0852947	-0.194525	0.091	0.195	1	FADD	1.06908
RASSF5	0.0855175	0.229622	0.436	0.322	1	RASSF5	1.06794
CDKN2C	0.0855383	0.109455	0.164	0.076	1	CDKN2C	1.06784
ALDOC	0.0856596	0.181777	0.109	0.042	1	ALDOC	1.06722
SEC22A	0.0856596	0.119709	0.109	0.042	1	SEC22A	1.06722
SLC35E1	0.0861536	-0.238404	0.091	0.186	1	SLC35E1	1.06473
COQ3	0.0863074	0.0817998	0.127	0.051	1	COQ3	1.06395
ATP6V1E1	0.0864467	0.116135	0.364	0.229	1	ATP6V1E1	1.06325
TRAF3IP1	0.0866636	0.148139	0.164	0.076	1	TRAF3IP1	1.06216
ATG4D	0.0866636	0.136735	0.164	0.076	1	ATG4D	1.06216
RGL4	0.087013	0.137357	0.255	0.144	1	RGL4	1.06042
EXOG	0.0870358	-0.189194	0.109	0.22	1	EXOG	1.0603
IGF2R	0.0870773	0.189424	0.236	0.136	1	IGF2R	1.0601
SMAP1	0.0872835	0.172954	0.436	0.305	1	SMAP1	1.05907
LINC00909	0.0872957	0.225125	0.2	0.102	1	LINC00909	1.05901
RPL11	0.0873072	-0.0873814	1	0.983	1	RPL11	1.05895
PIGG	0.0876225	0.10516	0.127	0.051	1	PIGG	1.05738
GALNT2	0.0876225	0.0745908	0.127	0.051	1	GALNT2	1.05738
GTF3C6	0.087701	-0.214223	0.364	0.5	1	GTF3C6	1.057
SRSF4	0.0879342	0.167751	0.491	0.381	1	SRSF4	1.05584
H2AFY	0.0879383	0.224515	0.527	0.39	1	H2AFY	1.05582
DNAJB2	0.0880061	0.176935	0.236	0.136	1	DNAJB2	1.05549
RIOK3	0.0880712	0.190624	0.309	0.195	1	RIOK3	1.05517
HSPA5	0.0881036	0.465551	0.582	0.466	1	HSPA5	1.05501
EIF5B	0.0881323	0.231659	0.564	0.458	1	EIF5B	1.05487
PTEN	0.088141	0.191674	0.327	0.203	1	PTEN	1.05482
APH1B	0.088505	0.140236	0.109	0.042	1	APH1B	1.05303
PLAA	0.088505	0.131683	0.109	0.042	1	PLAA	1.05303
APOBEC3H	0.0885172	0.158456	0.273	0.161	1	APOBEC3H	1.05297
PPP1CA	0.0885604	0.1952	0.709	0.661	1	PPP1CA	1.05276
POLR2M	0.0886428	0.194755	0.145	0.068	1	POLR2M	1.05236
DARS	0.0889392	0.150619	0.345	0.22	1	DARS	1.05091
CLSPN	0.08895	0.181095	0.164	0.076	1	CLSPN	1.05085
CPD	0.08895	0.0982931	0.164	0.076	1	CPD	1.05085
COG5	0.08895	0.0878442	0.164	0.076	1	COG5	1.05085
RDH11	0.0893855	0.0691475	0.309	0.178	1	RDH11	1.04873
ELP4	0.0898641	0.193824	0.145	0.068	1	ELP4	1.04641
TMEM87B	0.089956	0.141594	0.109	0.042	1	TMEM87B	1.04597
PRKDC	0.0899862	0.228841	0.491	0.381	1	PRKDC	1.04582
CPSF6	0.0901982	0.201654	0.309	0.203	1	CPSF6	1.0448
RAB27A	0.0902299	0.237985	0.545	0.373	1	RAB27A	1.04465
ZNF276	0.0902371	0.198514	0.309	0.178	1	ZNF276	1.04461
SELL	0.0903487	-0.352709	0.182	0.288	1	SELL	1.04408
RAB11B	0.0905018	0.189271	0.327	0.212	1	RAB11B	1.04334
TTC9C	0.0908369	0.179774	0.218	0.119	1	TTC9C	1.04174
PSMC5	0.0908441	0.189953	0.545	0.441	1	PSMC5	1.0417
SNAPC5	0.0909711	0.13824	0.273	0.153	1	SNAPC5	1.0411
FAF2	0.0909787	0.0995438	0.236	0.127	1	FAF2	1.04106
PPP2R2D	0.091099	0.161239	0.145	0.068	1	PPP2R2D	1.04049
WDR76	0.0911074	0.235963	0.182	0.093	1	WDR76	1.04045
CCDC91	0.0911615	-0.225822	0.182	0.288	1	CCDC91	1.04019
DDRGK1	0.0911714	0.285802	0.418	0.297	1	DDRGK1	1.04014
MAP7D1	0.0912229	-0.17334	0.2	0.339	1	MAP7D1	1.0399
SNAP47	0.09142	-0.14498	0.055	0.144	1	SNAP47	1.03896
TFAP4	0.0914262	0.128142	0.109	0.042	1	TFAP4	1.03893
RWDD4	0.0915692	0.172319	0.255	0.153	1	RWDD4	1.03825
MSMO1	0.0916052	0.159741	0.255	0.144	1	MSMO1	1.03808
ARL14EP	0.0920503	0.180492	0.418	0.28	1	ARL14EP	1.03597
ZAP70	0.0920548	0.160633	0.4	0.28	1	ZAP70	1.03595
RNF38	0.0923475	-0.116007	0.036	0.119	1	RNF38	1.03457
COASY	0.0923588	-0.152316	0.036	0.11	1	COASY	1.03452
PDZD11	0.0925466	0.123244	0.255	0.144	1	PDZD11	1.03364
PTPRJ	0.0925621	0.159814	0.291	0.178	1	PTPRJ	1.03357
SENP7	0.0927834	0.0967622	0.4	0.271	1	SENP7	1.03253
AL138724.1	0.0929155	0.15366	0.109	0.042	1	AL138724.1	1.03191
C18orf32	0.0929155	0.107562	0.109	0.042	1	C18orf32	1.03191
AC025164.1	0.0929397	-0.179346	0.091	0.195	1	AC025164.1	1.0318
MT2A	0.0933	0.181125	0.6	0.432	1	MT2A	1.03012
ATP13A3	0.0934764	0.162557	0.218	0.127	1	ATP13A3	1.0293
C1orf35	0.0935693	0.287604	0.309	0.203	1	C1orf35	1.02887
TOP2A	0.0936097	0.560421	0.145	0.068	1	TOP2A	1.02868
PDK3	0.0936097	0.15613	0.145	0.068	1	PDK3	1.02868
MANEA-DT	0.0936588	-0.190355	0.036	0.11	1	MANEA-DT	1.02845
LYPLAL1	0.0936967	-0.135775	0.055	0.144	1	LYPLAL1	1.02828
GABPA	0.0936967	-0.176271	0.055	0.144	1	GABPA	1.02828
NOL10	0.0944122	-0.174726	0.055	0.136	1	NOL10	1.02497
CCNB1	0.0944243	0.233577	0.109	0.042	1	CCNB1	1.02492
UTP14C	0.0944243	0.142114	0.109	0.042	1	UTP14C	1.02492
CAD	0.0944243	0.095516	0.109	0.042	1	CAD	1.02492
DEPDC5	0.0944424	0.0581603	0.127	0.051	1	DEPDC5	1.02483
TWISTNB	0.0947333	0.171926	0.345	0.229	1	TWISTNB	1.0235
AKAP5	0.094844	0.171589	0.273	0.161	1	AKAP5	1.02299
TAPBPL	0.094879	0.0884052	0.164	0.076	1	TAPBPL	1.02283
PLPP5	0.0948857	0.120735	0.145	0.068	1	PLPP5	1.0228
TP53BP1	0.0949735	-0.176851	0.036	0.11	1	TP53BP1	1.0224
SPPL2B	0.0949735	-0.200213	0.036	0.11	1	SPPL2B	1.0224
CCPG1	0.0950532	-0.229304	0.182	0.297	1	CCPG1	1.02203
GRSF1	0.0954175	-0.197836	0.109	0.212	1	GRSF1	1.02037
PLEKHF1	0.0954412	0.224948	0.418	0.288	1	PLEKHF1	1.02026
GMPS	0.0955187	0.185963	0.327	0.212	1	GMPS	1.01991
RAB11FIP2	0.0955945	0.198236	0.182	0.093	1	RAB11FIP2	1.01957
CSNK1G1	0.0956013	-0.21184	0.055	0.136	1	CSNK1G1	1.01954
GFER	0.0957277	0.14642	0.236	0.136	1	GFER	1.01896
ZNF32	0.0958097	0.262273	0.273	0.178	1	ZNF32	1.01859
NAB1	0.0959527	0.0754328	0.109	0.042	1	NAB1	1.01794
IL18RAP	0.0961423	0.219164	0.291	0.178	1	IL18RAP	1.01709
SPAG9	0.096376	0.240592	0.327	0.212	1	SPAG9	1.01603
TRIM11	0.0963901	-0.153964	0.109	0.212	1	TRIM11	1.01597
THRAP3	0.0966013	0.199834	0.727	0.627	1	THRAP3	1.01502
INTS10	0.09673	0.172321	0.236	0.136	1	INTS10	1.01444
EIF3D	0.0967304	0.19328	0.673	0.534	1	EIF3D	1.01444
ZNF507	0.0967435	0.124344	0.182	0.093	1	ZNF507	1.01438
CYLD	0.0968309	0.22175	0.564	0.424	1	CYLD	1.01399
PKD1	0.0975008	0.109743	0.109	0.042	1	PKD1	1.01099
PIDD1	0.0975008	0.0928318	0.109	0.042	1	PIDD1	1.01099
SLC39A7	0.0975814	0.186727	0.218	0.127	1	SLC39A7	1.01063
HACD3	0.0976641	0.148209	0.273	0.161	1	HACD3	1.01026
TRIOBP	0.0979908	0.0776593	0.236	0.127	1	TRIOBP	1.00881
WDR41	0.0980154	-0.199976	0.055	0.136	1	WDR41	1.00871
PNKD	0.0981055	-0.267092	0.2	0.305	1	PNKD	1.00831
SMIM37	0.0984491	-0.200387	0.182	0.297	1	SMIM37	1.00679
ECH1	0.0985001	0.128337	0.582	0.424	1	ECH1	1.00656
RPS6KA3	0.0987147	-0.230278	0.418	0.508	1	RPS6KA3	1.00562
FAM76B	0.0987596	0.104546	0.236	0.136	1	FAM76B	1.00542
SLC25A53	0.0990687	0.133602	0.109	0.042	1	SLC25A53	1.00406
IKZF5	0.0990687	0.0857684	0.109	0.042	1	IKZF5	1.00406
EIF2S2	0.0993409	0.295867	0.564	0.475	1	EIF2S2	1.00287
KDM1A	0.0993781	-0.219471	0.109	0.203	1	KDM1A	1.00271
MCMBP	0.0997871	0.127899	0.236	0.136	1	MCMBP	1.00093
RRP1B	0.0998023	0.193027	0.382	0.263	1	RRP1B	1.00086
NARF	0.0998636	0.199384	0.418	0.305	1	NARF	1.00059
CRTAM	0.10013	0.326615	0.145	0.068	1	CRTAM	0.999438
ABHD10	0.10013	0.155766	0.145	0.068	1	ABHD10	0.999438
SPRYD7	0.10013	0.147191	0.145	0.068	1	SPRYD7	0.999438
CETN2	0.10013	0.118493	0.145	0.068	1	CETN2	0.999438
CDC73	0.100219	-0.18478	0.091	0.186	1	CDC73	0.999049
ABCD4	0.100219	-0.209953	0.091	0.186	1	ABCD4	0.999049
TSEN15	0.100563	-0.150431	0.127	0.237	1	TSEN15	0.997563
TRNAU1AP	0.100633	0.174349	0.382	0.263	1	TRNAU1AP	0.997261
GAN	0.100657	0.0958727	0.109	0.042	1	GAN	0.997157
HADH	0.100666	0.192636	0.182	0.102	1	HADH	0.997118
APPL1	0.100668	-0.213732	0.2	0.305	1	APPL1	0.997109
FDPS	0.100877	0.171467	0.545	0.466	1	FDPS	0.996209
COMMD2	0.100915	0.0881671	0.382	0.254	1	COMMD2	0.996046
NDUFS7	0.10124	0.138554	0.491	0.347	1	NDUFS7	0.994649
RPL24	0.101409	-0.130023	1	1	1	RPL24	0.993922
PLAT	0.101476	-0.0908179	0.036	0.119	1	PLAT	0.993637
TSC22D3	0.101728	-0.177755	0.055	0.136	1	TSC22D3	0.992561
PDP2	0.10177	-0.230144	0.036	0.11	1	PDP2	0.99238
TBC1D10C	0.101973	-0.157913	0.491	0.653	1	TBC1D10C	0.991514
SF3A2	0.102038	0.180263	0.309	0.195	1	SF3A2	0.991237
KLHDC7B	0.102265	0.0946527	0.109	0.042	1	KLHDC7B	0.990273
NAA16	0.102401	-0.26928	0.091	0.178	1	NAA16	0.989695
TAF1D	0.102727	-0.11935	0.4	0.517	1	TAF1D	0.988316
DTYMK	0.102761	0.237415	0.309	0.212	1	DTYMK	0.988173
MRPS15	0.102761	0.121079	0.327	0.203	1	MRPS15	0.988173
KCTD17	0.102837	0.129697	0.145	0.068	1	KCTD17	0.987852
HIST2H2AC	0.102837	0.128267	0.145	0.068	1	HIST2H2AC	0.987852
PSMB1	0.103079	0.19039	0.855	0.831	1	PSMB1	0.986831
BST2	0.103159	-0.170299	0.655	0.729	1	BST2	0.986491
TSPAN32	0.103175	-0.174681	0.036	0.11	1	TSPAN32	0.986426
UQCRH	0.103557	0.16391	0.8	0.763	1	UQCRH	0.984819
CCDC107	0.103602	0.185426	0.491	0.364	1	CCDC107	0.984632
GPR82	0.103811	0.216512	0.291	0.186	1	GPR82	0.983757
USPL1	0.103894	0.0956152	0.109	0.042	1	USPL1	0.983411
GSTK1	0.104088	-0.206208	0.473	0.602	1	GSTK1	0.982599
ANXA2	0.104097	-0.292926	0.364	0.483	1	ANXA2	0.982562
PCED1A	0.104212	0.0881458	0.145	0.068	1	PCED1A	0.982082
WDR45	0.104236	0.149281	0.2	0.11	1	WDR45	0.981982
NDUFA1	0.104349	0.190397	0.655	0.525	1	NDUFA1	0.981513
ZMYM5	0.105053	0.132066	0.236	0.136	1	ZMYM5	0.978592
EPRS	0.105074	0.18745	0.455	0.339	1	EPRS	0.978506
TPGS2	0.105098	-0.240772	0.2	0.297	1	TPGS2	0.978404
MRPS34	0.105392	-0.2147	0.527	0.627	1	MRPS34	0.977194
ACYP1	0.105424	0.239505	0.182	0.102	1	ACYP1	0.97706
CROCC	0.105543	0.121363	0.109	0.042	1	CROCC	0.976571
MYO18A	0.105543	0.0855487	0.109	0.042	1	MYO18A	0.976571
SRSF6	0.105579	0.108563	0.291	0.178	1	SRSF6	0.976424
CENPK	0.105613	0.242207	0.236	0.144	1	CENPK	0.976282
NDUFA12	0.105756	0.200466	0.618	0.508	1	NDUFA12	0.975695
HAUS2	0.10603	-0.14356	0.036	0.11	1	HAUS2	0.974569
LINC01184	0.10603	-0.167042	0.036	0.11	1	LINC01184	0.974569
FAM50A	0.106034	-0.205228	0.345	0.475	1	FAM50A	0.974557
HAUS6	0.106132	0.109587	0.236	0.136	1	HAUS6	0.974153
DDB2	0.106317	0.171628	0.255	0.153	1	DDB2	0.973399
GNPDA1	0.106569	-0.107586	0.073	0.169	1	GNPDA1	0.972367
SNX2	0.106772	-0.176917	0.145	0.263	1	SNX2	0.971545
PGRMC2	0.10685	-0.160107	0.055	0.136	1	PGRMC2	0.971224
MTO1	0.10685	-0.172639	0.055	0.136	1	MTO1	0.971224
CSRP1	0.107006	0.0977003	0.145	0.068	1	CSRP1	0.97059
PRPF19	0.107213	0.0714087	0.109	0.042	1	PRPF19	0.969753
PHC1	0.107213	0.0585104	0.109	0.042	1	PHC1	0.969753
TIMM8A	0.107513	0.235977	0.127	0.059	1	TIMM8A	0.968539
HSD17B4	0.107621	0.118172	0.255	0.144	1	HSD17B4	0.968104
SMARCC1	0.107638	0.214805	0.345	0.246	1	SMARCC1	0.968033
STMN1	0.107758	0.46984	0.327	0.22	1	STMN1	0.967549
F8A1	0.108163	0.190183	0.164	0.085	1	F8A1	0.965923
44081	0.108347	0.126217	0.982	0.915	1	44081	0.965182
RPL7A	0.108751	-0.11669	1	1	1	RPL7A	0.963567
TBRG1	0.108845	0.217013	0.236	0.144	1	TBRG1	0.963191
DUSP16	0.108948	-0.140658	0.036	0.11	1	DUSP16	0.962779
ADGRG5	0.108948	-0.148362	0.036	0.11	1	ADGRG5	0.962779
UBE2L6	0.109482	-0.239436	0.382	0.483	1	UBE2L6	0.960658
CUL4A	0.109487	0.179945	0.164	0.085	1	CUL4A	0.960636
CEP152	0.109487	0.126159	0.164	0.085	1	CEP152	0.960636
PPIA	0.109634	0.181357	0.927	0.881	1	PPIA	0.960055
TIMM21	0.10986	0.0945856	0.145	0.068	1	TIMM21	0.959161
EIF3I	0.109925	-0.138808	0.473	0.568	1	EIF3I	0.958903
HAT1	0.110376	0.134541	0.364	0.237	1	HAT1	0.957127
SMPD1	0.110559	0.197381	0.127	0.059	1	SMPD1	0.956407
ACOT8	0.110559	0.195552	0.127	0.059	1	ACOT8	0.956407
PLCB2	0.110559	0.16443	0.127	0.059	1	PLCB2	0.956407
NFKBIZ	0.110615	0.049944	0.109	0.042	1	NFKBIZ	0.956185
SUCLA2	0.110857	0.0902712	0.255	0.144	1	SUCLA2	0.955236
THOC1	0.110857	-0.150572	0.109	0.212	1	THOC1	0.955236
PPM1B	0.111043	-0.188784	0.109	0.203	1	PPM1B	0.954509
PYHIN1	0.111257	0.149981	0.564	0.415	1	PYHIN1	0.953674
BRD3	0.111384	0.228601	0.273	0.178	1	BRD3	0.953178
BLMH	0.111525	0.11198	0.218	0.119	1	BLMH	0.952627
ZNF706	0.111945	0.152819	0.527	0.407	1	ZNF706	0.950994
CALCOCO1	0.111953	-0.173961	0.109	0.212	1	CALCOCO1	0.950965
MTRF1L	0.112176	-0.151489	0.055	0.136	1	MTRF1L	0.950102
C15orf61	0.112176	-0.177299	0.055	0.136	1	C15orf61	0.950102
BTG1	0.112388	-0.195855	0.945	0.983	1	BTG1	0.949281
RBM33	0.112407	-0.280861	0.236	0.339	1	RBM33	0.949206
KTN1	0.112465	0.139011	0.709	0.542	1	KTN1	0.948983
RSAD1	0.112584	0.207219	0.2	0.11	1	RSAD1	0.948522
TCHP	0.11271	0.0242654	0.218	0.119	1	TCHP	0.948039
SEC23B	0.112773	0.0591253	0.145	0.068	1	SEC23B	0.947795
TENT2	0.112784	-0.246477	0.127	0.229	1	TENT2	0.947754
HCFC1R1	0.112793	0.16177	0.236	0.136	1	HCFC1R1	0.947718
PPP1R2	0.113004	-0.214702	0.509	0.644	1	PPP1R2	0.946908
UTP18	0.113094	0.150345	0.218	0.127	1	UTP18	0.946561
BCL7C	0.113117	0.164504	0.473	0.364	1	BCL7C	0.946471
CCNI	0.113286	-0.183968	0.673	0.771	1	CCNI	0.945824
ECSIT	0.113539	0.141184	0.164	0.085	1	ECSIT	0.944855
HCFC1	0.113819	0.203525	0.2	0.11	1	HCFC1	0.943786
DCTN5	0.113819	0.137013	0.2	0.11	1	DCTN5	0.943786
GSKIP	0.114017	0.0973606	0.182	0.093	1	GSKIP	0.943032
PIAS4	0.114103	0.0426767	0.109	0.042	1	PIAS4	0.942704
GOSR2	0.114104	-0.144844	0.073	0.161	1	GOSR2	0.942699
SRGN	0.114244	-0.162486	1	0.958	1	SRGN	0.942166
DNTTIP2	0.114643	0.2019	0.418	0.288	1	DNTTIP2	0.940651
TCEAL4	0.114975	-0.130945	0.036	0.11	1	TCEAL4	0.939398
SARNP	0.114975	-0.153311	0.036	0.11	1	SARNP	0.939398
CAAP1	0.114983	-0.235901	0.127	0.22	1	CAAP1	0.939365
MED16	0.115108	0.105813	0.218	0.119	1	MED16	0.938895
COA3	0.115426	0.153506	0.327	0.22	1	COA3	0.937697
SLAMF7	0.115432	0.219236	0.527	0.424	1	SLAMF7	0.937675
ZBTB16	0.115798	0.186745	0.291	0.186	1	ZBTB16	0.936298
RNF10	0.116032	0.15224	0.255	0.153	1	RNF10	0.935424
NKTR	0.116116	0.172529	0.545	0.424	1	NKTR	0.935109
PTRH2	0.116305	0.128517	0.164	0.085	1	PTRH2	0.934401
HIST1H2BC	0.116305	-0.14984	0.055	0.136	1	HIST1H2BC	0.934401
CERS6	0.116521	-0.0877447	0.036	0.11	1	CERS6	0.933594
AMDHD2	0.116521	-0.142903	0.036	0.11	1	AMDHD2	0.933594
VPS36	0.116524	0.106786	0.436	0.314	1	VPS36	0.933583
FCER1G	0.11656	-0.159474	0.836	0.898	1	FCER1G	0.933449
ITGB1	0.116728	-0.187983	0.545	0.619	1	ITGB1	0.932824
STMN3	0.116783	-0.186012	0.073	0.153	1	STMN3	0.932622
UBE2Q1	0.116828	-0.208083	0.109	0.195	1	UBE2Q1	0.932452
OSBPL2	0.116854	0.159197	0.127	0.059	1	OSBPL2	0.932356
CMPK1	0.11697	-0.247619	0.273	0.39	1	CMPK1	0.931927
CD74	0.117561	-0.242218	0.618	0.678	1	CD74	0.929735
EMB	0.117745	0.183768	0.6	0.568	1	EMB	0.929059
PSMC3	0.117805	0.221538	0.436	0.305	1	PSMC3	0.928837
GPI	0.117847	0.139861	0.236	0.144	1	GPI	0.928683
LINC00861	0.117849	-0.248453	0.182	0.28	1	LINC00861	0.928674
TBPL1	0.117856	0.13407	0.291	0.178	1	TBPL1	0.92865
TRDC	0.117859	0.237469	0.927	0.89	1	TRDC	0.928637
DDX39A	0.117881	0.205767	0.436	0.322	1	DDX39A	0.928555
TSTA3	0.117918	0.130622	0.382	0.254	1	TSTA3	0.92842
CEP68	0.118085	-0.0975388	0.036	0.11	1	CEP68	0.927807
ZNF594	0.118471	0.154271	0.127	0.059	1	ZNF594	0.926388
VCPIP1	0.118592	0.0189005	0.236	0.136	1	VCPIP1	0.925945
PIGBOS1	0.11878	0.0785656	0.218	0.119	1	PIGBOS1	0.925256
NT5C3A	0.118797	0.177299	0.273	0.178	1	NT5C3A	0.925194
SCAF11	0.11909	-0.221556	0.582	0.712	1	SCAF11	0.924126
HDAC2	0.119111	0.143703	0.273	0.169	1	HDAC2	0.924048
DPYD	0.119253	-0.14056	0.073	0.161	1	DPYD	0.923529
ZNHIT1	0.119268	-0.257901	0.382	0.508	1	ZNHIT1	0.923477
RASA3	0.119433	-0.185597	0.073	0.153	1	RASA3	0.922877
TADA3	0.119806	0.20238	0.491	0.373	1	TADA3	0.92152
SYAP1	0.119881	-0.223109	0.182	0.28	1	SYAP1	0.92125
SNRPC	0.1199	0.152451	0.545	0.441	1	SNRPC	0.92118
IMP4	0.120028	-0.159445	0.145	0.254	1	IMP4	0.920718
PTRH1	0.120106	0.1642	0.127	0.059	1	PTRH1	0.920437
NADK	0.120152	0.11536	0.2	0.11	1	NADK	0.920269
LRRC37B	0.120347	-0.208411	0.055	0.127	1	LRRC37B	0.919566
RBM17	0.120386	-0.161056	0.345	0.466	1	RBM17	0.919423
CCDC159	0.120553	0.136531	0.164	0.085	1	CCDC159	0.918822
GNPTG	0.120553	-0.131598	0.055	0.136	1	GNPTG	0.918822
TRMT10C	0.120885	-0.204173	0.2	0.314	1	TRMT10C	0.917628
NUDT4	0.120927	-0.151557	0.091	0.186	1	NUDT4	0.917475
CHCHD5	0.121079	0.165584	0.364	0.246	1	CHCHD5	0.91693
AARS	0.12126	-0.0611567	0.036	0.11	1	AARS	0.916282
ANAPC5	0.121566	0.145579	0.473	0.356	1	ANAPC5	0.915188
INPP5D	0.121864	-0.209262	0.382	0.483	1	INPP5D	0.914125
TRPC4AP	0.12213	0.168166	0.182	0.102	1	TRPC4AP	0.913179
CREBBP	0.122279	0.165989	0.255	0.161	1	CREBBP	0.912649
COIL	0.122544	-0.139248	0.091	0.178	1	COIL	0.911709
PNPT1	0.122544	-0.168347	0.091	0.178	1	PNPT1	0.911709
ATP6V0E1	0.12293	0.145398	0.909	0.831	1	ATP6V0E1	0.910343
HLA-DMA	0.123385	-0.138155	0.109	0.212	1	HLA-DMA	0.908737
CKAP5	0.123428	0.165212	0.127	0.059	1	CKAP5	0.908588
CPLANE1	0.123428	-0.183238	0.036	0.102	1	CPLANE1	0.908588
BACH1	0.123428	-0.184666	0.036	0.102	1	BACH1	0.908588
HCCS	0.123496	-0.175801	0.073	0.153	1	HCCS	0.908347
NECAP2	0.123672	-0.262187	0.236	0.339	1	NECAP2	0.907728
TRIB2	0.123763	0.235307	0.236	0.144	1	TRIB2	0.90741
TMED2	0.123808	0.190312	0.491	0.347	1	TMED2	0.907253
LUC7L3	0.12384	-0.238774	0.655	0.754	1	LUC7L3	0.907138
CDK13	0.123886	0.145458	0.564	0.407	1	CDK13	0.906978
RPS9	0.123893	-0.0823257	1	1	1	RPS9	0.906953
ARPC1A	0.12398	0.191329	0.236	0.153	1	ARPC1A	0.906649
UBE3A	0.124046	0.149408	0.4	0.271	1	UBE3A	0.906416
STK24	0.124051	0.14362	0.218	0.127	1	STK24	0.9064
SNX18	0.124307	-0.154052	0.164	0.271	1	SNX18	0.905503
ZC3H7A	0.124325	-0.224865	0.145	0.237	1	ZC3H7A	0.905441
ARPC5L	0.124517	0.151456	0.764	0.653	1	ARPC5L	0.904771
SNF8	0.124585	0.21413	0.545	0.398	1	SNF8	0.904534
KPNA2	0.124595	0.279755	0.255	0.161	1	KPNA2	0.904499
FBXL3	0.124622	0.0995663	0.236	0.136	1	FBXL3	0.904406
LMO4	0.12463	-0.25166	0.255	0.356	1	LMO4	0.904378
CDC37	0.124921	-0.229022	0.418	0.517	1	CDC37	0.903365
CENPJ	0.125039	0.0646357	0.145	0.068	1	CENPJ	0.902955
TPI1	0.125161	0.179769	0.818	0.746	1	TPI1	0.902532
RBM38	0.125179	-0.213429	0.127	0.22	1	RBM38	0.902467
EIF3J	0.125207	0.113122	0.382	0.263	1	EIF3J	0.902371
GZMM	0.125545	0.18529	0.782	0.712	1	GZMM	0.9012
UQCR11	0.125572	0.21503	0.691	0.636	1	UQCR11	0.901109
PCMTD1	0.125656	0.108432	0.527	0.381	1	PCMTD1	0.900816
TEX30	0.125856	0.0942537	0.236	0.136	1	TEX30	0.900126
CDC26	0.125963	0.13346	0.418	0.297	1	CDC26	0.899757
TSG101	0.126179	-0.149066	0.2	0.331	1	TSG101	0.899014
EFHD2	0.126404	0.253613	0.764	0.737	1	EFHD2	0.898238
POLM	0.126405	0.102915	0.164	0.085	1	POLM	0.898236
NUTM2B-AS1	0.126561	0.215385	0.473	0.339	1	NUTM2B-AS1	0.897699
SS18L2	0.126561	0.171466	0.455	0.347	1	SS18L2	0.897699
DCP1A	0.126595	0.140455	0.218	0.127	1	DCP1A	0.897583
LRRC57	0.126595	0.120061	0.218	0.127	1	LRRC57	0.897583
HIST1H2AC	0.126758	0.157858	0.2	0.11	1	HIST1H2AC	0.897026
KDM7A	0.126821	0.15078	0.127	0.059	1	KDM7A	0.896809
CEP89	0.126821	0.128718	0.127	0.059	1	CEP89	0.896809
SNX10	0.126945	0.170954	0.255	0.161	1	SNX10	0.896384
BABAM1	0.127422	0.163722	0.236	0.144	1	BABAM1	0.894755
MEA1	0.12769	0.21248	0.309	0.212	1	MEA1	0.893842
PSME4	0.127706	-0.183377	0.091	0.178	1	PSME4	0.893788
TM7SF3	0.127725	-0.214915	0.109	0.195	1	TM7SF3	0.893724
CIB1	0.127845	0.195314	0.782	0.737	1	CIB1	0.893317
UFSP2	0.127868	-0.203203	0.055	0.127	1	UFSP2	0.893237
ARFIP1	0.127882	0.103332	0.218	0.127	1	ARFIP1	0.89319
GTF2A1	0.128112	0.109358	0.2	0.11	1	GTF2A1	0.89241
H3F3B	0.128334	-0.116482	1	0.992	1	H3F3B	0.89166
RMI2	0.128545	0.0838996	0.127	0.059	1	RMI2	0.890946
TMCO3	0.128545	-0.15566	0.036	0.102	1	TMCO3	0.890946
PUSL1	0.128545	-0.158736	0.036	0.102	1	PUSL1	0.890946
PIN1	0.128755	0.176339	0.491	0.373	1	PIN1	0.890234
AP2A1	0.128838	0.0950249	0.255	0.153	1	AP2A1	0.889956
BRAF	0.128838	-0.223333	0.127	0.212	1	BRAF	0.889956
ORMDL1	0.128968	0.177038	0.582	0.449	1	ORMDL1	0.889518
AKAP13	0.129391	-0.153595	0.527	0.653	1	AKAP13	0.888095
ANKFY1	0.129413	0.12324	0.164	0.085	1	ANKFY1	0.888024
GUSB	0.12991	0.259467	0.309	0.22	1	GUSB	0.886359
SH3GLB2	0.129928	0.138877	0.273	0.169	1	SH3GLB2	0.886298
CHST2	0.129985	0.183946	0.291	0.186	1	CHST2	0.886105
ABHD5	0.130097	-0.0758397	0.073	0.161	1	ABHD5	0.885732
CEP57L1	0.130286	0.0955456	0.127	0.059	1	CEP57L1	0.885101
SYTL2	0.130507	-0.226817	0.073	0.153	1	SYTL2	0.884366
SLC35B1	0.130535	0.144006	0.255	0.161	1	SLC35B1	0.884273
PMPCB	0.130697	-0.247102	0.091	0.169	1	PMPCB	0.883733
RPS19BP1	0.130737	0.169347	0.636	0.525	1	RPS19BP1	0.8836
BCLAF1	0.131051	0.14564	0.509	0.398	1	BCLAF1	0.88256
LRRC59	0.131165	0.164025	0.236	0.144	1	LRRC59	0.882182
HAUS3	0.13155	0.0381356	0.145	0.068	1	HAUS3	0.880909
CCDC102A	0.131688	-0.167974	0.091	0.178	1	CCDC102A	0.880455
YAF2	0.131704	0.166987	0.273	0.169	1	YAF2	0.880402
CCNT2	0.131805	0.143388	0.218	0.127	1	CCNT2	0.88007
YEATS4	0.131805	0.121684	0.218	0.127	1	YEATS4	0.88007
RUFY2	0.131946	-0.172971	0.073	0.153	1	RUFY2	0.879605
CTSS	0.131953	-0.147866	0.291	0.415	1	CTSS	0.87958
SURF6	0.132046	0.139585	0.127	0.059	1	SURF6	0.879273
KAT2B	0.132046	0.108923	0.127	0.059	1	KAT2B	0.879273
SLC25A26	0.132476	0.122064	0.164	0.085	1	SLC25A26	0.877864
SYNRG	0.132732	-0.187997	0.436	0.551	1	SYNRG	0.877026
RPL35A	0.132892	-0.121566	0.964	0.975	1	RPL35A	0.876502
KAT6B	0.132931	-0.102045	0.255	0.39	1	KAT6B	0.876374
COX6A1	0.133366	0.211883	0.782	0.695	1	COX6A1	0.874953
CRTC3	0.133498	-0.215732	0.145	0.229	1	CRTC3	0.874525
RASSF7	0.133643	0.0714831	0.2	0.11	1	RASSF7	0.874055
HDDC3	0.133643	0.0640941	0.2	0.11	1	HDDC3	0.874055
MDM4	0.133734	-0.181073	0.273	0.407	1	MDM4	0.873757
LTA4H	0.133758	0.0986259	0.255	0.153	1	LTA4H	0.87368
PPP1R3E	0.133825	0.09396	0.127	0.059	1	PPP1R3E	0.873463
LAG3	0.133825	0.05577	0.127	0.059	1	LAG3	0.873463
RALY	0.133832	0.208091	0.509	0.398	1	RALY	0.873439
RAN	0.133948	0.215273	0.818	0.771	1	RAN	0.873063
ACTN4	0.134852	0.192837	0.691	0.644	1	ACTN4	0.870141
STAT1	0.134923	0.11917	0.436	0.305	1	STAT1	0.869914
COMMD5	0.134993	0.127973	0.236	0.144	1	COMMD5	0.86969
MYL6	0.135012	0.115965	0.982	1	1	MYL6	0.869629
PCYT1A	0.135054	0.0770594	0.2	0.11	1	PCYT1A	0.869493
TMPO	0.135117	0.204776	0.455	0.347	1	TMPO	0.869291
HLA-DQB1	0.135144	-0.14703	0.091	0.186	1	HLA-DQB1	0.869203
B3GALT4	0.13538	0.121083	0.309	0.203	1	B3GALT4	0.868444
RPS6KC1	0.135622	0.126861	0.127	0.059	1	RPS6KC1	0.86767
WDR7	0.135622	0.113192	0.127	0.059	1	WDR7	0.86767
NUDT8	0.135622	0.096842	0.127	0.059	1	NUDT8	0.86767
ZNF398	0.135622	0.0931099	0.127	0.059	1	ZNF398	0.86767
MCCC2	0.135751	-0.166995	0.055	0.127	1	MCCC2	0.867257
TCEAL3	0.135751	-0.168348	0.055	0.127	1	TCEAL3	0.867257
ZNF611	0.135751	-0.204746	0.055	0.127	1	ZNF611	0.867257
NUSAP1	0.135876	0.408844	0.109	0.051	1	NUSAP1	0.866856
NRM	0.135876	0.24895	0.109	0.051	1	NRM	0.866856
FAM117A	0.136272	0.0953481	0.255	0.153	1	FAM117A	0.865594
TRIM56	0.136307	-0.174429	0.327	0.458	1	TRIM56	0.865481
BCL2L12	0.136335	0.113463	0.182	0.102	1	BCL2L12	0.865393
EDEM2	0.136369	0.153891	0.145	0.076	1	EDEM2	0.865285
DUSP23	0.136473	0.155971	0.327	0.22	1	DUSP23	0.864954
MZT1	0.136692	0.142404	0.255	0.161	1	MZT1	0.864256
MRPL13	0.136902	-0.143804	0.273	0.39	1	MRPL13	0.863589
C1orf123	0.137145	-0.190075	0.091	0.178	1	C1orf123	0.862819
SYTL1	0.137278	0.184353	0.4	0.297	1	SYTL1	0.8624
KANSL3	0.137437	0.139953	0.127	0.059	1	KANSL3	0.861895
FTSJ1	0.137437	-0.11959	0.036	0.102	1	FTSJ1	0.861895
DHX9	0.137542	0.117454	0.309	0.195	1	DHX9	0.861564
TNFRSF25	0.137542	0.111325	0.255	0.153	1	TNFRSF25	0.861563
ISY1	0.137592	-0.158606	0.109	0.203	1	ISY1	0.861407
GGA1	0.137598	0.135391	0.327	0.22	1	GGA1	0.861387
TMEM199	0.137623	0.135432	0.2	0.119	1	TMEM199	0.86131
FDX1	0.137664	0.183848	0.364	0.254	1	FDX1	0.861179
RCOR1	0.137829	0.143224	0.109	0.051	1	RCOR1	0.860658
BOLA3	0.137975	0.167722	0.327	0.229	1	BOLA3	0.860199
SLC25A45	0.138338	-0.167437	0.145	0.246	1	SLC25A45	0.859059
MT-ND4	0.13845	-0.0761792	1	1	1	MT-ND4	0.858707
HOXB4	0.13877	0.119598	0.164	0.085	1	HOXB4	0.857706
ZPR1	0.139041	0.17108	0.2	0.119	1	ZPR1	0.856856
CHST12	0.139225	0.153109	0.673	0.525	1	CHST12	0.856284
ODF2	0.139272	0.123077	0.127	0.059	1	ODF2	0.856138
GPSM2	0.139272	-0.137104	0.036	0.102	1	GPSM2	0.856138
GAPDH	0.139307	0.144188	0.982	0.949	1	GAPDH	0.856027
SLC38A1	0.139411	-0.183007	0.473	0.559	1	SLC38A1	0.855702
FUBP3	0.139722	0.144025	0.145	0.076	1	FUBP3	0.854736
TRMT61B	0.139804	0.151814	0.109	0.051	1	TRMT61B	0.854481
MAT2A	0.14	0.221621	0.309	0.22	1	MAT2A	0.853872
TUBB4B	0.140044	0.373964	0.509	0.424	1	TUBB4B	0.853734
RIPOR2	0.14005	-0.245216	0.182	0.271	1	RIPOR2	0.853716
NIPSNAP1	0.140378	0.0936654	0.164	0.085	1	NIPSNAP1	0.852699
RNPEP	0.140378	0.0763888	0.164	0.085	1	RNPEP	0.852699
NUDT3	0.140378	0.0661864	0.164	0.085	1	NUDT3	0.852699
SLC30A5	0.140471	0.184494	0.2	0.119	1	SLC30A5	0.852414
MAP2K3	0.140493	0.142893	0.255	0.161	1	MAP2K3	0.852346
KIN	0.140518	0.122773	0.345	0.229	1	KIN	0.852269
CDK2AP2	0.140557	0.21525	0.6	0.542	1	CDK2AP2	0.852147
ATP2A2	0.140743	-0.186957	0.109	0.195	1	ATP2A2	0.851574
ADRB2	0.140836	0.248548	0.182	0.102	1	ADRB2	0.851285
RNF139	0.140836	0.12979	0.182	0.102	1	RNF139	0.851285
ENTPD1	0.141124	0.0904555	0.127	0.059	1	ENTPD1	0.850398
CRYL1	0.141124	0.0833963	0.127	0.059	1	CRYL1	0.850398
SCRN3	0.141124	0.0695294	0.127	0.059	1	SCRN3	0.850398
B3GALNT2	0.141124	0.0681499	0.127	0.059	1	B3GALNT2	0.850398
RETREG1	0.141124	-0.118068	0.036	0.102	1	RETREG1	0.850398
TTI2	0.141124	-0.138191	0.036	0.102	1	TTI2	0.850398
LIMD2	0.141354	-0.139188	0.855	0.856	1	LIMD2	0.849692
SLC50A1	0.141422	0.119316	0.145	0.076	1	SLC50A1	0.849483
EXOC4	0.141563	0.140813	0.236	0.144	1	EXOC4	0.849049
RBM18	0.142283	0.100944	0.2	0.11	1	RBM18	0.846848
FAM160B1	0.142283	0.0476003	0.2	0.11	1	FAM160B1	0.846848
NEU1	0.142323	-0.142606	0.055	0.127	1	NEU1	0.846725
ITPK1	0.142362	0.130787	0.182	0.102	1	ITPK1	0.846606
AC097376.2	0.142423	-0.203228	0.127	0.22	1	AC097376.2	0.846419
RPL12	0.142842	-0.118062	1	0.992	1	RPL12	0.845145
ASH1L	0.142922	0.11461	0.473	0.356	1	ASH1L	0.844902
BCKDHB	0.142996	-0.138544	0.036	0.102	1	BCKDHB	0.844675
RB1CC1	0.143097	-0.26277	0.2	0.288	1	RB1CC1	0.844371
ATF1	0.143138	0.132442	0.145	0.076	1	ATF1	0.844246
SAT1	0.143271	-0.220012	0.255	0.347	1	SAT1	0.843842
ATOX1	0.143333	0.208257	0.327	0.22	1	ATOX1	0.843655
GUCD1	0.143425	-0.0453578	0.091	0.186	1	GUCD1	0.843375
SREK1IP1	0.143576	0.176122	0.309	0.212	1	SREK1IP1	0.842918
INO80E	0.143639	0.0909328	0.164	0.085	1	INO80E	0.842727
CHMP6	0.143722	-0.187348	0.127	0.22	1	CHMP6	0.842478
DNAJC27	0.143818	0.146438	0.109	0.051	1	DNAJC27	0.842187
RNF219	0.1439	0.13677	0.182	0.102	1	RNF219	0.841939
C17orf75	0.1439	0.135379	0.182	0.102	1	C17orf75	0.841939
UBE2N	0.144031	0.182435	0.491	0.398	1	UBE2N	0.841544
ERGIC2	0.144201	0.203734	0.418	0.305	1	ERGIC2	0.84103
HNRNPDL	0.144236	-0.195746	0.636	0.746	1	HNRNPDL	0.840927
WIPI2	0.144254	-0.214486	0.2	0.288	1	WIPI2	0.840871
ISOC2	0.144259	-0.142553	0.109	0.203	1	ISOC2	0.840856
PREX1	0.144285	0.168725	0.527	0.398	1	PREX1	0.840778
UBE2Z	0.14452	-0.201693	0.164	0.254	1	UBE2Z	0.840071
ZCCHC9	0.14463	0.133976	0.273	0.178	1	ZCCHC9	0.839741
TRIM4	0.144664	-0.200328	0.145	0.229	1	TRIM4	0.839639
NDUFB2	0.144676	0.178128	0.782	0.737	1	NDUFB2	0.839604
FAM76A	0.14471	-0.0669405	0.073	0.161	1	FAM76A	0.839501
GINS2	0.14487	0.134747	0.145	0.076	1	GINS2	0.839023
ZNF160	0.144887	-0.14066	0.036	0.102	1	ZNF160	0.83897
GALC	0.144887	-0.149543	0.036	0.102	1	GALC	0.83897
TNRC6B	0.144914	0.237838	0.636	0.492	1	TNRC6B	0.83889
KIAA1191	0.145291	0.089813	0.164	0.085	1	KIAA1191	0.83776
FAM122B	0.145291	0.0742606	0.164	0.085	1	FAM122B	0.83776
SH3GL1	0.145451	0.174873	0.182	0.102	1	SH3GL1	0.837283
NLRP2	0.145858	0.173747	0.109	0.051	1	NLRP2	0.83607
DPY19L1	0.145858	0.132342	0.109	0.051	1	DPY19L1	0.83607
PCNA	0.146004	0.271937	0.327	0.229	1	PCNA	0.835634
VDAC1	0.146009	-0.189599	0.382	0.534	1	VDAC1	0.835621
CCT7	0.146093	-0.204667	0.4	0.466	1	CCT7	0.835369
MRPL52	0.146252	0.118589	0.382	0.263	1	MRPL52	0.834897
NBEAL1	0.146618	0.170599	0.145	0.076	1	NBEAL1	0.833814
SNHG9	0.146687	0.197718	0.218	0.136	1	SNHG9	0.833609
PLIN2	0.146687	0.19541	0.218	0.136	1	PLIN2	0.833609
CD81	0.146726	0.0840866	0.964	0.881	1	CD81	0.833492
CD247	0.146937	0.13103	0.909	0.805	1	CD247	0.832869
NOC3L	0.147015	0.110505	0.182	0.102	1	NOC3L	0.832639
TBK1	0.147655	-0.223753	0.182	0.28	1	TBK1	0.830753
ABCC5	0.14792	0.146332	0.109	0.051	1	ABCC5	0.829973
GLYR1	0.148107	0.171346	0.218	0.136	1	GLYR1	0.829424
TC2N	0.148377	-0.211312	0.164	0.263	1	TC2N	0.828634
TMEM214	0.148382	0.136445	0.145	0.076	1	TMEM214	0.82862
ING2	0.148382	0.117183	0.145	0.076	1	ING2	0.82862
ZDHHC20	0.148432	0.120401	0.218	0.127	1	ZDHHC20	0.828472
NPC2	0.148464	-0.235039	0.145	0.237	1	NPC2	0.82838
METRN	0.148502	0.196817	0.255	0.169	1	METRN	0.828269
LTB	0.148712	-0.37834	0.764	0.805	1	LTB	0.827655
SYPL1	0.148831	-0.235658	0.218	0.305	1	SYPL1	0.827306
NAGLU	0.14917	-0.208849	0.073	0.144	1	NAGLU	0.826318
ASB1	0.149481	0.228053	0.164	0.093	1	ASB1	0.825413
ALDH16A1	0.149481	0.14265	0.164	0.093	1	ALDH16A1	0.825413
BAG5	0.149759	-0.159438	0.145	0.237	1	BAG5	0.824608
CBLB	0.150081	0.209221	0.509	0.39	1	CBLB	0.823674
EIF2D	0.150162	0.149008	0.145	0.076	1	EIF2D	0.823441
ODF2L	0.150341	-0.166364	0.291	0.39	1	ODF2L	0.822922
GLUD1	0.15035	-0.170287	0.127	0.22	1	GLUD1	0.822898
FASLG	0.150616	0.193851	0.527	0.407	1	FASLG	0.82213
RBBP8	0.150675	0.0265837	0.127	0.059	1	RBBP8	0.82196
ADPRM	0.150675	-0.110363	0.036	0.102	1	ADPRM	0.82196
MRPS2	0.150797	-0.15693	0.091	0.169	1	MRPS2	0.821608
MTOR	0.151783	0.103977	0.182	0.102	1	MTOR	0.818777
PHTF1	0.151783	-0.107198	0.073	0.153	1	PHTF1	0.818777
SMC5	0.152117	0.15316	0.364	0.263	1	SMC5	0.817823
AC245297.3	0.152263	0.102044	0.836	0.644	1	AC245297.3	0.817405
PMS2	0.152318	-0.211445	0.091	0.169	1	PMS2	0.817249
RAPGEF6	0.152425	0.180225	0.236	0.153	1	RAPGEF6	0.816942
LMBR1L	0.152635	-0.144168	0.055	0.127	1	LMBR1L	0.816345
KMT2D	0.152643	0.0547537	0.127	0.059	1	KMT2D	0.816324
CENPQ	0.152643	0.0239339	0.127	0.059	1	CENPQ	0.816324
CCDC88C	0.153616	0.146917	0.4	0.271	1	CCDC88C	0.813564
TANK	0.154226	-0.180384	0.236	0.331	1	TANK	0.811844
ZNF30	0.15424	0.184214	0.109	0.051	1	ZNF30	0.811803
PDLIM5	0.15424	0.121886	0.109	0.051	1	PDLIM5	0.811803
WWP1	0.154399	0.172631	0.291	0.186	1	WWP1	0.811356
CCDC97	0.154437	-0.149956	0.127	0.22	1	CCDC97	0.811249
GIT2	0.154504	0.0913845	0.273	0.169	1	GIT2	0.81106
MAK16	0.154683	-0.220369	0.055	0.119	1	MAK16	0.810557
TKT	0.154787	0.14186	0.473	0.347	1	TKT	0.810265
SUCLG2	0.155001	0.0679222	0.327	0.212	1	SUCLG2	0.809666
XPO6	0.155027	0.0911023	0.182	0.102	1	XPO6	0.809594
NINJ1	0.155027	0.0725017	0.182	0.102	1	NINJ1	0.809594
SRP54	0.155062	0.207372	0.382	0.297	1	SRP54	0.809494
SYNJ2BP	0.155759	-0.181323	0.073	0.144	1	SYNJ2BP	0.807547
GRB2	0.155765	0.164249	0.527	0.407	1	GRB2	0.80753
UQCRC1	0.156303	0.187028	0.236	0.161	1	UQCRC1	0.806031
GAK	0.156303	-0.182225	0.127	0.212	1	GAK	0.806031
MAP1S	0.156391	0.131505	0.109	0.051	1	MAP1S	0.805787
ARMH3	0.156391	0.120167	0.109	0.051	1	ARMH3	0.805787
PARP11	0.156391	0.110022	0.109	0.051	1	PARP11	0.805787
POLE	0.156391	0.109262	0.109	0.051	1	POLE	0.805787
PLAGL1	0.156391	0.0958349	0.109	0.051	1	PLAGL1	0.805787
GNLY	0.156552	-0.177008	0.891	0.932	1	GNLY	0.805343
TBCA	0.156621	0.251414	0.636	0.492	1	TBCA	0.805149
AGA	0.156637	-0.114984	0.036	0.102	1	AGA	0.805106
MICU3	0.156637	-0.137709	0.036	0.102	1	MICU3	0.805106
RPLP2	0.156661	-0.0889658	1	1	1	RPLP2	0.80504
LINC02084	0.156668	0.145715	0.182	0.102	1	LINC02084	0.80502
ULK3	0.157445	0.147464	0.145	0.076	1	ULK3	0.80287
PHF21A	0.157627	0.22585	0.2	0.127	1	PHF21A	0.80237
C21orf91	0.157683	-0.181989	0.109	0.195	1	C21orf91	0.802215
LRBA	0.157842	-0.186267	0.2	0.28	1	LRBA	0.801777
RIC8A	0.157907	0.150694	0.255	0.161	1	RIC8A	0.801599
CISD2	0.157989	0.150641	0.364	0.263	1	CISD2	0.801373
HIVEP3	0.158	-0.124707	0.055	0.127	1	HIVEP3	0.801343
SRPRB	0.158	-0.125227	0.055	0.127	1	SRPRB	0.801343
C8orf59	0.158041	0.19065	0.473	0.398	1	C8orf59	0.80123
ITGA1	0.158134	-0.226147	0.364	0.441	1	ITGA1	0.800974
RNF13	0.158363	-0.204502	0.182	0.271	1	RNF13	0.800347
GOLGA8A	0.15852	-0.164412	0.091	0.169	1	GOLGA8A	0.799916
CCHCR1	0.158566	0.0989367	0.109	0.051	1	CCHCR1	0.799791
BIVM	0.158663	0.0344887	0.127	0.059	1	BIVM	0.799523
MLYCD	0.158846	0.121199	0.218	0.127	1	MLYCD	0.799024
MYADM	0.158846	0.0903957	0.218	0.127	1	MYADM	0.799024
AMD1	0.159512	0.100733	0.364	0.246	1	AMD1	0.797208
GSN	0.159848	-0.182518	0.109	0.186	1	GSN	0.796292
PQLC3	0.160749	0.16302	0.255	0.169	1	PQLC3	0.793851
SH3KBP1	0.160751	0.105336	0.527	0.398	1	SH3KBP1	0.793847
NGLY1	0.160806	0.159293	0.345	0.246	1	NGLY1	0.793697
ZNF121	0.161186	0.122417	0.145	0.076	1	ZNF121	0.792672
DHPS	0.161342	0.100478	0.273	0.169	1	DHPS	0.792254
JAML	0.161364	-0.352521	0.109	0.186	1	JAML	0.792193
ERCC1	0.161432	0.157254	0.345	0.237	1	ERCC1	0.79201
EIF1B	0.161734	-0.152784	0.4	0.492	1	EIF1B	0.791198
MRPL16	0.161996	-0.182377	0.2	0.297	1	MRPL16	0.790497
APOL6	0.162013	0.214846	0.4	0.305	1	APOL6	0.790451
VSIR	0.162038	-0.201307	0.145	0.229	1	VSIR	0.790384
CD3D	0.162148	-0.241897	0.127	0.22	1	CD3D	0.790089
GOSR1	0.162234	0.195779	0.309	0.212	1	GOSR1	0.789859
ELOC	0.162379	-0.15184	0.382	0.483	1	ELOC	0.78947
NT5DC1	0.162448	-0.250389	0.127	0.203	1	NT5DC1	0.789287
RPS24	0.162464	-0.0828546	1	0.992	1	RPS24	0.789243
STK10	0.162547	0.10927	0.473	0.356	1	STK10	0.78902
NECAP1	0.162566	-0.174478	0.073	0.144	1	NECAP1	0.78897
RUFY3	0.162983	0.0992183	0.109	0.051	1	RUFY3	0.787858
LAPTM4B	0.162983	0.0848409	0.109	0.051	1	LAPTM4B	0.787858
MKRN1	0.163185	0.133469	0.273	0.178	1	MKRN1	0.78732
NELFCD	0.163258	0.184095	0.327	0.237	1	NELFCD	0.787126
FLII	0.163919	0.129491	0.236	0.153	1	FLII	0.78537
CRTC2	0.164036	-0.179318	0.055	0.119	1	CRTC2	0.785062
HAGHL	0.164036	-0.19491	0.055	0.119	1	HAGHL	0.785062
DNAJA2	0.164244	-0.174387	0.291	0.407	1	DNAJA2	0.78451
NAA60	0.164302	-0.180226	0.073	0.144	1	NAA60	0.784356
LSM1	0.164354	0.148162	0.4	0.305	1	LSM1	0.78422
RPS12	0.164434	-0.0807131	1	1	1	RPS12	0.784009
IL7R	0.164602	-0.351059	0.309	0.415	1	IL7R	0.783566
MFSD14C	0.164911	0.10337	0.2	0.119	1	MFSD14C	0.78275
TRMT13	0.165086	0.0785234	0.291	0.186	1	TRMT13	0.782289
GABARAPL2	0.165218	-0.152393	0.509	0.593	1	GABARAPL2	0.781944
ASPSCR1	0.165226	0.101019	0.109	0.051	1	ASPSCR1	0.781922
HPGD	0.165226	0.0985209	0.109	0.051	1	HPGD	0.781922
RNPS1	0.165299	-0.167717	0.382	0.492	1	RNPS1	0.781729
ST6GAL1	0.165956	-0.173228	0.055	0.119	1	ST6GAL1	0.780007
CDK17	0.166053	-0.164262	0.073	0.144	1	CDK17	0.779754
PPA1	0.16611	0.120059	0.4	0.28	1	PPA1	0.779604
GID8	0.166988	0.211239	0.327	0.229	1	GID8	0.777315
S100A11	0.167255	-0.103115	0.927	0.898	1	S100A11	0.776621
MCEE	0.167492	0.101283	0.109	0.051	1	MCEE	0.776006
SKIV2L	0.167492	0.0946883	0.109	0.051	1	SKIV2L	0.776006
AC006033.2	0.167492	0.0858802	0.109	0.051	1	AC006033.2	0.776006
INSIG1	0.167492	0.0765798	0.109	0.051	1	INSIG1	0.776006
GMDS-DT	0.167492	0.0746271	0.109	0.051	1	GMDS-DT	0.776006
MOB4	0.167506	-0.19453	0.182	0.271	1	MOB4	0.775971
C2orf74	0.168254	-0.0671871	0.109	0.195	1	C2orf74	0.774034
NUDT21	0.168393	0.152735	0.236	0.153	1	NUDT21	0.773676
BOLA1	0.168394	0.156077	0.236	0.153	1	BOLA1	0.773674
KMT5B	0.168394	0.151653	0.236	0.153	1	KMT5B	0.773674
RPL18A	0.168428	-0.0812358	1	1	1	RPL18A	0.773587
PANK3	0.168529	0.0714742	0.182	0.102	1	PANK3	0.773325
SNX20	0.168536	-0.199891	0.255	0.347	1	SNX20	0.773306
COPS2	0.168594	0.0982409	0.291	0.195	1	COPS2	0.773158
FGD3	0.168843	-0.103411	0.164	0.28	1	FGD3	0.772516
ZNF236	0.168869	0.0672734	0.145	0.076	1	ZNF236	0.772451
ATF7	0.169157	-0.0841368	0.055	0.127	1	ATF7	0.771711
CCND3	0.169221	-0.0918418	0.4	0.466	1	CCND3	0.771546
UBB	0.169423	0.125757	1	0.941	1	UBB	0.771027
GABPB1-AS1	0.169719	-0.216768	0.455	0.5	1	GABPB1-AS1	0.770269
SCRIB	0.169781	0.100182	0.109	0.051	1	SCRIB	0.77011
BTBD7	0.169803	-0.260736	0.109	0.178	1	BTBD7	0.770054
PLEKHJ1	0.170123	-0.166504	0.236	0.339	1	PLEKHJ1	0.769238
EXOSC8	0.170256	0.0883961	0.345	0.22	1	EXOSC8	0.768897
YIF1B	0.170277	-0.0893134	0.073	0.153	1	YIF1B	0.768844
SLC35E3	0.170402	0.139701	0.164	0.093	1	SLC35E3	0.768525
UBE2D2	0.171046	0.135155	0.673	0.542	1	UBE2D2	0.766887
COMMD6	0.171134	-0.126744	0.782	0.831	1	COMMD6	0.766664
CXorf40B	0.171387	-0.167921	0.073	0.144	1	CXorf40B	0.766021
TMEM248	0.171398	0.121142	0.418	0.305	1	TMEM248	0.765995
RNF165	0.171494	0.147877	0.2	0.119	1	RNF165	0.765751
SDE2	0.171494	-0.14159	0.091	0.169	1	SDE2	0.765751
ROMO1	0.171594	0.214438	0.436	0.364	1	ROMO1	0.765498
ZNF134	0.172094	0.0849774	0.109	0.051	1	ZNF134	0.764234
RMI1	0.172094	0.0839548	0.109	0.051	1	RMI1	0.764234
ARRDC2	0.172393	0.130769	0.182	0.11	1	ARRDC2	0.763482
UFC1	0.172466	-0.197883	0.545	0.593	1	UFC1	0.763297
FKBP8	0.17289	0.162585	0.618	0.534	1	FKBP8	0.762231
CD44	0.173007	-0.138649	0.745	0.763	1	CD44	0.761936
GSS	0.17317	0.0846939	0.2	0.119	1	GSS	0.761527
TRAPPC6A	0.173357	0.168836	0.436	0.331	1	TRAPPC6A	0.761059
AKR1B1	0.173375	-0.144676	0.164	0.263	1	AKR1B1	0.761014
CCDC186	0.173419	-0.226862	0.236	0.322	1	CCDC186	0.760903
LPP	0.173623	-0.186033	0.2	0.297	1	LPP	0.760392
HSCB	0.173814	0.0657673	0.182	0.102	1	HSCB	0.759915
ECI1	0.173877	0.135463	0.236	0.161	1	ECI1	0.759757
SCCPDH	0.173883	0.129982	0.218	0.136	1	SCCPDH	0.759742
SNHG8	0.17433	-0.20941	0.309	0.407	1	SNHG8	0.758628
CTSD	0.174838	0.127788	0.836	0.78	1	CTSD	0.757364
NUP58	0.174952	-0.0771396	0.055	0.127	1	NUP58	0.757082
BPGM	0.174952	-0.0947788	0.055	0.127	1	BPGM	0.757082
C16orf72	0.175236	-0.0776416	0.127	0.229	1	C16orf72	0.756376
SUCO	0.175813	-0.132069	0.055	0.119	1	SUCO	0.754948
GFM1	0.17596	0.119156	0.164	0.093	1	GFM1	0.754586
NSFL1C	0.176054	0.112764	0.236	0.153	1	NSFL1C	0.754354
PIP4K2B	0.176222	0.161197	0.127	0.068	1	PIP4K2B	0.753939
RAB10	0.176241	0.13031	0.364	0.271	1	RAB10	0.753893
PSMB8	0.176422	0.103428	0.8	0.771	1	PSMB8	0.753447
JHY	0.176791	0.185718	0.109	0.051	1	JHY	0.752541
MFN2	0.176791	0.0584789	0.109	0.051	1	MFN2	0.752541
FAM173A	0.176808	-0.150855	0.345	0.466	1	FAM173A	0.752498
DCAF13	0.176908	0.105233	0.345	0.237	1	DCAF13	0.752252
ZNF524	0.176908	0.110624	0.255	0.161	1	ZNF524	0.752252
ARL1	0.177039	0.129257	0.309	0.212	1	ARL1	0.751931
DDT	0.177237	0.121272	0.673	0.492	1	DDT	0.751445
NDUFB6	0.177441	0.106153	0.527	0.398	1	NDUFB6	0.750946
MAP4K5	0.177664	0.164321	0.182	0.11	1	MAP4K5	0.750401
AKIRIN1	0.178246	0.0982024	0.345	0.237	1	AKIRIN1	0.748979
SFMBT2	0.178272	0.0708804	0.2	0.119	1	SFMBT2	0.748917
FAM107B	0.178555	-0.190391	0.527	0.585	1	FAM107B	0.748229
TGFB1	0.17876	0.173138	0.727	0.678	1	TGFB1	0.74773
IFNAR1	0.178761	0.115283	0.218	0.136	1	IFNAR1	0.747728
TPP1	0.178918	0.190109	0.327	0.246	1	TPP1	0.747345
EBLN3P	0.178981	-0.144818	0.145	0.237	1	EBLN3P	0.747194
EIF3F	0.17906	0.116308	0.709	0.627	1	EIF3F	0.747002
BCAT2	0.179174	0.0104115	0.109	0.051	1	BCAT2	0.746724
CFL1	0.179256	0.0983378	0.964	0.992	1	CFL1	0.746527
AC114760.2	0.179638	-0.230955	0.109	0.178	1	AC114760.2	0.745602
ARID4A	0.179642	0.17208	0.364	0.28	1	ARID4A	0.745592
C1D	0.179868	-0.187687	0.327	0.432	1	C1D	0.745045
NPEPPS	0.180266	0.137221	0.309	0.229	1	NPEPPS	0.744087
ADAR	0.180282	-0.153937	0.418	0.508	1	ADAR	0.744046
LSM10	0.180467	0.094586	0.491	0.356	1	LSM10	0.743601
DYNLRB1	0.180783	-0.180038	0.545	0.653	1	DYNLRB1	0.742842
BOD1L1	0.180819	0.138141	0.691	0.602	1	BOD1L1	0.742756
KIF3A	0.180903	0.0689843	0.145	0.076	1	KIF3A	0.742555
CEP164	0.180903	0.0415159	0.145	0.076	1	CEP164	0.742555
CYTH4	0.181026	-0.240818	0.291	0.373	1	CYTH4	0.742259
CBX1	0.181244	0.138608	0.182	0.11	1	CBX1	0.741736
SLC10A3	0.181582	0.0480141	0.109	0.051	1	SLC10A3	0.740928
UCKL1	0.181652	0.0924381	0.164	0.093	1	UCKL1	0.74076
MIGA1	0.181735	0.0823714	0.2	0.119	1	MIGA1	0.740562
PSMA3	0.181855	-0.146202	0.436	0.542	1	PSMA3	0.740275
PCNP	0.182183	0.173871	0.436	0.347	1	PCNP	0.739492
MED30	0.182461	0.252276	0.255	0.178	1	MED30	0.73883
TMEM18	0.182461	0.181032	0.255	0.178	1	TMEM18	0.73883
CISD1	0.182753	0.0656083	0.382	0.263	1	CISD1	0.738134
MGAT1	0.182753	0.0472195	0.382	0.263	1	MGAT1	0.738134
HDAC3	0.182835	0.199327	0.255	0.169	1	HDAC3	0.73794
FLNA	0.182885	0.206913	0.418	0.331	1	FLNA	0.737822
EML3	0.182907	0.182738	0.145	0.085	1	EML3	0.737769
U2AF1L4	0.182969	0.0704338	0.145	0.076	1	U2AF1L4	0.737623
EHMT2	0.182969	0.0648078	0.145	0.076	1	EHMT2	0.737623
YEATS2	0.182969	0.0577	0.145	0.076	1	YEATS2	0.737623
TMEM70	0.183085	0.0894972	0.255	0.161	1	TMEM70	0.737348
AC243960.1	0.18309	0.0921736	0.327	0.237	1	AC243960.1	0.737336
CDC42	0.183148	0.0836385	0.818	0.78	1	CDC42	0.737197
TFDP2	0.183199	-0.218618	0.127	0.212	1	TFDP2	0.737076
TRIM69	0.183485	0.101871	0.2	0.119	1	TRIM69	0.736399
TUBB	0.18378	0.3075	0.691	0.653	1	TUBB	0.735702
ATP2B1	0.184269	0.114669	0.291	0.195	1	ATP2B1	0.734549
FNBP4	0.184309	0.171574	0.382	0.288	1	FNBP4	0.734454
TMED4	0.184538	0.126089	0.364	0.263	1	TMED4	0.733915
RBX1	0.184637	0.151834	0.727	0.653	1	RBX1	0.733682
RNF169	0.184788	-0.106941	0.127	0.212	1	RNF169	0.733326
RBM10	0.184788	-0.125114	0.127	0.212	1	RBM10	0.733326
LRRC58	0.185052	0.077442	0.145	0.076	1	LRRC58	0.732706
APOL3	0.185162	-0.129697	0.182	0.288	1	APOL3	0.732449
NSD3	0.185307	-0.222701	0.4	0.466	1	NSD3	0.732108
EDEM1	0.185586	0.112796	0.236	0.153	1	EDEM1	0.731456
CEBPZOS	0.185609	0.142447	0.382	0.28	1	CEBPZOS	0.7314
NAXE	0.185616	0.174543	0.382	0.288	1	NAXE	0.731385
LAT	0.185716	0.0505496	0.436	0.297	1	LAT	0.73115
GOPC	0.185942	0.170241	0.255	0.169	1	GOPC	0.730622
ZNHIT3	0.186085	0.132558	0.418	0.314	1	ZNHIT3	0.730288
USP8	0.186085	-0.208825	0.291	0.373	1	USP8	0.730288
MRPS12	0.18611	0.123123	0.527	0.415	1	MRPS12	0.73023
CD2AP	0.186387	-0.176056	0.127	0.212	1	CD2AP	0.729583
ADRM1	0.186513	0.12282	0.509	0.381	1	ADRM1	0.729291
AC016831.5	0.186541	-0.172117	0.091	0.161	1	AC016831.5	0.729225
KLF2	0.186541	-0.315569	0.091	0.161	1	KLF2	0.729225
TYMS	0.186715	0.340466	0.182	0.11	1	TYMS	0.728821
ETS1	0.186851	0.133141	0.764	0.686	1	ETS1	0.728505
HPRT1	0.186971	0.128811	0.309	0.212	1	HPRT1	0.728226
YPEL5	0.187075	-0.142126	0.145	0.229	1	YPEL5	0.727983
MMD	0.187153	0.0558778	0.145	0.076	1	MMD	0.727802
LDHA	0.187261	0.151902	0.909	0.839	1	LDHA	0.727553
ASAH1	0.187291	0.293698	0.309	0.229	1	ASAH1	0.727482
CD63	0.187304	-0.134105	1	0.983	1	CD63	0.727454
ADAM8	0.187318	0.130952	0.327	0.229	1	ADAM8	0.72742
P2RX5	0.18748	0.340472	0.164	0.093	1	P2RX5	0.727046
RBBP7	0.187608	0.119304	0.345	0.246	1	RBBP7	0.726748
TTC39C	0.187771	0.153911	0.455	0.339	1	TTC39C	0.726371
HIBCH	0.188148	0.134738	0.273	0.186	1	HIBCH	0.725501
DNAJC13	0.18821	-0.104443	0.055	0.119	1	DNAJC13	0.725356
DDHD2	0.18821	-0.117374	0.055	0.119	1	DDHD2	0.725356
MOSMO	0.18821	-0.157914	0.055	0.119	1	MOSMO	0.725356
HGSNAT	0.188357	-0.160342	0.091	0.161	1	HGSNAT	0.725019
MRPL49	0.188357	-0.193441	0.091	0.161	1	MRPL49	0.725019
HNRNPF	0.188396	0.13261	0.8	0.754	1	HNRNPF	0.724927
PSMA3-AS1	0.18842	0.131702	0.545	0.449	1	PSMA3-AS1	0.724872
PARP9	0.188423	0.137939	0.309	0.212	1	PARP9	0.724866
CWF19L2	0.188423	0.101156	0.309	0.212	1	CWF19L2	0.724866
ATP5PO	0.188571	0.112288	0.727	0.585	1	ATP5PO	0.724526
DNAJC9	0.188668	0.158216	0.327	0.237	1	DNAJC9	0.724302
ARHGAP5	0.188819	-0.142905	0.109	0.186	1	ARHGAP5	0.723953
SRPRA	0.188879	0.0965453	0.382	0.271	1	SRPRA	0.723817
ATAD3A	0.188948	0.0480108	0.109	0.051	1	ATAD3A	0.723658
AHCY	0.188948	0.047574	0.109	0.051	1	AHCY	0.723658
GCHFR	0.188957	-0.179384	0.291	0.381	1	GCHFR	0.723636
OGDH	0.189048	0.200291	0.145	0.085	1	OGDH	0.723429
CFL2	0.189048	0.111562	0.145	0.085	1	CFL2	0.723429
ABHD2	0.189088	-0.0792875	0.127	0.229	1	ABHD2	0.723336
ORC6	0.189384	0.10862	0.127	0.068	1	ORC6	0.722658
NDUFC2	0.189425	0.126182	0.745	0.619	1	NDUFC2	0.722563
PFKL	0.189452	0.0988981	0.164	0.093	1	PFKL	0.7225
VAMP2	0.189513	-0.175132	0.582	0.686	1	VAMP2	0.722361
CD151	0.189609	0.0600631	0.273	0.178	1	CD151	0.722142
SRA1	0.189883	0.10959	0.309	0.212	1	SRA1	0.721514
RAB8B	0.189924	0.173897	0.327	0.246	1	RAB8B	0.721419
DMAC1	0.190082	0.139311	0.345	0.254	1	DMAC1	0.72106
YBEY	0.190185	-0.119846	0.091	0.161	1	YBEY	0.720823
SNAPC1	0.190185	-0.184105	0.091	0.161	1	SNAPC1	0.720823
PDE4B	0.190429	0.127409	0.182	0.11	1	PDE4B	0.720267
TSEN34	0.190429	0.12203	0.182	0.11	1	TSEN34	0.720267
MBD5	0.190492	0.117296	0.236	0.153	1	MBD5	0.720124
43892	0.190492	-0.173358	0.127	0.203	1	43892	0.720123
PTPN12	0.19061	0.0542925	0.2	0.119	1	PTPN12	0.719854
BRWD1	0.19071	0.144443	0.291	0.203	1	BRWD1	0.719627
SRP9	0.190733	0.209832	0.618	0.602	1	SRP9	0.719574
UIMC1	0.191217	0.101486	0.273	0.186	1	UIMC1	0.718473
UBE2M	0.191226	0.161255	0.564	0.475	1	UBE2M	0.718452
TAF1	0.19144	0.149967	0.164	0.093	1	TAF1	0.717966
CENPW	0.191646	0.0947725	0.127	0.068	1	CENPW	0.717501
MPLKIP	0.191697	0.134773	0.509	0.407	1	MPLKIP	0.717385
WDR60	0.192048	-0.130375	0.073	0.144	1	WDR60	0.716589
EXOSC1	0.192261	-0.154276	0.236	0.339	1	EXOSC1	0.716108
ZNF302	0.19229	0.0121196	0.4	0.271	1	ZNF302	0.716043
DKC1	0.192497	0.175644	0.345	0.246	1	DKC1	0.715577
CHCHD3	0.192579	0.138258	0.2	0.127	1	CHCHD3	0.715391
GANAB	0.192647	-0.250566	0.145	0.212	1	GANAB	0.715238
PPP6R3	0.192687	-0.177009	0.164	0.246	1	PPP6R3	0.715148
PHF14	0.192752	0.205897	0.327	0.246	1	PHF14	0.715001
TCEA1	0.19319	-0.158233	0.436	0.5	1	TCEA1	0.714015
NIFK	0.193256	0.115071	0.491	0.364	1	NIFK	0.713868
TPM3	0.193327	0.135283	0.873	0.805	1	TPM3	0.713708
HSPA4	0.193605	0.139284	0.382	0.288	1	HSPA4	0.713082
RNF216	0.19388	0.19145	0.255	0.169	1	RNF216	0.712466
PTPN11	0.19388	0.139659	0.255	0.169	1	PTPN11	0.712466
ASCC2	0.19388	0.103838	0.255	0.169	1	ASCC2	0.712466
ZNF569	0.193928	0.0987685	0.127	0.068	1	ZNF569	0.71236
TMEM131L	0.194014	-0.100564	0.073	0.144	1	TMEM131L	0.712167
PTPRN2	0.194289	0.217349	0.109	0.059	1	PTPRN2	0.711551
LSM5	0.19434	-0.136245	0.327	0.449	1	LSM5	0.711437
UBR2	0.194371	0.0313859	0.345	0.229	1	UBR2	0.711369
FAM32A	0.194923	0.0876869	0.382	0.263	1	FAM32A	0.710138
ATE1	0.195463	0.0973065	0.164	0.093	1	ATE1	0.708936
CSGALNACT2	0.195494	0.110178	0.236	0.153	1	CSGALNACT2	0.708867
GTF2F1	0.195573	-0.166785	0.182	0.263	1	GTF2F1	0.708692
ZNF775	0.195734	0.0434767	0.145	0.076	1	ZNF775	0.708334
CASP2	0.195749	-0.123968	0.091	0.161	1	CASP2	0.7083
SURF1	0.195969	-0.088183	0.218	0.322	1	SURF1	0.707813
CHCHD1	0.196196	0.0943894	0.527	0.449	1	CHCHD1	0.70731
NUDT19	0.19623	0.111103	0.127	0.068	1	NUDT19	0.707235
TSC22D1	0.19623	0.0971881	0.127	0.068	1	TSC22D1	0.707235
SAMD9	0.196318	-0.255217	0.509	0.576	1	SAMD9	0.70704
POLD2	0.196318	0.173457	0.218	0.153	1	POLD2	0.70704
CBX6	0.196398	-0.121912	0.218	0.314	1	CBX6	0.706864
ARID1B	0.196641	0.103823	0.491	0.381	1	ARID1B	0.706326
ZNF44	0.196826	-0.112241	0.055	0.119	1	ZNF44	0.705917
AHNAK	0.197304	-0.194423	0.327	0.424	1	AHNAK	0.704864
TPP2	0.197464	-0.170347	0.2	0.28	1	TPP2	0.704512
PTPA	0.197497	0.143038	0.164	0.093	1	PTPA	0.70444
TMEM242	0.197515	0.114715	0.218	0.136	1	TMEM242	0.704399
PTBP3	0.197526	0.166409	0.4	0.314	1	PTBP3	0.704377
LDLRAP1	0.19763	-0.170021	0.091	0.161	1	LDLRAP1	0.704147
ARAP1	0.19802	0.130017	0.182	0.11	1	ARAP1	0.703291
AGL	0.198034	-0.220828	0.127	0.195	1	AGL	0.70326
MIF4GD	0.198298	0.142537	0.291	0.203	1	MIF4GD	0.702683
HM13	0.198481	0.114165	0.473	0.364	1	HM13	0.702281
KMT2A	0.198521	-0.0577536	0.4	0.542	1	KMT2A	0.702194
PIGN	0.198551	0.0770859	0.127	0.068	1	PIGN	0.702127
ARHGAP18	0.19861	0.242754	0.291	0.212	1	ARHGAP18	0.701999
PTGES2	0.198761	0.111898	0.255	0.169	1	PTGES2	0.701669
SELENOH	0.198887	0.0921832	0.745	0.636	1	SELENOH	0.701394
IFITM1	0.198935	0.168544	0.4	0.288	1	IFITM1	0.701289
ZNF720	0.199082	-0.134657	0.145	0.237	1	ZNF720	0.700968
PMEPA1	0.199222	0.143301	0.255	0.161	1	PMEPA1	0.700662
PAPSS1	0.199546	0.0780453	0.164	0.093	1	PAPSS1	0.699956
TFPT	0.199546	0.0725824	0.164	0.093	1	TFPT	0.699956
AP3M2	0.199551	0.130274	0.236	0.161	1	AP3M2	0.699947
FIGNL1	0.199617	0.145036	0.145	0.085	1	FIGNL1	0.699802
CD52	0.199667	-0.1485	0.8	0.847	1	CD52	0.699693
FIP1L1	0.200141	0.217232	0.291	0.212	1	FIP1L1	0.698664
ACAT2	0.200141	0.197851	0.291	0.212	1	ACAT2	0.698664
NDUFV3	0.200141	-0.164491	0.182	0.263	1	NDUFV3	0.698664
KRT10	0.201261	-0.163473	0.582	0.644	1	KRT10	0.696241
ZNF12	0.201432	-0.169977	0.091	0.161	1	ZNF12	0.695873
GIMAP5	0.201436	0.18611	0.255	0.178	1	GIMAP5	0.695864
HEBP1	0.201611	0.134059	0.164	0.093	1	HEBP1	0.695485
HMGXB3	0.201611	0.0833769	0.164	0.093	1	HMGXB3	0.695485
CD79B	0.201676	0.0509923	0.2	0.119	1	CD79B	0.695345
RPN1	0.201683	0.141383	0.2	0.127	1	RPN1	0.69533
RARS2	0.201782	0.154511	0.145	0.085	1	RARS2	0.695118
ZC3H13	0.201926	0.125875	0.455	0.356	1	ZC3H13	0.694808
SMIM27	0.202023	-0.0910437	0.073	0.144	1	SMIM27	0.694599
IST1	0.202251	0.11696	0.273	0.186	1	IST1	0.694109
PITPNC1	0.202627	0.2289	0.436	0.356	1	PITPNC1	0.693303
API5	0.202955	0.133599	0.291	0.203	1	API5	0.6926
C1orf162	0.20316	0.219926	0.327	0.237	1	C1orf162	0.692161
TLNRD1	0.203255	0.12474	0.127	0.068	1	TLNRD1	0.691958
ZNF654	0.203255	0.103536	0.127	0.068	1	ZNF654	0.691958
AC007952.4	0.203255	0.0965876	0.127	0.068	1	AC007952.4	0.691958
SNX9	0.203255	0.0963678	0.127	0.068	1	SNX9	0.691958
AL359220.1	0.203255	0.0951406	0.127	0.068	1	AL359220.1	0.691958
COX18	0.203255	0.0928385	0.127	0.068	1	COX18	0.691958
PDGFD	0.203255	0.0880009	0.127	0.068	1	PDGFD	0.691958
ARRDC3	0.203352	-0.144155	0.091	0.161	1	ARRDC3	0.691751
NCL	0.203588	0.147014	0.891	0.847	1	NCL	0.691248
YTHDF1	0.203692	0.045421	0.164	0.093	1	YTHDF1	0.691026
[truncated: 4,467 more rows]

## Sheet: S4E PD-L1 vs. Bispecific
Table S4E: NK Cell Differential Expression Bispecific vs. PD-L1
[truncated: 6,196 more rows]
